# Supplementary material for: Cardiomyocytes stimulate angiogenesis after ischemic injury in a ZEB2-dependent manner
Source: Springer Nature journal article supplement (doi:10.1038/s41467-020-20361-3), 2021-01-04
Supplement: MOESM1 [file 41467_2020_20361_MOESM1_ESM.pdf]

# Supplementary information

## **Cardiomyocytes stimulate angiogenesis after ischemic injury in a ZEB2-dependent manner**

Authors: Monika M. Gladka<sup>1</sup>, Arwa Kohela<sup>1</sup>, Bas Molenaar<sup>1</sup>, Danielle Versteeg<sup>1,2</sup>, Lieneke Kooijman<sup>1</sup>, Jantine Monshouwer-Kloots<sup>1</sup>, Veerle Kremer<sup>3,4</sup>, Harmjan R. Vos<sup>5</sup>, Manon M.H. Huibers<sup>6</sup>, Jody J. Haigh<sup>7</sup>, Danny Huylebroeck<sup>8,9</sup>, Reinier A. Boon<sup>3,10,11</sup> Mauro Giacca<sup>12</sup>, Eva van Rooij<sup>1,2\*</sup>

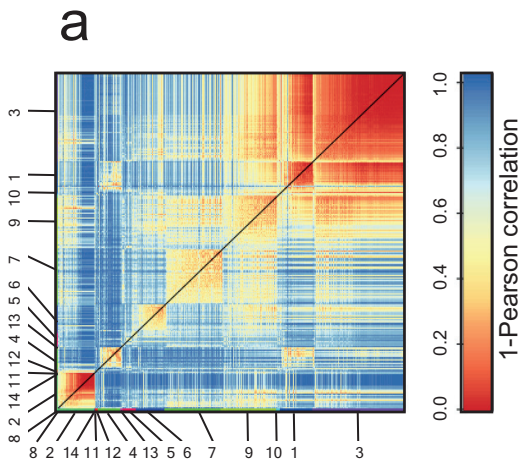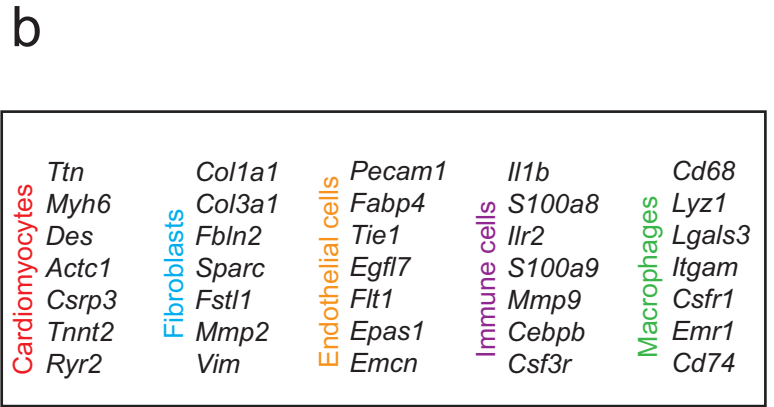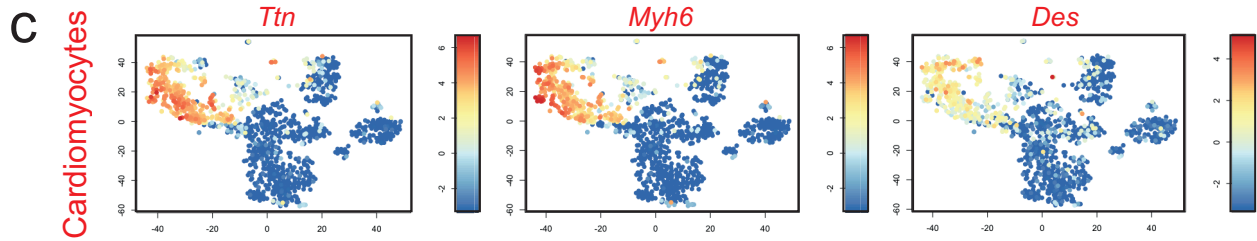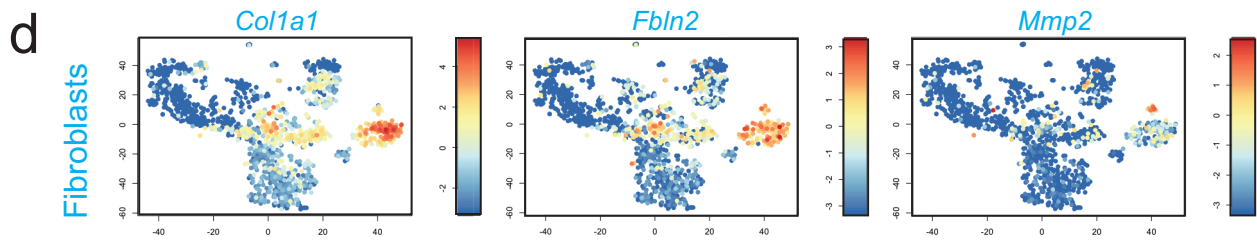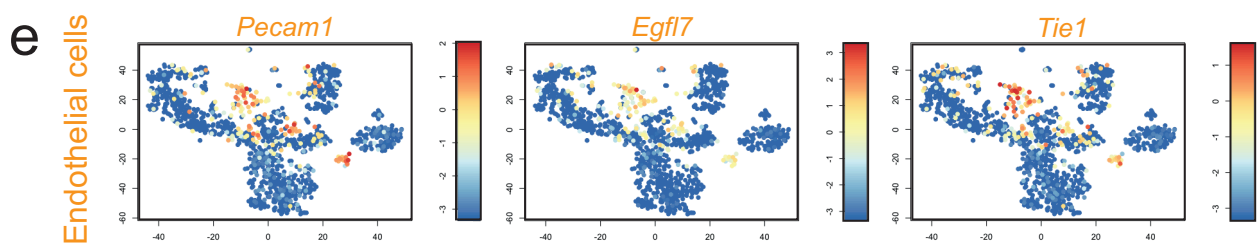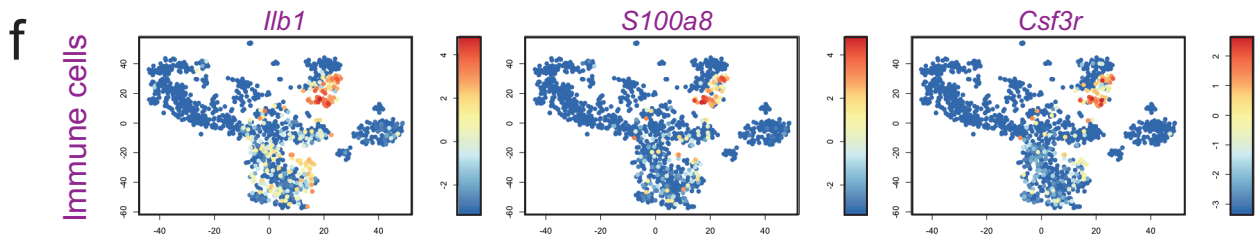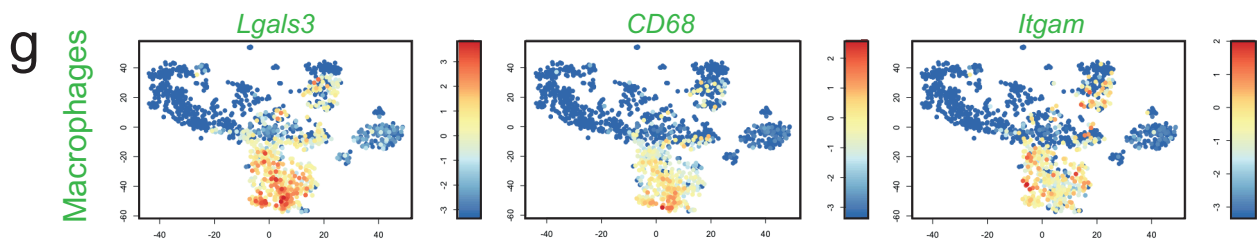

**Supplementary Figure 1. Clustering of cardiac cells based on gene expression differences.** **a** Heatmap showing distances in cell-to-cell transcriptomes of cells obtained from sham and 3 dpMI hearts. Distances are measured by 1-Pearson's correlation coefficient. K-medoids clustering identified 14 different cell clusters depicted on the x and y axes of the heatmap. **b** Table showing a list of known marker genes of main cardiac cell types used to identify the subpopulations of cells identified in **Fig. 1c**. **c-g** t-SNE maps indicating the expression of selected, well-established cellular markers in cell populations identified as **c** cardiomyocytes, **d** fibroblasts, **e** endothelial cells, **f** Immune cells, **g** macrophages. Data are shown as normalized transcript counts on a color-coded logarithmic scale. T-SNE indicates t-distributed stochastic neighbor embedding.

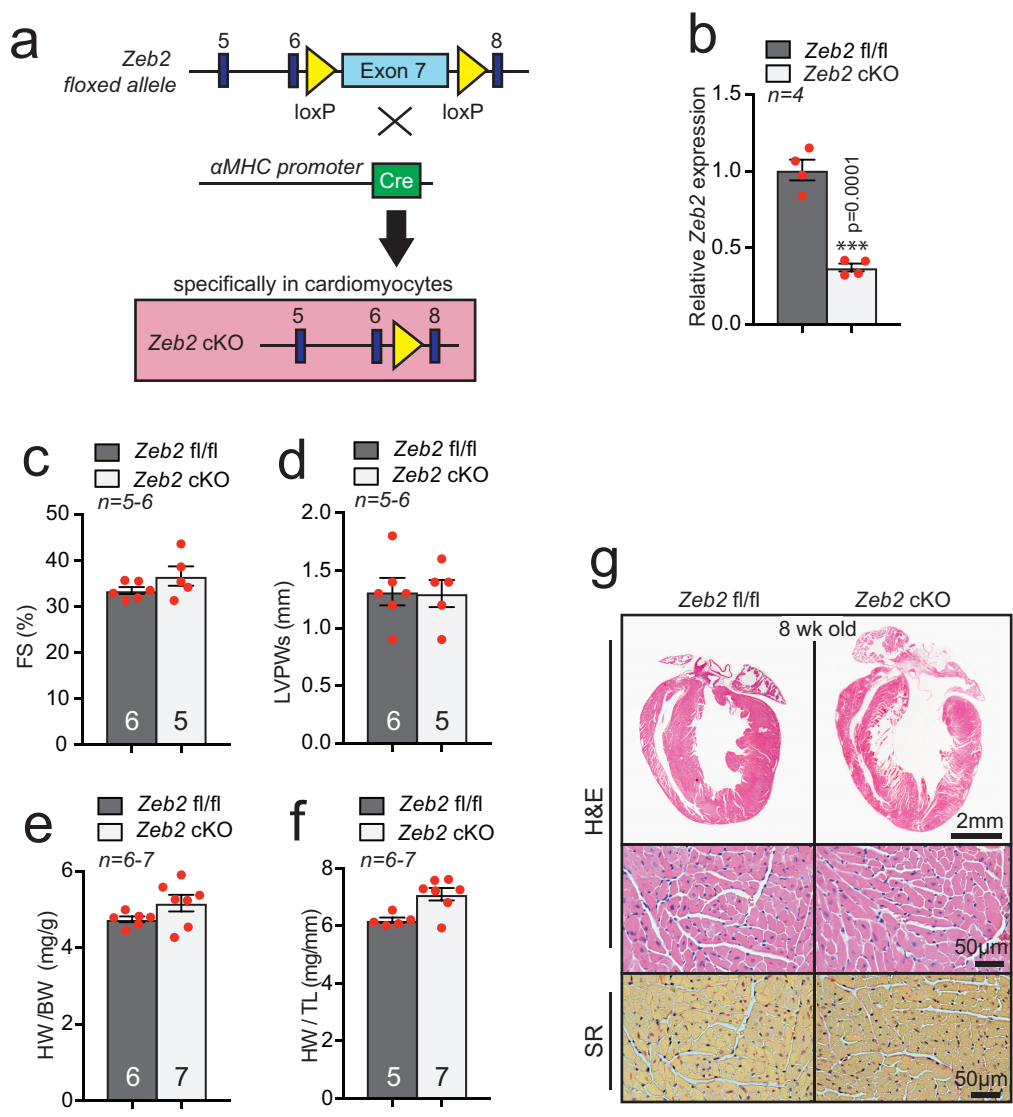

**Supplementary Figure 2. Generation of a cardiomyocyte-specific Zeb2 cKO mouse model.** **a** Schematic representation of generation of the Zeb2 cardiac KO (cKO). **b** mRNA expression level of Zeb2 in hearts from Zeb2 fl/fl and Zeb2 cKO mice. **c-d** Quantification of **c** fractional shortening (FS) and **d** left ventricular internal diameter in systole (LVIDs) from adult Zeb2 fl/fl and Zeb2 cKO mice. **e-f** Quantification of **e** HW/BW and **f** HW/TL ratio in Zeb2 fl/fl and Zeb2 cKO mice. **g** Representative images of four-chamber view (top panel), H&E stained sections (second panel) and SR stained sections (third panel) of hearts collected from adult Zeb2 fl/fl and Zeb2 cKO mice. H&E indicates Hematoxylin and Eosin, SR indicates Sirius Red, HW/BW indicates heart weight to body weight ratio, HW/TL indicates heart weight to tibia length ratio. Data are represented as mean  $\pm$  SEM, \*\*\*p<0.0001 each dot indicates a biological replicate, n is indicated in figures. Comparison of two groups was performed with the unpaired, two-tailed Student's t-test between Zeb2 cKO vs Zeb2 fl/fl (**b, c, d, e, f**) Source data are provided as a Source Data file.

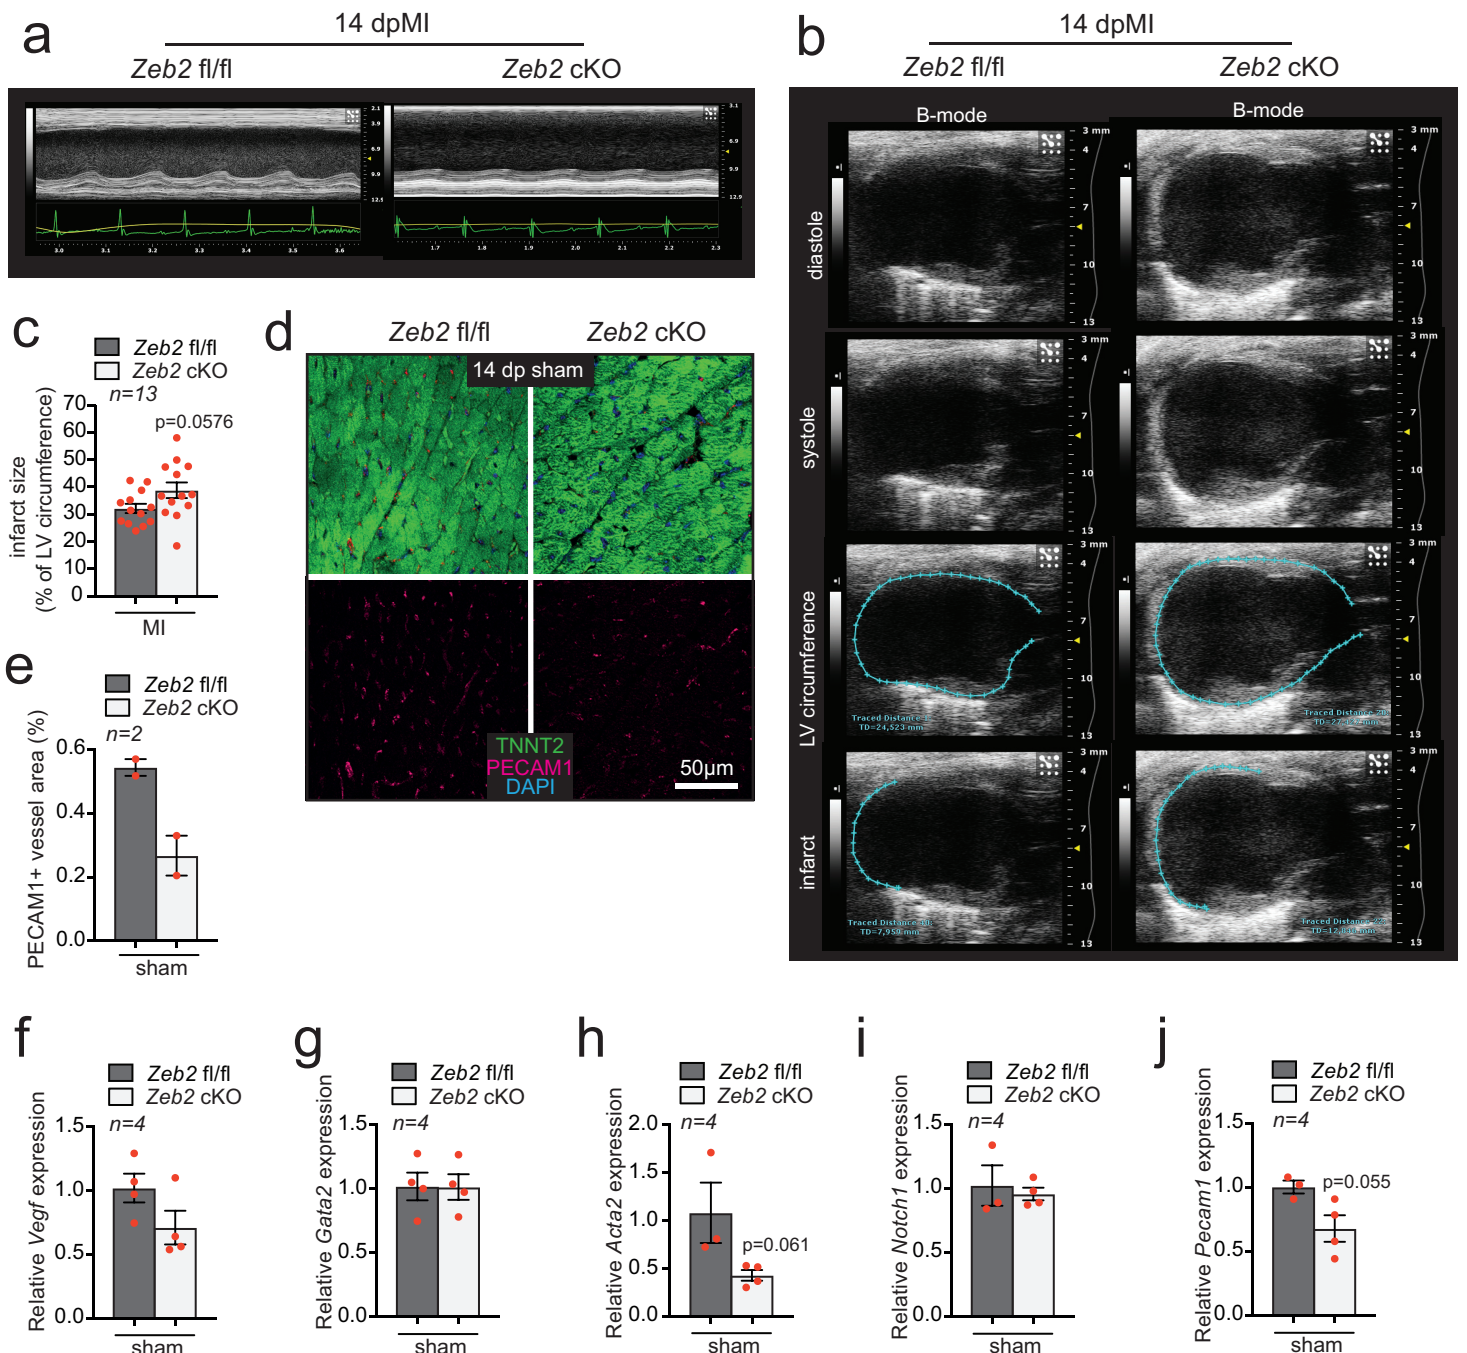

**Supplementary Figure 3. Cardiomyocytes-specific ZEB2 deletion impairs cardiac function after injury.** **a** Echocardiographic images of m-mode in hearts from Zeb2 fl/fl and Zeb2 cKO mice subjected to MI for 14 days. **b** Representative b-mode images of long access view in diastole and systole indicating infarcted region by measurements of percentage of LV circumference and **c** its quantification. **d** Immunofluorescence for PECAM1, TNNT2 and DAPI in Zeb2 fl/fl and Zeb2 cKO sham hearts **e** quantification of PECAM1 positive blood vessel area in histological sections from (**d**). Data in **d-e** from n=2. **f-j** mRNA expression levels of **f** Vegf and **g** Gata2 **h** Acta2 **i** Notch1 **j** Pecam1 in Zeb2 fl/fl and Zeb2 cKO sham mice. Data are represented as mean  $\pm$  SEM, each dot indicates a biological replicate, n is indicated in figures. Comparison of two groups was performed with the unpaired, two-tailed Student's t-test between Zeb2 cKO vs Zeb2 fl/fl post-MI (**c**) or post-sham (**f**, **g**, **h**, **i**, **j**). Source data are provided as a Source Data file.

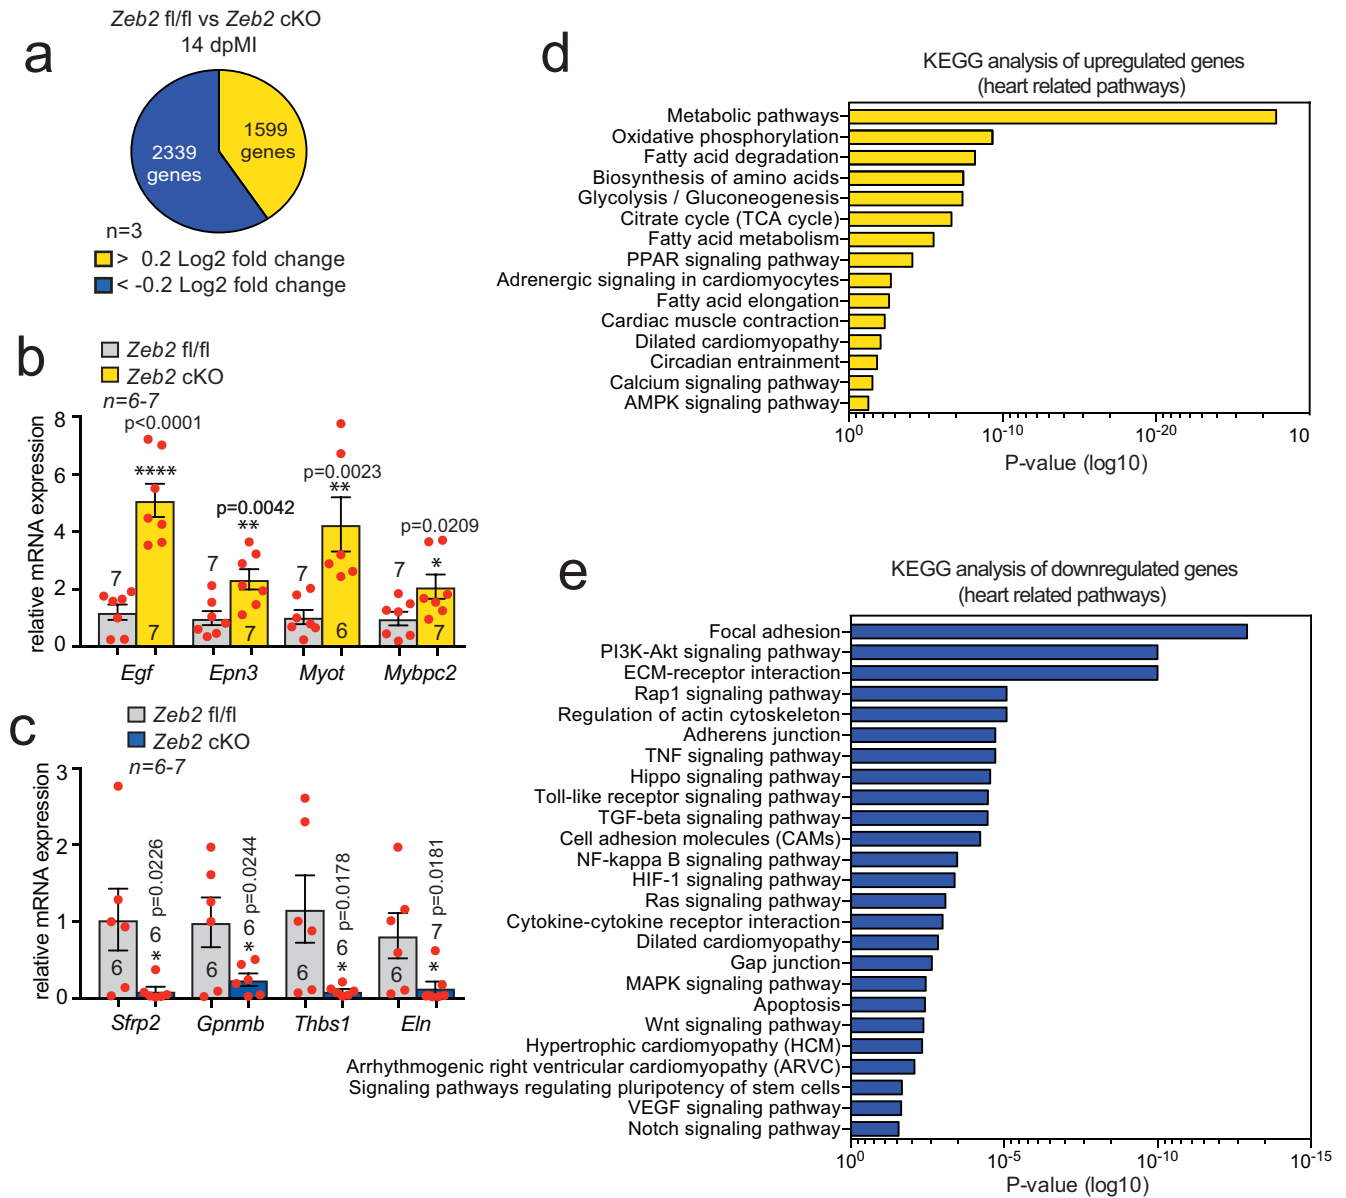

**Supplementary Figure 4. RNA-seq to identify the role of ZEB2 in the injured heart.** **a** Representation of the RNA-seq dataset as pie diagram showing down- and upregulated genes in Zeb2 fl/fl and Zeb2 cKO heart tissue 14 dpMI. **b-c** mRNA expression levels of **b** upregulated and **c** downregulated genes. **d-e** KEGG pathway analysis on genes significantly **d** upregulated and **e** downregulated in Zeb2 cKO hearts when compared to Zeb2 fl/fl hearts post injury. Data are represented as mean  $\pm$  SEM, \* $p < 0.05$ , \*\* $p < 0.01$ , \*\*\*\* $p < 0.0001$ , each dot indicates a biological replicate, n is indicated in figures. Comparison of two groups was performed with the unpaired, two-tailed Student's t-test between Zeb2 cKO vs Zeb2 fl/fl post-MI (**b, c**). Source data are provided as a Source Data file.

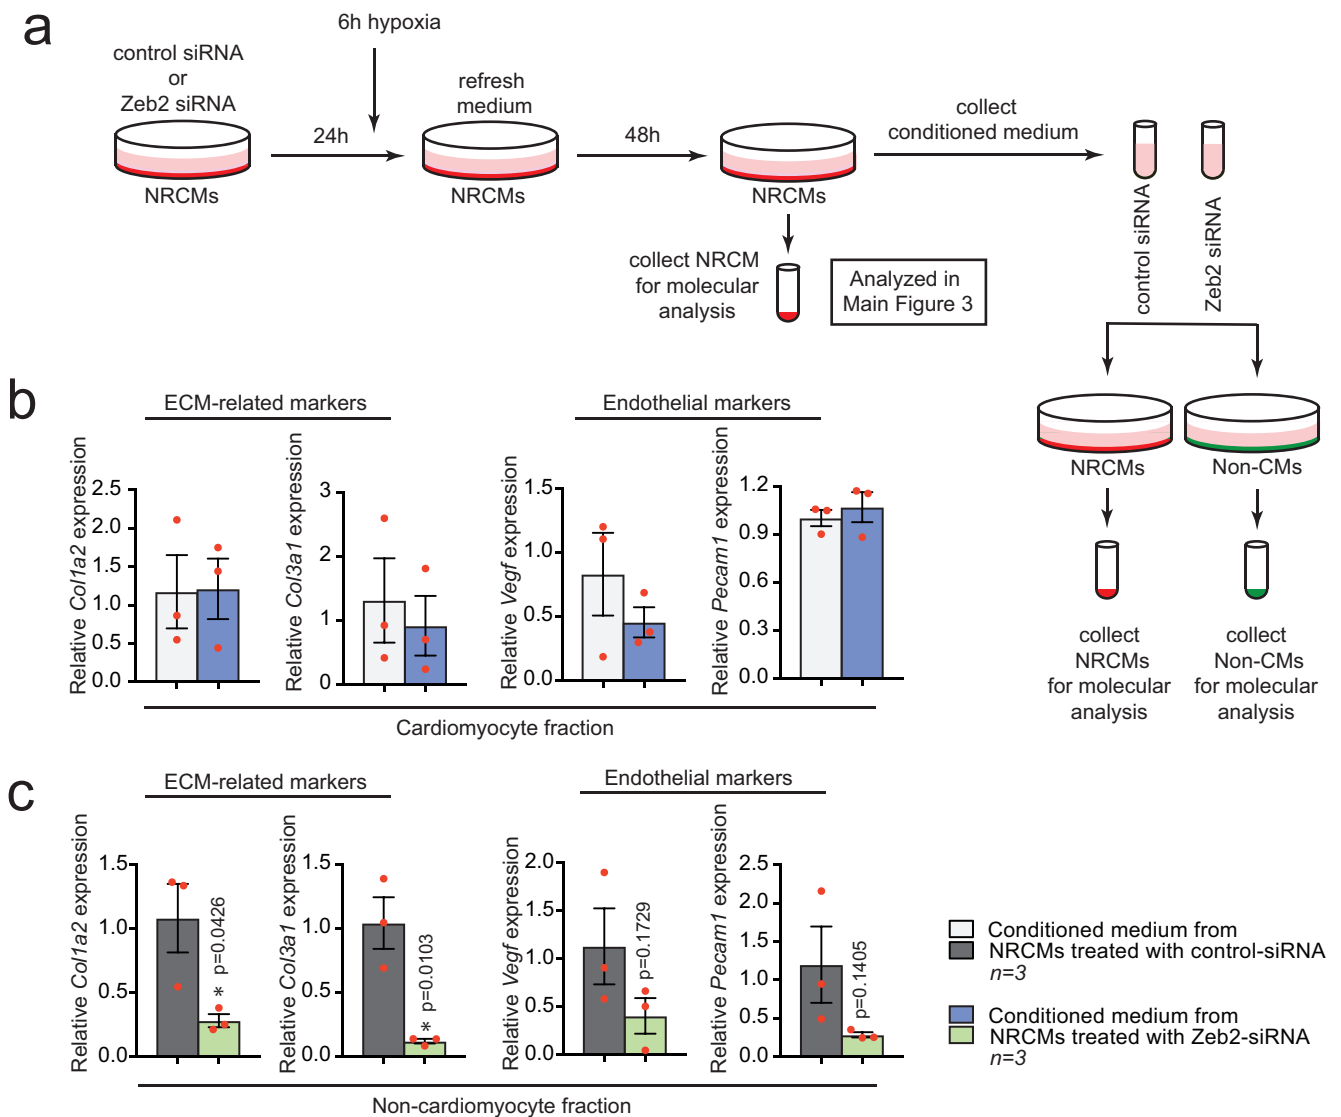

**Supplementary Figure 5. Cellular communication is ZEB2 dependent.** **a** Experimental setup to produce and collect conditioned medium from NRCMs treated with ZEB2 silencing RNA. **b-c** mRNA expression levels of fibroblast and endothelial markers in **b** NRCMs **c** non-cardiomyocytes treated with conditioned media collected in **(a)**. Data are represented as mean  $\pm$  SEM, \* $p < 0.05$ , each dot indicates a biological replicate, n is indicated in figures. Comparison of two groups was performed with the unpaired, two-tailed Student's t-test (**b, c**). Source data are provided as a Source Data file.

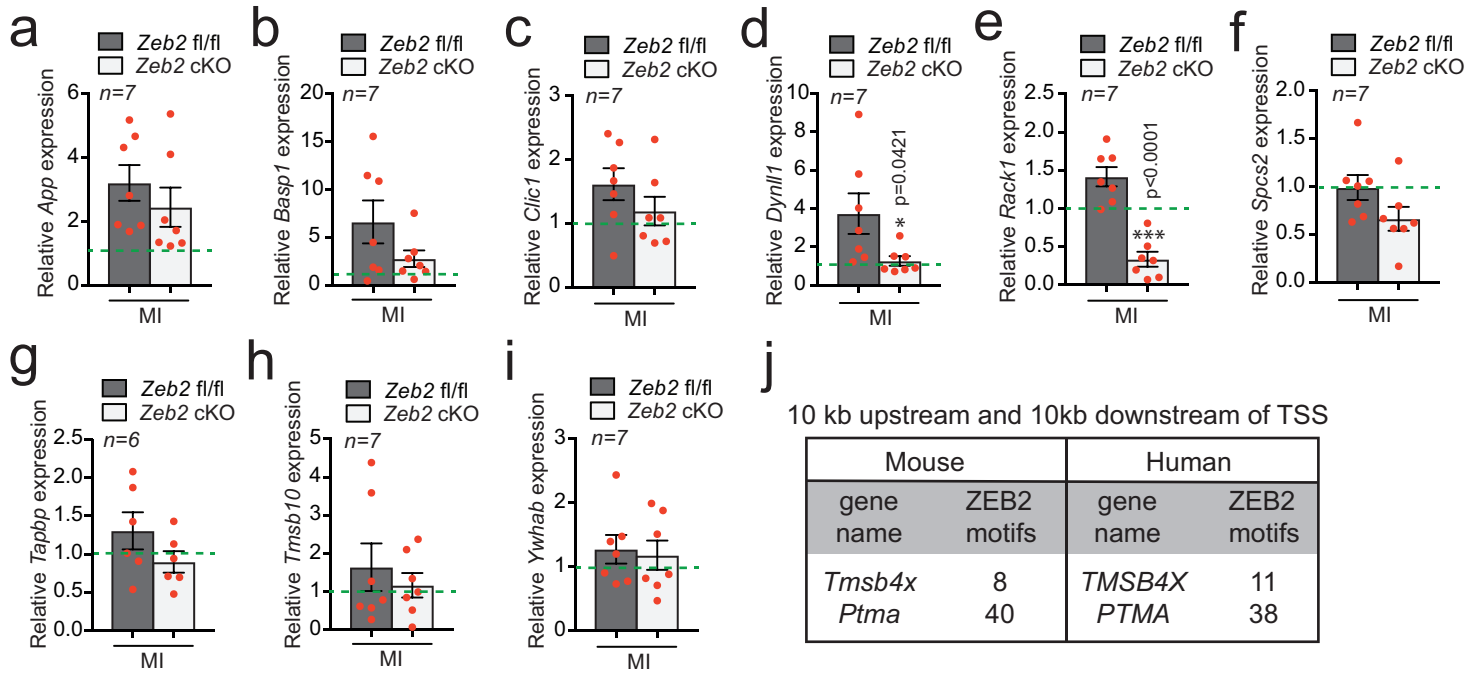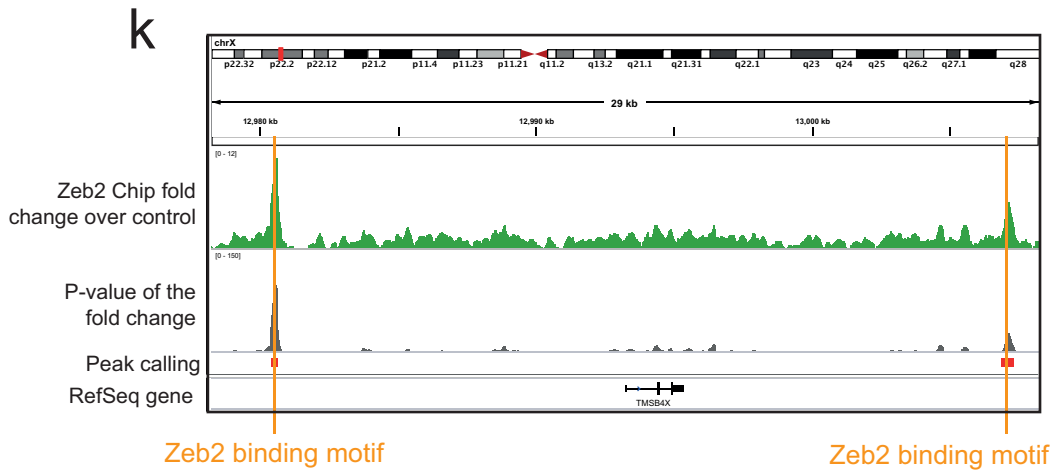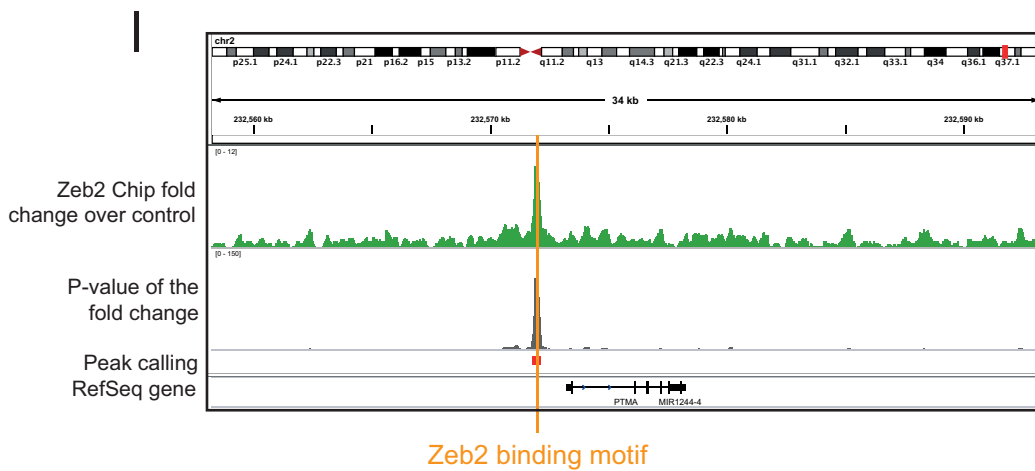



**Supplementary Figure 6. Validation of factors identified by mass spectrometry in vivo. a-i** mRNA expression levels of **a** App, **b** Basp1, **c** Clic1, **d** Dynll1, **e** Rack1, **f** Spcs2, **g** Tapbp, **h** Tmsb10, **i** Ywhab in hearts from Zeb2 fl/fl and Zeb2 cKO mice. **j** ZEB2 predicted binding sites in 10kb upstream and 10kb downstream region of the transcription starting site (TSS) of Tmsb4 and Ptma in mouse and human. **k-l** ZEB2 protein directly binds to **k** TMSB4 and **l** PTMA promoters. Green dashed line indicates sham Zeb2 fl/fl control. Orange line denotes ZEB2 binding motifs. Data are represented as mean  $\pm$  SEM, \* $p < 0.05$ , \*\*\* $p < 0.001$ , each dot indicates a biological replicate, n is indicated in figures. Comparison of two groups was performed with the unpaired, two-tailed Student's t-test between Zeb2 cKO vs Zeb2 fl/fl groups post-MI (**a, b, c, d, e, f, g, h, i**). Source data are provided as a Source Data file.

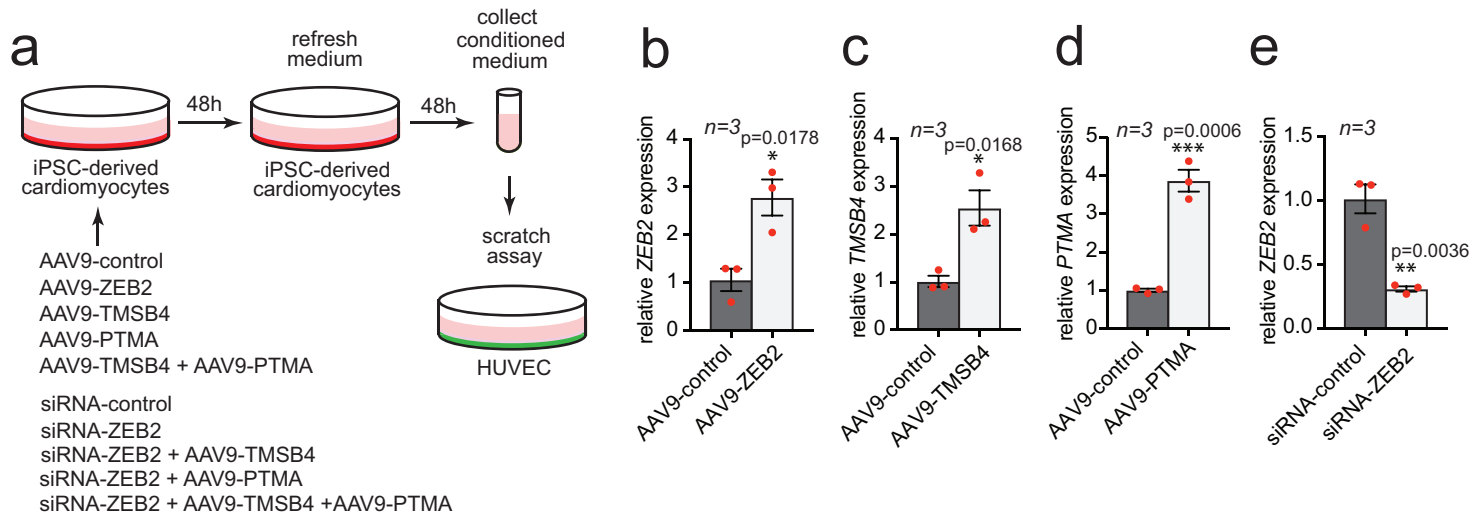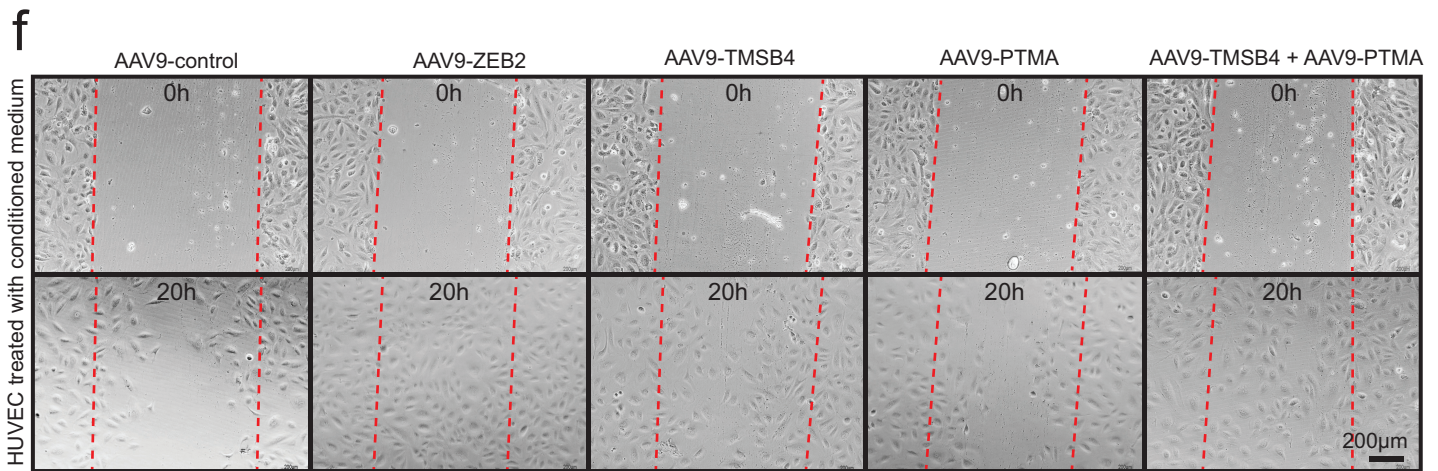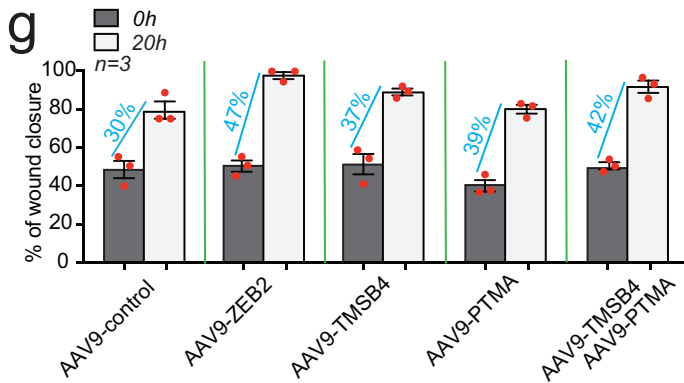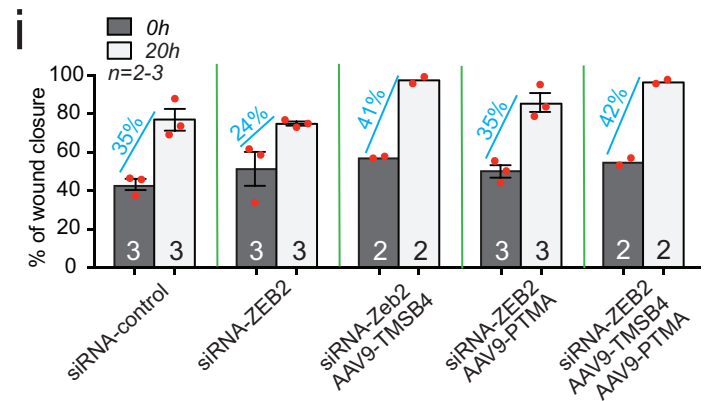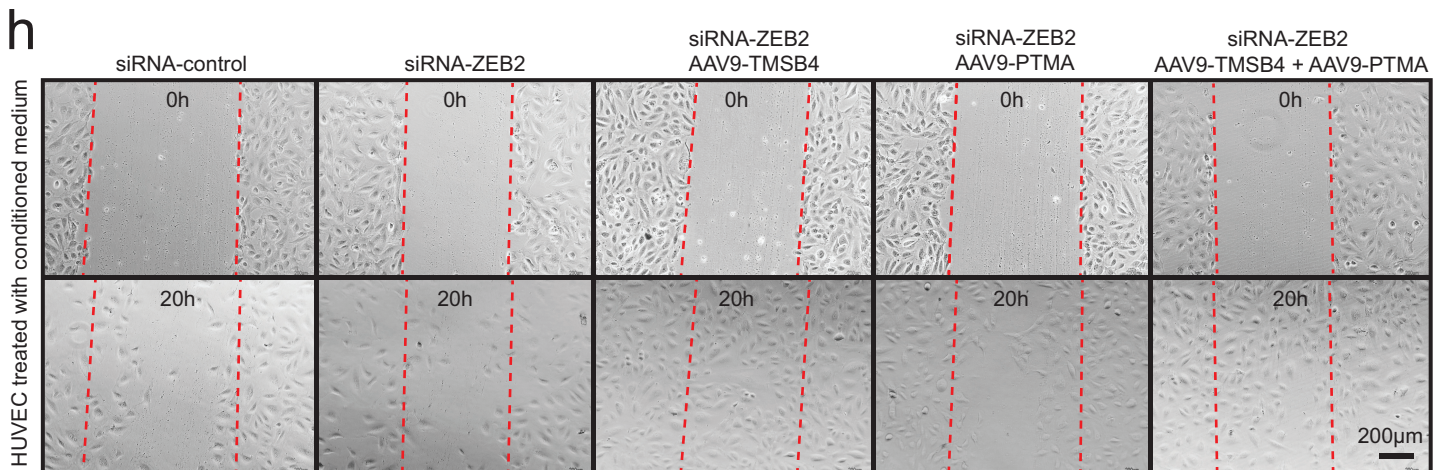

**Supplementary Figure 7. Expression of ZEB2, TMSB4 and PTMA in cardiomyocytes drives endothelial cell migration.** **a** Conditioned medium experimental setup. **b-e** mRNA expression levels of **(b)**, **e** ZEB2, **c** TMSB4 **d** PTMA in iPSC-derived cardiomyocytes treated with AAV9-control, AAV9-ZEB2, AAV9-TMSB4, AAV9-PTMA or siRNA-control and siRNA ZEB2, respectively **f** Representative images of scratch assay in HUVECs treated with indicated conditioned medium at 0 and 20 hours after treatment. **g** Quantification of wound closure from **(f)**. **h** Representative images of scratch assay in HUVECs treated with the indicated conditioned media at 0 and 20 hours after treatment. **i** Quantification of wound closure from **(h)**. Data in **f-h** is from one experiment with 2-3 biological replicates. Data are represented as mean  $\pm$  SEM, \* $p < 0.05$ , \*\*\* $p < 0.001$ , each dot indicates a biological replicate, n is indicated in figures. Comparison of two groups was performed with the unpaired, two-tailed Student's t-test **(b, c, d, e)**. Source data are provided as a Source Data file.

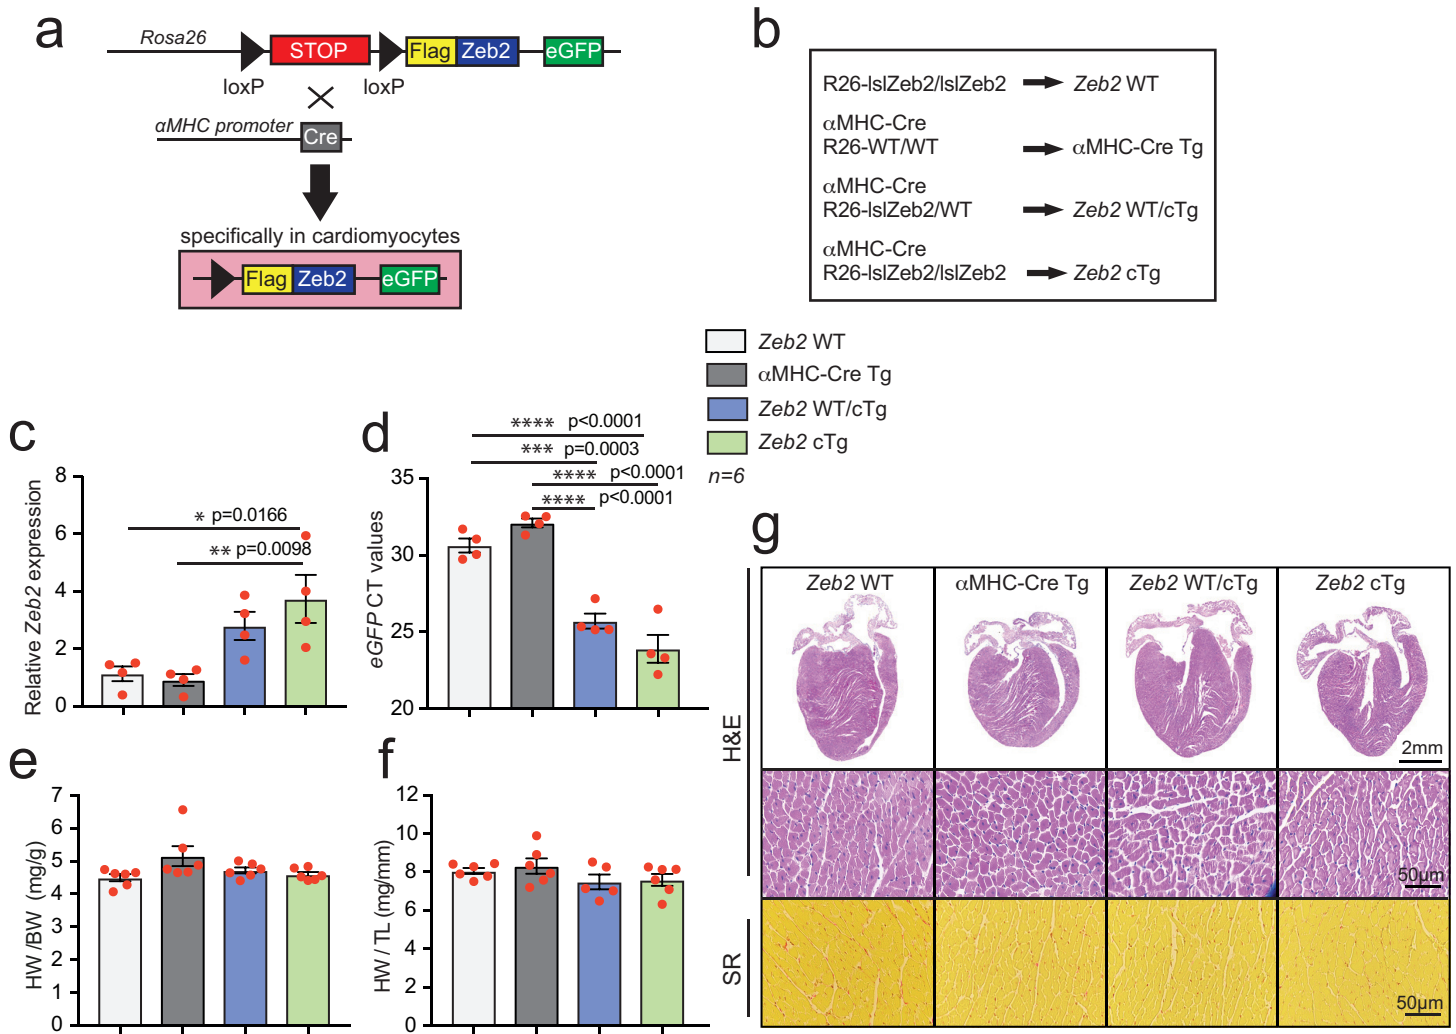

**Supplementary Figure 8. Generation of a cardiomyocyte-specific *Zeb2* cTg mouse model.** **a** Schematic representation of generation of the ZEB2 cardiac overexpression model (*Zeb2* cTg). **b** Detailed description of the used genotypes and their simplified names. **c-d** mRNA expression levels of **c** *Zeb2* and **d** eGFP (CT values) in hearts from *Zeb2* WT and *Zeb2* cTg mice. **e-f** Quantification of **e** HW/BW and **f** HW/TL ratio in *Zeb2* WT and *Zeb2* cTg mice. **g** Representative images of four-chamber view (top panel), H&E stained sections (second panel) and SR stained sections (third panel) of hearts collected from adult *Zeb2* WT and *Zeb2* cTg mice. H&E indicates Hematoxylin and Eosin, SR indicates Sirius Red, HW/BW indicates heart weight to body weight ratio, HW/TL indicates heart weight to tibia length ratio. Data are represented as mean  $\pm$  SEM, \* $p < 0.05$ , \*\* $p < 0.01$ , \*\*\* $p < 0.001$ , \*\*\*\* $p < 0.0001$ , each dot indicates a biological replicate,  $n$  is indicated in figures. Data were analysed by ordinary one-way ANOVA with Tukey multiple comparison test (**c**, **d**, **e**, **f**) Source data are provided as a Source Data file.

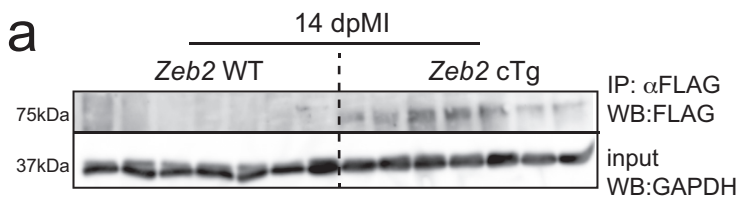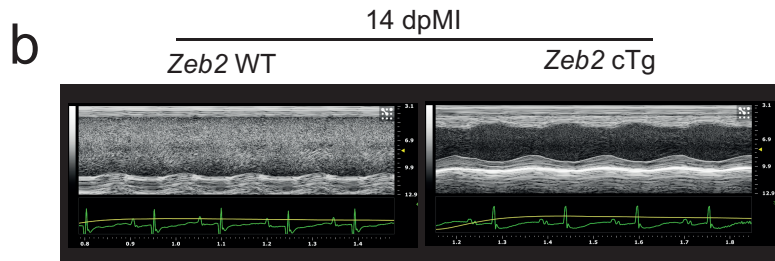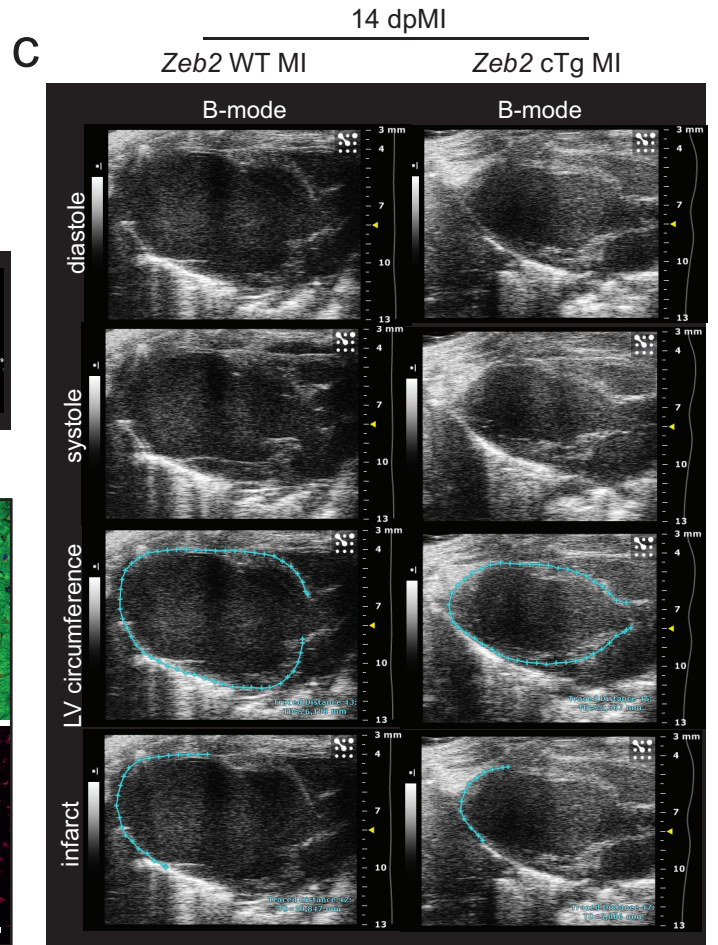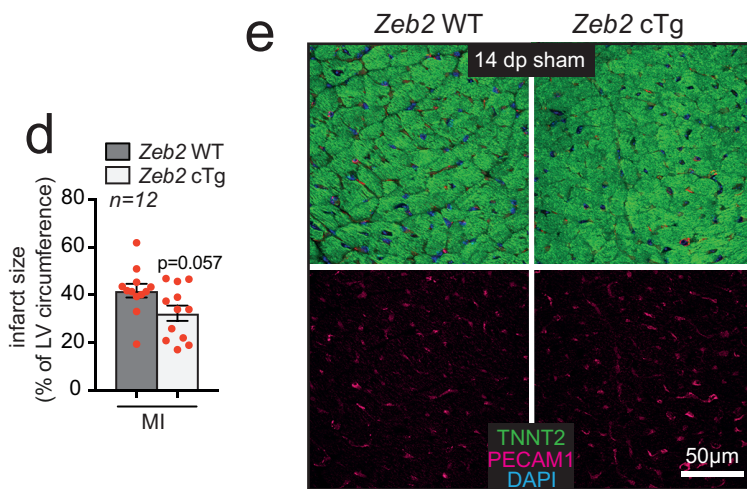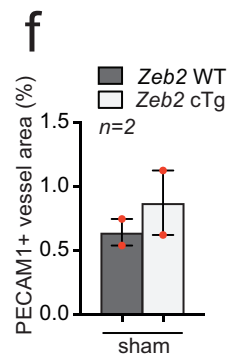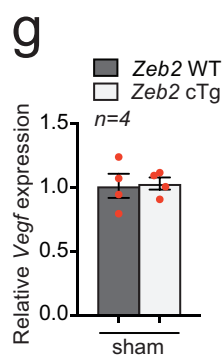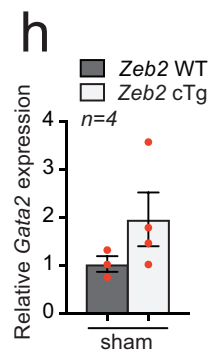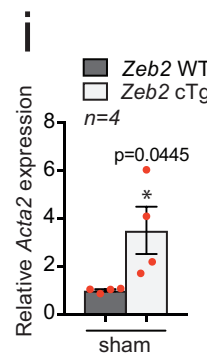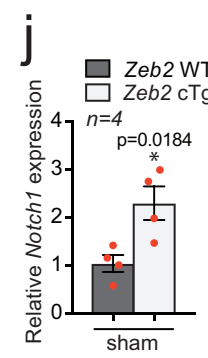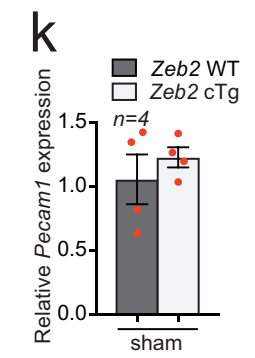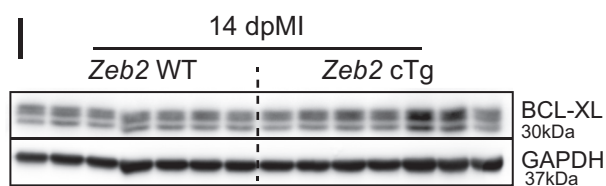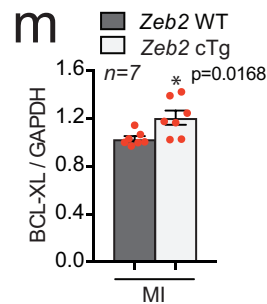

**Supplementary Figure 9. Cardiomyocyte-specific ZEB2 overexpression protects cardiac function after MI.** **a** FLAG immunoprecipitation in heart tissue from Zeb2 WT and Zeb2 cTg 14 dpMI. **b** Echocardiographic images of m-mode in hearts from Zeb2 WT and Zeb2 cTg mice subjected to MI for 14 days. **c** Representative b-mode images of long access view in diastole and systole indicating infarcted region by measurements of percentage of LV circumference and **d** its quantification. **e** Immunofluorescence for PECAM1, TNNT2 and DAPI in Zeb2 WT and Zeb2 cTg sham hearts **f** quantification of PECAM1 positive blood vessel area in histological sections from (**e**). Data in **e-f** from n=2. **g-k** mRNA expression levels of **g** Vegf and **h** Gata2 **i** Acta2 **j** Notch1 **k** Pecam1 in Zeb2 WT and Zeb2 cTg sham mice. **l** Representative WB for BCL-XL in tissue from Zeb2 WT and Zeb2 cTg 14 dpMI and **m** its quantification. Data are represented as mean  $\pm$  SEM, \*p<0.05, each dot indicates a biological replicate, n is indicated in figures. Comparison of two groups was performed with the unpaired, two-tailed Student's t-test between Zeb2cTg vs Zeb2 WT post-MI (**d, m**) or post-sham (**f, g, h, i, j, k**). Source data are provided as a Source Data file.

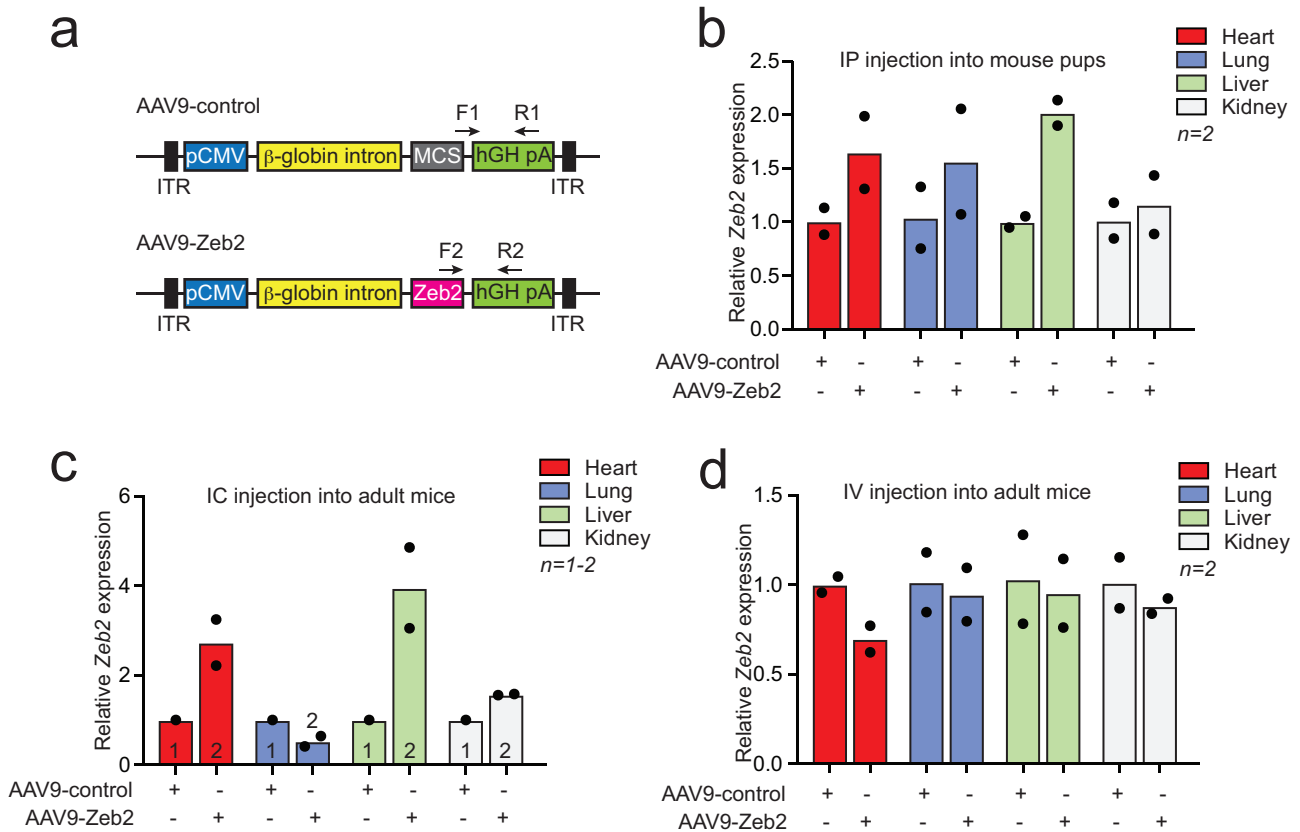

**Supplementary Figure 10. Efficiency of AAV9-Zeb2 delivery in vivo.** **a** Schematic representation of constructs used to generate AAV9 viruses. **b-d** mRNA expression level of Zeb2 in the indicated organs of **b** intraperitoneal (IP), **c** intracardiac (IC) and **d** intravenous (IV) AAV9-Zeb2-injected mice. Data are represented as mean  $\pm$  SEM, each dot indicates a biological replicate, n is indicated in figures. Source data are provided as a Source Data file.

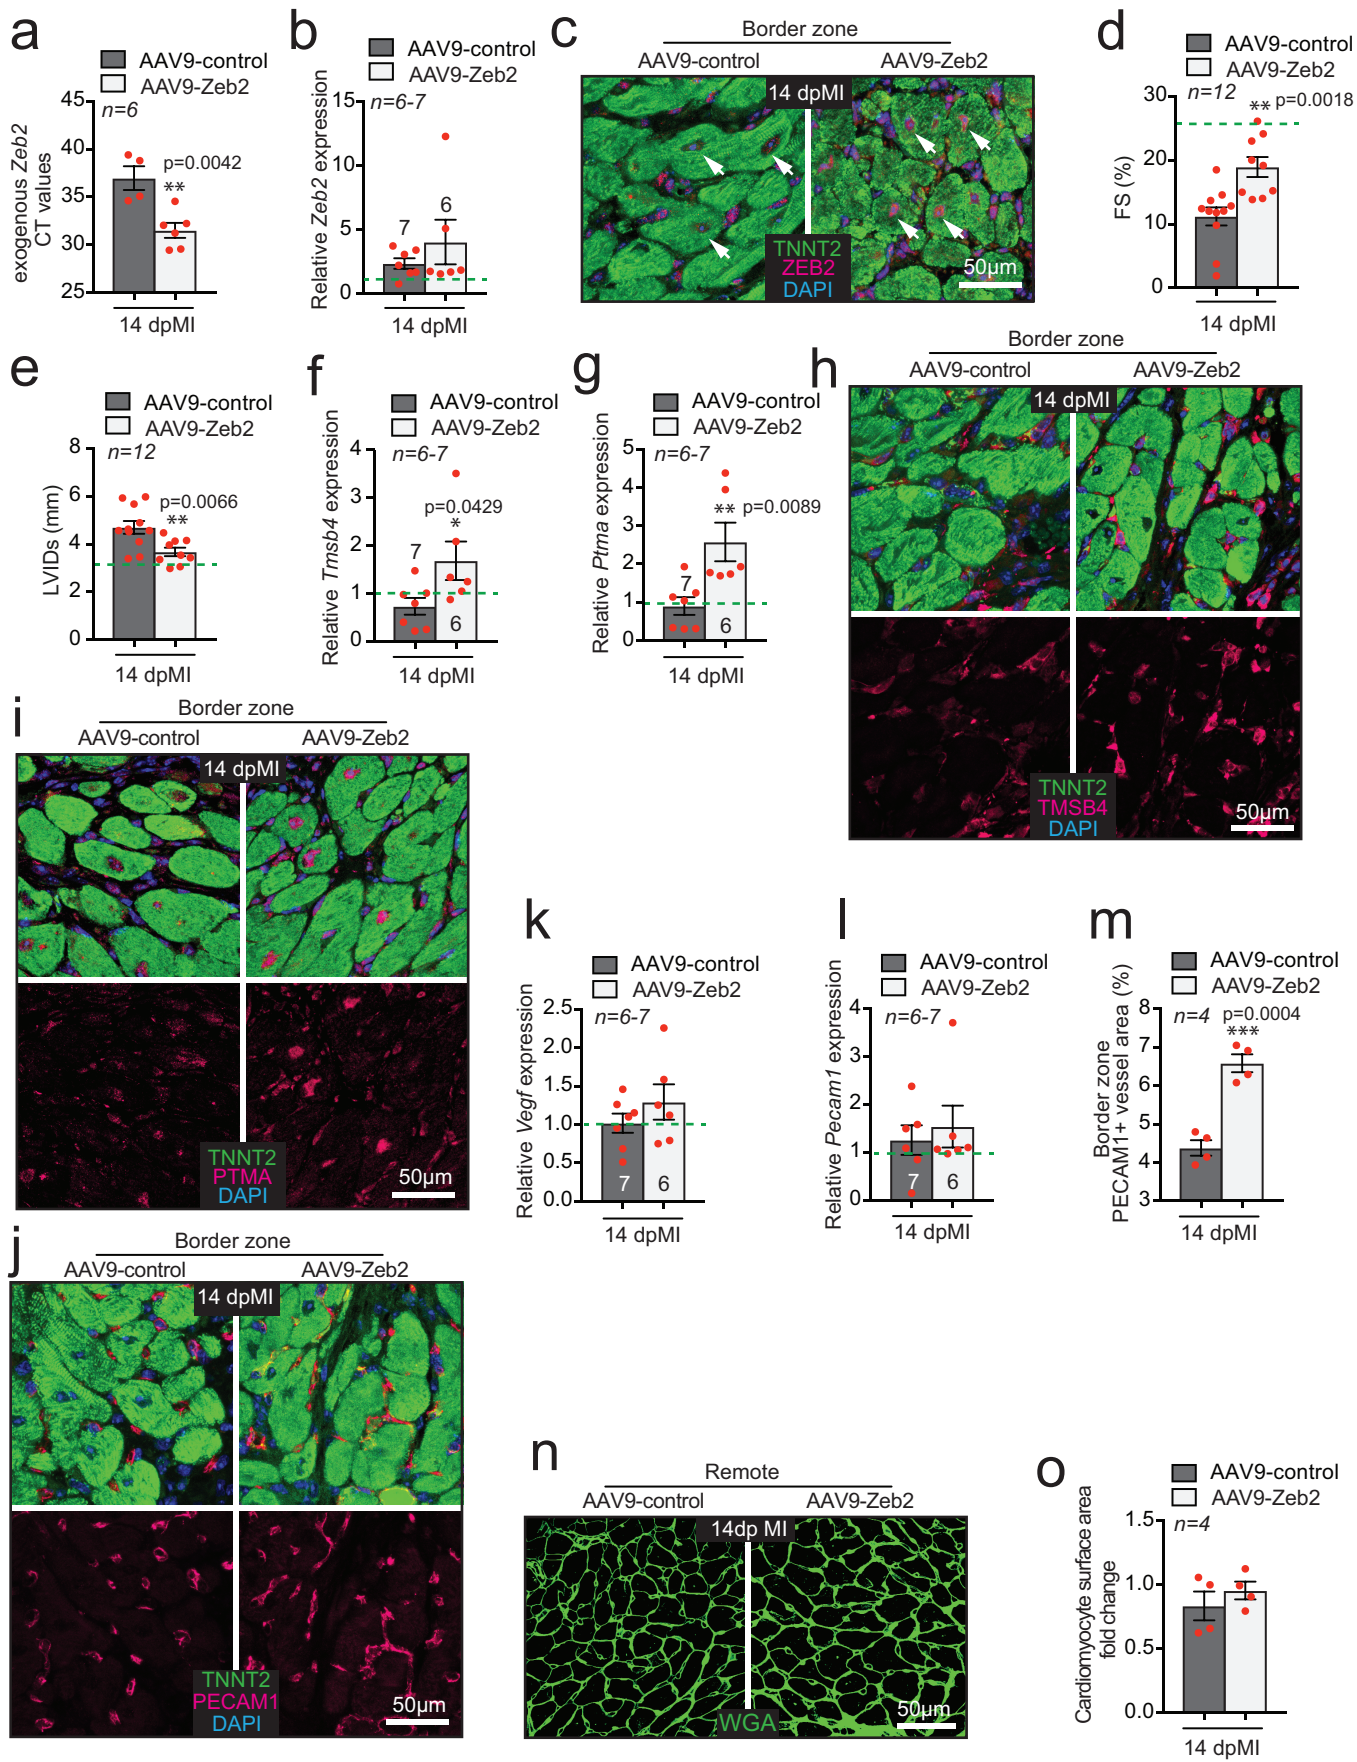



**Supplementary Figure 11. AAV9-mediated ZEB2 delivery is cardioprotective.** **a-b** Expression levels of **a** exogenous Zeb2 and **b** Zeb2 mRNA in AAV9-control and AAV9-Zeb2 treated mice 14 days post-surgery. **c** Immunohistochemistry for ZEB2, TNNT2 and DAPI nuclei of histological sections of hearts from AAV9-control and AAV9-Zeb2 treated mice 14 dpMI (border zone). **d-e** Quantification of **d** fractional shortening (FS) and **e** left ventricular internal diameter in systole (LVIDs) from AAV9-control and AAV9-Zeb2 treated mice 14 dpMI. **f-g** mRNA expression levels of **f** Tmsb4 and **g** Ptma in hearts from AAV9-control and AAV9-Zeb2 treated mice 14 days post-MI. **h-i** Immunofluorescence for **h** TMSB4 or **i** PTMA, ACTN2 and DAPI nuclei of histological sections of hearts from AAV9-control and AAV9-Zeb2 treated mice 14 dpMI. **j** Immunofluorescence for PECAM1, TNNT2 and DAPI nuclei of histological sections of hearts from AAV9-control and AAV9-Zeb2 treated mice 14 dpMI. **k-l** mRNA expression level of **k** Vegf and **l** Pecam1 in hearts from AAV9-control and AAV9-Zeb2 treated mice 14 dpMI. **m** Quantification of PECAM1 positive blood vessel area in histological sections of hearts from AAV9-control and AAV9-Zeb2 treated mice 14 dpMI. **n** WGA staining to measure cardiomyocyte surface area and **o** its quantification. Green dashed line indicates sham AAV9-control. White arrows show ZEB2 positive cardiomyocytes. Data are represented as mean  $\pm$  SEM, \* $p < 0.05$ , \*\* $p < 0.01$ , \*\*\* $p < 0.001$ , each dot indicates a biological replicate, n is indicated in figures. Comparison of two groups was performed with the unpaired, two-tailed Student's t-test between AAV9-Zeb2 vs AAV9-control post-MI (**a, b, d, e, f, g, k, l, m, o**). Source data are provided as a Source Data file.

**Supplementary Table 1. Morphometric and echocardiographic characteristic of Zeb2 fl/fl and Zeb2 cKO mice.**

|                   | <i>Zeb2</i> fl/fl | <i>Zeb2</i> cKO |
|-------------------|-------------------|-----------------|
| <b>n</b>          | 6                 | 6               |
| <b>BW (g)</b>     | 20,8 ± 1,99       | 21,7 ± 2,28     |
| <b>HW (g)</b>     | 0,10 ± 0,01       | 0,11 ± 0,01     |
| <b>TL (mm)</b>    | 15,3 ± 0,53       | 15,7 ± 0,55     |
| <b>IVSd (mm)</b>  | 0,86 ± 0,13       | 0,94 ± 0,24     |
| <b>IVSs (mm)</b>  | 1,33 ± 0,12       | 1,42 ± 0,2      |
| <b>LVIDd (mm)</b> | 3,83 ± 0,13       | 3,94 ± 0,23     |
| <b>LVIDs (mm)</b> | 2,56 ± 0,16       | 2,6 ± 0,25      |
| <b>LVPWd (mm)</b> | 0,93 ± 0,17       | 0,9 ± 0,25      |
| <b>LVPWs (mm)</b> | 1,31 ± 0,29       | 1,3 ± 0,26      |
| <b>EF (%)</b>     | 62,8 ± 2,6        | 66,5 ± 5,4      |
| <b>FS (%)</b>     | 33,4 ± 1,8        | 36,6 ± 4,6      |
| <b>Heart rate</b> | 435 ± 24          | 436 ± 25        |

BW, body weight; HW, heart weight; TL, tibia length; IVSd, interventricular septal thickness at end-diastole; IVSs, interventricular septal thickness at end-systole; LVIDd, left ventricular internal dimension at end-diastole; LVIDs, left ventricular internal dimension at end-systole; LVPWd, left ventricular posterior wall thickness at end-diastole; LVPWs, left ventricular posterior wall thickness at end-systole; EF, ejection fraction; FS, fractional shortening; Data are expressed as means ± STDEV. Comparison of two groups was performed with the unpaired, two-tailed Student's t-test between Zeb2 cKO vs Zeb2 fl/fl.

**Supplementary Table 2. Morphometric and echocardiographic characteristic of Zeb2 fl/fl and Zeb2 cKO mice subjected to sham or MI for 14 days.**

|                   | Zeb2 fl/fl                | Zeb2 cKO               |
|-------------------|---------------------------|------------------------|
| <b>Surgery</b>    | sham                      | sham                   |
| <b>n</b>          | 6                         | 7                      |
| <b>BW (g)</b>     | 26,1 ± 2,47               | 28 ± 1,22              |
| <b>HW (g)</b>     | 0,13 ± 0,01               | 0,13 ± 0,01            |
| <b>TL (mm)</b>    | 16,3 ± 0,63               | 16,7 ± 0,35            |
| <b>IVSd (mm)</b>  | 1,71 ± 0,55               | 1,33 ± 0,35            |
| <b>IVSs (mm)</b>  | 2,17 ± 0,49               | 1,79 ± 0,42            |
| <b>LVIDd (mm)</b> | 3,78 ± 0,52               | 4,08 ± 0,54            |
| <b>LVIDs (mm)</b> | 2,58 ± 0,62               | 2,9 ± 0,71             |
| <b>LVPWd (mm)</b> | 1,22 ± 0,28               | 1,1 ± 0,13             |
| <b>LVPWs (mm)</b> | 1,74 ± 0,35               | 1,39 ± 0,29            |
| <b>EF (%)</b>     | 61,6 ± 10,3               | 59,9 ± 11,6            |
| <b>FS (%)</b>     | 33,1 ± 7,3                | 32,1 ± 7,9             |
| <b>Heart rate</b> | 411 ± 44                  | 407 ± 29               |
|                   | Zeb2 fl/fl                | Zeb2 cKO               |
| <b>Surgery</b>    | MI                        | MI                     |
| <b>n</b>          | 10                        | 11                     |
| <b>BW (g)</b>     | 28,9 ± 1,65               | 28,4 ± 2,84            |
| <b>HW (g)</b>     | 0,17 ± 0,02               | 0,19 ± 0,04            |
| <b>TL (mm)</b>    | 16,7 ± 0,53               | 16,4 ± 0,54            |
| <b>IVSd (mm)</b>  | 1,26 ± 0,44               | 1,05 ± 0,27            |
| <b>IVSs (mm)</b>  | 1,60 ± 0,63               | 1,23 ± 0,35            |
| <b>LVIDd (mm)</b> | 5,10 ± 0,89 \$\$ p=0.0094 | 5,41 ± 0,65            |
| <b>LVIDs (mm)</b> | 4,05 ± 1,09 \$ p=0.0227   | 4,62 ± 0,84            |
| <b>LVPWd (mm)</b> | 1,31 ± 0,44               | 1,15 ± 0,47            |
| <b>LVPWs (mm)</b> | 1,54 ± 0,39               | 1,37 ± 0,57            |
| <b>EF (%)</b>     | 44,7 ± 13,6               | 32,7 ± 14,5 # p=0.0450 |
| <b>FS (%)</b>     | 23,5 ± 8,4 \$ p=0.0382    | 16,1 ± 7,6 # p=0.0238  |
| <b>Heart rate</b> | 415 ± 42                  | 424 ± 28               |

sham, sham-operated control group; MI, myocardial infarction; BW, body weight; HW, heart weight; TL, tibia length; IVSd, interventricular septal thickness at end-diastole; IVSs, interventricular septal thickness at end-systole; LVIDd, left ventricular internal dimension at end-diastole; LVIDs, left ventricular internal dimension at end-systole; LVPWd, left ventricular posterior wall thickness at end-diastole; LVPWs, left ventricular posterior wall thickness at end-systole; EF, ejection fraction; FS, fractional shortening; Data are expressed as means ± STDEV. Comparison of two groups was performed with the unpaired, two-tailed Student's t-test between Zeb2 fl/fl post-MI vs Zeb2 fl/fl post-sham (indicated by dollar sign, \$p<0.05, \$\$p<0.01) and Zeb2 cKO post-MI vs Zeb2 fl/fl post-MI (indicated by pound sign, #p<0.05).

**Supplementary Table 3. Morphometric and echocardiographic characteristic of Zeb2 WT,  $\alpha$ MHC-Cre Tg, Zeb2 WT/cTg and Zeb2 cTg mice.**

|                   | Zeb2 WT          | $\alpha$ MHC-Cre Tg | Zeb2 WT/cTg      | Zeb2 cTg         |
|-------------------|------------------|---------------------|------------------|------------------|
| <b>n</b>          | 6                | 6                   | 6                | 6                |
| <b>BW (g)</b>     | 31,4 $\pm$ 1,46  | 28,48 $\pm$ 1,36    | 28,45 $\pm$ 2,5  | 28,71 $\pm$ 2,47 |
| <b>HW (g)</b>     | 0,14 $\pm$ 0,01  | 0,15 $\pm$ 0,02     | 0,13 $\pm$ 0,01  | 0,13 $\pm$ 0,01  |
| <b>TL (mm)</b>    | 17,51 $\pm$ 0,37 | 17,61 $\pm$ 0,17    | 17,48 $\pm$ 0,44 | 17,41 $\pm$ 0,29 |
| <b>IVSd (mm)</b>  | 0,94 $\pm$ 0,1   | 0,98 $\pm$ 0,15     | 0,91 $\pm$ 0,05  | 0,84 $\pm$ 0,03  |
| <b>IVSs (mm)</b>  | 1,23 $\pm$ 0,11  | 1,31 $\pm$ 0,18     | 1,25 $\pm$ 0,11  | 1,72 $\pm$ 0,11  |
| <b>LVIDd (mm)</b> | 3,98 $\pm$ 0,27  | 4,06 $\pm$ 0,12     | 4,14 $\pm$ 0,20  | 4,10 $\pm$ 0,36  |
| <b>LVIDs (mm)</b> | 2,79 $\pm$ 0,41  | 3,01 $\pm$ 0,38     | 3,03 $\pm$ 0,25  | 2,91 $\pm$ 0,39  |
| <b>LVPWd (mm)</b> | 0,96 $\pm$ 0,08  | 1,15 $\pm$ 0,3      | 0,93 $\pm$ 0,22  | 1,01 $\pm$ 0,17  |
| <b>LVPWs (mm)</b> | 1,24 $\pm$ 0,12  | 1,48 $\pm$ 0,42     | 1,21 $\pm$ 0,19  | 1,29 $\pm$ 0,21  |
| <b>EF (%)</b>     | 57,52 $\pm$ 8,88 | 50,91 $\pm$ 12,27   | 52,61 $\pm$ 8,29 | 56,30 $\pm$ 7,09 |
| <b>FS (%)</b>     | 30,10 $\pm$ 6,07 | 26,08 $\pm$ 7,88    | 26,92 $\pm$ 5,35 | 29,21 $\pm$ 4,47 |
| <b>Heart rate</b> | 429 $\pm$ 32     | 416 $\pm$ 29        | 376 $\pm$ 19     | 368 $\pm$ 50     |

BW, body weight; HW, heart weight; TL, tibia length; IVSd, interventricular septal thickness at end-diastole; IVSs, interventricular septal thickness at end-systole; LVIDd, left ventricular internal dimension at end-diastole; LVIDs, left ventricular internal dimension at end-systole; LVPWd, left ventricular posterior wall thickness at end-diastole; LVPWs, left ventricular posterior wall thickness at end-systole; EF, ejection fraction; FS, fractional shortening; Data are expressed as means  $\pm$  STDEV. Data were analyzed by ordinary one-way ANOVA with Sidak's multiple comparison test.

**Supplementary Table 4. Morphometric and echocardiographic characteristic of Zeb2 WT and Zeb2 cTg mice subjected to MI for 14 days.**

|                   | Zeb2 WT                        | Zeb2 cTg                  |
|-------------------|--------------------------------|---------------------------|
| <b>Surgery</b>    | sham                           | sham                      |
| <b>n</b>          | 6                              | 6                         |
| <b>BW (g)</b>     | 30,2 ± 2,68                    | 30,34 ± 2,89              |
| <b>HW (g)</b>     | 0,14 ± 0,01                    | 0,15 ± 0,03               |
| <b>TL (mm)</b>    | 17,47 ± 0,38                   | 17,16 ± 0,42              |
| <b>IVSd (mm)</b>  | 0,77 ± 0,13                    | 0,81 ± 0,09               |
| <b>IVSs (mm)</b>  | 1,13 ± 0,14                    | 1,22 ± 0,14               |
| <b>LVIDd (mm)</b> | 3,79 ± 0,15                    | 3,99 ± 0,35               |
| <b>LVIDs (mm)</b> | 2,78 ± 0,17                    | 2,77 ± 0,46               |
| <b>LVPWd (mm)</b> | 0,94 ± 0,18                    | 0,79 ± 0,08               |
| <b>LVPWs (mm)</b> | 1,17 ± 0,2                     | 1,11 ± 0,17               |
| <b>EF (%)</b>     | 52,72 ± 6,03                   | 58,33 ± 11,82             |
| <b>FS (%)</b>     | 26,68 ± 3,85                   | 30,88 ± 8,03              |
| <b>Heart rate</b> | 403 ± 31                       | 342 ± 73                  |
|                   | Zeb2 WT                        | Zeb2 cTg                  |
| <b>Surgery</b>    | MI                             | MI                        |
| <b>n</b>          | 11                             | 11                        |
| <b>BW (g)</b>     | 29,89 ± 2,82                   | 30,48 ± 1,61              |
| <b>HW (g)</b>     | 0,18 ± 0,03                    | 0,16 ± 0,01               |
| <b>TL (mm)</b>    | 17,26 ± 0,55                   | 17,28 ± 0,44              |
| <b>IVSd (mm)</b>  | 0,67 ± 0,14                    | 0,76 ± 0,13               |
| <b>IVSs (mm)</b>  | 0,71 ± 0,14 \$\$\$\$ p<0.0001  | 0,94 ± 0,25 # p=0.0163    |
| <b>LVIDd (mm)</b> | 5,46 ± 0,83 \$\$\$ p=0.0002    | 4,75 ± 0,65 # p=0.0389    |
| <b>LVIDs (mm)</b> | 5,01 ± 0,91 \$\$\$\$ p<0.0001  | 3,86 ± 0,97 ## p=0.0093   |
| <b>LVPWd (mm)</b> | 0,81 ± 0,16                    | 0,75 ± 0,1                |
| <b>LVPWs (mm)</b> | 0,95 ± 0,25                    | 1,02 ± 0,15               |
| <b>EF (%)</b>     | 18,36 ± 8,64 \$\$\$\$ p<0.0001 | 39,22 ± 19,11 ## p=0.0036 |
| <b>FS (%)</b>     | 8,46 ± 4,14 \$\$\$\$ p<0.0001  | 19,89 ± 11,32 ## p=0.0051 |
| <b>Heart rate</b> | 404 ± 30                       | 376 ± 60                  |

sham, sham-operated control group; MI, myocardial infarction; BW, body weight; HW, heart weight; TL, tibia length; IVSd, interventricular septal thickness at end-diastole; IVSs, interventricular septal thickness at end-systole; LVIDd, left ventricular internal dimension at end-diastole; LVIDs, left ventricular internal dimension at end-systole; LVPWd, left ventricular posterior wall thickness at end-diastole; LVPWs, left ventricular posterior wall thickness at end-systole; EF, ejection fraction; FS, fractional shortening; Data are expressed as means ± STDEV. Comparison of two groups was performed with the unpaired, two-tailed Student's t-test between Zeb2 WT post-MI vs Zeb2 WT post-sham (indicated by dollar sign, \$\$\$p<0.001, \$\$\$\$p<0.0001) and Zeb2 cTg post-MI vs Zeb2 WT post-MI (indicated by pound sign, #p<0.05, ##p<0.01).

**Supplementary Table 5. Morphometric and echocardiographic characteristic of sham or MI subjected mice treated with AAV9-control and AAV9-Zeb2 for 14 days.**

|                   | AAV9-control                   | AAV9-Zeb2                |
|-------------------|--------------------------------|--------------------------|
| <b>Surgery</b>    | sham                           | sham                     |
| <b>n</b>          | 6                              | 6                        |
| <b>BW (g)</b>     | 26,66 ± 2,77                   | 25,75 ± 1,29             |
| <b>HW (g)</b>     | 0,12 ± 0,01                    | 0,13 ± 0,01              |
| <b>TL (mm)</b>    | 16,80 ± 0,37                   | 16,81 ± 0,19             |
| <b>IVSd (mm)</b>  | 0,78 ± 0,09                    | 0,75 ± 0,08              |
| <b>IVSs (mm)</b>  | 1,09 ± 0,11                    | 1,09 ± 0,11              |
| <b>LVIDd (mm)</b> | 3,86 ± 0,19                    | 3,76 ± 0,19              |
| <b>LVIDs (mm)</b> | 2,93 ± 0,38                    | 2,85 ± 0,28              |
| <b>LVPWd (mm)</b> | 0,79 ± 0,08                    | 0,83 ± 0,08              |
| <b>LVPWs (mm)</b> | 0,95 ± 0,09                    | 1,02 ± 0,12              |
| <b>EF (%)</b>     | 48,56 ± 10,69                  | 48,79 ± 9,32             |
| <b>FS (%)</b>     | 24,36 ± 6,42                   | 24,36 ± 5,44             |
| <b>Heart rate</b> | 398 ± 30                       | 416 ± 20                 |
|                   | AAV9-control                   | AAV9-Zeb2                |
| <b>Surgery</b>    | MI                             | MI                       |
| <b>n</b>          | 10                             | 10                       |
| <b>BW (g)</b>     | 27,96 ± 1,44                   | 25,87 ± 2,41             |
| <b>HW (g)</b>     | 0,16 ± 0,02                    | 0,16 ± 0,03              |
| <b>TL (mm)</b>    | 16,93 ± 0,44                   | 16,76 ± 0,30             |
| <b>IVSd (mm)</b>  | 0,64 ± 0,07 \$\$\$ p=0.0041    | 0,83 ± 0,13 ### p=0.0009 |
| <b>IVSs (mm)</b>  | 0,68 ± 0,11 \$\$\$\$ p<0.0001  | 0,99 ± 0,19 ### p=0.0003 |
| <b>LVIDd (mm)</b> | 5,26 ± 0,78 \$\$\$ p=0.0007    | 4,51 ± 0,58 # p=0.0271   |
| <b>LVIDs (mm)</b> | 4,69 ± 0,88 \$\$\$ p=0.0003    | 3,67 ± 0,52 ## p=0.0066  |
| <b>LVPWd (mm)</b> | 0,75 ± 0,12                    | 0,86 ± 0,08 # p=0.0302   |
| <b>LVPWs (mm)</b> | 0,89 ± 0,15                    | 1,08 ± 0,11## p=0.0061   |
| <b>EF (%)</b>     | 23,97 ± 9,76 \$\$\$\$ p=0.0002 | 38,95 ± 8,43 ## p=0.0019 |
| <b>FS (%)</b>     | 11,21 ± 4,69 \$\$\$ p=0.0002   | 18,93 ± 4,68 ## p=0.0018 |
| <b>Heart rate</b> | 403 ± 34                       | 401 ± 66                 |

sham, sham-operated control group; MI, myocardial infarction; BW, body weight; HW, heart weight; TL, tibia length; IVSd, interventricular septal thickness at end-diastole; IVSs, interventricular septal thickness at end-systole; LVIDd, left ventricular internal dimension at end-diastole; LVIDs, left ventricular internal dimension at end-systole; LVPWd, left ventricular posterior wall thickness at end-diastole; LVPWs, left ventricular posterior wall thickness at end-systole; EF, ejection fraction; FS, fractional shortening; Data are expressed as means ± STDEV. Comparison of two groups was performed with the unpaired, two-tailed Student's t-test between AAV9-control post-MI vs AAV9-control post-sham (indicated by dollar sign, \$\$\$p<0.01, \$\$\$\$p<0.001, \$\$\$\$p<0.0001) and AAV9-Zeb2 post-MI vs AAV9-control post-MI (indicated by pound sign, #p<0.05, ##p<0.01, ###p<0.001).

**Supplementary Table 6. Morphometric and echocardiographic characteristic of sham or MI subjected mice treated with AAV9-control and AAV9-Zeb2 for 28 days.**

|                   | AAV9-control                   | AAV9-Zeb2                |
|-------------------|--------------------------------|--------------------------|
| <b>Surgery</b>    | sham                           | sham                     |
| <b>n</b>          | 6                              | 6                        |
| <b>BW (g)</b>     | 25,61 ± 1,83                   | 28,06 ± 2,12             |
| <b>HW (g)</b>     | 0,14 ± 0,02                    | 0,13 ± 0,01              |
| <b>TL (mm)</b>    | 16,70 ± 0,34                   | 17,04 ± 0,44             |
| <b>IVSd (mm)</b>  | 0,77 ± 0,09                    | 0,77 ± 0,09              |
| <b>IVSs (mm)</b>  | 1,03 ± 0,16                    | 1,05 ± 0,13              |
| <b>LVIDd (mm)</b> | 3,91 ± 0,55                    | 4,00 ± 0,27              |
| <b>LVIDs (mm)</b> | 3,20 ± 0,45                    | 3,31 ± 0,33              |
| <b>LVPWd (mm)</b> | 0,75 ± 0,12                    | 0,79 ± 0,17              |
| <b>LVPWs (mm)</b> | 0,87 ± 0,10                    | 0,97 ± 0,22              |
| <b>EF (%)</b>     | 38,09 ± 1,57                   | 36,22 ± 10,81            |
| <b>FS (%)</b>     | 18,07 ± 0,94                   | 17,34 ± 6,04             |
| <b>Heart rate</b> | 426 ± 29                       | 432 ± 54                 |
|                   | AAV9-control                   | AAV9-Zeb2                |
| <b>Surgery</b>    | MI                             | MI                       |
| <b>n</b>          | 10                             | 10                       |
| <b>BW (g)</b>     | 27,43 ± 2,45                   | 28,95 ± 2,45             |
| <b>HW (g)</b>     | 0,16 ± 0,03                    | 0,17 ± 0,03              |
| <b>TL (mm)</b>    | 17,00 ± 0,28                   | 17,29 ± 0,50             |
| <b>IVSd (mm)</b>  | 0,71 ± 0,13                    | 0,83 ± 0,13 # p=0.0301   |
| <b>IVSs (mm)</b>  | 0,79 ± 0,22 \$ p=0.0310        | 0,96 ± 0,25              |
| <b>LVIDd (mm)</b> | 5,29 ± 0,89 \$\$ p=0.0034      | 5,28 ± 0,78              |
| <b>LVIDs (mm)</b> | 4,89 ± 0,99 \$\$ p=0.0012      | 4,64 ± 0,96              |
| <b>LVPWd (mm)</b> | 0,82 ± 0,09                    | 0,84 ± 0,12              |
| <b>LVPWs (mm)</b> | 0,93 ± 0,12                    | 1,04 ± 0,14 # p=0.0413   |
| <b>EF (%)</b>     | 17,27 ± 9,05 \$\$\$\$ p<0.0001 | 26,56 ± 12,24 # p=0.0499 |
| <b>FS (%)</b>     | 7,912 ± 4,28 \$\$\$\$ p<0.0001 | 12,61 # 6,21 # p=0.0451  |
| <b>Heart rate</b> | 450 ± 59                       | 431 ± 45                 |

sham, sham-operated control group; MI, myocardial infarction; BW, body weight; HW, heart weight; TL, tibia length; IVSd, interventricular septal thickness at end-diastole; IVSs, interventricular septal thickness at end-systole; LVIDd, left ventricular internal dimension at end-diastole; LVIDs, left ventricular internal dimension at end-systole; LVPWd, left ventricular posterior wall thickness at end-diastole; LVPWs, left ventricular posterior wall thickness at end-systole; EF, ejection fraction; FS, fractional shortening; Data are expressed as means ± STDEV. Comparison of two groups was performed with the unpaired, two-tailed Student's t-test between AAV9-control post-MI vs AAV9-control post-sham (indicated by dollar sign, \$p=0.05, \$\$p<0.01, \$\$\$\$p<0.0001) and AAV9-Zeb2 post-MI vs AAV9-control post-MI (indicated by pound sign, #p<0.05).

**Supplementary Table 7. List of primers used in this study.**

| Gene                       | Species | Purpose    | Forward                                  | Reverse                                                                                                           |
|----------------------------|---------|------------|------------------------------------------|-------------------------------------------------------------------------------------------------------------------|
| <i>Zeb2</i>                | mouse   | QPCR       | gagcaggtaccgcaagttc                      | aagcgtttctgcagttgg                                                                                                |
| <i>App</i>                 | mouse   | QPCR       | gaatggaaagtgaggagtcagac                  | accagttctgtagtgtaactg                                                                                             |
| <i>Basp1</i>               | mouse   | QPCR       | cggggagagagagagccttg                     | cttctctgctcagcttgcc                                                                                               |
| <i>Clic1</i>               | mouse   | QPCR       | cacagacaccaacaagatcgag                   | ttgcaaatatgtccagtcocg                                                                                             |
| <i>Dynll1</i>              | mouse   | QPCR       | gaaggatattgcgccataatc                    | agtgttggttcagtgctac                                                                                               |
| <i>Ptma</i>                | mouse   | QPCR       | caccaaggactgaaggagaag                    | ctacctattgctcagcctctg                                                                                             |
| <i>Rack1</i>               | mouse   | QPCR       | gaggtcactcccactctgtag                    | gacaaatcgctgtggtg                                                                                                 |
| <i>Spcs2</i>               | mouse   | QPCR       | agaactctctgtagctctgc                     | atcccaaatcaaacgacgatg                                                                                             |
| <i>Tapbp</i>               | mouse   | QPCR       | gccagatctgacccaaagc                      | gatgaagcggctcatctcg                                                                                               |
| <i>Tmsb4</i>               | mouse   | QPCR       | aacgcaagagaaaaatcctctg                   | aaataagaaggcaatgctctg                                                                                             |
| <i>Tmsb10</i>              | mouse   | QPCR       | taaggccaagctgaagaaaacc                   | gggtctggagatgagggg                                                                                                |
| <i>Ywhab</i>               | mouse   | QPCR       | ggacacgaactccaatgaag                     | ctgctctctctcactctc                                                                                                |
| <i>Pecam1</i>              | mouse   | QPCR       | gaacggaagctcccttaat                      | ggggacaggctcaataatcg                                                                                              |
| <i>Vegf (all isoforms)</i> | mouse   | QPCR       | tgccgatcaaacctcacaaa                     | ctggctttgctgtctttttgg                                                                                             |
| <i>Sfp2</i>                | mouse   | QPCR       | gaagcctgcaaaccaagaatg                    | ctgctctgtctccaggatg                                                                                               |
| <i>Gpnmb</i>               | mouse   | QPCR       | gaatgggatgaacacctgtatcc                  | ccacaaaagtgaatgggaacc                                                                                             |
| <i>Thbs1</i>               | mouse   | QPCR       | caaggcattgatctctctcc                     | gttgcaaaaggagatgcaatg                                                                                             |
| <i>Eln</i>                 | mouse   | QPCR       | gttccgggtgagctctattac                    | ctccaaacgtcccagaagtc                                                                                              |
| <i>Egf</i>                 | mouse   | QPCR       | aagagtttcttaacgggacag                    | tgactcctctgtgtgtctac                                                                                              |
| <i>Epn3</i>                | mouse   | QPCR       | agtcgcaagaggctgaaag                      | cactggagatcctccctc                                                                                                |
| <i>Myot</i>                | mouse   | QPCR       | aaatgcaaagacacccctctc                    | atgctgtgtggaacttgagc                                                                                              |
| <i>Mybpc2</i>              | mouse   | QPCR       | atcaagtgttcaagggaag                      | acgggtacacattgctgtgag                                                                                             |
| <i>Gata2</i>               | mouse   | QPCR       | tgtctctcaaccatctcgac                     | gctgtgcaacaagtggtg                                                                                                |
| <i>Acta2</i>               | mouse   | QPCR       | accacccagagtgagaag                       | agcatcatcaccagcgaag                                                                                               |
| <i>Notch1</i>              | mouse   | QPCR       | ccctgctctgacctaacg                       | gcagacacaggctcagtg                                                                                                |
| <i>Zeb2</i>                | rat     | QPCR       | ccgttgacctgtcattacc                      | ggatgaagaacactgtgtg                                                                                               |
| <i>App</i>                 | rat     | QPCR       | aatggaaaatgggagtcagacc                   | accagttctgtagtgtaactg                                                                                             |
| <i>Basp1</i>               | rat     | QPCR       | gaaggagagcgaacccag                       | ctgtcggcctcctttctc                                                                                                |
| <i>Clic1</i>               | rat     | QPCR       | gagtcacctcaacgttaccac                    | ttgtgtatctgtgtgcactc                                                                                              |
| <i>Dynll1</i>              | rat     | QPCR       | cacggtaaacatgtgagac                      | tactctcaacgctgagtag                                                                                               |
| <i>Ptma</i>                | rat     | QPCR       | ggaggcagagaatggaagagac                   | cttctccatcaccctcttc                                                                                               |
| <i>Rack1</i>               | rat     | QPCR       | gtttagcgtgtgtctctcc                      | gacaaatgctcgtgtgtagt                                                                                              |
| <i>Spcs2</i>               | rat     | QPCR       | ccgcagtggttgataag                        | gagaccgaagtctccacatac                                                                                             |
| <i>Tapbp</i>               | rat     | QPCR       | cggccagatctgacccaaag                     | gaacgggagtgtgctctatc                                                                                              |
| <i>Tmsb4</i>               | rat     | QPCR       | gatgcaaaaggttgatcaag                     | catgcaagttcttccctctc                                                                                              |
| <i>Tmsb10</i>              | rat     | QPCR       | taaggccaagctgaagaaaacc                   | ttctggagatgaagggtg                                                                                                |
| <i>Ywhab</i>               | rat     | QPCR       | gtaacagagcagggacatgaac                   | ctgctctctctcactctc                                                                                                |
| <i>Col1a2</i>              | rat     | QPCR       | tggaacacctggaagacctg                     | atccagaccgtgtgtctctc                                                                                              |
| <i>Col3a1</i>              | rat     | QPCR       | agctggacaaaagggtgatg                     | gacctctgctccagttagc                                                                                               |
| <i>Bcl2</i>                | rat     | QPCR       | gtggacaacatgctctgtg                      | ctgagcagcgtctcagaga                                                                                               |
| <i>Vegf (all isoforms)</i> | rat     | QPCR       | gcggatcaaacctcacaaaag                    | tggtcttctctctctctg                                                                                                |
| <i>Pecam1</i>              | rat     | QPCR       | atatcagcaccacctcgaatc                    | agactgaggatgacgaagctc                                                                                             |
| <i>ZEB2</i>                | human   | QPCR       | gacattccagaaaagcagttcc                   | gaagccttgatgctcgataag                                                                                             |
| <i>TMSB4</i>               | human   | QPCR       | aacgcaagagaaaaatcctctg                   | aaataagaaggcaatgctctg                                                                                             |
| <i>PTMA</i>                | human   | QPCR       | caccaccaaggactaaaggag                    | cttctctactctctctctc                                                                                               |
| <i>VEGFR1</i>              | human   | QPCR       | gctcagctgctgctctcac                      | agaccattatggctgctctc                                                                                              |
| <i>VEGFR2</i>              | human   | QPCR       | caggatgcaagcaagggtg                      | ctggcagatcaagaaaacac                                                                                              |
| <i>FGF2</i>                | human   | QPCR       | tgccaaggctgaaattatcc                     | ctcgttctctcaaaaag                                                                                                 |
| <i>NOTCH1</i>              | human   | QPCR       | ggaggcatcctcactctctc                     | tggtgtctgagcactctc                                                                                                |
| <i>MIK167</i>              | human   | QPCR       | aaaaggattccctcagcaagcc                   | ccctcactctcaataatgaaatc                                                                                           |
| <i>PCNA</i>                | human   | QPCR       | gaacctcaccagtgtccaaaatac                 | cttctctggtgtgctctc                                                                                                |
| <i>CDK4</i>                | human   | QPCR       | aatgcatctgctcaccgagatctg                 | gagtgtacaaccacgggtgtaa                                                                                            |
| Cre                        |         | genotyping | gaagcaactcatcgattgattacg                 | cactatccagggtacggatagttc                                                                                          |
| Zeb2 floxed allele         |         | genotyping | (intron 6) gaactagttgaatggtagaatcaatgggg | (intron 6) atcagcagctcctcttaaacagagtgctc                                                                          |
| Zeb2 knock in              |         | genotyping | aaagtcgctctgagttgattat                   | (intron 7) aagcatgtcggtgaagctgacccaactctag<br>(wild type) ggagcgggagaaatggatag<br>(knock in) gcgaagagttgtcctcaacc |
