# Supplementary material for: Cardiomyocytes stimulate angiogenesis after ischemic injury in a ZEB2-dependent manner
Source: Nat Commun. 2021 Jan 4;12:84. doi: 10.1038/s41467-020-20361-3 (PMC7782784; doi:10.1038/s41467-020-20361-3)
Supplement: Supplementary file 4 — Supplementary Data 1 [file 41467_2020_20361_MOESM4_ESM.xlsx]

## Sheet: Cluster information
Supplementary Data 1
Cluster	Number of cells	Cell type
1	110	Cardiomyocytes
2	131	Immune cells
3	308	Cardiomyocytes
4	75	Cardiomyocytes
5	46	Endothelial cells
6	96	Fibroblasts
7	191	Macrophages/Immune cells
8	6	Erythrocytes
9	188	Macrophages/Immune cells
10	13	Fibroblasts
11	7	Fibroblasts
12	4	unknown
13	8	Macrophages/Immune cells
14	3	Cardiomyocytes

## Sheet: Cluster 1
CLUSTER 1
GENEID	mean non cluster	mean cluster	fold change	p value
Myh6__chr14	2.12599	15.1801	7.14025	1.08002e-09
Atp2a2__chr5	2.62855	18.0397	6.86298	6.01259e-11
Lpl__chr8	1.34054	8.21949	6.13146	1.14515e-05
Atp1a2__chr1	0.292558	1.67876	5.7382	0.0352761
Casq2__chr3	0.312946	1.77844	5.68288	0.0398336
Ttn__chr2	2.14306	11.7744	5.49419	2.67804e-06
Cox6a2__chr7	0.979696	5.04382	5.14835	0.000531163
Kcnk3__chr5	0.182795	0.891479	4.87693	0.167047
Hrc__chr7	0.310553	1.50824	4.85663	0.0392877
Srl__chr16	0.173732	0.807739	4.64935	0.159463
Tnnt2__chr1	1.86721	8.51024	4.55774	0.000142026
Slc25a4__chr8	1.41244	6.41727	4.54339	0.000650042
Ptgds__chr2	0.202388	0.916078	4.52633	0.183208
Tmem38a__chr8	0.170982	0.765791	4.47879	0.157149
Mb__chr15	2.16387	9.55343	4.41497	8.69409e-05
Ldhb__chr6	0.264599	1.1661	4.40702	0.0293852
Ckm__chr7	0.296121	1.30437	4.40484	0.0360571
Myom1__chr17	0.215601	0.9424	4.37104	0.193928
D830015G02Rik__chr14	0.137638	0.588378	4.27482	0.128573
Tnni3__chr7	0.797098	3.40344	4.26979	0.00894748
Myl3__chr9	0.871514	3.6686	4.20946	0.0120702
Myl2__chr5	1.57995	6.64358	4.20493	0.00123501
Actc1__chr2	2.15017	9.04118	4.20487	8.2588e-05
Fndc5__chr4	0.154762	0.642059	4.14868	0.143368
Eno3__chr11	0.227878	0.940846	4.12872	0.203764
Obscn__chr11	0.175233	0.719844	4.10792	0.160725
Ryr2__chr13	0.240036	0.972419	4.05115	0.213385
Ckmt2__chr13	0.249228	1.00201	4.02046	0.0263325
Actn2__chr13	0.19751	0.782159	3.96009	0.179214
Fabp3__chr4	0.452162	1.77891	3.93424	0.0760234
Pygm__chr19	0.218747	0.855007	3.90865	0.19646
Dsp__chr13	0.160983	0.624708	3.88059	0.14868
Eef1a2__chr2	0.204445	0.788946	3.85897	0.184885
Myom2__chr8	0.14812	0.566983	3.82786	0.137659
Popdc2__chr16	0.162687	0.622224	3.82467	0.150129
Clu__chr14	0.264699	1.01165	3.82188	0.0294055
Gm5595__chr7	0.168833	0.620207	3.67349	0.155336
Mybpc3__chr2	0.403841	1.48151	3.66854	0.0625526
Hhatl__chr9	0.0939005	0.344177	3.66534	0.0896166
Ndrg2__chr14	0.295238	1.07035	3.62539	0.0358629
Tpm1__chr9	1.4529	5.23295	3.60172	0.00380735
Pln__chr10	0.573505	2.06471	3.60016	0.0205517
Trdn__chr10	0.164852	0.591785	3.5898	0.151967
Mdh1__chr11	0.345436	1.23947	3.58814	0.0475238
Idh2__chr7	0.208021	0.742576	3.56971	0.187795
Bsg__chr10	0.596402	2.1203	3.55515	0.0227319
Tecr__chr8	0.33552	1.16924	3.48487	0.0451231
Fxyd1__chr7	0.228733	0.796172	3.48079	0.204444
Oxct1__chr15	0.280209	0.973	3.47241	0.24436
Mfn2__chr4	0.186223	0.64098	3.442	0.169897
Tnnc1__chr14	0.302885	1.03341	3.41188	0.0375578
Sgca__chr11	0.107159	0.362236	3.38036	0.101606
Cmya5__chr13	0.139357	0.467532	3.35493	0.13007
Dgat2__chr7	0.11587	0.38856	3.35342	0.109397
Acadl__chr1	0.262068	0.878366	3.35167	0.230526
Cd59a__chr2	0.121316	0.401487	3.30943	0.114234
Lamb2__chr9	0.155386	0.513825	3.30676	0.143902
Slc2a4__chr11	0.119518	0.393979	3.29639	0.112641
Sgcg__chr14	0.102751	0.337013	3.2799	0.0976378
Des__chr1	0.443484	1.45165	3.27328	0.073541
Cpe__chr8	0.136431	0.446054	3.26945	0.127521
Adprhl1__chr8	0.133362	0.43249	3.24298	0.124839
Ndufs1__chr1	0.166396	0.539364	3.24145	0.153275
Cs__chr10	0.320746	1.03647	3.23144	0.041633
Pde4dip__chr3	0.19604	0.633114	3.22951	0.178006
Hspb6__chr7	0.249272	0.792402	3.17887	0.220617
Fhl2__chr1	0.232121	0.737492	3.17719	0.207134
Nexn__chr3	0.18804	0.591374	3.14494	0.171404
Smpd1__chr7	0.137513	0.431147	3.13531	0.128465
Nppa__chr4	0.206127	0.644947	3.12888	0.186255
Hadhb__chr5	0.269529	0.838355	3.11045	0.236246
Pfkm__chr15	0.130201	0.404896	3.10979	0.122068
Cox4i1__chr8	0.532497	1.65207	3.1025	0.10017
Art1__chr7	0.0985865	0.302265	3.06599	0.0938723
Gpc1__chr1	0.134058	0.408445	3.04677	0.125448
Atp5b__chr10	0.847137	2.57795	3.04313	0.0543802
Atp5a1__chr18	0.674509	2.02714	3.00536	0.0310761
Chchd10__chr10	0.193171	0.580211	3.00361	0.175644
Hspb8__chr5	0.184936	0.552442	2.9872	0.168828
Uqcrc1__chr9	0.287937	0.860028	2.98686	0.250177
Ndufv1__chr19	0.169542	0.505128	2.97937	0.155935
Atp1b1__chr1	0.122958	0.366287	2.97896	0.115687
Slc4a3__chr1	0.1096	0.325373	2.96874	0.103796
Idh3b__chr2	0.249701	0.741101	2.96795	0.220951
Cox7a1__chr7	0.168978	0.499155	2.95398	0.155458
Vegfb__chr19	0.134999	0.398373	2.95092	0.126271
Golga4__chr9	0.162141	0.475715	2.93396	0.149665
Cox8b__chr7	0.130531	0.382586	2.93101	0.122358
Tcap__chr11	0.29547	0.865373	2.92881	0.255803
Aco2__chr15	0.342006	1.00121	2.92747	0.0466882
Sorbs1__chr19	0.173299	0.507029	2.92575	0.159099
Scn5a__chr9	0.101246	0.29431	2.90688	0.0962788
Ech1__chr7	0.238491	0.687031	2.88074	0.212169
Ldb3__chr14	0.171128	0.492661	2.8789	0.157272
Atp5g1__chr11	0.414685	1.192	2.87447	0.0654989
Coq10a__chr10	0.110136	0.316364	2.87249	0.104276
Fhod3__chr18	0.0927843	0.265854	2.86529	0.0885999
Acadm__chr3	0.18162	0.52023	2.86439	0.166067
Cryab__chr9	0.766204	2.18279	2.84884	0.042639
Vldlr__chr19	0.119134	0.338675	2.84281	0.112299
Ank1__chr8	0.111436	0.316619	2.84125	0.10544
Pdha1__chrX	0.21181	0.600341	2.83433	0.190867
Cd36__chr5	0.547254	1.54013	2.81428	0.104813
Got2__chr8	0.203162	0.571386	2.81246	0.183839
Hfe2__chr3	0.130125	0.363551	2.79385	0.122002
Ndufb11__chrX	0.211296	0.589095	2.78801	0.190451
Fam174b__chr7	0.10671	0.296754	2.78095	0.101203
Fitm1__chr14	0.101388	0.28179	2.77933	0.0964068
Cacna2d1__chr5	0.11902	0.330501	2.77684	0.112199
Ogdh__chr11	0.357542	0.991083	2.77193	0.300594
Slc41a3__chr6	0.10792	0.298993	2.7705	0.10229
Ndufs2__chr1	0.250643	0.693483	2.76682	0.221684
Pink1__chr4	0.15463	0.427251	2.76306	0.143254
Cdh2__chr18	0.127904	0.351364	2.7471	0.12005
Sspn__chr6	0.136235	0.373108	2.73872	0.12735
Dmpk__chr7	0.157698	0.43025	2.72831	0.145879
Hadha__chr5	0.18504	0.504431	2.72606	0.168915
Cyc1__chr15	0.223463	0.608364	2.72244	0.200241
Itga7__chr10	0.0962349	0.261181	2.714	0.0917392
Kcng2__chr18	0.0893315	0.242364	2.71309	0.085448
Ndufb5__chr3	0.225592	0.611358	2.71002	0.201941
Atp5g3__chr2	0.723594	1.95903	2.70736	0.163992
Tns1__chr1	0.243169	0.655145	2.6942	0.215846
Crip2__chr12	0.392423	1.05683	2.69308	0.0595009
Tmem66__chr8	0.190493	0.512837	2.69216	0.173434
Rtn2__chr7	0.079285	0.21338	2.6913	0.0762145
Cisd1__chr10	0.14481	0.389721	2.69125	0.134801
Uqcrfs1__chr13	0.281354	0.753227	2.67715	0.245224
Art3__chr5	0.106687	0.285592	2.67692	0.101182
Lrrc10__chr10	0.0885007	0.236888	2.67668	0.0846879
Pgam2__chr11	0.136792	0.364419	2.66403	0.127836
Csrp3__chr7	0.235969	0.628376	2.66296	0.21018
Ankrd1__chr19	0.366833	0.976617	2.66229	0.307063
Yipf7__chr5	0.0829556	0.220492	2.65795	0.0795988
Uqcrc2__chr7	0.21146	0.5612	2.65394	0.190583
Lrrc2__chr9	0.152619	0.404821	2.65249	0.14153
Sdhb__chr4	0.22317	0.59135	2.64977	0.200006
Decr1__chr4	0.124218	0.32738	2.63553	0.116801
S100a1__chr3	0.217799	0.571801	2.62536	0.195698
Sod2__chr17	0.18738	0.489458	2.61211	0.170857
Pdk4__chr6	0.117388	0.303962	2.58939	0.110748
Asph__chr4	0.133559	0.345572	2.58742	0.125011
Trabd2b__chr4	0.109779	0.284038	2.58736	0.103957
Hadh__chr3	0.145467	0.375714	2.58282	0.135368
Ndufa9__chr6	0.13306	0.343562	2.582	0.124575
Trim72__chr7	0.105441	0.27195	2.57917	0.100061
2310042D19Rik__chr4	0.102659	0.264597	2.57743	0.0975546
Bcam__chr7	0.150809	0.388123	2.57361	0.139974
Ndufb9__chr15	0.221848	0.568651	2.56325	0.198948
Ndufa1__chrX	0.239991	0.614503	2.56053	0.21335
Gaa__chr11	0.123967	0.316352	2.55191	0.116579
Coq9__chr8	0.114939	0.292921	2.5485	0.108568
Cox5a__chr9	0.370042	0.942361	2.54663	0.309283
Zfp106__chr2	0.203839	0.518949	2.54587	0.184392
Wfs1__chr5	0.0948529	0.241441	2.54543	0.0904831
Smyd1__chr6	0.098556	0.250826	2.54501	0.0938447
Etfdh__chr3	0.108858	0.276885	2.54355	0.103131
Mtfp1__chr11	0.0892967	0.22705	2.54265	0.0854161
Hspb7__chr4	0.261589	0.663761	2.53742	0.230158
Ndufa13__chr8	0.217381	0.551542	2.53722	0.195361
Cox7b__chrX	0.307501	0.774279	2.51797	0.264704
Trp53inp2__chr2	0.216241	0.544379	2.51747	0.194444
Reep5__chr18	0.248284	0.624585	2.5156	0.219847
Tuba4a__chr1	0.161748	0.406381	2.51244	0.14933
Etfa__chr9	0.169432	0.423904	2.50191	0.155842
Acat1__chr9	0.159537	0.398563	2.49824	0.147448
Ndufa4__chr6	0.272513	0.680578	2.49741	0.238522
Ak1__chr2	0.16141	0.40271	2.49495	0.149043
Ndufs3__chr2	0.188861	0.468596	2.48117	0.172084
Dst__chr1	0.201454	0.499834	2.48114	0.182444
Sdha__chr13	0.217765	0.53808	2.47093	0.19567
Atp5h__chr11	0.502921	1.24137	2.46831	0.0910497
Pygb__chr2	0.143497	0.353922	2.4664	0.133664
Slc8a1__chr17	0.133141	0.326367	2.45129	0.124646
Got1__chr19	0.230392	0.563712	2.44676	0.205762
Mpc2__chr1	0.180732	0.440409	2.4368	0.165327
Ppargc1a__chr5	0.0824483	0.200388	2.43046	0.0791318
Etfb__chr7	0.173965	0.422257	2.42725	0.15966
Tspan3__chr9	0.167028	0.405075	2.42519	0.15381
Speg__chr1	0.118692	0.287665	2.42363	0.111907
Jph2__chr2	0.114994	0.277127	2.40993	0.108617
BC004004__chr17	0.146086	0.352026	2.40972	0.135903
Ndufs6__chr13	0.16879	0.405452	2.40211	0.1553
Mylk3__chr8	0.0975853	0.234343	2.40141	0.0929647
Map1lc3a__chr2	0.147016	0.351835	2.39318	0.136706
Nnt__chr13	0.114745	0.274565	2.39282	0.108395
Atp5o__chr16	0.338007	0.807697	2.38959	0.286796
Ablim1__chr19	0.130145	0.309328	2.3768	0.122019
Slc25a3__chr10	0.440812	1.0471	2.3754	0.0727818
Ndufa5__chr6	0.172864	0.410384	2.37403	0.158734
Phyh__chr2	0.137337	0.325969	2.3735	0.128311
Crat__chr2	0.127514	0.302031	2.36861	0.119707
Corin__chr5	0.0877551	0.207762	2.36752	0.0840052
Myoz2__chr3	0.20064	0.474585	2.36535	0.181778
Mtus2__chr5	0.0891573	0.210657	2.36276	0.0852886
Mgst3__chr1	0.0873527	0.205914	2.35727	0.0836366
Acot13__chr13	0.129719	0.305777	2.35723	0.121645
Mdh2__chr5	0.290534	0.68482	2.35711	0.252121
Idh3a__chr9	0.146002	0.343928	2.35563	0.135831
Suclg1__chr6	0.155126	0.364992	2.35288	0.143679
Abcc9__chr6	0.106763	0.251154	2.35244	0.101251
Cd151__chr7	0.16425	0.382094	2.3263	0.151456
Adck3__chr1	0.104115	0.241841	2.32282	0.0988678
Ces1d__chr8	0.09278	0.215105	2.31844	0.088596
Efnb3__chr11	0.0880798	0.204104	2.31726	0.0843026
Nrap__chr19	0.111524	0.258152	2.31476	0.105519
Ephx2__chr14	0.0990353	0.229215	2.31448	0.0942788
Acadvl__chr11	0.142059	0.328425	2.31188	0.132417
Pdk2__chr11	0.1184	0.273316	2.3084	0.111648
Ktn1__chr14	0.132293	0.305151	2.30663	0.123903
Idh3g__chrX	0.153715	0.353739	2.30126	0.14247
Lmod2__chr6	0.0921267	0.211639	2.29727	0.0880004
Gbas__chr5	0.177106	0.405276	2.28833	0.162295
Nfe2l1__chr11	0.157268	0.35959	2.28647	0.145511
Acaa2__chr18	0.204428	0.467301	2.2859	0.184872
Pam__chr1	0.169498	0.385439	2.274	0.155897
Fam134b__chr15	0.131886	0.299762	2.27289	0.123546
Rcan2__chr17	0.127684	0.289214	2.26507	0.119857
Sucla2__chr14	0.162144	0.366895	2.26278	0.149667
Atp5c1__chr2	0.429705	0.970811	2.25925	0.34929
Grb14__chr2	0.0945121	0.21346	2.25854	0.0901731
Pptc7__chr5	0.125207	0.282731	2.25812	0.117673
Atp5f1__chr3	0.196942	0.443177	2.25029	0.178747
Pkp2__chr16	0.0829917	0.186752	2.25025	0.079632
Cst3__chr2	0.909667	2.04648	2.2497	0.064394
Kif1c__chr11	0.167955	0.37739	2.24698	0.154594
Ppif__chr14	0.114361	0.256545	2.24329	0.108053
Svil__chr18	0.138174	0.30924	2.23804	0.12904
Mfn1__chr3	0.106088	0.236977	2.23378	0.100643
Slc12a7__chr13	0.105164	0.234216	2.22715	0.0998122
Asb2__chr12	0.0929818	0.206895	2.22512	0.0887799
Pcdh7__chr5	0.0960327	0.213551	2.22373	0.0915555
Slc16a1__chr3	0.100165	0.222731	2.22365	0.0953013
Cycs__chr6	0.465889	1.0356	2.22284	0.0800038
Akap6__chr12	0.0857528	0.190498	2.22148	0.0821695
Eci1__chr17	0.152661	0.339121	2.2214	0.141566
Tcea3__chr4	0.0838605	0.186199	2.22034	0.0804312
Tmem147__chr7	0.139225	0.307367	2.2077	0.129955
Ndufb8__chr19	0.222373	0.48988	2.20297	0.199368
Myo18b__chr5	0.101584	0.223631	2.20144	0.0965839
Lrtm1__chr14	0.113156	0.248829	2.19898	0.106978
Ndufab1__chr7	0.226209	0.495484	2.19039	0.202433
Trim54__chr5	0.0872052	0.19066	2.18634	0.0835014
Pdhb__chr14	0.155667	0.33992	2.18364	0.144142
Hopx__chr5	0.14312	0.312232	2.18161	0.133337
Tead1__chr7	0.128597	0.280424	2.18065	0.120659
Egln1__chr8	0.163358	0.355625	2.17697	0.150699
Asb11__chrX	0.0793161	0.172546	2.17543	0.0762432
Itgb1bp2__chrX	0.0926004	0.201328	2.17416	0.0884323
Cox6c__chr15	0.378463	0.820321	2.1675	0.315075
Cluh__chr11	0.103272	0.223822	2.16731	0.0981075
Ndufa12__chr10	0.256301	0.554871	2.16492	0.226076
Atp5j__chr16	0.352453	0.760667	2.15821	0.297026
Ndrg4__chr8	0.116115	0.250548	2.15775	0.109616
Ptgr2__chr12	0.101451	0.217858	2.14742	0.0964638
Fuca2__chr10	0.125124	0.268612	2.14676	0.117601
Gja1__chr10	0.159116	0.3405	2.13995	0.147089
Pxmp2__chr5	0.0886136	0.18876	2.13015	0.0847912
Nppb__chr4	0.108361	0.230469	2.12687	0.102685
Ccser2__chr14	0.167343	0.35553	2.12456	0.154077
Agpat3__chr10	0.107873	0.228715	2.12022	0.102248
Tango2__chr16	0.0946335	0.200392	2.11756	0.0902836
Ndufa3__chr7	0.210446	0.445375	2.11634	0.189762
Ppp2r3a__chr9	0.107769	0.227616	2.11207	0.102154
Lmo7__chr14	0.103009	0.217493	2.11139	0.0978708
Ndufb10__chr17	0.190636	0.401795	2.10765	0.173552
Tmem246__chr4	0.0838921	0.176629	2.10544	0.0804602
Prkaa2__chr4	0.0849954	0.178776	2.10336	0.0814741
Usp2__chr9	0.0983444	0.206569	2.10046	0.0936529
Psme4__chr11	0.148542	0.311594	2.09768	0.138023
Cox5b__chr1	0.325707	0.682608	2.09577	0.27797
Kcnj11__chr7	0.0841345	0.175858	2.0902	0.0806831
Nceh1__chr3	0.159725	0.333647	2.08889	0.147608
Sh3bgr__chr16	0.0892831	0.186367	2.08737	0.0854036
Txlnb__chr10	0.113741	0.236632	2.08044	0.1075
Ndufc1__chr3	0.220182	0.457722	2.07883	0.197612
Ndufa11__chr17	0.181655	0.37745	2.07784	0.166097
2310061I04Rik__chr17	0.103096	0.214091	2.07662	0.097949
Apbb1__chr7	0.0835377	0.173444	2.07624	0.0801343
Ccng1__chr11	0.207506	0.42984	2.07145	0.187377
Ubr3__chr2	0.113894	0.235486	2.06759	0.107636
Fyco1__chr9	0.119814	0.247687	2.06726	0.112903
Ndufs7__chr10	0.167692	0.346229	2.06467	0.154372
Apobec2__chr17	0.101144	0.207884	2.05533	0.0961865
Sdhd__chr9	0.12767	0.262374	2.05509	0.119844
Fh1__chr1	0.117472	0.240795	2.04982	0.110823
Kcnj12__chr11	0.0711534	0.14568	2.0474	0.0686728
Acsl1__chr8	0.121436	0.248263	2.04439	0.11434
Vdac1__chr11	0.217196	0.443707	2.04289	0.195213
Dlst__chr12	0.152581	0.310695	2.03626	0.141498
Xirp2__chr2	0.307698	0.626518	2.03614	0.264849
Cpt2__chr4	0.0895612	0.182288	2.03535	0.0856579
Uqcr11__chr10	0.174393	0.354921	2.03518	0.160019
Mpc1__chr17	0.144148	0.2931	2.03333	0.134227
Mapt__chr11	0.0903945	0.183686	2.03204	0.0864195
Cpeb3__chr19	0.0769371	0.15626	2.03102	0.0740432
Echs1__chr7	0.114054	0.231593	2.03055	0.107779
Acox1__chr11	0.105948	0.214607	2.02558	0.100518
Pdlim5__chr3	0.225031	0.455071	2.02226	0.201493
Ndufa10__chr1	0.17516	0.354059	2.02135	0.160663
Ube2b__chr11	0.188502	0.380394	2.01798	0.171787
Xirp1__chr9	0.0819379	0.165094	2.01487	0.0786617
Dag1__chr9	0.144833	0.291756	2.01442	0.134821
Fam20b__chr1	0.0996012	0.200616	2.01419	0.0947912
Ndufb2__chr6	0.14453	0.289388	2.00226	0.134558
Laptm4b__chr15	0.0908745	0.181807	2.00064	0.0868578
Gnpat__chr8	0.111317	0.222371	1.99764	0.105334
Mrps35__chr6	0.0837392	0.166484	1.98812	0.0803196
Trim63__chr4	0.0990337	0.196733	1.98653	0.0942774
Sorbs2__chr8	0.109957	0.218348	1.98577	0.104116
Chchd2__chr5	0.656039	1.29608	1.97561	0.140625
Dsg2__chr18	0.0793063	0.156644	1.97518	0.0762341
Jam2__chr16	0.133786	0.263863	1.97228	0.12521
Hipk3__chr2	0.136561	0.268771	1.96813	0.127634
Slc20a2__chr8	0.0938424	0.18399	1.96063	0.0895637
Macrod1__chr19	0.100407	0.196498	1.95701	0.0955204
Cacna1c__chr6	0.0839342	0.164226	1.9566	0.080499
Slc25a12__chr2	0.117917	0.230326	1.9533	0.111218
Acacb__chr5	0.0853315	0.166358	1.94955	0.0817827
Atp5d__chr10	0.305029	0.594378	1.94859	0.262884
Usp13__chr3	0.0946188	0.184295	1.94777	0.0902702
Myh14__chr7	0.075157	0.145901	1.94128	0.0723936
Lpin1__chr12	0.097509	0.189166	1.93999	0.0928955
Bckdha__chr7	0.0953069	0.184773	1.93872	0.0908959
Kcnip2__chr19	0.0909751	0.175272	1.92659	0.0869497
Chpt1__chr10	0.111037	0.212964	1.91795	0.105083
Klhl31__chr9	0.0943177	0.180824	1.91718	0.0899963
Gmpr__chr13	0.0914696	0.175251	1.91595	0.087401
Rpl3l__chr17	0.104464	0.200146	1.91593	0.0991824
Myo18a__chr11	0.117675	0.225351	1.91503	0.111003
Gstm1__chr3	0.185557	0.355269	1.91461	0.169344
Pacsin3__chr2	0.0857262	0.164018	1.91327	0.0821451
Ivns1abp__chr1	0.183486	0.350969	1.91279	0.167622
Plin5__chr17	0.0848804	0.16235	1.9127	0.0813685
Clasp1__chr1	0.133449	0.255094	1.91155	0.124915
Dhrs7c__chr11	0.0820891	0.156771	1.90976	0.078801
Tacc2__chr7	0.094693	0.180767	1.90898	0.0903377
Slco3a1__chr7	0.103271	0.196923	1.90686	0.0981063
Rilpl1__chr5	0.0937927	0.17863	1.90452	0.0895184
Rabgap1l__chr1	0.0809814	0.154035	1.9021	0.0777801
Slc25a11__chr11	0.163285	0.309955	1.89824	0.150637
Nudt8__chr19	0.0827227	0.157018	1.89813	0.0793844
Clip4__chr17	0.0916472	0.173833	1.89676	0.0875631
Entpd5__chr12	0.086253	0.163451	1.89502	0.0826284
Gpr146__chr5	0.0946896	0.179351	1.8941	0.0903346
Uqcrq__chr11	0.385716	0.730496	1.89387	0.320025
Ndufa8__chr2	0.179221	0.339416	1.89385	0.164064
Ndufc2__chr7	0.219285	0.414918	1.89214	0.196892
Uqcc__chr2	0.0849514	0.160729	1.89202	0.0814337
Ghitm__chr14	0.180169	0.340662	1.8908	0.164856
Ndufs8__chr19	0.115549	0.218053	1.88711	0.109112
Atp1a1__chr3	0.250959	0.473479	1.88668	0.22193
Cd209c__chr8	0.100796	0.189854	1.88355	0.0958717
Tfrc__chr16	0.0871376	0.164039	1.88252	0.0834395
Sgcb__chr5	0.0955662	0.17921	1.87525	0.0911316
Phb__chr11	0.162192	0.30354	1.87149	0.149708
Pnpla2__chr7	0.143045	0.266852	1.86551	0.133272
Pkia__chr3	0.0924851	0.171653	1.856	0.0883273
Hspa9__chr18	0.168244	0.31217	1.85546	0.154839
Apoo__chrX	0.0856974	0.158813	1.85318	0.0821186
Sbk1__chr7	0.0778994	0.144191	1.85099	0.0749337
Mypn__chr10	0.0791684	0.146524	1.85079	0.0761068
Itfg3__chr17	0.10416	0.192676	1.84982	0.0989077
Cyfip2__chr11	0.0913198	0.16886	1.84911	0.0872644
Aldoa__chr7	0.842856	1.55819	1.84871	0.206633
Zfp651__chr9	0.0862559	0.159183	1.84548	0.0826311
Slc38a3__chr9	0.0784726	0.144473	1.84107	0.0754638
Ndufv2__chr17	0.202554	0.372319	1.83812	0.183342
Agl__chr3	0.112563	0.206412	1.83374	0.106448
Doc2g__chr19	0.0955512	0.175092	1.83244	0.0911179
Tmem109__chr19	0.144761	0.264674	1.82836	0.134758
Ndufb6__chr4	0.177966	0.325203	1.82733	0.163015
Rabac1__chr7	0.183225	0.334772	1.82711	0.167405
Prdx3__chr19	0.126189	0.230136	1.82374	0.11854
Sptb__chr12	0.0790704	0.144095	1.82236	0.0760162
Lynx1__chr15	0.0911971	0.16607	1.821	0.0871524
Chchd3__chr6	0.124917	0.227263	1.81932	0.117417
B230120H23Rik__chr2	0.128903	0.234199	1.81686	0.120928
Kif1b__chr4	0.128061	0.232017	1.81177	0.120188
Casz1__chr4	0.0816823	0.147875	1.81036	0.0784262
Fam210a__chr18	0.0932458	0.168372	1.80568	0.0890204
Mlf1__chr3	0.0926142	0.166921	1.80233	0.0884449
Cd99l2__chrX	0.0938078	0.168781	1.79922	0.0895322
Tmem63b__chr17	0.0887946	0.159565	1.79701	0.0849568
Sord__chr2	0.107094	0.192418	1.79672	0.101548
Fblim1__chr4	0.126488	0.227155	1.79587	0.118803
Alpk2__chr18	0.0730376	0.131022	1.7939	0.0704258
Erlec1__chr11	0.0909593	0.163047	1.79253	0.0869352
AI314180__chr4	0.112956	0.202283	1.79082	0.106798
Cmss1__chr16	0.0719485	0.128089	1.78028	0.0694129
Tuba8__chr6	0.0847226	0.150667	1.77836	0.0812235
Sdhc__chr1	0.160085	0.283445	1.77059	0.147915
Cand2__chr6	0.0824573	0.145844	1.76872	0.0791401
Trak2__chr1	0.117988	0.208469	1.76687	0.111281
Hsdl2__chr4	0.0880526	0.155147	1.76198	0.0842776
Inpp5a__chr7	0.0962561	0.169351	1.75938	0.0917584
Nenf__chr1	0.10434	0.183394	1.75765	0.0990706
Adamtsl5__chr10	0.0804019	0.141302	1.75744	0.0772456
Unc45b__chr11	0.111662	0.196229	1.75735	0.105642
Cdh13__chr8	0.101256	0.177598	1.75395	0.0962875
Fkbp4__chr6	0.195368	0.34263	1.75377	0.177453
Rbm20__chr19	0.07891	0.138367	1.75348	0.075868
Gstk1__chr6	0.0794439	0.138801	1.74715	0.0763613
Uqcrb__chr13	0.221438	0.386817	1.74684	0.19862
Malat1__chr19	2.73585	4.77334	1.74474	0.142278
Stom__chr2	0.122193	0.212964	1.74285	0.11501
Ndufb3__chr1	0.167743	0.291978	1.74063	0.154415
Lbh__chr17	0.19349	0.336768	1.74049	0.175907
Auh__chr13	0.0797405	0.138465	1.73645	0.0766351
Ank__chr15	0.108547	0.187768	1.72983	0.102852
Tmem205__chr9	0.0889976	0.153818	1.72834	0.0851425
Me1__chr9	0.0898783	0.15488	1.72322	0.0859478
Ctsf__chr19	0.0723317	0.124495	1.72117	0.0697694
Acss1__chr2	0.0902516	0.155155	1.71914	0.086289
Atp5j2__chr5	0.246897	0.423916	1.71698	0.218764
Pomgnt1__chr4	0.0872073	0.149433	1.71353	0.0835033
Tmem201__chr4	0.0990735	0.169747	1.71334	0.0943134
Atp5k__chr5	0.292711	0.500702	1.71057	0.253748
Kremen1__chr11	0.0838551	0.143209	1.70782	0.0804263
Tnni3k__chr3	0.0815232	0.139053	1.70568	0.0782796
Smpx__chrX	0.142096	0.242297	1.70517	0.132449
Pcmtd1__chr1	0.121229	0.206462	1.70307	0.114157
Parm1__chr5	0.0787839	0.133907	1.69967	0.0757515
Ndufb7__chr8	0.173727	0.294744	1.69659	0.15946
Ppapdc3__chr2	0.0721331	0.122338	1.69601	0.0695846
Cd300lg__chr11	0.152816	0.259101	1.69551	0.141699
Emc10__chr7	0.127563	0.215988	1.69319	0.11975
Map7d1__chr4	0.154056	0.260795	1.69285	0.142763
Ttc3__chr16	0.117449	0.198734	1.69208	0.110803
Cd81__chr7	0.353882	0.598721	1.69187	0.29803
Phtf2__chr5	0.0794495	0.134396	1.69159	0.0763664
Pm20d2__chr4	0.0847664	0.143321	1.69077	0.0812638
Fam189a2__chr19	0.0766719	0.129571	1.68994	0.0737976
Ttc17__chr2	0.0812696	0.137235	1.68863	0.0780458
Afap1l1__chr18	0.0976989	0.164967	1.68853	0.0930677
Msi2__chr11	0.106869	0.180441	1.68844	0.101345
Sdpr__chr1	0.23229	0.39194	1.68729	0.207269
Ecsit__chr9	0.102886	0.173487	1.68621	0.0977591
Myzap__chr9	0.101107	0.169811	1.67952	0.096153
Adcy6__chr15	0.0928381	0.155897	1.67924	0.088649
Epha4__chr1	0.0777864	0.130531	1.67807	0.0748292
Perp__chr10	0.0849804	0.14249	1.67674	0.0814604
Ppp1r3c__chr19	0.0889633	0.14911	1.67608	0.0851112
C130080G10Rik__chr2	0.0866052	0.144705	1.67086	0.0829514
Smim19__chr8	0.0890485	0.148726	1.67016	0.0851891
Popdc3__chr10	0.0705326	0.117768	1.66969	0.0680945
Fam195a__chr17	0.0819867	0.13683	1.66893	0.0787067
Pmpcb__chr5	0.105418	0.175557	1.66534	0.100041
Stard7__chr2	0.114425	0.190554	1.66531	0.10811
Herpud1__chr8	0.10708	0.178288	1.665	0.101535
Polr2m__chr9	0.163556	0.272306	1.66491	0.150867
2610507B11Rik__chr11	0.172238	0.286225	1.6618	0.158207
Atpaf1__chr4	0.0768139	0.127573	1.66081	0.0739292
Coq7__chr7	0.0981652	0.162969	1.66015	0.0934905
Dlat__chr9	0.122812	0.203615	1.65794	0.115558
Dynll2__chr11	0.178486	0.295894	1.6578	0.16345
Bri3bp__chr5	0.102864	0.170448	1.65703	0.0977397
Tom1l2__chr11	0.0864772	0.142944	1.65297	0.0828341
Laptm4a__chr12	0.334146	0.551476	1.6504	0.284038
Pcmt1__chr10	0.092889	0.153188	1.64915	0.0886954
Neat1__chr19	0.388137	0.63926	1.647	0.321669
Scamp3__chr3	0.125978	0.207258	1.64519	0.118354
Myadml2__chr11	0.0796713	0.131039	1.64475	0.0765712
Samm50__chr15	0.138472	0.227631	1.64388	0.129299
Pde1c__chr6	0.0719948	0.11825	1.64248	0.069456
Fgf1__chr18	0.0935473	0.15362	1.64217	0.089295
Tmbim4__chr10	0.108448	0.178021	1.64153	0.102764
Nfib__chr4	0.237178	0.388821	1.63937	0.211134
Agpat2__chr2	0.0866892	0.141813	1.63588	0.0830285
Flnc__chr6	0.0904514	0.147891	1.63503	0.0864715
Scgb1c1__chr7	0.0697186	0.113863	1.63318	0.0673357
Stau2__chr1	0.0736607	0.120045	1.6297	0.0710047
Cdc34__chr10	0.150041	0.244298	1.62821	0.139314
Tsc22d1__chr14	0.165218	0.268963	1.62793	0.152277
Creld1__chr6	0.081442	0.132519	1.62716	0.0782048
Pcnt__chr10	0.0858388	0.139086	1.62032	0.0822484
Arhgef12__chr9	0.126031	0.204047	1.61903	0.1184
Rbm24__chr13	0.0868929	0.140677	1.61897	0.0832152
D10Jhu81e__chr10	0.0993542	0.160405	1.61448	0.0945676
Atp5l__chr9	0.34016	0.548151	1.61145	0.28833
Sptbn1__chr11	0.377412	0.607231	1.60894	0.314355
Ndufs4__chr13	0.128058	0.205833	1.60734	0.120186
Bfar__chr16	0.115031	0.184698	1.60564	0.10865
Oaz2__chr9	0.12514	0.20091	1.60548	0.117614
Ptpla__chr2	0.099155	0.159025	1.60381	0.0943872
Bag3__chr7	0.115614	0.185385	1.60349	0.109169
Fsd2__chr7	0.0843355	0.134863	1.59912	0.0808678
Ivd__chr2	0.0876312	0.14	1.5976	0.0838917
Me3__chr7	0.073788	0.11782	1.59673	0.071123
March2__chr17	0.11311	0.180526	1.59603	0.106936
Gpr22__chr12	0.0725896	0.11584	1.59582	0.0700093
Tmem106b__chr6	0.103915	0.165745	1.59501	0.0986872
Mrpl42__chr10	0.170901	0.272588	1.595	0.157081
Clybl__chr14	0.0862443	0.137467	1.59393	0.0826204
Ndufaf4__chr4	0.0963668	0.153507	1.59294	0.0918589
Atad1__chr19	0.107723	0.170976	1.58718	0.102113
Ugp2__chr11	0.14754	0.234075	1.58651	0.137159
Ifngr2__chr16	0.223817	0.355005	1.58614	0.200524
Camta1__chr4	0.112758	0.178834	1.586	0.106622
Slc25a13__chr6	0.0858289	0.136087	1.58556	0.0822393
Vegfa__chr17	0.155275	0.246091	1.58487	0.143807
Homer2__chr7	0.0911576	0.144395	1.58402	0.0871163
Slc7a1__chr5	0.0938732	0.148557	1.58253	0.0895917
Hspa5__chr2	0.7126	1.12755	1.5823	0.160143
Mrpl12__chr11	0.13347	0.211154	1.58203	0.124934
Cnst__chr1	0.0767638	0.121432	1.58189	0.0738828
Tcta__chr9	0.0824306	0.130386	1.58176	0.0791155
Ppargc1b__chr18	0.0792282	0.12529	1.58138	0.076162
Alpk3__chr7	0.0765608	0.120982	1.5802	0.0736948
Abcb6__chr1	0.069585	0.109879	1.57906	0.0672111
Lmod3__chr6	0.0764585	0.120443	1.57528	0.0736
Acad8__chr9	0.0784004	0.123407	1.57406	0.075397
Vwa8__chr14	0.0867013	0.136389	1.57309	0.0830395
March6__chr15	0.113444	0.178409	1.57266	0.107234
Akap1__chr11	0.0829248	0.130254	1.57075	0.0795704
Lrrc4b__chr7	0.0677849	0.106387	1.56948	0.0655307
Cfl2__chr12	0.152206	0.23871	1.56834	0.141175
Mid1ip1__chrX	0.107013	0.167388	1.56419	0.101475
Ubr2__chr17	0.102272	0.159958	1.56405	0.097205
Ptp4a3__chr15	0.198591	0.31056	1.56382	0.1801
Syngr2__chr11	0.141804	0.221706	1.56347	0.132196
Suclg2__chr6	0.0789709	0.123405	1.56266	0.0759243
Ptcd3__chr6	0.0980855	0.153224	1.56215	0.0934182
Slc25a20__chr9	0.0933788	0.145842	1.56183	0.0891415
Tmem161a__chr8	0.0978374	0.1528	1.56178	0.0931933
Abcb8__chr5	0.0805163	0.125608	1.56003	0.0773511
Actr3b__chr5	0.0706248	0.110011	1.55769	0.0681804
Rock2__chr12	0.158843	0.247312	1.55696	0.146856
Kcnj5__chr9	0.0714909	0.111138	1.55457	0.068987
Htatsf1__chrX	0.0988638	0.153504	1.55268	0.0941235
Ndufv3__chr17	0.159129	0.246847	1.55124	0.1471
Kat2b__chr17	0.0955341	0.148154	1.5508	0.0911025
Mfge8__chr7	0.151929	0.235554	1.55043	0.140937
Prune2__chr19	0.084009	0.130191	1.54973	0.0805677
Mical3__chr6	0.0757812	0.117421	1.54948	0.0729724
Mrps23__chr11	0.106978	0.165512	1.54715	0.101444
Bdh1__chr16	0.0743605	0.115037	1.54701	0.0716546
Gpx4__chr10	0.340553	0.526703	1.54661	0.28861
Ctnna1__chr18	0.205604	0.317941	1.54638	0.185829
Tfdp2__chr9	0.0771617	0.119316	1.54631	0.0742511
Tspan9__chr6	0.137449	0.212524	1.5462	0.128409
Rmdn1__chr4	0.0757916	0.117176	1.54603	0.0729821
2700089E24Rik__chr6	0.113137	0.174614	1.54339	0.10696
Prob1__chr18	0.0747654	0.11535	1.54283	0.0720303
Nudt3__chr17	0.11847	0.18249	1.54039	0.11171
Mtus1__chr8	0.112878	0.173788	1.5396	0.106729
2900097C17Rik__chr2	0.194398	0.299105	1.53862	0.176655
Mmp15__chr8	0.081795	0.125841	1.53849	0.0785301
Rnf139__chr15	0.0834152	0.128313	1.53825	0.0800216
2410127L17Rik__chr19	0.0894266	0.137269	1.53499	0.0855348
Nt5dc3__chr10	0.0785472	0.120498	1.53408	0.0755327
Acad11__chr9	0.079433	0.121822	1.53365	0.0763512
Uqcr10__chr11	0.170473	0.261246	1.53248	0.15672
2010107E04Rik__chr12	0.248341	0.380574	1.53246	0.219891
Tufm__chr7	0.111155	0.17008	1.53012	0.105188
C1qtnf9__chr14	0.0912907	0.139621	1.52941	0.0872378
St3gal5__chr6	0.119285	0.182374	1.52889	0.112433
Atp5e__chr2	0.285846	0.436982	1.52873	0.248607
Adra1b__chr11	0.075513	0.115437	1.5287	0.0727238
Lama5__chr2	0.0902403	0.13785	1.52759	0.0862786
Bzw2__chr12	0.102867	0.156868	1.52496	0.0977424
Fbxo32__chr15	0.0892266	0.135865	1.52269	0.085352
Slc35f5__chr1	0.0912383	0.138823	1.52154	0.0871899
Dhrs4__chr14	0.0920092	0.13985	1.51996	0.0878933
Rhot2__chr17	0.0855466	0.12985	1.51789	0.0819802
Ptcd2__chr13	0.0856919	0.130003	1.5171	0.0821136
Ramp1__chr1	0.0706255	0.107053	1.51578	0.068181
Tesc__chr5	0.0821394	0.124454	1.51515	0.0788473
Syt7__chr19	0.0824525	0.124843	1.51412	0.0791356
Comt__chr16	0.159678	0.241763	1.51407	0.147568
Rasl10b__chr11	0.074514	0.112646	1.51174	0.071797
Lonp1__chr17	0.102558	0.154924	1.51061	0.0974631
Sypl__chr12	0.161088	0.243292	1.5103	0.148769
Pcyox1__chr6	0.110602	0.166991	1.50985	0.104693
Stk39__chr2	0.107377	0.16212	1.50982	0.101802
Mff__chr1	0.126992	0.191731	1.50979	0.119247
Hibadh__chr6	0.125419	0.189058	1.50741	0.117861
C030006K11Rik__chr15	0.0782588	0.117757	1.50471	0.0752661
Atf6__chr1	0.113094	0.170002	1.50318	0.106922
Smpd2__chr10	0.0775779	0.116503	1.50175	0.0746363
Slc2a8__chr2	0.072216	0.108443	1.50165	0.0696618
Cers4__chr8	0.0895033	0.13438	1.5014	0.085605
Mov10l1__chr15	0.0744782	0.111798	1.50109	0.0717638
Alas1__chr9	0.101973	0.153038	1.50077	0.0969352
Dtna__chr18	0.0710994	0.106697	1.50067	0.0686225
Plcb4__chr2	0.0754433	0.113204	1.50052	0.0726591
Sar1b__chr11	0.119872	0.179737	1.49941	0.112954
Ndufb4__chr16	0.164417	0.246521	1.49937	0.151598
Pbxip1__chr3	0.152108	0.227849	1.49794	0.141091
Ptpn11__chr5	0.139881	0.209515	1.49781	0.130526
Leprel4__chr11	0.098082	0.146885	1.49758	0.0934151
Ppp1r3a__chr6	0.0770061	0.115122	1.49498	0.0741071
Fam213b__chr4	0.090214	0.134866	1.49496	0.0862546
Mfhas1__chr8	0.128387	0.19188	1.49455	0.120474
Rnf128__chrX	0.123269	0.184154	1.49392	0.115962
Gfm1__chr3	0.0833389	0.124488	1.49376	0.0799514
Tmem218__chr9	0.0689292	0.102916	1.49306	0.0665992
Nrd1__chr4	0.146336	0.218471	1.49295	0.136119
Gja3__chr14	0.0682217	0.101803	1.49224	0.0659387
Vdac2__chr14	0.299257	0.446452	1.49187	0.258617
Tsc2__chr17	0.100467	0.149818	1.49122	0.0955748
Dld__chr12	0.11547	0.172139	1.49076	0.109041
Uqcrh__chr4	0.234808	0.349907	1.49018	0.209263
Aamdc__chr7	0.0820956	0.122309	1.48984	0.078807
Fbxl22__chr9	0.0834093	0.124232	1.48942	0.0800162
Gcdh__chr8	0.0759988	0.113186	1.48932	0.073174
Ucp3__chr7	0.0722172	0.107477	1.48825	0.0696629
Immt__chr6	0.148981	0.22167	1.48791	0.138401
Serinc1__chr10	0.17155	0.255178	1.48748	0.157628
Agtrap__chr4	0.0942328	0.140115	1.4869	0.089919
Ociad1__chr5	0.137718	0.204753	1.48676	0.128643
Sccpdh__chr1	0.0862217	0.128169	1.4865	0.0825997
Clcn4-2__chr7	0.149528	0.222255	1.48638	0.138872
Ephb3__chr16	0.0726431	0.107882	1.4851	0.070059
Asb15__chr6	0.0730329	0.108459	1.48507	0.0704214
Asb14__chr14	0.0744077	0.110456	1.48447	0.0716984
Agtpbp1__chr13	0.101184	0.15018	1.48423	0.0962227
Cav3__chr6	0.0808805	0.119906	1.48251	0.0776871
Coq3__chr4	0.0780869	0.115564	1.47994	0.0751072
Aes__chr10	0.371546	0.54949	1.47893	0.310321
Kcnh2__chr5	0.0753025	0.111235	1.47718	0.0725285
Hk1__chr10	0.127641	0.188447	1.47639	0.119818
Wfdc1__chr8	0.0709965	0.104806	1.47622	0.0685266
Pdf__chr8	0.103536	0.152841	1.4762	0.0983459
Nebl__chr2	0.0705056	0.104039	1.47562	0.0680693
Sdr39u1__chr14	0.0959482	0.141569	1.47548	0.0914787
Myl1__chr1	0.0745388	0.109937	1.4749	0.0718201
Amotl1__chr9	0.125826	0.185525	1.47445	0.11822
Tmem70__chr1	0.097432	0.143653	1.47439	0.0928256
Prrc2b__chr2	0.126731	0.186303	1.47007	0.119017
Rdh14__chr12	0.0786683	0.115616	1.46966	0.0756446
Srpk2__chr5	0.0954026	0.140204	1.4696	0.090983
Ltbp1__chr17	0.0898546	0.132031	1.46938	0.0859262
Tm2d3__chr7	0.0850594	0.124981	1.46933	0.0815329
Pdhx__chr2	0.0892028	0.130912	1.46757	0.0853302
Limch1__chr5	0.115887	0.170067	1.46752	0.109412
Atraid__chr5	0.100418	0.147325	1.46711	0.0955304
Ehbp1__chr11	0.0825964	0.121105	1.46623	0.0792681
Smyd2__chr1	0.107712	0.157915	1.46609	0.102102
Mylk4__chr13	0.0836175	0.12255	1.46561	0.0802077
Kcnq1__chr7	0.0750546	0.109968	1.46517	0.0722987
Arfgef1__chr1	0.105189	0.154099	1.46498	0.0998344
Pdrg1__chr2	0.101852	0.149173	1.46461	0.096826
Phyhd1__chr2	0.0818208	0.119741	1.46346	0.0785539
Ppara__chr15	0.079895	0.116804	1.46197	0.0767778
P2rx5__chr11	0.0673179	0.0983546	1.46105	0.0650942
Cox6b1__chr7	0.316872	0.462794	1.46051	0.271562
Smtn__chr11	0.13417	0.195934	1.46034	0.125546
Nr1d2__chr14	0.10993	0.160392	1.45903	0.104092
Ptges3l__chr11	0.071094	0.103644	1.45784	0.0686175
Mlip__chr9	0.0757338	0.110357	1.45717	0.0729284
Ap4s1__chr12	0.0859555	0.125247	1.45711	0.0823555
Pla2g16__chr19	0.0977497	0.142403	1.45682	0.0931138
Ppm1a__chr12	0.112034	0.163174	1.45647	0.105975
Ndufa6__chr15	0.188339	0.274203	1.4559	0.171652
Thrsp__chr7	0.0757892	0.110295	1.45529	0.0729798
Prkaca__chr8	0.12906	0.187817	1.45528	0.121066
Clic5__chr17	0.125101	0.182034	1.4551	0.11758
Gm10336__chr13	0.0859487	0.125006	1.45443	0.0823492
Ankrd40__chr11	0.132703	0.192973	1.45417	0.124262
Sparcl1__chr5	0.353915	0.514578	1.45396	0.298052
Lpgat1__chr1	0.113422	0.164905	1.45391	0.107215
Grpel1__chr5	0.115363	0.167555	1.45242	0.108945
Ppm1b__chr17	0.105604	0.153376	1.45237	0.100208
Tm9sf2__chr14	0.169526	0.246117	1.4518	0.155921
Tspan7__chrX	0.152986	0.22205	1.45144	0.141845
Raph1__chr1	0.117367	0.170323	1.4512	0.11073
Slc22a5__chr11	0.0718598	0.104237	1.45055	0.0693304
Pccb__chr9	0.0929011	0.134639	1.44928	0.0887064
Hspb1__chr5	0.27227	0.394147	1.44763	0.238337
Arl6ip5__chr6	0.0997109	0.144166	1.44584	0.0948905
Mrpl41__chr2	0.0913779	0.13211	1.44576	0.0873174
Adipor2__chr6	0.105898	0.153101	1.44574	0.100473
Map1lc3b__chr8	0.197379	0.285356	1.44573	0.179106
Bag6__chr17	0.129885	0.187763	1.44561	0.121791
Pi4ka__chr16	0.0942608	0.13616	1.4445	0.0899445
Tmx1__chr12	0.123345	0.178086	1.4438	0.11603
Mlycd__chr8	0.0848877	0.12256	1.44379	0.0813752
Abhd16a__chr17	0.100437	0.144759	1.44129	0.0955474
Abcc8__chr7	0.0736435	0.10614	1.44127	0.0709887
Itga9__chr9	0.091272	0.131411	1.43977	0.0872207
Lrrc14b__chr13	0.0751142	0.108087	1.43897	0.0723539
Aldh4a1__chr4	0.0816427	0.117481	1.43896	0.0783897
Wdtc1__chr4	0.0802442	0.115467	1.43895	0.0771001
Crhr2__chr6	0.0665609	0.0956727	1.43737	0.0643863
Smim13__chr13	0.0902197	0.129556	1.436	0.0862598
Ormdl3__chr11	0.082986	0.119162	1.43593	0.0796267
Fastk__chr5	0.0862368	0.123823	1.43585	0.0826135
Zyg11b__chr4	0.101044	0.145072	1.43572	0.0960966
Pigp__chr16	0.110607	0.158566	1.4336	0.104698
Strip2__chr6	0.0740346	0.106083	1.43289	0.071352
Bola3__chr6	0.111484	0.159731	1.43277	0.105483
Dnajc15__chr14	0.0940375	0.134709	1.4325	0.0897413
Bcl2l13__chr6	0.0797472	0.114196	1.43198	0.0766413
Ntn1__chr11	0.0767777	0.109918	1.43164	0.0738956
Cd164__chr10	0.159539	0.228307	1.43104	0.14745
Pla2g12a__chr3	0.0892078	0.127565	1.42998	0.0853348
Cap2__chr13	0.0813208	0.116286	1.42997	0.0780931
Thra__chr11	0.0797867	0.114041	1.42933	0.0766777
Samd4__chr14	0.0921417	0.131521	1.42737	0.0880141
Dnaja3__chr16	0.109982	0.156956	1.4271	0.104139
Ptprb__chr10	0.152612	0.217695	1.42647	0.141523
Tmem60__chr5	0.0809343	0.115439	1.42633	0.0777366
Osbp__chr19	0.0956701	0.136418	1.42592	0.091226
Carns1__chr19	0.0776586	0.110726	1.42581	0.074711
Srpr__chr9	0.116975	0.166542	1.42374	0.110381
Htra1__chr7	0.0922785	0.131284	1.42269	0.0881389
Rrad__chr8	0.0849191	0.120794	1.42246	0.0814041
Cspg4__chr9	0.0734929	0.10454	1.42245	0.0708489
Slc30a9__chr5	0.107886	0.15342	1.42205	0.102259
Pnpla8__chr12	0.0926116	0.131627	1.42128	0.0884425
Murc__chr4	0.0756719	0.107426	1.41962	0.0728711
Timp4__chr6	0.0836822	0.118785	1.41948	0.0802673
Insr__chr8	0.0857957	0.121778	1.4194	0.0822088
Plxnb1__chr9	0.072474	0.102864	1.41932	0.0699018
Kif13a__chr13	0.0876429	0.124373	1.41909	0.0839025
Pdk1__chr2	0.095922	0.136089	1.41875	0.0914549
Rap1gap__chr4	0.0687095	0.0973953	1.41749	0.0663942
Ppm1l__chr3	0.0715897	0.101465	1.41732	0.069079
Hsd17b10__chrX	0.110055	0.155794	1.41561	0.104204
Dirc2__chr16	0.0871248	0.123285	1.41503	0.0834278
Cited4__chr4	0.0722083	0.102136	1.41446	0.0696546
Tmem53__chr4	0.0704127	0.0995209	1.41339	0.0679828
Vamp2__chr11	0.104772	0.148005	1.41264	0.0994593
Lyrm9__chr11	0.0746363	0.105324	1.41117	0.0719105
Epb4.1__chr4	0.0912151	0.128651	1.41042	0.0871688
Gpsm1__chr2	0.0802221	0.113126	1.41016	0.0770797
Dysf__chr6	0.0971555	0.136989	1.40999	0.0925748
Dmd__chrX	0.0950835	0.134013	1.40942	0.0906928
Kxd1__chr8	0.0916342	0.129143	1.40934	0.0875512
Pfkfb2__chr1	0.0864206	0.121749	1.4088	0.0827821
Tbc1d4__chr14	0.0820747	0.115597	1.40843	0.0787878
Aox1__chr1	0.0679375	0.0956556	1.408	0.0656732
Grm1__chr10	0.0743063	0.104622	1.40799	0.0716043
Plec__chr15	0.23871	0.336053	1.40779	0.212342
Dcaf6__chr1	0.0734026	0.103302	1.40734	0.070765
Emp2__chr16	0.0877592	0.123316	1.40517	0.0840089
Cops4__chr5	0.0952889	0.13386	1.40478	0.0908795
Clip1__chr5	0.0930309	0.130684	1.40473	0.0888247
Adcy9__chr16	0.0743758	0.104471	1.40463	0.0716687
Twf2__chr9	0.105466	0.148097	1.40421	0.100084
Qk__chr17	0.268843	0.377255	1.40325	0.235722
Galt__chr4	0.0794847	0.111484	1.40258	0.0763989
Fam101b__chr11	0.131779	0.184705	1.40163	0.123453
Acads__chr5	0.0910547	0.127603	1.40138	0.0870224
Esrra__chr19	0.0886251	0.124179	1.40117	0.0848017
Rnf207__chr4	0.0762097	0.106777	1.4011	0.0733695
Cidea__chr18	0.0757719	0.106086	1.40006	0.0729638
Atp11a__chr8	0.0915126	0.128104	1.39985	0.0874403
Pttg1__chr11	0.0991687	0.138818	1.39982	0.0943996
Vdac3__chr8	0.188066	0.263214	1.39959	0.171425
Ehd4__chr2	0.213734	0.298986	1.39887	0.192421
Cpped1__chr16	0.0795906	0.11131	1.39853	0.0764968
Pja2__chr17	0.112644	0.157531	1.39848	0.10652
Ghr__chr15	0.0957787	0.133877	1.39777	0.0913247
Fundc2__chrX	0.12785	0.178677	1.39755	0.120002
Gys1__chr7	0.0936685	0.130881	1.39728	0.0894054
Nomo1__chr7	0.137036	0.191436	1.39698	0.128049
2610507I01Rik__chr11	0.0740309	0.103419	1.39697	0.0713485
Asb8__chr15	0.0902011	0.125963	1.39647	0.0862428
Pard3__chr8	0.0832934	0.116267	1.39587	0.0799096
Fam214a__chr9	0.0758227	0.105827	1.39572	0.0730109
Mrpl51__chr6	0.142278	0.198576	1.39569	0.132607
Hint2__chr4	0.0950826	0.132636	1.39495	0.0906921
Ppm1k__chr6	0.0816597	0.113818	1.39381	0.0784054
Pnkd__chr1	0.104591	0.145668	1.39273	0.0992965
Pam16__chr16	0.0911291	0.126866	1.39215	0.0870903
Zfyve27__chr19	0.0755357	0.105126	1.39174	0.0727448
Cdkn1c__chr7	0.100132	0.139326	1.39141	0.0952719
Myh7b__chr2	0.0742678	0.103293	1.39081	0.0715685
P4htm__chr9	0.0704434	0.097927	1.39015	0.0680114
Ppa2__chr3	0.0889638	0.123635	1.38972	0.0851116
Mapk8ip3__chr17	0.0863304	0.119945	1.38937	0.0826994
Zmynd11__chr13	0.153533	0.213185	1.38853	0.142314
Glg1__chr8	0.140908	0.195591	1.38807	0.131418
Ndufa2__chr18	0.211212	0.293085	1.38763	0.190383
Nudt7__chr8	0.0772934	0.10723	1.38731	0.074373
Slc25a34__chr4	0.0717058	0.0994709	1.38721	0.069187
Ptges2__chr2	0.0766825	0.106297	1.3862	0.0738075
Emc9__chr14	0.0750529	0.103992	1.38558	0.072297
Aqp1__chr6	0.160741	0.222678	1.38532	0.148474
Scp2__chr4	0.16968	0.235027	1.38512	0.156051
Fbxo31__chr8	0.0782372	0.10824	1.38348	0.0752462
Ehbp1l1__chr19	0.180377	0.249518	1.38331	0.165031
Ash1l__chr3	0.111986	0.154868	1.38293	0.105932
Paqr7__chr4	0.0799688	0.11056	1.38253	0.0768459
Ndufa7__chr17	0.15863	0.219119	1.38132	0.146674
Sfrs18__chr4	0.1327	0.183293	1.38126	0.12426
Rilp__chr11	0.0737382	0.101839	1.38109	0.0710767
Ogn__chr13	0.124374	0.171737	1.38082	0.116938
Fam213a__chr14	0.0713592	0.0985294	1.38075	0.0688644
Tecrl__chr5	0.0735543	0.101516	1.38014	0.0709059
Shroom3__chr5	0.071919	0.0992097	1.37946	0.0693855
Kcna2__chr3	0.0702165	0.0968532	1.37935	0.0677999
Mlxipl__chr5	0.0776931	0.107062	1.37801	0.0747429
Tmem69__chr4	0.0998563	0.137568	1.37766	0.0950221
Ptprm__chr17	0.0886457	0.122112	1.37752	0.0848205
Nudt6__chr3	0.0727708	0.100195	1.37686	0.0701778
Klf12__chr14	0.0682291	0.0939045	1.37631	0.0659457
Cp__chr3	0.117547	0.161731	1.37588	0.11089
Cox10__chr11	0.0956319	0.131559	1.37568	0.0911914
Ank3__chr10	0.0805983	0.110862	1.37549	0.0774267
Adk__chr14	0.0933313	0.128348	1.37518	0.0890983
Palmd__chr3	0.0855882	0.117641	1.3745	0.0820184
Atp1b2__chr11	0.0762543	0.104735	1.37349	0.0734108
Tbc1d16__chr11	0.0819372	0.112538	1.37346	0.078661
Optn__chr2	0.0792966	0.108839	1.37256	0.0762252
Slc17a7__chr7	0.0679206	0.0931898	1.37204	0.0656575
Gyg__chr3	0.112621	0.154468	1.37158	0.106499
Gata4__chr14	0.0949694	0.130209	1.37106	0.0905891
Tln2__chr9	0.0846577	0.116048	1.37079	0.0811639
1700021F05Rik__chr10	0.0889783	0.121909	1.37009	0.0851248
Isca2__chr12	0.099932	0.136906	1.36999	0.0950906
Creg1__chr1	0.192396	0.263223	1.36813	0.175005
Gna11__chr10	0.120681	0.164982	1.36709	0.113672
Large__chr8	0.0806328	0.110213	1.36685	0.0774586
Osbpl1a__chr18	0.081746	0.111688	1.36628	0.0784849
Ddo__chr10	0.0714178	0.0975515	1.36593	0.0689189
G6pc3__chr11	0.0862235	0.117755	1.36569	0.0826014
Neo1__chr9	0.0763725	0.104206	1.36444	0.0735203
Tiprl__chr1	0.0962465	0.131322	1.36443	0.0917497
Enpp4__chr17	0.0821479	0.111908	1.36227	0.0788552
Aplp2__chr9	0.212473	0.28936	1.36187	0.191403
Pgm2__chr4	0.117303	0.159745	1.36181	0.110672
Scn4b__chr9	0.0685675	0.0933492	1.36142	0.0662616
Csdc2__chr15	0.072478	0.0986643	1.3613	0.0699055
Rtn4ip1__chr10	0.0781337	0.106335	1.36093	0.0751504
Ndufaf6__chr4	0.0729898	0.0993198	1.36074	0.0703813
Npr2__chr4	0.0935743	0.127104	1.35832	0.0893196
Cyhr1__chr15	0.11012	0.149379	1.35651	0.104262
Tmco1__chr1	0.105171	0.142653	1.35639	0.0998187
Csde1__chr3	0.352661	0.478209	1.356	0.297172
Tmem65__chr15	0.129741	0.175862	1.35548	0.121665
Bckdhb__chr9	0.0780828	0.10579	1.35485	0.0751034
E2f6__chr12	0.0900255	0.121941	1.35451	0.0860823
Glrx5__chr12	0.123487	0.167194	1.35394	0.116155
D8Ertd82e__chr8	0.0818998	0.1108	1.35287	0.0786266
Bves__chr10	0.0747091	0.101037	1.3524	0.0719781
Plin4__chr17	0.0729944	0.0986817	1.35191	0.0703856
Plekha6__chr1	0.0823399	0.111239	1.35097	0.079032
Man2a2__chr7	0.0916723	0.123442	1.34656	0.087586
Pank1__chr19	0.0776615	0.104543	1.34613	0.0747136
Tsc22d4__chr5	0.140006	0.188465	1.34612	0.130634
Abca2__chr2	0.0795349	0.10702	1.34557	0.0764453
Slc40a1__chr1	0.0788309	0.106056	1.34537	0.075795
Ak3__chr19	0.105766	0.142135	1.34386	0.100354
Plekhm2__chr4	0.100306	0.134731	1.34319	0.0954291
Ubr4__chr4	0.124964	0.167809	1.34285	0.117459
Map4__chr9	0.166969	0.224165	1.34256	0.15376
Fbxw7__chr3	0.0886593	0.118989	1.3421	0.084833
Gfm2__chr13	0.0733907	0.0984325	1.34121	0.0707539
Gnas__chr2	1.08133	1.45015	1.34108	0.294081
Fem1a__chr17	0.106037	0.142104	1.34013	0.100598
Slmap__chr14	0.103149	0.138232	1.34012	0.0979967
Scube2__chr7	0.0726671	0.0973632	1.33985	0.0700813
Timm23__chr14	0.160265	0.214623	1.33917	0.148068
Hibch__chr1	0.0820356	0.109732	1.33761	0.0787517
Egln3__chr12	0.109846	0.146873	1.33708	0.104017
Slc36a2__chr11	0.0729438	0.0975259	1.337	0.0703386
Pde4d__chr13	0.0766069	0.102404	1.33674	0.0737375
Rap1gap2__chr11	0.0837174	0.111903	1.33668	0.0802996
Adcy5__chr16	0.072322	0.0966573	1.33649	0.0697604
Myocd__chr11	0.0702527	0.0938746	1.33624	0.0678337
H2-Ke6__chr17	0.0809032	0.107887	1.33353	0.077708
Acyp2__chr11	0.0763908	0.10186	1.3334	0.0735372
Cntn2__chr1	0.0668153	0.0890629	1.33297	0.0646242
Plin3__chr17	0.128332	0.170832	1.33117	0.120427
Armc2__chr10	0.0694894	0.0924936	1.33105	0.0671219
Ppp1r14c__chr10	0.0724232	0.096381	1.3308	0.0698545
Plcd1__chr9	0.074221	0.098759	1.33061	0.0715251
Ptdss2__chr7	0.0770525	0.102493	1.33017	0.07415
Wbscr16__chr5	0.0743131	0.0988175	1.32975	0.0716105
Irs1__chr1	0.0766885	0.101957	1.32949	0.073813
Pgrmc2__chr3	0.109138	0.145094	1.32946	0.103382
Hk2__chr6	0.136278	0.181142	1.32922	0.127387
Kif21a__chr15	0.0711649	0.0945837	1.32908	0.0686835
Antxr2__chr5	0.0800728	0.106392	1.32869	0.0769419
Fam135a__chr1	0.0706029	0.0937771	1.32823	0.06816
Usp28__chr9	0.0724286	0.0961857	1.32801	0.0698595
Cox7a2__chr9	0.186113	0.247144	1.32792	0.169806
2810407C02Rik__chr3	0.150117	0.199326	1.3278	0.139379
Slain2__chr5	0.11191	0.14858	1.32768	0.105864
Timm17a__chr1	0.118849	0.157738	1.32721	0.112046
Poldip2__chr11	0.0968941	0.128467	1.32585	0.0923376
Dsc2__chr18	0.0682313	0.0904401	1.32549	0.0659477
Tmem258__chr19	0.133406	0.176797	1.32526	0.124877
Tfpi__chr2	0.0889177	0.117792	1.32473	0.0850694
Coa5__chr1	0.128571	0.17027	1.32433	0.120636
Cox7c__chr13	0.100912	0.133577	1.32369	0.0959772
E130308A19Rik__chr4	0.0677774	0.0896697	1.323	0.0655237
Timm10__chr2	0.0907064	0.119996	1.32291	0.0867043
Rab3ip__chr10	0.0837364	0.110772	1.32286	0.080317
Tmem8b__chr4	0.072537	0.0959125	1.32226	0.0699603
Clpb__chr7	0.0859258	0.113599	1.32205	0.0823282
Ttll1__chr15	0.0758474	0.100273	1.32204	0.0730338
Srpk3__chrX	0.0728871	0.0963226	1.32153	0.0702858
Lyrm4__chr13	0.0784162	0.103617	1.32137	0.0754116
Mrps25__chr6	0.0856985	0.113227	1.32123	0.0821196
Wnk1__chr6	0.239189	0.315963	1.32098	0.212719
Dcakd__chr11	0.105343	0.139129	1.32073	0.0999729
Nipal3__chr4	0.075077	0.0990682	1.31956	0.0723194
Ndufaf1__chr2	0.0798469	0.105328	1.31912	0.0767334
Serpinb6b__chr13	0.0799568	0.105453	1.31888	0.0768348
Rhot1__chr11	0.093764	0.123663	1.31887	0.0894923
Siae__chr9	0.0743325	0.0980339	1.31886	0.0716285
Rn45s__chr17	61.0157	80.4689	1.31882	0.00735253
Ccnd2__chr6	0.163349	0.215425	1.3188	0.150691
Rnf13__chr3	0.113475	0.149622	1.31854	0.107262
Rabggtb__chr3	0.100138	0.132008	1.31826	0.095277
Dgcr2__chr16	0.0822033	0.108353	1.31811	0.0789062
Mrpl19__chr6	0.0846847	0.111604	1.31788	0.0811888
Cacfd1__chr2	0.0843274	0.111074	1.31717	0.0808604
Fech__chr18	0.104021	0.137012	1.31717	0.0987824
Filip1__chr9	0.0723083	0.095178	1.31628	0.0697477
Fam73b__chr2	0.0756173	0.0995289	1.31622	0.0728204
Gstm2__chr3	0.13092	0.172126	1.31474	0.1227
Fermt2__chr14	0.129369	0.169989	1.31399	0.121338
Rorc__chr3	0.0721241	0.0947292	1.31342	0.0695763
Tmem160__chr7	0.110497	0.145093	1.31309	0.1046
4921524J17Rik__chr8	0.075737	0.0994417	1.31299	0.0729314
Cpxm2__chr7	0.0736183	0.0966244	1.3125	0.0709654
Oxld1__chr11	0.071087	0.0932972	1.31244	0.0686109
Lrrc39__chr3	0.0764169	0.100286	1.31235	0.0735615
Araf__chrX	0.0971862	0.127503	1.31194	0.0926026
Nadkd1__chr15	0.0806403	0.105794	1.31193	0.0774655
D17Wsu92e__chr17	0.115503	0.151497	1.31162	0.109071
Epas1__chr17	0.222013	0.291102	1.3112	0.19908
Opa1__chr16	0.0935174	0.122611	1.31111	0.0892678
Mtch2__chr2	0.115699	0.151688	1.31106	0.109245
Prdx2__chr8	0.171317	0.224594	1.31099	0.157432
Fkrp__chr7	0.0833866	0.109316	1.31096	0.0799953
Eif4e__chr3	0.138917	0.18211	1.31092	0.129687
Tmem143__chr7	0.0765366	0.100327	1.31084	0.0736723
Epn2__chr11	0.0865936	0.11344	1.31002	0.0829408
Pik3ip1__chr11	0.0799694	0.104757	1.30996	0.0768465
Paqr9__chr9	0.0720771	0.0944003	1.30971	0.0695326
Mgll__chr6	0.207375	0.27157	1.30957	0.18727
Tmem41b__chr7	0.0925283	0.121132	1.30913	0.0883667
Tex261__chr6	0.104731	0.137021	1.30831	0.0994228
Tmem101__chr11	0.0770119	0.10074	1.30811	0.0741124
Metap1__chr3	0.0993802	0.129981	1.30791	0.0945911
Ginm1__chr10	0.0878734	0.114895	1.30751	0.0841136
Srf__chr17	0.110167	0.144027	1.30735	0.104304
Sys1__chr2	0.11561	0.151122	1.30717	0.109166
Pebp1__chr5	0.227782	0.297743	1.30714	0.203687
Lmtk2__chr5	0.0734122	0.0959109	1.30647	0.0707739
Pcp4l1__chr1	0.115605	0.150981	1.30601	0.109161
Gsta4__chr9	0.0805862	0.105217	1.30565	0.0774156
Canx__chr11	0.290128	0.378691	1.30525	0.251818
Grlf1__chr7	0.08347	0.108934	1.30507	0.080072
Emc4__chr2	0.0968025	0.126329	1.30501	0.0922544
Slk__chr19	0.13196	0.172115	1.3043	0.123611
Cxadr__chr16	0.0732148	0.0954925	1.30428	0.0705904
Apip__chr2	0.0825824	0.107708	1.30425	0.0792553
Gpcpd1__chr2	0.113543	0.148062	1.30402	0.107323
Isca1__chr13	0.133798	0.174465	1.30395	0.12522
Rnf150__chr8	0.0920802	0.120053	1.30379	0.0879581
Sorcs2__chr5	0.0702721	0.0916196	1.30378	0.0678517
Nfs1__chr2	0.0809042	0.105474	1.30369	0.077709
Psmd6__chr14	0.103524	0.134961	1.30368	0.0983346
Mrps36__chr13	0.108783	0.141778	1.30331	0.103064
Ccpg1__chr9	0.0897944	0.117004	1.30302	0.0858712
Spcs1__chr14	0.175482	0.228483	1.30203	0.160934
Cox7a2l__chr17	0.20134	0.262111	1.30184	0.182351
Rnf14__chr18	0.098548	0.128288	1.30178	0.0938374
Scaper__chr9	0.0767794	0.0998647	1.30067	0.0738972
Sun1__chr5	0.0854071	0.110994	1.29959	0.0818521
Metrn__chr17	0.0767437	0.0997242	1.29944	0.0738641
0610012G03Rik__chr16	0.111385	0.144658	1.29872	0.105394
Dennd1b__chr1	0.0751519	0.0975841	1.29849	0.0723889
Appl2__chr10	0.0867395	0.11263	1.29849	0.0830745
Fam69b__chr2	0.0751057	0.0975118	1.29833	0.072346
Tmem42__chr9	0.0728688	0.0946005	1.29823	0.0702689
Acta1__chr8	0.122794	0.159398	1.29809	0.115542
Zdhhc9__chrX	0.0847752	0.110013	1.29771	0.0812718
Mrpl37__chr4	0.0927545	0.120301	1.29698	0.0885728
Ap1g1__chr8	0.10407	0.134806	1.29534	0.0988267
Otud7b__chr3	0.090759	0.11752	1.29486	0.0867524
Ubr5__chr15	0.113942	0.147453	1.29411	0.107679
Fktn__chr4	0.0746643	0.0966009	1.2938	0.0719365
Retsat__chr6	0.0761051	0.0984497	1.2936	0.0732725
Smcr7__chr11	0.0739529	0.0956599	1.29352	0.0712761
Kcnb1__chr2	0.0847824	0.109668	1.29352	0.0812785
Alg3__chr16	0.0827955	0.107065	1.29312	0.0794514
Arpc5l__chr2	0.103457	0.133727	1.29259	0.0982741
Eif2b5__chr16	0.0920539	0.118953	1.29221	0.0879341
Pomt1__chr2	0.0754862	0.097512	1.29179	0.0726989
Eci2__chr13	0.110023	0.142068	1.29126	0.104175
Ddt__chr10	0.0813456	0.10503	1.29116	0.0781158
Hcfc2__chr10	0.0751334	0.097007	1.29113	0.0723717
AU040320__chr4	0.0892341	0.115199	1.29097	0.0853588
Daam1__chr12	0.0832218	0.107415	1.29071	0.0798437
Ptgfrn__chr3	0.134961	0.174135	1.29026	0.126237
Zbtb20__chr16	0.116686	0.150506	1.28984	0.110124
Sox4__chr13	0.111412	0.14366	1.28944	0.105419
Afg3l2__chr18	0.104166	0.134305	1.28933	0.0989135
Fitm2__chr2	0.078915	0.101729	1.28909	0.0758727
Hbp1__chr12	0.114278	0.1473	1.28897	0.107978
Adrb1__chr19	0.0718881	0.0926476	1.28877	0.0693567
Tmx2__chr2	0.100323	0.12909	1.28674	0.0954442
Fam3a__chrX	0.0734457	0.0944931	1.28657	0.070805
Fabp4__chr3	0.66665	0.857518	1.28631	0.486585
Dyrk1a__chr16	0.0974146	0.125305	1.2863	0.0928099
Clpp__chr17	0.0895357	0.115154	1.28612	0.0856347
Nt5c3__chr6	0.0887331	0.114041	1.28521	0.0849005
Rbpms2__chr9	0.0794367	0.102061	1.28481	0.0763546
Gpd1__chr15	0.070658	0.0907766	1.28473	0.0682114
Cd200__chr16	0.0974321	0.125171	1.28469	0.0928257
Minos1__chr4	0.20075	0.257883	1.2846	0.181868
Rbbp7__chrX	0.132335	0.169946	1.28421	0.12394
Klhl40__chr9	0.0681945	0.087544	1.28374	0.0659133
Dnajc21__chr15	0.0899704	0.115498	1.28374	0.086032
Syngr1__chr15	0.0947379	0.121551	1.28302	0.0903785
Slc47a1__chr11	0.0741429	0.0950423	1.28188	0.0714525
Rabgap1__chr2	0.0873491	0.111968	1.28184	0.0836333
Ncln__chr10	0.114484	0.14669	1.28132	0.108162
Ttc12__chr9	0.069534	0.0890728	1.281	0.0671635
Rbm10__chrX	0.0757632	0.0970492	1.28095	0.0729557
Tenc1__chr15	0.0952248	0.121938	1.28053	0.0908213
Rapgef1__chr2	0.1455	0.186309	1.28048	0.135397
Slc6a8__chrX	0.104366	0.133638	1.28048	0.0990932
Fahd1__chr17	0.0762326	0.0976127	1.28046	0.0733907
Echdc2__chr4	0.0744943	0.0953737	1.28028	0.0717787
Dctn1__chr6	0.142134	0.181873	1.27959	0.132482
Gpt__chr15	0.0708148	0.0905671	1.27893	0.0683574
Phkb__chr8	0.0734014	0.0938569	1.27868	0.0707638
Myh11__chr16	0.0881098	0.112661	1.27865	0.08433
Sil1__chr18	0.0804929	0.102915	1.27856	0.0773295
Ifrd2__chr9	0.0783396	0.10014	1.27829	0.0753408
Sar1a__chr10	0.16618	0.21239	1.27807	0.153092
Nfu1__chr6	0.0910854	0.116373	1.27762	0.0870504
Ptdss1__chr13	0.107025	0.136726	1.27752	0.101485
Polr3e__chr7	0.073402	0.0937613	1.27737	0.0707644
Osbpl6__chr2	0.0707473	0.0903676	1.27733	0.0682945
Pitpnm2__chr5	0.0968096	0.123635	1.27709	0.0922609
Slc25a42__chr8	0.073385	0.0937033	1.27687	0.0707486
Oplah__chr15	0.0710589	0.0907013	1.27642	0.0685848
Pex19__chr1	0.0887051	0.113191	1.27603	0.084875
Fdx1__chr9	0.085523	0.109103	1.27571	0.0819585
Atp6v1d__chr12	0.133241	0.169936	1.27541	0.124733
Mapkapk5__chr5	0.0904671	0.115371	1.27528	0.0864858
Insig2__chr1	0.088272	0.112482	1.27426	0.0844785
Chd2__chr7	0.0931345	0.118637	1.27382	0.088919
Lysmd4__chr7	0.0686579	0.0874346	1.27348	0.066346
Lrpap1__chr5	0.117273	0.149323	1.2733	0.110646
Cbr1__chr16	0.0815539	0.103808	1.27288	0.0783079
Ralgapa1__chr12	0.110973	0.141212	1.27249	0.105026
Esrrg__chr1	0.0678879	0.0863537	1.272	0.0656269
Atp9a__chr2	0.0811368	0.103168	1.27153	0.0779234
Abcg2__chr6	0.0889914	0.113146	1.27143	0.0851368
Gypc__chr18	0.0783513	0.0996119	1.27135	0.0753516
Usmg5__chr19	0.223709	0.284392	1.27126	0.200437
Ankrd23__chr1	0.0899812	0.114359	1.27093	0.0860418
Taz__chrX	0.0933878	0.118676	1.27078	0.0891498
Pcca__chr14	0.082932	0.105386	1.27075	0.079577
4833439L19Rik__chr13	0.10005	0.127118	1.27054	0.0951975
Sod1__chr16	0.271515	0.344948	1.27045	0.237762
Eif4e3__chr6	0.0855353	0.10861	1.26977	0.0819698
Meis2__chr2	0.0790586	0.100347	1.26928	0.0760053
Phf3__chr1	0.0904694	0.11481	1.26905	0.0864879
1110001A16Rik__chr17	0.0774914	0.0983281	1.26889	0.0745562
Twsg1__chr17	0.0991534	0.125699	1.26773	0.0943858
Agtr1a__chr13	0.0710635	0.0900679	1.26743	0.0685891
Cabp1__chr5	0.069066	0.0874801	1.26662	0.0667269
Brd7__chr8	0.0979658	0.124071	1.26647	0.0933097
1110001J03Rik__chr6	0.0910162	0.115265	1.26642	0.0869872
Pdgfa__chr5	0.100469	0.12723	1.26635	0.0955766
Tmem50b__chr16	0.0944322	0.119581	1.26632	0.0901004
Klhl41__chr2	0.0713282	0.0903109	1.26613	0.0688356
Ago4__chr4	0.0717882	0.0908831	1.26599	0.0692637
Ldhd__chr8	0.0680577	0.0861528	1.26588	0.0657855
Sac3d1__chr19	0.0773734	0.0979021	1.26532	0.0744471
Prkcsh__chr9	0.123729	0.156447	1.26443	0.116369
Lace1__chr10	0.0748905	0.0946929	1.26442	0.0721464
Slco5a1__chr1	0.0713356	0.090178	1.26414	0.0688425
Nkx2-5__chr17	0.0797784	0.100806	1.26357	0.0766701
Tmem223__chr19	0.0895302	0.113109	1.26336	0.0856296
Wnt5a__chr14	0.0710776	0.0897842	1.26318	0.0686022
Klhdc8a__chr1	0.069479	0.0877548	1.26304	0.0671122
Acot2__chr12	0.0858388	0.108404	1.26288	0.0822484
Vopp1__chr6	0.083559	0.105507	1.26267	0.0801539
Slc25a23__chr17	0.0775938	0.097929	1.26207	0.074651
Foxo4__chrX	0.0779075	0.0983141	1.26193	0.0749412
Rnft1__chr11	0.0793319	0.100079	1.26152	0.0762578
Calcoco1__chr15	0.0916398	0.115601	1.26147	0.0875564
Slc4a2__chr5	0.0930036	0.117313	1.26138	0.0887997
Tpi1__chr6	0.383596	0.483828	1.2613	0.318582
Herc3__chr6	0.0715095	0.090191	1.26124	0.0690044
Grhpr__chr4	0.0785005	0.098999	1.26113	0.0754895
Limd1__chr9	0.125629	0.158405	1.2609	0.118046
Rrp12__chr19	0.0721058	0.0909151	1.26086	0.0695592
Scmh1__chr4	0.077827	0.0981108	1.26063	0.0748668
Gm7120__chr13	0.0730562	0.0920328	1.25975	0.0704431
Gtpbp5__chr2	0.0739496	0.0931534	1.25969	0.071273
Bdnf__chr2	0.0727479	0.0916178	1.25939	0.0701564
Gtf2i__chr5	0.118374	0.149078	1.25938	0.111625
Aldh6a1__chr12	0.0814379	0.102522	1.2589	0.078201
Phpt1__chr2	0.0831192	0.104632	1.25882	0.0797493
Mib2__chr4	0.0729106	0.0917646	1.25859	0.0703077
Fam120c__chrX	0.0723362	0.0910298	1.25843	0.0697736
Tgoln1__chr6	0.153133	0.192693	1.25834	0.141971
Prnp__chr2	0.106079	0.133462	1.25814	0.100636
Kbtbd3__chr9	0.0707107	0.0889389	1.25779	0.0682605
Abcd3__chr3	0.0891329	0.112065	1.25728	0.0852663
Lrpprc__chr17	0.128124	0.161058	1.25705	0.120243
Emc2__chr15	0.100504	0.126315	1.25682	0.0956079
Pvrl2__chr7	0.0813834	0.102273	1.25668	0.0781507
Tecpr1__chr5	0.0846727	0.106405	1.25666	0.0811776
Cdc123__chr2	0.109925	0.138135	1.25664	0.104087
Ets1__chr9	0.117546	0.147713	1.25664	0.110889
Lias__chr5	0.0908827	0.114191	1.25647	0.0868654
Lsmem1__chr12	0.0729371	0.0916122	1.25605	0.0703323
Igsf1__chrX	0.0694851	0.0872729	1.25599	0.067118
Camk2a__chr18	0.0702606	0.088243	1.25594	0.067841
Lrba__chr3	0.0734586	0.0922227	1.25544	0.0708169
Dusp27__chr1	0.0719978	0.0903385	1.25474	0.0694588
L2hgdh__chr12	0.0721696	0.090549	1.25467	0.0696186
Prmt7__chr8	0.0772366	0.0969008	1.2546	0.0743205
Extl1__chr4	0.0707981	0.0888142	1.25447	0.0683419
Jph1__chr1	0.0672929	0.0843991	1.2542	0.0650709
Angpt1__chr15	0.0733252	0.0919627	1.25418	0.070693
Mpi__chr9	0.0820473	0.10287	1.25378	0.0787625
Ccbl1__chr2	0.0700052	0.0877665	1.25371	0.067603
Ubac1__chr2	0.0833055	0.104411	1.25335	0.0799207
Nkiras1__chr14	0.0764855	0.0958367	1.25301	0.073625
Abcb7__chrX	0.0880694	0.110321	1.25266	0.084293
Mapk9__chr11	0.0919163	0.115103	1.25226	0.0878086
Zdhhc14__chr17	0.0743882	0.0931454	1.25215	0.0716803
Hbs1l__chr10	0.0975452	0.122103	1.25176	0.0929283
Rprd1a__chr18	0.0753374	0.094299	1.25169	0.0725609
Dip2c__chr13	0.0758879	0.0949855	1.25166	0.0730713
Mrpl27__chr11	0.0952567	0.119223	1.2516	0.0908503
Ezh1__chr11	0.0815816	0.102106	1.25159	0.0783334
Dusp8__chr7	0.0768578	0.0961772	1.25137	0.0739698
Mrps9__chr1	0.0880744	0.110192	1.25112	0.0842976
Synj2__chr17	0.0749193	0.0937331	1.25112	0.0721731
0610009O20Rik__chr18	0.0838462	0.10487	1.25074	0.0804181
Rassf3__chr10	0.12907	0.16138	1.25033	0.121075
Zfp598__chr17	0.0849854	0.106252	1.25024	0.0814649
Grsf1__chr5	0.103269	0.129105	1.25018	0.0981051
Cldn12__chr5	0.0723053	0.0903918	1.25014	0.0697449
Txnrd3__chr6	0.0695679	0.0869623	1.25003	0.0671952
Tmem86a__chr7	0.12244	0.153043	1.24994	0.115229
Hif1an__chr19	0.0810002	0.101238	1.24984	0.0777974
Rhd__chr4	0.0680343	0.0850251	1.24974	0.0657636
Tbc1d24__chr17	0.0810878	0.101295	1.2492	0.0778782
Prkd1__chr12	0.0690051	0.0861921	1.24907	0.0666701
Synpo2__chr3	0.0710788	0.0887794	1.24903	0.0686033
Lclat1__chr17	0.0916358	0.114401	1.24843	0.0875527
Eps8l2__chr7	0.0672841	0.0839936	1.24834	0.0650626
Agrn__chr4	0.0874925	0.10915	1.24754	0.0837647
Oxa1l__chr14	0.0950936	0.118565	1.24682	0.0907021
Cacna1g__chr11	0.0676595	0.0843594	1.24682	0.0654135
Marc2__chr1	0.105894	0.132028	1.24679	0.100469
Gm20594__chr6	0.0720451	0.0898229	1.24676	0.0695028
Ube2h__chr6	0.101014	0.125932	1.24667	0.0960694
Smim20__chr5	0.115869	0.144384	1.24609	0.109397
Ddx1__chr12	0.134647	0.167743	1.2458	0.125963
Pde4a__chr9	0.0922387	0.114901	1.24569	0.0881026
Akt2__chr7	0.11683	0.145532	1.24567	0.110252
Chrm2__chr6	0.067704	0.08433	1.24557	0.065455
Sema3b__chr9	0.072301	0.0900333	1.24526	0.0697408
Rgs12__chr5	0.081072	0.100929	1.24493	0.0778636
Btbd1__chr7	0.108143	0.134605	1.24469	0.10249
Lgr6__chr1	0.0667031	0.0830127	1.24451	0.0645193
Clic4__chr4	0.235565	0.293147	1.24444	0.20986
2410015M20Rik__chr17	0.108112	0.134479	1.24389	0.102461
Car14__chr3	0.0739748	0.0920147	1.24386	0.0712965
Arfgef2__chr2	0.0953028	0.118505	1.24346	0.0908922
Mgrn1__chr16	0.117576	0.146157	1.24309	0.110915
Pyurf__chr6	0.0844146	0.104934	1.24308	0.0809405
Tango6__chr8	0.0717319	0.0891538	1.24288	0.0692114
Arhgap20__chr9	0.0692066	0.0859997	1.24265	0.0668581
Atxn1__chr13	0.0882125	0.109597	1.24242	0.0844241
Wipi1__chr11	0.0936785	0.116386	1.2424	0.0894145
Satb1__chr17	0.072526	0.0900751	1.24197	0.0699501
Gle1__chr2	0.0836296	0.103844	1.24171	0.0802188
Brwd1__chr16	0.0999622	0.124091	1.24138	0.0951179
Acad12__chr5	0.0670938	0.0832802	1.24125	0.0648847
Opa3__chr7	0.0791809	0.0982693	1.24107	0.0761183
Rbfox1__chr16	0.0837123	0.103889	1.24103	0.0802949
Tnrc6b__chr15	0.107493	0.133402	1.24103	0.101906
Ctbp1__chr5	0.177203	0.219888	1.24088	0.162376
Nr1d1__chr11	0.0966804	0.119935	1.24053	0.0921437
Arhgef9__chrX	0.0684576	0.0849154	1.24041	0.066159
Igf1r__chr7	0.117417	0.145573	1.23979	0.110774
Mavs__chr2	0.0773354	0.0958617	1.23956	0.0744119
Dhrs11__chr11	0.0734031	0.0909763	1.23941	0.0707654
Paip2b__chr6	0.0772873	0.0957767	1.23923	0.0743674
Rragd__chr4	0.0747285	0.0925792	1.23887	0.0719961
Rhoq__chr17	0.110897	0.137346	1.23851	0.104958
Wbp1__chr6	0.0819339	0.101463	1.23836	0.078658
Ulk2__chr11	0.0943301	0.11678	1.238	0.0900076
Nprl3__chr11	0.0739458	0.0915145	1.23759	0.0712695
Jmy__chr13	0.0812526	0.100545	1.23744	0.0780301
Prkg1__chr19	0.0690254	0.0853721	1.23682	0.066689
Tmx4__chr2	0.0941087	0.116375	1.23661	0.0898061
Slc35g2__chr9	0.0680343	0.0841283	1.23656	0.0657636
Slc44a2__chr9	0.114286	0.141314	1.23649	0.107986
Gm12070__chr11	0.0753421	0.093146	1.23631	0.0725653
Fnta__chr8	0.0995287	0.123046	1.23629	0.0947256
Pxmp4__chr2	0.071357	0.088208	1.23615	0.0688624
Zfp352__chr4	0.0664645	0.0821532	1.23605	0.0642961
Dnajc18__chr18	0.0768476	0.0949774	1.23592	0.0739604
Hdac7__chr15	0.128606	0.158933	1.23581	0.120668
Mmab__chr5	0.0762361	0.0941984	1.23562	0.0733939
Fig4__chr10	0.0902362	0.111475	1.23537	0.0862748
Fgf13__chrX	0.0707333	0.0873751	1.23527	0.0682815
Dnajb5__chr4	0.0718046	0.0886937	1.23521	0.069279
Cd320__chr17	0.0755142	0.0932674	1.2351	0.0727249
As3mt__chr19	0.0786192	0.097101	1.23508	0.0755993
Flot1__chr17	0.12366	0.152691	1.23477	0.116308
Habp4__chr13	0.0845024	0.104292	1.23419	0.0810212
Fgfrl1__chr5	0.0709933	0.0876184	1.23418	0.0685237
Jagn1__chr6	0.0931204	0.114925	1.23416	0.0889062
Fbp2__chr13	0.0722159	0.0891034	1.23385	0.0696617
Rpp30__chr19	0.0777212	0.0958838	1.23369	0.0747689
Fkbp9__chr6	0.127769	0.157623	1.23366	0.119931
Rangrf__chr11	0.0822879	0.101484	1.23328	0.0789841
Alkbh7__chr17	0.0816711	0.100673	1.23266	0.0784159
Mrpl45__chr11	0.102419	0.126243	1.23261	0.097338
Diablo__chr5	0.0845066	0.104158	1.23254	0.0810251
Prrx1__chr1	0.0990798	0.122067	1.23201	0.0943191
Fmo1__chr1	0.0889549	0.109586	1.23193	0.0851035
Mreg__chr1	0.0714826	0.0880412	1.23165	0.0689793
Mal__chr2	0.069447	0.0855157	1.23138	0.0670824
Ccdc91__chr6	0.0724661	0.0892185	1.23118	0.0698944
Kcne1__chr16	0.0673839	0.0829513	1.23103	0.0651559
Pacs2__chr12	0.0900588	0.110774	1.23002	0.0861128
Aimp1__chr3	0.100809	0.123947	1.22953	0.0958833
Cpm__chr10	0.0684088	0.0841022	1.22941	0.0661134
Itgb6__chr2	0.0697333	0.0857302	1.2294	0.0673494
Clcn3__chr8	0.0942023	0.115779	1.22904	0.0898913
Lrrfip2__chr9	0.101666	0.124891	1.22845	0.0966579
Mesdc2__chr7	0.109341	0.134284	1.22812	0.103564
Aldh5a1__chr13	0.0714153	0.087654	1.22738	0.0689167
Mfap1a__chr2	0.0976272	0.119821	1.22733	0.0930027
Mrpl14__chr17	0.10543	0.129395	1.22731	0.100052
Smim7__chr8	0.109078	0.133854	1.22714	0.103328
Mrps27__chr13	0.0847812	0.10402	1.22692	0.0812774
Ift81__chr5	0.0732904	0.0898847	1.22642	0.0706607
Trmt2b__chrX	0.0757903	0.0929333	1.22619	0.0729808
1700020I14Rik__chr2	0.0836057	0.102508	1.22609	0.0801969
Cnih4__chr1	0.110432	0.135397	1.22606	0.104542
Mrpl55__chr11	0.0849061	0.104092	1.22597	0.0813921
Macf1__chr4	0.185969	0.227916	1.22556	0.169686
Pttg1ip__chr10	0.150402	0.184304	1.22541	0.139624
Hspb2__chr9	0.0800924	0.0981287	1.22519	0.0769599
Smim8__chr4	0.0759885	0.0930935	1.2251	0.0731645
Mrpl10__chr11	0.0934246	0.114426	1.22479	0.0891833
Ulk1__chr5	0.0965494	0.118221	1.22446	0.0920247
Cdadc1__chr14	0.0839863	0.102829	1.22436	0.0805469
Senp6__chr9	0.0987418	0.120804	1.22344	0.094013
Klc2__chr19	0.072748	0.0889953	1.22334	0.0701565
B3gnt1__chr19	0.0857927	0.104941	1.22319	0.0822061
Mapkapk2__chr1	0.167214	0.204424	1.22254	0.153967
2310015A10Rik__chr12	0.0704573	0.0861259	1.22238	0.0680243
Mcf2l__chr8	0.0987142	0.120647	1.22218	0.093988
Cog4__chr8	0.0861594	0.105229	1.22133	0.0825426
4932438A13Rik__chr3	0.0906616	0.110722	1.22127	0.0866635
Tmem117__chr15	0.0669001	0.0816928	1.22112	0.0647035
Klhl21__chr4	0.0829976	0.101337	1.22096	0.0796374
Wdr33__chr18	0.0890105	0.108674	1.22092	0.0851543
Rgma__chr7	0.0740046	0.0903502	1.22087	0.0713242
P2ry1__chr3	0.0734694	0.0896753	1.22058	0.0708271
Mrps17__chr5	0.0944371	0.115239	1.22028	0.0901049
Exoc3__chr13	0.100467	0.122597	1.22027	0.0955749
Ei24__chr9	0.0999593	0.121941	1.21991	0.0951153
Mast2__chr4	0.093674	0.114265	1.21982	0.0894103
Pfn2__chr3	0.0828713	0.101075	1.21966	0.0795212
Fam220a__chr5	0.0875358	0.106747	1.21947	0.0838044
Ciapin1__chr8	0.0966936	0.117905	1.21936	0.0921556
Mul1__chr4	0.0762899	0.0930229	1.21933	0.0734438
Pbx1__chr1	0.124374	0.15165	1.21931	0.116938
Dpm1__chr2	0.0912013	0.111173	1.21898	0.0871562
Wdr83__chr8	0.0798971	0.09739	1.21894	0.0767797
Myh7__chr14	0.0754922	0.0919989	1.21865	0.0727045
Stat5b__chr11	0.0824626	0.100492	1.21864	0.0791449
R3hdm1__chr1	0.0885472	0.107902	1.21858	0.0847305
2310050B05Rik__chr10	0.0680046	0.0828375	1.21812	0.0657359
Zfp811__chr17	0.0807913	0.0984115	1.2181	0.0776048
Abcf3__chr16	0.07678	0.093514	1.21795	0.0738977
Coa6__chr8	0.0781117	0.0951252	1.21781	0.0751301
Ubqln4__chr3	0.0835941	0.101794	1.21771	0.0801862
Larp1b__chr3	0.0880343	0.107195	1.21765	0.0842609
Rrn3__chr16	0.0899288	0.109483	1.21744	0.085994
Adcy1__chr11	0.066982	0.0815393	1.21733	0.0647801
Fars2__chr13	0.0734258	0.0893787	1.21726	0.0707866
Gnptg__chr17	0.0780669	0.0949893	1.21677	0.0750886
Casd1__chr6	0.0824736	0.100341	1.21665	0.0791551
Cacnb2__chr2	0.0707245	0.0860189	1.21625	0.0682733
Mrpl38__chr11	0.0813428	0.0988984	1.21582	0.0781133
Prpf19__chr19	0.110991	0.134877	1.21521	0.105042
Aars__chr8	0.116845	0.14198	1.21511	0.110266
Def8__chr8	0.08824	0.107221	1.21511	0.0844492
Deb1__chr9	0.0862947	0.104851	1.21504	0.0826667
Sesn1__chr10	0.0898133	0.109114	1.2149	0.0858884
Inca1__chr11	0.0665116	0.0807899	1.21467	0.0643402
Hdlbp__chr1	0.272073	0.330427	1.21448	0.238187
Srp68__chr11	0.0962533	0.116883	1.21433	0.0917558
Cisd3__chr11	0.0867078	0.105269	1.21406	0.0830455
Dtnbp1__chr13	0.152744	0.185434	1.21402	0.141637
Myo5b__chr18	0.0699428	0.0849082	1.21397	0.0675448
Ccdc84__chr9	0.0689723	0.0837214	1.21384	0.0666394
Pcsk7__chr9	0.0820354	0.099578	1.21384	0.0787516
Kdelr1__chr7	0.148185	0.179852	1.2137	0.137715
Aimp2__chr5	0.0916654	0.111246	1.21361	0.0875797
Tsnax__chr8	0.113243	0.137401	1.21333	0.107055
Egflam__chr15	0.069466	0.0842291	1.21252	0.0671001
Dffa__chr4	0.0773493	0.0937858	1.2125	0.0744247
Epha7__chr4	0.070967	0.0860443	1.21245	0.0684992
Tcf7l1__chr6	0.0913235	0.110712	1.21231	0.0872677
Cds2__chr2	0.118179	0.143263	1.21225	0.111452
6530402F18Rik__chr2	0.0691569	0.0838297	1.21217	0.0668117
Mcee__chr7	0.0910878	0.110393	1.21194	0.0870526
Eml1__chr12	0.0858853	0.104086	1.21192	0.082291
Mat2b__chr11	0.0968084	0.117293	1.2116	0.0922598
Timm8b__chr9	0.0934612	0.11322	1.21141	0.0892166
Tmtc1__chr6	0.0848817	0.102826	1.2114	0.0813697
Lztfl1__chr9	0.0765651	0.0927352	1.21119	0.0736987
Ly6c1__chr15	0.108726	0.131671	1.21103	0.103013
Rras2__chr7	0.0998035	0.120809	1.21047	0.0949742
Vps13d__chr4	0.102591	0.124172	1.21036	0.097493
Dnajb4__chr3	0.0841575	0.101852	1.21025	0.0807042
Smarcd3__chr5	0.0768072	0.0929339	1.20996	0.0739229
Plk1s1__chr2	0.0737482	0.0892189	1.20978	0.071086
Tbrg4__chr11	0.0936951	0.113303	1.20927	0.0894296
Sema3c__chr5	0.0715189	0.0864742	1.20911	0.0690131
Capn7__chr14	0.0837542	0.101266	1.20909	0.0803334
Higd2a__chr13	0.130457	0.157734	1.20909	0.122293
Oat__chr7	0.142987	0.172872	1.209	0.133222
Nek9__chr12	0.109452	0.132315	1.20888	0.103664
Cyp4b1__chr4	0.0838548	0.10136	1.20876	0.080426
Ccdc47__chr11	0.126986	0.153435	1.20828	0.119242
Tmem35__chrX	0.0661655	0.0799361	1.20812	0.0640163
Cdk16__chrX	0.119325	0.144144	1.208	0.112469
Mef2c__chr13	0.11638	0.140569	1.20784	0.109852
Gmnn__chr13	0.0806497	0.09739	1.20757	0.0774742
Msra__chr14	0.0774886	0.093557	1.20736	0.0745537
Tmod4__chr3	0.0684527	0.0826456	1.20734	0.0661544
Otud4__chr8	0.0934528	0.112793	1.20696	0.089209
Cobll1__chr2	0.0748884	0.0903832	1.2069	0.0721445
Mrps28__chr3	0.0931663	0.112431	1.20678	0.088948
Tmem136__chr9	0.0684681	0.0826194	1.20668	0.0661688
Nsun4__chr4	0.0740548	0.0893507	1.20655	0.0713707
Ppp1r7__chr1	0.0931524	0.112373	1.20634	0.0889353
Slc25a22__chr7	0.0807131	0.097363	1.20629	0.0775326
3425401B19Rik__chr14	0.0769216	0.0927767	1.20612	0.0740289
Wnt11__chr7	0.0673573	0.0812298	1.20595	0.065131
Sun2__chr15	0.101728	0.122626	1.20543	0.0967142
AI987944__chr7	0.0739786	0.0891595	1.20521	0.0713
Aars2__chr17	0.0702626	0.0846799	1.20519	0.0678429
1810043H04Rik__chr11	0.0838161	0.101007	1.20511	0.0803904
Ptpn3__chr4	0.0696686	0.0839479	1.20496	0.0672891
Fam57b__chr7	0.0703157	0.0847189	1.20484	0.0678924
Tmem171__chr13	0.069126	0.0832814	1.20478	0.0667829
Ciao1__chr2	0.0800729	0.0964623	1.20468	0.076942
Anks1__chr17	0.0841259	0.101338	1.2046	0.0806752
Acot1__chr12	0.0766374	0.0923053	1.20444	0.0737657
Mrpl53__chr6	0.0929618	0.11196	1.20437	0.0887617
Zfp865__chr7	0.0686245	0.0826007	1.20366	0.0663148
Whrn__chr4	0.071256	0.0857565	1.2035	0.0687683
Lims2__chr18	0.117448	0.141279	1.20291	0.110802
Ext2__chr2	0.0872531	0.104945	1.20277	0.0835453
Il6st__chr13	0.119857	0.144161	1.20277	0.112941
Letm1__chr5	0.0963839	0.115902	1.2025	0.0918744
Casq1__chr1	0.0685191	0.0823644	1.20206	0.0662164
Vps26b__chr9	0.0890019	0.106981	1.20201	0.0851465
Supt7l__chr5	0.0762311	0.091621	1.20188	0.0733893
Cux2__chr5	0.0662891	0.0796697	1.20185	0.0641319
Larp4b__chr13	0.0981482	0.117946	1.20171	0.0934751
Ttc19__chr11	0.0743372	0.0893051	1.20135	0.071633
Intu__chr3	0.0733858	0.0881526	1.20122	0.0707494
Gatad1__chr5	0.11344	0.136264	1.2012	0.107231
Gsto1__chr19	0.106348	0.12774	1.20116	0.100877
Dhrs13__chr11	0.0709451	0.0852113	1.20109	0.0684788
Gyk__chrX	0.0775233	0.0930954	1.20087	0.0745858
Ylpm1__chr12	0.0935705	0.112361	1.20082	0.0893161
Fam131a__chr16	0.0713353	0.0856563	1.20076	0.0688421
Kcnj2__chr11	0.0873139	0.10482	1.20049	0.083601
Sephs2__chr7	0.0802436	0.0963114	1.20024	0.0770995
Mrps18a__chr17	0.0858935	0.103087	1.20017	0.0822986
Abtb2__chr2	0.0731092	0.0877393	1.20011	0.0704923
Kctd9__chr14	0.0844416	0.101327	1.19997	0.0809653
Dgka__chr10	0.08736	0.104799	1.19963	0.0836433
Slc9a3r2__chr17	0.142148	0.170522	1.19961	0.132494
Pcsk4__chr10	0.0667121	0.0800168	1.19944	0.0645277
Kank3__chr17	0.0966305	0.115899	1.1994	0.0920984
Dpyd__chr3	0.0665843	0.0798531	1.19928	0.0644082
Dnaja4__chr9	0.0805877	0.0966453	1.19926	0.077417
Tefm__chr11	0.0728745	0.0873816	1.19907	0.0702742
Galnt1__chr18	0.166686	0.199796	1.19864	0.153521
Ablim2__chr5	0.0677915	0.0812487	1.19851	0.0655368
Kansl3__chr1	0.087845	0.105271	1.19837	0.0840876
Dcun1d2__chr8	0.0757666	0.0907868	1.19824	0.0729588
Acrbp__chr6	0.0706319	0.0846304	1.19819	0.068187
1810026J23Rik__chr9	0.0824727	0.0988176	1.19819	0.0791542
Pex7__chr10	0.0765808	0.0917391	1.19794	0.0737132
Atg9a__chr1	0.0806207	0.0965642	1.19776	0.0774475
Pcgf5__chr19	0.0816346	0.0977501	1.19741	0.0783823
Adssl1__chr12	0.112112	0.134206	1.19707	0.106044
Clptm1__chr7	0.151732	0.181589	1.19678	0.140768
Tcp11l2__chr10	0.087937	0.105235	1.19671	0.0841718
Gpr157__chr4	0.0750861	0.0898542	1.19668	0.0723279
Nsmce4a__chr7	0.0962579	0.115165	1.19642	0.09176
Wdr60__chr12	0.069002	0.0825419	1.19622	0.0666672
Cby1__chr15	0.0754527	0.0902482	1.19609	0.0726678
Cdc37l1__chr19	0.0819406	0.0979936	1.19591	0.0786642
Nfyc__chr4	0.101123	0.120927	1.19584	0.096168
Sos1__chr17	0.0808811	0.0966799	1.19533	0.0776876
Ankrd11__chr8	0.121071	0.1447	1.19516	0.114017
Ubap2__chr4	0.110629	0.132183	1.19483	0.104718
Sdf2__chr11	0.10218	0.12207	1.19466	0.0971223
Gimap4__chr6	0.094106	0.112412	1.19453	0.0898037
Maf1__chr15	0.0922635	0.110181	1.1942	0.0881252
Gstm5__chr3	0.0792066	0.0945818	1.19411	0.0761421
Scamp1__chr13	0.0969557	0.115775	1.1941	0.0923934
Amigo1__chr3	0.071722	0.0856387	1.19404	0.0692021
Ddrgk1__chr2	0.100497	0.119995	1.19402	0.0956013
Cpq__chr15	0.089239	0.106549	1.19397	0.0853633
Rnf167__chr11	0.083928	0.100147	1.19325	0.0804932
Mrpl30__chr1	0.12486	0.148972	1.19311	0.117368
Utrn__chr10	0.112451	0.134145	1.19292	0.106348
Arl2__chr19	0.0898021	0.107124	1.19289	0.0858782
Fry__chr5	0.0775746	0.0925341	1.19284	0.0746333
Gpatch1__chr7	0.0733846	0.0875209	1.19263	0.0707482
Pigs__chr11	0.0868725	0.10359	1.19243	0.0831965
Car8__chr4	0.0948451	0.113085	1.19231	0.0904761
Nub1__chr5	0.086906	0.1036	1.19209	0.0832272
Zfp597__chr16	0.0717547	0.0855194	1.19183	0.0692325
Rhbdf1__chr11	0.0836944	0.0996989	1.19123	0.0802784
5730409E04Rik__chr4	0.0739593	0.088102	1.19122	0.0712821
Ybx2__chr11	0.0687781	0.081926	1.19116	0.0664583
Alpl__chr4	0.0807632	0.0961953	1.19108	0.0775789
Mrps31__chr8	0.0812035	0.0967159	1.19103	0.0779849
Fsd1l__chr4	0.0743845	0.0885884	1.19095	0.0716768
Dnm1l__chr16	0.0990545	0.117953	1.19079	0.0942962
Rad51d__chr11	0.0772708	0.0920018	1.19064	0.0743521
Akr7a5__chr4	0.0817163	0.0972701	1.19034	0.0784576
Nqo1__chr8	0.0695336	0.0827614	1.19024	0.0671631
1110018G07Rik__chr12	0.0847215	0.100814	1.18995	0.0812225
Rela__chr19	0.0960059	0.114237	1.18989	0.0915311
Lamp1__chr8	0.815895	0.970791	1.18985	0.442219
Qser1__chr2	0.0860831	0.102402	1.18957	0.0824726
Efna1__chr3	0.0799525	0.0950686	1.18906	0.0768308
Phactr2__chr10	0.108022	0.128425	1.18888	0.102381
Higd1a__chr9	0.135313	0.16086	1.1888	0.126545
Npr1__chr3	0.0828899	0.0985298	1.18868	0.0795383
Lman2l__chr1	0.0779513	0.0926358	1.18838	0.0749818
Yif1a__chr19	0.109506	0.1301	1.18806	0.103712
Rapsn__chr2	0.0691534	0.082137	1.18775	0.0668085
Prr24__chr7	0.0792858	0.0941549	1.18754	0.0762153
Fkbp3__chr12	0.0917125	0.108903	1.18744	0.0876227
Dars__chr1	0.101428	0.120407	1.18712	0.0964434
Slc25a16__chr10	0.0749377	0.0889497	1.18698	0.0721901
Garem__chr18	0.0688633	0.0817385	1.18697	0.0665377
Klhl12__chr1	0.0718908	0.0853112	1.18668	0.0693592
2310067B10Rik__chr11	0.0798178	0.0947123	1.18661	0.0767065
Tcaim__chr9	0.0752953	0.0893458	1.18661	0.0725219
Acss2__chr2	0.0702785	0.0833736	1.18633	0.0678577
Zfp386__chr12	0.0968147	0.114837	1.18616	0.0922655
Nav2__chr7	0.0768761	0.0911747	1.186	0.0739867
Nedd4l__chr18	0.0750486	0.0890054	1.18597	0.0722931
Mrps33__chr6	0.0992111	0.117657	1.18593	0.094438
Mgme1__chr2	0.0753774	0.0893797	1.18576	0.072598
Mrpl50__chr4	0.0848528	0.100607	1.18566	0.0813431
Rnf187__chr11	0.128803	0.152689	1.18544	0.120841
Pak4__chr7	0.0758248	0.0898803	1.18537	0.0730128
Ric8b__chr10	0.0832722	0.0986881	1.18513	0.0798901
Cdk19__chr10	0.0924022	0.109501	1.18505	0.0882517
Itga3__chr11	0.0718314	0.0851193	1.18499	0.0693039
Psmc3__chr2	0.15892	0.188303	1.18489	0.146922
Sh2b1__chr7	0.0840072	0.0995304	1.18478	0.080566
Suox__chr10	0.0682672	0.0808662	1.18455	0.0659812
Scd4__chr19	0.0716237	0.0848399	1.18452	0.0691107
Irx2__chr13	0.0675162	0.0799364	1.18396	0.0652795
Pum1__chr4	0.106415	0.12599	1.18394	0.100938
Mrpl44__chr1	0.0774382	0.0916765	1.18387	0.0745071
Cox20__chr1	0.103962	0.123077	1.18386	0.09873
Dcaf8__chr1	0.0953925	0.112929	1.18384	0.0909738
Ubn2__chr6	0.117821	0.139474	1.18378	0.111133
Tspan15__chr10	0.0764733	0.090508	1.18352	0.0736137
Paqr4__chr17	0.076309	0.0903102	1.18348	0.0734615
Asb10__chr5	0.0756895	0.0895517	1.18315	0.0728874
Ccdc85a__chr11	0.070361	0.0832421	1.18307	0.0679346
Dedd2__chr7	0.0710407	0.0840456	1.18306	0.0685678
9630033F20Rik__chr6	0.0813909	0.0962892	1.18305	0.0781576
Zc3hc1__chr6	0.0756116	0.0893785	1.18207	0.0728152
Pcdh12__chr18	0.0805044	0.0951322	1.1817	0.0773401
Gpbp1__chr13	0.1101	0.130076	1.18143	0.104245
Git1__chr11	0.122285	0.144464	1.18137	0.115092
Ranbp6__chr19	0.0711349	0.0840298	1.18127	0.0686556
Spop__chr11	0.17435	0.205953	1.18126	0.159983
Mapk10__chr5	0.0670306	0.0791791	1.18124	0.0648256
Mrpl34__chr8	0.109237	0.129019	1.18109	0.103471
Ppip5k2__chr1	0.0869392	0.102682	1.18108	0.0832576
Card10__chr15	0.0814623	0.0961989	1.1809	0.0782235
Nfia__chr4	0.149936	0.177031	1.18071	0.139224
Tmem170b__chr13	0.0769205	0.0907958	1.18038	0.0740279
2310057M21Rik__chr7	0.0714053	0.0842847	1.18037	0.0689073
Fn3k__chr11	0.0702583	0.0829147	1.18014	0.0678389
Inha__chr1	0.0694318	0.0819316	1.18003	0.0670682
Abcb10__chr8	0.0718086	0.0847286	1.17992	0.0692827
Stard10__chr7	0.0698218	0.0823685	1.1797	0.067432
Srrm2__chr17	0.212215	0.250343	1.17967	0.191194
Tmcc3__chr10	0.104597	0.123389	1.17966	0.0993015
Them6__chr15	0.0693388	0.0817848	1.17949	0.0669815
Cul2__chr18	0.0839329	0.0989811	1.17929	0.0804977
Herc2__chr7	0.0922168	0.108749	1.17928	0.0880826
Arhgap12__chr18	0.0816395	0.0962671	1.17917	0.0783867
Hspa4l__chr3	0.0751908	0.0886474	1.17897	0.0724249
Tmed4__chr11	0.0845017	0.0996185	1.17889	0.0810206
Eral1__chr11	0.0735215	0.0866542	1.17862	0.0708754
Maea__chr5	0.113962	0.134304	1.1785	0.107697
Frem2__chr3	0.0666922	0.0785853	1.17833	0.0645091
Hagh__chr17	0.0880411	0.103726	1.17816	0.0842671
Fdft1__chr14	0.0868336	0.102301	1.17813	0.0831608
Rit1__chr3	0.0964273	0.113598	1.17806	0.0919139
Entpd6__chr2	0.0772895	0.0910403	1.17791	0.0743695
Slc37a4__chr9	0.0711621	0.0838201	1.17788	0.0686809
Zkscan1__chr5	0.0780444	0.0918915	1.17743	0.0750679
Nom1__chr5	0.0858292	0.10104	1.17722	0.0822396
Ptov1__chr7	0.113323	0.133337	1.17661	0.107126
Setd6__chr8	0.0701045	0.0824836	1.17658	0.0676955
Tff2__chr17	0.0656373	0.0772061	1.17625	0.0635219
Fam73a__chr3	0.0691782	0.081362	1.17612	0.0668316
Sec31b__chr19	0.0663231	0.0780014	1.17608	0.0641638
Ppp1r13l__chr7	0.087888	0.103342	1.17583	0.0841269
Snrk__chr9	0.154209	0.181276	1.17552	0.142893
Nf2__chr11	0.0943312	0.110863	1.17526	0.0900085
Setd8__chr5	0.16124	0.189492	1.17522	0.148899
Ppp1r26__chr2	0.066123	0.0776775	1.17474	0.0639765
Rxrg__chr1	0.0760422	0.0893117	1.1745	0.0732143
Gbp7__chr3	0.0968472	0.113745	1.17448	0.092295
Bend5__chr4	0.067031	0.0787219	1.17441	0.064826
Pcdhga3__chr18	0.0663516	0.0779193	1.17434	0.0641905
Fam132a__chr4	0.0732442	0.0860016	1.17418	0.0706178
Rptor__chr11	0.0775312	0.0910292	1.1741	0.0745931
Rbpms__chr8	0.134191	0.157547	1.17405	0.125565
Lipt1__chr1	0.0675883	0.0793486	1.174	0.065347
Zadh2__chr18	0.098527	0.115664	1.17393	0.0938183
Pgm5__chr19	0.0819102	0.0961529	1.17388	0.0786362
Ppp2r5a__chr1	0.0751634	0.0882243	1.17377	0.0723995
Hsph1__chr5	0.0919886	0.107962	1.17365	0.0878745
Psmb7__chr2	0.184338	0.216337	1.17359	0.168331
Naa35__chr13	0.0921218	0.108102	1.17346	0.087996
Ablim3__chr18	0.0938493	0.110123	1.1734	0.08957
Ttc21b__chr2	0.069138	0.0811252	1.17338	0.0667941
Fxyd6__chr9	0.0965998	0.113328	1.17317	0.0920705
Pcyt1a__chr16	0.104731	0.122851	1.17301	0.0994223
Slc25a35__chr11	0.0681283	0.0799111	1.17295	0.0658514
Cacna1h__chr17	0.0670198	0.0786102	1.17294	0.0648155
Mmp17__chr5	0.0674184	0.0790711	1.17284	0.0651881
Dusp23__chr1	0.0762875	0.0894722	1.17283	0.0734416
A430105I19Rik__chr2	0.0737235	0.0864308	1.17237	0.071063
Arl3__chr19	0.0876035	0.1027	1.17233	0.0838664
Kcna1__chr6	0.0674671	0.0790711	1.17199	0.0652337
Myo10__chr15	0.11522	0.135024	1.17188	0.108818
Fhl1__chrX	0.116498	0.13652	1.17186	0.109957
Mrpl2__chr17	0.0901521	0.105632	1.17171	0.086198
Enthd2__chr11	0.0715882	0.0838632	1.17147	0.0690776
Ccs__chr19	0.0786572	0.0921239	1.17121	0.0756345
Vwa7__chr17	0.0706215	0.082702	1.17106	0.0681774
Prrg2__chr7	0.0762445	0.0892681	1.17081	0.0734017
Shank1__chr7	0.0657151	0.0769382	1.17078	0.0635947
Tomm40l__chr1	0.0851828	0.0997042	1.17047	0.0816462
Tmub1__chr5	0.0737633	0.0863271	1.17033	0.0711001
Rbm25__chr12	0.231227	0.270597	1.17026	0.206426
Trap1__chr16	0.0856911	0.100261	1.17003	0.0821128
Sh3kbp1__chrX	0.142616	0.166854	1.16995	0.1329
Auts2__chr5	0.0739357	0.086494	1.16985	0.0712602
Pde2a__chr7	0.0996765	0.116596	1.16974	0.0948593
Cbr4__chr8	0.0743661	0.0869879	1.16973	0.0716597
Txndc15__chr13	0.105386	0.123271	1.16971	0.100012
Wbscr25__chr5	0.0658188	0.076968	1.16939	0.0636918
Tmem127__chr2	0.101833	0.119081	1.16938	0.0968089
Trpc4ap__chr2	0.108607	0.126969	1.16907	0.102906
Adhfe1__chr1	0.0749533	0.0876254	1.16907	0.0722047
Itm2b__chr14	0.798423	0.933312	1.16894	0.450015
6720401G13Rik__chrX	0.0783138	0.0915443	1.16894	0.075317
Esrrb__chr12	0.0683748	0.079906	1.16865	0.0660817
Rgcc__chr14	0.104151	0.12171	1.1686	0.0988999
Rcsd1__chr1	0.0988134	0.115471	1.16858	0.0940779
Dgat1__chr15	0.0965592	0.112834	1.16855	0.0920336
Foxj2__chr6	0.0846705	0.0989371	1.1685	0.0811757
Tmem14c__chr13	0.164832	0.192602	1.16847	0.15195
Fam162a__chr16	0.139891	0.163402	1.16807	0.130534
Zfp768__chr7	0.0709063	0.0828099	1.16788	0.0684426
Gm14378__chr8	0.0661634	0.0772547	1.16763	0.0640143
Lrrc3b__chr14	0.0693157	0.0809124	1.1673	0.0669599
Ppp1r9a__chr6	0.0725926	0.0847192	1.16705	0.0700121
Tmem59__chr4	0.201642	0.235317	1.167	0.182597
Syde2__chr3	0.0711169	0.0829829	1.16685	0.0686388
Lcmt1__chr7	0.0799674	0.0933012	1.16674	0.0768446
Mettl22__chr16	0.070358	0.0820872	1.16671	0.0679318
Gm1078__chr7	0.065856	0.0768328	1.16668	0.0637266
Emc7__chr2	0.128958	0.15045	1.16665	0.120977
Rwdd4a__chr8	0.0855258	0.0997733	1.16659	0.0819611
Mus81__chr19	0.0725964	0.0846809	1.16646	0.0700156
Pank4__chr4	0.075448	0.0879981	1.16634	0.0726634
Qdpr__chr5	0.103677	0.120909	1.1662	0.0984731
Yae1d1__chr13	0.0784458	0.0914672	1.16599	0.075439
A930005H10Rik__chr3	0.0708602	0.082599	1.16566	0.0683997
Tmem100__chr11	0.0715373	0.0833876	1.16565	0.0690302
Selenbp1__chr3	0.0771612	0.0899135	1.16527	0.0742506
Trmt5__chr12	0.0701284	0.0817184	1.16527	0.0677178
Myo6__chr9	0.0853522	0.0994565	1.16525	0.0818017
Pip5k1b__chr19	0.0717311	0.0835838	1.16524	0.0692106
Tom1__chr8	0.0995084	0.115918	1.16491	0.0947072
Pkd2l2__chr18	0.0669555	0.0779823	1.16469	0.0647554
Eif4a2__chr16	0.172683	0.201094	1.16453	0.158581
Flt3l__chr7	0.0724281	0.0843415	1.16449	0.0698591
Camk2d__chr3	0.110537	0.128716	1.16446	0.104636
Slc29a2__chr19	0.0685621	0.0798096	1.16405	0.0662565
Mapre3__chr5	0.0778524	0.0906236	1.16404	0.0748903
Arid4b__chr13	0.0959405	0.111647	1.16371	0.0914717
Tmem177__chr1	0.0676216	0.0786898	1.16368	0.0653781
Cisd2__chr3	0.114604	0.133361	1.16367	0.108269
Gal3st3__chr19	0.0677916	0.0788854	1.16365	0.0655369
Acy3__chr19	0.0712329	0.0828701	1.16337	0.0687468
Prkab2__chr3	0.0782098	0.0909719	1.16318	0.0752208
Gbe1__chr16	0.0846422	0.098445	1.16307	0.0811497
Rab3a__chr8	0.0758615	0.0882267	1.163	0.0730468
Tmem17__chr11	0.0674697	0.0784604	1.1629	0.0652361
Cars2__chr8	0.0744962	0.0866211	1.16276	0.0717805
Emc6__chr11	0.121718	0.141518	1.16267	0.11459
Ppfibp2__chr7	0.0720268	0.0837242	1.1624	0.0694858
Slc39a3__chr10	0.0758748	0.0881937	1.16236	0.0730592
Clcn2__chr16	0.0669787	0.0778531	1.16236	0.064777
Dnajc25__chr4	0.0790708	0.0919027	1.16228	0.0760166
Dgcr6__chr16	0.0828473	0.0962816	1.16216	0.0794991
Ppp1r3d__chr2	0.0753766	0.0875816	1.16192	0.0725973
Fstl4__chr11	0.0668148	0.0776197	1.16171	0.0646238
Dusp28__chr1	0.0691791	0.080339	1.16132	0.0668325
A930024E05Rik__chr5	0.0662397	0.0769189	1.16122	0.0640858
Fpgt__chr3	0.0697269	0.0809677	1.16121	0.0673435
Heyl__chr4	0.0820064	0.0952261	1.1612	0.0787248
Alkbh5__chr11	0.107964	0.125357	1.16109	0.102329
Polr1a__chr6	0.0810426	0.0940887	1.16098	0.0778366
Mllt10__chr2	0.0853801	0.0991238	1.16097	0.0818274
1810014B01Rik__chr10	0.0694058	0.0805583	1.16069	0.067044
Tshz1__chr18	0.0952876	0.110594	1.16063	0.0908784
Mgat4b__chr11	0.0894093	0.103757	1.16047	0.0855191
Neurl2__chr2	0.0699617	0.0811762	1.1603	0.0675623
Dexi__chr16	0.0767979	0.0890982	1.16017	0.0739143
Capn11__chr17	0.0662312	0.0768252	1.15996	0.0640778
Acadsb__chr7	0.0965274	0.111962	1.1599	0.0920047
Bhlhe41__chr6	0.0784252	0.0909417	1.1596	0.0754199
Ptprg__chr14	0.0957222	0.110993	1.15953	0.0912734
Echdc3__chr2	0.0690285	0.0800333	1.15943	0.0666919
Gstt1__chr10	0.0708025	0.0820885	1.1594	0.0683459
Atg4b__chr1	0.0799617	0.0927042	1.15936	0.0768393
Pik3ca__chr3	0.118619	0.137519	1.15934	0.111842
Mrm1__chr11	0.0717452	0.0831738	1.15929	0.0692238
Zmiz2__chr11	0.098193	0.113833	1.15928	0.0935157
Narf__chr11	0.0786857	0.0912081	1.15915	0.0756608
Slc4a4__chr5	0.0737079	0.0854358	1.15911	0.0710486
Akr1b10__chr6	0.0790798	0.0916435	1.15887	0.0760249
St6galnac3__chr3	0.0680818	0.0788953	1.15883	0.065808
Smap2__chr4	0.109024	0.126331	1.15874	0.10328
Pex6__chr17	0.0815082	0.0944432	1.1587	0.0782657
Cmc1__chr9	0.0830875	0.0962647	1.15859	0.0797201
Acot7__chr4	0.117471	0.136095	1.15854	0.110822
Mrpl15__chr1	0.0962267	0.111475	1.15846	0.0917317
Nicn1__chr9	0.0727359	0.0842552	1.15837	0.0701453
Oma1__chr4	0.0754967	0.0874497	1.15832	0.0727087
Tmem126a__chr7	0.0986009	0.114202	1.15823	0.0938853
Ptk2__chr15	0.0880119	0.101936	1.1582	0.0842404
2510003E04Rik__chr10	0.0796315	0.0922249	1.15814	0.0765345
Bmp7__chr2	0.0663582	0.0768325	1.15785	0.0641966
Cyth1__chr11	0.0857242	0.099248	1.15776	0.0821432
1190002N15Rik__chr9	0.0930129	0.107684	1.15773	0.0888083
Stk4__chr2	0.10247	0.118633	1.15773	0.0973845
Cul9__chr17	0.0682031	0.0789587	1.1577	0.0659213
Hcn2__chr10	0.0671772	0.0777577	1.1575	0.0649627
Nutf2__chr8	0.0703779	0.0814403	1.15719	0.0679504
Abhd14b__chr9	0.0736657	0.0852373	1.15708	0.0710094
Nrn1__chr13	0.0698403	0.0807999	1.15692	0.0674492
Efcab2__chr1	0.0705089	0.0815698	1.15687	0.0680725
Glul__chr1	0.169206	0.195704	1.15661	0.155651
Metap1d__chr2	0.0724442	0.083785	1.15655	0.0698741
Snta1__chr2	0.0790083	0.0913759	1.15654	0.0759588
Mdp1__chr14	0.0960313	0.110999	1.15586	0.0915542
Dock1__chr7	0.0925747	0.107003	1.15585	0.0884089
Kif16b__chr2	0.0744588	0.0859894	1.15486	0.0717458
Gtdc2__chr9	0.0699944	0.0807998	1.15438	0.0675929
Smpdl3a__chr10	0.137881	0.159136	1.15415	0.128785
Hlf__chr11	0.0688884	0.0795028	1.15408	0.0665611
Cdh4__chr2	0.0670474	0.0773757	1.15405	0.0648413
Tamm41__chr6	0.0700956	0.0808886	1.15398	0.0676873
Helq__chr5	0.0715714	0.0825812	1.15383	0.069062
Zfp775__chr6	0.0675313	0.0779182	1.15381	0.0652937
Rnf10__chr5	0.145048	0.167352	1.15377	0.135006
Kcnd2__chr6	0.0694775	0.0801577	1.15372	0.0671108
Adam11__chr11	0.0685253	0.079001	1.15287	0.0662222
Aph1a__chr3	0.0988571	0.113955	1.15272	0.0941174
Ttc28__chr5	0.0937847	0.108104	1.15268	0.0895112
Nr0b2__chr4	0.0681677	0.0785697	1.15259	0.0658883
Fat3__chr9	0.0679866	0.078344	1.15234	0.0657191
Ints4__chr7	0.080707	0.093	1.15232	0.077527
Hsd17b4__chr18	0.0859945	0.0990835	1.15221	0.0823912
Abca12__chr1	0.0658398	0.0758579	1.15216	0.0637114
Pla2r1__chr2	0.0683349	0.07873	1.15212	0.0660444
Ndufaf5__chr2	0.0749509	0.0863524	1.15212	0.0722024
Msantd4__chr9	0.0776704	0.0894801	1.15205	0.0747219
2010107G23Rik__chr10	0.0660515	0.0760743	1.15174	0.0639096
Irx3__chr8	0.0697061	0.0802788	1.15168	0.0673241
Gtpbp1__chr15	0.0853825	0.0983297	1.15164	0.0818296
Mcat__chr15	0.0788832	0.0908397	1.15157	0.0758433
Ush1c__chr7	0.066803	0.0769107	1.15131	0.0646128
Tle2__chr10	0.0682246	0.0785366	1.15115	0.0659414
Ibtk__chr9	0.115418	0.132839	1.15094	0.108994
Gapdh__chr6	0.562031	0.646728	1.1507	0.429951
Nudt4__chr10	0.189126	0.217621	1.15067	0.172303
Nudt22__chr19	0.0751263	0.0864306	1.15047	0.0723651
Ralgapa2__chr2	0.0843603	0.0970334	1.15023	0.0808907
Bag2__chr1	0.0739422	0.0850431	1.15013	0.0712662
Nbea__chr3	0.0780417	0.0897424	1.14993	0.0750653
Rgs5__chr1	0.0890258	0.102361	1.14979	0.0851683
Smarca2__chr19	0.107825	0.123931	1.14937	0.102204
Nlrp10__chr7	0.0699089	0.0803308	1.14908	0.0675131
Mmgt1__chrX	0.100428	0.115354	1.14863	0.0955391
Tmem184c__chr8	0.0818589	0.0940193	1.14855	0.0785889
Mto1__chr9	0.0732813	0.0841635	1.1485	0.0706522
Arhgap26__chr18	0.0791858	0.0909439	1.14849	0.0761229
Ppp1r16b__chr2	0.0789962	0.0907053	1.14822	0.0759476
Gm14403__chr2	0.0709382	0.0814505	1.14819	0.0684724
Ube2o__chr11	0.0788165	0.0904958	1.14818	0.0757817
Tax1bp1__chr6	0.128689	0.147757	1.14817	0.12074
Ppp2r5b__chr19	0.0746418	0.0856777	1.14785	0.0719156
Tstd3__chr4	0.0801533	0.0920034	1.14784	0.0770162
Cenpb__chr2	0.216737	0.24868	1.14739	0.194843
Ppp1r12b__chr1	0.0757636	0.0869271	1.14735	0.072956
Tef__chr15	0.0864403	0.099177	1.14735	0.0828002
Derl2__chr11	0.105421	0.120934	1.14715	0.100044
F11r__chr1	0.12995	0.149066	1.1471	0.121848
Snrnp27__chr6	0.091946	0.105423	1.14658	0.0878356
Josd2__chr7	0.0934204	0.107089	1.14631	0.0891795
1110008L16Rik__chr12	0.0685341	0.0785595	1.14628	0.0662305
Pcdh17__chr14	0.077786	0.089159	1.14621	0.0748288
Bmpr2__chr1	0.134438	0.15408	1.1461	0.12578
Slc11a2__chr15	0.0841677	0.0964645	1.1461	0.0807136
Mrps34__chr17	0.0869561	0.099648	1.14596	0.0832731
Klhl23__chr2	0.0684462	0.0784169	1.14567	0.0661484
Cog6__chr3	0.0800771	0.0917401	1.14565	0.0769458
Dph3__chr14	0.100216	0.114793	1.14546	0.0953471
Fam173b__chr15	0.0740312	0.0847899	1.14533	0.0713488
Slc52a2__chr15	0.0721217	0.0826001	1.14529	0.0695741
Nrbp2__chr15	0.0759182	0.086948	1.14529	0.0730993
Dnlz__chr2	0.0864872	0.0990292	1.14502	0.0828432
Pgap1__chr1	0.0722545	0.0827182	1.14482	0.0696976
Tmem214__chr5	0.0995118	0.11392	1.14479	0.0947102
Mccc2__chr13	0.0715387	0.0818883	1.14467	0.0690315
Immp1l__chr2	0.0898341	0.102826	1.14462	0.0859074
Amy1__chr3	0.0676218	0.0774008	1.14461	0.0653783
Frmd5__chr2	0.0731224	0.0836949	1.14459	0.0705045
Cenpa__chr5	0.106937	0.122383	1.14444	0.101407
Rom1__chr19	0.0714716	0.081794	1.14443	0.068969
Zbtb10__chr3	0.0713286	0.0815803	1.14372	0.0688359
Ube2r2__chr4	0.203329	0.232547	1.1437	0.183976
Fbxo22__chr9	0.0894603	0.102303	1.14356	0.0855657
Aasdhppt__chr9	0.0846021	0.0967408	1.14348	0.0811128
Epn3__chr11	0.0688026	0.0786709	1.14343	0.0664811
Baz2b__chr2	0.113105	0.129308	1.14326	0.106932
Tmem44__chr16	0.0720504	0.0823708	1.14324	0.0695077
5930403L14Rik__chr4	0.0681	0.0778407	1.14303	0.065825
Tgfbr3__chr5	0.0862799	0.0985828	1.14259	0.0826531
Nxnl1__chr8	0.0661256	0.0755461	1.14246	0.063979
Adamts15__chr9	0.0673433	0.0769366	1.14245	0.065118
Rftn1__chr17	0.10506	0.120016	1.14236	0.0997183
A730020M07Rik__chr3	0.0658225	0.0751746	1.14208	0.0636953
Anks6__chr4	0.0672765	0.0768328	1.14205	0.0650555
Golga3__chr5	0.075304	0.0859935	1.14195	0.0725299
Arhgap21__chr2	0.0862989	0.0985429	1.14188	0.0826705
Vps41__chr13	0.0908533	0.10372	1.14162	0.0868385
Cbx5__chr15	0.106991	0.122134	1.14154	0.101455
Cutc__chr19	0.0706906	0.0806934	1.1415	0.0682417
Taf1a__chr1	0.0771089	0.0880185	1.14148	0.0742023
Mzt1__chr14	0.0897484	0.102444	1.14146	0.0858291
Apool__chrX	0.0776621	0.0886469	1.14144	0.0747142
Tpr__chr1	0.132433	0.151162	1.14143	0.124026
Tmem56__chr3	0.065813	0.0751152	1.14134	0.0636863
Aga__chr8	0.0853901	0.0974573	1.14132	0.0818366
Homer1__chr13	0.0829686	0.0946926	1.14131	0.0796108
Gm16516__chr11	0.067879	0.0774619	1.14118	0.0656186
D2hgdh__chr1	0.0716399	0.0817533	1.14117	0.0691257
Znrf1__chr8	0.112297	0.128146	1.14114	0.10621
Hars2__chr18	0.0777891	0.0887671	1.14112	0.0748317
Lnpep__chr17	0.0804831	0.0918257	1.14093	0.0773205
Atg10__chr13	0.073235	0.0835491	1.14084	0.0706092
Hdac11__chr6	0.0683033	0.0779146	1.14072	0.0660149
Acot8__chr2	0.0708033	0.0807386	1.14032	0.0683467
Psmg2__chr18	0.0841053	0.0958988	1.14022	0.0806562
Lamb3__chr1	0.0663793	0.0756715	1.13999	0.0642164
Nacc2__chr2	0.0883813	0.100743	1.13987	0.0845786
Bcap29__chr12	0.0908226	0.10352	1.13981	0.0868105
Mrpl23__chr7	0.105897	0.120684	1.13964	0.100471
Txn2__chr15	0.17774	0.202555	1.13961	0.162826
Ptpn21__chr12	0.0755016	0.086038	1.13955	0.0727131
Usp20__chr2	0.0738904	0.0841986	1.13951	0.0712181
Shpk__chr11	0.0663096	0.07556	1.1395	0.0641511
Vps25__chr11	0.117282	0.133642	1.1395	0.110654
Dmwd__chr7	0.0913359	0.104075	1.13948	0.087279
Spry4__chr18	0.0735987	0.0838569	1.13938	0.0709472
Rab18__chr18	0.114304	0.130228	1.13931	0.108002
Nelfb__chr2	0.0875069	0.0996645	1.13893	0.0837779
Slc25a15__chr8	0.0731273	0.0832842	1.13889	0.0705091
Pcmtd2__chr2	0.082939	0.0944552	1.13885	0.0795835
Rnasek__chr11	0.171424	0.195203	1.13871	0.157522
Cbfa2t3__chr8	0.102498	0.116698	1.13854	0.0974097
Clec1a__chr6	0.0783794	0.0892356	1.13851	0.0753776
Rab12__chr17	0.105481	0.120084	1.13845	0.100097
Car4__chr11	0.0858629	0.0977206	1.1381	0.0822705
Aamp__chr1	0.131242	0.149334	1.13785	0.122982
Inppl1__chr7	0.093987	0.106937	1.13778	0.0896954
Dync1li2__chr8	0.10097	0.114871	1.13767	0.0960292
Gm9899__chr5	0.0678304	0.0771669	1.13764	0.0655732
Rab3gap1__chr1	0.080763	0.0918777	1.13762	0.0775787
Tmem120b__chr5	0.0695961	0.0791691	1.13755	0.0672214
Pmm2__chr16	0.084823	0.0964584	1.13717	0.0813157
Ncor1__chr11	0.175519	0.199592	1.13716	0.160964
Mettl7a1__chr15	0.0901102	0.102464	1.1371	0.0861597
Zc3h6__chr2	0.0695268	0.0790507	1.13698	0.0671568
Mrpl16__chr19	0.0908305	0.103258	1.13682	0.0868177
Arhgef10l__chr4	0.0864488	0.0982708	1.13675	0.082808
Tulp4__chr17	0.0945056	0.107428	1.13674	0.0901673
Cep170b__chr12	0.0728952	0.0828535	1.13661	0.0702934
Ddx24__chr12	0.106999	0.121597	1.13643	0.101462
Gm16793__chr8	0.0665244	0.0755998	1.13642	0.0643521
Mtfr1__chr3	0.0770364	0.0875342	1.13627	0.0741351
Irf2bp1__chr7	0.0822682	0.0934743	1.13622	0.0789659
Micu2__chr14	0.103084	0.117124	1.13621	0.0979379
Slc9a8__chr2	0.0752152	0.0854592	1.1362	0.0724475
Tbc1d12__chr19	0.07334	0.0833237	1.13613	0.0707068
Trim26__chr17	0.0875951	0.0995115	1.13604	0.0838587
Cox17__chr16	0.191357	0.217385	1.13602	0.174147
Plekha1__chr7	0.0936152	0.106342	1.13594	0.0893569
Tnfrsf12a__chr17	0.0923039	0.104851	1.13593	0.0881621
Grwd1__chr7	0.0736543	0.0836649	1.13591	0.0709988
Smpd4__chr16	0.0761687	0.0865199	1.1359	0.0733315
Gstz1__chr12	0.0772824	0.0877714	1.13572	0.0743628
5830417I10Rik__chr3	0.0944534	0.107263	1.13561	0.0901198
Acsf3__chr8	0.0707536	0.0803486	1.13561	0.0683004
Slc25a33__chr4	0.0742503	0.0843187	1.1356	0.0715522
Smim3__chr18	0.0839474	0.0953154	1.13542	0.0805111
Aqp8__chr7	0.0658781	0.0747974	1.13539	0.0637473
Tmc7__chr7	0.0663177	0.0752961	1.13539	0.0641587
1700020G17Rik__chr10	0.0672523	0.076357	1.13538	0.0650329
Akt1s1__chr7	0.0865182	0.0982274	1.13534	0.0828716
Raf1__chr6	0.0978137	0.111049	1.13531	0.0931718
Ano4__chr10	0.0675108	0.0766432	1.13527	0.0652745
Timm9__chr12	0.080777	0.0916803	1.13498	0.0775916
Glo1__chr17	0.0995892	0.11303	1.13496	0.0947803
Marveld1__chr19	0.0827852	0.0939342	1.13467	0.0794419
Bri3__chr5	0.212243	0.240825	1.13467	0.191217
Rnpepl1__chr1	0.0991486	0.112497	1.13463	0.0943814
Bcor__chrX	0.0737046	0.0836272	1.13463	0.0710455
Gpn1__chr5	0.0768956	0.0872434	1.13457	0.0740048
Bod1__chr11	0.101333	0.114939	1.13428	0.0963572
Rb1cc1__chr1	0.104217	0.118208	1.13425	0.0989592
Rsbn1l__chr5	0.0846658	0.0960214	1.13412	0.0811714
Pigc__chr1	0.0801683	0.0909121	1.13402	0.07703
Cryba4__chr5	0.066464	0.0753679	1.13397	0.0642956
Lrig1__chr6	0.0701842	0.0795862	1.13396	0.0677698
Arhgef17__chr7	0.0793193	0.0899446	1.13396	0.0762461
Uvrag__chr7	0.0940316	0.106623	1.13391	0.0897359
Sv2a__chr3	0.0679706	0.0770672	1.13383	0.0657041
Med14__chrX	0.0775584	0.0879306	1.13373	0.0746182
Usp38__chr8	0.0780608	0.0884624	1.13325	0.075083
Socs7__chr11	0.084517	0.095772	1.13317	0.0810347
Nkd2__chr13	0.0703545	0.0797167	1.13307	0.0679285
Klf9__chr19	0.126038	0.142804	1.13302	0.118407
Fcgrt__chr7	0.108918	0.123386	1.13284	0.103185
Npepps__chr11	0.139064	0.157535	1.13283	0.129814
Dnm3__chr1	0.0689348	0.0780875	1.13277	0.0666045
Plp1__chrX	0.0672666	0.0761912	1.13268	0.0650463
Dym__chr18	0.084636	0.0958539	1.13254	0.0811439
AI593442__chr9	0.0665836	0.0754037	1.13247	0.0644075
Gm14420__chr2	0.104567	0.118413	1.13242	0.0992746
Atcay__chr10	0.0656792	0.0743704	1.13233	0.0635611
Nck2__chr1	0.072473	0.0820352	1.13194	0.0699008
Tmem11__chr11	0.0844024	0.095535	1.1319	0.0809293
Gm5577__chr6	0.0830178	0.0939424	1.13159	0.079656
Atxn1l__chr8	0.0752714	0.0851729	1.13154	0.0724997
Pgap3__chr11	0.0673623	0.076205	1.13127	0.0651357
Trappc9__chr15	0.0868421	0.0982402	1.13125	0.0831686
AW209491__chr13	0.0703419	0.079568	1.13116	0.0679168
Rasgrp3__chr17	0.109406	0.12375	1.13111	0.103622
Zfp869__chr8	0.078021	0.0882495	1.1311	0.0750462
Mtg1__chr7	0.0726724	0.0821953	1.13104	0.0700862
Obsl1__chr1	0.0732067	0.0827937	1.13096	0.0705829
Cuedc1__chr11	0.0755454	0.0854246	1.13077	0.0727538
Map3k5__chr10	0.0865393	0.0978498	1.1307	0.082891
Drosha__chr15	0.0883122	0.0998438	1.13058	0.0845154
Abhd17c__chr7	0.0803329	0.0908185	1.13053	0.0771819
Ap3m2__chr8	0.0706699	0.0798816	1.13035	0.0682224
Fam174a__chr1	0.101288	0.114482	1.13026	0.0963166
Prkrir__chr7	0.105285	0.11899	1.13016	0.0999216
Fam210b__chr2	0.0720235	0.0813936	1.1301	0.0694827
Enho__chr4	0.0674245	0.0761945	1.13007	0.0651938
Arhgap5__chr12	0.0939192	0.106097	1.12966	0.0896336
2610015P09Rik__chr16	0.0721544	0.0815099	1.12966	0.0696045
Cmtm4__chr8	0.0762373	0.0861198	1.12963	0.073395
Ngly1__chr14	0.0790293	0.0892697	1.12958	0.0759782
Fcrla__chr1	0.0657974	0.0743153	1.12946	0.0636717
Timm44__chr8	0.0884994	0.0999381	1.12925	0.0846866
Pigyl__chr9	0.0778926	0.0879534	1.12916	0.0749274
Fbxo34__chr14	0.0777783	0.0878087	1.12896	0.0748217
Slc27a4__chr2	0.0842443	0.0951025	1.12889	0.080784
Prmt10__chr8	0.0762975	0.0861214	1.12876	0.0734509
1700025G04Rik__chr1	0.0928975	0.104858	1.12874	0.0887031
Zbtb16__chr9	0.0714453	0.0806339	1.12861	0.0689446
Fign__chr2	0.0726791	0.0820165	1.12847	0.0700925
Dad1__chr14	0.201726	0.227612	1.12832	0.182667
Trim13__chr14	0.0708006	0.0798839	1.12829	0.0683442
Plekhg5__chr4	0.0790124	0.0891372	1.12814	0.0759626
Stradb__chr1	0.0792087	0.0893565	1.12812	0.076144
Efcab14__chr4	0.0903019	0.101862	1.12802	0.0863349
Tex2__chr11	0.0810907	0.0914545	1.12781	0.0778809
Camk2b__chr11	0.0669185	0.0754641	1.1277	0.0647207
Gid4__chr11	0.0808316	0.0911527	1.12769	0.0776419
Ctf1__chr7	0.0671319	0.0757022	1.12766	0.0649203
Dnaja2__chr8	0.159837	0.180208	1.12745	0.147703
Sec22a__chr16	0.074695	0.0842033	1.1273	0.071965
She__chr3	0.0808368	0.0911116	1.12711	0.0776467
Alad__chr4	0.0868743	0.0979139	1.12708	0.0831982
2310002L09Rik__chr4	0.0710221	0.0800436	1.12702	0.0685505
Fbrsl1__chr5	0.0752361	0.0847845	1.12691	0.072467
Slc35a1__chr4	0.0798434	0.0899641	1.12676	0.0767301
Pnpla7__chr2	0.0824508	0.0928785	1.12647	0.0791341
Eid2__chr7	0.0731564	0.0823905	1.12622	0.0705362
Ralgapb__chr2	0.0859577	0.0967944	1.12607	0.0823575
Fam53b__chr7	0.0843126	0.0948921	1.12548	0.0808468
1700040L02Rik__chr10	0.0670236	0.0754273	1.12539	0.064819
Herc1__chr9	0.087434	0.0983955	1.12537	0.0837111
Fgd5__chr6	0.087811	0.0988059	1.12521	0.0840565
Polrmt__chr10	0.0735551	0.0827626	1.12518	0.0709067
Dcun1d1__chr3	0.0920228	0.103524	1.12498	0.0879058
Phax__chr18	0.0829014	0.0932398	1.12471	0.0795489
Epdr1__chr13	0.071776	0.0807263	1.1247	0.0692524
Pdzd2__chr15	0.0818192	0.0920216	1.12469	0.0785523
Erc1__chr6	0.0825287	0.0928105	1.12458	0.0792058
Flt1__chr5	0.120874	0.135919	1.12447	0.113843
Mif4gd__chr11	0.0886645	0.0996778	1.12421	0.0848378
Cep350__chr1	0.0996174	0.111989	1.12419	0.0948058
Chd9__chr8	0.0874439	0.0982848	1.12398	0.0837201
Slc30a6__chr17	0.0731082	0.0821704	1.12396	0.0704914
Dock9__chr14	0.0820883	0.0922622	1.12394	0.0788003
Tdrd3__chr14	0.0785113	0.0882319	1.12381	0.0754996
Aarsd1__chr11	0.0837856	0.0941585	1.1238	0.0803623
Fam160a1__chr3	0.0679071	0.0763125	1.12378	0.0656449
Hccs__chrX	0.0849545	0.0954597	1.12366	0.0814366
Lrrc20__chr10	0.0728035	0.0817772	1.12326	0.0702082
Smurf2__chr11	0.0946126	0.106261	1.12311	0.0902646
Rasl11b__chr5	0.0759337	0.0852744	1.12301	0.0731138
Nipa1__chr7	0.0695995	0.0781516	1.12288	0.0672246
Trappc12__chr12	0.07947	0.0892227	1.12272	0.0763853
Ica1__chr6	0.0716582	0.0804515	1.12271	0.0691427
Nol7__chr13	0.109429	0.122833	1.1225	0.103643
Bmpr1a__chr14	0.0841621	0.0944483	1.12222	0.0807085
Blcap__chr2	0.0893249	0.100237	1.12216	0.0854419
Tcf15__chr2	0.0958608	0.107569	1.12214	0.0913993
Krr1__chr10	0.083295	0.093461	1.12205	0.0799111
Vrk3__chr7	0.0797403	0.0894672	1.12198	0.076635
Kif26a__chr12	0.0811725	0.0910721	1.12196	0.0779563
Ppap2b__chr4	0.184286	0.206754	1.12192	0.168287
Hemk1__chr9	0.0749049	0.0840366	1.12191	0.0721597
Dnajc19__chr3	0.108674	0.121898	1.12169	0.102966
Slc38a9__chr13	0.078897	0.088497	1.12168	0.075856
Pex16__chr2	0.0750051	0.0841316	1.12168	0.0722527
6330403M23Rik__chr18	0.0752173	0.0843603	1.12155	0.0724495
Igdcc4__chr9	0.0681109	0.0763895	1.12155	0.0658352
Pik3r1__chr13	0.0928946	0.104185	1.12154	0.0887004
Ddx26b__chrX	0.0792094	0.0888343	1.12151	0.0761447
Spsb3__chr17	0.0797912	0.0894804	1.12143	0.0766819
Anapc16__chr10	0.117082	0.131282	1.12128	0.110476
Tsr2__chrX	0.0711299	0.0797558	1.12127	0.0686509
Cir1__chr2	0.0918748	0.103014	1.12124	0.0877707
Snapc4__chr2	0.0719457	0.0806586	1.1211	0.0694103
Lrfn4__chr19	0.0698989	0.0783602	1.12105	0.0675039
Aifm2__chr10	0.0759593	0.0851476	1.12096	0.0731374
Gpr137__chr19	0.0862147	0.0966287	1.12079	0.0825933
Pacsin2__chr15	0.120996	0.135592	1.12063	0.113951
Akap17b__chrX	0.0708631	0.0794112	1.12063	0.0684024
Tmc5__chr7	0.0659028	0.0738495	1.12058	0.0637704
Csnk1g2__chr10	0.110491	0.123814	1.12057	0.104595
Dcaf7__chr11	0.10158	0.113823	1.12052	0.0965806
Mgat3__chr15	0.0672983	0.0754081	1.12051	0.0650758
Ppp1r42__chr1	0.0657983	0.0737227	1.12043	0.0636726
Rmdn2__chr17	0.0675519	0.0756857	1.12041	0.0653129
Ntsr2__chr12	0.0667102	0.0747335	1.12027	0.0645259
Bola1__chr3	0.0738659	0.0827312	1.12002	0.0711954
Mapk1ip1__chr7	0.074002	0.0828798	1.11997	0.0713217
Mut__chr17	0.093745	0.104976	1.1198	0.089475
Rasd2__chr8	0.0674793	0.0755591	1.11974	0.0652451
Cd4__chr6	0.0688286	0.0770698	1.11973	0.0665054
Kcnn1__chr8	0.0702523	0.0786488	1.11952	0.0678333
Wnk2__chr13	0.0726779	0.081358	1.11943	0.0700914
[truncated: 17,498 more rows]

## Sheet: Cluster 2
CLUSTER 2
GENEID	mean non cluster	mean cluster	fold change	p value
Kcnq1ot1__chr7	4.1951	115.867	27.6195	0
Grk4__chr5	0.754503	19.8482	26.3063	0
Gm17821__chr12	2.27229	58.8712	25.9082	0
A630089N07Rik__chr16	1.3698	30.4739	22.2469	0
Zfp71-rs1__chr13	0.240133	5.12894	21.3588	2.15418e-07
Gm10785__chr16	0.234606	4.92206	20.9801	4.85196e-06
A130077B15Rik__chr10	0.356258	6.22983	17.4869	1.04942e-07
Synj2bp__chr12	0.234461	2.2052	9.40538	0.00180125
Gm20300__chr10	0.144473	1.31341	9.09099	0.00947884
F830016B08Rik__chr18	0.144587	1.17208	8.1064	0.00949299
Slfn9__chr11	0.125706	0.927938	7.38182	0.118122
Pot1b__chr17	0.144079	0.981613	6.81303	0.134177
Cmah__chr13	0.142646	0.906491	6.35484	0.132935
Psg28__chr7	0.0954845	0.536524	5.61896	0.0910639
Gm7609__chr1	0.128343	0.720503	5.6139	0.120444
Cxcr2__chr1	0.153482	0.850282	5.53993	0.14228
Lipi__chr16	0.108057	0.58801	5.44168	0.102419
4930470H14Rik__chr17	0.13556	0.723308	5.3357	0.126769
D630045M09Rik__chr13	0.105498	0.549228	5.20605	0.10012
Gm10845__chr14	0.539825	2.70209	5.00548	0.01757
D830005E20Rik__chr10	0.108919	0.544996	5.00367	0.103193
A730017L22Rik__chr2	0.100069	0.493485	4.93143	0.0952216
Acad9__chr3	0.140179	0.677897	4.83593	0.130794
Mid1__chrX	0.0903135	0.432134	4.78482	0.0863518
5530601H04Rik__chrX	0.0922584	0.430653	4.6679	0.0881269
Acnat1__chr4	0.102436	0.472059	4.60835	0.0973601
Eif2ak2__chr17	0.127037	0.56647	4.45911	0.119295
Vmn1r58__chr7	0.100053	0.441126	4.40893	0.0952065
Mir1950__chr6	0.0920065	0.402328	4.37282	0.0878971
Aplf__chr6	0.140208	0.596687	4.25572	0.130819
Itga4__chr2	0.116374	0.475957	4.08989	0.109854
9930111J21Rik1__chr11	0.0947184	0.377584	3.98639	0.0903673
Gm17644__chr1	0.106899	0.416219	3.89358	0.10138
Mageb16-ps1__chrX	0.0989004	0.379499	3.83718	0.0941634
Gm3002__chr14	0.104147	0.389688	3.74172	0.0989031
Ifnar1__chr16	0.146602	0.543738	3.70893	0.136359
Slfn8__chr11	0.109515	0.390257	3.56351	0.103727
S100a8__chr3	0.292457	1.03584	3.54184	0.0352604
Skint4__chr4	0.0885353	0.313136	3.53685	0.0847256
4930451C15Rik__chr16	0.0890099	0.302062	3.39358	0.0851599
Maoa__chrX	0.098793	0.331548	3.35599	0.094066
S100a9__chr3	0.309668	1.0294	3.32421	0.0390935
Il1b__chr2	0.475371	1.56772	3.29788	0.0828033
Zfp937__chr2	0.0962609	0.316716	3.29018	0.0917693
Cyp2j5__chr4	0.0899634	0.293101	3.25801	0.0860318
A430107P09Rik__chr14	0.0878191	0.284023	3.23419	0.0840699
6030440G07Rik__chr12	0.0897932	0.289947	3.22905	0.0858762
E330020D12Rik__chr1	0.0988604	0.311537	3.15128	0.0941272
Gm19757__chr6	0.136944	0.430181	3.1413	0.127977
Gimap1__chr6	0.110948	0.34562	3.11516	0.105011
Zfp488__chr14	0.0950153	0.289877	3.05084	0.0906374
Syne1__chr10	0.142149	0.428044	3.01124	0.132504
Zfp277__chr12	0.0937425	0.276167	2.94602	0.0894792
4930511M06Rik__chr18	0.0932366	0.261033	2.79968	0.0890184
Rtp3__chr9	0.0995745	0.27858	2.79771	0.0947738
Gjc3__chr5	0.083886	0.234586	2.79648	0.0804605
Trem1__chr17	0.132863	0.369402	2.78032	0.124411
Tigd4__chr3	0.0811574	0.221539	2.72974	0.0779481
4833422C13Rik__chr13	0.0866544	0.235224	2.7145	0.0830026
Csf3r__chr4	0.139639	0.373747	2.67652	0.130324
Glrx2__chr1	0.158808	0.419228	2.63985	0.146836
Scrn3__chr2	0.0956125	0.249681	2.61139	0.0911802
4930431F12Rik__chr5	0.0881237	0.227315	2.5795	0.0843489
Vmn1r65__chr7	0.113282	0.287324	2.53637	0.107097
Olfr613__chr7	0.0939326	0.237706	2.5306	0.0896522
Zfp560__chr9	0.117834	0.295088	2.50427	0.111153
Il1r2__chr1	0.147361	0.3649	2.47622	0.137014
Adtrp__chr13	0.0801434	0.196309	2.44948	0.0770127
Gm6602__chr3	0.08272	0.202447	2.44738	0.0793877
Ccdc82__chr9	0.147771	0.36044	2.43918	0.137368
Pi15__chr1	0.0949191	0.231036	2.43403	0.0905499
Hmmr__chr11	0.104034	0.247866	2.38255	0.0988016
Oxsm__chr14	0.0851487	0.202775	2.38142	0.0816208
4932411N23Rik__chrX	0.0791818	0.188289	2.37793	0.0761247
Naaa__chr5	0.104629	0.244042	2.33246	0.0993373
4921515E04Rik__chr15	0.0819031	0.19095	2.33142	0.0786353
Gm9159__chrX	0.0815262	0.189002	2.3183	0.078288
Tmem181b-ps__chr17	0.0879251	0.201026	2.28634	0.084167
Slc6a18__chr13	0.0805304	0.183496	2.2786	0.0773698
Gm20597__chr10	0.0805369	0.176789	2.19513	0.0773757
Phf11d__chr14	0.0906499	0.195627	2.15805	0.086659
Cd24a__chr10	0.11726	0.252651	2.15462	0.110642
Trim12c__chr7	0.101158	0.215508	2.13041	0.096206
Cyp2j13__chr4	0.0770577	0.162393	2.10742	0.0741602
6030443J06Rik__chr5	0.0781091	0.163419	2.09219	0.0751331
Olfr856-ps1__chr9	0.0837269	0.174449	2.08355	0.0803142
Rdh18-ps__chr10	0.0911838	0.187838	2.06	0.0871465
Tyms__chr5	0.0992559	0.204018	2.05547	0.0944854
Pcdhb5__chr18	0.0818659	0.168047	2.05272	0.0786011
E130008D07Rik__chr17	0.0816898	0.167148	2.04613	0.0784388
Mcmdc2__chr1	0.0826292	0.166665	2.01703	0.0793041
Tnfaip2__chr12	0.169019	0.339906	2.01105	0.155503
Nfkbia__chr12	0.302428	0.606435	2.00522	0.260979
Aim2__chr1	0.0899003	0.17959	1.99766	0.0859741
4632415L05Rik__chr3	0.0850275	0.169845	1.99753	0.0815095
Mmp9__chr2	0.183553	0.363248	1.97898	0.167689
2810474O19Rik__chr6	0.147983	0.291847	1.97217	0.13755
Cd84__chr1	0.182555	0.358337	1.9629	0.166858
Ms4a6c__chr19	0.175832	0.344848	1.96123	0.161238
C330024D21Rik__chr5	0.0802161	0.156582	1.952	0.0770797
A930016O22Rik__chr7	0.101833	0.197881	1.94319	0.0968161
Dcaf10__chr4	0.111708	0.216496	1.93805	0.105691
Zfp300__chrX	0.0797727	0.154041	1.931	0.0766704
Rdh9__chr10	0.0925777	0.17758	1.91817	0.088418
Tmem69__chr4	0.106254	0.203163	1.91205	0.1008
2410004P03Rik__chr12	0.0816518	0.155428	1.90355	0.0784038
Onecut2__chr18	0.0775571	0.147285	1.89905	0.0746225
Gm4791__chr9	0.0782041	0.148451	1.89825	0.075221
Cxcr4__chr1	0.199529	0.372354	1.86617	0.18088
Neurl3__chr1	0.133282	0.247778	1.85905	0.124778
Pigm__chr1	0.0944075	0.174603	1.84947	0.0900845
G630055G22Rik__chr18	0.079585	0.146429	1.8399	0.0764972
Irak1bp1__chr9	0.0818739	0.150347	1.83632	0.0786085
Cd200r2__chr16	0.0784185	0.143737	1.83295	0.0754193
Gm5577__chr6	0.0871647	0.158932	1.82335	0.0834703
Gm20752__chr3	0.0861704	0.156295	1.81379	0.0825586
A830082K12Rik__chr13	0.0807459	0.146397	1.81306	0.0775686
Decr2__chr17	0.113425	0.205389	1.8108	0.107225
2410007B07Rik__chr3	0.0778873	0.140775	1.80742	0.074928
2700070H01Rik__chr14	0.0813347	0.146876	1.80582	0.0781115
Cdk2ap2__chr19	0.132554	0.238576	1.79984	0.12414
E130112N10Rik__chr6	0.0796513	0.141832	1.78066	0.0765584
Gimap8__chr6	0.0962746	0.168749	1.75279	0.0917818
Tnfrsf10b__chr14	0.0867413	0.151682	1.74868	0.0830822
Bambi-ps1__chr2	0.0853359	0.148756	1.74318	0.0817927
4921508A21Rik__chr11	0.0835096	0.144917	1.73534	0.0801143
Tirap__chr9	0.0992909	0.171342	1.72565	0.094517
Myoz3__chr18	0.0814331	0.140132	1.72082	0.0782022
Xpo7__chr14	0.109324	0.188044	1.72006	0.103556
Gm5607__chr8	0.0819426	0.140678	1.71678	0.0786717
2010015L04Rik__chr4	0.0890397	0.151289	1.69912	0.0851872
Sap18__chr14	0.10464	0.176864	1.69021	0.0993478
5730507C01Rik__chr12	0.0824988	0.139003	1.68491	0.079184
Gm10069__chr6	0.0782635	0.131814	1.68423	0.0752759
Ier5__chr1	0.152758	0.256205	1.6772	0.141659
4933438K21Rik__chr4	0.0767261	0.128558	1.67555	0.0738532
Ptgs2__chr1	0.11402	0.190849	1.67382	0.107756
Vmn2r-ps129__chr17	0.0831796	0.139155	1.67294	0.0798107
Acsm2__chr7	0.0778837	0.130018	1.66939	0.0749246
Sorl1__chr9	0.0986665	0.164399	1.66621	0.0939515
Phf14__chr6	0.1273	0.211908	1.66463	0.119527
Il5ra__chr6	0.0793418	0.132064	1.66449	0.0762725
Cxcl2__chr5	0.345199	0.573565	1.66155	0.291924
Gm19619__chr5	0.0781359	0.129388	1.65594	0.0751579
Abt1__chr13	0.0943535	0.155954	1.65287	0.0900353
Gcnt1__chr19	0.10805	0.178351	1.65064	0.102413
Rdh1__chr10	0.079459	0.130904	1.64744	0.0763808
Nfkbid__chr7	0.134253	0.221015	1.64626	0.125627
Ybey__chr10	0.090741	0.149257	1.64487	0.0867422
Zscan29__chr2	0.0807788	0.132624	1.64182	0.0775989
Tc2n__chr12	0.0784768	0.128292	1.63478	0.0754731
Tpgs2__chr18	0.102783	0.168019	1.6347	0.0976733
Chic1__chrX	0.0780083	0.126673	1.62384	0.07504
Hdc__chr2	0.102872	0.166443	1.61796	0.097754
Invs__chr4	0.0832815	0.134112	1.61035	0.0799044
B020014A21Rik__chr10	0.0758641	0.122093	1.60937	0.0730546
Gm21319__chr12	0.0784996	0.126318	1.60916	0.0754942
Ccrl2__chr9	0.0992305	0.159353	1.60589	0.0944624
Btg1__chr10	0.221962	0.355869	1.60329	0.199052
Isg15__chr4	0.0976019	0.156319	1.6016	0.0929864
Ighmbp2__chr19	0.080971	0.129559	1.60006	0.0777761
2010002M12Rik__chr19	0.0832706	0.13301	1.59732	0.0798944
Ssh2__chr11	0.179812	0.286936	1.59576	0.164569
Cebpb__chr2	0.324435	0.517094	1.59383	0.277067
AY512931__chr8	0.0835563	0.133168	1.59376	0.0801572
Zxda__chrX	0.0823367	0.13086	1.58933	0.0790348
Stk17b__chr1	0.13187	0.20955	1.58906	0.123541
Tbc1d8b__chrX	0.0905953	0.143363	1.58246	0.0866091
4933413L06Rik__chr13	0.076582	0.120691	1.57597	0.0737198
Grk1__chr8	0.0796716	0.12556	1.57596	0.0765771
4933421O10Rik__chr4	0.0860871	0.135407	1.57291	0.0824822
Gm14327__chr2	0.0799243	0.125466	1.56981	0.0768104
Dclre1c__chr2	0.104328	0.163607	1.5682	0.0990663
2210039B01Rik__chr12	0.0804675	0.12599	1.56573	0.0773118
9830147E19Rik__chr7	0.0810204	0.126351	1.55949	0.0778217
D430020J02Rik__chr12	0.0802243	0.125089	1.55925	0.0770873
Cd300a__chr11	0.108264	0.168728	1.55848	0.102606
4933431E20Rik__chr3	0.0817399	0.12732	1.55762	0.078485
Fut8__chr12	0.0965055	0.150079	1.55513	0.0919914
6330410L21Rik__chr3	0.0772336	0.120063	1.55454	0.0743231
Btg2__chr1	0.319317	0.495994	1.5533	0.273357
Zfp607__chr7	0.079454	0.123123	1.54961	0.0763761
BC053393__chr11	0.079761	0.123153	1.54402	0.0766597
Junb__chr8	0.490953	0.757198	1.5423	0.387971
F630028O10Rik__chrX	0.0912907	0.140721	1.54146	0.0872441
1810007D17Rik__chr19	0.076565	0.117752	1.53793	0.073704
Galnt11__chr5	0.0906795	0.139162	1.53466	0.0866861
5730403I07Rik__chr9	0.0756102	0.115995	1.53411	0.0728192
4930528D03Rik__chr13	0.0800175	0.122731	1.5338	0.0768964
Ncf1__chr5	0.201307	0.308391	1.53195	0.182335
Csf2rb__chr15	0.170902	0.261809	1.53193	0.157092
Dynlt1a__chr17	0.0802203	0.122673	1.5292	0.0770836
AA388235__chr17	0.0925679	0.141547	1.52912	0.088409
E030030I06Rik__chr10	0.0847975	0.12953	1.52752	0.0812982
Gm5108__chr5	0.0801002	0.122303	1.52687	0.0769728
Gm19782__chr15	0.0794433	0.121174	1.52529	0.0763662
4931406B18Rik__chr7	0.0752131	0.114456	1.52175	0.072451
Mplkip__chr13	0.0824134	0.125396	1.52155	0.0791054
Serpinb9d__chr13	0.0767944	0.116464	1.51657	0.0739165
Slc7a14__chr3	0.0979187	0.148451	1.51606	0.0932737
Gsr__chr8	0.171163	0.259271	1.51476	0.157312
Car5b__chrX	0.0856681	0.129762	1.51471	0.0820977
Klhl6__chr16	0.110249	0.166922	1.51405	0.104385
Tsc22d3__chrX	0.125295	0.189459	1.51211	0.117759
Dhdh__chr7	0.0814838	0.123199	1.51195	0.0782489
Psmb11__chr14	0.0763225	0.114411	1.49904	0.0734793
Clec5a__chr6	0.10306	0.15396	1.4939	0.097923
Cpne9__chr6	0.0769106	0.114851	1.4933	0.0740241
Slc22a15__chr3	0.0846947	0.126432	1.4928	0.0812038
Slfn4__chr11	0.0991378	0.147962	1.49249	0.0943784
Gm5409__chr6	0.0749845	0.111659	1.4891	0.0722389
Gm9926__chr18	0.076796	0.114329	1.48873	0.0739179
Ercc4__chr16	0.0928951	0.138003	1.48558	0.0887073
Pydc3__chr1	0.084299	0.12517	1.48483	0.0808402
Txnip__chr3	0.341938	0.507375	1.48382	0.289611
Slc30a4__chr2	0.0936836	0.138984	1.48355	0.0894256
E230016K23Rik__chr11	0.0794839	0.117902	1.48334	0.0764037
Fpr2__chr17	0.104051	0.154207	1.48204	0.0988167
Trp53rk__chr2	0.0800627	0.118565	1.4809	0.0769382
A730082K24Rik__chr7	0.0777822	0.114869	1.4768	0.0748308
Rgs2__chr1	0.215273	0.317875	1.47661	0.193676
A330050B17Rik__chr3	0.0794908	0.117277	1.47535	0.0764101
4930526L06Rik__chr19	0.0757494	0.111704	1.47465	0.0729482
Prdm9__chr17	0.0793381	0.116819	1.47242	0.0762691
Lactb2__chr1	0.0926383	0.136237	1.47063	0.0884732
4933426M11Rik__chr12	0.119224	0.175241	1.46984	0.112388
Clec7a__chr6	0.147632	0.216973	1.46969	0.137248
Mir690__chr16	0.0772239	0.113299	1.46714	0.0743141
Gm10390__chr5	0.0779343	0.114268	1.46621	0.0749715
Nfam1__chr15	0.119517	0.174971	1.46399	0.112647
Smn1__chr13	0.0946941	0.138487	1.46247	0.0903452
Map3k3__chr11	0.10258	0.149999	1.46225	0.0974907
Il17ra__chr6	0.124432	0.181802	1.46105	0.116998
R3hdm4__chr10	0.12258	0.17891	1.45953	0.115361
Zfp329__chr7	0.0850297	0.124054	1.45895	0.0815115
Slc26a10__chr10	0.0876876	0.127804	1.4575	0.0839495
Ntrk2__chr13	0.0778353	0.113402	1.45695	0.0748799
2610005L07Rik__chr8	0.0821009	0.119536	1.45596	0.0788176
Ptprc__chr1	0.165789	0.2412	1.45487	0.152771
Gm20815__chrY	0.0752989	0.109502	1.45423	0.0725305
Gjd4__chr18	0.0766592	0.111475	1.45416	0.0737913
Gm20362__chr6	0.322335	0.468683	1.45402	0.275547
Rag2__chr2	0.079859	0.116073	1.45347	0.0767502
Zfp811__chr17	0.0888265	0.1291	1.45339	0.0849922
Dusp1__chr17	0.372836	0.539412	1.44678	0.311227
Fam227a__chr15	0.0794101	0.114865	1.44648	0.0763356
Ecm2__chr13	0.0900112	0.130197	1.44645	0.0860755
Sox2ot__chr3	0.0767894	0.11097	1.44512	0.0739119
2410021H03Rik__chr17	0.0766333	0.110734	1.44498	0.0737673
Snhg11__chr2	0.0773843	0.111745	1.44402	0.0744626
Casc4__chr2	0.0907935	0.13086	1.44129	0.0867901
1700047E10Rik__chr14	0.0747352	0.10746	1.43788	0.0720075
Cd101__chr3	0.0774843	0.111335	1.43688	0.0745552
Chd7__chr4	0.159841	0.229458	1.43554	0.147717
H2-Q4__chr17	0.0778648	0.111744	1.4351	0.0749072
Brip1__chr11	0.0888598	0.127414	1.43388	0.0850227
Gm4944__chr17	0.100293	0.143744	1.43324	0.0954236
Rorb__chr19	0.143351	0.205445	1.43316	0.133546
Emb__chr13	0.158355	0.225968	1.42697	0.14645
Abca8b__chr11	0.0801092	0.114283	1.42659	0.0769811
Nr4a1__chr15	0.252751	0.360513	1.42636	0.223338
C920009B18Rik__chr10	0.0828532	0.118103	1.42545	0.0795103
Hp__chr8	0.113881	0.162082	1.42326	0.107632
A430078G23Rik__chr8	0.0911328	0.129544	1.42149	0.0870999
Slfn10-ps__chr11	0.0804358	0.1143	1.42101	0.0772825
Wdr76__chr2	0.0805439	0.114389	1.4202	0.0773822
Egr2__chr10	0.138077	0.195965	1.41924	0.128964
A230073K19Rik__chr7	0.0749965	0.106306	1.41748	0.07225
D3Bwg0562e__chr3	0.0772442	0.109394	1.41621	0.0743329
Chrm1__chr19	0.0785492	0.11121	1.4158	0.0755401
1810064F22Rik__chr9	0.0784379	0.111027	1.41548	0.0754372
Clec4e__chr6	0.121922	0.172554	1.41528	0.114779
Csf1__chr3	0.145947	0.206556	1.41528	0.135793
Gm5494__chr17	0.0795456	0.11251	1.41441	0.0764607
Siglec5__chr7	0.0792663	0.112032	1.41336	0.0762028
Ccr9__chr9	0.0799066	0.112777	1.41136	0.0767941
Pou3f2__chr4	0.0784566	0.110587	1.40954	0.0754545
Fbxl17__chr17	0.101354	0.14263	1.40725	0.0963832
Adrb2__chr18	0.0841262	0.118321	1.40647	0.0806813
Vps13d__chr4	0.113293	0.159162	1.40487	0.107107
Rgs3__chr4	0.105959	0.148539	1.40185	0.100535
Cx3cr1__chr9	0.101808	0.142699	1.40165	0.0967935
Ptpn6__chr6	0.16951	0.237241	1.39957	0.155918
Robo4__chr9	0.106811	0.149446	1.39917	0.101301
Ap1s3__chr1	0.0787299	0.11015	1.39908	0.0757072
Fgr__chr4	0.122542	0.171395	1.39867	0.115327
Egr1__chr18	0.343782	0.479968	1.39614	0.29092
Trove2__chr1	0.108346	0.151264	1.39612	0.102679
Gm8234__chr3	0.0784292	0.109472	1.3958	0.0754291
Fastkd1__chr2	0.0905333	0.126353	1.39565	0.0865525
Prkcb__chr7	0.138678	0.193077	1.39227	0.129488
Chst3__chr10	0.077696	0.108104	1.39137	0.0747511
A830082N09Rik__chr10	0.0776807	0.108029	1.39068	0.0747369
Marcksl1__chr4	0.194233	0.270108	1.39063	0.176531
4930432J09Rik__chr14	0.0766658	0.106611	1.39059	0.0737974
3110070M22Rik__chr13	0.0756519	0.105188	1.39042	0.0728578
Ushbp1__chr8	0.110478	0.15346	1.38906	0.10459
Dcdc2c__chr12	0.0777714	0.107832	1.38653	0.0748208
Tap1__chr17	0.0924092	0.128115	1.38638	0.0882644
Zfp773__chr7	0.0773468	0.107089	1.38452	0.0744279
Klhl24__chr16	0.108494	0.150207	1.38448	0.102812
Mgll__chr6	0.23159	0.320478	1.38381	0.206727
Gm20172__chr1	0.0767635	0.106091	1.38204	0.0738879
8030423F21Rik__chr5	0.0753892	0.104144	1.38142	0.0726143
Zfp788__chr7	0.08305	0.114648	1.38047	0.0796914
Cplx2__chr13	0.084536	0.116628	1.37963	0.0810579
Spag16__chr1	0.0760032	0.104854	1.3796	0.0731835
A330049N07Rik__chr10	0.0770265	0.106183	1.37852	0.0741314
Pikfyve__chr1	0.0966182	0.133065	1.37722	0.0920938
Skap2__chr6	0.123775	0.169951	1.37306	0.116418
Fuca1__chr4	0.133513	0.183251	1.37253	0.12498
Surf6__chr2	0.0869592	0.119195	1.3707	0.083282
Lst1__chr17	0.130061	0.178168	1.36989	0.121954
Cnga3__chr1	0.0784428	0.107377	1.36885	0.0754417
Tbc1d24__chr17	0.0902482	0.123146	1.36452	0.0862921
Zfp37__chr4	0.0770262	0.105081	1.36422	0.0741311
Cd300lf__chr11	0.137528	0.187496	1.36333	0.128486
Veph1__chr3	0.07572	0.103003	1.36032	0.072921
Samhd1__chr2	0.173463	0.235692	1.35875	0.159248
Lefty2__chr1	0.0781754	0.106175	1.35816	0.0751945
4831440E17Rik__chr5	0.0784507	0.106534	1.35797	0.0754491
Ctla2a__chr13	0.158857	0.215685	1.35773	0.146878
9230114K14Rik__chr5	0.089764	0.121603	1.3547	0.0858496
Nrbp2__chr15	0.0837965	0.113421	1.35353	0.0803781
2310014L17Rik__chr7	0.10107	0.136721	1.35273	0.0961265
Gm10745__chr3	0.0760185	0.10269	1.35086	0.0731977
Gm15663__chr10	0.0798642	0.107884	1.35084	0.0767549
Lcmt2__chr2	0.0926591	0.125164	1.3508	0.0884922
Gadd45b__chr10	0.107122	0.144691	1.35071	0.10158
Midn__chr10	0.140119	0.189135	1.34981	0.130741
Slco4a1__chr2	0.0780498	0.105312	1.34929	0.0750783
Btbd16__chr7	0.0778762	0.105078	1.34929	0.0749177
Trim30b__chr7	0.0870898	0.117479	1.34894	0.0834017
B130006D01Rik__chr11	0.0798962	0.107721	1.34826	0.0767844
Soat2__chr15	0.0828249	0.111513	1.34637	0.0794842
C230091D08Rik__chr7	0.0808357	0.108787	1.34578	0.0776514
Rhox8__chrX	0.0904515	0.121657	1.345	0.0864778
Clrn1__chr3	0.0776554	0.104404	1.34446	0.0747135
Mrap2__chr9	0.0765575	0.102823	1.34308	0.0736971
Gm4872__chr6	0.0745494	0.100084	1.34251	0.0718352
5930430L01Rik__chr5	0.0790346	0.106095	1.34239	0.0759887
Cd33__chr7	0.0861844	0.11568	1.34224	0.0825715
Pik3cd__chr4	0.104885	0.140726	1.34172	0.099568
Uba1y__chrY	0.0779696	0.104553	1.34094	0.0750042
Gm10432__chr12	0.0770697	0.103338	1.34084	0.0741714
Cd3d__chr9	0.0842097	0.112893	1.34061	0.0807581
Dnalc1__chr12	0.0772912	0.103605	1.34045	0.0743764
Cd52__chr4	0.298669	0.399784	1.33855	0.258196
Atf2__chr2	0.110499	0.147879	1.33828	0.104609
Pisd-ps2__chr17	0.0766765	0.102594	1.33801	0.0738073
1700128F08Rik__chr9	0.079195	0.105701	1.33469	0.0761369
Rin3__chr12	0.0948059	0.126494	1.33424	0.0904469
Aqp7__chr4	0.0847435	0.113065	1.3342	0.0812486
Trim43b__chr9	0.0787094	0.104884	1.33254	0.0756882
Fcer2a__chr8	0.07586	0.101003	1.33144	0.0730507
8430403D17Rik__chr11	0.075581	0.100624	1.33134	0.0727921
4930448I06Rik__chr1	0.0752476	0.100099	1.33026	0.0724829
Tle3__chr9	0.112766	0.14992	1.32949	0.106636
Mettl7a1__chr15	0.0996592	0.132329	1.32781	0.0948504
Tcf20__chr15	0.0880291	0.116884	1.32779	0.0842623
Pisd-ps1__chr11	0.106127	0.140886	1.32753	0.100685
Ifitm1__chr7	0.110182	0.146202	1.32691	0.104325
Phex__chrX	0.0764159	0.101378	1.32666	0.0735659
Nhlh2__chr3	0.0775679	0.102817	1.32551	0.0746325
AI839979__chr5	0.0813856	0.107815	1.32475	0.0781584
Scd3__chr19	0.0773079	0.102409	1.32469	0.0743918
Ly6c1__chr15	0.121107	0.160386	1.32433	0.114057
Klf11__chr12	0.081386	0.107571	1.32174	0.0781588
Sema4a__chr3	0.0985258	0.130211	1.32159	0.093824
Trem3__chr17	0.0793083	0.104811	1.32157	0.0762416
Mcl1__chr3	0.464907	0.614251	1.32123	0.371819
Nfkbiz__chr16	0.138488	0.182971	1.32121	0.129322
Neb__chr2	0.0777875	0.102765	1.3211	0.0748357
Il1rap__chr16	0.0854908	0.112894	1.32054	0.0819349
Gm5483__chr16	0.0822285	0.108536	1.31993	0.0789351
Cdkn1b__chr6	0.118106	0.155887	1.31989	0.111394
Lilra6__chr7	0.0828861	0.109356	1.31935	0.0795406
Gbp4__chr5	0.0858921	0.113312	1.31924	0.0823032
4922501C03Rik__chr9	0.0824242	0.108687	1.31863	0.0791153
Arpp21__chr9	0.0747658	0.0985762	1.31847	0.072036
Clec2e__chr6	0.0779023	0.102667	1.31789	0.0749419
5730577I03Rik__chr9	0.0786288	0.10353	1.31669	0.0756136
1700094D03Rik__chr3	0.0828915	0.10909	1.31606	0.0795455
Stxbp2__chr8	0.109033	0.143464	1.31578	0.103296
Tug1__chr11	0.11917	0.156672	1.31469	0.112339
Dennd5b__chr6	0.0946284	0.124404	1.31466	0.0902855
Gm4297__chrX	0.0752689	0.0988551	1.31336	0.0725027
Mpv17__chr5	0.112953	0.148219	1.31221	0.106804
2700089I24Rik__chr19	0.0744911	0.0977028	1.3116	0.071781
Cd300ld__chr11	0.141778	0.185708	1.30985	0.132182
Grik3__chr4	0.0756329	0.0990039	1.30901	0.0728402
Rab11fip1__chr8	0.0843576	0.110335	1.30795	0.080894
Gcc2__chr10	0.0946256	0.123757	1.30786	0.0902829
Ripply3__chr16	0.0800951	0.104746	1.30777	0.0769681
2210016F16Rik__chr13	0.105915	0.138512	1.30776	0.100495
Trappc9__chr15	0.0962065	0.125745	1.30703	0.0917199
Slc25a46__chr18	0.119784	0.156485	1.3064	0.112884
Cyp4f18__chr8	0.102033	0.133293	1.30638	0.0969961
Ermap__chr4	0.077245	0.100886	1.30605	0.0743336
1700016D06Rik__chr8	0.0759855	0.0992403	1.30604	0.0731671
Rara__chr11	0.103718	0.135312	1.30462	0.0985167
Prl7c1__chr13	0.0753652	0.0983206	1.30459	0.072592
Gzf1__chr2	0.0844601	0.110186	1.30459	0.0809882
Gm15446__chr5	0.079314	0.103472	1.30459	0.0762468
Oca2__chr7	0.0742769	0.0968904	1.30445	0.0715822
Cd8a__chr6	0.0758655	0.0989236	1.30393	0.0730559
Adam28__chr14	0.075863	0.098893	1.30357	0.0730536
Airn__chr17	0.0820492	0.10695	1.30349	0.07877
Mrgpra4__chr7	0.0754546	0.0983124	1.30294	0.0726749
Ier2__chr8	0.204093	0.265714	1.30193	0.18461
Pla2g4b__chr2	0.0799221	0.104031	1.30166	0.0768084
Lcn2__chr2	0.0951572	0.12382	1.30122	0.0907663
1700095A21Rik__chr4	0.0755868	0.0983326	1.30092	0.0727975
Clec2h__chr6	0.07699	0.100155	1.30088	0.0740976
Cbl__chr9	0.0871946	0.113416	1.30072	0.0834978
Hist4h4__chr6	0.0758535	0.0985686	1.29946	0.0730448
Sgpp2__chr1	0.079774	0.103623	1.29896	0.0766717
Carns1__chr19	0.0884351	0.114836	1.29854	0.084634
Ndst3__chr3	0.0765468	0.0993789	1.29828	0.0736871
Tbx18__chr9	0.0865457	0.112301	1.2976	0.0829028
Diap1__chr18	0.085225	0.110563	1.29731	0.0816909
Dok3__chr13	0.103984	0.13481	1.29645	0.0987565
Gm10324__chr13	0.0745133	0.0965784	1.29612	0.0718016
Zfp869__chr8	0.0865352	0.112147	1.29597	0.0828933
D16Ertd472e__chr16	0.0880192	0.113932	1.2944	0.0842532
6330407A03Rik__chr4	0.0856878	0.110907	1.29432	0.0821158
2610015P09Rik__chr16	0.0800442	0.103489	1.2929	0.0769211
Scin__chr12	0.0757139	0.0978313	1.29212	0.0729153
4930539E08Rik__chr17	0.0755768	0.0975757	1.29108	0.0727882
Cd209c__chr8	0.119581	0.154246	1.28988	0.112704
Cxcl9__chr5	0.0809105	0.104287	1.28892	0.0777203
Gm6225__chr18	0.0779386	0.100455	1.2889	0.0749755
Gpr35__chr1	0.114698	0.14781	1.28869	0.10836
Lonrf1__chr8	0.0813025	0.104761	1.28853	0.0780818
Arrdc4__chr7	0.097247	0.125304	1.28851	0.0926645
Gm5464__chr14	0.075915	0.0978162	1.2885	0.0731017
Btnl2__chr17	0.0763253	0.0983209	1.28818	0.0734819
Trim52__chr14	0.0771857	0.0993387	1.28701	0.0742788
Gm15401__chr6	0.0777308	0.0999614	1.28599	0.0747832
Rgs19__chr2	0.110437	0.142012	1.28591	0.104553
Ttbk2__chr2	0.0849917	0.1092	1.28483	0.0814766
Pstpip1__chr9	0.103254	0.132581	1.28403	0.098098
Gm16702__chr17	0.0787294	0.10098	1.28262	0.0757066
Jpx__chrX	0.0787128	0.100895	1.28181	0.0756913
Dkk2__chr3	0.0861523	0.110318	1.2805	0.0825421
Cytip__chr2	0.104644	0.133955	1.2801	0.0993508
Gpcpd1__chr2	0.128152	0.164	1.27973	0.120277
Pik3r5__chr11	0.103095	0.131927	1.27966	0.0979549
Malt1__chr18	0.0824182	0.105461	1.27958	0.0791098
Coro1a__chr7	0.204258	0.261249	1.27901	0.184746
Tspan15__chr10	0.0853836	0.109182	1.27872	0.0818365
Gm6313__chr6	0.075739	0.0968379	1.27857	0.0729386
Arap3__chr18	0.12078	0.154304	1.27756	0.113768
Creg2__chr1	0.0793946	0.101407	1.27725	0.0763213
Zfp111__chr7	0.081976	0.104601	1.276	0.0787025
A630020A06__chr15	0.0763997	0.0974809	1.27593	0.0735509
Tex13__chrX	0.0750407	0.0957066	1.2754	0.072291
Rab27a__chr9	0.0810869	0.103338	1.27441	0.077883
2310005G13Rik__chr16	0.0748053	0.0952584	1.27342	0.0720726
Dkc1__chrX	0.104708	0.133166	1.27179	0.0994084
Cr2__chr1	0.0760348	0.0966861	1.2716	0.0732127
Osgin1__chr8	0.0805215	0.102347	1.27106	0.0773615
Zxdb__chrX	0.0785349	0.0998141	1.27095	0.0755269
2310034O05Rik__chr5	0.0778804	0.0989603	1.27067	0.0749216
Aqp1__chr6	0.182936	0.232405	1.27042	0.167175
Slc18b1__chr10	0.0813555	0.103303	1.26978	0.0781307
Rasgrp4__chr7	0.0963359	0.122294	1.26946	0.0918374
Fmnl1__chr11	0.135947	0.172521	1.26903	0.127107
Gm5084__chr13	0.0765977	0.097124	1.26798	0.0737343
Gm14827__chrX	0.0752906	0.0953662	1.26664	0.0725228
Chrdl1__chrX	0.0749842	0.0949529	1.2663	0.0722386
Rps6ka1__chr4	0.105965	0.134173	1.2662	0.10054
Arrb2__chr11	0.147813	0.18715	1.26613	0.137404
Spty2d1__chr7	0.0905981	0.114695	1.26598	0.0866117
Cpne8__chr15	0.211041	0.267085	1.26556	0.190257
Crebrf__chr17	0.103861	0.131433	1.26547	0.0986454
Tceanc2__chr4	0.0925392	0.117091	1.26531	0.0883829
Magt1__chrX	0.195676	0.247416	1.26442	0.177718
Nuf2__chr1	0.0940372	0.118853	1.2639	0.0897475
4933401D09Rik__chr17	0.0758201	0.0957811	1.26327	0.0730138
Pxn__chr5	0.156561	0.19775	1.26309	0.144917
5430421F17Rik__chr8	0.0753905	0.0951162	1.26165	0.0726154
Cd55__chr1	0.0838315	0.105729	1.2612	0.0804104
A230072C01Rik__chrX	0.0806825	0.101733	1.26091	0.0775101
Skint5__chr4	0.0744241	0.0937617	1.25983	0.0717188
Gm11696__chr11	0.0804947	0.101369	1.25933	0.0773369
Zzef1__chr11	0.101591	0.127888	1.25885	0.0965976
Kctd14__chr7	0.0765059	0.0962974	1.25869	0.0736493
Tbc1d10b__chr7	0.106395	0.133888	1.2584	0.100927
Gm4841__chr18	0.0766419	0.0964213	1.25808	0.0737752
Zfp944__chr17	0.0828248	0.104192	1.25798	0.0794841
2010109I03Rik__chr15	0.0759174	0.0954887	1.2578	0.073104
Tmod2__chr9	0.0787132	0.0989924	1.25763	0.0756917
Gm10635__chr9	0.0764396	0.0961221	1.25749	0.0735879
Ptgs1__chr2	0.104916	0.131927	1.25745	0.099596
Ltb4r1__chr14	0.0910389	0.114328	1.25581	0.0870143
Zfp459__chr13	0.0751552	0.0943684	1.25565	0.0723972
Prlr__chr15	0.0764155	0.0959295	1.25537	0.0735655
Rasgrf2__chr13	0.0788473	0.0989795	1.25533	0.0758156
Med17__chr9	0.0831369	0.104356	1.25523	0.0797714
Tnrc6a__chr7	0.166974	0.209523	1.25482	0.153775
Bpifc__chr10	0.0746525	0.0936569	1.25457	0.0719308
Crp__chr1	0.0745617	0.0935253	1.25433	0.0718465
Gm10789__chr16	0.0774323	0.0971049	1.25406	0.074507
B230206H07Rik__chr7	0.0757844	0.0950377	1.25405	0.0729807
BC021785__chr10	0.0766065	0.0960277	1.25352	0.0737425
Cdc25a__chr9	0.0879857	0.110261	1.25317	0.0842225
Efcc1__chr6	0.0804469	0.100803	1.25304	0.0772927
Snai2__chr16	0.0840144	0.105257	1.25285	0.0805785
Pim3__chr15	0.108045	0.135356	1.25277	0.102409
Samsn1__chr16	0.0903545	0.113183	1.25266	0.0863891
Phxr4__chr9	0.0808096	0.101178	1.25206	0.0776273
2810442I21Rik__chr11	0.0758426	0.0949446	1.25186	0.0730346
Pfkfb3__chr2	0.106402	0.133178	1.25165	0.100933
5430440P10Rik__chr14	0.0783978	0.0981172	1.25153	0.0754001
4930500J02Rik__chr2	0.0758448	0.0949064	1.25132	0.0730367
Sp1__chr15	0.143088	0.179025	1.25116	0.133318
4933409K07Rik__chr4	0.0774	0.0968308	1.25104	0.0744771
Mrps2__chr2	0.0961631	0.120298	1.25098	0.0916805
Prkag3__chr1	0.0803631	0.100491	1.25046	0.0772154
Srgap2__chr1	0.107173	0.134008	1.25039	0.101626
Acin1__chr14	0.142541	0.178162	1.2499	0.132844
Ikzf1__chr11	0.096497	0.120577	1.24954	0.0919837
Fem1c__chr18	0.0805508	0.100606	1.24897	0.0773886
Ppp1r12b__chr1	0.0845873	0.105595	1.24836	0.0811051
Gm14005__chr2	0.0897805	0.112073	1.2483	0.0858646
Dppa2__chr16	0.0748548	0.0934318	1.24817	0.0721186
Ifi203__chr1	0.127861	0.159527	1.24766	0.12002
Ccdc36__chr9	0.0776555	0.096872	1.24746	0.0747135
1700091H14Rik__chr14	0.0750437	0.0935666	1.24683	0.0722938
Rab27b__chr18	0.0765108	0.0953777	1.24659	0.0736538
5430427O19Rik__chrX	0.0830289	0.103449	1.24594	0.079672
Rpusd2__chr2	0.0765588	0.0953825	1.24587	0.0736983
Sipa1__chr19	0.144415	0.179755	1.24471	0.134468
Pram1__chr17	0.0807972	0.100564	1.24465	0.0776159
Scgb2b23-ps__chr7	0.0755076	0.0939598	1.24438	0.072724
Phf20__chr2	0.111065	0.138206	1.24437	0.105115
Csgalnact1__chr8	0.0888592	0.110521	1.24378	0.0850221
4931428L18Rik__chr1	0.0754974	0.0938909	1.24363	0.0727146
Anapc10__chr8	0.0854873	0.106258	1.24297	0.0819317
1700073E17Rik__chr6	0.0778833	0.0967704	1.2425	0.0749243
Diap2__chrX	0.106485	0.132243	1.2419	0.101007
Asxl2__chr12	0.107591	0.133598	1.24172	0.102002
Nrgn__chr9	0.0836861	0.103883	1.24134	0.0802767
1810033B17Rik__chr8	0.0943253	0.117082	1.24126	0.0900096
1810007I06Rik__chr16	0.0766106	0.0950056	1.24011	0.0737462
Grm5__chr7	0.0744983	0.0923738	1.23995	0.0717877
Amer2__chr14	0.0767022	0.0951037	1.23991	0.073831
Csmd3__chr15	0.0749119	0.0928795	1.23985	0.0721715
Xab2__chr8	0.089165	0.110532	1.23963	0.0853018
Nfkb2__chr19	0.111238	0.13787	1.23942	0.10527
Fyco1__chr9	0.145177	0.179842	1.23878	0.135127
Slfn2__chr11	0.145152	0.179716	1.23812	0.135105
BC018473__chr11	0.0759111	0.0939453	1.23757	0.0730981
Fam126b__chr1	0.0939453	0.116264	1.23757	0.0896638
Fam65b__chr13	0.0863265	0.106826	1.23747	0.0827019
Ier3__chr17	0.414464	0.512725	1.23708	0.339314
Sh2d4a__chr8	0.0772663	0.0954994	1.23598	0.0743534
Chmp2b__chr16	0.103199	0.127543	1.23589	0.098049
Stfa2l1__chr16	0.0771927	0.0953788	1.23559	0.0742852
4930511A02Rik__chr12	0.0744254	0.0919563	1.23555	0.07172
Fam124b__chr1	0.0752736	0.0929518	1.23485	0.0725071
Smek2__chr11	0.120143	0.148357	1.23484	0.113202
Gm5766__chr16	0.0788769	0.097391	1.23472	0.0758429
Liph__chr16	0.0761702	0.0940093	1.2342	0.0733383
B230208H11Rik__chr10	0.0789019	0.0973606	1.23395	0.075866
Gm3143__chr3	0.0749652	0.0924625	1.23341	0.072221
Slu7__chr11	0.10417	0.128482	1.23338	0.0989245
Rbm34__chr8	0.0905623	0.111684	1.23323	0.086579
Gm11127__chr17	0.0773762	0.09536	1.23242	0.074455
Rbm47__chr5	0.10459	0.128843	1.23189	0.0993027
Bard1__chr1	0.0815992	0.100475	1.23132	0.0783553
Slc38a6__chr12	0.0939597	0.115682	1.23118	0.0896769
Twistnb__chr12	0.0934894	0.115095	1.23111	0.0892487
Clec2g__chr6	0.0783006	0.0963506	1.23052	0.0753102
Taok2__chr7	0.124827	0.153583	1.23036	0.117347
Gm5177__chr10	0.0782293	0.0961687	1.22932	0.0752443
Pigr__chr1	0.0766761	0.0942559	1.22927	0.0738069
Ptprb__chr10	0.175098	0.215225	1.22917	0.160622
L3mbtl4__chr17	0.0755408	0.0928465	1.22909	0.0727548
Zfp599__chr9	0.0768049	0.0943739	1.22875	0.0739262
Ndel1__chr11	0.1772	0.21768	1.22844	0.162385
St8sia1__chr6	0.0758447	0.0931599	1.2283	0.0730366
Ipcef1__chr10	0.0752227	0.0923755	1.22803	0.0724598
9030025P20Rik__chr17	0.0779594	0.0957237	1.22787	0.0749947
A530065N20Rik__chr13	0.0745718	0.0915211	1.22729	0.0718559
Lims2__chr18	0.132095	0.162099	1.22714	0.123738
Kcnk6__chr7	0.0951829	0.116793	1.22704	0.0907897
Necab1__chr4	0.0776314	0.0952356	1.22677	0.0746913
5830417I10Rik__chr3	0.105586	0.129526	1.22673	0.100199
Ociad2__chr5	0.0805167	0.0986998	1.22583	0.0773571
C130046K22Rik__chr11	0.0817891	0.100234	1.22552	0.0785304
Ublcp1__chr11	0.0903549	0.110731	1.22551	0.0863896
A630072M18Rik__chr5	0.0822668	0.100813	1.22545	0.0789704
Gm12992__chr4	0.0766678	0.0939396	1.22528	0.0737992
Hcls1__chr16	0.159547	0.195486	1.22525	0.147467
Rasgrp2__chr19	0.0841914	0.103134	1.22499	0.0807413
Rapgef4__chr2	0.088165	0.107974	1.22469	0.0843867
Zfp52__chr17	0.0804347	0.0984874	1.22444	0.0772815
Ccr1__chr9	0.150591	0.184285	1.22375	0.139796
Trpm3__chr19	0.0786875	0.0962343	1.22299	0.0756679
Gad1__chr2	0.0782601	0.095707	1.22294	0.0752728
Gm5803__chr15	0.0752728	0.0920313	1.22264	0.0725063
1200014J11Rik__chr11	0.105841	0.129358	1.22219	0.100429
Wash__chr17	0.0957036	0.116951	1.22201	0.091263
H2-T23__chr17	0.10497	0.128257	1.22184	0.0996444
Fpr1__chr17	0.0838865	0.102474	1.22158	0.0804609
Slc29a3__chr10	0.0945743	0.115502	1.22128	0.0902363
H2-Q10__chr17	0.0834384	0.101853	1.2207	0.0800488
Fam211b__chr10	0.0751426	0.0917187	1.2206	0.0723855
Gm10872__chr15	0.0777126	0.0948513	1.22054	0.0747664
Ubald1__chr16	0.140329	0.171189	1.21991	0.130924
Tppp3__chr8	0.0950591	0.115935	1.21961	0.0906772
Srek1__chr13	0.108523	0.132347	1.21953	0.102838
3110052M02Rik__chr17	0.0791173	0.0964569	1.21916	0.0760651
D3Ertd751e__chr3	0.080738	0.0984318	1.21915	0.0775613
Rcsd1__chr1	0.110885	0.13518	1.21911	0.104954
1700034H15Rik__chr1	0.0771111	0.0939894	1.21888	0.0742097
Golga2__chr2	0.10611	0.129321	1.21874	0.100671
2610037D02Rik__chr15	0.0794281	0.0967638	1.21826	0.0763522
Hsf2bp__chr17	0.0746112	0.0908943	1.21824	0.0718925
Ccdc30__chr4	0.079435	0.0967628	1.21814	0.0763586
Prr14__chr7	0.0884827	0.107715	1.21736	0.0846775
Terf2ip__chr8	0.0886429	0.107851	1.2167	0.0848242
Cks2__chr13	0.107806	0.131148	1.21652	0.102194
Pgr__chr9	0.0744839	0.0905835	1.21615	0.0717743
8430429K09Rik__chr11	0.0786699	0.0956726	1.21613	0.0756517
Chrnb4__chr9	0.075666	0.0919807	1.21561	0.0728709
4930444A02Rik__chr8	0.0881798	0.107137	1.21499	0.0844002
Eif2s3y__chrY	0.11043	0.134163	1.21492	0.104547
Zfp217__chr2	0.0996004	0.120996	1.21482	0.0947972
Cybrd1__chr2	0.0782927	0.0950988	1.21466	0.0753029
Speer7-ps1__chr5	0.0745972	0.0905607	1.214	0.0718795
Gmfg__chr7	0.106645	0.129405	1.21342	0.101152
Slc35e2__chr4	0.0818135	0.0992538	1.21317	0.0785528
Gpr4__chr7	0.0866133	0.105036	1.2127	0.0829648
1700029F12Rik__chr13	0.0752479	0.0912387	1.21251	0.0724833
Cts8-ps__chr13	0.0760241	0.0921625	1.21228	0.0732028
Ppp1r15a__chr7	0.136616	0.165593	1.2121	0.127691
A930007I19Rik__chr19	0.0755285	0.0915383	1.21197	0.0727434
Pdpk1__chr17	0.100074	0.121273	1.21183	0.0952259
Gm16796__chr2	0.0764018	0.0925459	1.2113	0.0735529
Sfxn4__chr19	0.0780047	0.0944858	1.21128	0.0750366
Cd300lb__chr11	0.0949527	0.115	1.21113	0.0905804
4921504A21Rik__chr5	0.0772412	0.0935475	1.21111	0.0743301
Gm14420__chr2	0.117055	0.141761	1.21107	0.11046
Impg2__chr16	0.0769566	0.0931758	1.21076	0.0740667
A430088P11Rik__chr15	0.0748455	0.0906028	1.21053	0.07211
Bglap3__chr3	0.0792393	0.0959173	1.21048	0.0761778
Slc23a1__chr18	0.0801157	0.0969396	1.21	0.0769871
Zfp113__chr5	0.0786618	0.0951576	1.20971	0.0756441
Pnpla1__chr17	0.0811988	0.0982074	1.20947	0.0779863
Rnf111__chr9	0.101833	0.123155	1.20938	0.0968157
Zfp941__chr7	0.0770741	0.0932018	1.20925	0.0741754
9130409I23Rik__chr1	0.0756617	0.0914925	1.20923	0.0728669
Rab11fip2__chr19	0.0824114	0.0996205	1.20882	0.0791036
Tnfaip3__chr10	0.0901876	0.108993	1.20851	0.0862367
Nbeal2__chr9	0.0886709	0.107126	1.20813	0.0848497
Upf2__chr2	0.106229	0.128319	1.20794	0.100778
Vmn2r29__chr7	0.0764569	0.0923425	1.20777	0.0736039
Abcb1a__chr5	0.0895144	0.108034	1.20689	0.0856213
Tigit__chr16	0.0761753	0.0919243	1.20675	0.073343
Lpcat2__chr8	0.0948212	0.114406	1.20655	0.0904608
2810006K23Rik__chr5	0.0898399	0.108378	1.20635	0.0859189
Stoml1__chr9	0.0810215	0.0977371	1.20631	0.0778228
Vwa3a__chr7	0.0775943	0.0935733	1.20593	0.0746569
A230077H06Rik__chr7	0.0757749	0.0913675	1.20577	0.0729719
Ptcra__chr17	0.0756649	0.0912117	1.20547	0.0728699
Psg23__chr7	0.084722	0.102121	1.20536	0.0812288
Mllt3__chr4	0.083654	0.100823	1.20524	0.0802471
Vmn2r42__chr7	0.0760928	0.0917023	1.20514	0.0732665
Ankfy1__chr11	0.110915	0.133663	1.2051	0.104981
Slpi__chr2	0.112423	0.135426	1.20461	0.10633
Hyal1__chr9	0.0790702	0.0952424	1.20453	0.0760216
Polr3f__chr2	0.0788228	0.0949424	1.2045	0.075793
Tnrc6b__chr15	0.121618	0.146457	1.20424	0.114509
Pygl__chr12	0.1174	0.141366	1.20413	0.110767
Usp17la__chr7	0.0753436	0.090713	1.20399	0.0725719
D4Wsu53e__chr4	0.310096	0.373162	1.20338	0.266625
Mex3b__chr7	0.0782172	0.094123	1.20335	0.0752332
N4bp2l2__chr5	0.102365	0.123139	1.20294	0.0972967
Lysmd2__chr9	0.0809562	0.0973687	1.20273	0.0777626
Endov__chr11	0.0827597	0.0995306	1.20265	0.0794242
Arnt__chr3	0.0966945	0.11628	1.20255	0.092163
Gm14023__chr2	0.0748971	0.0900579	1.20242	0.0721578
Gpihbp1__chr15	0.162859	0.195765	1.20205	0.150286
Cbln3__chr14	0.0769685	0.0925029	1.20183	0.0740776
Tpmt__chr13	0.0794906	0.0954818	1.20117	0.07641
4930474G06Rik__chr18	0.0771752	0.0926854	1.20097	0.074269
Slc20a1__chr2	0.13108	0.15731	1.2001	0.122849
Trub1__chr19	0.0837027	0.100441	1.19997	0.0802919
Kcna2__chr3	0.080481	0.0965375	1.19951	0.0773242
Stxbp5l__chr16	0.0749285	0.0898389	1.19899	0.072187
Rph3a__chr5	0.0754705	0.0904811	1.19889	0.0726897
Il1f9__chr2	0.0798238	0.0956173	1.19785	0.0767177
Dlgap1__chr17	0.0749744	0.0897354	1.19688	0.0722295
Siglece__chr7	0.0854769	0.102302	1.19684	0.0819222
Zfp36__chr7	0.421022	0.503655	1.19627	0.343633
Il1rl1__chr1	0.0784032	0.0937823	1.19615	0.0754051
Uspl1__chr5	0.0884527	0.105797	1.19609	0.08465
Dnajc5g__chr5	0.0743134	0.0888753	1.19595	0.0716161
Luc7l__chr17	0.123574	0.147776	1.19584	0.11624
Utp23__chr15	0.0843072	0.10081	1.19574	0.0808476
Sde2__chr1	0.102203	0.122132	1.19499	0.0971504
AI467606__chr7	0.0860313	0.102794	1.19485	0.082431
Hmha1__chr10	0.136367	0.162921	1.19473	0.127473
Naip2__chr13	0.090429	0.108036	1.1947	0.0864572
Zc3h12a__chr4	0.0982411	0.117358	1.19459	0.093566
BC031361__chr16	0.0776836	0.0927923	1.19449	0.0747395
Kdm6b__chr11	0.123887	0.147981	1.19448	0.116516
Zfp710__chr7	0.11895	0.142076	1.19442	0.112144
Btc__chr5	0.077472	0.0925227	1.19427	0.0745438
Kdm2a__chr19	0.124918	0.149181	1.19422	0.117427
Sf3b1__chr1	0.262155	0.31298	1.19388	0.230607
Eltd1__chr3	0.128225	0.153079	1.19383	0.120341
Zfp12__chr5	0.081556	0.0973557	1.19373	0.0783155
Kcnma1__chr14	0.0745679	0.0890102	1.19368	0.0718523
Lyl1__chr8	0.0842894	0.100575	1.19321	0.0808314
Acmsd__chr1	0.0763262	0.0910628	1.19307	0.0734828
Ttll3__chr6	0.0782316	0.0933304	1.193	0.0752464
Cd274__chr19	0.0835579	0.0996709	1.19284	0.0801587
Gm20187__chr12	0.0748438	0.0892702	1.19275	0.0721084
Mrgpre__chr7	0.0774665	0.0923738	1.19244	0.0745386
Fbxw22__chr9	0.0742769	0.0885622	1.19232	0.0715822
Tmem44__chr16	0.0808995	0.0964515	1.19224	0.0777102
Foxk2__chr11	0.0962738	0.114772	1.19214	0.091781
Nwd1__chr8	0.0752381	0.0896911	1.1921	0.0724741
Prr5l__chr2	0.0828284	0.0987317	1.192	0.0794875
Sorcs3__chr19	0.0748351	0.0891958	1.1919	0.0721003
Fbxo31__chr8	0.0897818	0.107006	1.19185	0.0858658
Xist__chrX	0.0742976	0.0885393	1.19168	0.0716014
Cyp4b1__chr4	0.0947269	0.112858	1.1914	0.0903751
Zfp955a__chr17	0.0791792	0.0943126	1.19113	0.0761223
Pde5a__chr3	0.0834717	0.0994201	1.19106	0.0800794
8430431K14Rik__chr19	0.07553	0.0899596	1.19105	0.0727448
9530091C08Rik__chr9	0.0815212	0.0970818	1.19088	0.0782834
Olfr536__chr7	0.0758507	0.0902518	1.18986	0.0730421
Nlrc4__chr17	0.0766719	0.0912234	1.18979	0.073803
Foxred1__chr9	0.0987066	0.1174	1.18938	0.0939879
Gimap6__chr6	0.112535	0.133827	1.18921	0.10643
Hmgn5__chrX	0.101146	0.12028	1.18916	0.0961956
Arhgef15__chr11	0.108677	0.129224	1.18906	0.102976
Tnf__chr17	0.09963	0.118462	1.18902	0.094824
Exph5__chr9	0.0743744	0.0884284	1.18896	0.0716727
Adrbk1__chr19	0.153588	0.182592	1.18884	0.142371
Ddx60__chr8	0.0808154	0.0960619	1.18866	0.0776327
Lfng__chr5	0.0967135	0.114932	1.18837	0.0921802
Trim36__chr18	0.0763478	0.0906987	1.18797	0.0735028
Pde8a__chr7	0.0767711	0.0911987	1.18793	0.0738949
1700048O20Rik__chr9	0.0755913	0.0897826	1.18774	0.0728017
Eps15l1__chr8	0.0969174	0.115107	1.18768	0.0923654
Cep76__chr18	0.0822624	0.0977011	1.18768	0.0789663
3632454L22Rik__chrX	0.075032	0.0890992	1.18748	0.0722829
Zbed4__chr15	0.0811371	0.0963392	1.18736	0.0779294
Gdpd2__chrX	0.0743811	0.0883062	1.18721	0.0716789
Skp2__chr15	0.0817857	0.0970887	1.18711	0.0785271
Nufip1__chr14	0.0854586	0.101436	1.18696	0.0819053
Gm10653__chr9	0.084949	0.100828	1.18693	0.0814374
Adh1__chr3	0.0813349	0.096531	1.18683	0.0781117
Rnf38__chr4	0.0966514	0.114699	1.18673	0.0921239
Ptpre__chr7	0.123591	0.146625	1.18637	0.116255
Mei4__chr9	0.0779335	0.092402	1.18565	0.0749707
Ythdc1__chr5	0.118996	0.141076	1.18556	0.112184
Ermn__chr2	0.0748266	0.088709	1.18553	0.0720924
Katnal1__chr5	0.0890721	0.105546	1.18495	0.0852168
Mbd4__chr6	0.0794433	0.0941122	1.18465	0.0763663
Npy1r__chr8	0.0771206	0.0913466	1.18446	0.0742185
Crebbp__chr16	0.112228	0.132872	1.18395	0.106155
9430076C15Rik__chr6	0.0802268	0.0949759	1.18384	0.0770897
Ldlrad2__chr4	0.0757818	0.0897018	1.18369	0.0729783
Apobr__chr7	0.0972982	0.11517	1.18368	0.0927109
Tyw1__chr5	0.0854275	0.101102	1.18348	0.0818768
D830026I12Rik__chr6	0.0786577	0.0930896	1.18348	0.0756404
8430410A17Rik__chr6	0.0838624	0.0992308	1.18326	0.0804388
Wars2__chr3	0.0815444	0.0964691	1.18303	0.0783048
A330021E22Rik__chr5	0.075422	0.0892137	1.18286	0.0726447
2900052N01Rik__chr9	0.0745377	0.088128	1.18233	0.0718243
Ccdc71__chr9	0.0818398	0.0967561	1.18226	0.078577
Slc9a3r2__chr17	0.160604	0.189866	1.1822	0.148367
Hspa1a__chr17	0.0986392	0.116602	1.18211	0.0939267
Mta3__chr17	0.0946697	0.111897	1.18197	0.090323
4930529M08Rik__chr2	0.0752948	0.0889857	1.18183	0.0725267
Mll2__chr15	0.112156	0.132547	1.18181	0.106092
Mtfmt__chr9	0.0848512	0.100258	1.18157	0.0813476
Hmgcr__chr13	0.0911351	0.107647	1.18119	0.087102
Gucy2f__chrX	0.0743271	0.0877899	1.18113	0.0716288
Chd8__chr14	0.114496	0.135221	1.18101	0.10818
Ccdc41__chr10	0.102451	0.120975	1.1808	0.097374
Cyb5r4__chr9	0.120024	0.141699	1.18059	0.113097
Dock5__chr14	0.0891454	0.105235	1.18048	0.0852839
A730018C14Rik__chr12	0.0742769	0.0876771	1.18041	0.0715822
BC064078__chr6	0.078957	0.093199	1.18038	0.075917
Pde4c__chr8	0.0766622	0.0904833	1.18029	0.073794
Trim30a__chr7	0.117932	0.139193	1.18028	0.111239
Ceacam12__chr7	0.0749733	0.0884795	1.18015	0.0722285
Zfp825__chr13	0.0897627	0.10589	1.17966	0.0858484
F630042J09Rik__chr13	0.0763689	0.0900858	1.17961	0.0735223
9130019O22Rik__chr7	0.0761332	0.0898009	1.17952	0.0733039
Hmbox1__chr14	0.0765806	0.0903053	1.17922	0.0737185
Cdc26__chr4	0.0870526	0.102637	1.17902	0.0833676
9630028B13Rik__chr1	0.0756458	0.0891871	1.17901	0.0728522
Ypel3__chr7	0.153708	0.18122	1.17899	0.142474
Csnk1g1__chr9	0.0887683	0.104657	1.17899	0.0849389
Stard3__chr11	0.111583	0.131494	1.17845	0.105579
Zfp874b__chr13	0.0793614	0.0935226	1.17844	0.0762906
Sla__chr15	0.111772	0.131713	1.17841	0.105748
Usp3__chr9	0.0840851	0.0990827	1.17836	0.0806435
Cd97__chr8	0.142483	0.167867	1.17816	0.132793
Dach1__chr14	0.0833181	0.098153	1.17805	0.0799381
Arglu1__chr8	0.145254	0.171096	1.17791	0.135194
Phlpp2__chr8	0.078655	0.0926465	1.17788	0.0756379
Rassf1__chr9	0.118944	0.140101	1.17787	0.112139
Rassf5__chr1	0.0946709	0.11151	1.17787	0.0903241
Id1__chr2	0.139153	0.163901	1.17785	0.129901
Clec4n__chr6	0.145535	0.171384	1.17761	0.135437
Camkk1__chr11	0.0795057	0.0935988	1.17726	0.0764239
N4bp1__chr8	0.121504	0.14304	1.17725	0.114408
AI182371__chr2	0.075656	0.0890634	1.17721	0.0728617
Zfp9__chr6	0.0827417	0.0973945	1.17709	0.0794077
Chat__chr14	0.0754701	0.0888341	1.17708	0.0726893
Car5a__chr8	0.0774772	0.0911747	1.17679	0.0745485
Cdh5__chr8	0.159709	0.187939	1.17676	0.147604
Arid1b__chr17	0.115842	0.136305	1.17665	0.10938
1100001G20Rik__chr11	0.0823412	0.096885	1.17663	0.0790389
Snhg7__chr2	0.0813359	0.0956998	1.1766	0.0781127
Tnfrsf26__chr7	0.0827764	0.0973868	1.17651	0.0794396
Cdnf__chr2	0.0839767	0.0987919	1.17642	0.0805438
H2-T24__chr17	0.0779869	0.0917328	1.17626	0.0750201
Rgs17__chr10	0.0768449	0.0903847	1.1762	0.0739632
Clca2__chr3	0.0752134	0.088464	1.17617	0.0724513
Psip1__chr4	0.0988706	0.116253	1.17581	0.0941364
Slc35a5__chr16	0.0918533	0.107965	1.1754	0.0877575
9330159M07Rik__chr9	0.0773944	0.0909559	1.17523	0.0744719
Zfp189__chr4	0.0757064	0.0889429	1.17484	0.0729083
BC039771__chr2	0.0769979	0.0904524	1.17474	0.0741049
Gm4922__chr10	0.0746172	0.0876439	1.17458	0.071898
Alox8__chr11	0.0760898	0.0893261	1.17396	0.0732638
Sh2d3c__chr2	0.107323	0.125967	1.17372	0.101761
C1qtnf9__chr14	0.106339	0.124811	1.17371	0.100877
Krr1__chr10	0.0935349	0.109749	1.17335	0.0892901
9130008F23Rik__chr17	0.0760399	0.0891958	1.17301	0.0732175
Igsf6__chr7	0.112859	0.132357	1.17276	0.10672
Mbtd1__chr11	0.0964866	0.113149	1.1727	0.0919743
Shroom2__chrX	0.0777075	0.0911255	1.17267	0.0747617
Cln3__chr7	0.108292	0.12699	1.17266	0.102631
Pmaip1__chr18	0.0886762	0.10396	1.17235	0.0848546
2610524H06Rik__chr5	0.0868323	0.101791	1.17227	0.0831657
Ccdc77__chr6	0.0809644	0.0949021	1.17215	0.0777701
Synj1__chr16	0.113899	0.133486	1.17197	0.107648
Pim1__chr17	0.179413	0.210264	1.17195	0.164236
Ikbkap__chr4	0.0929049	0.108872	1.17186	0.0887163
Mc3r__chr2	0.0744535	0.0872453	1.17181	0.0717461
Rasip1__chr7	0.141994	0.166385	1.17178	0.13237
BC016579__chr16	0.0743075	0.0870675	1.17172	0.0716106
Stxbp6__chr12	0.0803431	0.0941301	1.1716	0.0771969
Gpsm3__chr17	0.125802	0.14735	1.17129	0.118206
Mak__chr13	0.0743598	0.0870675	1.17089	0.0716592
Taok3__chr5	0.120383	0.140894	1.17038	0.113415
Gucy1a2__chr9	0.0811287	0.0949437	1.17029	0.0779216
Pik3c2b__chr1	0.0832093	0.0973631	1.1701	0.0798381
A330023F24Rik__chr1	0.0787434	0.0920992	1.16961	0.0757196
Kif1a__chr1	0.0761235	0.0890286	1.16953	0.0732949
Rgs7bp__chr13	0.0792228	0.0926485	1.16947	0.0761626
Mb21d1__chr9	0.0882702	0.103201	1.16915	0.084483
Tacstd2__chr6	0.0747231	0.087352	1.16901	0.0719963
Gm7337__chr5	0.0757324	0.0885239	1.1689	0.0729324
Nin__chr12	0.111567	0.13041	1.16889	0.105565
Dap3__chr3	0.114292	0.133523	1.16826	0.107999
Clmn__chr12	0.0799225	0.0933643	1.16819	0.0768088
Hspbap1__chr16	0.0823543	0.0961948	1.16806	0.079051
Gdap10__chr12	0.0795821	0.0929544	1.16803	0.0764944
Ovgp1__chr3	0.0760163	0.0887833	1.16795	0.0731956
Cpeb2__chr5	0.119137	0.139044	1.1671	0.11231
Ctse__chr1	0.0749875	0.0875163	1.16708	0.0722416
Paxbp1__chr16	0.104766	0.122259	1.16697	0.0994614
Zyg11b__chr4	0.116814	0.136295	1.16677	0.110245
Hmgb1-rs17__chr8	0.0760898	0.0887632	1.16656	0.0732637
C8a__chr4	0.0747169	0.0871516	1.16643	0.0719905
Nlrp3__chr11	0.0960937	0.112073	1.16629	0.0916174
Klrb1f__chr6	0.0742871	0.0866294	1.16614	0.0715917
Dqx1__chr6	0.0764226	0.0891188	1.16613	0.0735721
Nol11__chr11	0.0947645	0.110497	1.16602	0.0904092
Zfp472__chr17	0.0781526	0.0911057	1.16574	0.0751734
Dock9__chr14	0.0922727	0.107559	1.16566	0.08814
Gigyf1__chr5	0.110086	0.128317	1.16561	0.104239
Siglech__chr7	0.0770677	0.0898281	1.16557	0.0741695
Tex15__chr8	0.0745551	0.0868818	1.16534	0.0718405
Fut9__chr4	0.0746961	0.0870335	1.16517	0.0719713
Csf2ra__chr19	0.206761	0.240894	1.16508	0.186783
Pla2g7__chr17	0.167563	0.195206	1.16497	0.154273
2500004C02Rik__chr2	0.0793018	0.0923819	1.16494	0.0762355
Gimap9__chr6	0.0778765	0.0907057	1.16474	0.074918
Cwc25__chr11	0.0937301	0.109164	1.16467	0.0894679
Kif14__chr1	0.0797986	0.0929255	1.1645	0.0766943
P2ry13__chr3	0.0851342	0.0991191	1.16427	0.0816075
Rfx1__chr8	0.0907292	0.105626	1.16419	0.0867314
Pola2__chr19	0.0859065	0.100009	1.16417	0.0823164
Gabbr1__chr17	0.0804477	0.0936477	1.16408	0.0772935
B230219D22Rik__chr13	0.133056	0.154858	1.16386	0.12458
Lepr__chr4	0.0803534	0.093512	1.16376	0.0772064
Mageb18__chrX	0.0750417	0.0873238	1.16367	0.072292
5430405H02Rik__chr2	0.0757486	0.0881383	1.16356	0.0729475
Slc12a6__chr2	0.103518	0.120439	1.16346	0.0983365
5830428M24Rik__chr12	0.075169	0.0874483	1.16336	0.07241
Dzank1__chr2	0.0758891	0.0882794	1.16327	0.0730778
Zfand5__chr19	0.191521	0.222728	1.16294	0.174294
Fam53b__chr7	0.0948155	0.110253	1.16282	0.0904556
Rnf44__chr13	0.110771	0.128799	1.16274	0.104853
Trib1__chr15	0.147464	0.171409	1.16238	0.137102
Fosl2__chr5	0.157979	0.18354	1.1618	0.146128
Klhl28__chr12	0.0781564	0.0907932	1.16169	0.0751769
Zfp518a__chr19	0.0836	0.0971027	1.16152	0.0801974
Mapk15__chr15	0.0743315	0.0863255	1.16136	0.0716329
Rbm25__chr12	0.261141	0.30327	1.16133	0.229827
Spata13__chr14	0.090319	0.104881	1.16123	0.0863567
Fabp12__chr3	0.0750269	0.0871186	1.16117	0.0722782
Rmi2__chr16	0.0827177	0.0960389	1.16104	0.0793856
Rbm26__chr14	0.100721	0.116916	1.1608	0.0958106
Dhx40__chr11	0.0965155	0.112002	1.16045	0.0920005
Fam167a__chr14	0.076445	0.0887109	1.16045	0.0735929
Sfrs18__chr4	0.15277	0.177282	1.16045	0.141669
Ccdc14__chr16	0.0770877	0.0894506	1.16037	0.074188
Tiparp__chr3	0.106032	0.123035	1.16035	0.100601
Arsg__chr11	0.0802334	0.0930811	1.16013	0.0770957
Bend7__chr2	0.0764066	0.0886346	1.16004	0.0735573
Ptchd1__chrX	0.0821372	0.0952589	1.15975	0.078851
Bcl2l2__chr14	0.0879441	0.101989	1.1597	0.0841844
Olfr1443__chr19	0.0764106	0.088608	1.15963	0.073561
Gemin5__chr11	0.0845249	0.0980165	1.15962	0.0810477
Acvr2a__chr2	0.082833	0.0960459	1.15951	0.0794917
Stk38__chr17	0.127299	0.147592	1.15942	0.119525
Gpc6__chr14	0.105492	0.122297	1.1593	0.100114
Mtf1__chr4	0.0935217	0.108419	1.1593	0.0892781
Edil3__chr13	0.0746266	0.0865141	1.15929	0.0719068
Ralgapa2__chr2	0.0951225	0.110259	1.15913	0.0907348
Il22ra1__chr4	0.0751472	0.0870766	1.15875	0.0723898
Rbck1__chr2	0.110404	0.12792	1.15866	0.104524
Yme1l1__chr2	0.119756	0.138753	1.15863	0.112859
C130036L24Rik__chr1	0.0759652	0.0879637	1.15795	0.0731483
Slc34a2__chr5	0.0752474	0.0871068	1.15761	0.0724828
Klf6__chr13	0.341941	0.395768	1.15741	0.289613
Ago4__chr4	0.0818216	0.0946769	1.15711	0.0785603
Ptar1__chr19	0.0761239	0.0880747	1.15699	0.0732954
Hjurp__chr1	0.0841461	0.0973529	1.15695	0.0806996
Slc15a1__chr14	0.0746892	0.0864101	1.15693	0.0719649
AU041133__chr10	0.075828	0.0877146	1.15676	0.0730211
Etohi1__chr2	0.0759442	0.0878371	1.1566	0.0731288
Psmd9__chr5	0.0897027	0.103727	1.15634	0.0857935
Trib2__chr12	0.0898093	0.103832	1.15614	0.085891
Znrf2__chr6	0.0908093	0.104947	1.15569	0.0868046
Vamp5__chr6	0.105595	0.122031	1.15565	0.100207
Nkapl__chr13	0.0765495	0.0884626	1.15563	0.0736897
Plekhf2__chr4	0.0964117	0.111407	1.15553	0.0919063
Itga1__chr13	0.0931504	0.107637	1.15552	0.0889399
7420700N18Rik__chr8	0.074676	0.0862827	1.15543	0.0719526
Cbx7__chr15	0.0804203	0.0929152	1.15537	0.0772682
Gm1966__chr7	0.0906973	0.104787	1.15534	0.0867023
Elovl7__chr13	0.0779394	0.0900293	1.15512	0.0749762
Gm6634__chr3	0.0755696	0.0872762	1.15491	0.0727815
Asb13__chr13	0.080143	0.0925495	1.1548	0.0770123
6030408B16Rik__chr15	0.0882723	0.101935	1.15478	0.0844849
B4galt3__chr1	0.0868497	0.100277	1.15461	0.0831816
Adra2b__chr2	0.0745789	0.0860942	1.1544	0.0718625
Zbtb8b__chr4	0.0769947	0.088869	1.15422	0.0741019
Zfp612__chr8	0.0767976	0.0886362	1.15415	0.0739194
Gm4262__chr16	0.0780777	0.0901076	1.15408	0.0751041
Prss35__chr9	0.0753922	0.0870076	1.15407	0.072617
Arl5b__chr2	0.0801616	0.0925059	1.15399	0.0770294
Eno2__chr6	0.0764836	0.0882271	1.15354	0.0736286
Evi2b__chr11	0.121701	0.140376	1.15345	0.114583
Napsa__chr7	0.0884503	0.101988	1.15305	0.0846478
Pts__chr9	0.0912501	0.105211	1.153	0.087207
C87198__chr12	0.0743203	0.0856886	1.15296	0.0716225
Tspan13__chr12	0.163266	0.188221	1.15285	0.150631
A630075F10Rik__chr2	0.0766204	0.0882849	1.15224	0.0737553
Gab3__chrX	0.0831033	0.0957537	1.15223	0.0797405
St7l__chr3	0.0825018	0.0950348	1.15191	0.0791868
4930433N12Rik__chr9	0.0747592	0.0860894	1.15156	0.0720298
Hsd17b13__chr5	0.0750031	0.0863649	1.15148	0.0722561
Nmrk1__chr19	0.0909256	0.104663	1.15108	0.0869108
Kcna4__chr2	0.0748473	0.0861544	1.15107	0.0721115
Gbp7__chr3	0.109541	0.126086	1.15104	0.103751
Gm14461__chr2	0.0746235	0.0858894	1.15097	0.0719039
Smarca5-ps__chr4	0.076158	0.0876405	1.15077	0.0733269
Timp4__chr6	0.0967714	0.111346	1.15061	0.0922328
1600002H07Rik__chr17	0.0789632	0.0908543	1.15059	0.0759227
Gm2027__chr12	0.0747555	0.0859985	1.1504	0.0720264
Mboat4__chr8	0.075687	0.0870609	1.15027	0.0728904
Plcb2__chr2	0.07911	0.0909872	1.15013	0.0760584
Lingo2__chr4	0.074466	0.0856398	1.15005	0.0717577
Gcnt2__chr13	0.103203	0.118673	1.14989	0.0980528
Gm5934__chrX	0.0749353	0.0861612	1.14981	0.0721932
Fam129a__chr1	0.0888302	0.102135	1.14978	0.0849955
Fnd3c2__chrX	0.0742769	0.0853997	1.14975	0.0715822
Srd5a3__chr5	0.0973493	0.111925	1.14972	0.0927573
Nkd1__chr8	0.078018	0.0896856	1.14955	0.0750489
Pak3__chrX	0.0758413	0.087172	1.1494	0.0730334
B230209E15Rik__chr7	0.0748694	0.0860546	1.1494	0.072132
Zfp281__chr1	0.109119	0.125407	1.14928	0.103372
G730013B05Rik__chr16	0.0746421	0.0857834	1.14926	0.0719211
Obox3__chr7	0.0747256	0.0858754	1.14921	0.0719987
Agfg2__chr5	0.0840445	0.0965772	1.14912	0.0806062
Noxred1__chr12	0.0748104	0.0859577	1.14901	0.0720773
1700025N23Rik__chr6	0.0763075	0.0876777	1.149	0.0734654
Nfe2l2__chr2	0.183466	0.210795	1.14896	0.167617
Zfp345__chr2	0.0747144	0.0858403	1.14891	0.0719882
Hmgxb3__chr18	0.0849346	0.0975647	1.1487	0.0814242
P2ry4__chrX	0.0748044	0.0859153	1.14853	0.0720718
Zbtb42__chr12	0.0813525	0.0934309	1.14847	0.0781279
Naip5__chr13	0.0857633	0.0984503	1.14793	0.082185
Lrrc19__chr4	0.0744754	0.085485	1.14783	0.0717664
Tjp1__chr7	0.0984541	0.113002	1.14776	0.093759
Rictor__chr15	0.0870238	0.0998672	1.14758	0.0833412
Jak2__chr19	0.107102	0.122903	1.14753	0.101562
Atp10b__chr11	0.0747029	0.0857015	1.14723	0.0719776
Ly6c2__chr15	0.0796763	0.0914006	1.14715	0.0765814
Ciita__chr16	0.0772234	0.0885668	1.14689	0.0743136
Scn3b__chr9	0.0749181	0.0858905	1.14646	0.0721773
Gm19299__chr9	0.0747757	0.0857137	1.14628	0.0720451
Cmip__chr8	0.24204	0.277441	1.14626	0.214973
Tet1__chr10	0.0775512	0.0888843	1.14614	0.074617
Prmt6__chr3	0.0809848	0.0928168	1.1461	0.0777889
Prex1__chr2	0.0959546	0.109955	1.1459	0.0914911
Cyp2d22__chr15	0.0904104	0.103594	1.14581	0.0864403
Lancl2__chr6	0.0815063	0.0933842	1.14573	0.0782697
Hs3st4__chr7	0.0766282	0.0877901	1.14566	0.0737626
Hist1h1c__chr13	0.118174	0.135378	1.14558	0.111455
Mtrf1__chr14	0.0808502	0.0926194	1.14557	0.0776648
Oxsr1__chr9	0.103112	0.118081	1.14517	0.0979699
Emx2os__chr19	0.0788958	0.0903417	1.14508	0.0758604
Ngrn__chr7	0.0834523	0.095552	1.14499	0.0800616
Fam124a__chr14	0.0819869	0.0938621	1.14484	0.0787126
Dnahc2__chr11	0.0752608	0.0861496	1.14468	0.0724952
Abhd15__chr11	0.0783886	0.0897263	1.14463	0.0753916
Gm16497__chr12	0.0742769	0.0850127	1.14454	0.0715822
Pate4__chr9	0.0742769	0.0850062	1.14445	0.0715822
Lyrm9__chr11	0.0863055	0.0987616	1.14433	0.0826826
Kif3b__chr2	0.0872415	0.0998322	1.14432	0.0835407
Cry1__chr10	0.0803543	0.091949	1.14429	0.0772073
Taf4a__chr2	0.0889153	0.101731	1.14413	0.0850734
Adam19__chr11	0.104672	0.119735	1.1439	0.0993766
Sumf1__chr6	0.113002	0.129254	1.14383	0.106847
Gm3414__chr5	0.078276	0.0895298	1.14377	0.0752875
Cd44__chr2	0.314037	0.359154	1.14367	0.269509
Dmxl2__chr9	0.102175	0.116849	1.14362	0.0971243
Sema6a__chr18	0.0973083	0.111237	1.14314	0.0927201
Zfyve27__chr19	0.0872057	0.099684	1.14309	0.0835079
Ubxn2a__chr12	0.098653	0.112755	1.14295	0.0939392
Plekhg1__chr10	0.0825818	0.0943722	1.14277	0.0792604
2810408M09Rik__chr2	0.0855373	0.0977254	1.14249	0.0819776
Zfp616__chr11	0.0742971	0.0848569	1.14213	0.0716009
Usp29__chr7	0.0764082	0.0872671	1.14212	0.0735588
9430037G07Rik__chr9	0.0762652	0.0871011	1.14208	0.0734263
Sgms1__chr19	0.117277	0.13393	1.142	0.110657
Xcr1__chr9	0.0800514	0.0914168	1.14198	0.0769277
Spata31__chr13	0.0743461	0.0848972	1.14192	0.0716464
Muc13__chr16	0.0742966	0.0848402	1.14191	0.0716005
Mcm8__chr2	0.0774152	0.0883988	1.14188	0.0744912
Lrit2__chr14	0.0744922	0.085049	1.14172	0.0717821
4921513I03Rik__chr10	0.0752292	0.0858867	1.14167	0.0724659
Rad23a__chr8	0.0877188	0.100126	1.14145	0.0839781
Gm16287__chr4	0.075852	0.0865628	1.14121	0.0730433
Lag3__chr6	0.0747934	0.0853513	1.14116	0.0720615
Rab3c__chr13	0.0752439	0.0858521	1.14098	0.0724795
Tnfrsf1b__chr4	0.146287	0.166898	1.1409	0.136086
Gm20337__chr12	0.0768383	0.0876636	1.14088	0.0739572
Fubp1__chr3	0.134137	0.153024	1.14081	0.125526
Psg25__chr7	0.0750529	0.0856166	1.14075	0.0723023
Alox12__chr11	0.08116	0.0925668	1.14055	0.0779505
D14Abb1e__chr14	0.0975317	0.111236	1.14051	0.0929228
Slc24a2__chr4	0.0747248	0.0852201	1.14045	0.0719979
Olfr578__chr7	0.0742769	0.0847028	1.14036	0.0715822
Ube2l6__chr2	0.103714	0.118265	1.14029	0.0985134
Suv420h2__chr7	0.0893143	0.101819	1.14	0.0854384
Sema5a__chr15	0.0826262	0.0941925	1.13998	0.0793013
Tfcp2l1__chr1	0.0744208	0.0848335	1.13992	0.0717157
Fhl3__chr4	0.0850998	0.0970067	1.13992	0.0815759
Stx17__chr4	0.0920397	0.104911	1.13985	0.0879275
2810013P06Rik__chr8	0.0854772	0.0974242	1.13977	0.0819225
Galnt15__chr14	0.0767643	0.0874892	1.13971	0.0738886
Fam65a__chr8	0.134361	0.153111	1.13954	0.125722
Mau2__chr8	0.0918648	0.104675	1.13944	0.0877679
E230029C05Rik__chr7	0.0818708	0.0932862	1.13943	0.0786056
2810429I04Rik__chr13	0.0748123	0.0852338	1.1393	0.0720791
Selplg__chr5	0.151333	0.172363	1.13896	0.140435
Efcab4a__chr7	0.0905051	0.103076	1.13889	0.0865268
Fam163b__chr2	0.0749458	0.0853499	1.13882	0.072203
Usp35__chr7	0.0761749	0.086736	1.13864	0.0733426
Arid3a__chr10	0.0912622	0.103914	1.13863	0.0872181
Kitl__chr10	0.144414	0.164431	1.13861	0.134467
Tyrobp__chr7	0.404692	0.460726	1.13846	0.332825
2410137F16Rik__chr5	0.0742769	0.0845556	1.13838	0.0715822
Nr1i2__chr16	0.0742769	0.0845556	1.13838	0.0715822
Pate2__chr9	0.0742769	0.0845556	1.13838	0.0715822
Wfdc9__chr2	0.0742769	0.0845556	1.13838	0.0715822
Pithd1__chr4	0.0855317	0.0973634	1.13833	0.0819725
Casp8ap2__chr4	0.0907943	0.103349	1.13828	0.0867909
Vezf1__chr11	0.110162	0.125395	1.13827	0.104308
Reep3__chr10	0.18844	0.214496	1.13827	0.171746
Spg7__chr8	0.109232	0.124335	1.13827	0.103474
Krtap20-2__chr16	0.0758558	0.0863407	1.13822	0.0730468
Preb__chr5	0.114664	0.130506	1.13816	0.108331
Gm7102__chr19	0.0766543	0.0872407	1.13811	0.0737867
Wasf3__chr5	0.0743399	0.0845556	1.13742	0.0716406
Acsm5__chr7	0.0743472	0.0845556	1.13731	0.0716474
Nfx1__chr4	0.0861825	0.0979957	1.13707	0.0825697
Rbm39__chr2	0.222703	0.253221	1.13703	0.199645
Cdc5l__chr17	0.129314	0.147029	1.13699	0.121298
Zfp780b__chr7	0.0831055	0.0944819	1.13689	0.0797425
Slc17a8__chr10	0.0761286	0.0865474	1.13686	0.0732997
Rgl2__chr17	0.130601	0.148472	1.13683	0.122429
Klri2__chr6	0.0745588	0.0847583	1.1368	0.0718438
Nlrp1b__chr11	0.0762728	0.0867052	1.13678	0.0734333
Prelid2__chr18	0.0793728	0.0902246	1.13672	0.0763012
Nipsnap3b__chr4	0.0985	0.111947	1.13651	0.0938006
Guf1__chr5	0.08708	0.0989522	1.13634	0.0833927
Fhod1__chr8	0.0998535	0.113453	1.13619	0.0950263
C030034L19Rik__chr3	0.0764377	0.0868403	1.13609	0.0735861
Itpripl1__chr2	0.0908915	0.103254	1.13601	0.0868796
9230112J17Rik__chr9	0.0755576	0.0858261	1.1359	0.0727704
Bst1__chr5	0.101172	0.114917	1.13586	0.0962188
Mtf2__chr5	0.0996441	0.113176	1.1358	0.0948368
Gm4890__chr8	0.075712	0.0859801	1.13562	0.0729136
D830030K20Rik__chr14	0.0750135	0.0851671	1.13536	0.0722658
Tnfrsf17__chr16	0.0744783	0.0845556	1.1353	0.0717691
Klra3__chr6	0.0743246	0.084376	1.13524	0.0716265
Gpatch11__chr17	0.0850895	0.0965868	1.13512	0.0815665
Ddx11__chr17	0.0781487	0.0887014	1.13503	0.0751698
Gm13315__chr2	0.0752583	0.0854187	1.13501	0.0724929
Gm10791__chr16	0.0771772	0.0875915	1.13494	0.0742709
Kcne4__chr1	0.0830025	0.094198	1.13488	0.0796478
Abca7__chr10	0.0914442	0.103775	1.13484	0.0873842
Ccl28__chr13	0.0747129	0.0847745	1.13467	0.0719869
Btbd19__chr4	0.0837181	0.0949868	1.1346	0.080306
Fam49b__chr15	0.186756	0.21187	1.13448	0.17035
Tspan2__chr3	0.0850693	0.0965079	1.13446	0.0815479
2900005J15Rik__chr5	0.0752968	0.0854183	1.13442	0.0725285
Gm805__chr12	0.0750508	0.0851378	1.1344	0.0723004
Cldn5__chr16	0.109616	0.124345	1.13437	0.103818
Map3k8__chr18	0.0848178	0.0962015	1.13421	0.0813169
Itsn2__chr12	0.100573	0.114064	1.13414	0.0956774
2410002F23Rik__chr7	0.0963084	0.10922	1.13407	0.0918124
9630001P10Rik__chr5	0.0747136	0.0847196	1.13392	0.0719875
Mcidas__chr13	0.0743252	0.0842759	1.13388	0.071627
Pou2f2__chr7	0.0949033	0.1076	1.13378	0.0905355
BC033916__chr17	0.0749546	0.0849743	1.13368	0.0722112
Tyr__chr7	0.0754564	0.0855381	1.13361	0.0726766
Zfp36l2__chr17	0.171843	0.194753	1.13332	0.157885
Gabrg1__chr5	0.0743648	0.0842743	1.13326	0.0716638
Cecr2__chr6	0.0791753	0.0897256	1.13325	0.0761187
Htr2a__chr14	0.0745208	0.0844473	1.1332	0.0718086
Suz12__chr11	0.111626	0.126484	1.1331	0.105618
Slc26a11__chr11	0.0841097	0.0953044	1.1331	0.0806661
A230072E10Rik__chrX	0.0749527	0.0849159	1.13293	0.0722094
Clec14a__chr12	0.0922189	0.104468	1.13283	0.0880909
Adh6-ps1__chr3	0.075259	0.0852529	1.13279	0.0724935
Itpr2__chr6	0.108293	0.122672	1.13277	0.102632
Klf13__chr7	0.180728	0.204707	1.13268	0.165334
Rcor3__chr1	0.0816123	0.0924391	1.13266	0.0783674
Isg20__chr7	0.0892244	0.101041	1.13244	0.0853561
Car4__chr11	0.0969907	0.109833	1.13241	0.0924319
1700030C10Rik__chr12	0.0795378	0.0900606	1.1323	0.0764536
Zfp263__chr16	0.100166	0.113417	1.13228	0.0953094
Gm20757__chr10	0.0747647	0.0846518	1.13224	0.072035
Prss30__chr17	0.075407	0.085372	1.13215	0.0726308
4933408N05Rik__chr8	0.0791723	0.089633	1.13212	0.076116
Zcchc6__chr13	0.0857408	0.0970611	1.13203	0.0821644
Marf1__chr16	0.0844334	0.095579	1.132	0.0809637
Col6a6__chr9	0.0743528	0.0841639	1.13195	0.0716526
Smad5__chr13	0.0961589	0.10884	1.13188	0.0916766
Gfod1__chr13	0.0809062	0.0915745	1.13186	0.0777164
Syk__chr13	0.128088	0.144968	1.13178	0.120221
Cd300lg__chr11	0.181445	0.205349	1.13174	0.165933
Plxnb1__chr9	0.0839814	0.0950419	1.1317	0.0805482
Prnd__chr2	0.0929647	0.105205	1.13167	0.0887708
Pkn2__chr3	0.112065	0.126816	1.13162	0.10601
Skint3__chr4	0.0768865	0.0870054	1.13161	0.0740017
Eef2k__chr7	0.0884597	0.100098	1.13157	0.0846565
Fes__chr7	0.130024	0.147123	1.1315	0.121922
Lrrc41__chr4	0.0963169	0.108983	1.1315	0.0918202
Zmat1__chrX	0.0797704	0.0902602	1.1315	0.0766684
B230217C12Rik__chr11	0.0754482	0.0853675	1.13147	0.072669
Proser2__chr2	0.0747392	0.0845556	1.13134	0.0720113
Clk1__chr1	0.135478	0.153258	1.13124	0.126697
Lin7c__chr2	0.101061	0.114325	1.13124	0.0961188
Fxn__chr19	0.0854233	0.0966295	1.13118	0.0818729
Pnpla7__chr2	0.0930509	0.105247	1.13107	0.0888492
Gm2a__chr11	0.182251	0.206128	1.13101	0.166604
Hspa14__chr2	0.0960682	0.108643	1.1309	0.0915943
Tra2a__chr6	0.104193	0.117807	1.13066	0.0989449
D930032P07Rik__chr19	0.0756521	0.0855358	1.13065	0.0728581
Fign__chr2	0.0820437	0.092744	1.13042	0.0787649
Rnf167__chr11	0.0953047	0.107733	1.1304	0.0909004
Smcr7l__chr15	0.0874993	0.0989026	1.13032	0.083777
Ep300__chr15	0.111077	0.125546	1.13026	0.105126
Glyr1__chr16	0.111769	0.126327	1.13025	0.105745
Smchd1__chr17	0.104024	0.117567	1.13019	0.098793
Cdh16__chr8	0.0761799	0.086097	1.13018	0.0733472
Nupl2__chr5	0.0824608	0.0931428	1.12954	0.0791491
Alox5__chr6	0.0919869	0.103889	1.12939	0.0878793
Efcab5__chr11	0.0743985	0.0840142	1.12925	0.0716951
Rfx3__chr19	0.0762034	0.0860513	1.12923	0.073369
A230070E04Rik__chr14	0.0742769	0.0838718	1.12918	0.0715822
B230216G23Rik__chr6	0.074609	0.084246	1.12917	0.0718905
Smg9__chr7	0.0872762	0.0985438	1.1291	0.0835726
Sfi1__chr11	0.0846189	0.0955376	1.12903	0.0811341
Cttnbp2__chr6	0.0754668	0.085198	1.12895	0.0726863
Msl2__chr9	0.102941	0.116211	1.12891	0.0978159
Dab2ip__chr2	0.114424	0.129173	1.1289	0.108116
Psmd5__chr2	0.0956805	0.107963	1.12837	0.091242
Nphs1__chr7	0.0766241	0.0864548	1.1283	0.0737588
Ttyh3__chr5	0.13591	0.153329	1.12816	0.127075
C030039L03Rik__chr7	0.0779639	0.0879479	1.12806	0.0749989
Med20__chr17	0.0857799	0.0967484	1.12787	0.0822003
Ints6__chr14	0.0825951	0.0931473	1.12776	0.0792727
Snph__chr2	0.074282	0.083769	1.12772	0.0715869
Crispld1__chr1	0.0763304	0.0860763	1.12768	0.0734867
AI413582__chr17	0.0994329	0.112111	1.1275	0.0946456
B020004C17Rik__chr14	0.076301	0.0860208	1.12739	0.0734594
Fxyd5__chr7	0.296984	0.334811	1.12737	0.256945
Pfkfb2__chr1	0.100096	0.112845	1.12737	0.0952453
Elovl2__chr13	0.0743272	0.0837814	1.1272	0.0716289
Jhdm1d__chr6	0.149938	0.168996	1.1271	0.139235
Adam11__chr11	0.0775562	0.0874087	1.12704	0.0746217
A430090L17Rik__chr13	0.0747985	0.0842928	1.12693	0.0720663
Tek__chr4	0.103591	0.116728	1.12682	0.098402
Edem2__chr2	0.0927616	0.104497	1.12651	0.0885856
4930511M11Rik__chr5	0.0751996	0.0847121	1.1265	0.0724384
Vps4b__chr1	0.134016	0.150948	1.12634	0.12542
Dtwd2__chr18	0.0808756	0.0910911	1.12631	0.0776882
Ipw__chr7	0.0743938	0.083769	1.12602	0.0716907
Znf41-ps__chr4	0.078526	0.0884171	1.12596	0.0755187
Pfkfb4__chr9	0.0872088	0.0981616	1.12559	0.0835108
Trim39__chr17	0.0818065	0.0920764	1.12554	0.0785464
Rassf9__chr10	0.0819329	0.0922172	1.12552	0.0786628
Zfp292__chr4	0.103667	0.116672	1.12546	0.0984705
Prdx6b__chr2	0.0743652	0.0836921	1.12542	0.0716641
8430408G22Rik__chr6	0.0859469	0.0967123	1.12526	0.0823535
Fam188b__chr6	0.0763421	0.0858647	1.12474	0.0734975
D7Ertd715e__chr7	0.0782623	0.088023	1.12472	0.0752748
Gm12505__chr4	0.0754979	0.0849112	1.12468	0.072715
Gadd45a__chr6	0.0909758	0.102317	1.12466	0.0869566
A330032B11Rik__chr19	0.0789057	0.0887296	1.1245	0.0758696
2410114N07Rik__chr4	0.074657	0.0839507	1.12448	0.071935
Ulbp1__chr10	0.0747618	0.0840684	1.12448	0.0720322
Lrriq1__chr10	0.0746938	0.0839675	1.12416	0.0719691
Gm16523__chr2	0.0782526	0.0879667	1.12414	0.0752658
Kcnmb1__chr11	0.0768263	0.0863592	1.12408	0.073946
U2af2__chr7	0.24187	0.271881	1.12408	0.21484
Slc27a3__chr3	0.0762787	0.0857339	1.12396	0.0734387
Zfp11__chr5	0.0767924	0.086304	1.12386	0.0739146
Bcl9l__chr9	0.0908381	0.102087	1.12383	0.0868309
Nhsl2__chrX	0.0847011	0.0951876	1.12381	0.0812097
A230057D06Rik__chr7	0.0752608	0.0845714	1.12371	0.0724952
Vmn2r111__chr17	0.0742769	0.0834648	1.1237	0.0715822
Tbc1d15__chr10	0.104839	0.117791	1.12355	0.0995264
Slc17a5__chr9	0.0886537	0.0996044	1.12352	0.084834
Slc25a44__chr3	0.0876945	0.0985181	1.12342	0.0839558
Arl16__chr11	0.0903206	0.101464	1.12337	0.0863582
Rnf40__chr7	0.0962884	0.108166	1.12336	0.0917943
Kifc2__chr15	0.0765953	0.0860269	1.12313	0.0737321
Rbbp6__chr7	0.147021	0.165119	1.1231	0.136721
Pbp2__chr6	0.0746148	0.083799	1.12309	0.0718958
Slfn5__chr11	0.161428	0.181295	1.12307	0.149068
Ubxn2b__chr4	0.0806827	0.0905921	1.12282	0.0775102
Pias1__chr9	0.107581	0.120749	1.1224	0.101992
Cacna1f__chrX	0.0751228	0.0843083	1.12227	0.0723671
Ska3__chr14	0.0791413	0.088816	1.12225	0.0760873
Clcn5__chrX	0.0754648	0.0846893	1.12224	0.0726844
Csnk1e__chr15	0.102625	0.115163	1.12218	0.0975308
Bmp4__chr14	0.0815423	0.0915033	1.12216	0.0783029
1700028E10Rik__chr5	0.0746773	0.083799	1.12215	0.0719539
Pkhd1l1__chr15	0.0757025	0.0849451	1.12209	0.0729048
Oraov1__chr7	0.0823484	0.0923979	1.12204	0.0790456
1700022A22Rik__chr15	0.0745463	0.083636	1.12193	0.0718323
Mast4__chr13	0.111479	0.125053	1.12176	0.105486
Tssk2__chr16	0.0742769	0.0833164	1.1217	0.0715822
Gsg1l__chr7	0.0793381	0.0889908	1.12167	0.0762691
2210010C04Rik__chr6	0.0750098	0.084123	1.12149	0.0722624
Rnf20__chr4	0.109203	0.122425	1.12108	0.103447
Cyp7a1__chr4	0.0754692	0.0846069	1.12108	0.0726885
Rint1__chr5	0.0876702	0.0982818	1.12104	0.0839335
Mllt4__chr17	0.13366	0.149837	1.12103	0.125109
Pus7__chr5	0.0850064	0.09529	1.12097	0.0814901
4930431P03Rik__chr14	0.0749776	0.0840424	1.1209	0.0722325
AW551984__chr9	0.0752492	0.0843402	1.12081	0.0724844
Entpd3__chr9	0.0771122	0.0864274	1.1208	0.0742107
Camta2__chr11	0.111061	0.124473	1.12076	0.105112
1700074P13Rik__chr6	0.0743058	0.0832731	1.12068	0.071609
Atp8b4__chr2	0.0927898	0.103974	1.12053	0.0886113
Vav1__chr17	0.117615	0.131785	1.12048	0.110958
4932415G12Rik__chr10	0.0772512	0.0865528	1.12041	0.0743394
Amer1__chrX	0.0833134	0.0933444	1.1204	0.0799338
Kank4__chr4	0.0748805	0.0838651	1.11998	0.0721424
Bbs1__chr19	0.0773454	0.0866251	1.11998	0.0744266
Wdr77__chr3	0.100925	0.113029	1.11993	0.0959959
Cntnap2__chr6	0.0743402	0.0832522	1.11988	0.0716409
1700123L14Rik__chr6	0.0750009	0.0839919	1.11988	0.0722541
Rnf113a2__chr12	0.0794408	0.0889639	1.11988	0.0763639
AW549877__chr15	0.100678	0.112746	1.11987	0.0957723
Dyx1c1__chr9	0.0744606	0.0833817	1.11981	0.0717527
Zfp429__chr13	0.0774283	0.0866952	1.11968	0.0745033
Sfxn3__chr19	0.114651	0.128363	1.11959	0.108319
Gm10825__chr10	0.0762789	0.0853936	1.11949	0.073439
Pnpla3__chr15	0.0749539	0.083907	1.11945	0.0722105
Rpp40__chr13	0.0820063	0.0917987	1.11941	0.0787304
Pcf11__chr7	0.101188	0.113268	1.11937	0.0962336
Bnip2__chr9	0.160173	0.179293	1.11937	0.148
Dbt__chr3	0.100756	0.112779	1.11933	0.0958429
Camk4__chr18	0.0765134	0.0856338	1.1192	0.0736562
Kctd18__chr1	0.0806502	0.0902611	1.11917	0.0774803
Dusp6__chr10	0.135663	0.151817	1.11908	0.126859
Fam217a__chr13	0.0745046	0.0833763	1.11908	0.0717936
Ddx26b__chrX	0.0894695	0.100118	1.11902	0.0855803
Wdr34__chr2	0.0805575	0.0901426	1.11899	0.0773948
Hnrnph2__chrX	0.13049	0.146003	1.11889	0.12233
Scnn1a__chr6	0.0760267	0.0850509	1.1187	0.0732052
Akap14__chrX	0.0744339	0.0832589	1.11856	0.0717279
Cdkn2aip__chr8	0.0794972	0.0889098	1.1184	0.076416
Plrg1__chr3	0.0986116	0.110287	1.1184	0.0939017
4933434E20Rik__chr3	0.116963	0.130797	1.11828	0.110378
Zfp143__chr7	0.0831682	0.0930005	1.11822	0.0798002
Pbxip1__chr3	0.177758	0.198768	1.1182	0.162851
Mtmr3__chr11	0.0970086	0.10847	1.11815	0.0924481
Pitpnm1__chr19	0.0805005	0.0900009	1.11802	0.0773422
Kcns2__chr15	0.074326	0.0830957	1.11799	0.0716278
She__chr3	0.0913677	0.10212	1.11769	0.0873144
Fam19a1__chr6	0.0742975	0.0830391	1.11766	0.0716013
2310001H17Rik__chr6	0.0794483	0.0887859	1.11753	0.0763709
2810403D21Rik__chrX	0.0763269	0.0852815	1.11732	0.0734834
1700003M07Rik__chr4	0.0748006	0.0835751	1.11731	0.0720682
Ppp4r1l-ps__chr2	0.0770349	0.0860714	1.1173	0.0741391
Gemin8__chrX	0.0770512	0.0860836	1.11723	0.0741542
Gm12185__chr11	0.0750371	0.0838247	1.11711	0.0722877
Pcdhb14__chr18	0.0750691	0.0838545	1.11703	0.0723174
Tlk2__chr11	0.094348	0.105385	1.11698	0.0900303
Cadm2__chr16	0.0752209	0.0840068	1.1168	0.0724582
AI197445__chr13	0.0746517	0.0833679	1.11676	0.07193
Tnfrsf11a__chr1	0.0964603	0.107722	1.11675	0.0919504
Zfp748__chr13	0.0765283	0.0854606	1.11672	0.07367
Ammecr1__chrX	0.0783638	0.0875093	1.11671	0.0753687
Il20rb__chr9	0.0759215	0.0847818	1.1167	0.0731078
Hps3__chr3	0.0908662	0.101465	1.11664	0.0868565
Wbp7__chr7	0.0953981	0.106525	1.11664	0.0909853
Sybu__chr15	0.0809129	0.090348	1.11661	0.0777226
Notch1__chr2	0.128688	0.143677	1.11648	0.120748
Gm19705__chr1	0.0776449	0.0866801	1.11636	0.0747037
Zfp182__chrX	0.0794168	0.0886516	1.11628	0.0763418
AI314278__chr7	0.0755015	0.0842605	1.11601	0.0727184
Cntnap4__chr8	0.0746597	0.0833189	1.11598	0.0719375
Bcl7a__chr5	0.0805492	0.0898901	1.11597	0.0773871
Fam217b__chr2	0.0827276	0.0923113	1.11585	0.0793947
Tnfrsf23__chr7	0.106077	0.118364	1.11583	0.100641
Il1rn__chr2	0.131914	0.147189	1.11579	0.12358
Padi2__chr4	0.079728	0.0889554	1.11574	0.0766291
Treml2__chr17	0.0836126	0.0932839	1.11567	0.080209
Irf9__chr14	0.101222	0.112926	1.11562	0.0962642
Shisa3__chr5	0.0788543	0.0879662	1.11555	0.0758221
Optc__chr1	0.0751775	0.083864	1.11555	0.0724179
Nrxn3__chr12	0.0746054	0.0832256	1.11554	0.0718871
2310039L15Rik__chr10	0.0796821	0.0888839	1.11548	0.0765868
9130221F21Rik__chr6	0.0770707	0.0859691	1.11546	0.0741723
Ttc14__chr3	0.112653	0.125656	1.11543	0.106535
Asap3__chr4	0.0796289	0.0888195	1.11542	0.0765377
Rhbdd2__chr5	0.0900446	0.100426	1.11529	0.086106
2700054A10Rik__chr17	0.0750857	0.0837346	1.11519	0.0723328
Slc9c1__chr16	0.0742769	0.0828315	1.11517	0.0715822
Nlrp1a__chr11	0.0785379	0.0875827	1.11517	0.0755296
Gm20410__chr17	0.0742785	0.0828264	1.11508	0.0715836
Slbp__chr5	0.105046	0.117129	1.11502	0.0997133
Cops7b__chr1	0.0787014	0.087752	1.115	0.0756808
Sgol2__chr1	0.0874669	0.0975148	1.11488	0.0837472
4930578N18Rik__chr16	0.0742769	0.0828079	1.11485	0.0715822
Zfp870__chr17	0.0782692	0.087258	1.11484	0.0752812
Fmo2__chr1	0.0800447	0.0892144	1.11456	0.0769215
1700096K18Rik__chr5	0.0761373	0.0848586	1.11455	0.0733078
D1Ertd622e__chr1	0.0989522	0.110284	1.11452	0.0942103
Frrs1__chr3	0.104576	0.11655	1.11451	0.0992896
4930578E11Rik__chr18	0.0744833	0.0829964	1.1143	0.0717738
BC005561__chr5	0.0935016	0.104187	1.11429	0.0892598
Peli2__chr14	0.0839838	0.0935805	1.11427	0.0805504
Tmc1__chr19	0.0750401	0.0836091	1.11419	0.0722904
Hnf4g__chr3	0.0743376	0.0828259	1.11419	0.0716386
Ube2u__chr4	0.0775281	0.0863751	1.11411	0.0745956
Slc26a3__chr12	0.0742769	0.0827518	1.1141	0.0715822
Uggt2__chr14	0.0777383	0.0866053	1.11406	0.0747902
Tmem154__chr3	0.084458	0.0940858	1.11399	0.0809863
Zc3hav1l__chr6	0.0792236	0.0882494	1.11393	0.0761633
AB124611__chr9	0.128068	0.142652	1.11388	0.120203
Adamts12__chr15	0.075683	0.084301	1.11387	0.0728867
Clec2d__chr6	0.0873934	0.0973448	1.11387	0.08368
Gm8221__chr15	0.0745605	0.0830466	1.11381	0.0718455
Cnr2__chr4	0.0816428	0.0909266	1.11371	0.0783955
Fancm__chr12	0.0773732	0.0861668	1.11365	0.0744523
Ttc5__chr14	0.0873343	0.097253	1.11357	0.0836258
Pirt__chr11	0.0821498	0.0914669	1.11342	0.0788627
Zscan12__chr13	0.0782894	0.0871669	1.11339	0.0752998
Tbrg3__chr15	0.0791884	0.0881643	1.11335	0.0761308
Hyal2__chr9	0.0975013	0.108551	1.11333	0.0928951
Gm17769__chr10	0.0748783	0.083361	1.11329	0.0721403
Bloc1s6__chr2	0.0951983	0.105983	1.11328	0.0908038
Gpatch8__chr11	0.0940736	0.104697	1.11292	0.0897806
Kdm1a__chr4	0.0940841	0.104678	1.1126	0.0897902
Fancb__chrX	0.0784447	0.0872723	1.11253	0.0754435
Fbxo32__chr15	0.104568	0.116324	1.11243	0.0992823
E130309F12Rik__chr4	0.0746298	0.0830111	1.11231	0.0719097
Krt7__chr15	0.0756192	0.0841114	1.1123	0.0728275
Xpa__chr4	0.0854971	0.095096	1.11227	0.0819407
2700099C18Rik__chr17	0.0771143	0.0857719	1.11227	0.0742126
Angpt2__chr8	0.0841585	0.0935876	1.11204	0.080711
F8__chrX	0.0752117	0.0836372	1.11202	0.0724496
Tmem45b__chr9	0.0750227	0.0834252	1.112	0.0722743
Klhdc4__chr8	0.0880114	0.0978575	1.11187	0.084246
Col19a1__chr1	0.0749801	0.0833635	1.11181	0.0722348
Lpp__chr16	0.210057	0.23353	1.11175	0.189459
Efcab14__chr4	0.102143	0.113536	1.11154	0.0970958
Gramd1a__chr7	0.112211	0.124715	1.11143	0.106141
Srebf2__chr15	0.0867887	0.0964552	1.11138	0.0831256
Pigc__chr1	0.090735	0.100813	1.11107	0.0867367
Gm17066__chr14	0.0892784	0.0991791	1.1109	0.0854055
Mtmr12__chr15	0.084402	0.0937523	1.11078	0.0809349
4930488B22Rik__chr1	0.0746862	0.0829601	1.11078	0.0719621
Churc1__chr12	0.0987019	0.109618	1.11059	0.0939836
1810010H24Rik__chr11	0.0751681	0.0834782	1.11055	0.0724092
Cacna2d2__chr9	0.0743214	0.0825329	1.11049	0.0716235
Tll1__chr8	0.075358	0.0836819	1.11046	0.0725853
Slc24a1__chr9	0.0747776	0.0830333	1.1104	0.0720469
Ttc39b__chr4	0.0928907	0.103146	1.1104	0.0887033
Tacr1__chr6	0.0746936	0.0829353	1.11034	0.0719689
Ulk1__chr5	0.110191	0.122337	1.11023	0.104333
Sfmbt2__chr2	0.0752142	0.0834926	1.11006	0.072452
Rnf145__chr11	0.0978205	0.108587	1.11006	0.0931847
Rbm4__chr19	0.0849966	0.0943475	1.11001	0.0814811
Cnot6l__chr5	0.0935951	0.103887	1.10996	0.0893449
Thoc2__chrX	0.148227	0.164508	1.10983	0.137761
Zfp60__chr7	0.0802119	0.089021	1.10982	0.0770759
Gm14047__chr2	0.0749963	0.0832278	1.10976	0.0722498
N6amt1__chr16	0.0897122	0.0995576	1.10974	0.0858022
Setdb2__chr14	0.0766044	0.0850107	1.10974	0.0737405
Trmt10c__chr16	0.0791683	0.0878556	1.10973	0.0761122
Pclo__chr5	0.0769271	0.0853562	1.10957	0.0740394
Wdr63__chr3	0.0743806	0.0825296	1.10956	0.0716784
Gbp9__chr5	0.0776312	0.0861332	1.10952	0.0746911
Rnf165__chr18	0.0752637	0.0834943	1.10936	0.0724979
Mpv17l__chr16	0.0810646	0.0899216	1.10926	0.0778625
0610030E20Rik__chr6	0.089645	0.0994251	1.1091	0.0857408
Zfp119b__chr17	0.0752248	0.0834269	1.10903	0.0724618
9530082P21Rik__chr17	0.0771412	0.0855514	1.10902	0.0742376
5730409E04Rik__chr4	0.0841657	0.0933369	1.10897	0.0807176
Cyp4f16__chr17	0.0864593	0.0958772	1.10893	0.0828236
Phf1__chr17	0.0882211	0.0978295	1.10891	0.0844381
Ccdc166__chr15	0.0762412	0.0845341	1.10877	0.073404
Gm3258__chr10	0.0752544	0.0834391	1.10876	0.0724893
Niacr1__chr5	0.0778166	0.0862605	1.10851	0.0748626
Agphd1__chr9	0.0778515	0.0862982	1.1085	0.0748949
Prnp__chr2	0.121462	0.13463	1.10842	0.114371
Plekho2__chr9	0.147876	0.163905	1.10839	0.137458
Zfp827__chr8	0.0782117	0.0866783	1.10825	0.0752281
Vmn2r72__chr7	0.0742893	0.0823305	1.10824	0.0715937
Ramp3__chr11	0.0776726	0.0860796	1.10824	0.0747294
Plbd1__chr6	0.114876	0.127305	1.10819	0.108519
Phf7__chr14	0.0768145	0.085111	1.10801	0.0739351
Dtd1__chr2	0.0831071	0.0920794	1.10796	0.079744
Slco1c1__chr6	0.0744557	0.082493	1.10795	0.0717481
Cd244__chr1	0.0852798	0.094484	1.10793	0.0817412
Taf1__chrX	0.100058	0.110857	1.10793	0.095211
4933401B06Rik__chrX	0.0742769	0.0822879	1.10785	0.0715822
A530088E08Rik__chr17	0.0749811	0.083066	1.10783	0.0722357
Laptm5__chr4	0.474	0.525091	1.10779	0.377506
Idnk__chr13	0.0901303	0.0998439	1.10777	0.0861843
Chd6__chr2	0.097913	0.108465	1.10777	0.0932685
Gtf2f1__chr17	0.109257	0.121024	1.1077	0.103496
Hsf1__chr15	0.0923926	0.102339	1.10766	0.0882493
Luc7l3__chr11	0.174446	0.193222	1.10763	0.160075
Cbll1__chr12	0.0855687	0.094772	1.10756	0.0820064
Car15__chr16	0.0758688	0.0840287	1.10755	0.0730589
Zfp654__chr16	0.0810188	0.089729	1.10751	0.0778202
Slfn1__chr11	0.0934548	0.103502	1.10751	0.0892172
Brix1__chr15	0.1019	0.112849	1.10745	0.0968763
Mcm9__chr10	0.0749148	0.082957	1.10735	0.0721742
Dleu2__chr14	0.0850455	0.0941694	1.10728	0.0815261
Farsa__chr8	0.0934012	0.103402	1.10707	0.0891684
Pcid2__chr8	0.0809497	0.0896142	1.10704	0.0777565
4930427A07Rik__chr12	0.0789003	0.0873428	1.107	0.0758646
Zc3h6__chr2	0.0787475	0.0871714	1.10697	0.0757234
4932416K20Rik__chr8	0.0743975	0.0823547	1.10695	0.0716942
Smyd4__chr11	0.0815198	0.09023	1.10685	0.0782821
Gm7854__chr5	0.0743647	0.0823104	1.10685	0.0716637
Nos3__chr5	0.0947173	0.104821	1.10668	0.0903663
Vmn2r83__chr10	0.0742769	0.0821951	1.1066	0.0715822
Tmem116__chr5	0.0764283	0.0845556	1.10634	0.0735773
Retnlg__chr16	0.0862746	0.0954488	1.10634	0.0826542
Ppp3ca__chr3	0.124929	0.138197	1.1062	0.117437
Klf2__chr8	0.206083	0.227954	1.10613	0.186232
Bbip1__chr19	0.10122	0.111961	1.10611	0.0962622
1600012H06Rik__chr17	0.100172	0.110796	1.10605	0.0953149
Ccar1__chr10	0.155085	0.171531	1.10604	0.143654
Ryr1__chr7	0.0760845	0.0841512	1.10602	0.0732588
Gm6639__chr3	0.0755581	0.0835627	1.10594	0.0727709
Meox2__chr12	0.0912888	0.100944	1.10576	0.0872424
Zfp316__chr5	0.0792088	0.0875792	1.10568	0.0761496
Paxip1__chr5	0.0869217	0.0961057	1.10566	0.0832477
Wdr52__chr16	0.0742931	0.0821356	1.10556	0.0715973
Amigo2__chr15	0.0766995	0.084791	1.1055	0.0738286
Elfn1__chr5	0.0762432	0.0842864	1.10549	0.0734059
Slc28a2__chr2	0.0987683	0.109188	1.10549	0.0940437
Dpysl5__chr5	0.0743982	0.0822468	1.10549	0.0716948
Arhgap26__chr18	0.0897968	0.0992675	1.10547	0.0858795
Cap1__chr4	0.0860322	0.0950986	1.10538	0.0824319
Stx16__chr2	0.0961878	0.106308	1.10521	0.0917029
Eftud1__chr7	0.0817635	0.0903655	1.10521	0.0785068
Dbx2__chr15	0.074626	0.0824759	1.10519	0.0719062
Haus2__chr2	0.0807343	0.0892265	1.10519	0.0775579
Gm4827__chr16	0.0743997	0.0822194	1.1051	0.0716962
Tcp11l2__chr10	0.100166	0.110683	1.10499	0.0953089
Lrrn4__chr2	0.0763882	0.084407	1.10497	0.0735402
1700034K08Rik__chr9	0.0743656	0.0821705	1.10495	0.0716645
Trim11__chr11	0.0913844	0.10097	1.10489	0.0873296
Gin1__chr1	0.0779076	0.0860705	1.10478	0.0749468
Gm5431__chr11	0.0818296	0.0903985	1.10472	0.0785676
Ccl25__chr8	0.0769748	0.0850323	1.10468	0.0740835
Ggps1__chr13	0.0840623	0.0928609	1.10467	0.0806226
Plekha2__chr8	0.124905	0.137974	1.10463	0.117416
Azi2__chr9	0.10235	0.113038	1.10443	0.097283
Zfp92__chrX	0.075318	0.0831634	1.10416	0.0725482
Orai2__chr5	0.082163	0.090721	1.10416	0.0788748
Mterf__chr5	0.076257	0.0841952	1.1041	0.0734186
C130080G10Rik__chr2	0.10292	0.11363	1.10407	0.0977968
Polk__chr13	0.08391	0.092642	1.10406	0.0804825
Ttc9c__chr19	0.102057	0.112676	1.10405	0.097018
Impg1__chr9	0.0743368	0.0820698	1.10403	0.0716378
Lrrc33__chr16	0.160241	0.176907	1.10401	0.148058
Draxin__chr4	0.0745581	0.0823098	1.10397	0.0718432
Gm20199__chr9	0.0761016	0.0840128	1.10395	0.0732747
Dhx37__chr5	0.0760412	0.0839449	1.10394	0.0732187
BC048602__chr15	0.0743783	0.0821034	1.10386	0.0716764
Dgkb__chr12	0.074756	0.082515	1.10379	0.0720269
Lbr__chr1	0.116032	0.128074	1.10379	0.109549
Prss53__chr7	0.0756421	0.0834915	1.10377	0.0728488
Tgfbr1__chr4	0.120414	0.132904	1.10373	0.113443
Stat3__chr11	0.212383	0.234401	1.10367	0.191342
Gm6086__chr1	0.0750364	0.0828126	1.10363	0.072287
2900092D14Rik__chr1	0.0744965	0.0822107	1.10355	0.071786
Zbtb9__chr17	0.0786294	0.0867605	1.10341	0.0756143
Meg3__chr12	0.126943	0.140063	1.10336	0.119212
Oas2__chr5	0.0889026	0.0980911	1.10335	0.0850618
Gm14015__chr2	0.0755292	0.0833295	1.10328	0.0727441
Arhgef6__chrX	0.105021	0.11586	1.1032	0.099691
1700125G22Rik__chr3	0.0745366	0.082228	1.10319	0.0718233
4933404K08Rik__chr13	0.0752432	0.0830063	1.10317	0.0724789
Stox2__chr8	0.0897549	0.0990145	1.10317	0.0858412
Ccdc134__chr15	0.0817078	0.0901365	1.10316	0.0784554
Gm15987__chr6	0.0747408	0.0824494	1.10314	0.0720128
Sash3__chrX	0.0906931	0.100041	1.10307	0.0866985
Lrrfip1__chr1	0.157097	0.173276	1.10299	0.145375
Ltb__chr17	0.0781618	0.086211	1.10298	0.0751819
Intu__chr3	0.0836446	0.0922511	1.10289	0.0802384
Sltm__chr9	0.127747	0.140891	1.10289	0.11992
Sptlc1__chr13	0.100903	0.111281	1.10284	0.0959759
Tbc1d5__chr17	0.0841989	0.0928574	1.10283	0.0807482
Mov10__chr3	0.0816203	0.0900111	1.1028	0.0783748
Gm7168__chr17	0.0745892	0.0822543	1.10277	0.071872
Fos__chr12	0.821133	0.905479	1.10272	0.439888
C77370__chrX	0.0751518	0.0828673	1.10267	0.0723941
Cep110__chr2	0.0937237	0.103342	1.10262	0.0894621
Lipg__chr18	0.0745042	0.0821429	1.10253	0.0717932
Mgarp__chr3	0.0762039	0.0840111	1.10245	0.0733694
2610034B18Rik__chr7	0.0836991	0.0922719	1.10242	0.0802886
Arid5a__chr1	0.0952671	0.105025	1.10242	0.0908663
Ebna1bp2__chr4	0.118603	0.130748	1.1024	0.111836
Arhgap30__chr1	0.118204	0.130306	1.10238	0.111481
Itga2b__chr11	0.0762249	0.0840287	1.10238	0.073389
Acap1__chr11	0.0762085	0.0840105	1.10238	0.0733738
Acr__chr15	0.0767214	0.0845735	1.10235	0.0738488
Rabepk__chr2	0.0825998	0.0910187	1.10192	0.079277
4930555G01Rik__chr14	0.0748384	0.0824585	1.10182	0.0721034
Dgcr8__chr16	0.0774261	0.0853035	1.10174	0.0745013
Mllt10__chr2	0.0969717	0.106833	1.10169	0.0924146
Nfatc1__chr18	0.107573	0.118505	1.10163	0.101985
Adamtsl1__chr4	0.0767711	0.0845695	1.10158	0.0738949
Bsn__chr9	0.0746252	0.0822046	1.10157	0.0719055
Pla2g2d__chr4	0.0784293	0.0863836	1.10142	0.0754292
Stk19__chr17	0.0882673	0.0972172	1.1014	0.0844803
1300002E11Rik__chr16	0.0776744	0.0855401	1.10126	0.074731
Ggcx__chr6	0.0852185	0.0938446	1.10122	0.0816849
Bank1__chr3	0.0758016	0.0834722	1.10119	0.0729966
Golt1a__chr1	0.0742769	0.0817897	1.10115	0.0715822
Prokr2__chr2	0.0749504	0.0825278	1.1011	0.0722072
Tanc2__chr11	0.0896953	0.0987602	1.10106	0.0857867
Uxt__chrX	0.0878774	0.0967532	1.101	0.0841233
Avl9__chr6	0.0811412	0.089336	1.101	0.0779331
1700011J10Rik__chr2	0.0844375	0.0929494	1.10081	0.0809675
Kras__chr6	0.13791	0.15181	1.1008	0.128819
Glipr2__chr4	0.117255	0.129066	1.10073	0.110637
Ptk6__chr2	0.0742769	0.0817589	1.10073	0.0715822
Rgs14__chr13	0.0823837	0.0906757	1.10065	0.079078
Tor1aip2__chr1	0.130427	0.143544	1.10057	0.122275
Ogfrl1__chr1	0.118117	0.129991	1.10053	0.111404
Gpc3__chrX	0.0791239	0.0870767	1.10051	0.0760712
1700010I02Rik__chr3	0.0745987	0.082085	1.10035	0.0718809
Pramef8__chr4	0.0807393	0.088841	1.10034	0.0775625
Irf2__chr8	0.119544	0.131536	1.10031	0.112671
Itpkc__chr7	0.0769476	0.0846665	1.10031	0.0740584
Fbxo17__chr7	0.0805107	0.0885835	1.10027	0.0773515
Grina__chr15	0.176049	0.19367	1.10009	0.161419
Kansl1__chr11	0.102623	0.112893	1.10008	0.0975293
Zfp322a__chr13	0.0845943	0.0930552	1.10002	0.0811116
Amhr2__chr15	0.0743213	0.0817505	1.09996	0.0716234
Topaz1__chr9	0.0746082	0.0820611	1.09989	0.0718897
Prkg2__chr5	0.0771544	0.0848591	1.09986	0.0742498
Scn8a__chr15	0.0765847	0.0842283	1.09981	0.0737223
Slc2a10__chr2	0.0816629	0.089796	1.09959	0.078414
Csta__chr16	0.0748024	0.0822512	1.09958	0.0720699
Msantd2__chr9	0.0900684	0.0990215	1.0994	0.0861278
Pcdh10__chr3	0.0754521	0.0829505	1.09938	0.0726726
Dcaf8__chr1	0.108597	0.119389	1.09937	0.102905
Fam102b__chr3	0.11108	0.122108	1.09928	0.105129
Tfap2a__chr13	0.0757445	0.0832639	1.09927	0.0729437
Ehf__chr2	0.0743019	0.0816766	1.09925	0.0716054
Pkn1__chr8	0.0954752	0.104949	1.09923	0.0910554
Trim41__chr11	0.0981063	0.107841	1.09922	0.0934437
Dgcr6__chr16	0.0941306	0.10347	1.09922	0.0898324
4931408D14Rik__chr19	0.0747434	0.0821444	1.09902	0.0720152
Tomm34__chr2	0.106079	0.116583	1.09901	0.100643
Cep120__chr18	0.0870558	0.095652	1.09874	0.0833705
Skida1__chr2	0.0760692	0.0835805	1.09874	0.0732447
Pnkp__chr7	0.0932177	0.102421	1.09873	0.0890012
Gmeb2__chr2	0.080918	0.0889019	1.09867	0.0777273
Pycr1__chr11	0.0762935	0.0838166	1.09861	0.0734525
4932414N04Rik__chr2	0.0743881	0.0817156	1.0985	0.0716854
Il13ra1__chrX	0.109875	0.120696	1.09849	0.10405
Gtpbp2__chr17	0.109159	0.119909	1.09849	0.103408
Cts8__chr13	0.0748406	0.0822109	1.09848	0.0721053
Scml4__chr10	0.0775741	0.0852073	1.0984	0.0746382
Recql5__chr11	0.0801825	0.0880701	1.09837	0.0770487
Mbp__chr18	0.0880447	0.0967033	1.09834	0.0842765
Zfp202__chr9	0.0791622	0.086944	1.0983	0.0761065
Slc4a7__chr14	0.0959265	0.10535	1.09823	0.0914656
Gripap1__chrX	0.096767	0.106272	1.09823	0.0922288
Ece1__chr4	0.142848	0.156862	1.0981	0.133111
Secisbp2__chr13	0.0780976	0.0857552	1.09805	0.0751225
Ppapdc2__chr19	0.0896574	0.0984474	1.09804	0.0857521
Frmd3__chr4	0.0746313	0.0819471	1.09803	0.0719111
Timm17b__chrX	0.108041	0.118632	1.09802	0.102406
Abcd4__chr12	0.087897	0.0965087	1.09798	0.0841413
Gm5591__chr7	0.0743336	0.0816151	1.09796	0.0716348
Prdm1__chr10	0.0804472	0.0883212	1.09788	0.077293
Zmym4__chr4	0.0958525	0.105229	1.09782	0.0913983
Numa1__chr7	0.102416	0.112426	1.09773	0.0973427
Slc14a2__chr18	0.0742932	0.0815516	1.0977	0.0715974
Ceacam18__chr7	0.0743938	0.0816616	1.09769	0.0716907
Elavl4__chr4	0.0747335	0.0820334	1.09768	0.072006
Tpgs1__chr10	0.0966452	0.106079	1.09761	0.0921182
Gm872__chr10	0.0742769	0.081527	1.09761	0.0715822
Sv2a__chr3	0.0770422	0.0845556	1.09752	0.0741459
Cog3__chr14	0.088773	0.0974266	1.09748	0.0849432
Ankrd33b__chr15	0.0815675	0.0895108	1.09738	0.0783261
Samd8__chr14	0.105516	0.11578	1.09727	0.100136
Neurod2__chr11	0.0744396	0.0816797	1.09726	0.0717332
Mbnl3__chrX	0.0784804	0.0861133	1.09726	0.0754764
Ccnl1__chr3	0.138266	0.151709	1.09723	0.129129
Gm8267__chr14	0.0742785	0.0814955	1.09716	0.0715836
Slc5a7__chr17	0.07449	0.0817213	1.09708	0.07178
Gm9962__chr7	0.0752391	0.0825359	1.09698	0.0724751
Xlr5b__chrX	0.0744743	0.081696	1.09697	0.0717655
Il12a__chr3	0.0746344	0.0818588	1.0968	0.071914
Nov__chr15	0.0778222	0.085355	1.0968	0.0748677
Srgn__chr10	0.90478	0.992276	1.0967	0.404579
Il16__chr7	0.0874329	0.0958841	1.09666	0.0837161
Tead2__chr7	0.0845838	0.0927591	1.09665	0.0811019
Sv2c__chr13	0.0766322	0.0840363	1.09662	0.0737662
Kif11__chr19	0.0866401	0.0950086	1.09659	0.0829894
Naa60__chr16	0.143937	0.157824	1.09648	0.134053
Zfp963__chr8	0.0782973	0.0858515	1.09648	0.0753072
Mical1__chr10	0.0929299	0.101896	1.09648	0.088739
Oasl2__chr5	0.108441	0.118903	1.09648	0.102764
Grb2__chr11	0.200821	0.220168	1.09634	0.181938
Pank3__chr11	0.103673	0.113642	1.09617	0.0984758
Exosc3__chr4	0.0887605	0.0972961	1.09616	0.0849318
4833411C07Rik__chr8	0.074344	0.0814926	1.09616	0.0716444
9230105E05Rik__chr10	0.0773705	0.084799	1.09601	0.0744498
Ceacam20__chr7	0.0743058	0.0814368	1.09597	0.071609
Hormad1__chr3	0.0744617	0.0815965	1.09582	0.0717538
5830416P10Rik__chr19	0.0795013	0.0871132	1.09575	0.0764198
Col4a3bp__chr13	0.105914	0.116052	1.09572	0.100494
Tmem181a__chr17	0.0811204	0.0888852	1.09572	0.0779139
Tatdn2__chr6	0.0887405	0.0972319	1.09569	0.0849135
Dedd2__chr7	0.0809016	0.0886415	1.09567	0.0777121
Klra1__chr6	0.0744692	0.0815936	1.09567	0.0717607
C1d__chr11	0.105883	0.116011	1.09565	0.100466
Gad2__chr2	0.0771224	0.0844978	1.09563	0.0742202
Igfn1__chr1	0.074301	0.0814016	1.09556	0.0716046
Gm15328__chr18	0.074436	0.0815461	1.09552	0.0717298
Epsti1__chr14	0.0874509	0.0958029	1.09551	0.0837326
Speer8-ps1__chr5	0.0742919	0.0813858	1.09549	0.0715961
Pdxk-ps__chr17	0.0748723	0.0820198	1.09546	0.0721348
Apba1__chr19	0.0786844	0.0861911	1.0954	0.0756651
1600010M07Rik__chr7	0.0775493	0.0849433	1.09534	0.0746153
4930417O22Rik__chr11	0.0742915	0.0813734	1.09533	0.0715957
Brd2__chr17	0.182621	0.200016	1.09525	0.166913
Cwc22__chr2	0.0869076	0.0951846	1.09524	0.0832347
Pum2__chr12	0.16321	0.178751	1.09522	0.150584
Gm13251__chr4	0.0754381	0.0826147	1.09513	0.0726596
Gngt2__chr11	0.123634	0.135388	1.09507	0.116293
F10__chr8	0.0963601	0.10551	1.09495	0.0918594
Ift88__chr14	0.0778524	0.0852439	1.09494	0.0748957
Sox4__chr13	0.128119	0.14028	1.09493	0.120247
Strbp__chr2	0.0879846	0.0963341	1.0949	0.0842215
Elavl3__chr9	0.0749026	0.0820064	1.09484	0.0721629
Fam21__chr6	0.119682	0.131031	1.09483	0.112794
Safb__chr17	0.0949641	0.103966	1.0948	0.0905907
Zscan5b__chr7	0.0742886	0.0813253	1.09472	0.071593
Gm20748__chr18	0.0811514	0.0888357	1.09469	0.0779425
Apln__chrX	0.111745	0.122311	1.09455	0.105724
Slx4__chr16	0.0822451	0.0900154	1.09448	0.0789504
Stambpl1__chr19	0.07969	0.0872048	1.0943	0.0765941
Tubgcp6__chr15	0.0781929	0.0855638	1.09427	0.0752107
Lrif1__chr3	0.0872006	0.0954204	1.09426	0.0835032
Amt__chr9	0.0743462	0.0813353	1.09401	0.0716465
Nrxn1__chr17	0.0760969	0.0832502	1.094	0.0732703
Bin3__chr14	0.0899329	0.0983826	1.09396	0.0860039
Hoxb1__chr11	0.0756969	0.0828021	1.09386	0.0728996
Nr1h2__chr7	0.126863	0.138763	1.0938	0.119142
Col6a4__chr9	0.0743174	0.0812876	1.09379	0.0716198
Zmat4__chr8	0.0742769	0.0812423	1.09378	0.0715822
Mtrr__chr13	0.0897495	0.0981636	1.09375	0.0858363
Ago3__chr4	0.0811214	0.0887237	1.09372	0.0779148
Tbkbp1__chr11	0.086039	0.0940984	1.09367	0.0824381
Jag2__chr12	0.0787177	0.0860883	1.09363	0.0756958
Ephx1__chr1	0.101701	0.111217	1.09357	0.0966966
Il18bp__chr7	0.0812484	0.0888451	1.0935	0.0780319
Arid2__chr15	0.112557	0.123078	1.09347	0.10645
Ndufaf3__chr9	0.0884605	0.0967279	1.09346	0.0846572
Egfl7__chr2	0.184819	0.202082	1.0934	0.168742
Mob3a__chr10	0.0952661	0.10416	1.09336	0.0908653
Zkscan1__chr5	0.088856	0.0971355	1.09318	0.0850191
Arl5c__chr11	0.0777612	0.0850065	1.09317	0.0748113
Zbed6__chr1	0.0818742	0.0894979	1.09311	0.0786087
Il1rapl2__chrX	0.0742769	0.0811916	1.09309	0.0715822
Timm44__chr8	0.100317	0.109655	1.09308	0.095446
Six1__chr12	0.0750822	0.0820698	1.09307	0.0723295
D130020L05Rik__chr12	0.0758649	0.0829244	1.09305	0.0730553
Sorcs1__chr19	0.074968	0.0819423	1.09303	0.0722236
Polr2k__chr15	0.105521	0.115323	1.09289	0.100141
Fam161b__chr12	0.0786895	0.0859912	1.09279	0.0756698
Gabrb3__chr7	0.0749619	0.0819055	1.09263	0.0722179
Pnma2__chr14	0.0751982	0.0821631	1.09262	0.0724371
Hace1__chr10	0.0823811	0.0900088	1.09259	0.0790757
Cpeb4__chr11	0.0761774	0.0832251	1.09252	0.0733449
Ap1s2__chrX	0.0989058	0.108046	1.09242	0.0941683
Apold1__chr6	0.12656	0.13825	1.09237	0.118875
Mug1__chr6	0.0744672	0.0813453	1.09236	0.0717589
Gpd1__chr15	0.0812417	0.0887414	1.09231	0.0780258
Pdxk__chr10	0.120308	0.131413	1.0923	0.113349
Gm4984__chrX	0.074734	0.0816305	1.09228	0.0720065
Sh3bp2__chr5	0.0932008	0.101785	1.0921	0.0889858
Cpne1__chr2	0.113103	0.123518	1.09208	0.106938
Snora31__chr14	0.0761228	0.0831269	1.09201	0.0732943
Igf1r__chr7	0.134461	0.146832	1.09201	0.125809
Matk__chr10	0.0766144	0.0836477	1.0918	0.0737497
9930104L06Rik__chr4	0.0815632	0.0890508	1.0918	0.0783221
Ccm2__chr11	0.0934219	0.101997	1.09179	0.0891873
Gm6307__chr2	0.0760233	0.0829906	1.09165	0.0732021
Myo9a__chr9	0.0943505	0.102987	1.09153	0.0900326
Fam154a__chr4	0.0742934	0.0810832	1.09139	0.0715975
G530011O06Rik__chrX	0.0980281	0.106984	1.09136	0.0933729
Gm14204__chr2	0.0764594	0.0834426	1.09133	0.0736062
Rpf2__chr10	0.086225	0.0940987	1.09132	0.0826087
Gm11346__chr13	0.0748601	0.081696	1.09132	0.0721235
Gm16973__chr14	0.0770991	0.0841379	1.0913	0.0741986
Nup54__chr5	0.0854992	0.0932902	1.09112	0.0819426
Acvr1c__chr2	0.0749817	0.081811	1.09108	0.0722363
Pcdh9__chr14	0.0793675	0.0865835	1.09092	0.0762962
Rfx5__chr3	0.0785033	0.0856366	1.09087	0.0754976
Zfp942__chr17	0.0779639	0.085047	1.09085	0.0749988
Ctns__chr11	0.0837591	0.0913685	1.09085	0.0803438
Zfp397__chr18	0.0816974	0.0891124	1.09076	0.0784458
Ppm1m__chr9	0.0910499	0.0993108	1.09073	0.0870243
Chkb__chr15	0.0854727	0.093219	1.09063	0.0819183
Fam19a2__chr10	0.0743405	0.0810748	1.09059	0.0716412
Ednra__chr8	0.080987	0.0883141	1.09047	0.0777909
Gucy2e__chr11	0.0744376	0.0811665	1.0904	0.0717313
Oxt__chr2	0.0743158	0.0810267	1.0903	0.0716183
Snora17__chr2	0.0744214	0.0811415	1.0903	0.0717164
Rbm8a__chr3	0.13673	0.149071	1.09025	0.127791
C030023E24Rik__chrX	0.0743372	0.0810415	1.09019	0.0716381
Mbd5__chr2	0.0780881	0.0851285	1.09016	0.0751137
Rbl1__chr2	0.0936032	0.102042	1.09016	0.0893524
St3gal4__chr9	0.0931259	0.101506	1.08998	0.0889176
Adamts6__chr13	0.0760204	0.0828607	1.08998	0.0731994
Kif26a__chr12	0.0919819	0.100258	1.08997	0.0878748
Cacng2__chr15	0.0745236	0.0812235	1.0899	0.0718112
Mylip__chr13	0.0997245	0.108681	1.08982	0.0949095
Slc2a3__chr6	0.0801815	0.087383	1.08982	0.0770478
Trp63__chr16	0.0747393	0.08145	1.08979	0.0720113
9630013A20Rik__chr14	0.074323	0.0809941	1.08976	0.071625
Igsf9__chr1	0.0754703	0.082241	1.08971	0.0726894
Blcap__chr2	0.101225	0.110305	1.0897	0.0962664
A530054K11Rik__chr13	0.0789189	0.0859941	1.08965	0.0758818
Ap2a2__chr7	0.152507	0.166177	1.08963	0.141443
Tmem185b__chr1	0.0925253	0.100817	1.08962	0.0883702
Narfl__chr17	0.0859548	0.093656	1.0896	0.0823608
Luzp2__chr7	0.075004	0.0817234	1.08959	0.072257
Phc3__chr3	0.0974395	0.106165	1.08955	0.0928391
Denr__chr5	0.124241	0.135361	1.0895	0.116829
Irg1__chr14	0.0778295	0.0847947	1.08949	0.0748745
Zfp772__chr7	0.077696	0.0846446	1.08943	0.074751
Syf2__chr4	0.116849	0.127289	1.08935	0.110277
2300009A05Rik__chr9	0.0872922	0.0950827	1.08925	0.0835872
Pin4__chrX	0.105403	0.114807	1.08922	0.100035
1700009P17Rik__chr1	0.0751284	0.0818272	1.08916	0.0723724
Znrf3__chr11	0.0792727	0.0863373	1.08912	0.0762087
4930509J09Rik__chr3	0.0743829	0.0810052	1.08903	0.0716805
Idi2__chr13	0.0745217	0.0811547	1.08901	0.0718094
Rpgrip1l__chr8	0.0769884	0.083838	1.08897	0.0740961
4933432I03Rik__chr14	0.0746402	0.0812796	1.08895	0.0719194
Slc22a3__chr17	0.075043	0.0817148	1.08891	0.0722931
Stxbp4__chr11	0.0791302	0.0861632	1.08888	0.076077
Tlcd1__chr11	0.0788846	0.0858954	1.08887	0.0758501
Timd2__chr11	0.0752374	0.0819235	1.08887	0.0724734
Kcnd3__chr3	0.0758698	0.082603	1.08875	0.0730599
Ofcc1__chr13	0.0742769	0.0808575	1.08859	0.0715822
Casp4__chr9	0.0908197	0.0988571	1.0885	0.0868141
Lsm6__chr8	0.115097	0.125271	1.0884	0.108716
2700081O15Rik__chr19	0.0850316	0.0925469	1.08838	0.0815133
Polr3gl__chr3	0.0849988	0.0925068	1.08833	0.0814831
Milr1__chr11	0.104337	0.113549	1.08829	0.099075
Wdr85__chr2	0.076415	0.0831608	1.08828	0.0735651
Dnahc8__chr17	0.0746235	0.0812066	1.08822	0.0719039
Gm15408__chr5	0.0750706	0.0816905	1.08818	0.0723188
Dcaf12__chr4	0.114765	0.124884	1.08817	0.10842
Lrrc8d__chr5	0.0931019	0.101309	1.08815	0.0888957
Uba7__chr9	0.089253	0.0971195	1.08814	0.0853823
2610305D13Rik__chr4	0.0862429	0.0938411	1.0881	0.0826251
B4galnt2__chr11	0.0746924	0.0812669	1.08802	0.0719679
Wdfy1__chr1	0.0986512	0.107313	1.0878	0.0939376
Pnpt1__chr11	0.0894782	0.0973336	1.08779	0.0855883
Agrn__chr4	0.10031	0.109111	1.08774	0.0954391
Ndp__chrX	0.074367	0.0808897	1.08771	0.0716659
Unc5d__chr8	0.0748932	0.0814607	1.08769	0.0721542
Elavl2__chr4	0.0748099	0.0813631	1.0876	0.0720769
Rnf122__chr8	0.0803367	0.0873675	1.08752	0.0771911
Dna2__chr10	0.0803134	0.0873421	1.08752	0.0771695
Zfp456__chr13	0.0750159	0.0815737	1.08742	0.0722681
4931408C20Rik__chr1	0.074992	0.0815474	1.08741	0.0722458
Fam219a__chr4	0.083074	0.0903355	1.08741	0.0797135
Ralb__chr1	0.124359	0.135197	1.08715	0.116934
Alg6__chr4	0.0851359	0.092548	1.08706	0.081609
Lrrc18__chr14	0.0750177	0.0815483	1.08706	0.0722696
Rcbtb2__chr14	0.116829	0.126994	1.08701	0.110258
Ttk__chr9	0.0785099	0.0853358	1.08694	0.0755037
Zcchc16__chrX	0.0745687	0.0810515	1.08694	0.071853
9030204H09Rik__chr2	0.074331	0.0807909	1.08691	0.0716324
Ets2__chr16	0.165682	0.18008	1.0869	0.152681
Cylc2__chr4	0.0743998	0.0808628	1.08687	0.0716963
Tbc1d23__chr16	0.0937824	0.101929	1.08686	0.0895155
Atpaf2__chr11	0.0928881	0.100953	1.08682	0.0887009
Cel__chr2	0.0744912	0.0809585	1.08682	0.0717811
Lrp1b__chr2	0.0755699	0.0821302	1.08681	0.0727818
Lipe__chr7	0.0889547	0.0966736	1.08677	0.0851095
Wdr62__chr7	0.0803705	0.0873422	1.08675	0.0772222
Nr5a2__chr1	0.0758529	0.0824297	1.0867	0.0730441
Ces1f__chr8	0.0742769	0.0807109	1.08662	0.0715822
D330041H03Rik__chr17	0.0747884	0.0812639	1.08658	0.0720569
Dcp2__chr18	0.0933218	0.1014	1.08656	0.0890961
1600002D24Rik__chr16	0.074338	0.0807717	1.08655	0.0716389
Fam212b__chr3	0.0783895	0.0851698	1.0865	0.0753924
Dnahc5__chr15	0.0745843	0.0810351	1.08649	0.0718675
Uimc1__chr13	0.0942678	0.10242	1.08648	0.0899574
Slc25a27__chr17	0.0773811	0.0840691	1.08643	0.0744597
Slc7a13__chr4	0.0747785	0.0812402	1.08641	0.0720477
Atg7__chr6	0.099081	0.107641	1.08639	0.094327
Lin54__chr5	0.0820842	0.0891729	1.08636	0.0788022
Lcorl__chr5	0.086476	0.0939414	1.08633	0.082839
Lin7a__chr10	0.075042	0.0815168	1.08628	0.0722922
2610044O15Rik8__chr8	0.0830029	0.0901646	1.08628	0.0796481
Elp4__chr2	0.0779161	0.0846387	1.08628	0.0749547
Sh3gl2__chr4	0.0749748	0.0814434	1.08628	0.0722298
Gm5069__chr1	0.0747963	0.0812489	1.08627	0.0720643
Gm19434__chr6	0.0758346	0.0823762	1.08626	0.0730272
4930520P13Rik__chr13	0.0743299	0.0807412	1.08625	0.0716314
Alox5ap__chr5	0.254065	0.275958	1.08617	0.224357
Timeless__chr10	0.0896475	0.0973719	1.08616	0.085743
Folh1__chr7	0.0743548	0.0807607	1.08615	0.0716545
Tnfsf14__chr17	0.079677	0.0865339	1.08606	0.076582
Car3__chr3	0.0743705	0.0807679	1.08602	0.0716691
A330035P11Rik__chr14	0.0743241	0.0807153	1.08599	0.071626
Ikzf5__chr7	0.0963347	0.104611	1.08591	0.0918363
Olfr1046__chr2	0.0746076	0.0810169	1.08591	0.0718892
Sos2__chr12	0.086716	0.0941653	1.0859	0.083059
Tktl2__chr8	0.0743995	0.0807877	1.08586	0.071696
Gja8__chr3	0.075125	0.0815747	1.08585	0.0723693
Dcun1d1__chr3	0.104353	0.113311	1.08585	0.0990891
Olfr862__chr9	0.0742769	0.0806331	1.08557	0.0715822
Nkx3-1__chr14	0.0748999	0.081308	1.08555	0.0721604
Slc7a12__chr3	0.0742769	0.0806303	1.08554	0.0715822
Rab32__chr10	0.1234	0.133952	1.08551	0.116086
Phip__chr9	0.136273	0.147921	1.08547	0.127392
Wdr48__chr9	0.0805803	0.0874673	1.08547	0.0774158
Gpr85__chr6	0.0760904	0.0825931	1.08546	0.0732642
Arhgef33__chr17	0.0742956	0.0806419	1.08542	0.0715995
Armc7__chr11	0.0785706	0.0852711	1.08528	0.0755598
Csn3__chr5	0.0743902	0.0807341	1.08528	0.0716874
Gm21221__chr5	0.0744639	0.080814	1.08528	0.0717558
Zc3h12d__chr10	0.08049	0.0873532	1.08527	0.0773325
Zfp266__chr9	0.0935022	0.101455	1.08505	0.0892604
Cyp3a13__chr5	0.0751928	0.081587	1.08504	0.0724321
St8sia4__chr1	0.098951	0.107362	1.085	0.0942092
Slc12a9__chr5	0.0812983	0.0882014	1.08491	0.0780779
Rogdi__chr16	0.087717	0.0951551	1.0848	0.0839764
Cnppd1__chr1	0.123827	0.134324	1.08477	0.116464
Trmt1l__chr1	0.0888959	0.0964311	1.08477	0.0850556
Arid5b__chr10	0.0879248	0.0953754	1.08474	0.0841667
Cyb5r1__chr1	0.122678	0.133066	1.08468	0.115448
Stam__chr2	0.0868917	0.0942438	1.08461	0.0832202
4632428N05Rik__chr10	0.154604	0.167685	1.08461	0.143242
Gm4224__chr7	0.0743234	0.0806066	1.08454	0.0716254
Synrg__chr11	0.0937784	0.1017	1.08447	0.0895118
4930429D17Rik__chr5	0.0742769	0.0805487	1.08444	0.0715822
Foxn2__chr17	0.0905949	0.098244	1.08443	0.0866087
Ulk3__chr9	0.08248	0.089441	1.0844	0.0791667
Fam160a2__chr7	0.0843834	0.0914963	1.08429	0.0809177
Gm4710__chr17	0.0743578	0.0806253	1.08429	0.0716573
Prrc2c__chr1	0.17381	0.188459	1.08428	0.15954
Gm15698__chr11	0.0746156	0.0808988	1.08421	0.0718966
Fam199x__chrX	0.0834757	0.0904998	1.08415	0.0800831
Sdhaf1__chr7	0.0865491	0.0938319	1.08415	0.082906
Katna1__chr10	0.0917101	0.0994251	1.08412	0.0876268
Elmsan1__chr12	0.0820913	0.0889915	1.08406	0.0788087
Mcm2__chr6	0.0977058	0.105916	1.08404	0.0930806
Oip5__chr2	0.0787958	0.0854165	1.08402	0.075768
Epas1__chr17	0.256111	0.27762	1.08398	0.225943
Gm9705__chr17	0.0742864	0.080511	1.08379	0.071591
Kcnq5__chr1	0.0747248	0.0809857	1.08379	0.0719979
Fdxacb1__chr9	0.0759634	0.0823269	1.08377	0.0731466
Hsbp1l1__chr18	0.0756508	0.081988	1.08377	0.0728568
Snora44__chr4	0.0743463	0.0805706	1.08372	0.0716466
H2-Q1__chr17	0.0757518	0.082087	1.08363	0.0729505
L1td1__chr4	0.0749346	0.0811996	1.08361	0.0721926
Vrk1__chr12	0.092538	0.100274	1.08359	0.0883819
Mkx__chr18	0.0747685	0.0810169	1.08357	0.0720385
Rufy2__chr10	0.085781	0.0929404	1.08346	0.0822013
Kansl1l__chr1	0.0801595	0.0868477	1.08344	0.0770275
Fam118a__chr15	0.0819529	0.0887907	1.08344	0.0786812
Fat3__chr9	0.0773102	0.083759	1.08341	0.074394
Gm9733__chr3	0.0752515	0.0815253	1.08337	0.0724866
Ogt__chrX	0.115049	0.12464	1.08336	0.108674
Csmd1__chr8	0.074605	0.0808239	1.08336	0.0718868
Dusp2__chr2	0.0905053	0.0980449	1.08331	0.086527
Ncam1__chr9	0.0984574	0.106646	1.08317	0.0937621
Ccdc55__chr11	0.0998904	0.108195	1.08314	0.0950597
2810408I11Rik__chr1	0.0762428	0.082576	1.08307	0.0734056
Rabgap1__chr2	0.100509	0.108854	1.08303	0.095619
A730020E08Rik__chr6	0.0765175	0.0828698	1.08302	0.07366
Prickle3__chrX	0.0928915	0.1006	1.08298	0.088704
Rgs4__chr1	0.082619	0.0894682	1.0829	0.0792947
Fam203a__chr15	0.0810768	0.0877932	1.08284	0.0778737
Mir1954__chr2	0.0748836	0.0810858	1.08282	0.0721453
Cep104__chr4	0.0782051	0.0846809	1.08281	0.0752219
Arhgef7__chr8	0.125504	0.135895	1.08279	0.117944
Iqcc__chr4	0.076665	0.0830014	1.08265	0.0737967
Dkk1__chr19	0.0745744	0.0807368	1.08263	0.0718583
Crls1__chr2	0.0916794	0.099248	1.08255	0.0875988
Cntn5__chr9	0.0754995	0.0817227	1.08243	0.0727165
Gm16938__chr7	0.0762782	0.0825594	1.08235	0.0734383
Sft2d2__chr1	0.11486	0.124319	1.08235	0.108506
Fam83a__chr15	0.0765095	0.0828094	1.08234	0.0736526
2810454H06Rik__chr6	0.0756499	0.081877	1.08231	0.072856
Ripply1__chrX	0.0748497	0.0810099	1.0823	0.0721138
Sgol1__chr17	0.080345	0.0869552	1.08227	0.0771987
Nkd2__chr13	0.0798719	0.086442	1.08226	0.0767621
Tnrc18__chr5	0.114404	0.123813	1.08224	0.108099
Lgr5__chr10	0.0744555	0.0805761	1.0822	0.071748
Dusp16__chr6	0.0877497	0.0949608	1.08218	0.0840064
Insl5__chr4	0.0742769	0.0803791	1.08215	0.0715822
Cwf19l1__chr19	0.081673	0.0883805	1.08213	0.0784233
Ddx52__chr11	0.0989387	0.107062	1.0821	0.0941981
Rnf215__chr11	0.0950724	0.102872	1.08204	0.0906892
Gm6300__chr3	0.0742769	0.0803684	1.08201	0.0715822
Ncam2__chr16	0.0747158	0.0808345	1.08189	0.0719896
Anxa3__chr5	0.17042	0.184352	1.08175	0.156686
Mro__chr18	0.075539	0.0817123	1.08172	0.0727532
Asxl1__chr2	0.106862	0.115594	1.08171	0.101347
Gm14137__chr2	0.0745017	0.0805871	1.08168	0.0717908
Zfp120__chr2	0.0895132	0.0968097	1.08151	0.0856202
Ngly1__chr14	0.089699	0.0970093	1.0815	0.0857901
1110046J04Rik__chr13	0.0765249	0.0827612	1.08149	0.0736669
Zwilch__chr9	0.0814414	0.0880754	1.08146	0.0782099
Nrp__chr12	0.0799548	0.0864658	1.08143	0.0768386
Rp1__chr1	0.0748615	0.0809518	1.08135	0.0721247
9330159F19Rik__chr10	0.0745978	0.0806654	1.08134	0.0718801
Kif2a__chr13	0.104927	0.113458	1.08131	0.0996058
Gm10548__chr18	0.0764407	0.0826542	1.08128	0.0735889
Rgag4__chrX	0.0757825	0.08194	1.08125	0.0729789
Caap1__chr4	0.0798511	0.0863388	1.08125	0.0767428
Cass4__chr2	0.0837068	0.0905004	1.08116	0.0802957
Rnf216__chr5	0.0969529	0.104817	1.08111	0.0923976
Cdkl5__chrX	0.0744033	0.0804381	1.08111	0.0716996
[truncated: 17,497 more rows]

## Sheet: Cluster 3
CLUSTER 3
GENEID	mean non cluster	mean cluster	fold change	p value
Rn45s__chr17	34.8891	294.783	8.44913	0
Lars2__chr9	0.768298	5.02738	6.54353	0.0001481
Mir5109__chr5	3.82887	20.7776	5.42655	8.64696e-10
Ttn__chr2	3.57727	8.85769	2.4761	0.0112027
Ryr2__chr13	0.40442	0.779824	1.92825	0.33268
Hrc__chr7	0.556485	1.05972	1.90431	0.107796
Clu__chr14	0.44917	0.81552	1.81562	0.36189
Cox6a2__chr7	1.88963	3.12719	1.65493	0.123504
Lpl__chr8	2.82176	4.37299	1.54974	0.155688
Fxyd1__chr7	0.404785	0.611846	1.51153	0.332923
Ptgds__chr2	0.386729	0.583113	1.50781	0.320766
Srl__chr16	0.334924	0.504568	1.50651	0.284643
Myl3__chr9	1.63461	2.43774	1.49133	0.225639
Mybpc3__chr2	0.729072	1.08333	1.4859	0.165985
Dst__chr1	0.33173	0.492294	1.48402	0.282354
Sspn__chr6	0.229059	0.339878	1.4838	0.204742
Dsp__chr13	0.295469	0.437917	1.4821	0.255849
Cmya5__chr13	0.246624	0.362542	1.47002	0.218591
Obscn__chr11	0.32811	0.481383	1.46714	0.279751
Atp1a2__chr1	0.612335	0.89731	1.46539	0.457981
Tcap__chr11	0.506943	0.740879	1.46146	0.39772
Casq2__chr3	0.655576	0.948144	1.44628	0.480925
Tmem38a__chr8	0.33038	0.47745	1.44516	0.281385
Atp1b1__chr1	0.212849	0.306522	1.44009	0.191744
Myh6__chr14	4.88869	7.00444	1.43278	0.121892
Pygm__chr19	0.406977	0.582986	1.43248	0.334384
Hfe2__chr3	0.222941	0.31697	1.42177	0.199861
Atp2a2__chr5	5.96178	8.47129	1.42093	0.148703
Smpd1__chr7	0.242198	0.343485	1.4182	0.215125
Actn2__chr13	0.370769	0.522885	1.41027	0.309836
2310014L17Rik__chr7	0.13718	0.191292	1.39445	0.128201
Ces1d__chr8	0.154379	0.213378	1.38217	0.143069
Txlnb__chr10	0.185709	0.255944	1.3782	0.169504
Trdn__chr10	0.303416	0.418128	1.37807	0.261741
Acaa2__chr18	0.340102	0.466423	1.37142	0.288339
Cryab__chr9	1.33427	1.82948	1.37114	0.385339
Tnni3__chr7	1.54786	2.10699	1.36122	0.20327
Eno3__chr11	0.43829	0.595675	1.35909	0.354908
Clasp1__chr1	0.215891	0.292858	1.35651	0.1942
Lrtm1__chr14	0.187564	0.254427	1.35648	0.171043
Dmd__chrX	0.147243	0.199637	1.35584	0.136931
Mb__chr15	4.25184	5.7605	1.35482	0.255349
Acta1__chr8	0.188967	0.253245	1.34015	0.172206
Pam__chr1	0.284151	0.379392	1.33518	0.247378
Mapt__chr11	0.148533	0.198173	1.3342	0.138044
Bsg__chr10	1.10719	1.47363	1.33097	0.303648
Prkaa2__chr4	0.140653	0.18704	1.3298	0.131223
Abcc9__chr6	0.180424	0.239734	1.32873	0.165103
Pdk2__chr11	0.199631	0.264138	1.32313	0.180988
Kcnk3__chr5	0.373821	0.494032	1.32157	0.31194
Golga4__chr9	0.287642	0.380098	1.32143	0.250001
Nbeal1__chr1	0.135631	0.179204	1.32126	0.126849
Tnnt2__chr1	3.74599	4.90617	1.30971	0.321717
Acsl1__chr8	0.201237	0.262261	1.30325	0.182303
Acadvl__chr11	0.241029	0.312908	1.29822	0.214207
Vldlr__chr19	0.211084	0.273708	1.29668	0.190316
Myom1__chr17	0.429015	0.553117	1.28927	0.348896
Ndufa1__chrX	0.416776	0.536017	1.28611	0.340876
Ckm__chr7	0.591883	0.75798	1.28063	0.446778
Cdh13__chr8	0.164701	0.210381	1.27735	0.15187
Cpe__chr8	0.251194	0.320353	1.27532	0.222155
Ndrg2__chr14	0.559407	0.709319	1.26798	0.428511
Etfb__chr7	0.300219	0.380455	1.26726	0.259376
Nceh1__chr3	0.268166	0.339173	1.26479	0.235247
Ech1__chr7	0.42723	0.539893	1.2637	0.347733
Rhox8__chrX	0.126613	0.159805	1.26214	0.118939
Cacna2d1__chr5	0.21156	0.266948	1.26181	0.190702
Gm5595__chr7	0.321699	0.405222	1.25963	0.275118
Slc2a4__chr11	0.221548	0.27826	1.25598	0.198746
Cdh2__chr18	0.227134	0.285273	1.25597	0.20321
Ndufa10__chr1	0.293374	0.367074	1.25122	0.254288
Myo18b__chr5	0.172743	0.216117	1.25109	0.158665
Usp13__chr3	0.157692	0.196471	1.24591	0.145904
Nrap__chr19	0.191755	0.23861	1.24435	0.174511
Sorbs1__chr19	0.3133	0.388713	1.24071	0.269003
Slc8a1__chr17	0.231901	0.286954	1.2374	0.207
Tmem201__chr4	0.162365	0.200045	1.23206	0.149886
Samd4__chr14	0.147306	0.181255	1.23047	0.136986
Fabp3__chr4	0.884946	1.08721	1.22856	0.22204
Ppp2r3a__chr9	0.182915	0.224659	1.22821	0.16718
Hadhb__chr5	0.496039	0.60854	1.2268	0.391115
Clybl__chr14	0.140089	0.171714	1.22575	0.130733
Uqcrc1__chr9	0.525001	0.643408	1.22554	0.408501
Ktn1__chr14	0.228398	0.279759	1.22487	0.204217
Dag1__chr9	0.244063	0.29871	1.22391	0.216588
Itga7__chr10	0.171892	0.209948	1.2214	0.157947
Art4__chr6	0.115042	0.140445	1.22082	0.108683
Limch1__chr5	0.186378	0.227508	1.22068	0.17006
Nol3__chr8	0.119906	0.146365	1.22066	0.113009
Myl2__chr5	3.15945	3.85617	1.22052	0.388528
Art5__chr7	0.112038	0.136645	1.21963	0.106001
Kdr__chr5	0.173768	0.21171	1.21835	0.159526
Adcy6__chr15	0.152339	0.185064	1.21482	0.141319
Syne2__chr12	0.15294	0.185514	1.21298	0.141835
Smyd1__chr6	0.174035	0.211027	1.21256	0.15975
Parm1__chr5	0.129587	0.157102	1.21233	0.121555
Akap6__chr12	0.147484	0.178702	1.21167	0.137139
Ldb3__chr14	0.310466	0.376071	1.21131	0.266928
Trabd2b__chr4	0.194816	0.235018	1.20636	0.177034
Fitm1__chr14	0.182882	0.219952	1.2027	0.167153
Reep1__chr6	0.112068	0.134663	1.20162	0.106028
Eef1a2__chr2	0.400602	0.481275	1.20138	0.330126
Ndufc2__chr7	0.367782	0.441621	1.20077	0.307772
Pdk4__chr6	0.208711	0.250326	1.19939	0.188392
Ppp1r3c__chr19	0.146556	0.175535	1.19773	0.136338
Myh11__chr16	0.140183	0.167629	1.19579	0.130815
Lmo7__chr14	0.176256	0.21065	1.19514	0.161615
Pde4a__chr9	0.146376	0.174787	1.1941	0.136182
Magi3__chr3	0.122594	0.146363	1.19389	0.11539
Bicd1__chr6	0.109112	0.130232	1.19357	0.103381
Serpinb2__chr1	0.114073	0.13608	1.19291	0.107819
Nexn__chr3	0.349942	0.417287	1.19245	0.295308
Pde4dip__chr3	0.3673	0.437651	1.19154	0.307437
Decr1__chr4	0.222136	0.264576	1.19106	0.199217
Cd59a__chr2	0.228721	0.272419	1.19106	0.204474
Myadml2__chr11	0.131111	0.156141	1.19091	0.122893
Mpc2__chr1	0.318114	0.378536	1.18994	0.272514
Lama5__chr2	0.147095	0.174718	1.18779	0.136803
Trim72__chr7	0.187902	0.222989	1.18673	0.171324
Alad__chr4	0.136635	0.162125	1.18655	0.127725
Hk2__chr6	0.218327	0.258976	1.18618	0.196161
Cacna1c__chr6	0.142109	0.168378	1.18485	0.132488
Hhatl__chr9	0.182134	0.215766	1.18465	0.16653
Ckmt2__chr13	0.496284	0.587513	1.18382	0.391264
Pcp4l1__chr1	0.185014	0.218683	1.18198	0.168926
Lpin1__chr12	0.164983	0.194978	1.18181	0.152109
Sucla2__chr14	0.281915	0.333101	1.18156	0.245693
Tmem245__chr4	0.12347	0.145762	1.18055	0.116164
Speg__chr1	0.209233	0.246777	1.17944	0.188816
Utrn__chr10	0.178261	0.210178	1.17904	0.163295
Ankrd28__chr14	0.121954	0.143636	1.17779	0.114823
Cap2__chr13	0.131739	0.155155	1.17775	0.123444
Ndufa11__chr17	0.311344	0.366445	1.17698	0.267571
Fbxl22__chr9	0.135872	0.15989	1.17677	0.12706
Bace1__chr9	0.124668	0.146637	1.17622	0.117223
Slc41a3__chr6	0.195964	0.229865	1.173	0.177979
Cers4__chr8	0.146091	0.171361	1.17297	0.135936
Sgcg__chr14	0.194256	0.227434	1.17079	0.176574
Idh2__chr7	0.402003	0.470654	1.17077	0.331064
Sema3b__chr9	0.1154	0.135095	1.17066	0.109002
Ldhb__chr6	0.543489	0.635976	1.17017	0.419339
Pgam2__chr11	0.24647	0.288362	1.16997	0.218471
Perp__chr10	0.140982	0.164895	1.16961	0.13151
Tmem8b__chr4	0.116619	0.136385	1.16949	0.110088
Popdc2__chr16	0.320507	0.374801	1.1694	0.274254
Pcdh7__chr5	0.166961	0.195127	1.1687	0.153785
Kcng2__chr18	0.161655	0.188871	1.16836	0.149282
Nnt__chr13	0.202337	0.236338	1.16804	0.183202
Ndufa9__chr6	0.238285	0.278305	1.16795	0.212047
Acss1__chr2	0.150349	0.175578	1.1678	0.139608
Slc16a1__chr3	0.174186	0.203404	1.16774	0.159877
Dusp27__chr1	0.115112	0.134367	1.16727	0.108746
Gsta4__chr9	0.129448	0.15106	1.16695	0.121433
Gaa__chr11	0.221546	0.258407	1.16638	0.198744
Ndufb5__chr3	0.408366	0.476178	1.16606	0.335308
Tacc2__chr7	0.16043	0.187034	1.16583	0.148239
Xirp2__chr2	0.527026	0.614228	1.16546	0.409698
Zfp106__chr2	0.364225	0.424367	1.16512	0.305304
B230120H23Rik__chr2	0.216727	0.252429	1.16473	0.194873
Trim54__chr5	0.151292	0.17621	1.1647	0.140419
Atl2__chr17	0.131955	0.153676	1.16461	0.123633
BC004004__chr17	0.2582	0.300624	1.16431	0.227586
Cirbp__chr10	0.139089	0.161893	1.16395	0.129864
Cidea__chr18	0.122854	0.142952	1.16359	0.11562
Fsd2__chr7	0.139186	0.161903	1.16321	0.129948
Mrrf__chr2	0.132171	0.153486	1.16126	0.123823
Hspb8__chr5	0.342674	0.397673	1.1605	0.290167
Rgs5__chr1	0.141232	0.163858	1.1602	0.131727
Pank1__chr19	0.125418	0.145503	1.16014	0.117885
Cd36__chr5	1.0004	1.16052	1.16006	0.264424
Ndufs3__chr2	0.336131	0.389864	1.15986	0.285507
Tmem246__chr4	0.144739	0.167859	1.15974	0.134767
Sgca__chr11	0.204729	0.237359	1.15938	0.185153
Glg1__chr8	0.228463	0.264858	1.15931	0.204268
Myh7__chr14	0.120566	0.139684	1.15857	0.113593
Gpc1__chr1	0.249734	0.289115	1.15769	0.221019
Fam174b__chr7	0.194699	0.225278	1.15706	0.176938
Atp5o__chr16	0.597569	0.691158	1.15662	0.449915
Cyc1__chr15	0.405923	0.469279	1.15608	0.333682
Asph__chr4	0.240004	0.277411	1.15586	0.213401
Glrx5__chr12	0.199783	0.230894	1.15573	0.181112
Ndufs7__chr10	0.28865	0.333465	1.15526	0.250756
4932438A13Rik__chr3	0.144969	0.167387	1.15464	0.134966
Pgm5__chr19	0.130413	0.150573	1.15459	0.12228
Lynx1__chr15	0.153778	0.177539	1.15452	0.142553
C030006K11Rik__chr15	0.128421	0.148035	1.15273	0.12053
Klhl31__chr9	0.160438	0.184909	1.15253	0.148246
Rpl10l__chr12	0.114776	0.132192	1.15174	0.108446
Atp5s__chr12	0.116485	0.133937	1.14983	0.109968
Synpo__chr18	0.184295	0.21178	1.14914	0.168329
Cisd1__chr10	0.262883	0.301952	1.14862	0.231196
Ndufb7__chr8	0.290272	0.333235	1.14801	0.251971
Sptbn1__chr11	0.625945	0.71794	1.14697	0.46531
Abi2__chr1	0.129304	0.148287	1.14681	0.121307
Dgat2__chr7	0.221633	0.254086	1.14643	0.198814
Slc25a4__chr8	2.94652	3.37768	1.14633	0.340847
Afg3l2__chr18	0.167949	0.192494	1.14615	0.15462
Lamb2__chr9	0.296215	0.339385	1.14574	0.256404
Clip4__chr17	0.155905	0.178556	1.14528	0.144376
Ccdc141__chr2	0.119539	0.136859	1.1449	0.112682
Prickle1__chr15	0.118059	0.135065	1.14405	0.111368
1190002N15Rik__chr9	0.14827	0.169595	1.14383	0.137817
Mfn2__chr4	0.35886	0.410391	1.1436	0.301567
Zfp46__chr4	0.130695	0.1494	1.14312	0.122528
Zrsr1__chr11	0.135053	0.154328	1.14272	0.126344
Ank2__chr3	0.123243	0.140824	1.14265	0.115964
Ghr__chr15	0.156091	0.178292	1.14223	0.144535
Bves__chr10	0.12126	0.138505	1.14221	0.114209
Macf1__chr4	0.298427	0.340789	1.14195	0.258047
Lman2l__chr1	0.124706	0.142252	1.1407	0.117257
Csrp3__chr7	0.428255	0.488473	1.14061	0.3484
Nfib__chr4	0.395102	0.450422	1.14001	0.326431
Vps13a__chr19	0.123873	0.141101	1.13907	0.116521
Mylk3__chr8	0.173487	0.197467	1.13823	0.15929
Rrad__chr8	0.138854	0.157983	1.13776	0.12966
Snx11__chr11	0.12438	0.141437	1.13714	0.116968
Prickle2__chr6	0.117569	0.13364	1.13669	0.110933
Sdhb__chr4	0.405002	0.460334	1.13662	0.333068
Fhod3__chr18	0.17131	0.194678	1.1364	0.157458
Dysf__chr6	0.158746	0.180376	1.13626	0.146803
Stk39__chr2	0.177023	0.201101	1.13602	0.162258
Pm20d2__chr4	0.141987	0.161295	1.13598	0.132382
Tufm__chr7	0.183592	0.208514	1.13574	0.167744
Akap9__chr5	0.158493	0.179983	1.13559	0.146587
Tcta__chr9	0.136793	0.155274	1.13511	0.127863
Scarb2__chr5	0.201349	0.228518	1.13493	0.182394
Tecr__chr8	0.650334	0.737025	1.1333	0.478197
Got2__chr8	0.373871	0.423539	1.13285	0.311975
Slc47a1__chr11	0.119862	0.135779	1.1328	0.112969
Abcg2__chr6	0.143735	0.162805	1.13267	0.133898
Cox4i1__chr8	1.00266	1.13521	1.13219	0.265257
Art3__chr5	0.194261	0.219898	1.13197	0.176577
Lclat1__chr17	0.147743	0.167167	1.13148	0.137362
Mllt6__chr11	0.149123	0.168698	1.13127	0.138552
Atp5a1__chr18	1.26116	1.4252	1.13007	0.359419
Smyd2__chr1	0.177159	0.20017	1.12989	0.162372
Hint2__chr4	0.15544	0.175465	1.12883	0.143977
Fbxo32__chr15	0.147537	0.16653	1.12874	0.137184
Tmem147__chr7	0.244175	0.275548	1.12849	0.216675
Kpna1__chr16	0.13026	0.146935	1.12801	0.122146
Hspb6__chr7	0.472647	0.533138	1.12798	0.376701
Sprr1a__chr3	0.151264	0.170552	1.12751	0.140395
Tnnc1__chr14	0.584814	0.658924	1.12672	0.442852
Sun2__chr15	0.163573	0.18429	1.12665	0.150912
Myh14__chr7	0.128956	0.145232	1.12622	0.121
Eci1__chr17	0.268219	0.30199	1.12591	0.235288
Sobp__chr10	0.12686	0.142759	1.12533	0.119156
Acot2__chr12	0.138811	0.156132	1.12478	0.129621
Mrpl16__chr19	0.145224	0.163276	1.12431	0.135186
B3gnt1__chr19	0.138256	0.155436	1.12427	0.129138
Ndufa13__chr8	0.392182	0.440745	1.12383	0.324461
Mll3__chr5	0.172494	0.193794	1.12348	0.158455
Myl9__chr2	0.143603	0.161276	1.12307	0.133784
Gm20594__chr6	0.116388	0.1307	1.12297	0.109882
Acadl__chr1	0.504196	0.566099	1.12278	0.396063
Pxmp2__chr5	0.154678	0.173471	1.12149	0.143325
Murc__chr4	0.124221	0.139267	1.12112	0.116828
Lgr4__chr2	0.11691	0.130939	1.12	0.110347
Palld__chr8	0.122454	0.137103	1.11963	0.115266
Ndufb10__chr17	0.332291	0.372039	1.11962	0.282757
Hspb2__chr9	0.129259	0.144663	1.11917	0.121267
Rilp__chr11	0.120695	0.135055	1.11897	0.113709
Prkar2a__chr9	0.138925	0.155367	1.11835	0.129721
Dlst__chr12	0.264449	0.295736	1.11831	0.232399
Ndufa4__chr6	0.490785	0.548674	1.11795	0.387907
Cxcl12__chr6	0.304792	0.340592	1.11746	0.262756
Ankrd11__chr8	0.194954	0.217815	1.11726	0.177148
Zbtb38__chr9	0.115694	0.129228	1.11698	0.109264
Cav3__chr6	0.133669	0.149254	1.11659	0.125134
Iffo2__chr4	0.138758	0.154877	1.11617	0.129576
Ipo7__chr7	0.111687	0.124584	1.11547	0.105688
Hmg20b__chr10	0.156022	0.174027	1.11541	0.144475
Ogdh__chr11	0.658751	0.734716	1.11532	0.482572
Galt__chr4	0.130486	0.145477	1.11489	0.122345
Grm1__chr10	0.122047	0.136057	1.1148	0.114906
Ift172__chr5	0.115336	0.128567	1.11471	0.108945
Yipf7__chr5	0.151496	0.168797	1.1142	0.140594
Ptprb__chr10	0.251123	0.279762	1.11404	0.2221
Fnbp1l__chr3	0.130107	0.144878	1.11353	0.122012
Tbc1d16__chr11	0.134217	0.149418	1.11325	0.125614
Slc7a14__chr3	0.144809	0.161186	1.11309	0.134827
Nsg1__chr5	0.120605	0.134207	1.11278	0.113628
Ptpn14__chr1	0.124073	0.138062	1.11275	0.116698
Ppa2__chr3	0.145966	0.162393	1.11254	0.135828
Slc4a3__chr1	0.205241	0.228338	1.11254	0.185571
Ptpn4__chr1	0.111108	0.123592	1.11236	0.105169
Idh3g__chrX	0.272865	0.303254	1.11137	0.238834
Ndufab1__chr7	0.397891	0.442104	1.11112	0.328308
Tmem223__chr19	0.145287	0.161428	1.1111	0.135241
Ttll1__chr15	0.123743	0.137465	1.11089	0.116406
Fyco1__chr9	0.208608	0.231676	1.11058	0.188309
Mcat__chr15	0.126731	0.140742	1.11056	0.119042
Acacb__chr5	0.147125	0.163275	1.10977	0.136829
Slc36a2__chr11	0.11921	0.132256	1.10943	0.112391
Ank__chr15	0.183683	0.203705	1.109	0.16782
Lsmem1__chr12	0.118355	0.131213	1.10864	0.111631
Sptb__chr12	0.134898	0.149524	1.10843	0.126208
Atf6__chr1	0.187642	0.207968	1.10832	0.171108
Tmem161a__chr8	0.163171	0.180845	1.10831	0.150571
Art1__chr7	0.186225	0.20639	1.10828	0.169933
Tnni3k__chr3	0.1377	0.152568	1.10798	0.128654
Mef2a__chr7	0.136034	0.150695	1.10777	0.127201
Ick__chr9	0.125352	0.138851	1.10769	0.117826
Ivd__chr2	0.146643	0.162401	1.10746	0.136413
Tmem66__chr8	0.349442	0.386964	1.10738	0.294956
Lrp6__chr6	0.220269	0.243883	1.1072	0.19772
Prc1__chr7	0.157192	0.173999	1.10692	0.145476
Pcyt2__chr11	0.133295	0.147512	1.10666	0.124807
Actc1__chr2	4.42346	4.89506	1.10661	0.453449
Myh7b__chr2	0.122062	0.13502	1.10616	0.114919
Tmx4__chr2	0.152542	0.168714	1.10602	0.141493
Gpr137__chr19	0.13828	0.152931	1.10595	0.12916
Aamdc__chr7	0.136134	0.150545	1.10586	0.127288
Tmem205__chr9	0.150708	0.166634	1.10567	0.139917
Car14__chr3	0.119999	0.132668	1.10558	0.113091
Pbxip1__chr3	0.252444	0.279039	1.10535	0.223127
Oxct1__chr15	0.546525	0.603806	1.10481	0.4211
Cluh__chr11	0.181596	0.200604	1.10467	0.166081
Ptpn11__chr5	0.232199	0.256465	1.1045	0.207237
Zfp846__chr9	0.111387	0.122982	1.1041	0.105419
Mlxipl__chr5	0.127622	0.140867	1.10378	0.119827
Mical3__chr6	0.126396	0.139507	1.10373	0.118747
Adrb1__chr19	0.117148	0.129284	1.10359	0.110558
Large__chr8	0.132333	0.146009	1.10334	0.123965
Ndufa5__chr6	0.309364	0.341205	1.10292	0.266119
Zfp771__chr7	0.137588	0.151722	1.10272	0.128557
Lyrm7__chr11	0.117216	0.129253	1.10269	0.110619
Ptprg__chr14	0.154225	0.169971	1.1021	0.142937
Insr__chr8	0.141516	0.155959	1.10206	0.131973
Hadha__chr5	0.340844	0.375536	1.10178	0.288867
Gpc6__chr14	0.150625	0.165943	1.1017	0.139845
Zfp810__chr9	0.114743	0.126333	1.10102	0.108416
Tmem63b__chr17	0.151448	0.166715	1.1008	0.140553
Dhrs7c__chr11	0.141393	0.155574	1.10029	0.131867
Mecom__chr3	0.135284	0.148723	1.09934	0.126546
Clip1__chr5	0.153359	0.168578	1.09924	0.142194
Chpt1__chr10	0.191441	0.210433	1.0992	0.174252
Xrn1__chr9	0.119119	0.130931	1.09917	0.11231
Prkca__chr11	0.122588	0.134739	1.09912	0.115384
N6amt1__chr16	0.127503	0.140085	1.09868	0.119722
Them4__chr3	0.115514	0.126912	1.09868	0.109104
Dlc1__chr8	0.169673	0.186394	1.09855	0.156077
Qrsl1__chr10	0.121009	0.132915	1.09839	0.113986
Rbfox1__chr16	0.136007	0.149388	1.09838	0.127178
Rev3l__chr10	0.136418	0.149823	1.09826	0.127537
Ank3__chr10	0.132566	0.145525	1.09775	0.124169
Slc4a4__chr5	0.118884	0.130499	1.0977	0.112101
Rnf214__chr9	0.119541	0.131213	1.09764	0.112685
Asb10__chr5	0.122356	0.13428	1.09745	0.115179
Retsat__chr6	0.124267	0.136375	1.09744	0.116869
Ephx2__chr14	0.176624	0.193795	1.09722	0.161924
Adck3__chr1	0.185812	0.203875	1.09721	0.16959
Ncdn__chr4	0.138903	0.152401	1.09717	0.129702
Pcca__chr14	0.135144	0.148276	1.09717	0.126424
Fez2__chr17	0.17447	0.191352	1.09676	0.160116
Yif1a__chr19	0.17715	0.194222	1.09637	0.162365
Slc38a3__chr9	0.134518	0.147424	1.09594	0.125877
1700021F05Rik__chr10	0.146361	0.160345	1.09554	0.136169
B3galt2__chr1	0.107953	0.118267	1.09554	0.102342
Clock__chr5	0.124474	0.136366	1.09553	0.117052
Apmap__chr2	0.139127	0.152379	1.09525	0.129896
Atp5b__chr10	1.60267	1.75516	1.09514	0.476032
Nek9__chr12	0.177464	0.194309	1.09492	0.162627
Sord__chr2	0.18293	0.200287	1.09488	0.167193
Bcam__chr7	0.27489	0.300947	1.09479	0.240373
Malat1__chr19	4.65243	5.09283	1.09466	0.32334
Kcnj2__chr11	0.141471	0.154861	1.09465	0.131934
Map3k5__chr10	0.13933	0.152497	1.09451	0.130073
Adcy5__chr16	0.118636	0.129846	1.0945	0.111881
Gbe1__chr16	0.136683	0.149587	1.09441	0.127768
Enah__chr1	0.124603	0.136362	1.09437	0.117166
Pigo__chr4	0.117224	0.128268	1.09421	0.110626
Hrasls__chr16	0.112221	0.122782	1.09411	0.106165
Pkp4__chr2	0.172997	0.189254	1.09398	0.158878
Arhgef10l__chr4	0.139285	0.152353	1.09382	0.130035
Fbxw5__chr2	0.146081	0.159764	1.09367	0.135928
Efnb1__chrX	0.140172	0.153267	1.09342	0.130806
Dbt__chr3	0.143541	0.156947	1.09339	0.13373
Aco2__chr15	0.641722	0.700698	1.0919	0.473682
Clic5__chr17	0.207543	0.226601	1.09182	0.187444
Ptgfrn__chr3	0.220624	0.240853	1.09169	0.198005
Spint2__chr7	0.119088	0.129964	1.09133	0.112283
Rpl3l__chr17	0.18044	0.19691	1.09128	0.165116
Asb2__chr12	0.164852	0.179894	1.09125	0.151998
Ak1__chr2	0.292636	0.319208	1.0908	0.253738
Abcf2__chr5	0.148272	0.161716	1.09067	0.137818
Slc25a11__chr11	0.28168	0.307128	1.09034	0.245515
Cox7a1__chr7	0.317867	0.346508	1.0901	0.272335
Setd5__chr6	0.141268	0.153978	1.08997	0.131758
Fto__chr8	0.164469	0.179241	1.08982	0.151673
Smcr7__chr11	0.121001	0.131809	1.08932	0.113979
Ccdc47__chr11	0.2062	0.224517	1.08883	0.186352
Clec1a__chr6	0.126468	0.137689	1.08872	0.118811
Vps13c__chr9	0.126274	0.137475	1.08871	0.11864
Arhgap29__chr3	0.166004	0.180729	1.0887	0.152975
Phyhd1__chr2	0.135952	0.148003	1.08864	0.12713
Etl4__chr2	0.141327	0.1538	1.08825	0.131809
Cnot4__chr6	0.142193	0.154724	1.08813	0.132561
Irgq__chr7	0.11983	0.13039	1.08813	0.112941
Uqcc__chr2	0.146564	0.159434	1.08781	0.136345
Tmtc2__chr10	0.11187	0.12167	1.0876	0.105851
Timm22__chr11	0.137794	0.14986	1.08756	0.128737
Itfg2__chr6	0.117308	0.127546	1.08728	0.110701
Crip2__chr12	0.723594	0.786741	1.08727	0.484932
Klf3__chr5	0.147897	0.16073	1.08677	0.137495
Pde3a__chr6	0.108202	0.117555	1.08644	0.102565
Plin4__chr17	0.120151	0.130535	1.08642	0.113226
Gata2__chr6	0.134865	0.1465	1.08627	0.12618
Acad11__chr9	0.13289	0.144349	1.08623	0.124452
Zmym3__chrX	0.125316	0.136116	1.08618	0.117795
2410015M20Rik__chr17	0.17624	0.191425	1.08616	0.161602
Macrod1__chr19	0.174285	0.189231	1.08576	0.15996
Gm6981__chr9	0.110974	0.120487	1.08572	0.105049
Arvcf__chr16	0.109632	0.119006	1.0855	0.103847
Mrps7__chr11	0.159022	0.172617	1.08549	0.147039
Mfsd3__chr15	0.113621	0.123306	1.08524	0.107415
Scn5a__chr9	0.190002	0.206135	1.08491	0.173063
Npr3__chr15	0.117239	0.127185	1.08484	0.110639
Usp20__chr2	0.119354	0.129478	1.08482	0.112519
Thnsl1__chr2	0.109242	0.118504	1.08479	0.103497
Gtf2i__chr5	0.193314	0.209682	1.08467	0.175797
Myocd__chr11	0.115528	0.125304	1.08462	0.109116
Immt__chr6	0.248339	0.269339	1.08456	0.219931
Net1__chr13	0.121495	0.131755	1.08445	0.114417
Rbm20__chr19	0.134646	0.145994	1.08428	0.125989
Sorbs2__chr8	0.191404	0.20752	1.0842	0.174221
Mdk__chr2	0.126834	0.137511	1.08418	0.119133
Txlng__chrX	0.117691	0.127578	1.08401	0.111041
Alpk3__chr7	0.128696	0.139462	1.08366	0.120772
Dld__chr12	0.192575	0.208678	1.08362	0.175188
Ube2c__chr2	0.172091	0.186447	1.08342	0.158115
1110001J03Rik__chr6	0.148779	0.161187	1.0834	0.138256
3632451O06Rik__chr14	0.111148	0.120408	1.08331	0.105205
Wnk2__chr13	0.11723	0.126975	1.08313	0.110631
Rc3h2__chr2	0.146153	0.158298	1.0831	0.13599
Bod1__chr11	0.163678	0.177266	1.08302	0.151002
Itga6__chr2	0.149533	0.161908	1.08276	0.138906
AU040320__chr4	0.146215	0.158312	1.08274	0.136043
Clpb__chr7	0.141194	0.152856	1.0826	0.131694
Asb14__chr14	0.124058	0.134296	1.08253	0.116684
Pmpcb__chr5	0.178594	0.193289	1.08228	0.163573
Slc20a2__chr8	0.163097	0.176466	1.08197	0.150508
Mylk4__chr13	0.139202	0.150603	1.0819	0.129962
Syt7__chr19	0.137856	0.149143	1.08188	0.12879
Magi1__chr6	0.116318	0.125831	1.08179	0.109819
Cyp26b1__chr6	0.114852	0.124244	1.08178	0.108513
Alox12__chr11	0.116234	0.125738	1.08177	0.109745
Nebl__chr2	0.117494	0.127057	1.08139	0.110866
Inpp5k__chr11	0.135589	0.146569	1.08098	0.126813
2410004B18Rik__chr3	0.122317	0.132206	1.08085	0.115145
Ankrd32__chr13	0.120175	0.129882	1.08078	0.113247
Cpxm2__chr7	0.120926	0.13068	1.08066	0.113913
BC052688__chr13	0.111226	0.120185	1.08055	0.105275
Dsg2__chr18	0.138054	0.149174	1.08054	0.128963
Ablim1__chr19	0.234292	0.253162	1.08054	0.208894
Ndufa3__chr7	0.370757	0.400539	1.08033	0.309828
Apof__chr10	0.111488	0.120438	1.08028	0.105509
Ppara__chr15	0.13302	0.143687	1.08019	0.124566
Cngb3__chr4	0.108616	0.117324	1.08017	0.102937
Dusp8__chr7	0.12557	0.135624	1.08006	0.118019
Nbr1__chr11	0.171285	0.184972	1.07991	0.157437
Cyyr1__chr16	0.110486	0.119312	1.07988	0.104613
Fbxo3__chr2	0.143733	0.155207	1.07983	0.133896
Gbp2__chr3	0.128863	0.139128	1.07967	0.120918
Tex261__chr6	0.172011	0.185714	1.07966	0.158048
Nr2f1__chr13	0.111897	0.120811	1.07966	0.105875
Alkbh7__chr17	0.133224	0.143829	1.0796	0.124744
Cdk5rap3__chr11	0.131757	0.142212	1.07935	0.12346
Tln2__chr9	0.139837	0.150931	1.07934	0.130514
Lpcat3__chr6	0.160845	0.173604	1.07933	0.148592
Dlat__chr9	0.208091	0.224571	1.0792	0.187889
Arhgap5__chr12	0.15179	0.163796	1.07909	0.140847
Lpar6__chr14	0.145192	0.156653	1.07894	0.135159
Nhlrc1__chr13	0.108097	0.116604	1.0787	0.10247
Wfs1__chr5	0.173224	0.186791	1.07832	0.159069
Igfals__chr17	0.109572	0.118119	1.07801	0.103793
Fign__chr2	0.117485	0.126639	1.07792	0.110858
Akr7a5__chr4	0.132846	0.143182	1.0778	0.124414
Zc3h13__chr14	0.156104	0.168225	1.07765	0.144546
Prpf40a__chr2	0.172781	0.18616	1.07743	0.158696
Rasl10b__chr11	0.124701	0.134342	1.07731	0.117252
Myo18a__chr11	0.203971	0.219716	1.0772	0.184535
Gdpd5__chr7	0.122945	0.13239	1.07682	0.1157
Ddr1__chr17	0.116735	0.125701	1.07681	0.110191
Phrf1__chr7	0.127752	0.137522	1.07647	0.119942
Coq5__chr5	0.149454	0.16087	1.07638	0.138838
Hus1__chr11	0.114931	0.123695	1.07625	0.108584
Aldh6a1__chr12	0.13328	0.143419	1.07608	0.124793
Lnpep__chr17	0.130313	0.140213	1.07598	0.122193
Efcab2__chr1	0.114335	0.123001	1.07579	0.108053
Paqr9__chr9	0.118522	0.127463	1.07544	0.11178
Smg8__chr11	0.116785	0.125585	1.07535	0.110235
Amigo1__chr3	0.116716	0.125488	1.07515	0.110175
Trip11__chr12	0.130396	0.14017	1.07495	0.122266
Auts2__chr5	0.120069	0.129033	1.07466	0.113153
Eml1__chr12	0.140012	0.150459	1.07462	0.130667
Bche__chr3	0.11072	0.118976	1.07456	0.104822
Ash1l__chr3	0.185441	0.199122	1.07378	0.169281
Xpc__chr6	0.114145	0.122566	1.07377	0.107883
Rdm1__chr11	0.117582	0.126244	1.07366	0.110945
Tspan7__chrX	0.254921	0.273605	1.07329	0.225049
Rilpl1__chr5	0.162593	0.174499	1.07322	0.15008
Gab1__chr8	0.145771	0.156373	1.07273	0.135659
Sco1__chr11	0.119511	0.128203	1.07272	0.112658
Arhgef19__chr4	0.111475	0.119579	1.0727	0.105498
Phka1__chrX	0.118319	0.126901	1.07253	0.1116
Hspa4l__chr3	0.12228	0.131129	1.07237	0.115112
Sema4b__chr7	0.117252	0.125705	1.0721	0.110651
Tmem234__chr4	0.1491	0.159845	1.07207	0.138532
Sirt3__chr7	0.114898	0.123151	1.07183	0.108555
Wasf2__chr4	0.129872	0.139166	1.07156	0.121806
Ndufb11__chrX	0.394148	0.422353	1.07156	0.325788
BC005561__chr5	0.133879	0.143439	1.07141	0.125318
Alpk2__chr18	0.125477	0.134422	1.07128	0.117937
3425401B19Rik__chr14	0.125442	0.134374	1.0712	0.117906
Pitpnm2__chr5	0.1589	0.170192	1.07106	0.146935
Nfkbib__chr7	0.132697	0.142125	1.07105	0.124284
Ndufv1__chr19	0.321145	0.343855	1.07072	0.274716
Dcun1d2__chr8	0.123492	0.132198	1.0705	0.116184
Hells__chr19	0.121507	0.130053	1.07034	0.114427
Ttc3__chr16	0.200049	0.214119	1.07033	0.18133
Cand2__chr6	0.141392	0.151313	1.07016	0.131866
Mettl22__chr16	0.114369	0.122347	1.06975	0.108083
Plxdc2__chr2	0.132938	0.142203	1.06969	0.124495
Slmap__chr14	0.170331	0.182199	1.06968	0.156632
Zfpm1__chr8	0.126528	0.135334	1.0696	0.118863
Lmod2__chr6	0.165226	0.17672	1.06957	0.152315
Insig1__chr5	0.125936	0.134667	1.06933	0.118342
Kcnd2__chr6	0.112818	0.120632	1.06926	0.106698
Bag3__chr7	0.195457	0.20899	1.06924	0.177562
Gatsl3__chr11	0.113025	0.120834	1.0691	0.106883
Qser1__chr2	0.140255	0.149913	1.06886	0.130878
St3gal3__chr4	0.12486	0.133449	1.06879	0.117392
Nfix__chr8	0.243982	0.260752	1.06874	0.216524
Opa3__chr7	0.129622	0.13852	1.06865	0.121586
Ltbp1__chr17	0.150152	0.160419	1.06837	0.139438
Adprhl1__chr8	0.257995	0.275598	1.06823	0.227428
Arsk__chr13	0.115081	0.122904	1.06798	0.108718
Osbpl1a__chr18	0.13537	0.14455	1.06782	0.126621
Ncald__chr15	0.1114	0.11895	1.06778	0.10543
Wfdc1__chr8	0.118729	0.126776	1.06777	0.111964
Rgma__chr7	0.120954	0.129147	1.06773	0.113938
Chchd10__chr10	0.366879	0.391721	1.06771	0.307146
Higd1b__chr11	0.109269	0.116668	1.06771	0.103522
Zc2hc1c__chr12	0.10722	0.114454	1.06746	0.101683
Mtmr4__chr11	0.118195	0.126168	1.06745	0.11149
Clpx__chr9	0.130973	0.139785	1.06728	0.122772
Nkx2-5__chr17	0.130914	0.139714	1.06722	0.12272
Taf1a__chr1	0.125137	0.13354	1.06715	0.117637
Daam1__chr12	0.136903	0.146095	1.06715	0.127959
Hspb1__chr5	0.45425	0.484718	1.06707	0.365125
Zfp945__chr17	0.124185	0.132513	1.06706	0.116796
Atp9a__chr2	0.133247	0.142173	1.06699	0.124765
Rxrg__chr1	0.12379	0.132061	1.06682	0.116447
Ccdc122__chr14	0.111156	0.118574	1.06673	0.105213
Dennd6b__chr15	0.110289	0.117644	1.06668	0.104436
Dact3__chr7	0.116155	0.123879	1.0665	0.109674
Rab4a__chr8	0.108477	0.11569	1.06649	0.102811
Mrps22__chr9	0.124777	0.13307	1.06646	0.117319
Cytl1__chr5	0.112147	0.119597	1.06643	0.106099
Atp5g3__chr2	1.34295	1.43189	1.06623	0.388385
Smpx__chrX	0.242563	0.258611	1.06616	0.215411
Plxna4__chr6	0.115556	0.123196	1.06612	0.109141
Dusp18__chr11	0.124732	0.132958	1.06594	0.11728
Opa1__chr16	0.154181	0.164306	1.06567	0.142899
2200002D01Rik__chr7	0.116237	0.123856	1.06555	0.109747
Rabac1__chr7	0.316147	0.336852	1.06549	0.271081
Nrip1__chr16	0.120952	0.12887	1.06546	0.113936
Mtif3__chr5	0.120251	0.128117	1.06541	0.113314
Slc41a1__chr1	0.125321	0.133508	1.06533	0.117799
Mgmt__chr7	0.111781	0.119082	1.06532	0.105771
Zfp532__chr18	0.122056	0.129977	1.0649	0.114913
Jmjd8__chr17	0.126055	0.134236	1.0649	0.118447
Nlrx1__chr9	0.124733	0.132805	1.06471	0.11728
Acss2__chr2	0.114592	0.122007	1.06471	0.108282
Gys1__chr7	0.155668	0.165741	1.06471	0.144173
Optn__chr2	0.131492	0.139999	1.06469	0.123227
Nol8__chr13	0.13389	0.142496	1.06428	0.125328
Pard3b__chr1	0.116569	0.124056	1.06423	0.110043
Tfam__chr10	0.141162	0.150211	1.0641	0.131666
Egf__chr3	0.107816	0.114725	1.06408	0.102218
Ranbp2__chr10	0.150884	0.160533	1.06395	0.140069
D830015G02Rik__chr14	0.287683	0.306051	1.06385	0.250031
Mllt3__chr4	0.121204	0.128928	1.06373	0.11416
G6pc3__chr11	0.142936	0.152005	1.06344	0.133206
9930104L06Rik__chr4	0.116737	0.124137	1.06338	0.110193
Txndc16__chr14	0.114887	0.122155	1.06326	0.108545
Zcchc11__chr4	0.132582	0.14096	1.06319	0.124183
Scd4__chr19	0.116821	0.124166	1.06287	0.110267
Zbtb40__chr4	0.114172	0.121346	1.06284	0.107907
Arhgef9__chrX	0.112227	0.119278	1.06283	0.10617
Ppfibp2__chr7	0.117243	0.124608	1.06282	0.110643
2610008E11Rik__chr10	0.116497	0.123807	1.06274	0.10998
Unkl__chr17	0.112059	0.119062	1.06249	0.10602
Gbas__chr5	0.317976	0.337834	1.06245	0.272414
Fzd3__chr14	0.112672	0.119699	1.06236	0.106568
Il11ra1__chr4	0.121136	0.12868	1.06228	0.114099
Nadkd1__chr15	0.133075	0.141364	1.06228	0.124615
Arid5b__chr10	0.125781	0.133613	1.06226	0.118205
Sdr39u1__chr14	0.160689	0.170629	1.06186	0.14846
Dnaja3__chr16	0.183402	0.194743	1.06184	0.167586
2510049J12Rik__chr6	0.107904	0.114561	1.0617	0.102297
Tbl2__chr5	0.117949	0.125216	1.06161	0.111271
Ndufv2__chr17	0.350178	0.371745	1.06159	0.295475
S100a1__chr3	0.402046	0.426796	1.06156	0.331093
Trim21__chr7	0.117865	0.125116	1.06152	0.111196
Zc3h4__chr7	0.14865	0.157762	1.0613	0.138145
Mir143hg__chr18	0.111575	0.1184	1.06117	0.105587
Ndufb2__chr6	0.253424	0.268921	1.06115	0.223888
Ilvbl__chr10	0.130451	0.138427	1.06114	0.122314
Mov10l1__chr15	0.125041	0.132676	1.06105	0.117553
Spin1__chr13	0.157923	0.167551	1.06097	0.146101
Srrm4__chr5	0.108379	0.114986	1.06096	0.102724
Smc5__chr19	0.145759	0.154605	1.06069	0.135649
Plxna2__chr1	0.141935	0.150549	1.06068	0.132337
Pank4__chr4	0.122924	0.130381	1.06067	0.115681
Sh2d5__chr4	0.121675	0.129043	1.06056	0.114576
Rai2__chrX	0.11264	0.119461	1.06055	0.10654
Camk2n1__chr4	0.136717	0.144993	1.06054	0.127797
Rpph1__chr14	0.108618	0.115193	1.06053	0.102938
Cntln__chr4	0.119908	0.127139	1.06031	0.11301
Tgfbr3__chr5	0.14028	0.148738	1.06029	0.1309
Spag9__chr11	0.218065	0.231209	1.06027	0.19595
Mpp7__chr18	0.115197	0.122135	1.06023	0.108821
Phtf2__chr5	0.135674	0.143824	1.06007	0.126887
Tmem41a__chr16	0.120175	0.127388	1.06001	0.113247
Ctsf__chr19	0.12384	0.131271	1.06001	0.116491
Rpp40__chr13	0.11783	0.124891	1.05993	0.111165
Hopx__chr5	0.254853	0.270117	1.05989	0.224997
Prpf4b__chr13	0.158823	0.168332	1.05987	0.146869
Lmf1__chr17	0.131527	0.13939	1.05978	0.123258
Snapc3__chr4	0.118673	0.125742	1.05957	0.111914
1500012F01Rik__chr2	0.152067	0.161121	1.05954	0.141085
1110012L19Rik__chrX	0.119333	0.126418	1.05938	0.1125
Vprbp__chr9	0.120869	0.128037	1.0593	0.113863
Exoc3__chr13	0.164564	0.174271	1.05899	0.151753
Abca3__chr17	0.112233	0.118848	1.05894	0.106176
Fam161b__chr12	0.112765	0.119409	1.05892	0.106651
Tet2__chr3	0.122554	0.129769	1.05887	0.115355
Uty__chrY	0.119542	0.126576	1.05884	0.112686
Arid4b__chr13	0.156347	0.165544	1.05882	0.144754
Dip2c__chr13	0.124665	0.13199	1.05876	0.11722
2810008D09Rik__chr11	0.118721	0.125695	1.05874	0.111957
Pde7a__chr3	0.115109	0.121865	1.0587	0.108743
Tmem132a__chr19	0.115413	0.122168	1.05853	0.109013
Snx14__chr9	0.123565	0.130783	1.05842	0.116248
Zfp644__chr5	0.137783	0.145821	1.05834	0.128726
Uqcrc2__chr7	0.391567	0.414408	1.05833	0.324045
Ppp1r13b__chr12	0.12882	0.136326	1.05827	0.120881
Gabra6__chr11	0.107012	0.113245	1.05825	0.101496
Zbtb16__chr9	0.116073	0.122833	1.05824	0.109602
Lrrk1__chr7	0.126152	0.133496	1.05822	0.118532
Itpkb__chr1	0.111494	0.117978	1.05815	0.105515
Troap__chr15	0.11604	0.12278	1.05808	0.109573
Hccs__chrX	0.137965	0.145974	1.05805	0.128885
Fam5c__chr1	0.106979	0.113183	1.05799	0.101467
Tbxa2r__chr10	0.114826	0.121484	1.05798	0.10849
Gpr155__chr2	0.113226	0.119789	1.05796	0.107063
Rest__chr5	0.130364	0.137916	1.05792	0.122238
Lnp__chr2	0.131644	0.139264	1.05788	0.123361
Rnf128__chrX	0.206994	0.218972	1.05787	0.186997
Klhdc8a__chr1	0.114283	0.120885	1.05777	0.108007
Rnf31__chr14	0.12174	0.128768	1.05773	0.114634
Actr10__chr12	0.188546	0.199428	1.05772	0.171857
Gpr157__chr4	0.122766	0.129851	1.05771	0.115542
Pop1__chr15	0.117408	0.124181	1.05768	0.11079
Mrps9__chr1	0.144717	0.153064	1.05768	0.134748
Rtn2__chr7	0.147282	0.155771	1.05764	0.136965
Fn3k__chr11	0.114702	0.121312	1.05763	0.10838
Ubr4__chr4	0.207044	0.218965	1.05758	0.187038
Fgfrl1__chr5	0.116475	0.12318	1.05757	0.10996
Trak2__chr1	0.20294	0.21461	1.05751	0.183694
Pcsk5__chr19	0.117361	0.124105	1.05746	0.110748
Zranb2__chr3	0.17729	0.187461	1.05737	0.162482
Zdhhc17__chr10	0.126126	0.133347	1.05725	0.11851
Pik3r1__chr13	0.150863	0.159492	1.05719	0.14005
Heatr5b__chr17	0.128307	0.135636	1.05712	0.12043
Zkscan6__chr11	0.112739	0.119161	1.05696	0.106628
Smok2b__chr17	0.107143	0.113245	1.05695	0.101614
Rnaseh2a__chr8	0.128992	0.136338	1.05695	0.121032
Tmem41b__chr7	0.152864	0.161568	1.05694	0.141769
Zfyve20__chr6	0.137228	0.145039	1.05692	0.128243
Wdr20a__chr12	0.113615	0.120077	1.05687	0.10741
Itpr1__chr6	0.135616	0.143326	1.05685	0.126836
Arc__chr15	0.11062	0.116907	1.05684	0.104732
Poglut1__chr16	0.132843	0.140391	1.05682	0.124411
Ccdc66__chr14	0.111595	0.117929	1.05676	0.105605
Kdelc2__chr9	0.134642	0.142279	1.05672	0.125985
Wt1__chr2	0.122994	0.129967	1.0567	0.115743
Trim56__chr5	0.116526	0.123121	1.0566	0.110005
Snx19__chr9	0.127666	0.134885	1.05655	0.119866
Abra__chr15	0.11459	0.12106	1.05645	0.10828
Nos2__chr11	0.123358	0.130298	1.05626	0.116065
Tpm1__chr9	2.89699	3.05989	1.05623	0.329756
Akap5__chr12	0.115402	0.121882	1.05615	0.109004
Ppp6r2__chr15	0.110356	0.116547	1.05611	0.104496
Asb11__chrX	0.141302	0.149228	1.0561	0.131787
Hadh__chr3	0.267982	0.283	1.05604	0.235107
Rapgef4__chr2	0.128264	0.135439	1.05595	0.120392
Ciz1__chr2	0.134693	0.142216	1.05585	0.12603
Dynap__chr18	0.106974	0.112948	1.05585	0.101462
Mtr__chr13	0.123104	0.129975	1.05581	0.115841
Gtdc1__chr2	0.111488	0.117703	1.05575	0.105509
Hspa12a__chr19	0.117783	0.124349	1.05575	0.111123
Fam175a__chr5	0.115846	0.122302	1.05573	0.109399
Nrn1__chr13	0.113839	0.120159	1.05552	0.10761
Mrpl55__chr11	0.139272	0.146997	1.05546	0.130023
Slc12a2__chr18	0.137697	0.145313	1.05531	0.128651
Kif16b__chr2	0.121352	0.128061	1.05528	0.11429
Spata5__chr3	0.114439	0.120758	1.05522	0.108145
A530016L24Rik__chr12	0.110462	0.116561	1.05522	0.104591
Tppp__chr13	0.111769	0.117934	1.05515	0.105761
Flnc__chr6	0.153895	0.162378	1.05512	0.142654
Adh1__chr3	0.117872	0.124357	1.05501	0.111203
Glcci1__chr6	0.123305	0.130071	1.05487	0.116019
Pogk__chr1	0.127415	0.134406	1.05487	0.119645
Kctd12b__chrX	0.130953	0.138132	1.05482	0.122754
Dcaf5__chr12	0.130986	0.138145	1.05466	0.122783
Rhd__chr4	0.111863	0.117971	1.05461	0.105844
Synpo2__chr3	0.116864	0.123234	1.05451	0.110306
Fam134b__chr15	0.236968	0.249877	1.05448	0.211008
Yap1__chr9	0.145542	0.153456	1.05437	0.135462
Rarres1__chr3	0.108721	0.11463	1.05435	0.103031
Smurf2__chr11	0.153788	0.162144	1.05433	0.142562
Pdp2__chr8	0.116108	0.122411	1.05429	0.109633
Gucy1a3__chr3	0.120577	0.127117	1.05424	0.113604
Sln__chr9	0.106974	0.112756	1.05405	0.101462
Tmem98__chr11	0.128028	0.134938	1.05398	0.120184
Gpr146__chr5	0.16481	0.173705	1.05397	0.151963
Myo6__chr9	0.139287	0.146796	1.05391	0.130036
Msantd3__chr4	0.121038	0.127553	1.05383	0.114012
Mccc2__chr13	0.116528	0.122799	1.05382	0.110007
Rab3a__chr8	0.123786	0.130409	1.0535	0.116444
Ppargc1b__chr18	0.134223	0.1414	1.05347	0.125619
Ppapdc3__chr2	0.123437	0.130032	1.05342	0.116136
Rnf207__chr4	0.127064	0.133846	1.05337	0.119336
Mrap__chr16	0.115099	0.121237	1.05333	0.108734
Comp__chr8	0.110233	0.116052	1.05279	0.104386
Lrp2bp__chr8	0.107906	0.113591	1.05268	0.102299
Nt5c3b__chr11	0.128038	0.134782	1.05267	0.120194
Rcan2__chr17	0.229379	0.241449	1.05262	0.204997
Trim55__chr3	0.108226	0.113915	1.05257	0.102586
Gpd1l__chr9	0.138824	0.14612	1.05256	0.129633
Pgm2__chr4	0.194939	0.205156	1.05241	0.177136
Fzd8__chr18	0.117428	0.123577	1.05236	0.110808
Piezo2__chr18	0.117614	0.123759	1.05224	0.110973
Zkscan17__chr11	0.120372	0.126649	1.05214	0.113422
Cbfa2t3__chr8	0.166939	0.17563	1.05206	0.153766
Apool__chrX	0.126523	0.133105	1.05202	0.118859
Aspm__chr1	0.122606	0.12898	1.05199	0.1154
Camta1__chr4	0.191182	0.201101	1.05188	0.174038
Ppm1l__chr3	0.11958	0.125784	1.05188	0.112719
Ppfia4__chr1	0.117783	0.123891	1.05186	0.111123
Kcnq1__chr7	0.125909	0.132419	1.0517	0.118318
Snhg12__chr4	0.12463	0.131067	1.05165	0.117189
Ccdc3__chr2	0.112515	0.118319	1.05159	0.106427
Slc25a34__chr4	0.119468	0.125604	1.05136	0.11262
Ate1__chr7	0.138374	0.14547	1.05128	0.129242
Calcrl__chr2	0.146355	0.153851	1.05122	0.136164
Snx13__chr12	0.14286	0.150171	1.05117	0.13314
Wipf3__chr6	0.118301	0.124348	1.05112	0.111583
Got1__chr19	0.420309	0.441728	1.05096	0.343201
Cyp39a1__chr17	0.114228	0.120048	1.05095	0.107957
Fam179b__chr12	0.131569	0.138269	1.05093	0.123295
Tspan3__chr9	0.304195	0.319622	1.05071	0.262315
Zfp946__chr17	0.117198	0.123135	1.05066	0.110603
Tmem186__chr16	0.115482	0.121324	1.05059	0.109075
Zfp536__chr7	0.110042	0.115605	1.05055	0.104215
Sympk__chr7	0.14536	0.152701	1.0505	0.135304
Erbb2__chr11	0.110645	0.116232	1.05049	0.104755
Tmem62__chr2	0.116885	0.122785	1.05048	0.110324
Med1__chr11	0.148083	0.155555	1.05046	0.137656
Plin5__chr17	0.148114	0.155557	1.05025	0.137682
Nepn__chr10	0.111055	0.11662	1.05011	0.105122
Rsf1__chr7	0.13773	0.144628	1.05009	0.12868
Cdk5rap1__chr2	0.110841	0.116383	1.05	0.10493
2210404O09Rik__chr17	0.119339	0.125297	1.04993	0.112505
Rttn__chr18	0.111619	0.117189	1.0499	0.105626
Scaper__chr9	0.126989	0.133281	1.04955	0.119269
Scube2__chr7	0.120613	0.126586	1.04953	0.113635
Zfp219__chr14	0.114705	0.120384	1.04951	0.108383
Tns1__chr1	0.452768	0.475167	1.04947	0.364183
Stap2__chr17	0.119029	0.124913	1.04943	0.11223
Nppb__chr4	0.192591	0.202106	1.04941	0.175201
Trim13__chr14	0.115284	0.120976	1.04938	0.108899
D17H6S53E__chr17	0.119943	0.12586	1.04933	0.113042
Tbce__chr13	0.115126	0.120795	1.04924	0.108758
Adra1b__chr11	0.127475	0.133748	1.04921	0.119698
St5__chr7	0.133531	0.140093	1.04915	0.125013
Spa17__chr9	0.112007	0.117505	1.04908	0.105974
Abcb4__chr5	0.115088	0.12073	1.04902	0.108724
Rdh13__chr7	0.122253	0.128239	1.04896	0.115088
Fam222a__chr5	0.107169	0.112403	1.04883	0.101637
Tecrl__chr5	0.122554	0.128521	1.04869	0.115354
Crybg3__chr16	0.118684	0.12446	1.04867	0.111924
Lrrc2__chr9	0.283279	0.297059	1.04864	0.246721
Pm20d1__chr1	0.108391	0.113663	1.04863	0.102735
Scn1b__chr7	0.123996	0.130014	1.04854	0.116629
Ogfod3__chr11	0.134569	0.141092	1.04847	0.125921
Hif1an__chr19	0.133395	0.13985	1.04839	0.124894
C1qtnf4__chr2	0.108302	0.113537	1.04833	0.102655
Idh3b__chr2	0.475273	0.498237	1.04832	0.378335
Wif1__chr10	0.108751	0.114003	1.04829	0.103057
Pvrl2__chr7	0.134113	0.140588	1.04829	0.125522
Lnx1__chr5	0.113266	0.118735	1.04828	0.107099
Angpt1__chr15	0.120806	0.126638	1.04828	0.113807
Tmem144__chr3	0.108782	0.114033	1.04827	0.103086
Ric3__chr7	0.10864	0.113879	1.04823	0.102957
Snta1__chr2	0.129021	0.135238	1.04819	0.121057
Gcfc2__chr6	0.108309	0.113519	1.04811	0.102661
Vps54__chr11	0.142428	0.149278	1.0481	0.132764
Ranbp6__chr19	0.116431	0.122021	1.04801	0.109921
Zfp426__chr9	0.118698	0.124391	1.04796	0.111936
E330023G01Rik__chr9	0.112997	0.118411	1.04791	0.106858
Prnp__chr2	0.174853	0.183217	1.04784	0.160437
Cenpm__chr15	0.121265	0.127056	1.04775	0.114213
Dand5__chr8	0.113532	0.118949	1.04772	0.107336
Kat6b__chr14	0.128184	0.134295	1.04767	0.120321
Dgcr14__chr16	0.119679	0.125385	1.04767	0.112807
Ivns1abp__chr1	0.320394	0.335655	1.04763	0.274171
Krcc1__chr6	0.177098	0.185533	1.04763	0.162321
Zfp521__chr18	0.114156	0.119584	1.04755	0.107893
Ccnf__chr17	0.117142	0.122701	1.04746	0.110553
Cyfip2__chr11	0.158598	0.166123	1.04745	0.146677
Atp1b2__chr11	0.12702	0.133038	1.04739	0.119297
Luzp1__chr4	0.146416	0.153336	1.04726	0.136217
Ddx31__chr2	0.118777	0.124389	1.04725	0.112006
Taf15__chr11	0.117645	0.123196	1.04718	0.111001
Ercc6l2__chr13	0.119692	0.125328	1.04709	0.112819
Ufl1__chr4	0.13601	0.142401	1.04699	0.12718
Zbed6__chr1	0.117693	0.123222	1.04698	0.111043
Klhl24__chr16	0.160931	0.168471	1.04685	0.148666
Slc12a7__chr13	0.18861	0.197432	1.04677	0.17191
Tmem259__chr10	0.153485	0.160656	1.04672	0.142302
Cir1__chr2	0.149608	0.156581	1.04661	0.13897
Otud3__chr4	0.112929	0.118188	1.04657	0.106797
Ggps1__chr13	0.121004	0.126638	1.04656	0.113982
Cnnm3__chr1	0.122536	0.12824	1.04654	0.115339
Vwa7__chr17	0.115527	0.120903	1.04654	0.109115
4933439C10Rik__chr11	0.110411	0.11554	1.04645	0.104546
Mypn__chr10	0.137552	0.143931	1.04638	0.128525
Fkbp4__chr6	0.336618	0.352205	1.0463	0.285855
Gfra2__chr14	0.109572	0.11464	1.04625	0.103794
Snap47__chr11	0.135305	0.141554	1.04619	0.126565
Btbd11__chr10	0.108292	0.113294	1.04618	0.102646
Lama3__chr18	0.109808	0.114868	1.04608	0.104005
Trim43a__chr9	0.106974	0.111903	1.04608	0.101462
Scnm1__chr3	0.131752	0.137801	1.04591	0.123456
Fbxl7__chr15	0.110132	0.115182	1.04585	0.104296
Klf9__chr19	0.205506	0.214911	1.04576	0.185787
Mfap4__chr11	0.141969	0.148459	1.04572	0.132366
Igsf1__chrX	0.114574	0.119811	1.04571	0.108266
Nudt6__chr3	0.12131	0.126838	1.04557	0.114253
Mrpl51__chr6	0.237584	0.248391	1.04549	0.211494
Meis1__chr11	0.115826	0.121092	1.04546	0.109382
9430020K01Rik__chr18	0.155887	0.162972	1.04545	0.14436
Tmcc2__chr1	0.121516	0.127031	1.04539	0.114436
Dusp9__chrX	0.107854	0.112746	1.04536	0.102252
Ptpn21__chr12	0.123193	0.128779	1.04534	0.115919
Cd151__chr7	0.297127	0.310577	1.04527	0.257082
Rhof__chr5	0.111353	0.116393	1.04526	0.105389
Pnpt1__chr11	0.128607	0.13442	1.04519	0.120694
Frmd5__chr2	0.119373	0.124758	1.04512	0.112535
Catsperb__chr12	0.107286	0.112125	1.04511	0.101742
Extl1__chr4	0.116742	0.122004	1.04508	0.110197
Ppm1k__chr6	0.136353	0.142496	1.04506	0.127479
Fgf16__chrX	0.11412	0.119255	1.045	0.107861
Pdgfc__chr3	0.111312	0.116317	1.04497	0.105352
Cacfd1__chr2	0.139845	0.146131	1.04495	0.130522
Uqcr11__chr10	0.307916	0.321756	1.04495	0.265056
Zfp691__chr4	0.11357	0.118667	1.04488	0.10737
Kdm4c__chr4	0.115874	0.121068	1.04483	0.109424
Ubr5__chr15	0.188573	0.197017	1.04478	0.171879
Ston1__chr17	0.10758	0.11239	1.04471	0.102006
Corin__chr5	0.159313	0.166432	1.04469	0.147287
Tfrc__chr16	0.151878	0.15866	1.04465	0.140923
Tdrkh__chr3	0.107849	0.112663	1.04464	0.102248
Ubr3__chr2	0.20167	0.210646	1.04451	0.182657
Gramd1b__chr9	0.112552	0.117549	1.04439	0.106461
Med9__chr11	0.133682	0.139613	1.04436	0.125146
Slc6a9__chr4	0.110693	0.115599	1.04432	0.104798
Lyst__chr13	0.115415	0.120523	1.04426	0.109015
Ptpla__chr2	0.168718	0.176159	1.0441	0.155271
Idh3a__chr9	0.264841	0.276501	1.04402	0.232701
Tead1__chr7	0.229911	0.240012	1.04394	0.20542
Stra8__chr6	0.109307	0.114107	1.04391	0.103556
Klhl23__chr2	0.111785	0.116692	1.0439	0.105775
Cdh23__chr10	0.11027	0.115108	1.04387	0.104419
Katnal1__chr5	0.129429	0.135103	1.04384	0.121417
Prox1__chr1	0.10851	0.113265	1.04382	0.102841
Zbed3__chr13	0.12376	0.12918	1.04379	0.116421
Harbi1__chr2	0.114072	0.119068	1.04379	0.107818
Gm5113__chr7	0.109408	0.114195	1.04375	0.103647
Yipf6__chrX	0.129181	0.134812	1.04359	0.121199
Herc2__chr7	0.151084	0.157659	1.04352	0.14024
Khdrbs3__chr15	0.131094	0.136772	1.04331	0.122878
Fam101b__chr11	0.220295	0.229826	1.04327	0.197741
Lrif1__chr3	0.125487	0.130906	1.04318	0.117946
Ephb1__chr9	0.112026	0.116857	1.04313	0.10599
Atp6v0a4__chr6	0.107333	0.11195	1.04302	0.101785
Crebrf__chr17	0.152268	0.15881	1.04296	0.141258
Mrpl21__chr19	0.133262	0.138986	1.04295	0.124778
Mylk__chr16	0.146695	0.152982	1.04286	0.136458
Brca2__chr5	0.117486	0.122514	1.0428	0.110859
Slc35e3__chr10	0.123247	0.128514	1.04273	0.115967
Cdk15__chr1	0.1072	0.111779	1.04272	0.101665
Nipal3__chr4	0.124604	0.129921	1.04267	0.117167
Mccc1__chr3	0.129654	0.135174	1.04257	0.121614
Wwtr1__chr3	0.205929	0.214681	1.0425	0.186131
Pex11a__chr7	0.110094	0.114764	1.04242	0.104261
Plekhg1__chr10	0.119495	0.124559	1.04238	0.112644
Impa2__chr18	0.114759	0.119619	1.04235	0.108431
Unc45b__chr11	0.19265	0.200801	1.04231	0.17525
Mb21d2__chr16	0.114815	0.119673	1.04231	0.108481
Nova2__chr7	0.118619	0.123636	1.0423	0.111866
Fxr2__chr11	0.167967	0.175058	1.04222	0.154635
Smim13__chr13	0.151327	0.157707	1.04216	0.140449
Sil1__chr18	0.133119	0.138726	1.04212	0.124652
Gigyf2__chr1	0.144176	0.150238	1.04204	0.134279
Tram2__chr1	0.108254	0.112805	1.04204	0.102611
Lrrc40__chr3	0.122258	0.127395	1.04202	0.115093
Nckap1__chr2	0.115262	0.120103	1.042	0.108879
Osbp2__chr11	0.108663	0.113225	1.04198	0.102979
Gab2__chr7	0.145464	0.151562	1.04192	0.135394
Tmem74b__chr2	0.108262	0.112795	1.04188	0.102618
Sec61a2__chr2	0.127745	0.133092	1.04186	0.119935
Tceanc__chrX	0.109448	0.114024	1.04181	0.103683
Gpr149__chr3	0.107009	0.111481	1.04179	0.101493
Megf10__chr18	0.108491	0.113024	1.04179	0.102824
Olfr1443__chr19	0.110787	0.115408	1.04171	0.104882
Olfr558__chr7	0.110849	0.115466	1.04165	0.104938
Adk__chr14	0.155718	0.162203	1.04164	0.144216
Mepce__chr5	0.125971	0.1312	1.04151	0.118373
Usp34__chr11	0.167833	0.174768	1.04132	0.154522
Sowaha__chr11	0.10765	0.112087	1.04122	0.102069
Lamc2__chr1	0.112709	0.117339	1.04108	0.106601
Zfp30__chr7	0.110192	0.114711	1.041	0.10435
Mmp15__chr8	0.138493	0.144163	1.04094	0.129345
Ptpn23__chr9	0.131278	0.136651	1.04092	0.12304
Ppm1j__chr3	0.114013	0.118667	1.04082	0.107765
A630007B06Rik__chr19	0.113383	0.118008	1.04079	0.107203
Cox15__chr19	0.145735	0.151678	1.04077	0.135629
Mdh1__chr11	0.690816	0.71896	1.04074	0.498904
Tmem53__chr4	0.117912	0.122705	1.04065	0.111238
Crbn__chr6	0.129399	0.134656	1.04063	0.12139
Sult1a1__chr7	0.130006	0.135282	1.04059	0.121923
0610009O20Rik__chr18	0.138371	0.143982	1.04055	0.129239
Ptcd1__chr5	0.114212	0.118839	1.04051	0.107943
Gulp1__chr1	0.113998	0.118615	1.0405	0.107752
Eri3__chr4	0.175402	0.182506	1.0405	0.160899
Rcor1__chr12	0.118873	0.123677	1.04041	0.112092
Hook1__chr4	0.107223	0.111547	1.04033	0.101685
Dpm3__chr3	0.152897	0.15906	1.04031	0.141797
Tnip1__chr11	0.137784	0.143331	1.04026	0.128727
Cdkn1c__chr7	0.16737	0.174101	1.04022	0.154131
Ssx2ip__chr3	0.124662	0.129675	1.04021	0.117218
Sssca1__chr19	0.120519	0.125363	1.04019	0.113552
Gm5779__chr10	0.11244	0.116958	1.04018	0.106361
Cog4__chr8	0.141826	0.147515	1.04012	0.132242
Dolk__chr2	0.131727	0.13701	1.04011	0.123433
Elk4__chr1	0.109996	0.114407	1.0401	0.104174
Mlycd__chr8	0.142562	0.148264	1.04	0.132881
9630033F20Rik__chr6	0.133514	0.138855	1.04	0.124999
Bag2__chr1	0.120932	0.125765	1.03996	0.113918
Pdss2__chr10	0.108679	0.11302	1.03995	0.102992
1700001G11Rik__chr14	0.107218	0.111498	1.03992	0.101681
Ubr1__chr2	0.149268	0.155218	1.03986	0.138677
Plcxd2__chr16	0.112579	0.117064	1.03984	0.106485
Cttn__chr7	0.160197	0.166575	1.03981	0.148041
Mark1__chr1	0.110558	0.114957	1.03979	0.104677
Cds2__chr2	0.194392	0.202116	1.03974	0.176685
Letm2__chr8	0.109615	0.113966	1.03969	0.103832
1700120C14Rik__chr15	0.113321	0.117817	1.03968	0.107148
Trim63__chr4	0.174375	0.181291	1.03967	0.160036
Crim1__chr17	0.151719	0.157736	1.03966	0.140786
Nxpe2__chr9	0.111245	0.11565	1.0396	0.105292
Gpr39__chr1	0.11476	0.119303	1.03959	0.108432
Tnik__chr3	0.11422	0.118729	1.03948	0.10795
Slc22a23__chr13	0.108856	0.113152	1.03947	0.103151
Col6a5__chr9	0.107255	0.111483	1.03942	0.101714
Pole__chr5	0.118148	0.122798	1.03936	0.111448
9430018G01Rik__chr6	0.108469	0.112732	1.0393	0.102805
Spata7__chr12	0.109202	0.113487	1.03923	0.103462
Gja1__chr10	0.283858	0.29496	1.03911	0.247157
Erg__chr16	0.109031	0.113295	1.03911	0.103308
Lix1__chr17	0.109948	0.114246	1.03909	0.10413
Glmn__chr5	0.111381	0.115735	1.03909	0.105413
Tspan11__chr6	0.107749	0.111957	1.03905	0.102158
Gtdc2__chr9	0.114547	0.119018	1.03903	0.108242
Klhl41__chr2	0.117924	0.122523	1.039	0.111249
Plekhg5__chr4	0.128998	0.134022	1.03894	0.121038
Usp53__chr3	0.109156	0.1134	1.03888	0.10342
P2ry1__chr3	0.120969	0.125665	1.03882	0.113951
Srpk3__chrX	0.121111	0.125812	1.03882	0.114077
Nomo1__chr7	0.229251	0.238147	1.0388	0.204896
Gm5617__chr9	0.117498	0.12205	1.03874	0.11087
1110059E24Rik__chr19	0.136836	0.142133	1.03871	0.127901
2210416O15Rik__chr11	0.107101	0.111229	1.03854	0.101576
Ppp1r1a__chr15	0.108023	0.112181	1.03849	0.102404
Krba1__chr6	0.112091	0.116405	1.03849	0.106049
Il17rd__chr14	0.110893	0.115159	1.03847	0.104976
Sncg__chr14	0.117319	0.121823	1.03839	0.110711
Aph1b__chr9	0.110018	0.11424	1.03838	0.104193
Alg1__chr16	0.107806	0.11194	1.03835	0.102209
Myom2__chr8	0.301727	0.313246	1.03818	0.260492
Wbscr17__chr5	0.108759	0.11291	1.03817	0.103065
Cdca4__chr12	0.155103	0.161021	1.03815	0.143689
Prdm16__chr4	0.119388	0.123942	1.03814	0.112549
Coq7__chr7	0.168118	0.174528	1.03813	0.154764
Nme7__chr1	0.111827	0.116091	1.03813	0.105813
Fzd4__chr7	0.114638	0.11899	1.03796	0.108323
Ppp1r9a__chr6	0.11897	0.123486	1.03795	0.112178
Nat10__chr2	0.119578	0.124114	1.03793	0.112718
0610011F06Rik__chr17	0.114868	0.119217	1.03786	0.108528
Sh3bp5__chr14	0.154275	0.160102	1.03777	0.14298
Slc25a38__chr9	0.121495	0.126076	1.0377	0.114417
Esco1__chr18	0.131034	0.135973	1.03769	0.122826
Agtr1a__chr13	0.117541	0.121968	1.03767	0.110908
Oxld1__chr11	0.11806	0.122501	1.03762	0.111369
Gfod1__chr13	0.117078	0.121472	1.03753	0.110496
Kazald1__chr19	0.110598	0.114743	1.03748	0.104713
Usp27x__chrX	0.109441	0.11354	1.03745	0.103676
Ano1__chr7	0.10978	0.113888	1.03742	0.10398
Cntnap3__chr13	0.107148	0.111155	1.0374	0.101618
Zfp667__chr7	0.110007	0.11412	1.03739	0.104183
Arhgap10__chr8	0.13933	0.144527	1.0373	0.130074
Tbc1d10c__chr19	0.110717	0.114832	1.03716	0.10482
Lancl1__chr1	0.12405	0.12866	1.03716	0.116677
Nbea__chr3	0.127727	0.13247	1.03713	0.11992
Txnrd2__chr16	0.116849	0.121184	1.0371	0.110292
Sugp2__chr8	0.119883	0.12433	1.03709	0.112988
Aifm1__chrX	0.135483	0.140503	1.03705	0.12672
Klk14__chr7	0.107992	0.111989	1.03702	0.102376
Tk1__chr11	0.148742	0.154233	1.03692	0.138224
Tmem79__chr3	0.107258	0.111217	1.03691	0.101717
Gjb3__chr4	0.116382	0.120661	1.03676	0.109877
Arsb__chr13	0.119933	0.12434	1.03674	0.113032
Hsdl2__chr4	0.152197	0.157784	1.03671	0.141197
Aven__chr2	0.121556	0.12601	1.03664	0.114471
Gpc4__chrX	0.118324	0.122659	1.03664	0.111604
Mlkl__chr8	0.119915	0.124306	1.03662	0.113016
Zfp935__chr13	0.11856	0.122896	1.03657	0.111814
Cspp1__chr1	0.117087	0.121362	1.03651	0.110504
Psd3__chr8	0.136697	0.141669	1.03638	0.127779
Fam210a__chr18	0.1618	0.167676	1.03632	0.149405
Cox8b__chr7	0.248497	0.257504	1.03624	0.220054
Gm12295__chr11	0.108244	0.112167	1.03623	0.102603
D630010B17Rik__chr15	0.10975	0.113708	1.03606	0.103953
BB283400__chr6	0.110216	0.114184	1.036	0.104371
Echdc3__chr2	0.113107	0.117179	1.036	0.106956
Bnc1__chr7	0.107847	0.111729	1.03599	0.102246
Ptges2__chr2	0.128254	0.132868	1.03598	0.120383
Ndufb6__chr4	0.309412	0.320539	1.03596	0.266155
Ppp1r3a__chr6	0.13005	0.134725	1.03595	0.121962
Irs1__chr1	0.127614	0.1322	1.03594	0.11982
Arhgap20__chr9	0.114264	0.118367	1.0359	0.10799
5430440P10Rik__chr14	0.114977	0.119094	1.03581	0.108625
Arhgef28__chr13	0.11601	0.120153	1.03572	0.109545
Zfp507__chr7	0.111537	0.11552	1.03571	0.105553
Me1__chr9	0.154872	0.160399	1.03569	0.143491
Zfp428__chr7	0.117253	0.121436	1.03567	0.110652
Clasp2__chr9	0.136418	0.141283	1.03566	0.127536
Tmem70__chr1	0.164258	0.170115	1.03566	0.151494
Hs3st5__chr10	0.107194	0.111012	1.03562	0.101659
Trib2__chr12	0.13037	0.135008	1.03558	0.122243
Tmem5__chr10	0.124396	0.128821	1.03558	0.116983
Rom1__chr19	0.116963	0.121122	1.03556	0.110394
Efcab7__chr4	0.108927	0.112796	1.03552	0.103215
Abcb11__chr2	0.10735	0.111161	1.0355	0.1018
Rpa3__chr6	0.117684	0.121846	1.03537	0.111035
Camsap2__chr1	0.140063	0.14501	1.03531	0.130711
Fahd2a__chr2	0.113926	0.117944	1.03527	0.107688
Mrpl45__chr11	0.168975	0.174927	1.03522	0.155488
Hey1__chr3	0.12466	0.129042	1.03515	0.117216
Fxr1__chr3	0.150875	0.156168	1.03508	0.140061
Arl4d__chr11	0.114635	0.118651	1.03503	0.10832
Rps6ka6__chrX	0.107067	0.110809	1.03495	0.101546
Slc6a2__chr8	0.110411	0.114268	1.03493	0.104545
Eln__chr5	0.177571	0.183771	1.03492	0.162717
Rdh5__chr10	0.111251	0.115131	1.03488	0.105297
Ube2ql1__chr13	0.110168	0.114002	1.0348	0.104328
Hspb3__chr13	0.110598	0.114446	1.03479	0.104713
Tbx3__chr5	0.115699	0.119718	1.03474	0.109268
Lgi1__chr19	0.110159	0.113984	1.03473	0.104319
Kank2__chr9	0.160667	0.16624	1.03469	0.148441
Mkln1__chr6	0.13854	0.143343	1.03467	0.129386
Gm4841__chr18	0.112514	0.116412	1.03464	0.106427
Eci2__chr13	0.182516	0.188834	1.03462	0.166848
Rapgefl1__chr11	0.107562	0.111284	1.03461	0.10199
C1qtnf1__chr11	0.123414	0.127679	1.03456	0.116115
Sfi1__chr11	0.122507	0.126737	1.03453	0.115313
Lcor__chr19	0.10829	0.112027	1.03451	0.102644
Kcnb1__chr2	0.140678	0.145529	1.03448	0.131246
Fert2__chr17	0.122243	0.126457	1.03447	0.11508
Podxl2__chr6	0.111944	0.115803	1.03447	0.105918
C030016D13Rik__chr19	0.106974	0.110658	1.03443	0.101462
Arhgap44__chr11	0.111119	0.11493	1.0343	0.105179
Slc7a6os__chr8	0.125103	0.12939	1.03427	0.117606
Kbtbd13__chr9	0.107487	0.111166	1.03422	0.101923
Gna14__chr19	0.106993	0.110643	1.03412	0.101479
Dpy19l4__chr4	0.112033	0.115855	1.03412	0.105997
Nit1__chr1	0.118084	0.122112	1.03411	0.11139
AI414108__chr9	0.110532	0.114299	1.03407	0.104654
Mprip__chr11	0.238567	0.246689	1.03404	0.212269
Usp49__chr17	0.109963	0.113699	1.03398	0.104144
0610040F04Rik__chr6	0.108168	0.111843	1.03397	0.102535
Slc46a3__chr5	0.111684	0.115476	1.03396	0.105685
Tmem126b__chr7	0.114152	0.118021	1.0339	0.107889
Pabpc4__chr4	0.132088	0.136563	1.03388	0.12375
Fam13c__chr10	0.10817	0.111832	1.03386	0.102536
Tmem68__chr4	0.12193	0.126053	1.03381	0.114802
Celsr2__chr3	0.11055	0.114286	1.03379	0.10467
Tnks__chr8	0.117493	0.12146	1.03377	0.110865
Nrip2__chr6	0.107707	0.111342	1.03375	0.10212
Megf11__chr9	0.107421	0.111037	1.03365	0.101864
Uchl1__chr5	0.13377	0.138267	1.03361	0.125223
Fam160a1__chr3	0.110975	0.114705	1.03361	0.105051
Ogdhl__chr14	0.107046	0.11064	1.03358	0.101526
Unc13c__chr9	0.107787	0.111405	1.03357	0.102192
Mtus2__chr5	0.162258	0.167704	1.03357	0.149795
Gm1968__chr16	0.107406	0.111001	1.03347	0.10185
Enam__chr5	0.108074	0.11168	1.03337	0.10245
Trit1__chr4	0.115106	0.118944	1.03334	0.10874
Klhl34__chrX	0.107522	0.111105	1.03332	0.101954
Fuk__chr8	0.114021	0.11781	1.03324	0.107772
Inhbb__chr1	0.132579	0.136982	1.03321	0.12418
AI462493__chr19	0.14173	0.14643	1.03316	0.132159
2900056M20Rik__chrX	0.116951	0.120827	1.03314	0.110383
Ppip5k2__chr1	0.142842	0.147575	1.03313	0.133124
Hist1h1e__chr13	0.108647	0.112238	1.03305	0.102964
Pcf11__chr7	0.146398	0.151235	1.03304	0.136201
Nuak1__chr10	0.120238	0.124207	1.03301	0.113303
Vangl1__chr3	0.121198	0.125197	1.033	0.114154
Nedd1__chr10	0.121997	0.126021	1.03299	0.114861
Pus7l__chr15	0.113131	0.116862	1.03299	0.106978
Itga8__chr2	0.108777	0.112364	1.03297	0.103081
Pdzd2__chr15	0.133744	0.138154	1.03297	0.1252
Pcdh12__chr18	0.132283	0.136642	1.03295	0.123921
Mtfp1__chr11	0.164947	0.170374	1.0329	0.152079
Fra10ac1__chr19	0.12319	0.127241	1.03288	0.115917
Osr1__chr12	0.11713	0.120979	1.03286	0.110542
Prkab2__chr3	0.1283	0.132512	1.03283	0.120423
Scarna17__chr18	0.10723	0.110748	1.03281	0.101692
Supt20__chr3	0.109769	0.113369	1.0328	0.10397
Acot13__chr13	0.236017	0.243752	1.03277	0.210258
Sgcd__chr11	0.110771	0.114393	1.0327	0.104868
Tctn2__chr5	0.109748	0.113333	1.03267	0.103951
Pfn2__chr3	0.136655	0.141116	1.03264	0.127743
Ankrd26__chr6	0.116469	0.120268	1.03262	0.109954
Ddx55__chr5	0.123325	0.127346	1.0326	0.116037
Lrrc4b__chr7	0.115333	0.119092	1.03259	0.108943
Serpini1__chr3	0.111005	0.114621	1.03258	0.105077
Zfp689__chr7	0.111225	0.114842	1.03253	0.105274
H2-T24__chr17	0.11355	0.117223	1.03235	0.107352
Usp45__chr4	0.12957	0.133756	1.03231	0.12154
Slc25a36__chr9	0.114244	0.117933	1.03229	0.107971
Rnmtl1__chr11	0.118202	0.122018	1.03228	0.111496
Acadm__chr3	0.344299	0.355407	1.03226	0.29132
2310039H08Rik__chr17	0.124268	0.128269	1.03219	0.11687
2610528A11Rik__chr14	0.107254	0.110697	1.0321	0.101714
Dhrs7__chr12	0.156749	0.16178	1.0321	0.145097
Upf2__chr2	0.155213	0.160193	1.03209	0.143783
Abcc10__chr17	0.110081	0.113606	1.03202	0.10425
Inpp4b__chr8	0.109924	0.113437	1.03196	0.104109
Golgb1__chr16	0.184876	0.190782	1.03195	0.168812
Slc11a2__chr15	0.137893	0.142285	1.03185	0.128822
Scn3a__chr2	0.112162	0.115733	1.03184	0.106112
Tle1__chr4	0.115397	0.119069	1.03182	0.108999
Arl3__chr19	0.143868	0.148444	1.03181	0.134013
Sh3bgr__chr16	0.158875	0.163926	1.0318	0.146913
Nudt7__chr8	0.129429	0.133538	1.03175	0.121416
Vmn2r25__chr6	0.106974	0.110368	1.03172	0.101462
Podxl__chr6	0.234429	0.24186	1.0317	0.209002
Deaf1__chr7	0.126663	0.130677	1.03169	0.118982
Plscr2__chr9	0.119099	0.122871	1.03167	0.112292
0610009L18Rik__chr11	0.109266	0.112722	1.03163	0.103519
Polr2j__chr5	0.14347	0.148007	1.03162	0.133668
Ppip5k1__chr2	0.11273	0.11629	1.03158	0.10662
Rrp36__chr17	0.127279	0.131288	1.0315	0.119525
AF529169__chr9	0.107003	0.110371	1.03148	0.101488
Acsm4__chr7	0.106974	0.110337	1.03144	0.101462
Hddc3__chr7	0.110346	0.113815	1.03144	0.104487
Lgals4__chr7	0.11526	0.118879	1.0314	0.108877
Wisp2__chr2	0.146451	0.151041	1.03134	0.136247
Slc7a4__chr16	0.10753	0.110897	1.03132	0.101961
Fabp2__chr3	0.107017	0.110368	1.03131	0.1015
Mapk1ip1__chr7	0.120966	0.12475	1.03128	0.113948
Pdha1__chrX	0.400679	0.413212	1.03128	0.330178
Zfp786__chr6	0.107138	0.11049	1.03128	0.10161
Ascc3__chr10	0.132478	0.136601	1.03113	0.124091
Igfbp2__chr1	0.107068	0.1104	1.03111	0.101547
Sept6__chrX	0.123667	0.127511	1.03108	0.116339
Clca5__chr3	0.108038	0.111387	1.03099	0.102418
Map7__chr10	0.111353	0.114802	1.03097	0.105388
Dars2__chr1	0.116166	0.119762	1.03095	0.109685
Dnajb14__chr3	0.121946	0.125717	1.03093	0.114816
Sox13__chr1	0.126216	0.130108	1.03083	0.118588
Mrpl39__chr16	0.146225	0.150715	1.03071	0.136051
Upf3b__chrX	0.138916	0.143175	1.03066	0.129713
Zbtb3__chr19	0.108097	0.111411	1.03066	0.102471
Zfp651__chr9	0.150404	0.155015	1.03066	0.139655
Abhd17c__chr7	0.131463	0.135493	1.03066	0.123202
Slc29a2__chr19	0.112546	0.115993	1.03063	0.106455
D830046C22Rik__chr5	0.108986	0.112317	1.03056	0.103269
Clcn4-2__chr7	0.252686	0.260403	1.03054	0.223315
Ascl4__chr10	0.107042	0.110311	1.03054	0.101523
Pld1__chr3	0.117399	0.12098	1.0305	0.110782
Fyttd1__chr16	0.149637	0.154195	1.03046	0.138995
Atxn2__chr5	0.166934	0.172016	1.03044	0.153762
Lrsam1__chr2	0.114616	0.118094	1.03035	0.108303
Zfp882__chr8	0.110416	0.113766	1.03034	0.10455
Mcf2l__chr8	0.162914	0.167855	1.03033	0.150353
Gm6525__chr3	0.112888	0.116311	1.03032	0.106761
Rps15a__chr7	0.115582	0.119069	1.03017	0.109164
Olfr805__chr10	0.106974	0.110199	1.03015	0.101462
4732471J01Rik__chr7	0.107921	0.111172	1.03013	0.102312
Homer2__chr7	0.155402	0.160069	1.03003	0.143945
Polr3c__chr3	0.112441	0.115815	1.03001	0.106361
4933408N05Rik__chr8	0.114794	0.118238	1.03	0.108462
Arhgap18__chr10	0.146839	0.151232	1.02992	0.136582
Gm20324__chr15	0.107959	0.111185	1.02988	0.102347
Unk__chr11	0.119318	0.122879	1.02985	0.112487
Syt9__chr7	0.107173	0.110371	1.02984	0.101641
AW112010__chr19	0.125789	0.12954	1.02982	0.118212
Klhl40__chr9	0.113191	0.116564	1.0298	0.107031
Zfyve16__chr13	0.116964	0.120444	1.02975	0.110395
Acadsb__chr7	0.158428	0.163137	1.02972	0.146532
Cenpe__chr3	0.139988	0.144149	1.02972	0.130646
Map3k4__chr17	0.121964	0.125577	1.02963	0.114832
Opn1sw__chr6	0.109972	0.113226	1.02959	0.104152
Esm1__chr13	0.114003	0.117374	1.02957	0.107756
Clps__chr17	0.108372	0.111573	1.02953	0.102717
Piezo1__chr8	0.109013	0.112233	1.02953	0.103292
Rbp7__chr4	0.126624	0.130363	1.02953	0.118948
Tmem81__chr1	0.110017	0.113262	1.0295	0.104192
Mmab__chr5	0.125998	0.129714	1.0295	0.118396
Chrdl2__chr7	0.107207	0.110368	1.02949	0.101671
Rbbp9__chr2	0.124248	0.127903	1.02942	0.116852
Sipa1l2__chr8	0.142251	0.146436	1.02942	0.132611
Rtn4ip1__chr10	0.130609	0.134437	1.02931	0.122453
Tnfsf10__chr3	0.118779	0.122258	1.02929	0.112008
Skiv2l2__chr13	0.141555	0.145695	1.02925	0.132007
Thsd1__chr8	0.116462	0.11986	1.02917	0.109948
Tapt1__chr5	0.129469	0.133246	1.02917	0.121452
Cma1__chr14	0.106974	0.110086	1.02909	0.101462
Msi2__chr11	0.183907	0.189244	1.02902	0.168006
Slc25a31__chr3	0.107398	0.110513	1.029	0.101843
Homer1__chr13	0.135971	0.139905	1.02893	0.127146
Abcb1a__chr5	0.130883	0.134664	1.02889	0.122693
Vsig1__chrX	0.106974	0.110064	1.02888	0.101462
As3mt__chr19	0.129951	0.133703	1.02887	0.121875
Ppil1__chr17	0.12807	0.131758	1.0288	0.120221
Shcbp1__chr8	0.117658	0.121045	1.02879	0.111012
Afap1__chr5	0.134874	0.138756	1.02879	0.126188
Fras1__chr5	0.107917	0.111017	1.02872	0.102309
Ckap5__chr2	0.138741	0.142725	1.02871	0.129561
Xcr1__chr9	0.116233	0.119565	1.02867	0.109744
Clpp__chr17	0.148689	0.15295	1.02866	0.138178
Afap1l2__chr19	0.109266	0.112396	1.02865	0.103519
Amy1__chr3	0.110862	0.114037	1.02864	0.104949
8030462N17Rik__chr18	0.108587	0.11169	1.02857	0.102911
3110007F17Rik__chrX	0.108405	0.111501	1.02856	0.102747
Atrnl1__chr19	0.12784	0.131489	1.02854	0.120019
Grid1__chr14	0.107008	0.110055	1.02847	0.101493
Cetn2__chrX	0.134609	0.138437	1.02843	0.125956
Hcn2__chr10	0.110272	0.113395	1.02831	0.104421
Tcf12__chr9	0.160133	0.164665	1.0283	0.147986
Prr12__chr7	0.143489	0.14755	1.0283	0.133684
Rpp38__chr2	0.11658	0.119867	1.0282	0.110053
Plekha6__chr1	0.137557	0.141434	1.02818	0.12853
Rabl6__chr2	0.156125	0.160518	1.02813	0.144564
Papolg__chr11	0.113521	0.116713	1.02812	0.107326
Asb12__chrX	0.108154	0.111195	1.02812	0.102522
Brpf3__chr17	0.120501	0.123879	1.02803	0.113537
Angpt2__chr8	0.121819	0.125233	1.02802	0.114704
Ttc30b__chr2	0.117755	0.121054	1.02802	0.111098
Nanos2__chr7	0.107046	0.110045	1.02801	0.101527
Cdca2__chr14	0.120528	0.123903	1.028	0.11356
Tusc5__chr11	0.108086	0.111107	1.02795	0.102461
Med23__chr10	0.122426	0.125843	1.02792	0.115241
G2e3__chr12	0.122964	0.126389	1.02785	0.115717
Strn__chr17	0.11	0.113058	1.0278	0.104177
Mef2d__chr3	0.115421	0.118629	1.02779	0.109021
Syt3__chr7	0.107977	0.110976	1.02777	0.102362
Lrrc47__chr4	0.108408	0.111416	1.02774	0.10275
AW554918__chr18	0.11079	0.113861	1.02772	0.104884
Klhl4__chrX	0.114944	0.11813	1.02771	0.108596
Pik3c3__chr18	0.121789	0.125164	1.02771	0.114678
Zfp663__chr2	0.107165	0.110132	1.02769	0.101633
Galnt5__chr2	0.107145	0.11011	1.02767	0.101616
Zkscan14__chr5	0.111204	0.114278	1.02765	0.105255
Lmnb2__chr10	0.122047	0.12542	1.02764	0.114906
Reep5__chr18	0.458246	0.470889	1.02759	0.367657
Pdk3__chrX	0.121468	0.124812	1.02753	0.114393
Col11a1__chr3	0.113883	0.117017	1.02752	0.107649
Ect2__chr3	0.11776	0.120999	1.02751	0.111102
Vwf__chr6	0.153077	0.157287	1.0275	0.141952
Zfp936__chr7	0.107155	0.110102	1.0275	0.101624
Fam169a__chr13	0.107452	0.110406	1.0275	0.101891
Cyb5d2__chr11	0.121065	0.124392	1.02748	0.114036
Slc1a3__chr15	0.114628	0.117776	1.02747	0.108314
2700050L05Rik__chr7	0.120901	0.124215	1.02741	0.113891
Akap1__chr11	0.141298	0.145169	1.0274	0.131784
Iffo1__chr6	0.119653	0.122917	1.02728	0.112784
Mustn1__chr14	0.12488	0.128285	1.02726	0.11741
Dus3l__chr17	0.121214	0.124518	1.02726	0.114168
Cts6__chr13	0.107276	0.110199	1.02725	0.101733
S100pbp__chr4	0.107825	0.110761	1.02723	0.102226
Rgs6__chr12	0.111016	0.114038	1.02722	0.105087
Tnnt1__chr7	0.113499	0.116588	1.02721	0.107306
Rhod__chr19	0.11246	0.11552	1.02721	0.106378
Dmpk__chr7	0.296119	0.304176	1.02721	0.256333
Eif2d__chr1	0.121951	0.125266	1.02719	0.114821
Lrch1__chr14	0.129467	0.132984	1.02717	0.12145
Agtpbp1__chr13	0.171107	0.175753	1.02716	0.157286
Dmap1__chr4	0.116296	0.119453	1.02715	0.1098
BC018507__chr13	0.134936	0.138598	1.02714	0.126242
Trmu__chr15	0.114661	0.117766	1.02708	0.108343
Gpt__chr15	0.117572	0.120752	1.02705	0.110936
Ebpl__chr14	0.117559	0.120739	1.02704	0.110924
Sept10__chr10	0.116459	0.119605	1.02702	0.109945
Garem__chr18	0.113383	0.116445	1.02701	0.107203
Izumo4__chr10	0.108581	0.11151	1.02698	0.102904
Mtif2__chr11	0.138285	0.142013	1.02696	0.129164
Btnl9__chr11	0.118539	0.121735	1.02696	0.111795
Cdkal1__chr13	0.126146	0.129545	1.02695	0.118526
3110062M04Rik__chr6	0.114118	0.117191	1.02693	0.107859
BC030476__chr15	0.1099	0.112856	1.0269	0.104087
Tmem158__chr9	0.115894	0.119009	1.02688	0.109442
Trappc2__chrX	0.107992	0.110893	1.02687	0.102376
Tnfrsf23__chr7	0.153661	0.157767	1.02672	0.142454
Hdgfl1__chr13	0.107186	0.110048	1.0267	0.101652
Pdhb__chr14	0.279616	0.287077	1.02668	0.243956
Satb2__chr1	0.107735	0.110609	1.02668	0.102145
Itgb1bp2__chrX	0.166204	0.17063	1.02663	0.153143
Crabp2__chr3	0.111966	0.114947	1.02663	0.105937
Alkbh8__chr9	0.109655	0.112575	1.02662	0.103868
Ppp1r12b__chr1	0.124308	0.127609	1.02656	0.116905
Mrvi1__chr7	0.111451	0.11441	1.02655	0.105477
Ubb__chr11	0.110063	0.112977	1.02648	0.104233
Ocm__chr5	0.107112	0.109947	1.02647	0.101586
Rab3b__chr4	0.107843	0.110686	1.02637	0.102242
4930413G21Rik__chr7	0.107125	0.109947	1.02634	0.101598
Chrna7__chr7	0.106994	0.109805	1.02627	0.10148
Ntsr2__chr12	0.109192	0.112056	1.02623	0.103453
Ap5m1__chr14	0.111828	0.114755	1.02618	0.105813
Heg1__chr16	0.117795	0.120877	1.02617	0.111134
Trim7__chr11	0.107009	0.109808	1.02616	0.101493
Boc__chr16	0.11164	0.114559	1.02615	0.105645
Clcc1__chr3	0.120203	0.123345	1.02614	0.113272
Depdc5__chr5	0.114369	0.117358	1.02614	0.108083
Ppp2r5d__chr17	0.125832	0.129115	1.0261	0.11825
Cox10__chr11	0.160207	0.164376	1.02602	0.148049
Tapbpl__chr6	0.119834	0.12295	1.026	0.112944
Rnu11__chr4	0.10775	0.110544	1.02592	0.102159
Ccdc104__chr11	0.125542	0.128791	1.02588	0.117994
Apol10b__chr15	0.109443	0.112275	1.02587	0.103678
Elp6__chr9	0.112584	0.115484	1.02576	0.106489
BC030307__chr10	0.10879	0.111592	1.02576	0.103093
Ptprm__chr17	0.148539	0.152361	1.02573	0.138049
Pde12__chr14	0.123665	0.126847	1.02573	0.116337
Vezt__chr10	0.125387	0.128607	1.02568	0.117857
Mal__chr2	0.114848	0.11779	1.02561	0.10851
Spsb4__chr9	0.121069	0.124167	1.02558	0.11404
Taf5__chr19	0.112872	0.115755	1.02554	0.106747
Ckap2l__chr2	0.133911	0.137331	1.02553	0.125346
Shank3__chr15	0.164049	0.168237	1.02553	0.151317
2610019E17Rik__chr17	0.113747	0.11665	1.02552	0.107528
Mrpl47__chr3	0.132034	0.135402	1.0255	0.123703
Hey2__chr10	0.108244	0.111003	1.02549	0.102603
Gna12__chr5	0.108574	0.111342	1.02549	0.102899
Amotl1__chr9	0.212687	0.218097	1.02544	0.191614
Tmem178__chr17	0.107633	0.110368	1.02541	0.102054
Apopt1__chr12	0.155213	0.159152	1.02538	0.143783
Mrpl44__chr1	0.127519	0.130753	1.02536	0.119737
Xrcc4__chr13	0.111344	0.114167	1.02535	0.10538
Exog__chr9	0.112094	0.114935	1.02535	0.106051
Pfkfb1__chrX	0.10856	0.111311	1.02535	0.102886
Fbxl21__chr13	0.107395	0.110117	1.02535	0.10184
Pik3r3__chr4	0.115304	0.118226	1.02534	0.108917
Ccpg1__chr9	0.149475	0.15326	1.02532	0.138856
Cep57l1__chr10	0.112927	0.115783	1.02529	0.106796
Stbd1__chr5	0.117238	0.120198	1.02525	0.110639
Pdgfa__chr5	0.166695	0.170902	1.02524	0.15356
Mad2l2__chr4	0.123976	0.127099	1.02519	0.116612
Zfp821__chr8	0.117092	0.120041	1.02518	0.110509
E130309D02Rik__chr5	0.119384	0.122389	1.02517	0.112545
Gm9899__chr5	0.111233	0.114031	1.02515	0.105281
Zfyve9__chr4	0.107644	0.110349	1.02512	0.102064
A530050N04Rik__chr18	0.110278	0.113048	1.02511	0.104426
Sox17__chr1	0.125808	0.128963	1.02508	0.118229
Emc10__chr7	0.219833	0.225346	1.02507	0.197371
Steap1__chr5	0.124385	0.127503	1.02507	0.116973
Dstyk__chr1	0.129898	0.133147	1.02501	0.121828
Urb2__chr8	0.11506	0.117934	1.02498	0.108699
Lmbrd2__chr15	0.10859	0.111302	1.02498	0.102913
E2f7__chr10	0.113367	0.116196	1.02495	0.107189
Dgke__chr11	0.118136	0.121083	1.02494	0.111437
Ahsa2__chr11	0.112081	0.11487	1.02489	0.106039
Cacna1s__chr1	0.108715	0.111419	1.02488	0.103025
Asap2__chr12	0.115954	0.118839	1.02488	0.109496
Rbm15__chr3	0.119625	0.1226	1.02487	0.112759
Adat2__chr10	0.109257	0.11197	1.02483	0.103511
Kpna2__chr11	0.182071	0.186589	1.02482	0.166477
Rgl3__chr9	0.112481	0.115271	1.02481	0.106397
Rbak__chr5	0.110594	0.113338	1.02481	0.10471
Gfra4__chr2	0.111978	0.114756	1.02481	0.105948
Fam213a__chr14	0.119636	0.122604	1.02481	0.112769
Rorc__chr3	0.12019	0.123167	1.02477	0.11326
Timd2__chr11	0.108722	0.111414	1.02477	0.103031
Nr1d1__chr11	0.160053	0.164016	1.02476	0.147918
Tmod1__chr4	0.11172	0.114479	1.0247	0.105717
Six5__chr7	0.113692	0.1165	1.02469	0.107479
Cluap1__chr16	0.114346	0.117169	1.02469	0.108062
Zmat1__chrX	0.115812	0.118671	1.02469	0.109369
Mapkapk3__chr9	0.13179	0.135044	1.02469	0.123489
Gm44__chrX	0.106974	0.109614	1.02468	0.101462
6330408A02Rik__chr7	0.108843	0.111526	1.02465	0.10314
Efnb2__chr8	0.147992	0.151636	1.02463	0.137577
Ucp3__chr7	0.122247	0.125253	1.02459	0.115083
Shank2__chr7	0.107016	0.109647	1.02459	0.1015
Mospd2__chrX	0.111314	0.11405	1.02458	0.105353
Arhgef17__chr7	0.130052	0.133236	1.02448	0.121963
Mrpl4__chr9	0.159912	0.163824	1.02446	0.147798
Pitpnm3__chr11	0.107783	0.110417	1.02443	0.102189
Cd2ap__chr17	0.173508	0.177746	1.02442	0.159308
Slco3a1__chr7	0.181315	0.185741	1.02441	0.165846
Becn1__chr11	0.11339	0.116157	1.0244	0.107209
Id3__chr4	0.315822	0.323517	1.02436	0.270845
Aass__chr6	0.107714	0.110337	1.02436	0.102126
Cyp7b1__chr3	0.113254	0.116011	1.02435	0.107087
Mcpt9__chr14	0.107371	0.109982	1.02431	0.101819
Spc25__chr2	0.123632	0.126638	1.02431	0.116308
Mapre2__chr18	0.209659	0.214749	1.02428	0.189161
Slco5a1__chr1	0.118364	0.121233	1.02424	0.11164
BC051142__chr17	0.107061	0.109653	1.02421	0.10154
Cdkn3__chr14	0.11418	0.116942	1.02419	0.107915
Mesdc2__chr7	0.180837	0.185205	1.02416	0.165447
Plcb1__chr2	0.125564	0.128597	1.02416	0.118013
Oprd1__chr4	0.108038	0.110647	1.02415	0.102418
Gal__chr19	0.107346	0.109936	1.02413	0.101796
Sdsl__chr5	0.110026	0.11268	1.02412	0.1042
Gnb5__chr9	0.11791	0.120755	1.02412	0.111236
Alpk1__chr3	0.11207	0.114768	1.02407	0.10603
Hecw2__chr1	0.114569	0.117325	1.02406	0.108261
Zbtb26__chr2	0.1106	0.113259	1.02404	0.104715
Zfp799__chr17	0.111211	0.113884	1.02404	0.105261
Mitf__chr6	0.137493	0.140796	1.02402	0.128474
Atp2c1__chr9	0.154529	0.158236	1.02399	0.143197
Itga10__chr3	0.107804	0.110389	1.02397	0.102208
Crat__chr2	0.232751	0.238329	1.02396	0.207674
Ddx10__chr9	0.130085	0.133201	1.02395	0.121993
Ppp2r2d__chr7	0.169159	0.17321	1.02394	0.155643
Sema5b__chr16	0.108048	0.110634	1.02394	0.102426
Capn6__chrX	0.116282	0.119064	1.02392	0.109787
Tmem136__chr9	0.113025	0.115727	1.02391	0.106883
Gen1__chr12	0.108618	0.111215	1.02391	0.102938
Sik2__chr9	0.107048	0.1096	1.02385	0.101528
Olfr165__chr16	0.107213	0.109762	1.02377	0.101677
Agap3__chr5	0.152732	0.15636	1.02376	0.141656
Rnf125__chr18	0.113809	0.11651	1.02374	0.107583
Cdc25c__chr18	0.111719	0.11437	1.02373	0.105716
Dok7__chr5	0.106974	0.109512	1.02372	0.101462
Cdkl1__chr12	0.107971	0.110527	1.02367	0.102357
Rims2__chr15	0.108933	0.111509	1.02364	0.103221
Ahnak__chr19	0.631733	0.646669	1.02364	0.468396
Pde8b__chr13	0.109557	0.112147	1.02363	0.10378
Gm4925__chr10	0.107908	0.110457	1.02362	0.102301
Pou5f2__chr13	0.117035	0.119793	1.02357	0.110458
Gpatch2l__chr12	0.111395	0.11402	1.02356	0.105426
BC030336__chr7	0.120716	0.123555	1.02352	0.113727
Hand2__chr8	0.128695	0.131719	1.0235	0.120771
Anxa11__chr14	0.148289	0.151767	1.02345	0.137834
Gm16894__chr1	0.107876	0.110402	1.02341	0.102272
Wdr25__chr12	0.109865	0.112434	1.02339	0.104056
Ndor1__chr2	0.121567	0.124404	1.02334	0.114481
Frmd6__chr12	0.139315	0.142566	1.02333	0.130061
Tomm40__chr7	0.200504	0.20517	1.02327	0.181703
Pik3c2a__chr7	0.140634	0.143903	1.02324	0.131207
Rb1cc1__chr1	0.170933	0.174906	1.02324	0.15714
Lrrc3b__chr14	0.114034	0.116682	1.02322	0.107784
Cdc73__chr1	0.127294	0.130248	1.02321	0.119538
Faxc__chr4	0.109667	0.112211	1.0232	0.103879
Polr3h__chr15	0.117905	0.120635	1.02315	0.111231
Gm6607__chr9	0.110553	0.113108	1.02311	0.104672
Arntl2__chr6	0.107029	0.109497	1.02306	0.101511
Mtmr9__chr14	0.114949	0.117599	1.02306	0.1086
Zswim7__chr11	0.121407	0.124202	1.02302	0.114339
Hexdc__chr11	0.109366	0.111879	1.02297	0.103609
Bean1__chr8	0.113088	0.115686	1.02297	0.10694
Zbtb6__chr2	0.116546	0.11922	1.02294	0.110023
Nudt8__chr19	0.145186	0.148512	1.02291	0.135154
Irx1__chr13	0.106974	0.109423	1.0229	0.101462
Coq6__chr12	0.12439	0.127236	1.02288	0.116977
Thra__chr11	0.134416	0.137482	1.0228	0.125788
Cep110__chr2	0.135708	0.138802	1.0228	0.126917
D930015M05Rik__chr2	0.107071	0.109512	1.0228	0.101549
Sox6__chr7	0.115857	0.118495	1.02277	0.109409
Scn4b__chr9	0.114817	0.117429	1.02275	0.108483
2900009J06Rik__chr1	0.107351	0.109791	1.02273	0.101801
Jph4__chr14	0.109004	0.111481	1.02272	0.103284
Filip1__chr9	0.120593	0.123328	1.02268	0.113618
Crebbp__chr16	0.16395	0.167666	1.02267	0.151233
Rhpn2__chr7	0.10798	0.110425	1.02265	0.102365
Prkd2__chr7	0.122849	0.12563	1.02263	0.115615
Kansl1l__chr1	0.11583	0.11845	1.02263	0.109385
Atg9a__chr1	0.133023	0.13603	1.02261	0.124569
Cpsf1__chr15	0.141043	0.144229	1.02259	0.131562
Zscan4a__chr7	0.107341	0.109762	1.02255	0.101792
Sp100__chr1	0.121228	0.123961	1.02255	0.11418
Inadl__chr4	0.111494	0.114007	1.02254	0.105515
Pcdhb7__chr18	0.108396	0.11084	1.02254	0.102739
Shcbp1l__chr1	0.107245	0.109656	1.02248	0.101706
4930474G06Rik__chr18	0.112957	0.115493	1.02245	0.106823
Ntm__chr9	0.107747	0.110164	1.02243	0.102157
Stxbp1__chr2	0.13165	0.134599	1.0224	0.123366
St6galnac3__chr3	0.111941	0.114449	1.0224	0.105915
Cdh12__chr15	0.107941	0.110357	1.02239	0.10233
Casc1__chr6	0.107479	0.109884	1.02238	0.101916
Myo1b__chr1	0.143748	0.146964	1.02237	0.133909
Ppp1r32__chr19	0.10771	0.110119	1.02237	0.102123
Nupl1__chr14	0.118077	0.120717	1.02235	0.111385
Gtf3c3__chr1	0.112222	0.11473	1.02235	0.106166
Pex10__chr4	0.113633	0.116166	1.02229	0.107426
Kifap3__chr1	0.129987	0.132881	1.02227	0.121906
Rragd__chr4	0.123773	0.126529	1.02226	0.116433
Ddx51__chr5	0.117089	0.119695	1.02226	0.110506
Aplp1__chr7	0.114545	0.117093	1.02225	0.10824
Nap1l2__chrX	0.10703	0.109406	1.0222	0.101513
Zfp551__chr7	0.10705	0.109422	1.02216	0.101531
Osbpl6__chr2	0.117592	0.120197	1.02215	0.110953
Hoxc8__chr15	0.107191	0.109564	1.02214	0.101657
Atrx__chrX	0.242016	0.247371	1.02212	0.214982
Aspscr1__chr11	0.130466	0.133345	1.02207	0.122327
Pik3c2b__chr1	0.121395	0.124073	1.02206	0.114328
Wdr18__chr10	0.146013	0.149229	1.02203	0.135868
Rassf10__chr7	0.1081	0.11048	1.02202	0.102473
Mrs2__chr13	0.11379	0.11629	1.02197	0.107566
Camk2a__chr18	0.116563	0.119121	1.02195	0.110038
Cx3cl1__chr8	0.124384	0.127114	1.02195	0.116972
Slc25a32__chr15	0.116678	0.119237	1.02194	0.11014
Add2__chr6	0.108126	0.110497	1.02193	0.102497
Pecr__chr1	0.118399	0.120995	1.02193	0.111671
Ptcd3__chr6	0.167241	0.170903	1.0219	0.154022
Kdm5c__chrX	0.140592	0.14367	1.02189	0.131171
Htra1__chr7	0.155408	0.158803	1.02185	0.14395
Zbtb11__chr16	0.131926	0.134805	1.02182	0.123608
Arhgap27__chr11	0.131702	0.134576	1.02182	0.123411
Vps37d__chr5	0.107999	0.110354	1.0218	0.102383
Coro6__chr11	0.107142	0.109476	1.02178	0.101613
2310050B05Rik__chr10	0.11244	0.114884	1.02174	0.10636
Atp2a1__chr7	0.107579	0.109915	1.02171	0.102006
Syt4__chr18	0.106985	0.109307	1.0217	0.101472
Slc44a5__chr3	0.107756	0.110094	1.0217	0.102164
Wasf1__chr10	0.107975	0.110316	1.02169	0.102361
Mlf1ip__chr8	0.109696	0.112071	1.02165	0.103905
Ptprk__chr10	0.127905	0.130671	1.02162	0.120077
Pradc1__chr6	0.116363	0.118877	1.0216	0.10986
Vipas39__chr12	0.128966	0.131748	1.02157	0.121009
Zfp957__chr14	0.107048	0.109357	1.02157	0.101528
Cdc42bpb__chr12	0.166868	0.170462	1.02154	0.153706
4930402F11Rik__chr7	0.107203	0.109512	1.02153	0.101668
Slc25a19__chr11	0.123495	0.126152	1.02152	0.116186
Ankrd6__chr4	0.108239	0.110567	1.0215	0.102598
4932413F04Rik__chr9	0.106974	0.109274	1.02149	0.101462
Ccdc25__chr14	0.156657	0.160021	1.02148	0.145019
Ptpn13__chr5	0.109431	0.11178	1.02147	0.103667
Trip10__chr17	0.151127	0.15437	1.02146	0.140277
Gorasp1__chr9	0.120123	0.122699	1.02144	0.113201
Hist2h2be__chr3	0.113778	0.116215	1.02142	0.107555
Tars2__chr3	0.142088	0.145122	1.02136	0.132469
Mns1__chr9	0.108674	0.110994	1.02135	0.102988
Fbxo44__chr4	0.109575	0.111915	1.02135	0.103796
4932416H05Rik__chr2	0.109076	0.111402	1.02132	0.103349
Klf5__chr14	0.108142	0.110448	1.02132	0.102511
Pcm1__chr8	0.14342	0.146477	1.02131	0.133625
0610030E20Rik__chr6	0.129945	0.132711	1.02128	0.12187
Nova1__chr12	0.108679	0.110989	1.02126	0.102993
Plcb3__chr19	0.118691	0.121212	1.02124	0.11193
Gm16973__chr14	0.111543	0.113912	1.02124	0.105559
Tctn3__chr19	0.112932	0.115329	1.02122	0.1068
Gxylt2__chr6	0.109615	0.111939	1.02121	0.103832
Itga11__chr9	0.120036	0.122579	1.02119	0.113123
Prl2a1__chr13	0.10701	0.109274	1.02115	0.101495
Manba__chr3	0.130696	0.133459	1.02114	0.122529
Arhgap28__chr17	0.111848	0.114212	1.02114	0.105831
Fam181b__chr7	0.110222	0.11255	1.02113	0.104376
Ankrd52__chr10	0.11185	0.114211	1.02111	0.105833
Spock2__chr10	0.108524	0.110813	1.02109	0.102854
Sh2d1b1__chr1	0.109708	0.112022	1.02109	0.103916
4933428C19Rik__chr4	0.106974	0.109227	1.02106	0.101462
Reg3g__chr6	0.106974	0.109227	1.02106	0.101462
Tacr3__chr3	0.107034	0.109286	1.02104	0.101515
Zfp287__chr11	0.114128	0.116528	1.02104	0.107867
Pigv__chr4	0.117965	0.120444	1.02102	0.111285
Slc35e1__chr8	0.165655	0.169136	1.02101	0.152679
Scyl2__chr10	0.109773	0.112078	1.021	0.103973
Slc35f5__chr1	0.155045	0.158301	1.021	0.14364
5730577I03Rik__chr9	0.116567	0.119014	1.02099	0.110042
Rundc3a__chr11	0.107931	0.110195	1.02098	0.102321
Zmym6__chr4	0.118229	0.120703	1.02093	0.11152
Snord92__chr17	0.106991	0.109227	1.02091	0.101477
Ccbe1__chr18	0.11736	0.119811	1.02089	0.110747
Ccbl2__chr3	0.116847	0.119286	1.02088	0.11029
Hist2h2ac__chr3	0.107119	0.109355	1.02087	0.101592
Trpm2__chr10	0.116954	0.119395	1.02087	0.110386
Rnf183__chr4	0.107231	0.109467	1.02085	0.101693
5330426P16Rik__chr16	0.112567	0.114909	1.0208	0.106474
Zdhhc16__chr19	0.110683	0.112983	1.02078	0.104789
Clcn1__chr6	0.108781	0.11104	1.02076	0.103085
Fgf18__chr11	0.117227	0.119659	1.02075	0.110628
Ccl25__chr8	0.111541	0.113853	1.02073	0.105557
Tmem203__chr2	0.120269	0.122761	1.02072	0.113331
Gm15645__chr7	0.108333	0.110575	1.02069	0.102683
Diap3__chr14	0.114831	0.117205	1.02068	0.108495
Arv1__chr8	0.10945	0.111707	1.02063	0.103684
E030002O03Rik__chr7	0.107083	0.109291	1.02062	0.10156
Ntmt1__chr2	0.126136	0.12873	1.02057	0.118518
Agpat3__chr10	0.193046	0.197011	1.02054	0.175576
eGFP	0.106974	0.109172	1.02054	0.101462
Ablim2__chr5	0.111922	0.11422	1.02053	0.105898
Pold1__chr7	0.128894	0.131539	1.02052	0.120946
Tti1__chr2	0.143946	0.146899	1.02052	0.13408
Lnx2__chr5	0.118849	0.121285	1.02049	0.11207
Accs__chr2	0.109566	0.111809	1.02046	0.103789
Rpl39l__chr16	0.108059	0.11027	1.02046	0.102437
Rdx__chr9	0.26902	0.274523	1.02046	0.2359
4931420L22Rik__chr16	0.108982	0.111212	1.02046	0.103265
Gm13826__chr5	0.128057	0.130674	1.02044	0.12021
Lrrn2__chr1	0.110937	0.113199	1.02039	0.105016
Prss50__chr9	0.108324	0.110531	1.02038	0.102674
Pou5f1__chr17	0.107154	0.109335	1.02035	0.101623
Cul5__chr9	0.143082	0.145989	1.02032	0.133332
Nrg4__chr9	0.109991	0.112225	1.02031	0.104169
C8g__chr2	0.107253	0.109431	1.02031	0.101712
Arpc5l__chr2	0.17228	0.175772	1.02027	0.158274
Tmem51__chr4	0.140989	0.143846	1.02027	0.131515
Tbc1d22b__chr17	0.11371	0.116014	1.02026	0.107495
Zfp518b__chr5	0.116324	0.118679	1.02024	0.109825
Ggnbp1__chr17	0.111159	0.113406	1.02021	0.105215
Tbr1__chr2	0.106974	0.109134	1.02019	0.101462
Hdgfrp2__chr17	0.140367	0.1432	1.02018	0.130975
F11r__chr1	0.21356	0.217868	1.02017	0.192319
Svip__chr7	0.120279	0.122704	1.02016	0.113339
4933412O06Rik__chr13	0.107069	0.109227	1.02016	0.101547
B3galt4__chr17	0.110185	0.112402	1.02012	0.104343
Slc22a3__chr17	0.108572	0.110753	1.02008	0.102897
1700019M22Rik__chr12	0.107921	0.110088	1.02008	0.102313
Cd79b__chr11	0.109285	0.111479	1.02007	0.103536
Mei1__chr15	0.107067	0.109215	1.02006	0.101545
Zfp446__chr7	0.114489	0.116784	1.02005	0.10819
Rgs9bp__chr7	0.109803	0.112004	1.02005	0.104
Casp3__chr8	0.109093	0.11128	1.02004	0.103365
Coro2b__chr9	0.123308	0.125777	1.02002	0.116021
Irx2__chr13	0.111335	0.113564	1.02002	0.105372
Fev__chr1	0.107057	0.109198	1.02	0.101536
Dnahc17__chr11	0.107355	0.109501	1.01999	0.101804
Vmn2r29__chr7	0.112059	0.114299	1.01999	0.10602
Actr6__chr10	0.113905	0.116174	1.01992	0.107669
Birc6__chr17	0.190245	0.194028	1.01988	0.173263
Bdnf__chr2	0.120792	0.12319	1.01985	0.113794
Aak1__chr6	0.154388	0.157451	1.01984	0.143076
Adad1__chr3	0.107235	0.109361	1.01983	0.101696
Nlrp10__chr7	0.11492	0.117197	1.01982	0.108574
Knstrn__chr2	0.120335	0.122715	1.01978	0.113389
Snord15b__chr7	0.107109	0.109227	1.01978	0.101583
Snrk__chr9	0.254112	0.259138	1.01978	0.224422
Isoc2b__chr7	0.114071	0.116325	1.01976	0.107817
Phf19__chr2	0.10977	0.111936	1.01973	0.103971
Naa40__chr19	0.124831	0.127289	1.0197	0.117366
Prrg4__chr2	0.11008	0.112247	1.01969	0.104249
Slc8a2__chr7	0.106974	0.10908	1.01968	0.101462
Cadm4__chr7	0.111197	0.113385	1.01968	0.105248
Cdc37l1__chr19	0.135281	0.137941	1.01967	0.126543
Vsnl1__chr12	0.10708	0.109185	1.01966	0.101557
Adipor2__chr6	0.178816	0.182318	1.01959	0.163759
Pcdhb11__chr18	0.107411	0.109515	1.01958	0.101855
B3gnt5__chr16	0.112743	0.11495	1.01958	0.106631
2010315B03Rik__chr9	0.112765	0.114973	1.01958	0.106651
Klf8__chrX	0.108159	0.110274	1.01955	0.102526
9030624G23Rik__chr12	0.115554	0.117813	1.01955	0.10914
Pacrgl__chr5	0.111777	0.113958	1.01951	0.105768
Card6__chr15	0.112478	0.114672	1.0195	0.106395
Ocrl__chrX	0.122949	0.125346	1.01949	0.115704
6820408C15Rik__chr2	0.108304	0.110413	1.01947	0.102656
Rnf152__chr1	0.115744	0.117996	1.01946	0.109309
4930529C04Rik__chr3	0.106974	0.109054	1.01944	0.101462
Kremen1__chr11	0.144906	0.14772	1.01942	0.134912
Col25a1__chr3	0.107271	0.109353	1.01941	0.101729
Kdm1b__chr13	0.113427	0.115628	1.01941	0.107242
1700003P14Rik__chr13	0.10749	0.109575	1.0194	0.101925
Mut__chr17	0.153707	0.156688	1.0194	0.142492
Magix__chrX	0.111981	0.114144	1.01932	0.10595
D930048N14Rik__chr11	0.108967	0.111068	1.01928	0.103252
Bach2__chr4	0.115969	0.118202	1.01925	0.109509
AA415398__chr4	0.108283	0.110368	1.01925	0.102638
Rnf2__chr1	0.138488	0.141153	1.01924	0.129341
2310042D19Rik__chr4	0.190836	0.194507	1.01923	0.173752
Plch1__chr3	0.107692	0.109762	1.01922	0.102107
Zfp457__chr13	0.107477	0.109542	1.01921	0.101914
Sema3a__chr5	0.112764	0.11493	1.01921	0.10665
Deb1__chr9	0.142735	0.145473	1.01918	0.133031
Fam13b__chr18	0.115219	0.117427	1.01917	0.108841
Cldn7__chr11	0.107053	0.109101	1.01913	0.101533
Dpf3__chr12	0.107779	0.10984	1.01912	0.102185
Gm15663__chr10	0.118888	0.121161	1.01912	0.112105
2810454H06Rik__chr6	0.109399	0.11149	1.01911	0.103639
Setd2__chr9	0.159052	0.162089	1.0191	0.147064
Elmod3__chr6	0.112887	0.115038	1.01906	0.10676
Aldob__chr4	0.108392	0.110457	1.01905	0.102735
Pcdhga7__chr18	0.106974	0.109009	1.01902	0.101462
Rhag__chr17	0.107226	0.109264	1.01901	0.101688
Atp6v1g2__chr17	0.109813	0.111901	1.01901	0.10401
Gas2l3__chr10	0.125106	0.12748	1.01898	0.117609
Catsper2__chr2	0.109791	0.111871	1.01894	0.10399
1700025G04Rik__chr1	0.15246	0.155348	1.01894	0.141423
Tfap2d__chr1	0.107332	0.109361	1.01891	0.101783
C430002E04Rik__chr3	0.107975	0.110017	1.01891	0.102361
Chst4__chr8	0.107112	0.109129	1.01883	0.101586
Rasd1__chr11	0.111324	0.113418	1.01881	0.105362
Celf4__chr18	0.11524	0.117407	1.01881	0.10886
Bcl6b__chr11	0.136269	0.138829	1.01879	0.127406
C630020P19Rik__chr2	0.10753	0.109548	1.01877	0.101962
Gja4__chr4	0.121123	0.123393	1.01874	0.114087
Fam35a__chr14	0.113359	0.11548	1.01872	0.107181
Ptpru__chr4	0.10838	0.110404	1.01868	0.102724
A130049A11Rik__chr3	0.10759	0.1096	1.01868	0.102016
Chad__chr11	0.106991	0.108989	1.01868	0.101477
Fgd6__chr10	0.116419	0.118584	1.01859	0.10991
E330034G19Rik__chr14	0.107222	0.1092	1.01844	0.101685
Ift57__chr16	0.118715	0.1209	1.0184	0.111952
Dhcr7__chr7	0.119297	0.12149	1.01838	0.112468
Shroom4__chrX	0.107083	0.10905	1.01837	0.101559
BC035044__chr6	0.108482	0.110475	1.01837	0.102816
B230209K01Rik__chr1	0.107965	0.109947	1.01836	0.102352
Rnaset2b__chr17	0.107351	0.109314	1.01829	0.101801
Ercc6l__chrX	0.109549	0.111552	1.01828	0.103773
Wtip__chr7	0.122295	0.12453	1.01827	0.115126
Tesc__chr5	0.139604	0.142149	1.01823	0.130312
Uevld__chr7	0.113769	0.115839	1.0182	0.107547
Mtmr1__chrX	0.122765	0.124999	1.01819	0.115542
Haao__chr17	0.10928	0.111267	1.01818	0.103532
Txndc12__chr4	0.170383	0.173479	1.01817	0.156676
Zbtb46__chr2	0.109577	0.111568	1.01817	0.103798
Mrpl53__chr6	0.153654	0.156445	1.01817	0.142447
Pigg__chr5	0.108673	0.110645	1.01815	0.102987
Layn__chr9	0.116463	0.118576	1.01815	0.109949
Foxn3__chr12	0.133243	0.135659	1.01813	0.124761
Aldoc__chr11	0.111493	0.113514	1.01812	0.105514
Jag2__chr12	0.114006	0.116071	1.01812	0.107759
Akap11__chr14	0.14406	0.146665	1.01808	0.134179
Lingo3__chr10	0.114094	0.116153	1.01805	0.107837
Rdh10__chr1	0.124496	0.126741	1.01803	0.117071
Gm16197__chr17	0.107707	0.109649	1.01803	0.10212
Themis__chr10	0.10742	0.109355	1.01801	0.101863
Zhx2__chr15	0.11637	0.118466	1.01801	0.109866
Plcb4__chr2	0.128065	0.130371	1.01801	0.120217
2010111I01Rik__chr13	0.118022	0.120146	1.018	0.111336
Dpysl4__chr7	0.108447	0.110397	1.01798	0.102784
Gstm7__chr3	0.1139	0.115942	1.01793	0.107664
E330011O21Rik__chr16	0.107803	0.109735	1.01792	0.102207
Zeb1__chr18	0.163938	0.166871	1.01789	0.151222
Tmem14a__chr1	0.109879	0.111844	1.01787	0.104069
Slc36a4__chr9	0.107971	0.109897	1.01784	0.102357
Lrrtm4__chr6	0.108128	0.110056	1.01783	0.102498
Fchsd1__chr18	0.11084	0.112812	1.01779	0.10493
Adam22__chr5	0.109424	0.111367	1.01775	0.103661
Mier2__chr10	0.117967	0.120061	1.01775	0.111287
Acsl3__chr1	0.118894	0.121004	1.01774	0.112111
Nicn1__chr9	0.119733	0.121856	1.01773	0.112855
C87436__chr6	0.115093	0.117131	1.01771	0.108729
Gpatch3__chr4	0.115619	0.117665	1.01769	0.109198
4732415M23Rik__chr8	0.108325	0.110241	1.01769	0.102675
1810043G02Rik__chr10	0.113142	0.115141	1.01767	0.106988
Coa5__chr1	0.21486	0.218653	1.01765	0.193368
Lhx2__chr2	0.107364	0.109258	1.01765	0.101812
Zbtb9__chr17	0.114014	0.116024	1.01763	0.107766
Fam19a5__chr15	0.113256	0.115252	1.01762	0.10709
Wdr67__chr15	0.115344	0.117375	1.0176	0.108953
Lrp2__chr2	0.107826	0.109723	1.0176	0.102227
Top1mt__chr15	0.110339	0.112281	1.0176	0.104481
Aif1l__chr2	0.108648	0.110559	1.01759	0.102965
Smco1__chr16	0.109701	0.111627	1.01755	0.103909
Apol7d__chr1	0.107674	0.109562	1.01754	0.102091
Sfrp2__chr3	0.148372	0.150971	1.01751	0.137905
Coprs__chr8	0.117687	0.119748	1.01751	0.111038
Mreg__chr1	0.118466	0.120536	1.01747	0.11173
Phldb2__chr16	0.164516	0.16739	1.01747	0.151713
Tgfb2__chr1	0.121905	0.124031	1.01744	0.11478
A630010A05Rik__chr16	0.108112	0.109997	1.01744	0.102484
Amigo2__chr15	0.111247	0.113185	1.01742	0.105294
St8sia5__chr18	0.106974	0.108834	1.01739	0.101462
Iqce__chr5	0.113167	0.115133	1.01737	0.10701
Sh3rf2__chr18	0.110603	0.112522	1.01736	0.104717
Olfr1424__chr19	0.106974	0.10883	1.01735	0.101462
Maob__chrX	0.113882	0.115857	1.01734	0.107648
Ttc37__chr13	0.111148	0.11307	1.01729	0.105205
Ifitm10__chr7	0.107373	0.109227	1.01727	0.101821
4930440C22Rik__chr1	0.108092	0.109958	1.01726	0.102466
Spry4__chr18	0.120959	0.123044	1.01724	0.113942
4930563E18Rik__chr18	0.107053	0.108898	1.01723	0.101533
9330162B11Rik__chr1	0.106974	0.108816	1.01722	0.101462
Pnliprp2__chr19	0.106974	0.108816	1.01722	0.101462
Prss58__chr6	0.106974	0.108816	1.01722	0.101462
Vmn2r51__chr7	0.106974	0.108816	1.01722	0.101462
Tmem38b__chr4	0.12985	0.132074	1.01713	0.121786
Dcaf13__chr15	0.148557	0.151102	1.01713	0.138065
Car5a__chr8	0.113259	0.115197	1.01711	0.107092
Rhbdl1__chr17	0.108517	0.110371	1.01708	0.102848
Tsen2__chr6	0.113734	0.115676	1.01707	0.107516
Dcbld1__chr10	0.117277	0.119279	1.01707	0.110673
Grik4__chr9	0.106981	0.108806	1.01706	0.101468
Fam229b__chr10	0.109379	0.111243	1.01704	0.103621
Cped1__chr6	0.117572	0.119575	1.01703	0.110936
Ttbk1__chr17	0.108682	0.110533	1.01702	0.102996
Rpgrip1l__chr8	0.111476	0.113374	1.01702	0.105499
5031425E22Rik__chr5	0.121321	0.123386	1.01702	0.114263
Edn1__chr13	0.117561	0.119557	1.01698	0.110926
Gm20139__chr10	0.107085	0.108897	1.01692	0.101562
Stx1a__chr5	0.112275	0.114174	1.01692	0.106213
Mthfs__chr9	0.108059	0.109886	1.01691	0.102436
Pigb__chr9	0.107432	0.109248	1.01691	0.101873
Gm10439__chrX	0.106974	0.108781	1.01689	0.101462
Prss21__chr17	0.106974	0.108781	1.01689	0.101462
Bend4__chr5	0.111282	0.113162	1.01689	0.105325
Ppih__chr4	0.117015	0.118991	1.01689	0.11044
L3hypdh__chr12	0.109276	0.11112	1.01688	0.103528
Fgf9__chr14	0.113125	0.115033	1.01686	0.106973
Ap4e1__chr2	0.127902	0.130057	1.01685	0.120074
Foxq1__chr13	0.107024	0.108827	1.01685	0.101507
Cenpt__chr8	0.119603	0.121614	1.01681	0.11274
Lig4__chr8	0.115275	0.117213	1.01681	0.108891
Nek4__chr14	0.110305	0.112157	1.01679	0.10445
Ifna7__chr4	0.106974	0.10877	1.01679	0.101462
Ppm1e__chr11	0.110679	0.112536	1.01678	0.104785
Pik3r6__chr11	0.126133	0.128248	1.01676	0.118516
Sumf2__chr5	0.115305	0.117237	1.01676	0.108917
Tox3__chr8	0.107548	0.10935	1.01676	0.101978
Abcc8__chr7	0.124393	0.126477	1.01675	0.11698
Epha7__chr4	0.11743	0.119391	1.01669	0.11081
Ptprz1__chr6	0.107395	0.109187	1.01668	0.10184
Trim45__chr3	0.108256	0.110055	1.01662	0.102613
Plau__chr14	0.116309	0.118238	1.01659	0.109812
Lrrc8c__chr5	0.11636	0.118289	1.01658	0.109857
Larp1b__chr3	0.145745	0.14816	1.01657	0.135637
1700018L02Rik__chr19	0.107234	0.10901	1.01656	0.101695
Itfg3__chr17	0.182353	0.185372	1.01655	0.166712
Cntn3__chr6	0.107217	0.108989	1.01652	0.10168
Exosc9__chr3	0.113903	0.115785	1.01652	0.107668
Ttll6__chr11	0.107424	0.109198	1.01652	0.101866
Nr3c2__chr8	0.107106	0.108873	1.0165	0.10158
1810053B23Rik__chr16	0.107009	0.108772	1.01648	0.101493
Lmod1__chr1	0.110737	0.11256	1.01646	0.104837
Mrps25__chr6	0.143219	0.145575	1.01646	0.13345
Tet1__chr10	0.11301	0.114869	1.01645	0.10687
Gm19710__chr3	0.107069	0.10883	1.01645	0.101548
Pinx1__chr14	0.119578	0.121544	1.01643	0.112718
Ttll7__chr3	0.109176	0.110969	1.01642	0.103438
Scfd2__chr5	0.117708	0.119641	1.01642	0.111057
Ceacam16__chr7	0.108291	0.110068	1.0164	0.102645
Cdyl__chr13	0.12485	0.126897	1.0164	0.117383
Kcnj15__chr16	0.113418	0.115277	1.0164	0.107234
Chac2__chr11	0.114138	0.116006	1.01636	0.107877
Gip__chr11	0.106974	0.108724	1.01635	0.101462
Tmem87b__chr2	0.145404	0.147782	1.01635	0.135342
Adnp__chr2	0.150173	0.152629	1.01635	0.139457
Gdpgp1__chr7	0.110853	0.112666	1.01635	0.104941
Mrps34__chr17	0.14303	0.145369	1.01635	0.133287
5430437J10Rik__chr15	0.109446	0.111235	1.01635	0.10368
Slc4a1ap__chr5	0.129063	0.131168	1.01631	0.121095
Lancl3__chrX	0.108206	0.109969	1.01629	0.102569
Rpusd4__chr9	0.116665	0.118564	1.01628	0.110128
Clec14a__chr12	0.134196	0.13638	1.01628	0.125595
4931408C20Rik__chr1	0.108588	0.110354	1.01626	0.102911
Psmd10__chrX	0.127516	0.129588	1.01625	0.119734
Fignl2__chr15	0.110588	0.112382	1.01622	0.104704
Dnph1__chr17	0.116802	0.118694	1.0162	0.110251
Sel1l2__chr2	0.107039	0.108769	1.01616	0.101521
C1qtnf7__chr5	0.11094	0.112733	1.01616	0.105019
Fbxo6__chr4	0.143288	0.145603	1.01616	0.13351
Olfr1031__chr2	0.107873	0.109614	1.01614	0.102269
Sirt5__chr13	0.116782	0.118666	1.01614	0.110233
Zfp87__chr13	0.11227	0.114081	1.01613	0.106209
Gm6756__chr18	0.108217	0.109961	1.01612	0.102579
Rmnd5b__chr11	0.136031	0.138222	1.01611	0.127199
Rab37__chr11	0.107116	0.108841	1.0161	0.101589
Polb__chr8	0.131583	0.133702	1.0161	0.123307
Hoxd1__chr2	0.106974	0.108697	1.0161	0.101462
Adck1__chr12	0.120566	0.122502	1.01606	0.113594
Itgb6__chr2	0.115586	0.117441	1.01605	0.109168
Ephx3__chr17	0.109204	0.110956	1.01604	0.103464
Atp5k__chr5	0.506385	0.514503	1.01603	0.397384
Fhl1__chrX	0.192093	0.195172	1.01602	0.17479
Art2a-ps__chr7	0.107111	0.108823	1.01598	0.101585
Cd247__chr1	0.107436	0.109151	1.01596	0.101877
Trdmt1__chr2	0.113872	0.115685	1.01592	0.107639
1700101I11Rik__chr6	0.107124	0.108828	1.01591	0.101596
Hdhd2__chr18	0.129661	0.131721	1.01589	0.12162
Nphs1__chr7	0.111459	0.113229	1.01588	0.105483
Parpbp__chr10	0.111288	0.113055	1.01588	0.10533
Nkg7__chr7	0.106974	0.108672	1.01587	0.101462
A330102I10Rik__chr13	0.106974	0.108667	1.01582	0.101462
Cbx8__chr11	0.112707	0.114488	1.01581	0.106599
Tpd52l1__chr10	0.107374	0.109069	1.01579	0.101821
Lrrc28__chr7	0.113685	0.115478	1.01578	0.107472
Ckap2__chr8	0.12863	0.130659	1.01578	0.120714
Ankrd37__chr8	0.120852	0.122758	1.01577	0.113847
Mybpc2__chr7	0.109579	0.111304	1.01575	0.1038
Oas1e__chr5	0.106974	0.108658	1.01574	0.101462
P4ha2__chr11	0.149458	0.151807	1.01572	0.138841
Mrps27__chr13	0.140509	0.142716	1.0157	0.131099
Fmo5__chr3	0.114829	0.116631	1.0157	0.108493
March9__chr10	0.1085	0.110203	1.0157	0.102833
Gm4832__chr17	0.108942	0.110648	1.01566	0.103229
Gm12216__chr11	0.107866	0.109554	1.01566	0.102263
Cdc42bpa__chr1	0.131305	0.13336	1.01565	0.123063
Zfp389__chr13	0.107019	0.108693	1.01565	0.101502
Cnot10__chr9	0.127365	0.129357	1.01564	0.119601
Fbxw10__chr11	0.107709	0.109391	1.01561	0.102122
Wnt5b__chr6	0.109196	0.110901	1.01561	0.103457
Grasp__chr15	0.126057	0.128023	1.01559	0.118449
Nudt2__chr4	0.123492	0.125415	1.01558	0.116184
Gm2381__chr7	0.10827	0.109956	1.01557	0.102626
Slc9a5__chr8	0.109331	0.111034	1.01557	0.103578
Clec11a__chr7	0.121162	0.123043	1.01552	0.114122
Car11__chr7	0.111885	0.11362	1.01551	0.105864
Psme4__chr11	0.265667	0.269786	1.0155	0.233334
Wscd2__chr5	0.107074	0.108734	1.0155	0.101552
Dnd1__chr18	0.108325	0.110001	1.01547	0.102675
Scn2a1__chr2	0.108255	0.109928	1.01546	0.102612
Vkorc1l1__chr5	0.118787	0.120616	1.0154	0.112015
Tmem116__chr5	0.110922	0.112629	1.01539	0.105003
U2surp__chr9	0.189257	0.192163	1.01535	0.172446
Etaa1__chr11	0.115617	0.117392	1.01535	0.109196
Gsdma__chr11	0.109643	0.111325	1.01534	0.103857
Trhr__chr15	0.108328	0.109986	1.01531	0.102678
Adig__chr2	0.10705	0.108689	1.01531	0.10153
Gm6792__chr7	0.106995	0.108632	1.0153	0.10148
Rsad1__chr11	0.113466	0.115202	1.0153	0.107277
Cnga1__chr5	0.108304	0.109961	1.0153	0.102656
Enox1__chr14	0.108264	0.10992	1.01529	0.102621
Dock6__chr9	0.132135	0.134152	1.01527	0.123791
Fxyd7__chr7	0.107464	0.109103	1.01526	0.101902
Nek1__chr8	0.111474	0.113175	1.01526	0.105497
Golga3__chr5	0.123854	0.125742	1.01524	0.116504
Wrb__chr16	0.128396	0.130351	1.01523	0.120508
Amtn__chr5	0.1074	0.109034	1.01521	0.101845
Creg2__chr1	0.117385	0.119161	1.01513	0.110769
Ift80__chr3	0.112122	0.113812	1.01508	0.106076
Zfp652__chr11	0.112924	0.114625	1.01506	0.106793
Zfp407__chr18	0.120514	0.122329	1.01506	0.113548
Pde4c__chr8	0.112171	0.113854	1.01501	0.10612
G630090E17Rik__chr10	0.108173	0.109796	1.01501	0.102539
Astn2__chr4	0.107166	0.108773	1.01499	0.101635
Nim1__chr13	0.110384	0.112039	1.01499	0.104521
Sag__chr1	0.107112	0.108717	1.01498	0.101586
Zfp445__chr9	0.170016	0.17256	1.01496	0.156366
9230116N13Rik__chr1	0.107391	0.108997	1.01496	0.101836
Pdp1__chr4	0.123894	0.125743	1.01493	0.116539
Cnnm4__chr1	0.11567	0.117396	1.01493	0.109242
Il34__chr8	0.107224	0.108823	1.01491	0.101686
Sprtn__chr8	0.107865	0.109469	1.01486	0.102263
Syt13__chr2	0.108448	0.110059	1.01485	0.102786
Etv2__chr7	0.107043	0.108632	1.01484	0.101524
Ccdc93__chr1	0.116492	0.118218	1.01482	0.109974
Chek2__chr5	0.126648	0.128522	1.01479	0.11897
Leng1__chr7	0.118991	0.12075	1.01478	0.112197
Jmy__chr13	0.134823	0.136813	1.01476	0.126143
Cnksr3__chr10	0.112703	0.114366	1.01476	0.106596
Itpr3__chr17	0.121434	0.123225	1.01475	0.114363
Plekha5__chr6	0.116652	0.118369	1.01473	0.110117
Wdr35__chr12	0.11407	0.115749	1.01472	0.107816
Fgf13__chrX	0.117347	0.119073	1.01471	0.110735
Etnk1__chr6	0.15091	0.153129	1.01471	0.14009
6030407O03Rik__chr1	0.107727	0.109307	1.01466	0.102138
Srpk1__chr17	0.135619	0.137604	1.01464	0.126839
Sox11__chr12	0.10767	0.109242	1.0146	0.102087
Rhbdd3__chr11	0.117967	0.119688	1.01459	0.111287
Coro7__chr16	0.126165	0.128003	1.01457	0.118544
Dytn__chr1	0.106974	0.10853	1.01454	0.101462
Zfyve1__chr12	0.115878	0.117562	1.01453	0.109428
Glce__chr9	0.121185	0.122944	1.01451	0.114142
Sall1__chr8	0.109552	0.111141	1.0145	0.103776
Gm10548__chr18	0.110662	0.112266	1.0145	0.10477
Maats1__chr16	0.107085	0.108637	1.01449	0.101562
Tgif2__chr2	0.10942	0.111002	1.01446	0.103657
Ndufaf4__chr4	0.165074	0.167459	1.01445	0.152186
Baalc__chr15	0.109017	0.110592	1.01444	0.103296
Rfx2__chr17	0.111704	0.113314	1.01441	0.105702
Nkx3-1__chr14	0.108485	0.110048	1.0144	0.102819
Ap1ar__chr3	0.116418	0.118094	1.0144	0.109908
Ush1g__chr11	0.107825	0.109377	1.01439	0.102226
Gm101__chr1	0.106974	0.108513	1.01438	0.101462
Olfr670__chr7	0.106974	0.108513	1.01438	0.101462
Pvrl4__chr1	0.109058	0.110624	1.01435	0.103333
F2rl1__chr13	0.109507	0.111074	1.01432	0.103735
Zc3hav1__chr6	0.124157	0.125931	1.01429	0.116771
Ankmy2__chr12	0.127049	0.128862	1.01427	0.119322
[truncated: 17,498 more rows]

## Sheet: Cluster 4
CLUSTER 4
GENEID	mean non cluster	mean cluster	fold change	p value
Actc1__chr2	2.31368	15.9507	6.8941	3.54571e-09
Pln__chr10	0.592259	4.04352	6.82729	0.000370935
Myl2__chr5	1.75689	10.8795	6.1925	2.4471e-06
Tpm1__chr9	1.55015	9.51084	6.13545	5.36886e-06
Mb__chr15	2.47501	14.6402	5.91521	5.89659e-08
Hspb7__chr4	0.259985	1.53055	5.88706	0.0284692
Fabp3__chr4	0.505777	2.86506	5.66467	0.0148207
Myoz2__chr3	0.199195	1.11947	5.61994	0.0173893
Tnnc1__chr14	0.327874	1.81682	5.54122	0.043325
Slc25a4__chr8	1.66469	9.13093	5.48506	9.88657e-06
Tnni3__chr7	0.927638	4.96375	5.35096	0.0026596
Des__chr1	0.479546	2.56533	5.34949	0.0128765
Myl3__chr9	1.01152	5.37966	5.31839	0.000627757
Csrp3__chr7	0.244938	1.27583	5.2088	0.0255182
Ckmt2__chr13	0.287423	1.48705	5.17372	0.0341796
Cryab__chr9	0.811161	4.14596	5.11114	0.00149487
Chchd10__chr10	0.208169	1.04091	5.00032	0.0188802
Fhl2__chr1	0.254273	1.2569	4.94312	0.0273335
Nppa__chr4	0.225505	1.10387	4.89512	0.0219058
Ankrd1__chr19	0.387162	1.88837	4.87747	0.0581406
Uqcrfs1__chr13	0.297583	1.44589	4.85877	0.0363977
Tcap__chr11	0.321652	1.50722	4.68587	0.0418648
Ndrg2__chr14	0.339227	1.58543	4.67366	0.0460377
Hspb6__chr7	0.277411	1.28603	4.63583	0.0320478
Cox7a1__chr7	0.184823	0.856163	4.63235	0.168772
Atp5g1__chr11	0.451568	2.0757	4.59666	0.0109739
Cox5a__chr9	0.393445	1.7905	4.55082	0.0598006
Mdh1__chr11	0.398672	1.8073	4.53329	0.0611938
Trp53inp2__chr2	0.230019	1.03426	4.49642	0.0227246
Tnnt2__chr1	2.3215	10.3257	4.44783	3.15764e-05
Mybpc3__chr2	0.471886	2.08107	4.41012	0.0123381
Eef1a2__chr2	0.243334	1.05276	4.3264	0.0252115
Ldhb__chr6	0.327848	1.41336	4.31103	0.0433189
Ckm__chr7	0.367452	1.57256	4.27963	0.0530413
Map1lc3a__chr2	0.156992	0.663632	4.22717	0.145309
Smpx__chrX	0.143382	0.60194	4.19816	0.133595
S100a1__chr3	0.237572	0.993632	4.18245	0.211491
Rcan2__chr17	0.135925	0.555333	4.08558	0.127109
Atp5c1__chr2	0.458187	1.85362	4.04556	0.0777987
Acta1__chr8	0.120523	0.486807	4.03913	0.113558
Acadm__chr3	0.204317	0.809107	3.96006	0.184823
Got1__chr19	0.250821	0.989582	3.94537	0.221871
Cox6a2__chr7	1.30588	5.08305	3.89242	0.00227253
Pgam2__chr11	0.152031	0.591132	3.88823	0.141058
Fndc5__chr4	0.192777	0.744766	3.86335	0.175359
Chchd3__chr6	0.129608	0.500241	3.85966	0.121576
Myom2__chr8	0.180353	0.694924	3.85313	0.165048
Pdlim5__chr3	0.237649	0.915689	3.85311	0.211552
Tuba4a__chr1	0.17792	0.685366	3.85209	0.163014
Hadhb__chr5	0.311247	1.19247	3.83127	0.0394653
Atp5g3__chr2	0.809606	3.09923	3.82807	0.00944083
Ldb3__chr14	0.194572	0.736034	3.78284	0.176838
Acot13__chr13	0.141691	0.530824	3.74636	0.132128
Eno3__chr11	0.285324	1.06724	3.74045	0.0337282
Gbas__chr5	0.192472	0.718853	3.73484	0.175108
Ndufab1__chr7	0.244162	0.905939	3.7104	0.216672
Atp5b__chr10	0.980184	3.62421	3.69748	0.0177773
Ndufs2__chr1	0.283775	1.04895	3.69641	0.0333967
Cox7b__chrX	0.341664	1.2552	3.67378	0.0466281
Myh6__chr14	3.2518	11.9112	3.66295	0.000147336
Crip2__chr12	0.442863	1.61524	3.64726	0.0733988
Jph2__chr2	0.126835	0.46249	3.64639	0.119137
Atp2a2__chr5	3.95865	14.4258	3.64412	1.72852e-05
Ppif__chr14	0.124436	0.453313	3.64293	0.117021
Idh3b__chr2	0.288835	1.03814	3.59423	0.0344846
Ndufc1__chr3	0.236937	0.85145	3.59357	0.210991
Aco2__chr15	0.394894	1.40933	3.56887	0.0601857
Ech1__chr7	0.274465	0.977596	3.56183	0.240058
Acadl__chr1	0.312919	1.11265	3.55572	0.0398472
Dmpk__chr7	0.179449	0.636434	3.5466	0.164293
Cycs__chr6	0.509573	1.79174	3.51616	0.0931212
Atp5h__chr11	0.561755	1.96733	3.50212	0.109478
Uqcrc1__chr9	0.335629	1.16821	3.48064	0.0451715
Myom1__chr17	0.27898	0.963253	3.45277	0.243482
Rpl3l__chr17	0.111809	0.384507	3.43896	0.105799
Hspb1__chr5	0.279858	0.960386	3.43169	0.244147
Acaa2__chr18	0.226092	0.770751	3.40902	0.202385
Cox8b__chr7	0.152156	0.517325	3.39996	0.141165
Sdhb__chr4	0.254446	0.864066	3.39587	0.224688
Pde4dip__chr3	0.233962	0.794055	3.39395	0.208639
Sod2__chr17	0.213105	0.721647	3.38635	0.191956
Coq10a__chr10	0.128007	0.431301	3.36936	0.120169
Pdha1__chrX	0.2456	0.824553	3.3573	0.217797
Uqcrc2__chr7	0.241719	0.810947	3.35492	0.214755
Ndufb10__chr17	0.208657	0.694325	3.3276	0.188353
Pfkm__chr15	0.154523	0.514132	3.32721	0.143196
Ndufa12__chr10	0.28205	0.935451	3.31661	0.245802
Atp5a1__chr18	0.795146	2.62534	3.30171	0.0467091
Vegfb__chr19	0.158475	0.523096	3.30082	0.146576
Ndrg4__chr8	0.127962	0.419725	3.28006	0.12013
Oxct1__chr15	0.342933	1.12244	3.27306	0.0469365
Atp5d__chr10	0.330395	1.08131	3.27277	0.0439222
Atp5o__chr16	0.379882	1.2432	3.27259	0.056238
Ccng1__chr11	0.227231	0.741596	3.26362	0.203293
Cyc1__chr15	0.258228	0.841243	3.25775	0.227615
Mpc2__chr1	0.204133	0.664033	3.25295	0.184672
Pygm__chr19	0.276986	0.898238	3.24291	0.241972
Mlf1__chr3	0.0992992	0.320747	3.2301	0.0945405
Sucla2__chr14	0.180785	0.583464	3.22739	0.165408
Dynll2__chr11	0.189053	0.60937	3.22327	0.172282
Actn2__chr13	0.251635	0.805177	3.19978	0.222505
Idh2__chr7	0.257568	0.8229	3.19489	0.227105
Uqcrq__chr11	0.41783	1.33151	3.18672	0.0663934
Mrpl42__chr10	0.180404	0.574673	3.18548	0.16509
Pdhb__chr14	0.172842	0.550275	3.18369	0.158751
Popdc2__chr16	0.205455	0.653295	3.17974	0.18575
Coq9__chr8	0.13155	0.418118	3.1784	0.123281
Eci1__chr17	0.170102	0.540429	3.1771	0.156443
Hopx__chr5	0.159037	0.503566	3.16634	0.147056
Slc25a3__chr10	0.498388	1.56696	3.14406	0.0897155
Cox5b__chr1	0.359813	1.13067	3.14237	0.0511104
Hspb8__chr5	0.219778	0.688059	3.13071	0.197331
Ndufb9__chr15	0.254937	0.797287	3.12738	0.225069
Ndufb5__chr3	0.262349	0.819968	3.12549	0.230792
Cox4i1__chr8	0.638772	1.99549	3.12394	0.134833
Atp5j__chr16	0.391885	1.22286	3.12046	0.0593868
Cs__chr10	0.388753	1.21188	3.11736	0.0585594
Ank1__chr8	0.131024	0.408282	3.1161	0.122819
Ndufv2__chr17	0.219523	0.67881	3.0922	0.197127
Uqcrh__chr4	0.247015	0.761043	3.08096	0.218904
Etfa__chr9	0.194273	0.597932	3.07779	0.176592
Cox6c__chr15	0.422242	1.2977	3.07335	0.067611
Ecsit__chr9	0.110209	0.337898	3.06598	0.104367
Phyh__chr2	0.155938	0.477944	3.06497	0.144407
Adprhl1__chr8	0.162276	0.497019	3.06281	0.149814
Trdn__chr10	0.205934	0.630728	3.06277	0.18614
Hfe2__chr3	0.152905	0.467822	3.05956	0.141808
Ndufa10__chr1	0.19329	0.58941	3.04935	0.175782
Ptgds__chr2	0.270768	0.825097	3.04724	0.237243
Ak1__chr2	0.185499	0.561461	3.02677	0.169334
Ndufa4__chr6	0.313363	0.946381	3.02007	0.269058
Myzap__chr9	0.108556	0.32719	3.01403	0.102884
Mfn2__chr4	0.230738	0.69458	3.01026	0.206083
Pygb__chr2	0.164832	0.493507	2.994	0.151985
Lrrc2__chr9	0.177979	0.532764	2.9934	0.163063
Usmg5__chr19	0.231949	0.693504	2.9899	0.207044
Ndufv1__chr19	0.202963	0.606648	2.98896	0.183718
Atp5f1__chr3	0.222622	0.659568	2.96273	0.199612
Aes__chr10	0.393122	1.16377	2.96032	0.0597147
Gm5595__chr7	0.213508	0.631041	2.95559	0.192282
Trim63__chr4	0.109552	0.323518	2.95309	0.103778
Casq2__chr3	0.454956	1.34288	2.95168	0.0768641
Ndufa5__chr6	0.197605	0.582045	2.94549	0.179332
Idh3a__chr9	0.166666	0.490577	2.94348	0.153539
Atp5k__chr5	0.316701	0.926488	2.92544	0.271494
Adck3__chr1	0.118687	0.34655	2.91987	0.111929
Dlat__chr9	0.132312	0.386304	2.91964	0.123949
Lpl__chr8	2.00985	5.85327	2.9123	0.01688
Mpc1__chr17	0.160671	0.464189	2.88906	0.148449
Nrap__chr19	0.127271	0.367664	2.88883	0.119521
Pdk2__chr11	0.135062	0.389904	2.88686	0.126355
Uqcrb__chr13	0.241067	0.69239	2.87219	0.214243
Cox6b1__chr7	0.336431	0.965612	2.87017	0.28573
Sorbs1__chr19	0.208021	0.596262	2.86635	0.187837
Macrod1__chr19	0.111371	0.318617	2.86085	0.105407
Ndufs7__chr10	0.187736	0.536613	2.85833	0.171191
Sdha__chr13	0.252371	0.717529	2.84315	0.223077
Fxyd1__chr7	0.286946	0.815561	2.84221	0.249486
Nexn__chr3	0.230016	0.652113	2.83508	0.205509
Apobec2__chr17	0.113378	0.319938	2.82186	0.107201
Slc2a4__chr11	0.148029	0.417597	2.82105	0.137613
Ndufv3__chr17	0.170797	0.481697	2.82029	0.157029
Uqcr10__chr11	0.182726	0.514333	2.81478	0.167027
Ndufb8__chr19	0.252509	0.710279	2.81289	0.223184
Kcnip2__chr19	0.100956	0.28337	2.80686	0.0960399
Cfl2__chr12	0.163836	0.458123	2.79623	0.151139
Lbh__chr17	0.211643	0.588111	2.7788	0.190774
Atp5j2__chr5	0.269618	0.747306	2.77172	0.236364
2310042D19Rik__chr4	0.12056	0.333015	2.76223	0.113591
Ndufb11__chrX	0.252525	0.694778	2.75132	0.223197
Ndufa11__chr17	0.204877	0.562939	2.74769	0.185279
Hrc__chr7	0.432799	1.18077	2.72821	0.0705547
Acadvl__chr11	0.163572	0.446102	2.72726	0.150915
Gpc1__chr1	0.163804	0.445593	2.72027	0.151113
Acat1__chr9	0.186766	0.505171	2.70483	0.170386
Atp5l__chr9	0.369532	0.998242	2.70137	0.308993
Ogdh__chr11	0.428052	1.15504	2.69836	0.0692258
Etfb__chr7	0.202615	0.545659	2.69308	0.183434
Dgat2__chr7	0.14523	0.390401	2.68816	0.135195
Ivns1abp__chr1	0.204788	0.549946	2.68544	0.185206
Hibadh__chr6	0.135172	0.362214	2.67964	0.126452
Uqcr11__chr10	0.196773	0.526734	2.67686	0.178648
Rab3ip__chr10	0.0888698	0.236443	2.66055	0.0850462
Dsp__chr13	0.210486	0.555073	2.6371	0.189837
Vldlr__chr19	0.143969	0.379097	2.63319	0.134104
Kcnk3__chr5	0.256506	0.675206	2.63232	0.226284
Mdh2__chr5	0.337704	0.887284	2.6274	0.286639
Chchd2__chr5	0.738708	1.93876	2.62452	0.16938
Suclg1__chr6	0.18028	0.473125	2.62439	0.164987
2010107E04Rik__chr12	0.269204	0.704641	2.61749	0.236049
Obscn__chr11	0.233355	0.607996	2.60546	0.208158
Chpt1__chr10	0.124578	0.324137	2.60189	0.117146
Lrtm1__chr14	0.130017	0.338078	2.60026	0.121936
Ndufa3__chr7	0.240161	0.624024	2.59836	0.21353
Gapdh__chr6	0.589442	1.52975	2.59526	0.118441
Efnb3__chr11	0.102237	0.265255	2.59452	0.0971969
Tmem38a__chr8	0.233935	0.606685	2.5934	0.208617
Txlnb__chr10	0.129466	0.33542	2.59079	0.121452
Prkaca__chr8	0.139184	0.360187	2.58785	0.12995
Pink1__chr4	0.186207	0.481197	2.58421	0.169922
Dlst__chr12	0.173102	0.447201	2.58345	0.158971
Cmya5__chr13	0.175821	0.45281	2.5754	0.161255
Egln1__chr8	0.187632	0.483045	2.57443	0.171105
Ndufs6__chr13	0.197553	0.508041	2.57167	0.179289
Camta1__chr4	0.123158	0.316275	2.56803	0.115892
Ndufb2__chr6	0.163672	0.419798	2.56488	0.151
Pcp4l1__chr1	0.12318	0.31594	2.56485	0.115911
Cox17__chr16	0.200817	0.514247	2.56077	0.181964
Hadha__chr5	0.222537	0.568695	2.55551	0.199544
Srl__chr16	0.241264	0.613081	2.54112	0.214398
Ndufa6__chr15	0.20375	0.516393	2.53444	0.18436
Got2__chr8	0.24634	0.623959	2.53292	0.218376
Ryr2__chr13	0.319747	0.808654	2.52905	0.27371
Kcnj11__chr7	0.0961932	0.24316	2.52783	0.0917233
Trim72__chr7	0.125531	0.317102	2.52608	0.117987
Vdac1__chr11	0.247408	0.624162	2.52281	0.219211
Atp1a2__chr1	0.437423	1.10309	2.52179	0.0718567
Slc25a11__chr11	0.183796	0.462413	2.51591	0.167918
Ndufb3__chr1	0.186279	0.468428	2.51465	0.169982
Ndufa8__chr2	0.201692	0.506837	2.51292	0.18268
Psme4__chr11	0.170128	0.426771	2.50852	0.156465
Isca1__chr13	0.143032	0.358292	2.50499	0.133291
Mfn1__chr3	0.123061	0.305858	2.48542	0.115806
Ndufb4__chr16	0.179102	0.444503	2.48185	0.164002
Atp5e__chr2	0.31241	0.771487	2.46947	0.268361
Klhl31__chr9	0.106643	0.263002	2.46618	0.101167
Fam174b__chr7	0.129572	0.319402	2.46506	0.121545
Etfdh__chr3	0.129698	0.319431	2.46288	0.121656
Sdhc__chr1	0.178806	0.439786	2.45957	0.163755
Sh3bgr__chr16	0.102502	0.251357	2.45221	0.0974366
Fem1a__chr17	0.114083	0.279583	2.45071	0.10783
D10Jhu81e__chr10	0.109549	0.26814	2.44768	0.103775
Ndufs1__chr1	0.209829	0.510722	2.434	0.189304
Ephx2__chr14	0.116004	0.282221	2.43286	0.109543
Tuba8__chr6	0.0948678	0.230329	2.4279	0.0905185
Echs1__chr7	0.130503	0.316761	2.42723	0.122362
Fkbp4__chr6	0.218379	0.528789	2.42142	0.196208
Slc4a3__chr1	0.135443	0.327434	2.41751	0.126688
Ndufs3__chr2	0.224523	0.541846	2.41332	0.201132
Hadh__chr3	0.174379	0.420641	2.41222	0.160044
Fh1__chr1	0.13475	0.325045	2.41221	0.126082
Sorbs2__chr8	0.12545	0.302559	2.41179	0.117916
Atp1a1__chr3	0.283972	0.683795	2.40797	0.24725
Grb14__chr2	0.110437	0.264479	2.39483	0.104571
Cisd1__chr10	0.175407	0.418097	2.38358	0.160907
Fitm1__chr14	0.123691	0.294578	2.38156	0.116363
Slc25a12__chr2	0.1344	0.320009	2.38101	0.125777
Decr1__chr4	0.149847	0.356217	2.37721	0.139179
Phb__chr11	0.183696	0.43532	2.36978	0.167835
Cd209c__chr8	0.114311	0.270319	2.36476	0.108034
Fgf1__chr18	0.103922	0.2453	2.36043	0.0987172
Idh3g__chrX	0.180646	0.425871	2.35749	0.165292
Pdhx__chr2	0.0976035	0.230001	2.35648	0.0930036
Clasp1__chr1	0.151809	0.357216	2.35306	0.140867
Mrpl12__chr11	0.14757	0.346985	2.35132	0.137217
Bsg__chr10	0.774149	1.81601	2.34581	0.181964
Doc2g__chr19	0.108016	0.253244	2.3445	0.1024
Gpx4__chr10	0.375521	0.880134	2.34377	0.31312
Sdhd__chr9	0.147105	0.344666	2.343	0.136815
Ndufb6__chr4	0.201113	0.471191	2.34292	0.182206
Ndufa13__chr8	0.260724	0.610008	2.33967	0.229541
Dnaja4__chr9	0.0861928	0.20107	2.3328	0.0825932
Mrpl18__chr17	0.15078	0.350111	2.322	0.139982
Cox7a2__chr9	0.201655	0.465893	2.31035	0.182649
Crat__chr2	0.151111	0.348998	2.30954	0.140267
Immt__chr6	0.163893	0.376135	2.29501	0.151188
Lrrc10__chr10	0.107649	0.246704	2.29173	0.102071
Tecr__chr8	0.43462	0.995526	2.29057	0.352549
Scn5a__chr9	0.125473	0.28678	2.2856	0.117936
Cox7a2l__chr17	0.218007	0.497387	2.28152	0.195909
Mylk3__chr8	0.116161	0.264775	2.27939	0.109682
Tns1__chr1	0.296482	0.674616	2.27541	0.25661
Stard7__chr2	0.12805	0.290623	2.2696	0.120207
Pdk4__chr6	0.141983	0.322015	2.26798	0.132382
Bod1__chr11	0.108153	0.245206	2.26721	0.102523
Mtfp1__chr11	0.10761	0.243854	2.26608	0.102036
Sgca__chr11	0.13792	0.312429	2.26529	0.128849
Ndufc2__chr7	0.250371	0.566325	2.26194	0.221521
Trabd2b__chr4	0.132813	0.300294	2.26103	0.124388
Acox1__chr11	0.122377	0.276344	2.25813	0.115201
Ghitm__chr14	0.20577	0.463988	2.25488	0.186007
Art3__chr5	0.130109	0.292422	2.24751	0.122017
Myo18b__chr5	0.119186	0.267391	2.24347	0.112372
Xirp1__chr9	0.0946584	0.212036	2.24002	0.090328
Rbm24__chr13	0.0970596	0.216632	2.23195	0.09251
Ndufa2__chr18	0.231217	0.514704	2.22606	0.206463
Slc30a9__chr5	0.118505	0.263192	2.22094	0.111767
Smyd1__chr6	0.11911	0.264473	2.22041	0.112305
Tcea3__chr4	0.0986871	0.21901	2.21924	0.093986
Nppb__chr4	0.126603	0.279656	2.20893	0.118932
Timm17a__chr1	0.129602	0.285097	2.19979	0.121571
Mtus2__chr5	0.106295	0.233689	2.1985	0.100854
Polr2m__chr9	0.183817	0.403652	2.19595	0.167936
Unc45b__chr11	0.126557	0.277073	2.18931	0.118892
Hint2__chr4	0.104452	0.227484	2.17788	0.0991949
Nfe2l1__chr11	0.186626	0.405095	2.17063	0.17027
Apoo__chrX	0.0980436	0.212815	2.17061	0.0934027
Atp5g2__chr15	0.320359	0.694381	2.16751	0.274155
Acads__chr5	0.100148	0.217037	2.16716	0.0953088
Lamb2__chr9	0.200038	0.433249	2.16584	0.181326
Itgb1bp2__chrX	0.108916	0.235523	2.16242	0.103208
Art1__chr7	0.124607	0.26945	2.1624	0.117172
Fitm2__chr2	0.0859888	0.185258	2.15445	0.082406
Bckdha__chr7	0.109946	0.236832	2.15407	0.104131
Sspn__chr6	0.167903	0.361415	2.15252	0.154586
Ano10__chr9	0.0923283	0.198654	2.1516	0.0882056
Pebp1__chr5	0.248658	0.534813	2.1508	0.220186
Zfp106__chr2	0.247383	0.531984	2.15045	0.219191
Tsc22d1__chr14	0.18566	0.397912	2.14322	0.169468
Paip2__chr18	0.148075	0.3171	2.14148	0.137653
Lmod2__chr6	0.109636	0.234341	2.13745	0.103853
Ankrd23__chr1	0.0980002	0.209197	2.13466	0.0933634
Sdr39u1__chr14	0.106442	0.22707	2.13328	0.100986
Nmrk2__chr10	0.0866033	0.184696	2.13267	0.0829698
Mrpl51__chr6	0.156732	0.334139	2.13192	0.145087
Ank__chr15	0.123151	0.262517	2.13167	0.115885
Vdac3__chr8	0.207279	0.441308	2.12906	0.187234
Perp__chr10	0.0959897	0.204268	2.12802	0.0915384
Homer2__chr7	0.10215	0.217111	2.12542	0.0971181
Calcoco1__chr15	0.0997951	0.211779	2.12213	0.0949895
Clip4__chr17	0.105567	0.223648	2.11854	0.100199
Pnkd__chr1	0.115279	0.244198	2.11832	0.108897
Myl1__chr1	0.0827885	0.174883	2.11241	0.0794643
Ehd4__chr2	0.2358	0.497855	2.11134	0.210093
2310061I04Rik__chr17	0.120639	0.254646	2.11081	0.113661
Fsd2__chr7	0.0947515	0.199337	2.10379	0.0904126
Pkp4__chr2	0.115737	0.24348	2.10373	0.109305
Chchd7__chr4	0.0976819	0.205036	2.09901	0.0930747
Dnaja3__chr16	0.121766	0.255017	2.09432	0.11466
Dld__chr12	0.12858	0.269083	2.09272	0.120673
Ndufb7__chr8	0.196991	0.412134	2.09215	0.178827
Pacsin3__chr2	0.0990504	0.207062	2.09047	0.0943152
Pnpla2__chr7	0.164619	0.343862	2.08883	0.151805
Scp2__chr4	0.187222	0.391003	2.08845	0.170764
Lyrm5__chr6	0.0903871	0.188574	2.08629	0.0864336
Aldoa__chr7	0.968762	2.02045	2.0856	0.0746254
Lynx1__chr15	0.104581	0.217935	2.08388	0.0993112
Immp1l__chr2	0.0970191	0.202068	2.08276	0.0924733
Gmpr__chr13	0.105762	0.220226	2.08228	0.100374
Ndufa9__chr6	0.162688	0.33747	2.07434	0.150164
Tango2__chr16	0.111361	0.230959	2.07397	0.105398
Clic5__chr17	0.139051	0.287832	2.06998	0.129834
Cacna2d1__chr5	0.147883	0.305612	2.06658	0.137487
Cox7c__chr13	0.110879	0.229089	2.06612	0.104966
Tesc__chr5	0.0918214	0.189482	2.06359	0.0877432
Trim54__chr5	0.103286	0.212968	2.06192	0.0981441
Ttn__chr2	3.2398	6.68017	2.06191	0.046976
Smim20__chr5	0.126459	0.260676	2.06136	0.118805
Kif1c__chr11	0.199951	0.411997	2.06049	0.181255
Asb2__chr12	0.110503	0.227543	2.05916	0.10463
Acyp2__chr11	0.0840776	0.172551	2.05228	0.0806504
Plin5__chr17	0.098303	0.201535	2.05014	0.0936378
Msrb3__chr10	0.124902	0.255794	2.04795	0.117432
Emc6__chr11	0.131949	0.270119	2.04715	0.123631
Vdac2__chr14	0.334285	0.68234	2.04119	0.284196
Tnni3k__chr3	0.0928111	0.189136	2.03786	0.0886458
Tmem66__chr8	0.235494	0.479874	2.03773	0.209851
Bri3__chr5	0.229628	0.467809	2.03725	0.205201
Coq5__chr5	0.0999467	0.203396	2.03504	0.0951266
Sgcg__chr14	0.133032	0.270715	2.03497	0.124579
Ndufs4__chr13	0.144604	0.293634	2.03061	0.134653
Rangrf__chr11	0.0898725	0.182418	2.02974	0.0859633
Gnpat__chr8	0.130031	0.263643	2.02755	0.121948
Mpi__chr9	0.0897888	0.18204	2.02743	0.0858868
Slc25a20__chr9	0.105051	0.212836	2.02603	0.0997341
B230120H23Rik__chr2	0.148307	0.299945	2.02247	0.137852
Acacb__chr5	0.099309	0.200693	2.02089	0.0945493
Mlip__chr9	0.0844434	0.170591	2.02019	0.0809866
Ppp2r3a__chr9	0.127185	0.256603	2.01756	0.119445
Ppp1r3c__chr19	0.101143	0.204055	2.0175	0.0962083
Clu__chr14	0.357298	0.720814	2.0174	0.300485
Corin__chr5	0.105837	0.212733	2.01001	0.100442
Ptp4a3__chr15	0.223674	0.449453	2.00942	0.200453
Csde1__chr3	0.389934	0.783437	2.00915	0.322952
Ube2b__chr11	0.220882	0.442619	2.00387	0.198218
Agl__chr3	0.129914	0.259076	1.99421	0.121846
Hcfc1r1__chr17	0.147663	0.294075	1.99153	0.137297
Tmem201__chr4	0.11319	0.225221	1.98976	0.107033
Usp13__chr3	0.110318	0.219291	1.98781	0.104464
Gyg__chr3	0.124865	0.248054	1.98657	0.1174
Ppm1b__chr17	0.117953	0.234003	1.98387	0.111277
Atp1b1__chr1	0.156012	0.309276	1.98238	0.144471
Ndufa7__chr17	0.176081	0.34895	1.98176	0.161473
Pkia__chr3	0.107038	0.211902	1.97969	0.101522
Lmod3__chr6	0.0863614	0.170863	1.97847	0.0827479
Mcee__chr7	0.0995954	0.197021	1.97821	0.0948087
Pgm2__chr4	0.130019	0.257016	1.97677	0.121937
Acsl1__chr8	0.14286	0.282148	1.975	0.133142
Ankrd40__chr11	0.148334	0.29277	1.97372	0.137876
Ptgr2__chr12	0.1204	0.237602	1.97345	0.113449
Msi2__chr11	0.12196	0.240507	1.97202	0.114831
Cox10__chr11	0.106182	0.209036	1.96866	0.100752
Ifngr2__chr16	0.253212	0.498212	1.96757	0.22373
BC004004__chr17	0.177477	0.345305	1.94563	0.162643
Alas1__chr9	0.114658	0.222929	1.94429	0.108343
Pxmp2__chr5	0.105245	0.203784	1.93628	0.0999093
Limch1__chr5	0.129999	0.251409	1.93392	0.12192
Cd99l2__chrX	0.10834	0.209428	1.93306	0.102691
Lpin1__chr12	0.113985	0.220316	1.93285	0.107743
Tmem65__chr15	0.144117	0.278282	1.93094	0.134232
Me1__chr9	0.103137	0.199092	1.93036	0.0980095
Nudt4__chr10	0.206275	0.397352	1.92632	0.186418
Sord__chr2	0.123721	0.238107	1.92454	0.116389
Nnt__chr13	0.139386	0.268232	1.92439	0.130125
Wipi1__chr11	0.103062	0.198	1.92118	0.0979416
Agtpbp1__chr13	0.113762	0.21854	1.92102	0.107544
Tufm__chr7	0.125491	0.240915	1.91978	0.117952
Slc41a3__chr6	0.1352	0.259535	1.91964	0.126476
Entpd5__chr12	0.100595	0.191845	1.90711	0.0957131
Kcnh2__chr5	0.0846821	0.161475	1.90684	0.081206
Tsc22d4__chr5	0.155614	0.29671	1.90671	0.14413
Mlycd__chr8	0.0952158	0.180934	1.90025	0.090835
Bzw2__chr12	0.116249	0.220371	1.89569	0.109761
Coq7__chr7	0.112281	0.212523	1.89277	0.106221
Pde4a__chr9	0.101711	0.192007	1.88776	0.0967224
Mrps23__chr11	0.121194	0.228713	1.88716	0.114153
Slc25a13__chr6	0.0975926	0.18369	1.88221	0.0929937
Fuca2__chr10	0.149325	0.280614	1.87922	0.13873
Prdx2__chr8	0.19013	0.357241	1.87893	0.173173
Gnas__chr2	1.20353	2.25806	1.8762	0.121261
Sh3glb1__chr3	0.261583	0.490462	1.87498	0.230203
Pla2g12a__chr3	0.100097	0.187552	1.87369	0.095263
Pla2g16__chr19	0.10995	0.205928	1.87293	0.104134
Cd300lg__chr11	0.175552	0.328577	1.87167	0.161029
Mrpl45__chr11	0.112923	0.211169	1.87002	0.106795
Fbxl22__chr9	0.0941108	0.175942	1.86952	0.0898297
Bola3__chr6	0.12517	0.233753	1.86748	0.117669
Mrpl30__chr1	0.137214	0.255889	1.86489	0.128234
Pitpnc1__chr11	0.139883	0.260597	1.86296	0.130558
Ybx1__chr4	0.716898	1.33	1.85522	0.161712
Hspa9__chr18	0.196174	0.363767	1.85431	0.178156
Cpt2__chr4	0.106044	0.196619	1.85412	0.100628
Kcnj5__chr9	0.081208	0.150511	1.8534	0.078008
Pm20d2__chr4	0.0974535	0.180476	1.85192	0.0928674
Xirp2__chr2	0.364453	0.674071	1.84954	0.305473
Ablim1__chr19	0.158679	0.292054	1.84053	0.14675
Adhfe1__chr1	0.0823556	0.150807	1.83116	0.0790656
Sod1__chr16	0.3011	0.551236	1.83074	0.260036
Stk39__chr2	0.121674	0.222458	1.82832	0.114578
Mylk4__chr13	0.0944011	0.172235	1.8245	0.0900939
Aldh4a1__chr4	0.0919668	0.167569	1.82206	0.0878758
Arhgef12__chr9	0.144264	0.262556	1.81997	0.134359
Letm1__chr5	0.106312	0.193242	1.81769	0.100869
Lmo7__chr14	0.12303	0.223494	1.81658	0.115778
Ndufa1__chrX	0.297578	0.538578	1.80987	0.257425
Rab1b__chr19	0.165975	0.299974	1.80735	0.152954
Timm23__chr14	0.179111	0.323262	1.80481	0.16401
Hsd17b10__chrX	0.123862	0.223221	1.80218	0.116514
Mff__chr1	0.144128	0.259719	1.80201	0.134241
Oaz2__chr9	0.143235	0.258005	1.80127	0.133468
Cdc34__chr10	0.172094	0.30976	1.79995	0.158122
Cd36__chr5	0.69295	1.24705	1.79962	0.153369
Grsf1__chr5	0.114552	0.205704	1.79572	0.108249
Rbpms__chr8	0.147831	0.265374	1.79512	0.137442
Cdh2__chr18	0.161143	0.289144	1.79433	0.14885
Dnaja2__chr8	0.175354	0.314445	1.7932	0.160863
Spop__chr11	0.192236	0.344453	1.79182	0.174913
Ccser2__chr14	0.200398	0.358884	1.79086	0.181621
Inpp5a__chr7	0.111744	0.199958	1.78943	0.10574
Cav3__chr6	0.0916468	0.163909	1.78849	0.0875838
Rras2__chr7	0.110366	0.197241	1.78715	0.104508
Sdpr__chr1	0.268068	0.478246	1.78405	0.23518
Samm50__chr15	0.159244	0.283283	1.77893	0.147232
Cul3__chr1	0.130928	0.232794	1.77802	0.122736
Hibch__chr1	0.0918273	0.163113	1.7763	0.0877485
Rab28__chr5	0.0979365	0.173896	1.7756	0.0933056
Prdx3__chr19	0.147433	0.261764	1.77547	0.137099
Fam210a__chr18	0.108811	0.192582	1.76987	0.103114
Rilpl1__chr5	0.110394	0.195199	1.7682	0.104533
Dag1__chr9	0.172127	0.303459	1.763	0.158149
Bckdhb__chr9	0.0876117	0.154407	1.7624	0.0838941
Ehbp1__chr11	0.0936071	0.164903	1.76165	0.089371
Rfk__chr19	0.119073	0.209597	1.76025	0.112272
Mnf1__chr17	0.15572	0.273962	1.75932	0.144221
Dhrs7c__chr11	0.096718	0.170096	1.75867	0.0921999
Mgst3__chr1	0.10686	0.187914	1.7585	0.101362
Cd59a__chr2	0.160055	0.281363	1.75792	0.147923
Pla2g5__chr4	0.0778176	0.13653	1.75449	0.0748763
Mcur1__chr13	0.112529	0.197094	1.75149	0.106443
Nkx2-5__chr17	0.0888471	0.155479	1.74996	0.0850254
Bnip3__chr7	0.156486	0.273671	1.74885	0.144877
Pigp__chr16	0.125103	0.218473	1.74634	0.11761
Cish__chr9	0.0829229	0.144639	1.74426	0.079588
Rxrg__chr1	0.0840366	0.14651	1.74341	0.0806126
Poldip2__chr11	0.108565	0.189185	1.74259	0.102893
Mypn__chr10	0.0929004	0.161823	1.7419	0.0887271
Commd1__chr11	0.121418	0.211427	1.74131	0.114352
Gnao1__chr8	0.0886949	0.154394	1.74073	0.0848861
Bcam__chr7	0.187993	0.326965	1.73924	0.171404
Speg__chr1	0.146171	0.254066	1.73814	0.136009
Fundc2__chrX	0.144213	0.250663	1.73814	0.134315
Fbp2__chr13	0.0802672	0.139493	1.73785	0.0771401
Apbb1__chr7	0.0999594	0.173588	1.73658	0.0951382
Tmem126a__chr7	0.108852	0.188992	1.73622	0.103151
Mapt__chr11	0.107784	0.186797	1.73307	0.102192
Prkag1__chr15	0.110972	0.192231	1.73225	0.10505
Myot__chr18	0.0775783	0.134003	1.72733	0.0746548
Txn2__chr15	0.196002	0.338378	1.7264	0.178015
Rragd__chr4	0.0831579	0.143522	1.7259	0.0798043
Fam195a__chr17	0.0947959	0.163594	1.72575	0.0904531
Ak3__chr19	0.11883	0.204893	1.72425	0.112056
Asb11__chrX	0.0957774	0.165077	1.72355	0.0913455
Lmcd1__chr6	0.0848329	0.146182	1.72317	0.0813446
Mtus1__chr8	0.129061	0.222373	1.723	0.121096
Slc25a42__chr8	0.0819603	0.141193	1.7227	0.0787014
Ppara__chr15	0.090726	0.156269	1.72243	0.0867432
Fhl1__chrX	0.128882	0.221932	1.72198	0.120938
Ndufaf1__chr2	0.0895285	0.154058	1.72077	0.0856487
Dcaf11__chr14	0.104759	0.180147	1.71962	0.0994718
Strip2__chr6	0.0838802	0.144039	1.71719	0.0804688
Rnf14__chr18	0.110351	0.189447	1.71677	0.104494
Pik3ip1__chr11	0.0896245	0.153684	1.71475	0.0857365
Rrad__chr8	0.096141	0.164792	1.71407	0.0916758
1110001J03Rik__chr6	0.10164	0.173702	1.709	0.0966577
Cisd3__chr11	0.0963913	0.164376	1.7053	0.0919032
Adipor1__chr1	0.19439	0.331371	1.70467	0.176689
Lrrc39__chr3	0.0857178	0.146053	1.70389	0.0821572
Pdf__chr8	0.117854	0.2008	1.70381	0.111189
Slc8a1__chr17	0.164691	0.280394	1.70254	0.151866
Nfib__chr4	0.273939	0.465897	1.70073	0.239658
Prpf19__chr19	0.12344	0.209825	1.69981	0.116141
Ktn1__chr14	0.161753	0.274631	1.69785	0.149369
Gsto1__chr19	0.118158	0.200297	1.69516	0.111459
Smim11__chr16	0.0998867	0.169218	1.69409	0.0950724
Slco3a1__chr7	0.122126	0.206793	1.69328	0.114978
C130080G10Rik__chr2	0.100355	0.169844	1.69243	0.0954961
Snta1__chr2	0.0874437	0.14794	1.69183	0.0837402
Zcrb1__chr15	0.154691	0.261207	1.68858	0.143339
St3gal5__chr6	0.136542	0.230554	1.68852	0.127648
Larp1b__chr3	0.0979982	0.165458	1.68837	0.0933616
Eif1__chr11	0.886789	1.4972	1.68834	0.222716
Fahd1__chr17	0.0853491	0.14404	1.68765	0.0818187
Asb10__chr5	0.0839967	0.14174	1.68744	0.080576
Map1lc3b__chr8	0.22429	0.378432	1.68724	0.200946
Gm561__chr2	0.0875618	0.147673	1.68649	0.0838485
Fabp4__chr3	0.746894	1.25843	1.68488	0.172274
Rwdd1__chr10	0.128683	0.216765	1.68448	0.120764
Rnf10__chr5	0.16058	0.270248	1.68294	0.148371
Slc35f5__chr1	0.104414	0.175578	1.68156	0.0991606
Epas1__chr17	0.249362	0.41904	1.68045	0.220735
Mrpl13__chr15	0.109991	0.184723	1.67943	0.104172
E2f6__chr12	0.101522	0.170408	1.67853	0.0965515
Pccb__chr9	0.105665	0.177226	1.67724	0.100287
Tfb2m__chr1	0.0960678	0.161067	1.67659	0.0916094
Ppp1r14c__chr10	0.0815106	0.136614	1.67603	0.078287
Pin1__chr9	0.11245	0.188374	1.67517	0.106372
Kctd9__chr14	0.0939298	0.157236	1.67397	0.0896649
Kcng2__chr18	0.11307	0.189122	1.6726	0.106926
Ugp2__chr11	0.169915	0.284109	1.67206	0.156285
2210407C18Rik__chr11	0.0775107	0.129565	1.67157	0.0745922
Dnajb2__chr1	0.0905558	0.151275	1.67052	0.0865877
2310002L09Rik__chr4	0.0785004	0.131033	1.6692	0.0755079
Bag1__chr4	0.172737	0.288259	1.66878	0.158663
Svil__chr18	0.168305	0.280487	1.66654	0.154925
Auh__chr13	0.0930767	0.155097	1.66634	0.0888878
Coa3__chr11	0.114322	0.190489	1.66626	0.108043
Glo1__chr17	0.110179	0.183524	1.66569	0.10434
Dnajb12__chr10	0.0858683	0.143014	1.66551	0.0822954
Ptpn11__chr5	0.159909	0.266194	1.66465	0.147799
Prkar1a__chr11	0.395245	0.657639	1.66388	0.326539
March2__chr17	0.130452	0.2168	1.66191	0.122318
Itga7__chr10	0.121897	0.202571	1.66182	0.114775
Myl12a__chr17	0.490861	0.815171	1.6607	0.387968
Rbpms2__chr9	0.0891196	0.147958	1.66022	0.0852747
Gja1__chr10	0.192305	0.319261	1.66018	0.17497
Myadml2__chr11	0.0922919	0.153191	1.65985	0.0881724
Fhod3__chr18	0.118965	0.197434	1.6596	0.112176
Adamtsl5__chr10	0.0940598	0.156078	1.65934	0.0897832
March5__chr19	0.12477	0.207017	1.65919	0.117316
Optn__chr2	0.0896782	0.148713	1.6583	0.0857856
Mrpl2__chr17	0.100123	0.165974	1.6577	0.095286
Lingo3__chr10	0.076892	0.127399	1.65686	0.0740195
Cpe__chr8	0.180551	0.299078	1.65647	0.165214
Rbm38__chr2	0.0948569	0.157	1.65513	0.0905086
Comt__chr16	0.182909	0.302733	1.6551	0.16718
Higd2a__chr13	0.145407	0.240591	1.6546	0.135348
Fyco1__chr9	0.143974	0.238173	1.65428	0.134108
AI314180__chr4	0.132584	0.219048	1.65215	0.124187
Oaz1__chr10	0.147639	0.24389	1.65194	0.137276
Tpi1__chr6	0.429694	0.709195	1.65047	0.34935
Ict1__chr11	0.100629	0.166029	1.64991	0.0957439
Mrps36__chr13	0.122326	0.201778	1.64951	0.115156
Golga4__chr9	0.209152	0.344927	1.64917	0.188756
Cltb__chr13	0.132232	0.218062	1.64909	0.123879
Mmadhc__chr2	0.117568	0.193859	1.64891	0.110934
Gstm2__chr3	0.147384	0.242912	1.64816	0.137056
Slc25a23__chr17	0.0869399	0.14324	1.64757	0.0832784
Ctnna1__chr18	0.236306	0.389208	1.64705	0.210492
Emc2__chr15	0.112561	0.185372	1.64686	0.106471
Mrpl4__chr9	0.108019	0.17783	1.64629	0.102403
Pyurf__chr6	0.0944288	0.155426	1.64596	0.0901191
Slc38a3__chr9	0.0925467	0.15227	1.64533	0.0884047
Abcc9__chr6	0.131464	0.21609	1.64372	0.123206
Pcnx__chr12	0.108495	0.178096	1.64152	0.10283
Pkig__chr2	0.123374	0.202207	1.63897	0.116082
Nap1l4__chr7	0.12454	0.204075	1.63863	0.117113
Tbrg4__chr11	0.10454	0.171228	1.63792	0.0992741
Ric8b__chr10	0.0927069	0.151841	1.63786	0.0885508
Agap3__chr5	0.103212	0.16889	1.63634	0.0980771
Mtx2__chr2	0.0955805	0.156349	1.63579	0.0911665
Fdx1__chr9	0.0960138	0.157016	1.63535	0.0915603
Akap1__chr11	0.0955893	0.156184	1.6339	0.0911746
Lrrc14b__chr13	0.0855838	0.139786	1.63332	0.0820342
Cbr4__chr8	0.0826998	0.13505	1.63301	0.0793826
Rpp14__chr14	0.095588	0.156029	1.63231	0.0911733
Yars2__chr16	0.0832701	0.135859	1.63155	0.0799075
Tecrl__chr5	0.083378	0.136004	1.63118	0.0800068
D830015G02Rik__chr14	0.196487	0.320419	1.63073	0.178414
3425401B19Rik__chr14	0.085848	0.139829	1.6288	0.0822768
Phpt1__chr2	0.0932097	0.151819	1.62879	0.089009
Pkp2__chr16	0.101431	0.165095	1.62766	0.096469
Iscu__chr5	0.13572	0.220633	1.62564	0.12693
Gata4__chr14	0.107613	0.174757	1.62394	0.102038
Pdrg1__chr2	0.11639	0.188849	1.62256	0.109886
Myl4__chr11	0.0765437	0.124168	1.62219	0.0736969
Myl7__chr11	0.07557	0.122561	1.62182	0.0727943
Higd1a__chr9	0.150853	0.244476	1.62063	0.140045
Sh3kbp1__chrX	0.158742	0.256917	1.61846	0.146803
Hint3__chr10	0.0870558	0.140709	1.61631	0.0833847
2410127L17Rik__chr19	0.102871	0.16625	1.6161	0.0977691
Reep5__chr18	0.310367	0.501453	1.61568	0.266864
Slain2__chr5	0.126406	0.203785	1.61215	0.118759
Ppp1r2__chr16	0.182757	0.294568	1.6118	0.167053
Gsta4__chr9	0.0908581	0.146254	1.60969	0.0868639
Mgrn1__chr16	0.131821	0.212082	1.60886	0.123519
Serpinb6b__chr13	0.0902628	0.145184	1.60846	0.08632
Tprgl__chr4	0.145711	0.234091	1.60654	0.135611
Gm10336__chr13	0.0982238	0.157792	1.60646	0.093566
Pip5k1b__chr19	0.079868	0.128269	1.60602	0.0767715
Prdx5__chr19	0.311713	0.500288	1.60497	0.26785
Pdxdc1__chr16	0.134641	0.216083	1.60489	0.125987
Mrpl50__chr4	0.094663	0.151889	1.60452	0.0903321
Mrpl14__chr17	0.118077	0.189278	1.603	0.111387
Prdx6__chr1	0.201605	0.323134	1.60281	0.182608
Fam134b__chr15	0.161739	0.259187	1.6025	0.149358
Rgs5__chr1	0.0990074	0.158632	1.60222	0.0942762
Stradb__chr1	0.087928	0.140667	1.5998	0.0841839
Bri3bp__chr5	0.119725	0.191501	1.5995	0.112851
Asnsd1__chr1	0.110389	0.176481	1.59872	0.104528
Dirc2__chr16	0.0992657	0.158697	1.59871	0.0945101
Qk__chr17	0.305988	0.489114	1.59847	0.263646
Aldh6a1__chr12	0.0914949	0.146234	1.59827	0.0874452
Hsdl2__chr4	0.103436	0.165283	1.59792	0.0982792
Coq2__chr5	0.0969191	0.154841	1.59763	0.0923824
Ank3__chr10	0.0915182	0.146099	1.59639	0.0874665
Adk__chr14	0.105985	0.168998	1.59454	0.100575
Rassf3__chr10	0.144938	0.230966	1.59355	0.134942
Slc20a2__chr8	0.112171	0.17865	1.59267	0.106122
Gys1__chr7	0.106603	0.169596	1.59092	0.10113
Tmem223__chr19	0.100675	0.160113	1.59039	0.095786
Tmem159__chr7	0.0899994	0.143069	1.58966	0.0860793
Rcan1__chr16	0.108209	0.172008	1.58959	0.102574
Lonp1__chr17	0.117917	0.187354	1.58886	0.111245
Ddo__chr10	0.081076	0.128583	1.58595	0.0778862
Acss1__chr2	0.105706	0.167602	1.58555	0.100324
Timm8b__chr9	0.104639	0.165807	1.58457	0.0993629
Foxred1__chr9	0.0977838	0.154926	1.58437	0.0931671
Nrd1__chr4	0.168037	0.266189	1.58411	0.154699
Fez2__chr17	0.120507	0.190884	1.58401	0.113544
Cisd2__chr3	0.127763	0.20228	1.58325	0.119954
D17Wsu92e__chr17	0.13051	0.206563	1.58273	0.122369
Tmem161a__chr8	0.113049	0.178812	1.58172	0.106907
Eci2__chr13	0.124109	0.196122	1.58025	0.116732
Slmap__chr14	0.116874	0.184592	1.57941	0.110317
Rnf128__chrX	0.141609	0.223557	1.57869	0.132057
Mov10l1__chr15	0.0856231	0.135011	1.57681	0.0820703
Klhdc2__chr12	0.113138	0.178321	1.57613	0.106987
Aip__chr19	0.119045	0.187448	1.5746	0.112247
Gabarapl1__chr6	0.12778	0.201163	1.57429	0.119969
Rab3a__chr8	0.0846187	0.133123	1.57321	0.0811477
Rab5b__chr10	0.104318	0.16401	1.57222	0.0990738
Sptb__chr12	0.0935249	0.146913	1.57085	0.0892961
Fbxw7__chr3	0.100533	0.157815	1.56978	0.0956573
Dhrs4__chr14	0.106	0.166394	1.56976	0.100588
Dap3__chr3	0.113081	0.177258	1.56753	0.106936
Myo18a__chr11	0.140335	0.219843	1.56656	0.13095
Nek9__chr12	0.122649	0.192128	1.56648	0.115441
Asph__chr4	0.168435	0.263828	1.56635	0.155036
Dnajc21__chr15	0.101509	0.158953	1.5659	0.0965391
Hhatl__chr9	0.128767	0.20127	1.56306	0.120837
Cog7__chr7	0.0912423	0.14253	1.56211	0.0872147
Gpsm1__chr2	0.0915666	0.143017	1.56189	0.0875107
2700089E24Rik__chr6	0.130677	0.204044	1.56144	0.122515
Fkbp3__chr12	0.102602	0.160204	1.56141	0.0975264
R3hdm2__chr10	0.136016	0.212362	1.5613	0.127189
Spr__chr6	0.107572	0.167834	1.5602	0.102002
Aga__chr8	0.0951403	0.148337	1.55913	0.0907663
Cap2__chr13	0.093012	0.144833	1.55714	0.0888289
Denr__chr5	0.121956	0.189838	1.55662	0.114828
Fam69b__chr2	0.0849	0.132115	1.55613	0.0814062
Atpif1__chr4	0.172974	0.268918	1.55467	0.158863
Btbd1__chr7	0.121669	0.189092	1.55416	0.114573
Tmem63b__chr17	0.104909	0.162961	1.55335	0.0996068
Exoc6__chr19	0.0867052	0.134672	1.55322	0.0830632
Smim8__chr4	0.0853504	0.132486	1.55226	0.0818199
Afg3l2__chr18	0.117682	0.182671	1.55223	0.111036
Usp19__chr9	0.126065	0.19566	1.55205	0.118459
Minos1__chr4	0.226711	0.351758	1.55157	0.202879
Rab12__chr17	0.117558	0.182246	1.55027	0.110925
P2ry2__chr7	0.08745	0.13556	1.55014	0.083746
Smarcd3__chr5	0.0861624	0.133564	1.55014	0.0825653
Smpd1__chr7	0.181289	0.280946	1.54972	0.165829
Nudt3__chr17	0.136907	0.212033	1.54874	0.127966
Psmc3__chr2	0.177888	0.275466	1.54854	0.162986
Txndc15__chr13	0.11781	0.182289	1.54731	0.11115
Pptc7__chr5	0.153897	0.237802	1.5452	0.142659
Cyhr1__chr15	0.125224	0.193397	1.54441	0.117716
Tomm40l__chr1	0.0952665	0.146833	1.54128	0.090881
Flad1__chr3	0.0838548	0.129214	1.54093	0.0804454
Ivd__chr2	0.101852	0.156575	1.53728	0.0968491
Atp5sl__chr7	0.087262	0.134091	1.53665	0.0835737
Tcp11l2__chr10	0.0986172	0.151429	1.53552	0.0939226
Sobp__chr10	0.0885196	0.135913	1.5354	0.0847256
Ppp1ca__chr19	0.26189	0.402091	1.53534	0.230439
Cidea__chr18	0.0865557	0.132791	1.53416	0.0829261
Cyfip2__chr11	0.108512	0.166369	1.53318	0.102845
Prob1__chr18	0.0865051	0.13257	1.53252	0.0828797
Ppargc1a__chr5	0.10288	0.157524	1.53114	0.0977775
Cdo1__chr18	0.0758328	0.116092	1.53089	0.073038
Hdac5__chr11	0.11362	0.173819	1.52983	0.107417
Pfdn1__chr18	0.112327	0.171836	1.52979	0.106262
Ghr__chr15	0.109421	0.167315	1.52909	0.103661
Akr1b10__chr6	0.0884328	0.134903	1.52548	0.0846462
Rb1cc1__chr1	0.116286	0.177301	1.52469	0.109794
Smyd2__chr1	0.12384	0.188809	1.52462	0.116494
Mtch2__chr2	0.131196	0.199919	1.52381	0.122971
Nudt7__chr8	0.0882539	0.1344	1.52288	0.0844824
Nol7__chr13	0.121984	0.185757	1.5228	0.114853
Kif1b__chr4	0.151783	0.231056	1.52228	0.140845
Tmtc1__chr6	0.0953957	0.145214	1.52223	0.0909985
Naa20__chr2	0.127337	0.193789	1.52186	0.119579
Hist1h1c__chr13	0.116962	0.177971	1.52161	0.110396
Ablim3__chr18	0.105114	0.159934	1.52153	0.099791
Polr2l__chr7	0.183695	0.279443	1.52124	0.167834
0610012G03Rik__chr16	0.126185	0.191941	1.52111	0.118564
Ube2d3__chr3	0.265297	0.403483	1.52087	0.233057
Frmd5__chr2	0.0816888	0.12421	1.52053	0.0784512
Myh7__chr14	0.0849195	0.128934	1.51831	0.0814241
Nadkd1__chr15	0.0914839	0.138829	1.51752	0.0874352
Herpud1__chr8	0.125351	0.190131	1.51679	0.117828
Asb15__chr6	0.0841509	0.127634	1.51673	0.0807177
Agpat3__chr10	0.131306	0.199093	1.51626	0.123067
Mapkapk2__chr1	0.188188	0.285282	1.51594	0.171566
Ehbp1l1__chr19	0.205976	0.312143	1.51543	0.186174
Rp9__chr9	0.117072	0.177385	1.51517	0.110494
Ube2r2__chr4	0.22721	0.344195	1.51488	0.203276
Psmb7__chr2	0.206573	0.312589	1.51322	0.18666
Cmc2__chr8	0.0895291	0.135422	1.5126	0.0856493
Mettl23__chr11	0.0899531	0.13604	1.51234	0.0860369
2900097C17Rik__chr2	0.225123	0.34036	1.51188	0.201612
Mrpl3__chr9	0.0960648	0.145222	1.51171	0.0916067
Rasl10b__chr11	0.0860903	0.130091	1.51109	0.0824991
Htra1__chr7	0.105778	0.159774	1.51046	0.100389
Dym__chr18	0.0945056	0.142741	1.5104	0.0901889
Zadh2__chr18	0.110443	0.166663	1.50905	0.104576
Mrpl38__chr11	0.0915436	0.137906	1.50645	0.0874897
Spag7__chr11	0.136732	0.205927	1.50607	0.127813
Mrps15__chr4	0.126796	0.190941	1.50589	0.119103
Ubxn2a__chr12	0.097711	0.14708	1.50526	0.0931011
Rab11b__chr17	0.196376	0.295331	1.5039	0.178322
Tead1__chr7	0.15745	0.236705	1.50337	0.1457
Ppp1r3a__chr6	0.0888809	0.1336	1.50313	0.0850563
Cdadc1__chr14	0.094616	0.142142	1.50231	0.0902894
Zfp651__chr9	0.102662	0.154138	1.50141	0.097581
Ndufaf3__chr9	0.0871707	0.130785	1.50034	0.08349
Wfs1__chr5	0.119704	0.179507	1.49959	0.112832
Anapc13__chr9	0.112286	0.168371	1.49949	0.106225
Adra1b__chr11	0.0874391	0.131092	1.49924	0.083736
Slc16a1__chr3	0.123113	0.184538	1.49893	0.115852
Nfix__chr8	0.168196	0.252112	1.49892	0.154833
Cox20__chr1	0.116716	0.174903	1.49853	0.110177
Mpnd__chr17	0.0962804	0.144117	1.49685	0.0918025
Casz1__chr4	0.096958	0.145039	1.4959	0.0924178
Dph3__chr14	0.112139	0.167671	1.49521	0.106094
Asb14__chr14	0.0858453	0.128327	1.49486	0.0822743
Anapc16__chr10	0.130734	0.195285	1.49376	0.122565
Mrpl37__chr4	0.105241	0.157164	1.49337	0.0999055
Snapin__chr3	0.108721	0.162294	1.49276	0.103033
Habp4__chr13	0.0953392	0.142304	1.4926	0.0909471
Bag3__chr7	0.134817	0.201166	1.49214	0.126141
Zfand3__chr17	0.120542	0.179859	1.49208	0.113575
Usp9x__chrX	0.149794	0.223484	1.49195	0.139133
Asrgl1__chr19	0.0789156	0.117716	1.49167	0.0758916
Dctn6__chr8	0.0981933	0.146468	1.49163	0.0935384
Arl2__chr19	0.10095	0.1505	1.49084	0.0960338
Gcdh__chr8	0.0877404	0.130806	1.49083	0.0840121
Ptcd2__chr13	0.0991755	0.147844	1.49074	0.0944284
Dmwd__chr7	0.102175	0.152307	1.49065	0.0971413
Lims2__chr18	0.132151	0.196967	1.49046	0.123808
Magee1__chrX	0.0830236	0.123744	1.49046	0.0796807
Alpk3__chr7	0.0891072	0.132758	1.48987	0.0852634
Srf__chr17	0.125145	0.186389	1.48938	0.117647
Drap1__chr19	0.229409	0.341588	1.48899	0.205027
Oxa1l__chr14	0.107436	0.159957	1.48885	0.10188
Rhot2__chr17	0.0990292	0.147381	1.48826	0.0942959
Npr2__chr4	0.106793	0.158934	1.48825	0.101301
Opa1__chr16	0.106278	0.158119	1.48778	0.100839
Kxd1__chr8	0.105061	0.156293	1.48764	0.0997436
Ube2a__chrX	0.109655	0.1631	1.48739	0.10387
Mrps31__chr8	0.091289	0.135758	1.48712	0.0872573
Dlg1__chr16	0.118247	0.175788	1.48662	0.111538
Nenf__chr1	0.12337	0.183251	1.48538	0.116079
Ces1d__chr8	0.115034	0.170838	1.48511	0.108679
Ube2v1__chr2	0.178196	0.26446	1.4841	0.163245
Mipep__chr14	0.0868933	0.12894	1.48389	0.0832356
Tmem147__chr7	0.171082	0.253386	1.48108	0.157269
Nceh1__chr3	0.194328	0.287807	1.48104	0.176637
Grpel1__chr5	0.132831	0.196709	1.4809	0.124403
Rab11fip5__chr6	0.142095	0.21017	1.47908	0.132479
Fopnl__chr16	0.0951371	0.140597	1.47784	0.0907634
Smim19__chr8	0.10455	0.154337	1.4762	0.0992828
Ormdl1__chr1	0.0874155	0.129027	1.47602	0.0837144
Cwf19l2__chr9	0.0902772	0.133216	1.47563	0.0863331
2810428I15Rik__chr8	0.116621	0.172051	1.47529	0.110093
Ptcd3__chr6	0.114081	0.168281	1.4751	0.107829
Vps25__chr11	0.131326	0.193715	1.47507	0.123084
Sgta__chr10	0.123387	0.181691	1.47253	0.116094
Hspb2__chr9	0.0904031	0.133088	1.47216	0.0864482
March6__chr15	0.132092	0.194431	1.47193	0.123756
4833439L19Rik__chr13	0.113404	0.166811	1.47094	0.107224
Cdip1__chr16	0.0946842	0.139247	1.47065	0.0903514
Scube2__chr7	0.082886	0.121864	1.47026	0.079554
Pecr__chr1	0.08079	0.118768	1.47008	0.0776224
Ciapin1__chr8	0.109103	0.1603	1.46925	0.103376
Brwd1__chr16	0.113022	0.165978	1.46854	0.106883
Prkrir__chr7	0.117846	0.172951	1.4676	0.111182
Pttg1__chr11	0.113747	0.166869	1.46702	0.10753
Yipf7__chr5	0.105867	0.155147	1.4655	0.100468
Cacybp__chr1	0.137267	0.201124	1.4652	0.12828
Irs1__chr1	0.08742	0.128066	1.46496	0.0837185
Hand2__chr8	0.087879	0.128734	1.4649	0.084139
Fermt2__chr14	0.147274	0.215624	1.4641	0.136961
Pcgf5__chr19	0.0919685	0.134461	1.46203	0.0878774
Car14__chr3	0.0836928	0.122343	1.46181	0.0802965
Gstm1__chr3	0.222706	0.325529	1.4617	0.199679
Zfp706__chr15	0.162228	0.237106	1.46156	0.149773
Tanc1__chr2	0.0923679	0.134996	1.46151	0.0882417
Gpr22__chr12	0.0847492	0.123855	1.46143	0.0812677
Mrps27__chr13	0.0957768	0.13992	1.4609	0.0913449
Myo5b__chr18	0.078925	0.115236	1.46007	0.0759003
Bad__chr19	0.0937614	0.13689	1.45998	0.0895115
Fam220a__chr5	0.0988298	0.14425	1.45958	0.0941153
Grlf1__chr7	0.094973	0.138614	1.45951	0.0906142
Gtpbp1__chr15	0.095806	0.139808	1.45928	0.0913715
Ywhae__chr11	0.531673	0.775313	1.45825	0.412452
Dst__chr1	0.253574	0.369393	1.45675	0.224011
Dnajc19__chr3	0.12163	0.177108	1.45611	0.11454
C1qtnf9__chr14	0.105998	0.154298	1.45566	0.100587
Hdlbp__chr1	0.307124	0.446861	1.45499	0.264482
Osbp__chr19	0.110072	0.160143	1.45489	0.104244
Pcyt2__chr11	0.0930358	0.135281	1.45408	0.0888505
Zfp672__chr11	0.0884662	0.128623	1.45392	0.0846767
Gpi1__chr7	0.363446	0.528377	1.4538	0.304773
Hypk__chr2	0.14306	0.207925	1.45341	0.133316
Dynlt3__chrX	0.12888	0.187252	1.45292	0.120937
Zfp945__chr17	0.0858222	0.124591	1.45173	0.0822531
Rheb__chr5	0.148873	0.216099	1.45156	0.13834
Lama5__chr2	0.104789	0.152093	1.45142	0.0994987
Gprasp1__chrX	0.0846019	0.122788	1.45136	0.0811323
Pfn2__chr3	0.0936141	0.13584	1.45106	0.0893774
Rab10__chr12	0.186816	0.271008	1.45067	0.170428
Tmem205__chr9	0.105188	0.152556	1.45032	0.0998574
Gm12070__chr11	0.0852418	0.123624	1.45027	0.0817202
Rbm20__chr19	0.0934724	0.135506	1.44969	0.0892483
Mrpl55__chr11	0.0959771	0.139114	1.44945	0.091527
Trpc4ap__chr2	0.122137	0.176981	1.44904	0.114988
Map2k2__chr10	0.182397	0.264268	1.44886	0.166753
Ppargc1b__chr18	0.0924572	0.133903	1.44827	0.0883231
Cog6__chr3	0.0898648	0.130143	1.4482	0.0859563
Slc12a7__chr13	0.129699	0.187824	1.44815	0.121656
0610009O20Rik__chr18	0.095002	0.137543	1.44779	0.0906405
Insig2__chr1	0.10023	0.14511	1.44777	0.095383
Mta1__chr12	0.116221	0.16826	1.44776	0.109736
Msrb2__chr2	0.0877549	0.126969	1.44686	0.0840254
Ppm1a__chr12	0.12933	0.186878	1.44497	0.121332
Ndufs8__chr19	0.138503	0.200061	1.44445	0.129357
Ubl4__chrX	0.126988	0.183403	1.44426	0.119271
Syt7__chr19	0.0956747	0.138166	1.44412	0.0912522
Paqr9__chr9	0.0821227	0.118585	1.444	0.078851
Apip__chr2	0.094046	0.1358	1.44398	0.0897706
Cat__chr2	0.11386	0.164399	1.44386	0.107632
Stau2__chr1	0.0863519	0.124632	1.44331	0.0827392
Tacc2__chr7	0.113727	0.164107	1.44299	0.107512
Cited4__chr4	0.0830562	0.119818	1.44262	0.0797107
Ptpla__chr2	0.115985	0.167234	1.44185	0.109526
Swi5__chr2	0.167827	0.241901	1.44137	0.154522
Extl1__chr4	0.0802777	0.115693	1.44116	0.0771497
Pnpla8__chr12	0.1066	0.153608	1.44097	0.101128
Zbtb20__chr16	0.13274	0.1912	1.44041	0.124324
Cacfd1__chr2	0.0961676	0.138496	1.44016	0.0917001
Vwa8__chr14	0.101157	0.145644	1.43978	0.0962214
Trappc6b__chr12	0.119633	0.172236	1.4397	0.112769
Angpt1__chr15	0.0831515	0.119663	1.43909	0.0797984
Arpc5l__chr2	0.117731	0.16939	1.43878	0.11108
Irgm2__chr11	0.0867768	0.124852	1.43877	0.0831289
Mterfd1__chr13	0.0901777	0.129735	1.43866	0.0862423
2610001J05Rik__chr6	0.111944	0.161015	1.43835	0.10592
Dusp18__chr11	0.0862498	0.124009	1.43779	0.0826454
Ndufaf4__chr4	0.112645	0.161944	1.43765	0.106547
Hmgb3__chrX	0.1007	0.144729	1.43724	0.0958079
Coa5__chr1	0.146745	0.210893	1.43714	0.136504
Lclat1__chr17	0.103875	0.149273	1.43705	0.0986748
Ip6k3__chr17	0.0769056	0.110509	1.43695	0.074032
Lrpprc__chr17	0.145357	0.208774	1.43629	0.135305
Mrpl47__chr3	0.0903669	0.129757	1.43589	0.0864151
Bcs1l__chr1	0.0821013	0.117855	1.43549	0.0788313
Dnlz__chr2	0.0971296	0.139416	1.43536	0.0925735
Gabarapl2__chr8	0.139388	0.199952	1.43449	0.130127
Mrps18a__chr17	0.0969556	0.13907	1.43437	0.0924157
Ccdc47__chr11	0.143457	0.205602	1.4332	0.13366
Hk1__chr10	0.147714	0.211698	1.43316	0.137341
Cox14__chr15	0.115893	0.166083	1.43307	0.109444
Dnajc28__chr16	0.077061	0.110406	1.43271	0.074176
Smdt1__chr15	0.14009	0.200668	1.43242	0.130738
Mul1__chr4	0.0862772	0.123562	1.43215	0.0826706
Yae1d1__chr13	0.088289	0.126382	1.43146	0.0845145
Rabggtb__chr3	0.114272	0.163547	1.4312	0.107999
Mrps35__chr6	0.101327	0.144995	1.43096	0.0963751
Rnf207__chr4	0.0876174	0.12537	1.43088	0.0838994
Slco5a1__chr1	0.0810096	0.115909	1.43081	0.077825
Murc__chr4	0.0871476	0.124627	1.43007	0.0834688
Cand2__chr6	0.0979217	0.140032	1.43004	0.0932921
1810058I24Rik__chr6	0.14734	0.210649	1.42968	0.137018
Mccc1__chr3	0.0891628	0.127472	1.42966	0.0853143
Glrx3__chr7	0.133899	0.191311	1.42877	0.125338
Pcyt1a__chr16	0.11797	0.168502	1.42834	0.111292
Nudt19__chr7	0.0951364	0.135839	1.42784	0.0907628
Zfp68__chr5	0.0869801	0.124162	1.42748	0.0833152
Trip10__chr17	0.103381	0.147549	1.42724	0.0982296
Kcnb1__chr2	0.0965639	0.137712	1.42613	0.09206
Abcc8__chr7	0.0849964	0.12121	1.42606	0.0814947
Tmem134__chr19	0.120172	0.171372	1.42606	0.113247
Fam189a2__chr19	0.0904524	0.12899	1.42605	0.0864932
Dnajc15__chr14	0.108452	0.154626	1.42576	0.102791
Zfp91__chr19	0.150293	0.214211	1.42529	0.139563
Sbk1__chr7	0.0932	0.132757	1.42444	0.0890001
Fbxw4__chr19	0.0880923	0.125442	1.42399	0.0843344
Hint1__chr11	0.241253	0.343501	1.42382	0.214389
Bves__chr10	0.0855558	0.121809	1.42374	0.0820085
Trap1__chr16	0.0965288	0.137368	1.42308	0.0920281
Hrasls__chr16	0.0782287	0.111304	1.4228	0.0752566
Syngr1__chr15	0.107824	0.153383	1.42253	0.102228
Dsg2__chr18	0.0959076	0.13643	1.42252	0.0914638
Atxn10__chr15	0.140237	0.199396	1.42185	0.130865
Adipor2__chr6	0.122306	0.173873	1.42163	0.115137
L2hgdh__chr12	0.081933	0.116475	1.42159	0.0786762
Cxadr__chr16	0.0834973	0.118632	1.42079	0.0801166
Stx12__chr4	0.119566	0.169837	1.42045	0.112709
Cops3__chr11	0.0907004	0.128826	1.42035	0.0867198
Frmd4a__chr2	0.0970945	0.137886	1.42012	0.0925417
Twf2__chr9	0.121368	0.17235	1.42006	0.114307
Shb__chr4	0.0837463	0.118893	1.41968	0.0803457
Guk1__chr11	0.0961476	0.136474	1.41943	0.0916818
Rbfox2__chr15	0.107102	0.151996	1.41917	0.101579
Eri3__chr4	0.120649	0.171032	1.4176	0.11367
Lace1__chr10	0.0851222	0.1206	1.41679	0.0816104
Tmx2__chr2	0.114262	0.161853	1.41651	0.10799
Mat2b__chr11	0.109512	0.155104	1.41632	0.103742
Mrpl34__chr8	0.123229	0.17453	1.41631	0.115954
Hist1h2bc__chr13	0.114674	0.162373	1.41595	0.108358
Amacr__chr15	0.080364	0.113737	1.41528	0.0772294
G6pc3__chr11	0.0989155	0.139925	1.41459	0.094193
Mrpl28__chr17	0.107734	0.152381	1.41441	0.102147
Pcyox1__chr6	0.128531	0.181689	1.41358	0.12063
Car8__chr4	0.107122	0.151407	1.41341	0.101597
Gltscr2__chr7	0.155085	0.219114	1.41286	0.143678
Mut__chr17	0.105184	0.148593	1.41269	0.0998543
Rab18__chr18	0.128483	0.18148	1.41248	0.120588
Esrra__chr19	0.102009	0.144063	1.41226	0.0969909
Tcf15__chr2	0.107588	0.151882	1.41171	0.102016
Thrsp__chr7	0.0876632	0.123698	1.41106	0.0839413
Slc25a29__chr12	0.0766307	0.108119	1.41091	0.0737774
Tmem242__chr17	0.116062	0.163652	1.41004	0.109594
Ppp1r16b__chr2	0.0888857	0.125261	1.40924	0.0850607
Lrrc57__chr2	0.0924986	0.130319	1.40888	0.0883608
Pmpcb__chr5	0.124231	0.175015	1.40879	0.116839
2610507B11Rik__chr11	0.202917	0.285787	1.40839	0.18368
Ankrd9__chr12	0.0790523	0.111276	1.40762	0.076018
Nme2__chr11	0.670417	0.943647	1.40755	0.488596
Vapb__chr2	0.125127	0.176119	1.40752	0.11763
Sptbn1__chr11	0.442609	0.622944	1.40744	0.357702
Laptm4b__chr15	0.110238	0.15515	1.40741	0.104393
Rfwd2__chr1	0.120836	0.169993	1.4068	0.113836
Abcf1__chr17	0.138347	0.194599	1.4066	0.129221
Mtss1l__chr8	0.0893525	0.125666	1.40641	0.0854878
1500011K16Rik__chr2	0.0916153	0.128814	1.40603	0.0875551
Pcca__chr14	0.0943806	0.132676	1.40575	0.0900752
Fxr2__chr11	0.115673	0.162548	1.40523	0.109248
Huwe1__chrX	0.147066	0.206609	1.40487	0.136782
Mrpl19__chr6	0.096797	0.135899	1.40396	0.0922716
Card10__chr15	0.0919691	0.129047	1.40316	0.0878779
Sys1__chr2	0.132039	0.185034	1.40136	0.12371
Slc47a1__chr11	0.0844874	0.118374	1.40109	0.0810271
Ifi44__chr3	0.0862289	0.120757	1.40042	0.0826263
Pam__chr1	0.210479	0.294702	1.40015	0.189831
Fblim1__chr4	0.15085	0.211057	1.39912	0.140042
Gadd45gip1__chr8	0.104705	0.146389	1.39811	0.0994225
Csnk1g2__chr10	0.124095	0.173495	1.39809	0.116719
Mpped2__chr2	0.0807227	0.112848	1.39797	0.0775603
Pdcd11__chr19	0.0855129	0.119542	1.39794	0.0819691
Pgrmc2__chr3	0.124925	0.174625	1.39784	0.117453
Ptov1__chr7	0.127931	0.178825	1.39782	0.120102
Aktip__chr8	0.0876345	0.122475	1.39757	0.0839151
Klc2__chr19	0.0824781	0.115254	1.39739	0.0791784
Psma4__chr9	0.1904	0.265987	1.39699	0.173397
Jup__chr11	0.134883	0.18843	1.39699	0.126199
Suds3__chr5	0.128423	0.179401	1.39696	0.120534
Cebpz__chr17	0.103737	0.144903	1.39683	0.0985508
Rdh13__chr7	0.0843826	0.117854	1.39666	0.0809307
Usp33__chr3	0.101405	0.141559	1.39597	0.0964459
Tmem246__chr4	0.102746	0.143416	1.39583	0.0976567
Cd151__chr7	0.204909	0.285893	1.39522	0.185305
Mrps17__chr5	0.107056	0.14932	1.39479	0.101537
Svip__chr7	0.0824207	0.114884	1.39387	0.0791256
Tspan7__chrX	0.177095	0.246635	1.39267	0.162322
Cox11__chr11	0.0842205	0.117283	1.39257	0.0807817
Mrpl35__chr6	0.102276	0.142385	1.39216	0.0972326
Fam213b__chr4	0.104841	0.14592	1.39183	0.0995449
Wbp1__chr6	0.0930562	0.129439	1.39098	0.0888691
Tcaim__chr9	0.085118	0.118347	1.39038	0.0816065
2810004N23Rik__chr8	0.101563	0.141149	1.38978	0.096588
Bcl9l__chr9	0.0904287	0.125595	1.38889	0.0864716
Alkbh7__chr17	0.0927219	0.128778	1.38886	0.0885644
Uqcc__chr2	0.102224	0.141897	1.38809	0.0971857
Lgals4__chr7	0.0792393	0.109991	1.38808	0.0761908
Mettl9__chr7	0.111766	0.15504	1.38719	0.10576
Mapre2__chr18	0.143883	0.199549	1.38688	0.134029
Metrn__chr17	0.0876671	0.121577	1.38681	0.0839449
Flt1__chr5	0.1359	0.188443	1.38662	0.127088
Ccdc141__chr2	0.084593	0.117265	1.38623	0.0811241
Dnajc7__chr11	0.113765	0.157665	1.38588	0.107547
Psmd12__chr11	0.12793	0.17729	1.38583	0.120101
Osbpl2__chr2	0.0941932	0.130416	1.38456	0.0899046
Bckdk__chr7	0.103823	0.143702	1.38411	0.0986279
Tbc1d16__chr11	0.0942438	0.130395	1.38359	0.0899507
Tsnax__chr8	0.128387	0.177556	1.38297	0.120503
Ubxn6__chr17	0.103143	0.142642	1.38295	0.0980145
Ybey__chr10	0.0955	0.132	1.3822	0.0910934
Clpp__chr17	0.102195	0.141115	1.38085	0.0971588
Fktn__chr4	0.0852805	0.117748	1.38071	0.0817557
Mrpl9__chr3	0.112437	0.155242	1.3807	0.10636
Clic4__chr4	0.267864	0.369773	1.38045	0.235024
B230118H07Rik__chr2	0.0846117	0.116768	1.38005	0.0811413
Ralgapa2__chr2	0.0951124	0.13122	1.37963	0.0907409
Tm9sf2__chr14	0.196405	0.270962	1.37961	0.178346
Zc2hc1a__chr3	0.088212	0.121682	1.37943	0.084444
Eif4g2__chr7	0.582472	0.802908	1.37845	0.441564
Coq3__chr4	0.0907031	0.125001	1.37813	0.0867222
Ubr7__chr12	0.0933533	0.128643	1.37803	0.0891398
Tfam__chr10	0.0979271	0.134911	1.37767	0.0932971
Ccdc181__chr1	0.078714	0.108439	1.37764	0.0757053
Mtfr1l__chr4	0.114906	0.158251	1.37723	0.108564
Ociad1__chr5	0.160093	0.220179	1.37533	0.147956
Tom1l2__chr11	0.102016	0.140203	1.37432	0.0969978
Faf1__chr4	0.0997695	0.137086	1.37403	0.0949662
Nomo1__chr7	0.158044	0.217157	1.37403	0.146208
Adssl1__chr12	0.126988	0.174466	1.37389	0.119271
Micu2__chr14	0.116126	0.159356	1.37226	0.109651
Cdkn1c__chr7	0.115438	0.158411	1.37226	0.109039
Mdp1__chr14	0.108378	0.148688	1.37193	0.102725
Vstm4__chr14	0.0779009	0.106842	1.37151	0.0749534
Dolk__chr2	0.0908582	0.124581	1.37116	0.0868639
Fam78a__chr2	0.0834842	0.114337	1.36957	0.0801045
H2-Ke6__chr17	0.0928034	0.127075	1.36929	0.0886387
Cul2__chr18	0.094945	0.129969	1.36889	0.0905887
Fam20b__chr1	0.121252	0.165962	1.36874	0.114205
Zbtb17__chr4	0.0872764	0.119411	1.3682	0.0835869
Tom1__chr8	0.112424	0.153772	1.36778	0.106349
Slirp__chr12	0.122499	0.167532	1.36762	0.115309
Sirt2__chr7	0.140185	0.191578	1.3666	0.13082
Ccnh__chr13	0.09333	0.12751	1.36623	0.0891186
Gpr116__chr17	0.180166	0.246125	1.36611	0.164891
Gata6__chr18	0.0938765	0.128226	1.3659	0.0896163
Sirt5__chr13	0.0800805	0.109366	1.3657	0.0769677
Cops6__chr5	0.147031	0.200602	1.36436	0.136751
Htatsf1__chrX	0.115678	0.157814	1.36426	0.109252
Rorc__chr3	0.0826094	0.112693	1.36417	0.0792993
Wnk1__chr6	0.274151	0.373943	1.364	0.239819
Setd8__chr5	0.182384	0.248752	1.36389	0.166742
Cpne8__chr15	0.21367	0.291333	1.36347	0.192413
Isca2__chr12	0.115052	0.15681	1.36295	0.108695
Twsg1__chr17	0.113111	0.154131	1.36265	0.106963
Prkab2__chr3	0.0883786	0.120373	1.36201	0.0845965
Pam16__chr16	0.105133	0.143179	1.36188	0.0998081
Rap1gap2__chr11	0.0961047	0.130851	1.36155	0.0916429
Emc10__chr7	0.151138	0.205707	1.36106	0.14029
Lrrc1__chr9	0.0776404	0.105643	1.36067	0.0747123
Egln3__chr12	0.126118	0.171499	1.35983	0.118505
Cst3__chr2	1.13014	1.5368	1.35983	0.312049
2210404J11Rik__chr17	0.0831921	0.113107	1.35959	0.0798357
Tspan3__chr9	0.210545	0.28616	1.35913	0.189885
Cpxm2__chr7	0.0843438	0.114574	1.35842	0.0808951
Taf6__chr5	0.0855166	0.116134	1.35802	0.0819725
Rrn3__chr16	0.102152	0.13869	1.35768	0.0971207
Metap1__chr3	0.113818	0.154511	1.35752	0.107594
Cuedc1__chr11	0.0851395	0.115564	1.35735	0.0816262
Spry2__chr14	0.0875009	0.118761	1.35726	0.0837926
Gstm7__chr3	0.078184	0.10607	1.35667	0.0752152
D5Ertd579e__chr5	0.0881858	0.119507	1.35518	0.0844201
Atg10__chr13	0.0826241	0.111952	1.35495	0.0793128
Med26__chr8	0.0807076	0.109307	1.35436	0.0775464
Mmp15__chr8	0.0956473	0.129499	1.35392	0.0912273
Hras1__chr7	0.123202	0.166641	1.35258	0.11593
Arhgef15__chr11	0.109212	0.147548	1.35102	0.103473
Pdcl3__chr1	0.110237	0.148923	1.35093	0.104392
Srpk3__chrX	0.0836199	0.112849	1.34954	0.0802294
Aimp1__chr3	0.114697	0.154742	1.34913	0.108378
1700120C14Rik__chr15	0.0782606	0.105582	1.34911	0.075286
Fn3k__chr11	0.0795802	0.107356	1.34903	0.0765057
Gm14420__chr2	0.117928	0.159046	1.34868	0.111254
Nr1d1__chr11	0.110114	0.148499	1.34859	0.104282
Urod__chr4	0.0909838	0.122678	1.34835	0.0869786
Zfp563__chr17	0.0792286	0.106781	1.34775	0.0761809
Cul4a__chr8	0.102278	0.137831	1.34762	0.0972338
Atad1__chr19	0.126558	0.17055	1.34761	0.118892
Ube2m__chr7	0.182371	0.245678	1.34713	0.166731
3110057O12Rik__chr3	0.0803952	0.108237	1.34631	0.0772581
Rapgef3__chr15	0.0904716	0.121779	1.34604	0.0865108
Nt5c3__chr6	0.10149	0.136576	1.34571	0.0965226
Creld1__chr6	0.0960296	0.129222	1.34564	0.0915747
Nipal3__chr4	0.0861383	0.115902	1.34554	0.0825431
Phf20l1__chr15	0.127677	0.171775	1.34539	0.119878
Nudt8__chr19	0.0998598	0.134318	1.34506	0.095048
Cobll1__chr2	0.0850534	0.114389	1.34491	0.0815471
Emcn__chr3	0.136862	0.184055	1.34483	0.127926
Sumo1__chr1	0.130427	0.175326	1.34425	0.122296
Arhgap21__chr2	0.0974376	0.130965	1.34409	0.092853
Ap4s1__chr12	0.0998551	0.13414	1.34335	0.0950438
Ndufaf5__chr2	0.084709	0.11378	1.34319	0.0812307
Exoc8__chr8	0.0991846	0.133217	1.34313	0.0944366
Hemk1__chr9	0.0844249	0.113368	1.34283	0.0809696
Abhd8__chr8	0.0875635	0.117582	1.34282	0.08385
Tarsl2__chr7	0.079246	0.106409	1.34276	0.076197
Me3__chr7	0.0867885	0.11653	1.34268	0.0831396
Naa35__chr13	0.104324	0.140046	1.34242	0.0990792
Obsl1__chr1	0.0825859	0.110793	1.34155	0.0792777
Sms__chrX	0.0926902	0.124333	1.34139	0.0885355
Kansl3__chr1	0.0997148	0.133726	1.34108	0.0949167
Ankrd17__chr5	0.16194	0.217161	1.34099	0.149528
Insr__chr8	0.0993494	0.133227	1.34099	0.0945859
Nkain1__chr4	0.0808522	0.108364	1.34027	0.0776798
Mmgt1__chrX	0.113487	0.152103	1.34027	0.107298
Sar1b__chr11	0.139812	0.1873	1.33965	0.130496
Cdk2ap1__chr5	0.188471	0.252444	1.33943	0.1718
Dram2__chr3	0.128284	0.17174	1.33875	0.120413
Rabac1__chr7	0.219924	0.294421	1.33874	0.197449
Asb8__chr15	0.104252	0.139562	1.3387	0.0990146
Eml2__chr7	0.0804287	0.107663	1.33862	0.0772891
Dhrs11__chr11	0.0836457	0.111968	1.3386	0.0802531
Ccnk__chr12	0.11335	0.151706	1.33838	0.107176
Aqp1__chr6	0.185605	0.248303	1.3378	0.169422
Timm21__chr18	0.0837078	0.111967	1.33759	0.0803102
Echdc2__chr4	0.0852097	0.113969	1.33752	0.0816907
Mrps14__chr1	0.121163	0.162033	1.33732	0.114126
Nob1__chr8	0.0860378	0.115058	1.33729	0.0824509
Prps1__chrX	0.0938638	0.125511	1.33716	0.0896048
Fig4__chr10	0.102802	0.137412	1.33667	0.0977073
Mzt1__chr14	0.101375	0.135503	1.33665	0.0964184
Phospho2__chr2	0.0860469	0.11501	1.33659	0.0824593
Cirbp__chr10	0.0992043	0.132554	1.33617	0.0944545
Ddt__chr10	0.0931499	0.124396	1.33544	0.0889545
Iigp1__chr18	0.0953865	0.12736	1.3352	0.0909901
Gfm1__chr3	0.0971804	0.12975	1.33514	0.0926196
Ubac1__chr2	0.0950719	0.12691	1.33488	0.0907041
Vwa3a__chr7	0.0781969	0.104372	1.33474	0.0752272
Osgepl1__chr1	0.0780111	0.10412	1.33468	0.0750553
Ccnd2__chr6	0.187529	0.250279	1.33462	0.171019
B3gnt1__chr19	0.0976445	0.130315	1.33459	0.0930407
Rprd1a__chr18	0.0859683	0.114709	1.33432	0.0823872
Abhd11__chr5	0.0868743	0.115904	1.33415	0.0832182
Slc36a2__chr11	0.0838819	0.111904	1.33407	0.0804704
Eif3h__chr15	0.196919	0.262628	1.33369	0.178768
Ints9__chr14	0.0877436	0.117022	1.33368	0.084015
Acot1__chr12	0.0870808	0.116136	1.33366	0.0834076
Tysnd1__chr10	0.0854714	0.113968	1.3334	0.081931
Hspd1__chr1	0.209665	0.279547	1.3333	0.189172
Uck2__chr1	0.118123	0.157459	1.33301	0.111428
Azi2__chr9	0.102026	0.13599	1.33289	0.0970066
Pycrl__chr15	0.0910123	0.121305	1.33284	0.0870046
Apbb2__chr5	0.124516	0.165959	1.33283	0.117092
Smpd2__chr10	0.0905397	0.120673	1.33281	0.086573
Prkaa2__chr4	0.104487	0.139243	1.33264	0.099226
Ldha__chr7	0.833949	1.1109	1.33209	0.203483
Dnajc5__chr2	0.15342	0.204345	1.33193	0.142251
Amz2__chr11	0.0945031	0.125837	1.33156	0.0901867
Sar1a__chr10	0.190117	0.253123	1.33141	0.173162
Klhdc3__chr17	0.110157	0.14665	1.33128	0.10432
Pcbp2__chr15	0.100876	0.134268	1.33102	0.0959675
Gid4__chr11	0.0912215	0.12139	1.33072	0.0871956
Eltd1__chr3	0.129084	0.171774	1.33071	0.121116
Tmem256__chr11	0.15639	0.208097	1.33062	0.144795
Ube2g1__chr11	0.111427	0.148227	1.33026	0.105457
Slc25a46__chr18	0.122059	0.162352	1.33011	0.114919
Fastk__chr5	0.100074	0.13311	1.33011	0.0952422
Selenbp1__chr3	0.0873826	0.116228	1.33011	0.0836842
Nsun4__chr4	0.084181	0.111969	1.33009	0.0807454
Specc1l__chr10	0.0961238	0.127831	1.32985	0.0916602
Kif13a__chr13	0.101557	0.135034	1.32963	0.096583
Pet112__chr3	0.0808676	0.107512	1.32948	0.0776941
Abcb8__chr5	0.0944746	0.125592	1.32937	0.0901607
Zfp148__chr16	0.114802	0.15258	1.32908	0.108471
Mrps34__chr17	0.0983079	0.130654	1.32903	0.0936423
Eml1__chr12	0.0976847	0.129806	1.32882	0.0930772
Abcd1__chrX	0.0906364	0.120419	1.32859	0.0866614
Isoc1__chr18	0.090873	0.12073	1.32855	0.0868775
Pcdh17__chr14	0.0879453	0.11684	1.32855	0.0841998
Zfp811__chr17	0.0919443	0.122148	1.3285	0.0878553
2310040G24Rik__chr6	0.076093	0.101088	1.32848	0.0732792
Large__chr8	0.0930072	0.123523	1.3281	0.0888245
Acadsb__chr7	0.109279	0.145052	1.32735	0.103534
Kpna6__chr4	0.108576	0.144056	1.32677	0.102903
Dnajb4__chr3	0.0957185	0.126975	1.32654	0.0912919
Gdpd5__chr7	0.0858385	0.113855	1.32638	0.082268
Mrpl16__chr19	0.102621	0.136089	1.32614	0.0975434
Cacnb2__chr2	0.0804882	0.106705	1.32572	0.077344
Nudt18__chr14	0.0892429	0.118292	1.32551	0.0853875
Ei24__chr9	0.113799	0.150833	1.32544	0.107577
Leo1__chr9	0.0834541	0.110602	1.3253	0.0800769
Arl6ip5__chr6	0.115848	0.153527	1.32524	0.109404
Tubb4b__chr2	0.231479	0.30676	1.32522	0.206671
Brd7__chr8	0.112009	0.148341	1.32437	0.105977
Acbd6__chr1	0.100512	0.133086	1.32408	0.0956384
Kif3a__chr11	0.124024	0.164207	1.324	0.116657
Serpinb9__chr13	0.0893782	0.118332	1.32395	0.0855113
Ift81__chr5	0.083497	0.110507	1.32348	0.0801163
Mrps9__chr1	0.100565	0.133095	1.32347	0.0956861
Ide__chr19	0.131502	0.17403	1.32341	0.123239
Ppap2a__chr13	0.110869	0.146646	1.3227	0.104958
Bmpr1a__chr14	0.09498	0.125627	1.32267	0.0906205
Cluh__chr11	0.127718	0.168892	1.32238	0.119915
Chd9__chr8	0.0987017	0.130513	1.3223	0.0939992
Map3k4__chr17	0.0841534	0.111243	1.32191	0.08072
Pacsin2__chr15	0.136538	0.180453	1.32163	0.127644
Bloc1s5__chr13	0.0844135	0.111548	1.32145	0.0809591
Ucp3__chr7	0.0842423	0.111315	1.32137	0.0808017
Rtn2__chr7	0.10236	0.135249	1.32131	0.0973082
Chp1__chr2	0.145538	0.192263	1.32105	0.135461
Spg7__chr8	0.10937	0.144459	1.32083	0.103615
Kti12__chr4	0.0913016	0.120566	1.32052	0.0872688
Psmc6__chr14	0.131873	0.174131	1.32044	0.123564
Prkce__chr17	0.0934757	0.123398	1.3201	0.0892513
Parm1__chr5	0.0936339	0.123605	1.32008	0.0893954
Nr0b2__chr4	0.0771577	0.101833	1.3198	0.0742655
Ttc7b__chr12	0.095097	0.125508	1.31979	0.090727
Gtpbp2__chr17	0.108831	0.143632	1.31977	0.103131
Fam101b__chr11	0.152556	0.201331	1.31972	0.141508
Mamstr__chr7	0.0764682	0.100903	1.31955	0.0736269
Poglut1__chr16	0.0923185	0.121775	1.31908	0.0881967
Plk1s1__chr2	0.0839179	0.110639	1.31842	0.0805034
Rnf123__chr9	0.0799002	0.105311	1.31804	0.0768012
Kcmf1__chr6	0.149825	0.197441	1.31781	0.13916
Enah__chr1	0.0874321	0.115205	1.31765	0.0837296
Ergic2__chr6	0.0954983	0.125831	1.31762	0.0910919
Chpf__chr1	0.116558	0.153568	1.31752	0.110036
Flnc__chr6	0.106913	0.140851	1.31744	0.101409
Trak2__chr1	0.141072	0.185829	1.31726	0.131591
Nkiras1__chr14	0.0873817	0.115096	1.31716	0.0836834
Fech__chr18	0.119537	0.157347	1.31631	0.112683
Grk5__chr19	0.0902095	0.118743	1.3163	0.0862713
Zer1__chr2	0.0901521	0.118664	1.31627	0.0862188
1110018G07Rik__chr12	0.0962451	0.126654	1.31596	0.0917704
Strap__chr6	0.132555	0.174422	1.31584	0.124162
Josd2__chr7	0.105709	0.139052	1.31543	0.100326
Abra__chr15	0.0796446	0.104766	1.31542	0.0765652
Fdft1__chr14	0.0985439	0.129588	1.31502	0.0938562
Oxnad1__chr14	0.0839787	0.110316	1.31362	0.0805593
Stom__chr2	0.145835	0.191494	1.31309	0.135718
Xk__chrX	0.0761893	0.100016	1.31273	0.0733684
Il27ra__chr8	0.0804454	0.105586	1.31252	0.0773045
Cyp26b1__chr6	0.0803591	0.105456	1.31231	0.0772248
Atp5s__chr12	0.082912	0.108806	1.3123	0.079578
Hrsp12__chr15	0.0797349	0.104631	1.31224	0.0766486
Pex13__chr11	0.0879428	0.115393	1.31214	0.0841975
Cbx2__chr11	0.0778168	0.102028	1.31113	0.0748755
Rab22a__chr2	0.106032	0.13901	1.31103	0.100617
Egflam__chr15	0.0791015	0.103698	1.31094	0.0760635
Pcbp4__chr9	0.0903427	0.118389	1.31044	0.086393
Wnk2__chr13	0.0820612	0.10753	1.31036	0.0787944
Ppp3cc__chr14	0.0796949	0.104421	1.31025	0.0766116
Pnck__chrX	0.0759843	0.0995484	1.31012	0.0731785
Vamp2__chr11	0.121487	0.159093	1.30955	0.114412
Klhl41__chr2	0.0816259	0.106882	1.30942	0.0783932
Vps4a__chr8	0.102226	0.133844	1.3093	0.0971867
Otud6b__chr4	0.10123	0.132523	1.30914	0.0962869
St3gal2__chr8	0.0959208	0.125554	1.30894	0.0914758
Txnrd3__chr6	0.0794991	0.104038	1.30867	0.0764308
Tmem143__chr7	0.0879469	0.115057	1.30826	0.0842012
Pank1__chr19	0.0895234	0.117119	1.30825	0.0856441
Mrpl53__chr6	0.105796	0.138398	1.30816	0.100405
Ptrh2__chr11	0.0850721	0.11128	1.30807	0.0815643
Bag2__chr1	0.0837372	0.109511	1.30779	0.0803373
C330018D20Rik__chr18	0.0824375	0.107797	1.30761	0.0791411
Chchd4__chr6	0.0919063	0.120157	1.30739	0.0878206
Nampt__chr12	0.143796	0.187984	1.3073	0.133954
Daam1__chr12	0.0954613	0.124789	1.30722	0.0910582
Klf9__chr19	0.142521	0.186222	1.30662	0.132849
Zfp653__chr9	0.0821189	0.107291	1.30653	0.0788475
Aldh2__chr5	0.224469	0.293269	1.3065	0.201089
Csdc2__chr15	0.0836731	0.109289	1.30614	0.0802783
Ralgapa1__chr12	0.127094	0.165988	1.30602	0.119365
Slc31a2__chr4	0.0894251	0.116785	1.30596	0.0855542
Fgf16__chrX	0.0791316	0.103337	1.30588	0.0760913
Cdnf__chr2	0.0845114	0.110341	1.30564	0.0810491
Tmem109__chr19	0.174135	0.227291	1.30526	0.159839
Eif3m__chr2	0.123385	0.160992	1.3048	0.116092
Psmd4__chr3	0.162694	0.212275	1.30475	0.15017
Clptm1__chr7	0.172601	0.225138	1.30439	0.158549
St6galnac6__chr2	0.0866982	0.113075	1.30424	0.0830567
Tmem230__chr2	0.0902654	0.117725	1.30421	0.0863224
Hspa1b__chr17	0.104049	0.135651	1.30372	0.0988314
Kank1__chr19	0.086272	0.112457	1.30352	0.0826658
Zfp428__chr7	0.081123	0.105719	1.3032	0.0779296
Urgcp__chr11	0.0932361	0.121505	1.30319	0.0890331
Gbp6__chr5	0.0831396	0.108335	1.30305	0.0797875
Mtg1__chr7	0.082181	0.107063	1.30277	0.0789048
Mtif2__chr11	0.0954636	0.124348	1.30257	0.0910603
Mast2__chr4	0.106794	0.139095	1.30246	0.101303
Fuom__chr7	0.0794355	0.103432	1.30209	0.0763721
Fbxo11__chr17	0.108902	0.141776	1.30186	0.103195
Clybl__chr14	0.101672	0.132353	1.30177	0.0966867
Pdk1__chr2	0.11134	0.144931	1.3017	0.105379
Ppp2r5c__chr12	0.154474	0.201049	1.30151	0.143154
Phb2__chr6	0.140874	0.183348	1.30151	0.131419
Mrpl39__chr16	0.101052	0.13147	1.30101	0.0961265
2700060E02Rik__chr14	0.163951	0.213276	1.30085	0.151238
Nrn1__chr13	0.0791761	0.102982	1.30067	0.0761324
Klhl21__chr4	0.0946434	0.123091	1.30058	0.0903143
Irx4__chr13	0.0797149	0.103597	1.2996	0.0766301
Supt3__chr17	0.0826502	0.107388	1.29931	0.0793369
Erlec1__chr11	0.109122	0.141741	1.29892	0.103392
Uba52__chr8	0.70941	0.921433	1.29887	0.491839
Ppp1r11__chr17	0.122482	0.159036	1.29845	0.115293
Slc25a34__chr4	0.0830146	0.107775	1.29827	0.0796724
Tspan12__chr6	0.0928671	0.120563	1.29823	0.0886967
Wdsub1__chr2	0.0848411	0.11014	1.29819	0.0813521
Atad3a__chr4	0.0972457	0.126242	1.29818	0.0926789
Ube3a__chr7	0.133976	0.173902	1.29801	0.125406
Keap1__chr9	0.114615	0.148769	1.29799	0.108304
Dffa__chr4	0.0881505	0.114393	1.2977	0.0843877
Ppp6r3__chr19	0.121403	0.157515	1.29746	0.114338
Hsp90ab1__chr17	0.969466	1.25751	1.29712	0.253048
Mmaa__chr8	0.0828692	0.107484	1.29704	0.0795386
Osbpl1a__chr18	0.094471	0.122487	1.29656	0.0901575
Abca2__chr2	0.091746	0.118937	1.29638	0.0876744
Emp2__chr16	0.101776	0.131919	1.29616	0.0967811
Dcun1d4__chr5	0.0794349	0.10289	1.29528	0.0763715
Coq6__chr12	0.0858231	0.111113	1.29467	0.0822539
Zmynd11__chr13	0.177807	0.230198	1.29465	0.162919
Mreg__chr1	0.0816275	0.105588	1.29354	0.0783948
Pnpo__chr11	0.0817642	0.105731	1.29312	0.0785207
Rnf6__chr5	0.104282	0.134815	1.29279	0.0990415
Tmem88__chr11	0.147985	0.19124	1.29229	0.137575
Irx3__chr8	0.0790276	0.102118	1.29218	0.0759952
Mettl5__chr2	0.0821611	0.106142	1.29187	0.0788864
Suclg2__chr6	0.0928987	0.120012	1.29186	0.0887256
Tmbim4__chr10	0.128463	0.165932	1.29167	0.12057
Agtr1a__chr13	0.0814232	0.105155	1.29146	0.0782064
Tusc2__chr9	0.0879308	0.113555	1.29141	0.0841865
Itga9__chr9	0.106213	0.137105	1.29086	0.10078
Krit1__chr5	0.0968048	0.124955	1.29079	0.0922787
Gstk1__chr6	0.0949832	0.122572	1.29046	0.0906234
Zfp358__chr8	0.0861986	0.111224	1.29032	0.0825985
Gosr2__chr11	0.111082	0.143291	1.28996	0.105148
Gstz1__chr12	0.0875018	0.112865	1.28985	0.0837935
Aldh5a1__chr13	0.0815383	0.105165	1.28977	0.0783125
Myh7b__chr2	0.0860543	0.110983	1.28968	0.0824661
Slc25a39__chr11	0.205654	0.265219	1.28964	0.185912
Zswim7__chr11	0.0837949	0.108055	1.28952	0.0803903
Pafah1b1__chr11	0.183636	0.236722	1.28908	0.167785
Rgp1__chr4	0.0927984	0.119593	1.28874	0.0886342
Commd3__chr2	0.109177	0.140697	1.28871	0.103441
Tesk1__chr4	0.103891	0.133882	1.28868	0.0986891
Aldh1b1__chr4	0.0770591	0.0992903	1.2885	0.0741742
Fbxw5__chr2	0.102672	0.132261	1.28819	0.0975899
Tomm20__chr8	0.184576	0.237758	1.28813	0.168567
Ubap2__chr4	0.12595	0.162239	1.28813	0.118356
Fry__chr5	0.088303	0.113725	1.2879	0.0845273
Mrps28__chr3	0.106187	0.136737	1.2877	0.100757
Churc1__chr12	0.0987339	0.127108	1.28738	0.0940284
Serac1__chr17	0.0812014	0.104532	1.28731	0.0780019
Scarb1__chr5	0.096758	0.124531	1.28704	0.0922362
Prpf40b__chr15	0.0804345	0.103508	1.28685	0.0772945
Kcnn1__chr8	0.0794391	0.102224	1.28682	0.0763754
Gnl2__chr4	0.104005	0.1338	1.28648	0.0987919
Palmd__chr3	0.0990489	0.127381	1.28605	0.0943138
2610044O15Rik8__chr8	0.0828198	0.106455	1.28538	0.0794931
Map4__chr9	0.192693	0.247515	1.28451	0.17529
P4htm__chr9	0.0816445	0.104871	1.28448	0.0784104
Wdtc1__chr4	0.0934102	0.11998	1.28445	0.0891916
Bdh1__chr16	0.0873957	0.112239	1.28426	0.0836963
Tfrc__chr16	0.105448	0.135391	1.28396	0.100091
Ogfod3__chr11	0.0935234	0.120055	1.28369	0.0892947
Cabin1__chr10	0.0949695	0.1219	1.28357	0.0906109
Emc9__chr14	0.0869573	0.111598	1.28337	0.0832944
Mid1ip1__chrX	0.125973	0.161612	1.28292	0.118377
Med24__chr11	0.096439	0.123693	1.2826	0.0919466
Plin4__chr17	0.0843215	0.108149	1.28257	0.0808746
Zfp445__chr9	0.117153	0.150231	1.28235	0.110565
Aph1a__chr3	0.112158	0.143792	1.28205	0.106111
Fam122a__chr19	0.120693	0.154731	1.28202	0.113709
Surf1__chr2	0.090122	0.115429	1.28081	0.0861913
Arfgef2__chr2	0.109032	0.139642	1.28075	0.103311
Eif2b5__chr16	0.105781	0.135474	1.2807	0.100391
Apba3__chr10	0.087346	0.111854	1.28059	0.0836507
Mpp3__chr11	0.0762164	0.0975839	1.28035	0.0733935
Epc2__chr2	0.0931465	0.119214	1.27985	0.0889514
Ankrd46__chr15	0.0962392	0.123152	1.27965	0.0917651
Usp20__chr2	0.0837438	0.107157	1.27958	0.0803433
Mettl8__chr2	0.0799775	0.102323	1.2794	0.0768726
Hsbp1__chr8	0.147835	0.18904	1.27872	0.137445
Rpl37__chr15	0.0822979	0.105198	1.27826	0.0790125
Cnot7__chr8	0.100263	0.12816	1.27824	0.095413
Mllt4__chr17	0.133933	0.171173	1.27805	0.125368
Il11ra1__chr4	0.0845163	0.107998	1.27783	0.0810537
Cxx1b__chrX	0.0808913	0.103353	1.27767	0.0777159
Setd3__chr12	0.120069	0.153399	1.27759	0.113156
Krt222__chr11	0.0773357	0.0988007	1.27756	0.0744303
Ago1__chr4	0.0956115	0.122145	1.27751	0.0911947
Ipo8__chr6	0.0956034	0.122116	1.27732	0.0911873
Uckl1__chr2	0.0931717	0.118967	1.27686	0.0889744
Rbbp7__chrX	0.151996	0.194059	1.27674	0.141028
Stk40__chr4	0.11103	0.141713	1.27634	0.105102
Atp6v1d__chr12	0.152919	0.195165	1.27626	0.14182
Romo1__chr2	0.143875	0.183578	1.27595	0.134022
St3gal3__chr4	0.0872701	0.111346	1.27587	0.0835812
Atp6v0a1__chr11	0.176989	0.225804	1.27581	0.162234
Tmod1__chr4	0.0772085	0.098492	1.27566	0.0743125
Ppp2r2d__chr7	0.116883	0.14909	1.27556	0.110325
Gstm5__chr3	0.0902445	0.115045	1.27481	0.0863033
Ppa2__chr3	0.103168	0.131517	1.27479	0.0980372
Mrps21__chr3	0.142664	0.181827	1.27451	0.132972
Zc3h7b__chr15	0.0894123	0.113933	1.27424	0.0855425
Dlc1__chr8	0.11951	0.152195	1.27349	0.11266
Snrnp48__chr13	0.0982209	0.125045	1.27309	0.0935635
Anapc5__chr5	0.193295	0.246058	1.27297	0.175786
Ctdsp1__chr1	0.136807	0.174137	1.27287	0.127879
Tdrd3__chr14	0.0888905	0.113138	1.27278	0.0850651
Cops7a__chr6	0.121019	0.154017	1.27267	0.113998
Thrb__chr14	0.0787821	0.100237	1.27233	0.0757683
Arl2bp__chr8	0.115621	0.147108	1.27232	0.109202
Brcc3__chrX	0.0988034	0.125679	1.27201	0.0940914
Ngly1__chr14	0.0895303	0.113856	1.2717	0.0856504
Ppip5k2__chr1	0.0989573	0.125825	1.27151	0.0942308
Pgm5__chr19	0.0931725	0.11846	1.27141	0.0889751
Arhgef5__chr6	0.0857133	0.108897	1.27049	0.0821531
Cars2__chr8	0.0846584	0.10755	1.2704	0.0811842
Mlxipl__chr5	0.090028	0.11437	1.27038	0.0861054
Cpeb3__chr19	0.0943686	0.119883	1.27037	0.0900643
Wipi2__chr5	0.0902915	0.114695	1.27028	0.0863462
Hdgfrp2__chr17	0.0969266	0.123115	1.27019	0.0923892
Fbxo3__chr2	0.100783	0.12797	1.26977	0.0958829
Gpbp1__chr13	0.125339	0.159126	1.26956	0.117818
Dnpep__chr1	0.109004	0.138362	1.26934	0.103286
Psmc2__chr5	0.168114	0.213356	1.26911	0.154764
Deb1__chr9	0.0985439	0.125043	1.26891	0.0938562
Ercc5__chr1	0.0863383	0.10955	1.26885	0.0827267
Otud4__chr8	0.106642	0.135278	1.26852	0.101166
Zfyve21__chr12	0.0916211	0.116152	1.26774	0.0875604
Ash2l__chr8	0.100476	0.12735	1.26747	0.0956054
Fundc1__chrX	0.0921324	0.116712	1.26679	0.0880269
Map2k5__chr9	0.0795032	0.100709	1.26673	0.0764346
Dbndd2__chr2	0.0975183	0.123505	1.26648	0.0929263
Fam174a__chr1	0.114793	0.145353	1.26622	0.108463
Ppt2__chr17	0.103005	0.130387	1.26583	0.0978899
Plekhf1__chr7	0.0809575	0.102443	1.26539	0.077777
Pja2__chr17	0.13081	0.165495	1.26515	0.122632
Acsf3__chr8	0.0802329	0.101493	1.26498	0.0771083
Rit1__chr3	0.109772	0.138849	1.26488	0.103975
Adcy5__chr16	0.083521	0.105642	1.26485	0.0801384
Lipt1__chr1	0.0769153	0.0972592	1.2645	0.0740411
Rnf7__chr9	0.130559	0.16507	1.26433	0.122412
Hbegf__chr18	0.0962484	0.121665	1.26407	0.0917734
Rhobtb2__chr14	0.079466	0.100448	1.26404	0.0764002
Nudt16__chr9	0.0823607	0.104043	1.26326	0.0790703
Gatad1__chr5	0.129426	0.163472	1.26305	0.121417
Bre__chr5	0.0934131	0.117982	1.26301	0.0891943
Mrps16__chr14	0.112728	0.142354	1.26281	0.10662
Polr2j__chr5	0.0994084	0.12552	1.26267	0.0946394
Abhd6__chr14	0.0778916	0.0983256	1.26234	0.0749448
Gtf2i__chr5	0.135778	0.171393	1.26231	0.12698
Spryd4__chr10	0.0853438	0.107723	1.26223	0.0818139
C1qbp__chr11	0.127746	0.161189	1.26179	0.119939
Prkd1__chr12	0.0790798	0.0997686	1.26162	0.0760434
Gm20594__chr6	0.0825464	0.104141	1.2616	0.0792414
Hsf4__chr8	0.0753413	0.0950481	1.26157	0.0725822
Klhl30__chr1	0.0785917	0.0991103	1.26108	0.0755923
Smtn__chr11	0.156709	0.19762	1.26106	0.145067
Mrps2__chr2	0.0978281	0.123363	1.26101	0.0932072
Map7d1__chr4	0.183658	0.231593	1.261	0.167803
Ppm1k__chr6	0.0948142	0.119551	1.2609	0.0904697
Agpat2__chr2	0.102835	0.129651	1.26077	0.0977368
Eif2a__chr3	0.112394	0.141673	1.26051	0.106322
Zfand5__chr19	0.193003	0.243224	1.26021	0.175545
Kcnq1__chr7	0.0877061	0.110515	1.26006	0.0839807
Eps8l1__chr7	0.0767577	0.0967076	1.25991	0.0738951
Flot1__chr17	0.141546	0.178334	1.2599	0.132002
Nme3__chr17	0.0852394	0.107366	1.25958	0.081718
1810011O10Rik__chr8	0.103679	0.130589	1.25955	0.0984979
Mettl20__chr6	0.0808975	0.101849	1.25899	0.0777216
Ly6c1__chr15	0.124191	0.156354	1.25898	0.116804
Pde1c__chr6	0.0854626	0.107596	1.25898	0.0819229
Klhl24__chr16	0.111971	0.140953	1.25883	0.105944
Pigk__chr3	0.102877	0.129488	1.25867	0.0977744
Dohh__chr10	0.0946687	0.119151	1.25861	0.0903373
Dpf2__chr19	0.105935	0.133328	1.25858	0.10053
Klf15__chr6	0.0784897	0.0987764	1.25846	0.075498
Rps6kl1__chr12	0.0752646	0.0947146	1.25842	0.0725111
Wnt9a__chr11	0.0772703	0.0972263	1.25826	0.0743697
Slc25a22__chr7	0.0921611	0.115908	1.25767	0.088053
Kansl2__chr15	0.0820014	0.103119	1.25753	0.0787393
Ier3ip1__chr18	0.199944	0.251353	1.25712	0.181249
Kat2b__chr17	0.112509	0.141425	1.25701	0.106425
Mrm1__chr11	0.0815749	0.10253	1.25689	0.0783462
Slc5a6__chr5	0.0795488	0.0999456	1.25641	0.0764767
Wdr41__chr13	0.0959433	0.120521	1.25617	0.0914963
Plekhb2__chr1	0.130895	0.164406	1.25601	0.122707
Dysf__chr6	0.113008	0.141875	1.25544	0.10687
C030006K11Rik__chr15	0.0918008	0.115209	1.25499	0.0877244
U2af1l4__chr7	0.0919352	0.115376	1.25498	0.087847
Arhgap10__chr8	0.0967369	0.12125	1.2534	0.0922171
Angptl2__chr2	0.110151	0.138052	1.2533	0.104315
Ddx50__chr10	0.113623	0.142356	1.25288	0.10742
Spg20__chr3	0.090076	0.112852	1.25286	0.0861493
Phtf2__chr5	0.0947543	0.118698	1.25269	0.0904152
Kptn__chr7	0.0845063	0.105853	1.25261	0.0810445
Grcc10__chr6	0.188922	0.236613	1.25243	0.172174
Fam96b__chr8	0.109877	0.137613	1.25243	0.104069
Vezf1__chr11	0.110773	0.138715	1.25225	0.104871
2610305D13Rik__chr4	0.0862473	0.108002	1.25224	0.0826432
Pex2__chr3	0.0933868	0.116906	1.25185	0.0891704
4930523C07Rik__chr1	0.0956005	0.119629	1.25134	0.0911847
Gnb5__chr9	0.081601	0.102064	1.25076	0.0783703
Efcab2__chr1	0.0801825	0.100281	1.25066	0.0770619
Popdc3__chr10	0.0839699	0.105015	1.25063	0.0805513
Vamp5__chr6	0.106391	0.133055	1.25062	0.10094
Pvrl2__chr7	0.0933954	0.116772	1.2503	0.0891782
Stx4a__chr7	0.121709	0.15214	1.25003	0.114609
Oxld1__chr11	0.0819937	0.102479	1.24984	0.0787322
Sgcb__chr5	0.115822	0.144736	1.24964	0.109381
Jmjd6__chr11	0.099917	0.124835	1.24939	0.0950997
Clpx__chr9	0.0916602	0.114494	1.24912	0.087596
Psg23__chr7	0.08583	0.107208	1.24907	0.0822603
Ntan1__chr16	0.111846	0.139659	1.24867	0.105832
Gpd1l__chr9	0.0967925	0.120858	1.24863	0.0922676
Afap1l1__chr18	0.116518	0.145487	1.24862	0.11
Cmtm8__chr9	0.088827	0.110911	1.24862	0.085007
Mif4gd__chr11	0.100542	0.125525	1.24849	0.0956648
Mrrf__chr2	0.094723	0.118234	1.24821	0.0903868
Colgalt2__chr1	0.0831036	0.103715	1.24803	0.0797543
Acad11__chr9	0.0934579	0.116634	1.24799	0.0892351
Nlrp10__chr7	0.0794585	0.099134	1.24762	0.0763933
Orc4__chr2	0.0874579	0.109083	1.24726	0.0837533
Prune2__chr19	0.0989882	0.12344	1.24702	0.0942588
Slc46a1__chr11	0.0777881	0.0969935	1.24689	0.074849
Akap6__chr12	0.107037	0.133416	1.24645	0.101521
Sqstm1__chr11	0.331172	0.412431	1.24537	0.281963
Cenpb__chr2	0.24634	0.306773	1.24532	0.218376
Usp2__chr9	0.121529	0.151276	1.24478	0.11445
Anapc7__chr5	0.087716	0.109168	1.24457	0.0839898
Camk2d__chr3	0.12584	0.156581	1.24429	0.11826
Echdc3__chr2	0.0785488	0.0977312	1.24421	0.0755526
Ulk2__chr11	0.108114	0.134471	1.24379	0.102488
Ptdss2__chr7	0.0890504	0.110756	1.24375	0.0852114
Yipf4__chr17	0.0998329	0.124118	1.24325	0.0950237
Prkx__chrX	0.105916	0.131656	1.24302	0.100513
Tbc1d7__chr13	0.0843312	0.10482	1.24296	0.0808835
Abcd3__chr3	0.102343	0.127176	1.24264	0.0972929
Spint2__chr7	0.083889	0.104229	1.24247	0.0804769
Whamm__chr7	0.0846206	0.105123	1.24228	0.0811495
Tmem70__chr1	0.114076	0.141704	1.24219	0.107824
Akr1c19__chr13	0.0755457	0.0937911	1.24152	0.0727718
Bcl2l13__chr6	0.0930226	0.115478	1.2414	0.0888385
Dcaf4__chr12	0.0859724	0.106717	1.2413	0.0823909
Nt5m__chr11	0.0848968	0.105376	1.24122	0.0814033
Mios__chr6	0.0849985	0.105494	1.24113	0.0814967
Tie1__chr4	0.170756	0.211872	1.24078	0.156995
Cops8__chr1	0.114784	0.142413	1.24071	0.108455
Tomm5__chr4	0.107099	0.132877	1.24069	0.101577
Agtrap__chr4	0.110463	0.137046	1.24065	0.104594
Cpped1__chr16	0.0925679	0.114836	1.24056	0.0884241
Stap2__chr17	0.0829663	0.102916	1.24046	0.079628
Jrkl__chr9	0.079644	0.0987547	1.23995	0.0765646
Gm15417__chr3	0.0797073	0.098827	1.23987	0.0766231
Pdzd2__chr15	0.0928399	0.115001	1.2387	0.088672
Arfgap2__chr2	0.0970679	0.120222	1.23853	0.0925175
Pdcd4__chr19	0.082605	0.102304	1.23847	0.0792953
Nmi__chr2	0.0913004	0.11307	1.23844	0.0872677
Fahd2a__chr2	0.0791314	0.0979976	1.23842	0.0760911
Ube3b__chr5	0.105676	0.130862	1.23834	0.100297
Mrpl1__chr5	0.0903279	0.111854	1.23831	0.0863795
Srek1ip1__chr13	0.102319	0.126697	1.23826	0.0972708
1110054M08Rik__chr16	0.0796383	0.0986109	1.23823	0.0765594
Gimap6__chr6	0.113885	0.141011	1.23819	0.107653
Sox4__chr13	0.128335	0.158873	1.23795	0.120457
Mmachc__chr4	0.0807399	0.0999437	1.23785	0.0775762
Cdh13__chr8	0.12153	0.150436	1.23785	0.114451
Vti1b__chr12	0.124773	0.154415	1.23757	0.117318
Prkcz__chr4	0.0759903	0.0940178	1.23723	0.073184
Mrps5__chr2	0.0938503	0.11611	1.23718	0.0895925
Zfp943__chr17	0.0828625	0.102489	1.23686	0.0795323
Fgf13__chrX	0.0810858	0.100261	1.23648	0.0778953
Tfdp2__chr9	0.0909528	0.112453	1.23639	0.0869503
Eif4e3__chr6	0.0983618	0.121612	1.23637	0.0936912
Smarcd1__chr15	0.08823	0.109066	1.23616	0.0844605
Ssbp2__chr13	0.0847184	0.104714	1.23603	0.0812393
Metap1d__chr2	0.0824561	0.101916	1.236	0.0791582
Def8__chr8	0.100973	0.124793	1.2359	0.0960552
Acvr2b__chr9	0.0775359	0.095798	1.23553	0.0746156
Lyrm9__chr11	0.0869313	0.107405	1.23551	0.0832705
Smco1__chr16	0.0758637	0.0937204	1.23538	0.0730666
Zfp60__chr7	0.0804912	0.0994353	1.23536	0.0773467
Ppp2r5b__chr19	0.0848934	0.104872	1.23533	0.0814001
Meis2__chr2	0.0909162	0.112304	1.23525	0.0869169
Rhoq__chr17	0.127177	0.157057	1.23495	0.119438
Dnttip1__chr2	0.0910784	0.11247	1.23487	0.087065
Phyhd1__chr2	0.0957491	0.118226	1.23475	0.0913198
Uchl1__chr5	0.0928965	0.1147	1.23471	0.0887236
Fnta__chr8	0.11412	0.140886	1.23454	0.107863
Epn3__chr11	0.0782246	0.096569	1.23451	0.0752527
Tmem100__chr11	0.0814994	0.100608	1.23446	0.0782767
5031425E22Rik__chr5	0.083893	0.103559	1.23442	0.0804805
Dcun1d1__chr3	0.104451	0.128901	1.23408	0.0991937
Olfr1300-ps1__chr2	0.0748212	0.0923094	1.23373	0.0720996
Tmem160__chr7	0.127586	0.157405	1.23372	0.119798
Prkcsh__chr9	0.142238	0.175475	1.23367	0.132603
Hagh__chr17	0.100421	0.123883	1.23364	0.095556
5830417I10Rik__chr3	0.107319	0.132365	1.23338	0.101774
Ulk1__chr5	0.110593	0.1364	1.23335	0.104711
Ttc30a1__chr2	0.0764982	0.0943429	1.23327	0.0736547
Gpaa1__chr15	0.126128	0.15554	1.2332	0.118514
Hipk3__chr2	0.166997	0.205924	1.2331	0.153819
Zfp105__chr9	0.0756922	0.0933286	1.233	0.0729077
Ampd3__chr7	0.0987566	0.12176	1.23293	0.094049
Qrsl1__chr10	0.0854456	0.105342	1.23286	0.0819074
Mrps30__chr13	0.0867652	0.106968	1.23285	0.0831183
Fxn__chr19	0.0859343	0.105938	1.23278	0.082356
Nmnat3__chr9	0.0787138	0.0970352	1.23276	0.0757051
Fbxl20__chr11	0.0890812	0.109809	1.23269	0.0852396
Fbxo8__chr8	0.091583	0.112885	1.2326	0.0875256
Gpr56__chr8	0.113648	0.140033	1.23216	0.107442
Clcn4-2__chr7	0.175371	0.216016	1.23177	0.160877
Cradd__chr10	0.0808915	0.0996307	1.23166	0.0777161
Mpp6__chr6	0.111414	0.137224	1.23165	0.105446
Atraid__chr5	0.117574	0.1448	1.23157	0.11094
Psmb5__chr14	0.186568	0.229712	1.23125	0.170222
Igbp1__chrX	0.107348	0.132161	1.23115	0.1018
Mrps7__chr11	0.111933	0.137803	1.23112	0.105909
Chmp4b__chr2	0.167018	0.205608	1.23105	0.153837
Acot2__chr12	0.0986854	0.121433	1.23051	0.0939844
Get4__chr5	0.10392	0.127861	1.23038	0.0987158
Socs7__chr11	0.0960258	0.118142	1.23032	0.0915712
Foxj2__chr6	0.096513	0.118717	1.23007	0.0920138
Trpv4__chr5	0.0783928	0.0964249	1.23002	0.0754083
H2-T23__chr17	0.10666	0.131173	1.22983	0.101182
Diablo__chr5	0.0968912	0.119158	1.22981	0.0923571
Oplah__chr15	0.0817987	0.100575	1.22954	0.0785525
Ccpg1__chr9	0.103616	0.127379	1.22934	0.0984412
Taf1a__chr1	0.0876818	0.107777	1.22919	0.0839584
Tbc1d4__chr14	0.0956115	0.117491	1.22884	0.0911947
Stk35__chr2	0.0842426	0.103514	1.22876	0.080802
Irx5__chr8	0.078205	0.0960698	1.22844	0.0752347
Nfs1__chr2	0.0933698	0.114671	1.22814	0.0891548
Ccbl1__chr2	0.0804283	0.0987614	1.22794	0.0772887
Tmed1__chr9	0.0862796	0.105944	1.22791	0.0826728
Gm15800__chr5	0.0961571	0.118067	1.22786	0.0916905
Pdlim7__chr13	0.163051	0.200188	1.22777	0.150473
Klhl13__chrX	0.0797784	0.0979456	1.22772	0.0766888
Hipk2__chr6	0.0864247	0.106011	1.22662	0.0828059
Pnrc1__chr4	0.158194	0.194018	1.22646	0.146336
Uba3__chr6	0.101652	0.124634	1.22609	0.0966687
Bsdc1__chr4	0.0866492	0.106232	1.22601	0.0830118
Fam120aos__chr13	0.0843431	0.103403	1.22599	0.0808944
Rasl10a__chr11	0.0750959	0.0920658	1.22598	0.0723546
6330403A02Rik__chr1	0.0749442	0.0918462	1.22553	0.0722138
Map2k4__chr11	0.109002	0.133583	1.22551	0.103285
Rnf114__chr2	0.0986121	0.120829	1.22529	0.093918
Tmeff1__chr4	0.0796574	0.0975931	1.22516	0.076577
Wdr83__chr8	0.0915203	0.112116	1.22504	0.0874684
Lsmem1__chr12	0.0838301	0.102686	1.22493	0.0804227
Nop10__chr2	0.113453	0.138944	1.22468	0.107268
4930402H24Rik__chr2	0.114569	0.140301	1.2246	0.108264
Epha4__chr1	0.0928245	0.113662	1.22448	0.088658
H2afv__chr11	0.109214	0.133721	1.22439	0.103475
Fuz__chr7	0.0753932	0.0923094	1.22437	0.0726304
Parl__chr16	0.123453	0.151126	1.22416	0.116152
Usp47__chr7	0.126408	0.15473	1.22405	0.118761
Cdc16__chr8	0.120417	0.14739	1.22399	0.113464
Nfia__chr4	0.171164	0.209486	1.22389	0.157338
Bcdin3d__chr15	0.0774131	0.0947103	1.22344	0.0745019
Slc50a1__chr3	0.115619	0.141444	1.22337	0.1092
3000002C10Rik__chr9	0.0776221	0.0949593	1.22335	0.0746954
Rapgef1__chr2	0.167626	0.204912	1.22244	0.154352
Lsmd1__chr11	0.104429	0.127645	1.22231	0.0991744
Purb__chr11	0.21626	0.264244	1.22188	0.194503
Fars2__chr13	0.0841119	0.102766	1.22177	0.0806819
Ntf3__chr6	0.0771821	0.0942879	1.22163	0.0742881
Ctbp1__chr5	0.203433	0.248482	1.22145	0.184101
Mrps6__chr16	0.0959185	0.117159	1.22144	0.0914737
Tmem222__chr4	0.0965038	0.11787	1.2214	0.0920054
Araf__chrX	0.112292	0.13714	1.22129	0.106231
Endog__chr2	0.0775573	0.0947066	1.22112	0.0746354
P2ry1__chr3	0.0841932	0.102769	1.22063	0.0807566
Irf2bp1__chr7	0.0935542	0.11418	1.22047	0.0893228
Slc2a8__chr2	0.0848726	0.103572	1.22032	0.081381
Dda1__chr8	0.117015	0.142774	1.22014	0.110442
Akirin2__chr4	0.109387	0.133421	1.21971	0.10363
Vrk2__chr11	0.0769224	0.0938212	1.21969	0.0740476
Polr2c__chr8	0.111541	0.136028	1.21953	0.105559
Sybu__chr15	0.0813353	0.0991863	1.21947	0.0781253
Ube2d1__chr10	0.0936269	0.114168	1.21939	0.089389
Apool__chrX	0.0883659	0.10773	1.21914	0.0845849
Psma7__chr2	0.218504	0.266309	1.21878	0.196308
Mcm3ap__chr10	0.08342	0.101652	1.21856	0.0800455
Serhl__chr15	0.076721	0.0934865	1.21853	0.0738611
Rmdn1__chr4	0.0894359	0.108968	1.2184	0.0855641
Rbm27__chr18	0.0985077	0.12001	1.21828	0.0938234
Grhpr__chr4	0.0903035	0.110011	1.21824	0.0863572
Samd9l__chr6	0.102989	0.12546	1.21818	0.097876
Atn1__chr6	0.113839	0.138652	1.21797	0.107613
Slc25a26__chr6	0.0811863	0.0988815	1.21796	0.077988
Aamdc__chr7	0.0963986	0.117382	1.21767	0.0919099
Clip1__chr5	0.108417	0.131969	1.21723	0.10276
Lztfl1__chr9	0.0876846	0.106729	1.21719	0.083961
Tsc2__chr17	0.117989	0.143614	1.21718	0.111309
Ifi203__chr1	0.130385	0.158686	1.21706	0.122259
Pnrc2__chr4	0.153247	0.186497	1.21697	0.142102
Arhgap44__chr11	0.077266	0.0940215	1.21686	0.0743658
Mrfap1__chr5	0.332058	0.404055	1.21682	0.282599
Mapk12__chr15	0.0820394	0.099811	1.21662	0.0787743
Psma3__chr12	0.211611	0.257444	1.21659	0.190749
Ppp5c__chr7	0.101508	0.123468	1.21634	0.0965388
Rdh14__chr12	0.0922172	0.112156	1.21621	0.0881042
Mrpl54__chr10	0.119935	0.145851	1.21608	0.113037
Neurl4__chr11	0.0845307	0.102776	1.21584	0.0810668
Pigo__chr4	0.0827741	0.100625	1.21566	0.079451
Stard10__chr7	0.0797424	0.0969099	1.21529	0.0766555
Eif4a2__chr16	0.196949	0.239289	1.21498	0.178793
Sesn1__chr10	0.102906	0.12502	1.2149	0.0978012
Slc41a1__chr1	0.0878488	0.106713	1.21474	0.0841114
Inppl1__chr7	0.106935	0.129889	1.21465	0.101429
Slc25a51__chr4	0.130681	0.158706	1.21445	0.122519
Raf1__chr6	0.111266	0.135115	1.21435	0.105313
Plxnd1__chr6	0.130493	0.15843	1.21409	0.122354
Lpgat1__chr1	0.13279	0.161185	1.21383	0.124368
Alg5__chr3	0.104657	0.126988	1.21337	0.0993798
Mrpl48__chr7	0.103405	0.125449	1.21318	0.098251
Zmiz2__chr11	0.111952	0.135799	1.21301	0.105926
Mtmr3__chr11	0.0975721	0.118334	1.21278	0.0929751
Mcf2l__chr8	0.113195	0.137272	1.2127	0.107038
Zfp639__chr3	0.0856273	0.103836	1.21265	0.0820741
Phf14__chr6	0.135671	0.164507	1.21254	0.126887
Lekr1__chr3	0.0794437	0.0963236	1.21248	0.0763796
Cds2__chr2	0.135397	0.164143	1.21231	0.126648
Agpat1__chr17	0.0933305	0.113106	1.21189	0.0891191
Zfp438__chr18	0.0779086	0.0944113	1.21182	0.0749605
Gm16039__chr6	0.080113	0.0970768	1.21175	0.0769977
Chn1__chr2	0.0806889	0.0977743	1.21174	0.0775292
2310067B10Rik__chr11	0.0912392	0.110512	1.21124	0.0872118
Cln6__chr9	0.095622	0.115799	1.21101	0.0912042
Tnrc6b__chr15	0.12349	0.14949	1.21055	0.116185
Ccny__chr18	0.121063	0.146522	1.21029	0.114037
Cyld__chr8	0.0959653	0.116118	1.21	0.0915162
B3gat3__chr19	0.0969106	0.117219	1.20956	0.0923748
Zfand1__chr3	0.0797486	0.0964453	1.20937	0.0766613
Mkks__chr2	0.104851	0.126793	1.20927	0.0995543
Dock6__chr9	0.0914736	0.110596	1.20905	0.0874258
Mrpl32__chr13	0.0946907	0.114475	1.20894	0.0903574
Ttc4__chr4	0.086553	0.104637	1.20893	0.0829236
Npepps__chr11	0.15821	0.191196	1.2085	0.14635
Camk2a__chr18	0.0808374	0.0976666	1.20819	0.0776662
1110007C09Rik__chr13	0.155604	0.187991	1.20814	0.144122
Cdc37l1__chr19	0.093764	0.11327	1.20803	0.0895139
Mdga1__chr17	0.0816097	0.0985644	1.20775	0.0783783
Gcat__chr15	0.0793624	0.0958438	1.20767	0.0763045
Rsad2__chr12	0.110629	0.1336	1.20764	0.104743
Mdm4__chr1	0.0806028	0.0973391	1.20764	0.0774498
E2f3__chr13	0.0842557	0.101743	1.20755	0.080814
Sertad4__chr1	0.0811825	0.0980244	1.20746	0.0779844
Psmd7__chr8	0.169083	0.20416	1.20745	0.155583
Bloc1s1__chr10	0.136555	0.164863	1.20729	0.127659
Carns1__chr19	0.0907296	0.109533	1.20725	0.0867464
Eif4g1__chr16	0.217778	0.262854	1.20698	0.195724
Prrc2b__chr2	0.14865	0.179394	1.20682	0.138148
Phkb__chr8	0.0846324	0.102133	1.20678	0.0811604
Caskin2__chr11	0.0884222	0.106703	1.20674	0.0846365
Trak1__chr9	0.107433	0.129635	1.20667	0.101876
Bfar__chr16	0.136555	0.164748	1.20646	0.127659
Hbs1l__chr10	0.112199	0.13536	1.20642	0.106148
Npepl1__chr2	0.106978	0.129057	1.20639	0.101467
Fam195b__chr11	0.101403	0.122318	1.20625	0.0964441
Mtif3__chr5	0.0843417	0.101732	1.20619	0.0808931
Cbr1__chr16	0.093987	0.113359	1.20611	0.089717
Ppapdc3__chr2	0.0863135	0.104076	1.20579	0.082704
Psmc1__chr12	0.163576	0.19723	1.20574	0.150919
5930403L14Rik__chr4	0.077562	0.093519	1.20573	0.0746398
Ikbkg__chrX	0.0942163	0.113588	1.20561	0.0899256
Rnf166__chr8	0.0950189	0.11455	1.20555	0.0906559
Vta1__chr10	0.0957945	0.115485	1.20555	0.091361
2410015M20Rik__chr17	0.124271	0.14981	1.2055	0.116875
Pts__chr9	0.0921714	0.111101	1.20538	0.0880625
Kank2__chr9	0.111811	0.134768	1.20532	0.1058
Hmg20b__chr10	0.110834	0.13359	1.20532	0.104926
Pno1__chr11	0.110308	0.132954	1.2053	0.104455
Aarsd1__chr11	0.0952622	0.11481	1.2052	0.0908772
Chmp7__chr14	0.0914527	0.110205	1.20505	0.0874067
2210013O21Rik__chrX	0.088206	0.106269	1.20479	0.0844385
Lipe__chr7	0.0892099	0.107478	1.20477	0.0853574
Rab14__chr2	0.249597	0.300596	1.20433	0.220918
Tmem186__chr16	0.0806998	0.097188	1.20432	0.0775392
Zscan22__chr7	0.0757761	0.0912566	1.20429	0.0729854
Bbip1__chr19	0.101729	0.122509	1.20428	0.0967378
Naa10__chrX	0.100702	0.121231	1.20386	0.0958097
Rbfox1__chr16	0.0962107	0.115814	1.20375	0.0917392
Gatc__chr5	0.0959117	0.11542	1.2034	0.0914675
2700070H01Rik__chr14	0.0879925	0.105888	1.20338	0.084243
Nrtn__chr17	0.077261	0.0929674	1.20329	0.0743611
Zfp708__chr13	0.0781649	0.0940522	1.20325	0.0751976
Tbx5__chr5	0.0782166	0.0941026	1.2031	0.0752454
Trpm4__chr7	0.0804588	0.0967945	1.20303	0.0773168
Adprm__chr11	0.0809962	0.0974259	1.20285	0.0778126
Klc1__chr12	0.13545	0.162924	1.20284	0.126694
Inadl__chr4	0.0773598	0.0930513	1.20284	0.0744526
Rhbdd3__chr11	0.0816853	0.0982154	1.20236	0.078448
Polr3gl__chr3	0.0852708	0.102513	1.20221	0.0817468
Rnf40__chr7	0.0969667	0.116574	1.20221	0.0924257
Mrps33__chr6	0.113465	0.136404	1.20218	0.107278
Cdk16__chrX	0.136745	0.164354	1.2019	0.127825
Pak4__chr7	0.0867172	0.104199	1.20159	0.0830742
Il15ra__chr2	0.0825737	0.0991891	1.20122	0.0792665
Pard3__chr8	0.0970903	0.116612	1.20107	0.0925379
Polr2b__chr5	0.105079	0.126189	1.20089	0.0997596
Slc26a10__chr10	0.0915286	0.109908	1.2008	0.087476
Fam65a__chr8	0.135561	0.162745	1.20053	0.126791
Cdc5l__chr17	0.130432	0.156587	1.20053	0.1223
Chd2__chr7	0.10738	0.128901	1.20041	0.101829
Myeov2__chr1	0.142712	0.171276	1.20015	0.133014
Tecpr1__chr5	0.0974757	0.116964	1.19994	0.0928876
Pex6__chr17	0.093002	0.111563	1.19958	0.0888197
Synpo2l__chr14	0.0802947	0.0963191	1.19957	0.0771654
Med10__chr13	0.101118	0.121288	1.19948	0.096186
Krcc1__chr6	0.123702	0.148368	1.1994	0.116372
Trpt1__chr19	0.0784457	0.0940731	1.19921	0.0754572
Psmc5__chr11	0.13643	0.163603	1.19917	0.12755
Acr__chr15	0.0770997	0.0924536	1.19914	0.0742118
Fam136a__chr6	0.0888331	0.106522	1.19913	0.0850125
Znrd1as__chr17	0.0798362	0.0957273	1.19905	0.0767421
Fbxo18__chr2	0.0960196	0.115119	1.19891	0.0915656
Dmd__chrX	0.110986	0.133012	1.19846	0.105062
Gramd4__chr15	0.0889976	0.106655	1.1984	0.0851631
Zfp85-rs1__chr13	0.076587	0.0917778	1.19835	0.0737369
Rtn4ip1__chr10	0.0908066	0.108818	1.19835	0.0868168
Use1__chr8	0.125667	0.150584	1.19828	0.118107
Pik3c2b__chr1	0.0842432	0.100943	1.19823	0.0808026
1700021F05Rik__chr10	0.103496	0.124005	1.19816	0.0983335
Kars__chr8	0.129283	0.15489	1.19808	0.121291
Tmem69__chr4	0.116229	0.139243	1.198	0.109743
Nap1l5__chr6	0.0750663	0.0899274	1.19797	0.0723271
Tspan13__chr12	0.164992	0.197597	1.19761	0.152121
Gm16516__chr11	0.0773369	0.0926122	1.19752	0.0744314
Slc12a2__chr18	0.096381	0.115417	1.19751	0.0918938
Cers4__chr8	0.105337	0.126139	1.19748	0.0999921
2810407C02Rik__chr3	0.173956	0.208307	1.19747	0.159688
Eva1a__chr6	0.0806382	0.0965552	1.19739	0.0774824
Tob2__chr15	0.131701	0.157678	1.19724	0.123413
Ppp1cb__chr5	0.204882	0.245263	1.19709	0.185283
Arntl__chr7	0.0857085	0.102595	1.19702	0.0821487
Thap1__chr8	0.0865316	0.103574	1.19695	0.082904
C330006A16Rik__chr2	0.0938198	0.112284	1.19681	0.0895647
Ik__chr18	0.142562	0.170619	1.1968	0.132884
Rrm2b__chr15	0.0862459	0.103201	1.19659	0.0826419
Ppp1r13l__chr7	0.100458	0.1202	1.19652	0.0955891
Bmpr2__chr1	0.153248	0.183361	1.1965	0.142103
Cep112__chr11	0.0774583	0.0926761	1.19646	0.0745437
6430571L13Rik__chr9	0.0777791	0.0930529	1.19637	0.0748407
Mmab__chr5	0.0876171	0.104798	1.19609	0.0838991
Abcb4__chr5	0.0804341	0.0961979	1.19598	0.077294
Tmod4__chr3	0.0784707	0.0938437	1.19591	0.0754804
Lrrc3b__chr14	0.079171	0.0946738	1.19581	0.0761277
Plxnb1__chr9	0.0846839	0.101263	1.19577	0.0812077
Fam120c__chrX	0.0833094	0.099611	1.19568	0.0799437
Arfrp1__chr2	0.0996605	0.11916	1.19566	0.0948676
Parvb__chr15	0.125408	0.149936	1.19559	0.117879
Etl4__chr2	0.0997689	0.119273	1.19549	0.0949658
Tbc1d17__chr7	0.0968123	0.115738	1.19549	0.0922855
Rtn4r__chr16	0.0765246	0.0914834	1.19548	0.0736791
Fkrp__chr7	0.0964955	0.115337	1.19525	0.0919979
Gpatch4__chr3	0.095452	0.114082	1.19518	0.0910497
Wdr13__chrX	0.0878167	0.104944	1.19503	0.084082
Kcne1__chr16	0.0774166	0.0925117	1.19499	0.0745051
Lcmt1__chr7	0.09134	0.109105	1.19449	0.0873039
Vps26b__chr9	0.101988	0.12181	1.19436	0.096972
Cct4__chr11	0.188304	0.224882	1.19425	0.171661
Gas6__chr8	0.227769	0.272003	1.1942	0.203722
As3mt__chr19	0.0903625	0.107908	1.19417	0.0864111
Whrn__chr4	0.0816647	0.0975195	1.19415	0.078429
Pkdcc__chr17	0.0807942	0.0964303	1.19353	0.0776263
Aar2__chr2	0.0859575	0.102513	1.1926	0.0823773
Srp54a__chr12	0.0925372	0.110355	1.19254	0.088396
Coprs__chr8	0.0816041	0.0973047	1.1924	0.0783732
Fbxo32__chr15	0.105244	0.125488	1.19236	0.0999078
AI597479__chr1	0.0845757	0.10083	1.19219	0.0811082
Naca__chr10	0.282617	0.336835	1.19184	0.246229
Dgkd__chr1	0.103375	0.123204	1.19181	0.098224
Rnf34__chr5	0.0881196	0.105014	1.19172	0.0843594
Pstk__chr7	0.079738	0.0950228	1.19169	0.0766515
Mrpl33__chr5	0.171148	0.203933	1.19156	0.157325
Ccbl2__chr3	0.0810964	0.0966257	1.19149	0.077905
Ddx1__chr12	0.154935	0.184602	1.19148	0.143549
Camk2g__chr14	0.0940939	0.112104	1.1914	0.0898142
Zfp770__chr2	0.0802951	0.0956486	1.19121	0.0771658
Ppa1__chr10	0.112922	0.1345	1.19109	0.106794
Gbf1__chr19	0.108464	0.129179	1.19099	0.102802
Jmjd4__chr11	0.0783007	0.0932544	1.19098	0.0753232
Gcsh__chr8	0.117674	0.140146	1.19098	0.111028
Ola1__chr2	0.112851	0.134377	1.19075	0.10673
Csnk2b__chr17	0.144617	0.172119	1.19017	0.134665
B4galt4__chr16	0.0886574	0.105501	1.18999	0.0848518
Akr1c14__chr13	0.0780818	0.0929008	1.18979	0.0751207
Ptges3l__chr11	0.0833886	0.0992105	1.18974	0.0800166
Tsr1__chr11	0.090042	0.107113	1.18959	0.0861182
Akap2__chr4	0.209745	0.249447	1.18929	0.189237
Hdac11__chr6	0.0778572	0.0925916	1.18925	0.0749129
Myl6b__chr10	0.0761294	0.0905303	1.18916	0.073313
Tnnt1__chr7	0.0789142	0.093827	1.18898	0.0758903
Tmem192__chr8	0.0859388	0.10216	1.18875	0.0823601
Polr2e__chr10	0.132296	0.157229	1.18847	0.123935
Fcgrt__chr7	0.12407	0.147439	1.18835	0.116698
Sike1__chr3	0.0983252	0.116832	1.18822	0.093658
Mavs__chr2	0.0889563	0.105697	1.18819	0.0851253
Ints4__chr7	0.0921004	0.10942	1.18805	0.0879977
Mapre3__chr5	0.088939	0.105652	1.18791	0.0851095
Gsg1l__chr7	0.0799545	0.0949653	1.18774	0.0768514
Pyroxd1__chr6	0.0764439	0.0907521	1.18717	0.0736044
Gm13375__chr2	0.0750999	0.0891489	1.18707	0.0723583
Glyctk__chr9	0.0775476	0.0920388	1.18687	0.0746264
Wfdc1__chr8	0.0834254	0.0990126	1.18684	0.0800505
Slc25a5__chrX	0.368593	0.437451	1.18681	0.308343
Fgf9__chr14	0.0784559	0.0930963	1.18661	0.0754667
Vwa7__chr17	0.0807396	0.0957595	1.18603	0.0775759
Wbp2__chr11	0.1806	0.214192	1.186	0.165254
Smim7__chr8	0.125345	0.148643	1.18587	0.117823
Abhd10__chr16	0.0807442	0.0957457	1.18579	0.0775802
Rnpepl1__chr1	0.112979	0.133963	1.18573	0.106844
Ptpmt1__chr2	0.112093	0.13289	1.18553	0.106053
Fam109a__chr5	0.0815588	0.0966641	1.18521	0.0783314
Mdn1__chr4	0.0926499	0.109795	1.18505	0.0884988
Pik3ca__chr3	0.135477	0.160536	1.18497	0.126718
Smcr7__chr11	0.0855	0.101303	1.18483	0.0819573
Chrac1__chr15	0.0891677	0.105644	1.18478	0.0853187
Raph1__chr1	0.137626	0.163043	1.18468	0.128593
Rnf187__chr11	0.147465	0.174671	1.1845	0.137126
Cacna1c__chr6	0.102852	0.121816	1.18438	0.0977526
Gm5577__chr6	0.0945813	0.111993	1.18409	0.0902579
Csnk2a1__chr2	0.175969	0.208361	1.18408	0.161378
Cd81__chr7	0.423873	0.501895	1.18407	0.345551
Tpt1__chr14	2.53786	3.00347	1.18346	0.250551
Fam168a__chr7	0.112313	0.132884	1.18316	0.10625
Egln2__chr7	0.108312	0.128126	1.18294	0.102666
Mid2__chrX	0.0834932	0.0987498	1.18273	0.0801128
Rps6ka2__chr17	0.086908	0.102748	1.18226	0.0832492
Lyrm4__chr13	0.0909032	0.107463	1.18217	0.086905
Zmym4__chr4	0.0963801	0.113931	1.1821	0.0918931
Wdyhv1__chr15	0.0835557	0.098758	1.18194	0.0801703
Prorsd1__chr11	0.0930142	0.109934	1.1819	0.0888308
Pop7__chr5	0.0888956	0.105036	1.18156	0.0850698
Mrps26__chr2	0.0978892	0.115652	1.18146	0.0932627
Ntn1__chr11	0.0898925	0.106192	1.18132	0.0859816
Tspyl4__chr10	0.0798667	0.0943478	1.18132	0.0767703
Fxr1__chr3	0.105165	0.124228	1.18126	0.099837
Hacl1__chr14	0.0782555	0.0924289	1.18112	0.0752814
H2-Ke2__chr17	0.116731	0.137864	1.18104	0.11019
Drosha__chr15	0.100624	0.118832	1.18095	0.095739
Sox12__chr2	0.0819837	0.0968135	1.18089	0.078723
Adcy9__chr16	0.0868731	0.102584	1.18085	0.0832172
Kcnn2__chr18	0.0755834	0.0892408	1.18069	0.0728067
Bicd2__chr13	0.125853	0.148593	1.18069	0.118271
A930005H10Rik__chr3	0.081	0.0956287	1.1806	0.0778162
Timp4__chr6	0.0978749	0.115547	1.18056	0.0932497
Uba7__chr9	0.0896582	0.105843	1.18051	0.0857673
Tm7sf3__chr6	0.097726	0.11536	1.18044	0.0931147
Pfdn5__chr15	0.168637	0.199045	1.18032	0.155206
Gm5177__chr10	0.0798017	0.0941493	1.17979	0.0767103
Nif3l1__chr1	0.0885466	0.104447	1.17957	0.0847504
Cyp2d22__chr15	0.0914004	0.107796	1.17938	0.087359
Stard13__chr5	0.0863929	0.101882	1.17929	0.0827768
Adrb1__chr19	0.0831061	0.0980037	1.17926	0.0797566
Orc3__chr4	0.0907658	0.107025	1.17914	0.0867795
A530016L24Rik__chr12	0.0774048	0.0912683	1.1791	0.0744943
Mbd3__chr10	0.130122	0.153421	1.17905	0.122028
Atg14__chr14	0.0822773	0.097001	1.17895	0.0789935
Cwc15__chr9	0.137934	0.162611	1.1789	0.128861
Hspa12b__chr2	0.0837151	0.0986885	1.17886	0.080317
Git1__chr11	0.14	0.165039	1.17885	0.130659
Strn3__chr12	0.168401	0.198495	1.1787	0.155007
Tsen15__chr1	0.0903751	0.106522	1.17866	0.0864226
Atpaf2__chr11	0.0933104	0.10993	1.17812	0.0891007
Sfr1__chr19	0.172206	0.202848	1.17794	0.158217
Tmem150a__chr6	0.0880258	0.103687	1.17792	0.0842735
[truncated: 17,498 more rows]

## Sheet: Cluster 5
CLUSTER 5
GENEID	mean non cluster	mean cluster	fold change	p value
Fabp4__chr3	2.62288	22.9407	8.74637	1.32117e-14
Igfbp5__chr1	0.515161	4.21173	8.17555	0.000197228
Cav1__chr6	0.965031	7.44843	7.71833	7.9338e-06
Col4a1__chr8	1.92083	11.4649	5.96871	8.99327e-07
Pecam1__chr11	0.734366	4.3615	5.93914	0.00096997
Egfl7__chr2	0.691233	4.07357	5.89319	0.000742408
Sparcl1__chr5	1.54746	9.04462	5.84483	5.34511e-06
Igfbp3__chr11	0.528852	2.94193	5.56286	0.0166681
Mest__chr6	0.421443	2.2906	5.43513	0.00912457
Gpihbp1__chr15	0.626172	3.38849	5.41144	0.00390139
Sdpr__chr1	1.05184	5.68579	5.40555	0.000769703
Mgll__chr6	0.914317	4.7546	5.20017	0.00250582
Col4a2__chr8	1.52747	7.84451	5.13563	0.000191094
Trp53i11__chr2	0.621089	3.01922	4.86118	0.00379129
Epas1__chr17	0.992904	4.74638	4.7803	0.00355035
Aqp1__chr6	0.723961	3.45257	4.76899	0.00645878
Cdh5__chr8	0.627394	2.94181	4.68893	0.0259051
Tie1__chr4	0.663863	3.11216	4.68795	0.00478593
Flt1__chr5	0.534523	2.46536	4.61227	0.017139
Gng11__chr6	0.598186	2.75723	4.60933	0.0229339
Mcam__chr9	0.556383	2.56118	4.60327	0.0190236
Esam__chr9	0.587468	2.69971	4.5955	0.021893
Gpr116__chr17	0.708706	3.24006	4.57181	0.0060023
Ly6a__chr15	1.23908	5.647	4.55742	0.00175836
Cav2__chr6	0.546586	2.39057	4.37363	0.0181654
Igfbp7__chr5	2.8226	12.1838	4.31654	8.55778e-06
Tspan13__chr12	0.65108	2.7177	4.17415	0.0284586
Eng__chr2	0.836524	3.44674	4.12032	0.0105486
Slc9a3r2__chr17	0.644337	2.63648	4.09177	0.0277186
Ets1__chr9	0.535907	2.18361	4.0746	0.0172551
Podxl__chr6	0.647162	2.59806	4.01455	0.0280273
Emcn__chr3	0.548415	2.19138	3.99584	0.0183239
Snrk__chr9	0.700647	2.77531	3.96107	0.0342171
Cd34__chr1	0.719787	2.84012	3.94578	0.0365897
Cd300lg__chr11	0.727989	2.86286	3.93256	0.0376316
Tspan7__chrX	0.713518	2.79977	3.9239	0.0358036
Cxcl12__chr6	0.863372	3.36872	3.90182	0.0117228
Eltd1__chr3	0.518625	2.01979	3.89451	0.0158373
Icam2__chr11	0.434258	1.68751	3.88595	0.0709665
Tm4sf1__chr3	1.11843	4.30588	3.84994	0.00581584
Vash1__chr12	0.511454	1.96157	3.83529	0.0936978
Tmem88__chr11	0.595755	2.24546	3.7691	0.0226955
Tmem204__chr17	0.47797	1.79948	3.76484	0.0835986
Ly6e__chr15	2.59543	9.67373	3.72721	0.000369743
Ctla2a__chr13	0.658051	2.44399	3.71398	0.0292346
Gimap6__chr6	0.458044	1.6947	3.69985	0.0777588
S1pr1__chr3	0.590435	2.17293	3.68022	0.0221784
Ly6c1__chr15	0.500744	1.83555	3.66565	0.0904302
Gpr56__chr8	0.45774	1.67029	3.649	0.0776706
Cd93__chr2	1.75583	6.36896	3.62732	0.00223957
Ptprb__chr10	0.717666	2.60138	3.62477	0.0363228
Ushbp1__chr8	0.460915	1.66206	3.60599	0.0785918
Plxnd1__chr6	0.52605	1.88948	3.59182	0.098205
Nes__chr3	0.576255	2.02467	3.5135	0.0208322
Kank3__chr17	0.447574	1.55509	3.47449	0.0747442
Col18a1__chr10	0.394576	1.34915	3.41925	0.0601032
Lims2__chr18	0.545403	1.86021	3.41071	0.104273
Kitl__chr10	0.590817	2.00842	3.3994	0.0222153
Ptrf__chr11	1.18095	4.01256	3.39774	0.00725752
Rgcc__chr14	0.482366	1.63889	3.39761	0.0849046
Cldn5__chr16	0.448382	1.52035	3.39075	0.0749755
Vwa1__chr4	0.456988	1.53443	3.3577	0.0774528
Sptbn1__chr11	1.82235	6.07587	3.33409	0.00274574
Cd36__chr5	2.92511	9.66672	3.30474	0.000912892
Sox18__chr2	0.473781	1.55724	3.28683	0.0823601
Mmrn2__chr14	0.558643	1.82346	3.26409	0.108481
Ecscr__chr18	0.410482	1.32524	3.22849	0.0643842
Ctnnbip1__chr4	0.568837	1.83074	3.21839	0.111752
Jam2__chr16	0.66941	2.15279	3.21595	0.030523
Mcf2l__chr8	0.462503	1.48463	3.20998	0.079054
Slfn5__chr11	0.664193	2.1201	3.192	0.0299276
Tinagl1__chr4	0.503539	1.60514	3.18771	0.0912797
Id1__chr2	0.576231	1.83178	3.1789	0.11414
Notch4__chr17	0.443146	1.39425	3.14625	0.0734809
Hspg2__chr4	0.650073	2.04325	3.14311	0.0283474
Jup__chr11	0.558863	1.75449	3.13938	0.108552
Ctnnb1__chr9	1.32417	4.12732	3.11691	0.0114618
Sema7a__chr9	0.429979	1.33908	3.11429	0.0697661
Kdr__chr5	0.5194	1.60613	3.09228	0.0961439
Rasip1__chr7	0.589461	1.82205	3.09104	0.118445
Myo10__chr15	0.539666	1.66801	3.09083	0.102464
Nos3__chr5	0.390536	1.2041	3.0832	0.0590324
Ramp2__chr11	0.514412	1.57061	3.05322	0.0946063
Sema3f__chr9	0.39412	1.19582	3.03416	0.059982
[truncated: 19,412 more rows]

## Sheet: Cluster 6
CLUSTER 6
[truncated: 19,497 more rows]

## Sheet: Cluster 7
CLUSTER 7
[truncated: 19,497 more rows]

[truncated: 7 more sheets: Cluster 8, Cluster 9, Cluster 10, Cluster 11, Cluster 12, Cluster 13, Cluster 14]
