# Supplementary material for: Cardiomyocytes stimulate angiogenesis after ischemic injury in a ZEB2-dependent manner
Source: Nat Commun. 2021 Jan 4;12:84. doi: 10.1038/s41467-020-20361-3 (PMC7782784; doi:10.1038/s41467-020-20361-3)
Supplement: Supplementary file 5 — Supplementary Data 2 [file 41467_2020_20361_MOESM5_ESM.xlsx]

## Sheet: Sheet1
Supplementery Data 2
gene	baseMean	log2FoldChange	lfcSE	stat	pvalue	padj
Spp1__chr5	48.7128	9.96156	0.35996	27.6741	1.43196e-168	1.5713e-165
Col3a1__chr1	46.7893	9.51059	0.277061	34.3267	3.13521e-258	2.23619e-254
Arg1__chr10	25.5095	9.07033	0.408972	22.1784	5.5538e-109	9.43155e-107
Col1a2__chr6	36.9992	9.02092	0.291046	30.9948	6.33013e-211	2.25748e-207
Fn1__chr1	31.767	8.90464	0.34839	25.5594	4.31688e-144	2.28075e-141
Lyz1__chr10	47.4544	8.73612	0.327049	26.7119	3.42173e-157	2.32433e-154
Ctss__chr3	21.7756	8.67944	0.373297	23.2507	1.39801e-119	3.76276e-117
Tgfbi__chr13	18.7873	8.53153	0.421177	20.2564	3.11886e-91	2.4717e-89
Col1a1__chr11	26.5686	8.49199	0.331196	25.6404	5.40911e-145	2.96773e-142
Ftl1__chr7	115.741	8.39803	0.287116	29.2496	4.54486e-188	9.26177e-185
Wdr92__chr11	60.469	8.35309	0.287857	29.0182	3.87945e-185	6.91754e-182
C1qb__chr4	18.4656	8.35073	0.328213	25.443	8.44421e-143	4.30202e-140
Hmox1__chr8	15.0595	8.32112	0.333861	24.9239	4.09734e-137	1.88544e-134
Lgals3__chr14	15.0427	8.31099	0.358366	23.1914	5.56586e-119	1.4178e-116
Ccl6__chr11	15.9975	8.31008	0.367671	22.602	4.14558e-113	8.32912e-111
Pf4__chr5	15.5889	8.27866	0.331099	25.0036	5.58482e-138	2.65558e-135
Timp1__chrX	14.5924	8.26239	0.387689	21.3119	8.80169e-101	1.03765e-98
S100a6__chr3	15.8982	8.23393	0.295147	27.8978	2.83987e-171	3.6828e-168
Apoe__chr7	58.9	8.1653	0.304802	26.7888	4.36139e-158	3.27448e-155
Lcp1__chr14	15.0364	8.12574	0.345428	23.5237	2.33553e-122	7.34045e-120
Lgals1__chr15	26.775	8.04796	0.268233	30.0036	8.80901e-198	2.51321e-194
Thbs1__chr2	12.6132	8.03857	0.432146	18.6015	3.1242e-77	1.58601e-75
Pfn1__chr11	26.7537	8.0265	0.252334	31.8091	4.84728e-222	2.30488e-218
Tmsb10__chr6	18.7699	7.9417	0.321279	24.719	6.68519e-135	2.88983e-132
Fcer1g__chr1	12.2507	7.906	0.351415	22.4976	4.38277e-112	8.56441e-110
S100a11__chr3	19.1814	7.84938	0.270814	28.9844	1.03619e-184	1.64236e-181
Mt2__chr8	11.2521	7.76787	0.350237	22.1789	5.49045e-109	9.43155e-107
Laptm5__chr4	11.2041	7.74858	0.379042	20.4426	6.99762e-93	6.01332e-91
C1qc__chr4	12.1861	7.68545	0.344464	22.3113	2.86712e-110	5.11243e-108
Sh3bgrl3__chr4	12.1363	7.6128	0.293206	25.964	1.26402e-148	7.51299e-146
Ucp2__chr7	14.1479	7.60104	0.283662	26.7961	3.59053e-158	2.84549e-155
Tubb5__chr17	17.1243	7.58987	0.274405	27.6593	2.15644e-168	2.19726e-165
Ctsc__chr7	10.8642	7.55918	0.402061	18.8011	7.39788e-79	3.95246e-77
Arpc1b__chr5	16.0195	7.55049	0.356784	21.1626	2.1103e-99	2.35183e-97
Gpx1__chr9	19.4397	7.54766	0.316393	23.8553	8.9128e-126	2.95677e-123
Tuba1b__chr15	43.4307	7.48529	0.27705	27.0178	9.12717e-161	8.67993e-158
Cd14__chr18	9.35673	7.48298	0.380946	19.6432	6.61464e-86	4.49323e-84
Anxa2__chr9	12.8591	7.46554	0.324801	22.9849	6.59355e-117	1.51705e-114
S100a4__chr3	8.82777	7.46077	0.415556	17.9537	4.49062e-72	1.93531e-70
Tyrobp__chr7	8.6687	7.45327	0.459734	16.2121	4.13967e-59	1.12267e-57
C1qa__chr4	9.22853	7.43061	0.500517	14.8459	7.39995e-50	1.34988e-48
Mpeg1__chr19	8.37053	7.42143	0.459572	16.1486	1.16258e-58	3.05982e-57
Lgmn__chr12	10.8387	7.34008	0.342277	21.4448	5.10319e-102	6.61792e-100
Efhd2__chr4	10.5874	7.3322	0.342756	21.3919	1.58972e-101	1.98925e-99
Bgn__chrX	21.6966	7.32022	0.370481	19.7587	6.75627e-87	4.7712e-85
Cstb__chr10	8.523	7.30848	0.314347	23.2497	1.4322e-119	3.7834e-117
Vim__chr2	49.9113	7.25774	0.334808	21.6773	3.36155e-104	4.65559e-102
Mt1__chr8	18.0525	7.25373	0.252371	28.7424	1.1282e-181	1.60937e-178
Pgam1__chr19	16.2245	7.24004	0.270285	26.7867	4.62218e-158	3.29677e-155
Ccl9__chr11	8.00826	7.22276	0.384419	18.7888	9.32924e-79	4.96573e-77
Cotl1__chr8	7.47082	7.22254	0.429825	16.8035	2.30173e-63	7.21629e-62
Rps26__chr10	20.4932	7.22039	0.311781	23.1586	1.19215e-118	2.98351e-116
Emp3__chr7	7.57465	7.20297	0.340408	21.1599	2.23903e-99	2.45691e-97
Lrp1__chr10	8.45634	7.1652	0.353493	20.2697	2.38132e-91	1.89774e-89
Tagln2__chr1	13.3857	7.15915	0.335373	21.3468	4.17348e-101	5.08844e-99
H2afz__chr3	9.98077	7.15525	0.308277	23.2104	3.57273e-119	9.26637e-117
Cd52__chr4	7.07948	7.15298	0.481536	14.8545	6.50341e-50	1.1909e-48
Cd53__chr3	6.89059	7.13387	0.336641	21.1913	1.14808e-99	1.29979e-97
Plin2__chr4	8.31279	7.12437	0.318641	22.3586	9.96138e-111	1.84544e-108
Serpine1__chr5	7.1938	7.1243	0.362503	19.6531	5.44021e-86	3.71314e-84
Ier3__chr17	9.49628	7.10753	0.346831	20.4927	2.49911e-93	2.1871e-91
Dab2__chr15	8.56326	7.05508	0.361115	19.5369	5.33034e-85	3.52025e-83
Cxcl2__chr5	6.46748	7.05141	0.500193	14.0974	3.94064e-45	6.03146e-44
Tuba1c__chr15	8.21347	7.04751	0.354716	19.868	7.69887e-88	5.60328e-86
Grn__chr11	16.1881	7.04413	0.253244	27.8155	2.81374e-170	3.34483e-167
Tpm3__chr3	14.9197	7.03543	0.321575	21.878	4.20706e-106	6.18698e-104
Fcgr3__chr1	6.59843	7.01352	0.481825	14.5562	5.3374e-48	9.09654e-47
Csf1r__chr18	6.64261	7.01138	0.416345	16.8403	1.23583e-63	3.90889e-62
Fstl1__chr16	13.4474	7.0103	0.352282	19.8997	4.09269e-88	2.99396e-86
Ccl2__chr11	6.05142	6.9992	0.329022	21.2727	2.03218e-100	2.33782e-98
Ppia__chr11	12.8304	6.99474	0.375924	18.6068	2.83171e-77	1.44266e-75
Dynll1__chr5	10.0222	6.98719	0.346494	20.1654	1.97118e-90	1.53655e-88
S100a10__chr3	8.11348	6.97474	0.352206	19.803	2.80429e-87	2.00016e-85
Fxyd5__chr7	7.66751	6.97357	0.386972	18.0209	1.33618e-72	5.91946e-71
Itgb2__chr10	6.07858	6.95582	0.335768	20.7162	2.47661e-95	2.35525e-93
Cebpb__chr2	6.89516	6.93954	0.366351	18.9423	5.10812e-80	2.91469e-78
Rps28__chr17	28.7832	6.93891	0.324941	21.3544	3.55018e-101	4.3658e-99
Ctsz__chr2	7.45828	6.93157	0.356817	19.4261	4.64316e-84	3.03829e-82
Ctsb__chr14	61.072	6.93067	0.196289	35.3085	4.35532e-273	6.21286e-269
Txn1__chr4	12.9619	6.90842	0.29367	23.5244	2.29662e-122	7.34045e-120
Basp1__chr15	6.05737	6.90093	0.384904	17.929	7.00697e-72	2.99265e-70
Lilrb4__chr10	5.83253	6.89804	0.514226	13.4144	4.97872e-41	6.36964e-40
Actb__chr5	135.254	6.89725	0.296578	23.2561	1.23486e-119	3.38755e-117
Mgp__chr6	12.2565	6.89459	0.400848	17.2	2.65486e-66	9.25957e-65
Pabpc1__chr15	33.009	6.89125	0.315973	21.8096	1.88132e-105	2.6837e-103
Il1b__chr2	5.83207	6.89085	0.701003	9.82999	8.36304e-23	4.7191e-22
Rpl32__chr6	18.3693	6.86674	0.321802	21.3384	4.99472e-101	6.03811e-99
Uck2__chr1	6.45532	6.8624	0.556897	12.3226	6.84818e-35	6.69105e-34
Gm20362__chr6	8.24201	6.86013	0.360005	19.0556	5.89967e-81	3.53608e-79
Fbln2__chr6	8.91996	6.85801	0.422826	16.2195	3.67348e-59	9.98138e-58
Rpl29__chr9	15.8371	6.84981	0.292218	23.4408	1.64072e-121	4.87601e-119
Itgam__chr7	5.62694	6.84805	0.503506	13.6007	3.96427e-42	5.34501e-41
Cd44__chr2	6.64402	6.84201	0.346907	19.7229	1.37099e-86	9.49378e-85
Cyba__chr8	8.43157	6.83377	0.330601	20.6707	6.35263e-95	5.88443e-93
Clic1__chr17	8.48708	6.82755	0.316637	21.5627	4.0251e-103	5.52097e-101
Ifi30__chr8	5.44348	6.82144	0.487577	13.9905	1.78203e-44	2.67586e-43
Pdlim7__chr13	7.41522	6.81858	0.381447	17.8756	1.8276e-71	7.73611e-70
Ecm1__chr3	5.92472	6.80005	0.388461	17.5051	1.31e-68	5.02343e-67
Tubb6__chr18	5.61391	6.78973	0.349943	19.4024	7.36177e-84	4.70922e-82
Rbm3__chrX	9.66923	6.78637	0.299353	22.6701	8.83675e-114	1.88144e-111
Arpc5__chr1	8.85278	6.78341	0.327427	20.7173	2.41846e-95	2.31539e-93
Rpl7a__chr2	18.3825	6.7809	0.297028	22.8291	2.35703e-115	5.17277e-113
Myh9__chr15	7.07767	6.77085	0.323062	20.9584	1.57409e-97	1.62713e-95
Prelid1__chr13	6.51022	6.76681	0.348467	19.4188	5.35011e-84	3.4849e-82
Msn__chrX	9.03099	6.76597	0.362106	18.6851	6.55119e-78	3.41069e-76
Sdcbp__chr4	7.46832	6.75802	0.319975	21.1205	5.15734e-99	5.53154e-97
Ctsl__chr13	15.4059	6.74972	0.282348	23.9057	2.6741e-126	9.08239e-124
Alox5ap__chr5	5.30745	6.74392	0.460666	14.6395	1.57173e-48	2.74428e-47
Iqgap1__chr7	10.2029	6.74214	0.34179	19.726	1.29101e-86	9.0036e-85
Sirpa__chr2	6.01242	6.73067	0.373947	17.999	1.98381e-72	8.73426e-71
Smpx__chrX	16.3298	6.73016	0.436958	15.4023	1.57908e-53	3.35702e-52
F13a1__chr13	5.70196	6.72676	0.489114	13.7529	4.89063e-43	6.85987e-42
C3ar1__chr6	5.33086	6.71886	0.489284	13.732	6.52889e-43	9.07745e-42
Lyz2__chr10	5.26436	6.706	0.576593	11.6304	2.8878e-31	2.41609e-30
Ran__chr5	10.4569	6.70344	0.300167	22.3324	1.79138e-110	3.23469e-108
Eef1g__chr19	18.5628	6.70101	0.277577	24.1411	9.25346e-129	3.30001e-126
Capg__chr6	5.26979	6.69722	0.3944	16.9808	1.13977e-64	3.68681e-63
Arhgdia__chr11	11.47	6.69543	0.291074	23.0025	4.39773e-117	1.04556e-114
Ccr2__chr9	5.22368	6.69344	0.696478	9.61042	7.22552e-22	3.89687e-21
Msr1__chr8	4.94194	6.6734	0.538906	12.3832	3.22053e-35	3.1815e-34
Eif4a1__chr11	8.50958	6.66537	0.30651	21.746	7.53919e-105	1.06482e-102
Gnb2l1__chr11	24.4841	6.66443	0.286375	23.2717	8.58375e-120	2.44894e-117
Rpl36a__chrX	9.93645	6.66174	0.35279	18.883	1.57273e-79	8.7637e-78
Ms4a6d__chr19	4.8463	6.6602	0.50603	13.1617	1.45802e-39	1.73902e-38
Ckap4__chr10	8.17816	6.66011	0.270731	24.6005	1.24898e-133	5.09049e-131
Fau__chr19	23.0904	6.65257	0.293655	22.6544	1.26267e-113	2.61043e-111
Rps27l__chr9	7.15665	6.64907	0.349817	19.0073	1.48471e-80	8.68006e-79
Mafb__chr2	5.26329	6.64236	0.494055	13.4446	3.31283e-41	4.27283e-40
Cdkn1a__chr17	7.61381	6.63929	0.366497	18.1155	2.40268e-73	1.0812e-71
Mif__chr10	11.6682	6.61766	0.26843	24.6532	3.40428e-134	1.4283e-131
Gda__chr19	5.51329	6.60087	0.442257	14.9254	2.25287e-50	4.22859e-49
Rpl37a__chr1	20.2778	6.57699	0.341134	19.2798	7.94368e-83	4.99192e-81
Col5a2__chr1	4.89114	6.56422	0.437829	14.9927	8.19968e-51	1.56794e-49
Emp1__chr6	6.03811	6.55944	0.357348	18.3559	2.96136e-75	1.42235e-73
Rpl39__chrX	19.9791	6.54209	0.32676	20.0211	3.60973e-89	2.75363e-87
Fhl1__chrX	6.78547	6.54001	0.449778	14.5405	6.70682e-48	1.14032e-46
Actr3__chr1	7.27088	6.53791	0.346844	18.8497	2.95482e-79	1.62118e-77
Erdr1__chrY	8.22045	6.53401	0.321896	20.2985	1.32576e-91	1.08068e-89
Ppp1r14b__chr19	5.66695	6.52442	0.378132	17.2543	1.03824e-66	3.69339e-65
Rpl22__chr4	14.2027	6.52386	0.303528	21.4934	1.79394e-102	2.36949e-100
Prdx1__chr4	13.4326	6.51658	0.269471	24.1829	3.36904e-129	1.26472e-126
Rpl41__chr10	50.1472	6.5102	0.269875	24.123	1.4344e-128	4.99066e-126
Rpl27__chr11	17.3244	6.50667	0.295584	22.0129	2.16528e-107	3.32126e-105
Ppt1__chr4	8.28059	6.50452	0.282931	22.9897	5.90536e-117	1.38098e-114
Tspo__chr15	5.92646	6.50335	0.342192	19.005	1.5514e-80	9.03293e-79
Mmp14__chr14	4.81257	6.49903	0.416132	15.6177	5.51354e-55	1.2564e-53
Stab1__chr14	5.54358	6.49601	0.444251	14.6224	2.02258e-48	3.50999e-47
Actn1__chr12	6.62998	6.49087	0.343822	18.8786	1.71129e-79	9.49864e-78
Rpl3__chr15	25.217	6.48448	0.309643	20.9418	2.23039e-97	2.27261e-95
Adam8__chr7	4.28077	6.48347	0.562333	11.5296	9.35771e-31	7.6585e-30
Anxa1__chr19	4.56191	6.48198	0.402693	16.0966	2.69667e-58	6.93118e-57
Pmepa1__chr2	6.38742	6.47729	0.340639	19.0151	1.27774e-80	7.53181e-79
Wfdc17__chr11	4.55293	6.47697	0.429195	15.091	1.85656e-51	3.64289e-50
Dusp1__chr17	7.51528	6.47638	0.393365	16.4641	6.64858e-61	1.92768e-59
Il4ra__chr7	4.68822	6.47278	0.377756	17.1348	8.16369e-66	2.78447e-64
Rpl10a__chr17	19.502	6.47002	0.280006	23.1067	3.96215e-118	9.74484e-116
Eif5a__chr11	23.389	6.45188	0.239448	26.9449	6.55309e-160	5.84249e-157
Fosb__chr7	6.14862	6.44806	0.401243	16.0702	4.12788e-58	1.05339e-56
Col8a1__chr16	4.40157	6.44619	0.650423	9.91076	3.73773e-23	2.14735e-22
Lsp1__chr7	4.53817	6.44505	0.422705	15.2472	1.71924e-52	3.48862e-51
Rps18__chr17	24.9585	6.44119	0.300652	21.4241	7.96722e-102	1.01475e-99
Cybb__chrX	4.49895	6.4385	0.455267	14.1422	2.08522e-45	3.22622e-44
Eif4ebp1__chr8	5.54502	6.43414	0.373211	17.2399	1.33182e-66	4.71425e-65
Esd__chr14	6.8826	6.40798	0.311282	20.5858	3.67926e-94	3.28029e-92
Rpl14__chr9	13.5119	6.40783	0.310018	20.6692	6.55286e-95	5.99208e-93
Anxa5__chr3	8.34575	6.40467	0.356545	17.9632	3.78596e-72	1.65665e-70
Chi3l3__chr3	4.07003	6.40245	0.595172	10.7573	5.47475e-27	3.77281e-26
Hnrnpab__chr11	12.3264	6.39966	0.294375	21.7398	8.61977e-105	1.2055e-102
Rps19__chr7	21.7267	6.399	0.318309	20.1031	6.93603e-90	5.37731e-88
Cfp__chrX	4.18721	6.39635	0.519792	12.3056	8.45113e-35	8.22904e-34
Tpd52__chr3	5.21646	6.39185	0.401587	15.9165	4.87106e-57	1.18779e-55
Rps16__chr7	31.5365	6.39009	0.29128	21.9379	1.12952e-106	1.69607e-104
Litaf__chr16	4.78416	6.36048	0.356533	17.8398	3.47068e-71	1.45188e-69
Rpl36al__chr12	8.34533	6.35605	0.307339	20.6809	5.1446e-95	4.79658e-93
Actr2__chr11	6.44255	6.35374	0.318192	19.9682	1.04079e-88	7.81415e-87
Rpl38__chr11	24.8967	6.35091	0.277622	22.8761	8.0387e-116	1.79175e-113
Nmrk2__chr10	4.37198	6.34766	1.10906	5.72348	1.04362e-08	2.69307e-08
Nr4a1__chr15	4.4659	6.34429	0.447157	14.188	1.08642e-45	1.69559e-44
Jund__chr8	7.6015	6.33976	0.286689	22.1137	2.33505e-108	3.78517e-106
Mcl1__chr3	11.0087	6.33701	0.297303	21.315	8.23647e-101	9.7911e-99
Cfl1__chr19	45.9022	6.31651	0.298493	21.1613	2.17133e-99	2.40108e-97
Mrc1__chr2	4.08949	6.31611	0.540905	11.6769	1.67258e-31	1.41935e-30
Marcks__chr10	8.15436	6.31597	0.36672	17.2229	1.78947e-66	6.2874e-65
Rpl12__chr2	32.9033	6.30856	0.312601	20.1809	1.44238e-90	1.13052e-88
Zfp36__chr7	8.03733	6.30688	0.366906	17.1893	3.19109e-66	1.10756e-64
Coro1a__chr7	3.98084	6.30255	0.598432	10.5318	6.16551e-26	4.05678e-25
Rpl13a__chr7	37.9999	6.3019	0.267902	23.5231	2.36706e-122	7.34045e-120
Tgm2__chr2	9.37956	6.30015	0.32939	19.1267	1.51236e-81	9.18034e-80
Cd68__chr11	3.78734	6.28457	0.483338	13.0024	1.18486e-38	1.36748e-37
Fbn1__chr2	5.34081	6.28375	0.467646	13.437	3.67115e-41	4.72218e-40
Tuba1a__chr15	11.3346	6.28283	0.385235	16.3091	8.51001e-60	2.35719e-58
Cfl2__chr12	13.1001	6.26798	0.364164	17.212	2.1591e-66	7.56746e-65
Atp6v1a__chr16	4.99971	6.26697	0.373958	16.7585	4.91116e-63	1.51969e-61
Clta__chr4	5.64657	6.2651	0.353667	17.7147	3.23168e-70	1.30966e-68
Rps15__chr10	24.7731	6.26279	0.275629	22.7218	2.7274e-114	5.8949e-112
Mki67__chr7	3.77968	6.26184	0.564483	11.0931	1.35579e-28	1.00678e-27
Lmna__chr3	6.71589	6.25853	0.304897	20.5267	1.24362e-93	1.10188e-91
Npc2__chr12	5.98686	6.25822	0.326622	19.1605	7.91636e-82	4.84664e-80
Rps8__chr4	48.9721	6.25754	0.271618	23.038	1.9413e-117	4.69366e-115
Mfap5__chr6	4.0899	6.2517	0.380016	16.4512	8.22781e-61	2.35682e-59
Rtn4__chr11	8.19454	6.23638	0.295386	21.1126	6.08973e-99	6.48283e-97
Rhoc__chr3	6.22099	6.22985	0.375594	16.5867	8.70278e-62	2.57029e-60
Rps10__chr17	21.2601	6.22954	0.30177	20.6434	1.11969e-94	1.01091e-92
Cmip__chr8	4.90661	6.22885	0.351902	17.7005	4.15319e-70	1.66888e-68
Nme1__chr11	4.41764	6.22724	0.340417	18.293	9.41446e-75	4.40319e-73
Rap1b__chr10	8.44326	6.21441	0.357628	17.3768	1.23751e-67	4.53805e-66
Arpc4__chr6	5.05691	6.20642	0.326744	18.9948	1.88382e-80	1.08797e-78
Cdc42__chr4	18.7216	6.20228	0.281177	22.0582	7.96076e-108	1.26178e-105
Mtpn__chr6	6.16566	6.19806	0.31421	19.7258	1.29389e-86	9.0036e-85
Rpl18__chr7	23.6846	6.19806	0.27545	22.5016	4.00376e-112	7.93246e-110
Nfkbia__chr12	5.99227	6.19599	0.378095	16.3874	2.35383e-60	6.59675e-59
Plek__chr11	3.51795	6.19022	0.546568	11.3256	9.7979e-30	7.67951e-29
Tma7__chr9	7.98739	6.18667	0.299561	20.6525	9.27375e-95	8.42612e-93
Rpl35__chr2	24.1512	6.18584	0.296277	20.8786	8.38214e-97	8.18981e-95
Col15a1__chr4	5.54301	6.18387	0.370009	16.7128	1.05774e-62	3.23791e-61
Fos__chr12	22.7628	6.1838	0.441273	14.0136	1.28797e-44	1.94422e-43
Rpl6__chr5	28.4106	6.16779	0.275883	22.3565	1.0436e-110	1.90859e-108
Rnf149__chr1	3.96957	6.15951	0.396195	15.5467	1.67606e-54	3.75928e-53
Rpl36__chr17	19.0055	6.15894	0.303499	20.2931	1.47936e-91	1.19904e-89
Rpl23a__chr11	27.9668	6.15613	0.287727	21.3957	1.46386e-101	1.84796e-99
Col5a1__chr2	3.84419	6.14356	0.389097	15.7893	3.68874e-56	8.75538e-55
Akr1a1__chr4	9.95032	6.13337	0.291764	21.0217	4.15699e-98	4.39255e-96
Ywhaz__chr15	8.78922	6.12964	0.296546	20.6701	6.44279e-95	5.92945e-93
Pgk1__chrX	18.9404	6.12922	0.246328	24.8824	1.15439e-136	5.14608e-134
Maf__chr8	3.51828	6.12866	0.563892	10.8685	1.62861e-27	1.15011e-26
Calm2__chr17	8.26738	6.12619	0.322557	18.9925	1.96558e-80	1.13061e-78
Erh__chr12	4.69356	6.11603	0.327477	18.6762	7.7313e-78	4.01044e-76
S100a8__chr3	4.13291	6.11574	0.953689	6.41273	1.42941e-10	4.18011e-10
Rps2__chr17	52.9424	6.10753	0.269423	22.6689	9.07485e-114	1.90372e-111
Serp1__chr3	4.906	6.10699	0.316667	19.2852	7.14808e-83	4.51183e-81
Pitpna__chr11	5.85434	6.10579	0.344257	17.7362	2.20504e-70	8.98711e-69
Wdr1__chr5	6.14975	6.10414	0.292074	20.8993	5.43377e-97	5.42047e-95
P4hb__chr11	9.22981	6.10291	0.262336	23.2638	1.03255e-119	2.88811e-117
Banf1__chr19	5.79106	6.10081	0.283399	21.5273	8.64472e-103	1.17445e-100
C5ar1__chr7	3.34773	6.10043	0.450983	13.527	1.08405e-41	1.44523e-40
Btg1__chr10	4.5464	6.10006	0.415131	14.6943	7.01008e-49	1.23761e-47
Rps3__chr7	21.9763	6.09852	0.300655	20.2841	1.77624e-91	1.42349e-89
Sat1__chrX	4.39596	6.09075	0.34259	17.7786	1.03618e-70	4.28436e-69
Arhgdib__chr6	3.58733	6.08881	0.468771	12.9889	1.41512e-38	1.62796e-37
Ap2s1__chr7	4.75599	6.087	0.297416	20.4662	4.3056e-93	3.72239e-91
Hnrnpk__chr13	5.03529	6.08581	0.341883	17.8008	6.96092e-71	2.90344e-69
Sprr1a__chr3	3.44214	6.08342	0.894795	6.79868	1.05585e-11	3.30084e-11
Junb__chr8	10.0176	6.07438	0.40548	14.9807	9.81507e-51	1.86683e-49
Ccl7__chr11	3.1254	6.07252	0.415124	14.6282	1.85636e-48	3.22938e-47
Pgd__chr4	3.67088	6.06156	0.360999	16.7911	2.83588e-63	8.81348e-62
Top2a__chr11	3.21914	6.05619	0.568499	10.6529	1.6894e-26	1.14215e-25
Fabp5__chr3	5.16947	6.05479	0.410354	14.7551	2.85416e-49	5.10207e-48
Gng5__chr3	7.15039	6.05123	0.331492	18.2545	1.90513e-74	8.76669e-73
Eif2s2__chr2	7.13608	6.0507	0.302766	19.9848	7.47329e-89	5.64056e-87
Shfm1__chr6	7.30881	6.04677	0.320387	18.8733	1.89023e-79	1.04512e-77
Rpl28__chr7	25.7399	6.03895	0.276605	21.8324	1.14273e-105	1.64657e-103
Rrbp1__chr2	6.96185	6.0378	0.271472	22.241	1.37815e-109	2.39748e-107
Gas5__chr1	4.41277	6.0281	0.361034	16.6968	1.38343e-62	4.22582e-61
Rhoa__chr9	12.4389	6.02696	0.282842	21.3086	9.45337e-101	1.10535e-98
Zeb2__chr2	4.12819	6.0181	0.408734	14.7237	4.53905e-49	8.05342e-48
Rhog__chr7	3.68564	6.01688	0.33498	17.9619	3.8723e-72	1.6841e-70
Plp2__chrX	4.61023	6.01418	0.331903	18.1203	2.20453e-73	9.98337e-72
Arl6ip1__chr7	4.75182	6.00913	0.349642	17.1865	3.35137e-66	1.16037e-64
Hsp90aa1__chr12	13.5012	6.00848	0.267574	22.4554	1.13404e-111	2.15694e-109
Trf__chr9	3.39138	6.00805	0.611238	9.82932	8.4183e-23	4.7484e-22
Cdk2ap1__chr5	7.55052	6.00777	0.356768	16.8394	1.25407e-63	3.95783e-62
Hnrnpf__chr6	4.51602	6.0021	0.366973	16.3557	3.96011e-60	1.1055e-58
Klf6__chr13	7.38188	5.99916	0.380226	15.7779	4.41945e-56	1.0455e-54
Polr2l__chr7	6.99054	5.9939	0.32066	18.6924	5.7106e-78	2.99492e-76
Nras__chr3	4.84021	5.98593	0.363787	16.4545	7.78541e-61	2.24313e-59
Fcgr2b__chr1	3.0862	5.98585	0.525022	11.4011	4.12661e-30	3.28677e-29
Btf3__chr13	8.19677	5.98495	0.317801	18.8324	4.09682e-79	2.22209e-77
Tubb2a__chr13	5.13052	5.9768	0.38632	15.4711	5.43665e-54	1.19314e-52
Olfr1033__chr2	3.26465	5.97231	0.512228	11.6595	2.05336e-31	1.73115e-30
Serf2__chr2	16.7163	5.97033	0.27918	21.3852	1.83426e-101	2.27529e-99
Fyb__chr15	3.13435	5.97014	0.632987	9.4317	4.03483e-21	2.10292e-20
5430435G22Rik__chr1	3.04674	5.96022	0.497585	11.9783	4.61745e-33	4.16622e-32
Ncl__chr1	9.14099	5.95982	0.284841	20.9233	3.28262e-97	3.29765e-95
Hmgn2__chr4	6.8569	5.95947	0.294772	20.2172	6.90474e-91	5.44177e-89
Arf6__chr12	4.51396	5.9577	0.325081	18.3268	5.05767e-75	2.389e-73
Fam49b__chr15	3.36689	5.95759	0.427534	13.9348	3.89339e-44	5.76133e-43
Arf4__chr14	4.5427	5.95699	0.340981	17.4701	2.41968e-68	9.15565e-67
Serpinh1__chr7	10.7942	5.94975	0.244415	24.3429	6.90127e-131	2.66072e-128
Picalm__chr7	6.10549	5.94834	0.346729	17.1556	5.70674e-66	1.96161e-64
Sec61b__chr4	3.74626	5.94768	0.357209	16.6504	3.00342e-62	9.01975e-61
Hdgf__chr3	7.05551	5.9449	0.284488	20.8968	5.72333e-97	5.66968e-95
Rgs2__chr1	3.97675	5.93794	0.434195	13.6758	1.41724e-42	1.95333e-41
Prg4__chr1	3.7252	5.93606	0.474946	12.4984	7.61952e-36	7.73062e-35
Ywhah__chr5	5.74836	5.93451	0.319449	18.5774	4.90035e-77	2.47009e-75
Ube2s__chr7	4.20734	5.93092	0.348696	17.0089	7.05743e-65	2.31968e-63
Rpsa__chr9	65.3069	5.92733	0.241273	24.5669	2.85219e-133	1.13018e-130
Hn1__chr11	5.16665	5.92311	0.363429	16.2978	1.02279e-59	2.80578e-58
Ncf1__chr5	3.09399	5.92267	0.525926	11.2614	2.03477e-29	1.56305e-28
Tceb2__chr17	7.01999	5.92051	0.283627	20.8743	9.17355e-97	8.90208e-95
Gnb1__chr4	7.46477	5.91758	0.334325	17.7001	4.18743e-70	1.67321e-68
Ifitm2__chr7	6.08379	5.91569	0.334217	17.7001	4.18335e-70	1.67321e-68
Sfpi1__chr2	2.94343	5.91452	0.495055	11.9472	6.7149e-33	6.02062e-32
Cox6a1__chr5	8.52707	5.91432	0.315923	18.7208	3.3531e-78	1.77814e-76
Sfpq__chr4	4.87214	5.91259	0.340463	17.3663	1.48386e-67	5.42752e-66
Rps23__chr13	30.7752	5.91208	0.309325	19.1128	1.97442e-81	1.1884e-79
Rpl11__chr4	26.3312	5.90767	0.299089	19.7522	7.67389e-87	5.39251e-85
Rnase4__chr14	3.57491	5.90433	0.404913	14.5817	3.67125e-48	6.29451e-47
Nap1l1__chr10	4.66765	5.90051	0.304325	19.3888	9.58992e-84	6.08001e-82
Cd63__chr10	7.87655	5.89828	0.251652	23.4382	1.74323e-121	5.07493e-119
Tkt__chr14	3.34286	5.89605	0.358494	16.4467	8.85303e-61	2.52577e-59
Odc1__chr12	5.41334	5.89577	0.383495	15.3738	2.4542e-53	5.1484e-52
Pcna__chr2	3.86177	5.89545	0.358434	16.4478	8.69826e-61	2.48659e-59
Set__chr2	9.96783	5.89403	0.267707	22.0167	1.9926e-107	3.08961e-105
Sec61g__chr11	5.39204	5.89321	0.343946	17.1341	8.2571e-66	2.80446e-64
Emb__chr13	2.81966	5.89104	0.516566	11.4042	3.98213e-30	3.17702e-29
Rpl23__chr11	40.154	5.88938	0.269332	21.8666	5.40314e-106	7.86488e-104
Gm2a__chr11	3.11457	5.87713	0.476169	12.3425	5.34463e-35	5.23994e-34
Rps25__chr9	24.5458	5.87461	0.299644	19.6053	1.39391e-85	9.33525e-84
Hnrnpa0__chr13	4.78001	5.87037	0.302608	19.3992	7.83463e-84	4.98933e-82
Cltc__chr11	8.6207	5.8699	0.277756	21.1333	3.93228e-99	4.28199e-97
Rps29__chr12	34.1285	5.86697	0.294172	19.944	1.68855e-88	1.24804e-86
Rpl10__chrX	46.8105	5.86501	0.272669	21.5097	1.26448e-102	1.70168e-100
Rpl27a__chr7	32.4672	5.86479	0.280827	20.884	7.48962e-97	7.36824e-95
Fth1__chr19	101.93	5.86397	0.223996	26.1789	4.61931e-151	2.86498e-148
Sdc3__chr4	3.79254	5.86245	0.419459	13.9762	2.17828e-44	3.26057e-43
Pcbp1__chr6	7.77764	5.86219	0.288498	20.3197	8.61118e-92	7.10049e-90
Aprt__chr8	3.10206	5.86079	0.403786	14.5146	9.79612e-48	1.65179e-46
Arpc2__chr1	21.748	5.85976	0.272479	21.5053	1.38784e-102	1.85023e-100
Gusb__chr5	3.38378	5.85887	0.422325	13.8729	9.24908e-44	1.34493e-42
Csf2ra__chr19	3.31277	5.85587	0.434961	13.463	2.58357e-41	3.35042e-40
Marcksl1__chr4	3.1579	5.85307	0.396973	14.7443	3.35019e-49	5.98129e-48
Stmn1__chr4	3.13125	5.85253	0.467459	12.5199	5.81376e-36	5.91958e-35
Morf4l2__chrX	4.53252	5.8521	0.328916	17.792	8.14527e-71	3.38753e-69
Socs3__chr11	2.93229	5.84736	0.427941	13.664	1.66689e-42	2.28637e-41
Actg1__chr11	52.3575	5.84673	0.297887	19.6274	9.02817e-86	6.10364e-84
Ube2c__chr2	2.94056	5.84459	0.600114	9.73913	2.05298e-22	1.13555e-21
Rnh1__chr7	3.61472	5.84345	0.380217	15.3687	2.65375e-53	5.54257e-52
Ptms__chr6	12.5041	5.83861	0.286853	20.354	4.27861e-92	3.6115e-90
Rbp1__chr9	3.15859	5.83652	0.584462	9.98614	1.7528e-23	1.02139e-22
Taldo1__chr7	4.91118	5.83613	0.326849	17.8557	2.60785e-71	1.09415e-69
Tomm6__chr17	5.61252	5.82815	0.331221	17.5959	2.64705e-69	1.02331e-67
Gnb2__chr5	4.95752	5.82422	0.329731	17.6636	8.00038e-70	3.17015e-68
Hmgb1__chr5	10.1136	5.82413	0.285665	20.388	2.13882e-92	1.81609e-90
Nucks1__chr1	4.43832	5.82137	0.359325	16.2009	4.97185e-59	1.34071e-57
Tln1__chr4	7.86135	5.81434	0.324792	17.9017	1.14308e-71	4.86749e-70
Rps5__chr7	28.7098	5.81128	0.286492	20.2842	1.77176e-91	1.42349e-89
Rpl24__chr16	22.9397	5.80954	0.272929	21.2859	1.53307e-100	1.77799e-98
Snx5__chr2	4.08628	5.80877	0.341701	16.9996	8.27231e-65	2.70652e-63
Cct6a__chr5	5.49032	5.80558	0.313963	18.4913	2.42817e-76	1.18218e-74
Atxn10__chr15	4.55746	5.8016	0.373918	15.5157	2.71603e-54	6.02175e-53
Zyx__chr6	4.74171	5.79939	0.363496	15.9545	2.65273e-57	6.53562e-56
Acta2__chr19	8.0867	5.79869	0.306406	18.9249	7.11524e-80	4.01182e-78
Abca1__chr4	3.51658	5.7943	0.355688	16.2904	1.15489e-59	3.16209e-58
Npm1__chr11	14.6286	5.78772	0.289056	20.0228	3.48533e-89	2.67302e-87
Rbms1__chr2	5.01023	5.78518	0.3539	16.3469	4.57493e-60	1.27464e-58
Ms4a6c__chr19	3.24436	5.78445	0.427202	13.5403	9.03713e-42	1.2082e-40
Rac2__chr15	2.65056	5.78353	0.525748	11.0006	3.79703e-28	2.7621e-27
Mrpl33__chr5	5.00745	5.78238	0.315038	18.3545	3.03761e-75	1.45408e-73
Loxl2__chr14	2.94819	5.78213	0.425531	13.588	4.71486e-42	6.33907e-41
Ppp1cc__chr5	5.3491	5.77993	0.315646	18.3114	6.70972e-75	3.14849e-73
Fkbp1a__chr2	14.5851	5.77982	0.291143	19.8522	1.05497e-87	7.63913e-86
Arf1__chr11	8.35993	5.77718	0.311686	18.5352	1.07327e-76	5.33456e-75
Nsa2__chr13	5.44647	5.77324	0.33195	17.3919	9.50093e-68	3.50209e-66
H3f3b__chr11	13.5958	5.77193	0.347329	16.6181	5.15618e-62	1.53555e-60
Atp6v1g1__chr4	5.59331	5.76933	0.297302	19.4056	6.9151e-84	4.46353e-82
Rplp1__chr9	54.0382	5.76932	0.269172	21.4336	6.49661e-102	8.34902e-100
Slc16a3__chr11	2.57287	5.76913	0.477921	12.0713	1.4973e-33	1.37622e-32
Hnrnpu__chr1	5.78882	5.76801	0.287471	20.0647	1.50244e-89	1.1585e-87
Cd84__chr1	3.14224	5.76788	0.432317	13.3418	1.32242e-40	1.65332e-39
Ostf1__chr19	4.29476	5.76349	0.36698	15.7052	1.3941e-55	3.23363e-54
Anp32b__chr4	6.52171	5.76314	0.315061	18.2922	9.55618e-75	4.45487e-73
Emilin2__chr17	3.71714	5.76173	0.375465	15.3456	3.7914e-53	7.83831e-52
Cox8a__chr19	11.2061	5.76046	0.292849	19.6704	3.86488e-86	2.6506e-84
Slc3a2__chr19	3.50563	5.75926	0.335399	17.1714	4.34907e-66	1.50217e-64
Hspb1__chr5	25.3324	5.75878	0.310732	18.533	1.11958e-76	5.54543e-75
Ctgf__chr10	3.9853	5.7569	0.456441	12.6126	1.80034e-36	1.87049e-35
Loxl1__chr9	2.97837	5.75057	0.473728	12.139	6.56524e-34	6.15734e-33
Arpc3__chr5	3.34991	5.75038	0.356728	16.1198	1.85241e-58	4.82201e-57
Ptprc__chr1	2.82391	5.74788	0.525272	10.9427	7.20523e-28	5.15977e-27
Ube2i__chr17	4.32168	5.74328	0.338516	16.966	1.46483e-64	4.72756e-63
Ifitm3__chr7	10.1398	5.74181	0.359311	15.98	1.76005e-57	4.36645e-56
Rplp0__chr5	42.1675	5.7414	0.260724	22.021	1.81237e-107	2.84104e-105
Ube2d3__chr3	10.8658	5.73676	0.307374	18.6638	9.75933e-78	5.02588e-76
Atf4__chr15	4.4706	5.73644	0.310578	18.4702	3.58983e-76	1.7418e-74
Serbp1__chr6	11.6913	5.73402	0.258685	22.1661	7.30392e-109	1.22577e-106
Calm3__chr7	5.34236	5.73333	0.323724	17.7106	3.4759e-70	1.40464e-68
Gabarap__chr11	15.223	5.73325	0.258693	22.1624	7.92898e-109	1.3152e-106
Slc11a1__chr1	2.54954	5.72571	0.66304	8.63554	5.84483e-18	2.62934e-17
Ptbp3__chr4	4.59277	5.72152	0.408537	14.0049	1.45514e-44	2.18962e-43
Tpm4__chr8	9.64641	5.72058	0.356431	16.0496	5.75487e-58	1.45298e-56
Txndc17__chr11	3.70435	5.71817	0.408267	14.006	1.43334e-44	2.16138e-43
Apoc2__chr7	2.51855	5.71391	0.638623	8.94724	3.64485e-19	1.74009e-18
Rps11__chr7	27.4071	5.70974	0.272664	20.9406	2.28663e-97	2.31339e-95
Hint1__chr11	8.1574	5.7087	0.305846	18.6653	9.49269e-78	4.90628e-76
Cyfip1__chr7	4.13464	5.70545	0.348031	16.3935	2.12823e-60	5.97622e-59
Ptpn1__chr2	2.84651	5.70414	0.390836	14.5947	3.03562e-48	5.21724e-47
Eif3f__chr7	5.41488	5.70176	0.322644	17.672	6.89171e-70	2.73845e-68
Kdelr2__chr5	3.07725	5.7008	0.351676	16.2104	4.25794e-59	1.15037e-57
Phlda1__chr10	4.28146	5.70074	0.411209	13.8634	1.05618e-43	1.53425e-42
Gdi2__chr13	8.9876	5.69703	0.299181	19.0421	7.63835e-81	4.55904e-79
Ly86__chr13	2.53857	5.69097	0.650916	8.74302	2.26964e-18	1.04171e-17
Abracl__chr10	3.43848	5.68976	0.372022	15.2941	8.36659e-53	1.71233e-51
Rpl35a__chr16	27.3969	5.68896	0.301216	18.8867	1.46869e-79	8.21605e-78
Pdpn__chr4	2.43359	5.68816	0.426782	13.328	1.59046e-40	1.98148e-39
Rpl8__chr15	22.0672	5.6873	0.304015	18.7073	4.31905e-78	2.2819e-76
Calr__chr8	12.0117	5.68545	0.22064	25.768	2.02685e-146	1.15652e-143
Tcf25__chr8	5.72437	5.68441	0.300295	18.9295	6.52375e-80	3.69291e-78
Ptges3__chr10	4.80831	5.68007	0.30586	18.5708	5.53716e-77	2.7715e-75
Csf2rb__chr15	2.71071	5.6795	0.524233	10.8339	2.37757e-27	1.66418e-26
Cndp2__chr18	3.01844	5.67784	0.373405	15.2056	3.24761e-52	6.54338e-51
Capza2__chr6	4.40141	5.6755	0.3579	15.8578	1.24242e-56	2.98873e-55
Rpl15__chr14	28.4003	5.67496	0.283832	19.9941	6.20163e-89	4.70566e-87
Snrpe__chr1	3.56673	5.67471	0.350615	16.185	6.43209e-59	1.72794e-57
Dbi__chr1	5.19216	5.67134	0.285748	19.8473	1.16195e-87	8.32923e-86
Mrpl52__chr14	3.86222	5.67092	0.350556	16.1769	7.33525e-59	1.96318e-57
Ccdc80__chr16	3.51389	5.67043	0.459175	12.3492	4.92198e-35	4.83554e-34
Ctsh__chr9	3.92922	5.66682	0.441594	12.8327	1.0761e-37	1.18081e-36
Cct2__chr10	5.20218	5.66592	0.320307	17.689	5.09449e-70	2.02997e-68
Lasp1__chr11	3.2081	5.66429	0.362162	15.6402	3.87271e-55	8.86745e-54
Igfbp4__chr11	3.04036	5.66296	0.392697	14.4207	3.83424e-47	6.28684e-46
Srgn__chr10	18.5622	5.66071	0.373884	15.1403	8.77987e-52	1.7371e-50
Eef1b2__chr1	19.141	5.66051	0.27326	20.7148	2.54999e-95	2.40898e-93
AA467197__chr2	2.55885	5.65797	0.663893	8.52241	1.56272e-17	6.87608e-17
Dynlrb1__chr2	5.44979	5.65785	0.295056	19.1755	5.92627e-82	3.64389e-80
Celf2__chr2	5.7778	5.65517	0.333015	16.9817	1.1213e-64	3.63532e-63
Gpnmb__chr6	2.42704	5.65482	0.53607	10.5487	5.15189e-26	3.40082e-25
Ptpn6__chr6	2.47564	5.6523	0.505247	11.1872	4.71021e-29	3.55697e-28
B4galt1__chr4	3.98443	5.65023	0.297361	19.0013	1.66428e-80	9.65082e-79
Ptbp1__chr10	2.94553	5.64921	0.408344	13.8344	1.57994e-43	2.27196e-42
Tmsb4x__chrX	92.2557	5.64306	0.331805	17.0071	7.27063e-65	2.38426e-63
Psmd8__chr7	3.83751	5.64159	0.30779	18.3294	4.8245e-75	2.28643e-73
Hcls1__chr16	2.5929	5.64033	0.494392	11.4086	3.78755e-30	3.02516e-29
Snrpg__chr6	3.19396	5.63816	0.354611	15.8996	6.38176e-57	1.55087e-55
Coro1b__chr19	3.1616	5.63411	0.369635	15.2424	1.85047e-52	3.74958e-51
Myl12a__chr17	23.819	5.63356	0.266672	21.1255	4.64143e-99	5.01591e-97
Rpl5__chr5	33.4451	5.62887	0.274537	20.5032	2.01761e-93	1.77662e-91
Mapre1__chr2	5.59908	5.62847	0.322644	17.4448	3.76961e-68	1.41138e-66
Baz1a__chr12	2.99013	5.62776	0.386706	14.5531	5.58543e-48	9.50789e-47
Ccr5__chr9	2.41775	5.62712	0.701242	8.02451	1.01936e-15	4.03137e-15
Srsf2__chr11	7.14353	5.62679	0.313244	17.9629	3.80138e-72	1.65831e-70
Ranbp1__chr16	2.77298	5.62232	0.384255	14.6317	1.76238e-48	3.07339e-47
Rps21__chr2	23.0471	5.6223	0.321203	17.5039	1.33778e-68	5.11621e-67
Atf3__chr1	2.72439	5.61761	0.508981	11.037	2.5345e-28	1.85219e-27
Ctsa__chr2	5.53608	5.61716	0.276429	20.3204	8.48141e-92	7.03414e-90
Ost4__chr5	3.1584	5.61552	0.362703	15.4824	4.56144e-54	1.00415e-52
Coro1c__chr5	3.54188	5.61551	0.363074	15.4666	5.83416e-54	1.278e-52
Cyth4__chr15	2.42975	5.61529	0.563012	9.97366	1.98765e-23	1.15306e-22
Kpnb1__chr11	4.57752	5.61528	0.341245	16.4553	7.68635e-61	2.21955e-59
Hexa__chr9	3.32975	5.61525	0.373796	15.0222	5.25006e-51	1.01206e-49
Kctd12__chr14	3.4446	5.61513	0.460147	12.2029	2.99893e-34	2.85961e-33
Hnrnpa3__chr2	9.13665	5.60904	0.343206	16.3431	4.87351e-60	1.35518e-58
Mfsd1__chr3	2.93205	5.60609	0.394625	14.2061	8.3967e-46	1.31337e-44
Rps13__chr7	26.6234	5.60553	0.26755	20.9513	1.82474e-97	1.87265e-95
Smc4__chr3	2.97839	5.60067	0.466932	11.9946	3.79164e-33	3.43196e-32
Capzb__chr4	10.5437	5.59422	0.260481	21.4765	2.58184e-102	3.37889e-100
Snrpf__chr10	3.11056	5.59324	0.372667	15.0087	6.44054e-51	1.2382e-49
Atox1__chr11	3.52708	5.58971	0.320573	17.4366	4.35021e-68	1.6245e-66
Rbpj__chr5	2.99572	5.5896	0.368634	15.163	6.21513e-52	1.2348e-50
Hprt__chrX	3.7931	5.58771	0.348741	16.0225	8.89761e-58	2.23066e-56
Ybx3__chr6	7.95301	5.58448	0.327465	17.0537	3.28198e-65	1.09132e-63
Shisa5__chr9	3.94219	5.58236	0.336816	16.5739	1.07601e-61	3.16479e-60
Stat3__chr11	4.57644	5.58121	0.334926	16.664	2.3934e-62	7.2488e-61
Fcgr1__chr3	2.25969	5.58057	0.748354	7.45713	8.84265e-14	3.13626e-13
Ap2m1__chr16	6.95906	5.58037	0.269523	20.7046	3.14794e-95	2.9543e-93
Pla2g7__chr17	2.41525	5.5749	0.547058	10.1907	2.18187e-24	1.33638e-23
Btg2__chr1	6.56633	5.57342	0.424908	13.1168	2.64012e-39	3.1125e-38
Vasp__chr7	3.31828	5.57328	0.386576	14.417	4.04292e-47	6.61378e-46
Crip1__chr12	6.76455	5.57245	0.38994	14.2905	2.50698e-46	4.00023e-45
Pnp__chr14	3.09359	5.56912	0.397231	14.0199	1.17827e-44	1.78051e-43
Sept2__chr1	4.67053	5.56767	0.326757	17.0392	4.20632e-65	1.39218e-63
Kpna2__chr11	2.76655	5.56723	0.453856	12.2665	1.3703e-34	1.32524e-33
Tram1__chr1	3.69573	5.56638	0.313507	17.7552	1.57062e-70	6.47539e-69
Rpl9__chr5	25.1826	5.56531	0.312804	17.7917	8.20208e-71	3.40124e-69
Mnf1__chr17	5.10116	5.56464	0.33056	16.834	1.37513e-63	4.32074e-62
Ehd4__chr2	11.7834	5.56392	0.295511	18.8281	4.44373e-79	2.38308e-77
Capza1__chr3	2.90465	5.56349	0.361364	15.3958	1.74609e-53	3.69554e-52
Polr1d__chr5	4.17365	5.56241	0.340856	16.3189	7.24071e-60	2.00951e-58
Gorasp2__chr2	3.30485	5.5611	0.325977	17.0598	2.95663e-65	9.87738e-64
Rps12__chr10	50.0772	5.55383	0.31308	17.7393	2.08415e-70	8.54322e-69
Cct8__chr16	4.64593	5.55381	0.309243	17.9594	4.05379e-72	1.75767e-70
Calm1__chr12	32.2648	5.54936	0.301013	18.4357	6.79918e-76	3.2767e-74
Snx3__chr10	8.66251	5.54486	0.321785	17.2316	1.53825e-66	5.43149e-65
D8Ertd738e__chr8	4.13755	5.54234	0.306654	18.0736	5.14685e-73	2.29437e-71
Unc93b1__chr19	2.39786	5.54069	0.482454	11.4844	1.58042e-30	1.2824e-29
Eef1a1__chr9	57.325	5.53892	0.339844	16.2984	1.01275e-59	2.78359e-58
Snrpb__chr2	4.36429	5.53629	0.318072	17.4058	7.4604e-68	2.76423e-66
Dpysl3__chr18	2.86108	5.53483	0.510488	10.8422	2.17084e-27	1.52247e-26
Rab1__chr11	6.69208	5.53382	0.290688	19.0369	8.43185e-81	5.01168e-79
Emilin1__chr5	2.16621	5.53151	0.533144	10.3753	3.21362e-25	2.04197e-24
Ccr1__chr9	2.47772	5.52878	0.650561	8.49849	1.92075e-17	8.4022e-17
Hexb__chr13	2.36525	5.5282	0.462455	11.954	6.18547e-33	5.55991e-32
Hnrnpc__chr14	5.2366	5.52719	0.284122	19.4536	2.7177e-84	1.78654e-82
Col6a2__chr10	3.15559	5.52635	0.347844	15.8874	7.74628e-57	1.87289e-55
Lamp2__chrX	4.64685	5.52622	0.303217	18.2253	3.25063e-74	1.48623e-72
Nedd8__chr14	3.55917	5.5258	0.331513	16.6684	2.22342e-62	6.7627e-61
Cdk4__chr10	3.0594	5.52547	0.36551	15.1172	1.24817e-51	2.45927e-50
Wbp5__chrX	2.88387	5.52163	0.393044	14.0484	7.88288e-45	1.19882e-43
Sepw1__chr7	7.37078	5.52024	0.311202	17.7384	2.11732e-70	8.65432e-69
Tubb4b__chr2	8.09532	5.51453	0.307359	17.9417	5.57719e-72	2.39634e-70
Anxa3__chr5	2.97384	5.50804	0.394261	13.9706	2.35752e-44	3.52147e-43
Msrb1__chr17	4.78772	5.50753	0.322173	17.095	1.61803e-65	5.46947e-64
Ube2n__chr10	3.58003	5.50709	0.337719	16.3067	8.84496e-60	2.44049e-58
Rac1__chr5	9.19372	5.50618	0.319663	17.225	1.72502e-66	6.07591e-65
Sec13__chr6	3.37152	5.50585	0.352684	15.6113	6.09813e-55	1.38519e-53
Rps7__chr12	26.7633	5.50518	0.279541	19.6937	2.44342e-86	1.68384e-84
Pim1__chr17	2.80709	5.50149	0.384084	14.3237	1.55696e-46	2.50395e-45
Hmgb2__chr8	2.36048	5.5004	0.495736	11.0954	1.32055e-28	9.81128e-28
Srsf3__chr17	4.99707	5.49934	0.318428	17.2703	7.87616e-67	2.81588e-65
G3bp1__chr11	3.32486	5.49605	0.319321	17.2117	2.17087e-66	7.59007e-65
Copa__chr1	4.01807	5.49434	0.3115	17.6384	1.25047e-69	4.91404e-68
Fam129b__chr2	3.4736	5.49331	0.33116	16.5881	8.50005e-62	2.51563e-60
Fscn1__chr5	3.29223	5.49282	0.433063	12.6837	7.28474e-37	7.72616e-36
Lamtor1__chr7	3.72857	5.4885	0.340921	16.099	2.591e-58	6.67159e-57
Trem2__chr17	2.12247	5.48722	0.613895	8.93838	3.94931e-19	1.88103e-18
Id2__chr12	2.74532	5.48659	0.439012	12.4976	7.6948e-36	7.7959e-35
Rps9__chr7	38.9491	5.48566	0.250612	21.889	3.30731e-106	4.91445e-104
Naca__chr10	9.59163	5.4848	0.288521	19.0101	1.40781e-80	8.26437e-79
2810417H13Rik__chr9	2.17119	5.47771	0.549833	9.9625	2.22395e-23	1.28753e-22
Wdr26__chr1	5.08625	5.47694	0.293893	18.6359	1.64492e-77	8.44057e-76
Cd9__chr6	3.00479	5.4764	0.394317	13.8883	7.45589e-44	1.09197e-42
Sgpl1__chr10	2.4354	5.46996	0.403412	13.5592	6.98476e-42	9.36444e-41
Pdap1__chr5	3.50287	5.46865	0.329456	16.599	7.08578e-62	2.1058e-60
Rras2__chr7	3.88062	5.46778	0.45198	12.0974	1.09021e-33	1.00986e-32
Ninj1__chr13	3.30451	5.46696	0.394037	13.8742	9.07767e-44	1.32136e-42
Man2a1__chr17	2.76119	5.46667	0.370932	14.7377	3.69254e-49	6.58426e-48
Tcirg1__chr19	2.52634	5.4656	0.405979	13.4628	2.59037e-41	3.35315e-40
Ncf2__chr1	2.25456	5.4653	0.531258	10.2875	8.02566e-25	5.01692e-24
Rexo2__chr9	3.1957	5.46436	0.353765	15.4463	7.98845e-54	1.72921e-52
U2af2__chr7	4.18144	5.46373	0.296182	18.4472	5.48826e-76	2.6539e-74
Ywhaq__chr12	4.82369	5.46202	0.370919	14.7256	4.41322e-49	7.83993e-48
Pkm__chr9	34.3183	5.46195	0.186657	29.2619	3.16751e-188	7.53077e-185
Sec61a1__chr6	2.48093	5.45656	0.371734	14.6787	8.8283e-49	1.55476e-47
Cbx3__chr6	3.3119	5.45267	0.331849	16.4312	1.14351e-60	3.24299e-59
Tbca__chr13	3.51328	5.45191	0.324922	16.7791	3.46832e-63	1.07556e-61
Rpl4__chr9	46.698	5.45157	0.232293	23.4685	8.55984e-122	2.598e-119
Rbx1__chr15	4.64742	5.44933	0.354498	15.372	2.52368e-53	5.28639e-52
Sdc4__chr2	2.26095	5.44687	0.398576	13.6658	1.62442e-42	2.23025e-41
Drap1__chr19	8.06768	5.44652	0.28922	18.8317	4.14929e-79	2.24203e-77
Bri3__chr5	8.91429	5.44162	0.298007	18.2601	1.72063e-74	7.96908e-73
Arl4c__chr1	2.22748	5.43737	0.451014	12.0559	1.80599e-33	1.65355e-32
Hmgn1__chr16	3.45318	5.43595	0.354212	15.3466	3.73207e-53	7.72685e-52
Cxcr4__chr1	2.34182	5.43457	0.466007	11.662	1.99304e-31	1.68129e-30
Zfp36l2__chr17	2.94601	5.434	0.421261	12.8994	4.53829e-38	5.08553e-37
Dcn__chr10	11.7344	5.42935	0.398068	13.6393	2.33927e-42	3.19021e-41
Krtcap2__chr3	5.31331	5.42884	0.261592	20.753	1.15098e-95	1.10938e-93
Sumo2__chr11	5.00168	5.42828	0.362274	14.9839	9.35287e-51	1.78367e-49
Nckap1l__chr15	2.03415	5.42651	0.505986	10.7246	7.79989e-27	5.33391e-26
Ube2m__chr7	4.63289	5.42612	0.312604	17.3578	1.72238e-67	6.28382e-66
Rps27a__chr11	32.7882	5.42543	0.288036	18.836	3.83052e-79	2.08559e-77
Clec4d__chr6	2.1598	5.42492	0.568613	9.54062	1.41979e-21	7.56565e-21
Rpl13__chr8	49.7115	5.42291	0.26321	20.603	2.57946e-94	2.31421e-92
Arrb2__chr11	2.14685	5.42205	0.528882	10.2519	1.16026e-24	7.20552e-24
Olfml3__chr3	2.04296	5.42204	0.533818	10.1571	3.08108e-24	1.86869e-23
Gpx3__chr11	6.12602	5.41899	0.289963	18.6886	6.13513e-78	3.20577e-76
Mapkapk2__chr1	5.76123	5.41828	0.287773	18.8283	4.42758e-79	2.38308e-77
Sf1__chr19	4.2464	5.41827	0.291677	18.5763	4.99945e-77	2.51117e-75
Sub1__chr15	4.1005	5.41692	0.334911	16.1742	7.67087e-59	2.04533e-57
Brd2__chr17	3.64771	5.41342	0.341931	15.8319	1.87483e-56	4.49488e-55
Tomm7__chr5	3.71487	5.4108	0.342737	15.787	3.82064e-56	9.0534e-55
Nfic__chr10	7.44447	5.40886	0.287105	18.8393	3.59579e-79	1.96528e-77
Ctsd__chr7	28.0101	5.40832	0.200825	26.9305	9.64675e-160	8.09475e-157
Pid1__chr1	2.12803	5.40818	0.515091	10.4995	8.68697e-26	5.68178e-25
Fosl2__chr5	2.48713	5.4011	0.424978	12.7091	5.26092e-37	5.6173e-36
Rpl19__chr11	31.5413	5.4004	0.272047	19.851	1.08085e-87	7.78705e-86
Cnn2__chr10	5.29996	5.40035	0.382812	14.107	3.43764e-45	5.27857e-44
Ptgis__chr2	2.02669	5.39937	0.636445	8.48364	2.18249e-17	9.50632e-17
Erp29__chr5	3.79454	5.39622	0.32224	16.746	6.06036e-63	1.86719e-61
Akt1__chr12	4.94234	5.39607	0.291328	18.5223	1.36463e-76	6.71255e-75
Ssr4__chrX	2.8617	5.39582	0.349182	15.4528	7.22815e-54	1.57419e-52
Apbb1ip__chr2	1.99853	5.39555	0.479497	11.2525	2.25059e-29	1.72513e-28
Naa50__chr16	4.0233	5.3953	0.343734	15.6961	1.60733e-55	3.71614e-54
Pabpn1__chr14	4.36117	5.39441	0.310174	17.3916	9.56079e-68	3.51507e-66
Brk1__chr6	2.83574	5.39269	0.350393	15.3904	1.89825e-53	4.01163e-52
Pld4__chr12	1.94923	5.3922	0.633424	8.51279	1.69801e-17	7.45524e-17
Dync1i2__chr2	3.795	5.39084	0.326854	16.4931	4.11234e-61	1.19964e-59
Rgs1__chr1	1.963	5.3888	0.802156	6.7179	1.84367e-11	5.68647e-11
Prkcd__chr14	2.27326	5.38603	0.456708	11.7932	4.23366e-32	3.67803e-31
Psma3__chr12	4.75586	5.38576	0.311497	17.2899	5.60442e-67	2.01378e-65
Dazap2__chr15	5.68307	5.38341	0.310414	17.3427	2.24139e-67	8.11507e-66
Taf10__chr7	3.02729	5.38262	0.350096	15.3747	2.42045e-53	5.08509e-52
Ssr1__chr13	4.01289	5.38224	0.307886	17.4813	1.98856e-68	7.54437e-67
Snx1__chr9	2.36429	5.37919	0.398293	13.5056	1.44909e-41	1.91401e-40
M6pr__chr6	3.2868	5.37661	0.342477	15.6992	1.53172e-55	3.54707e-54
Tceb1__chr1	3.83596	5.37582	0.334401	16.0759	3.76239e-58	9.63563e-57
Creb3l1__chr2	2.15797	5.3737	0.454292	11.8288	2.77227e-32	2.42319e-31
Rps20__chr4	29.6739	5.37184	0.304729	17.6282	1.4955e-69	5.82875e-68
Prdx6__chr1	5.86903	5.37175	0.296533	18.1152	2.41747e-73	1.08444e-71
Trib1__chr15	2.2729	5.37047	0.433077	12.4007	2.58956e-35	2.57063e-34
Sod3__chr5	3.00979	5.37033	0.408302	13.1528	1.63933e-39	1.95363e-38
Pdia3__chr2	3.73727	5.36929	0.290305	18.4953	2.25099e-76	1.09967e-74
Tmed2__chr5	6.82278	5.36809	0.252961	21.221	6.11038e-100	6.97317e-98
H2afy__chr13	3.13481	5.36634	0.347538	15.441	8.66789e-54	1.87345e-52
Psmb1__chr17	6.20911	5.36602	0.293927	18.2563	1.84448e-74	8.51507e-73
Pdcd6ip__chr9	3.78675	5.3647	0.355155	15.1052	1.49629e-51	2.94408e-50
Rps6__chr4	35.4492	5.3629	0.280535	19.1167	1.83413e-81	1.10864e-79
Hif1a__chr12	3.12916	5.36288	0.349336	15.3516	3.45323e-53	7.15993e-52
Rab2a__chr4	5.28643	5.36112	0.295966	18.114	2.4726e-73	1.10569e-71
Ube2v1__chr2	4.52492	5.35929	0.303812	17.6401	1.21171e-69	4.77487e-68
Nr4a2__chr2	1.98265	5.35924	0.589216	9.09555	9.41125e-20	4.62139e-19
Glrx__chr13	2.83312	5.35669	0.381482	14.0418	8.64817e-45	1.31241e-43
Man2b1__chr8	3.63219	5.35669	0.339787	15.7648	5.43013e-56	1.27823e-54
Rab8b__chr9	2.08514	5.35621	0.442543	12.1033	1.01502e-33	9.42656e-33
Cct5__chr15	3.7785	5.35612	0.343772	15.5805	9.88344e-55	2.22729e-53
Lilrb3__chr7	2.09947	5.35529	0.559566	9.57043	1.06466e-21	5.70099e-21
Tnc__chr4	1.9278	5.35486	0.630368	8.49482	1.98246e-17	8.66151e-17
Hnrnpm__chr17	3.87012	5.35314	0.298085	17.9584	4.12222e-72	1.78192e-70
Fam96a__chr9	2.83486	5.34996	0.396928	13.4784	2.09601e-41	2.73806e-40
Capns1__chr7	14.8967	5.34951	0.236503	22.6192	2.80678e-113	5.71982e-111
Tax1bp3__chr11	3.37394	5.34748	0.429056	12.4634	1.18275e-35	1.18816e-34
Eid1__chr2	3.33829	5.34703	0.338623	15.7905	3.61667e-56	8.59864e-55
Bzw1__chr1	2.76385	5.34337	0.339194	15.7531	6.53699e-56	1.53372e-54
Mmp9__chr2	2.14728	5.34301	0.823232	6.49029	8.56737e-11	2.53924e-10
Rps17__chr7	3.02091	5.34102	0.371628	14.372	7.75833e-47	1.26051e-45
Arpp19__chr9	3.16453	5.33984	0.346345	15.4177	1.24517e-53	2.67104e-52
Rcn3__chr7	2.17603	5.33913	0.514406	10.3792	3.08262e-25	1.96135e-24
Atp6v1b2__chr8	3.86901	5.3382	0.316587	16.8617	8.60368e-64	2.73954e-62
Esyt1__chr10	2.37311	5.33799	0.401807	13.285	2.82977e-40	3.47389e-39
Rpl18a__chr8	43.009	5.33727	0.261096	20.4418	7.10296e-93	6.06729e-91
Lrrc33__chr16	2.12703	5.33661	0.494854	10.7842	4.08736e-27	2.83315e-26
Rps14__chr18	23.2489	5.33613	0.323854	16.4769	5.37279e-61	1.56095e-59
Aebp1__chr11	1.96341	5.33538	0.573474	9.30361	1.35751e-20	6.89634e-20
Tra2b__chr16	2.59326	5.3347	0.358692	14.8726	4.96274e-50	9.15828e-49
Gsto1__chr19	3.41184	5.33457	0.388019	13.7482	5.21889e-43	7.29877e-42
Glud1__chr14	4.06588	5.33364	0.311277	17.1347	8.17872e-66	2.78447e-64
Trim28__chr7	2.90526	5.33265	0.332181	16.0535	5.40535e-58	1.36958e-56
Psmb5__chr14	4.49344	5.3309	0.291102	18.3128	6.54396e-75	3.08084e-73
Hypk__chr2	3.37556	5.33035	0.345795	15.4148	1.30215e-53	2.78905e-52
Tardbp__chr4	4.1684	5.33018	0.351071	15.1826	4.6107e-52	9.21172e-51
Pdia6__chr12	6.44509	5.3283	0.237653	22.4205	2.48371e-111	4.66186e-109
Ubl5__chr9	3.67638	5.32633	0.333102	15.9901	1.49825e-57	3.72343e-56
Akap2__chr4	6.87208	5.32561	0.386706	13.7717	3.76983e-43	5.31916e-42
Vmp1__chr11	3.00989	5.32516	0.329323	16.17	8.20466e-59	2.18357e-57
Rab6a__chr7	4.30547	5.32369	0.316946	16.7968	2.57404e-63	8.01752e-62
Ddb1__chr19	3.77705	5.32161	0.322361	16.5082	3.20172e-61	9.35912e-60
Dap__chr15	2.32034	5.32015	0.439673	12.1002	1.05316e-33	9.76806e-33
Tm9sf3__chr19	4.26991	5.31546	0.329478	16.1329	1.49706e-58	3.91846e-57
Caprin1__chr2	4.08314	5.31524	0.307916	17.262	9.09121e-67	3.24215e-65
Pcolce__chr5	2.33833	5.3152	0.499007	10.6516	1.71466e-26	1.15867e-25
Csrp2__chr10	2.21876	5.31442	0.521707	10.1866	2.27564e-24	1.39203e-23
Psma4__chr9	4.90685	5.31411	0.325954	16.3033	9.35712e-60	2.57682e-58
Sf3b1__chr1	5.06866	5.31015	0.318639	16.6651	2.3504e-62	7.13373e-61
Rpl7__chr1	26.0083	5.30828	0.281522	18.8557	2.63875e-79	1.45335e-77
Wsb2__chr5	3.89054	5.30727	0.34764	15.2666	1.27707e-52	2.60248e-51
Grb2__chr11	3.54935	5.30459	0.329444	16.1016	2.48532e-58	6.41106e-57
Snx2__chr18	2.26318	5.30436	0.400348	13.2494	4.54861e-40	5.52221e-39
Txnl1__chr18	3.57132	5.3009	0.364595	14.5391	6.84501e-48	1.16105e-46
Rad23b__chr4	4.18074	5.2984	0.310775	17.049	3.55684e-65	1.17996e-63
Sri__chr5	3.44764	5.29783	0.34632	15.2975	7.94138e-53	1.62764e-51
Rps3a1__chr3	35.7192	5.29752	0.265416	19.9593	1.24443e-88	9.29413e-87
Ywhag__chr5	6.10511	5.29664	0.275291	19.2401	1.70729e-82	1.06818e-80
Ube2l3__chr16	5.41747	5.29431	0.288833	18.33	4.76963e-75	2.26796e-73
Myeov2__chr1	3.25599	5.29382	0.352247	15.0287	4.76169e-51	9.19155e-50
Manf__chr9	3.54044	5.29287	0.318223	16.6326	4.04663e-62	1.21017e-60
Ywhab__chr2	12.1059	5.2909	0.2951	17.9291	6.98426e-72	2.99191e-70
Psmb3__chr11	3.49651	5.29053	0.313989	16.8494	1.05992e-63	3.35995e-62
Axl__chr7	2.64289	5.28885	0.404718	13.068	5.0171e-39	5.86151e-38
Sbno2__chr10	2.09729	5.2872	0.416795	12.6854	7.12776e-37	7.56529e-36
Fus__chr7	4.02163	5.28494	0.291582	18.125	2.02256e-73	9.18848e-72
Rab14__chr2	5.99997	5.28182	0.293372	18.0038	1.81887e-72	8.03287e-71
Cct3__chr3	3.24091	5.28088	0.326167	16.1907	5.86584e-59	1.5788e-57
Oaz1__chr10	4.06772	5.27977	0.34896	15.13	1.02699e-51	2.02628e-50
Rps4x__chrX	28.2901	5.27908	0.282407	18.6932	5.62735e-78	2.96214e-76
Park7__chr4	3.66974	5.27852	0.311142	16.965	1.49136e-64	4.80233e-63
H3f3a__chr1	13.024	5.27742	0.301529	17.5022	1.37912e-68	5.26019e-67
Pilra__chr5	1.8436	5.27653	0.685149	7.70129	1.34702e-14	4.99875e-14
Vamp8__chr6	2.49749	5.27635	0.370788	14.2301	5.96068e-46	9.37476e-45
Edem1__chr6	2.01237	5.27504	0.390007	13.5255	1.1058e-41	1.47286e-40
Serpinb6a__chr13	4.55841	5.27364	0.294791	17.8894	1.42683e-71	6.05766e-70
1810058I24Rik__chr6	3.81216	5.27337	0.342675	15.3888	1.94507e-53	4.1045e-52
Ostc__chr3	2.78673	5.27055	0.299886	17.5752	3.81697e-69	1.4716e-67
Lipa__chr19	2.37389	5.26833	0.366629	14.3696	8.02584e-47	1.30249e-45
Psmb4__chr3	5.96576	5.26832	0.287265	18.3396	3.99861e-75	1.9077e-73
Cbfb__chr8	2.57305	5.26715	0.401075	13.1326	2.14244e-39	2.54048e-38
Tpp1__chr7	2.61337	5.266	0.330663	15.9256	4.21012e-57	1.03014e-55
Ppp1r18__chr17	2.23264	5.26534	0.414485	12.7033	5.66729e-37	6.04667e-36
Tomm22__chr15	2.93322	5.26397	0.364813	14.4292	3.38886e-47	5.60163e-46
Actr1a__chr19	4.05811	5.2632	0.327969	16.0478	5.91792e-58	1.4915e-56
Prkcdbp__chr7	3.43293	5.2629	0.424804	12.389	2.99724e-35	2.96297e-34
Cald1__chr6	4.22765	5.26238	0.45472	11.5728	5.66198e-31	4.67679e-30
Lyn__chr4	2.18333	5.26236	0.46988	11.1994	4.1062e-29	3.11403e-28
Srm__chr4	2.56852	5.26072	0.407236	12.9181	3.55743e-38	4.0116e-37
Psmb2__chr4	2.54679	5.26045	0.37887	13.8846	7.85459e-44	1.14919e-42
Gm8580__chr10	2.98428	5.25931	0.350499	15.0052	6.78772e-51	1.30319e-49
Cxcl16__chr11	1.83377	5.25765	0.503329	10.4458	1.53229e-25	9.89913e-25
Nfkbiz__chr16	2.08014	5.25686	0.507304	10.3624	3.67797e-25	2.33183e-24
Cggbp1__chr16	2.17667	5.25465	0.394273	13.3274	1.60297e-40	1.99532e-39
Timp2__chr11	3.32547	5.25322	0.407124	12.9033	4.31443e-38	4.84227e-37
Fam162a__chr16	4.36795	5.25184	0.334215	15.714	1.21375e-55	2.8245e-54
Hilpda__chr6	1.91847	5.24988	0.469178	11.1895	4.58825e-29	3.46854e-28
Slc43a2__chr11	2.05342	5.2485	0.415421	12.6342	1.3681e-36	1.42869e-35
Tmem167__chr13	2.60143	5.24832	0.334844	15.6739	2.28135e-55	5.25742e-54
Glul__chr1	4.91347	5.24786	0.301201	17.4231	5.51241e-68	2.05312e-66
Eif4b__chr15	5.07489	5.24672	0.311608	16.8376	1.2943e-63	4.07575e-62
Stip1__chr19	3.30014	5.24546	0.350913	14.948	1.60406e-50	3.03876e-49
Nfe2l2__chr2	3.63514	5.24484	0.386998	13.5526	7.64464e-42	1.02395e-40
Gm9846__chr3	2.47117	5.24296	0.409307	12.8093	1.45352e-37	1.58642e-36
Timm13__chr10	2.75164	5.24221	0.348461	15.0439	3.78723e-51	7.34034e-50
2310036O22Rik__chr8	2.65708	5.23977	0.349261	15.0025	7.07432e-51	1.35457e-49
Vapa__chr17	3.81045	5.23752	0.324123	16.159	9.80949e-59	2.59615e-57
Sep15__chr3	5.42768	5.23463	0.313038	16.722	9.06025e-63	2.77945e-61
H13__chr2	2.55532	5.23312	0.332922	15.7188	1.12502e-55	2.62229e-54
Psma2__chr13	3.17903	5.23234	0.350939	14.9095	2.85722e-50	5.32092e-49
Chmp4b__chr2	4.12866	5.23003	0.326905	15.9986	1.30642e-57	3.25806e-56
Ppp1cb__chr5	6.76373	5.2296	0.301455	17.3479	2.04744e-67	7.4507e-66
Trmt112__chr19	2.35571	5.22846	0.366986	14.247	4.67761e-46	7.40578e-45
Emr1__chr17	1.82342	5.228	0.65063	8.03529	9.33615e-16	3.70563e-15
Ppp1ca__chr19	6.80761	5.22756	0.30313	17.2453	1.21433e-66	4.30905e-65
Cope__chr8	3.22698	5.22734	0.313319	16.6838	1.72059e-62	5.24448e-61
Uba1__chrX	5.30674	5.22683	0.271725	19.2357	1.85964e-82	1.15842e-80
Tsn__chr1	3.11283	5.2263	0.331944	15.7445	7.48951e-56	1.75144e-54
Mrfap1__chr5	10.4898	5.22572	0.281171	18.5855	4.20978e-77	2.12952e-75
Lsm4__chr8	2.81139	5.22486	0.35048	14.9077	2.93625e-50	5.46096e-49
Ilk__chr7	4.44742	5.22416	0.35826	14.582	3.65571e-48	6.27542e-47
Capn2__chr1	3.18338	5.22177	0.374474	13.9443	3.41004e-44	5.05657e-43
Srp9__chr1	3.15809	5.22063	0.32182	16.2222	3.51537e-59	9.56999e-58
Vat1__chr11	2.17545	5.2205	0.426778	12.2324	2.08775e-34	2.00415e-33
Map2k2__chr10	4.4092	5.22036	0.309056	16.8913	5.2124e-64	1.6709e-62
Ccna2__chr3	1.67769	5.22018	0.733843	7.11348	1.13149e-12	3.74235e-12
Ppp2ca__chr11	5.03155	5.21986	0.302073	17.2801	6.63832e-67	2.37929e-65
Copg1__chr6	2.83796	5.21941	0.341922	15.2649	1.31046e-52	2.66671e-51
Uba52__chr8	27.6573	5.21861	0.256505	20.3451	5.13113e-92	4.30562e-90
Atp1b3__chr9	4.14111	5.21749	0.339138	15.3845	2.07835e-53	4.37927e-52
Eif3i__chr4	3.28116	5.21526	0.34302	15.2039	3.32976e-52	6.69944e-51
Eif3e__chr15	4.09642	5.213	0.338575	15.3969	1.71699e-53	3.63936e-52
Psap__chr10	25.1714	5.2124	0.20737	25.1357	2.02632e-139	9.96739e-137
Lrrc59__chr11	2.1465	5.21068	0.404263	12.8893	5.16954e-38	5.77475e-37
Lamc1__chr1	2.60082	5.20849	0.377161	13.8097	2.22773e-43	3.18104e-42
Psma5__chr3	2.93698	5.20815	0.324492	16.0502	5.70022e-58	1.44173e-56
Map2k1__chr9	2.45145	5.20761	0.367738	14.1612	1.5926e-45	2.47209e-44
Eif3h__chr15	6.06276	5.20712	0.333198	15.6277	4.71537e-55	1.07624e-53
Rala__chr13	2.92595	5.20635	0.376011	13.8463	1.34016e-43	1.933e-42
Ssb__chr2	3.46588	5.20508	0.360913	14.422	3.76447e-47	6.17954e-46
Gltp__chr5	2.0181	5.20403	0.40272	12.9222	3.37424e-38	3.81105e-37
Dusp3__chr11	5.35305	5.20369	0.385856	13.4861	1.88818e-41	2.47564e-40
Rpl17__chr18	43.1635	5.20311	0.293837	17.7075	3.67113e-70	1.47934e-68
Cd74__chr18	2.30308	5.20232	0.657255	7.91521	2.4683e-15	9.54468e-15
Apobec1__chr6	1.91719	5.20179	0.54119	9.61177	7.13115e-22	3.84742e-21
Fermt3__chr19	1.79024	5.20076	0.535849	9.70564	2.85284e-22	1.56763e-21
Slc25a5__chrX	11.1284	5.1982	0.271352	19.1566	8.51827e-82	5.19287e-80
Atp2b1__chr10	3.64225	5.19801	0.326738	15.9088	5.50683e-57	1.34053e-55
Pfdn1__chr18	3.18887	5.1973	0.394163	13.1857	1.06132e-39	1.27441e-38
Inpp5d__chr1	1.87042	5.19235	0.534077	9.72209	2.42737e-22	1.339e-21
Adam10__chr9	2.72916	5.19234	0.3842	13.5147	1.28108e-41	1.70154e-40
Rab32__chr10	1.85105	5.19169	0.606263	8.56343	1.09556e-17	4.861e-17
Pbrm1__chr14	3.75071	5.19055	0.319135	16.2645	1.76414e-59	4.81174e-58
Surf4__chr2	4.09498	5.19031	0.260218	19.946	1.62478e-88	1.20716e-86
Fam120a__chr13	4.01745	5.18989	0.295885	17.5402	7.06422e-69	2.7162e-67
Papola__chr12	3.87413	5.18981	0.347443	14.9372	1.88833e-50	3.55839e-49
Dnaja1__chr4	4.34029	5.18876	0.358236	14.4842	1.52487e-47	2.55008e-46
Ccnl1__chr3	2.28425	5.18824	0.458492	11.3159	1.095e-29	8.56372e-29
Map4k4__chr1	3.61455	5.18643	0.308774	16.7968	2.57415e-63	8.01752e-62
B4galt5__chr2	1.75268	5.18578	0.427927	12.1184	8.44236e-34	7.87126e-33
Klf4__chr4	5.15565	5.18483	0.458211	11.3154	1.10135e-29	8.60865e-29
Rpn1__chr6	3.05415	5.18474	0.296247	17.5014	1.39765e-68	5.31664e-67
Clec4a2__chr6	1.69226	5.18424	0.765356	6.77363	1.25592e-11	3.90832e-11
Plekho2__chr9	2.07515	5.17913	0.430256	12.0373	2.26124e-33	2.06508e-32
Zbtb7a__chr10	2.57139	5.17526	0.335899	15.4072	1.46398e-53	3.12631e-52
Sh3bgrl__chrX	2.95345	5.17325	0.396193	13.0574	5.76783e-39	6.72756e-38
Eif4e2__chr1	2.2884	5.17297	0.349533	14.7997	1.47223e-49	2.65504e-48
Prr13__chr15	3.13489	5.17239	0.370943	13.9439	3.42843e-44	5.07856e-43
Angptl4__chr17	2.35934	5.17022	0.509815	10.1413	3.62071e-24	2.18298e-23
Vcan__chr13	1.67936	5.16995	0.562187	9.19615	3.71011e-20	1.85375e-19
Eif1a__chr18	2.22565	5.16972	0.388993	13.29	2.64617e-40	3.2541e-39
Sf3b5__chr10	2.13869	5.16953	0.400024	12.9231	3.33569e-38	3.77049e-37
Myo1f__chr17	1.73602	5.16886	0.547039	9.44879	3.42759e-21	1.79364e-20
Myof__chr19	1.87452	5.16325	0.473008	10.9158	9.68996e-28	6.88726e-27
Hspe1__chr1	6.90985	5.16323	0.271911	18.9887	2.11518e-80	1.21177e-78
Top1__chr2	3.77946	5.1631	0.332767	15.5157	2.71855e-54	6.02175e-53
Slc25a39__chr11	4.99907	5.16144	0.311451	16.5723	1.10596e-61	3.24621e-60
Lrrc58__chr16	3.57928	5.16125	0.354979	14.5396	6.79952e-48	1.1547e-46
Ckb__chr12	2.76801	5.16112	0.404378	12.7631	2.6348e-37	2.84954e-36
Cltb__chr13	3.23717	5.16061	0.377749	13.6615	1.72503e-42	2.36383e-41
Jun__chr4	6.28904	5.15963	0.307949	16.7548	5.22146e-63	1.61221e-61
Ube2d2a__chr18	4.09554	5.15822	0.323604	15.9399	3.34695e-57	8.21759e-56
Gspt1__chr16	2.97934	5.15741	0.340569	15.1435	8.36327e-52	1.65928e-50
Tnfrsf1a__chr6	2.7145	5.1559	0.397542	12.9694	1.82348e-38	2.08429e-37
Hspb7__chr4	22.1531	5.15471	0.326211	15.8018	3.0253e-56	7.20465e-55
Psma7__chr2	5.42511	5.15406	0.303458	16.9845	1.07038e-64	3.48606e-63
Hspa8__chr9	38.5049	5.15321	0.229095	22.4938	4.77348e-112	9.20184e-110
Rap1a__chr3	3.44893	5.15199	0.373623	13.7893	2.95802e-43	4.19445e-42
Mir5109__chr5	270.565	5.15198	0.195404	26.3658	3.37916e-153	2.19108e-150
Tmem106a__chr11	1.5875	5.15069	0.541561	9.51083	1.89156e-21	1.00123e-20
Srsf1__chr11	3.37591	5.1505	0.336341	15.3133	6.23097e-53	1.28632e-51
Pnrc1__chr4	3.6524	5.15046	0.36708	14.0309	1.00848e-44	1.52717e-43
Jak1__chr4	4.13369	5.14407	0.305269	16.8509	1.03285e-63	3.28141e-62
Eif2s1__chr12	2.50987	5.1428	0.323672	15.8889	7.56576e-57	1.83235e-55
Fam111a__chr19	1.97193	5.1424	0.42729	12.0349	2.32838e-33	2.12232e-32
Copz1__chr15	2.31098	5.14199	0.372293	13.8117	2.16754e-43	3.09819e-42
Nhp2l1__chr15	3.05607	5.1401	0.349779	14.6953	6.91252e-49	1.22341e-47
Aif1__chr17	1.6556	5.13959	0.615201	8.35433	6.58077e-17	2.79223e-16
Snhg6__chr1	2.11067	5.1385	0.490573	10.4745	1.1314e-25	7.35281e-25
Api5__chr2	2.47143	5.13788	0.355687	14.4449	2.69763e-47	4.47983e-46
Camk1__chr6	3.30564	5.13504	0.352273	14.5769	3.94123e-48	6.74121e-47
Pea15a__chr1	4.27107	5.13453	0.343647	14.9413	1.77572e-50	3.3595e-49
Kif5b__chr18	7.28139	5.13396	0.285461	17.9848	2.56307e-72	1.12499e-70
Lgals9__chr11	4.63986	5.13171	0.358161	14.3279	1.46416e-46	2.36003e-45
Hnrnpa2b1__chr6	11.6987	5.13164	0.262349	19.5603	3.36776e-85	2.24491e-83
Flna__chrX	8.17183	5.13096	0.384814	13.3336	1.47551e-40	1.84119e-39
Vamp3__chr4	3.21006	5.13037	0.348393	14.7258	4.4018e-49	7.82939e-48
Atp6ap2__chrX	2.31627	5.1299	0.368958	13.9038	6.00966e-44	8.81974e-43
Fkbp8__chr8	3.92743	5.1295	0.322768	15.8922	7.17326e-57	1.74025e-55
Lair1__chr7	1.61015	5.12737	0.631333	8.12149	4.60492e-16	1.85983e-15
Rcan1__chr16	3.35968	5.12675	0.497597	10.303	6.82798e-25	4.27949e-24
Sept11__chr5	2.14014	5.12584	0.463519	11.0585	1.99326e-28	1.4634e-27
Adamts2__chr11	2.20644	5.12582	0.523507	9.79131	1.22697e-22	6.85309e-22
Fam96b__chr8	2.46203	5.1253	0.439063	11.6733	1.74617e-31	1.47917e-30
S100a9__chr3	2.36824	5.12399	0.875795	5.85068	4.89575e-09	1.29234e-08
Gyg__chr3	4.66563	5.12378	0.375591	13.6419	2.25565e-42	3.08208e-41
Selplg__chr5	1.73908	5.12374	0.561736	9.12126	7.42576e-20	3.66916e-19
Psmd14__chr2	2.6543	5.12272	0.332521	15.4057	1.49848e-53	3.19519e-52
Rpl21__chr5	31.7947	5.12077	0.261134	19.6098	1.27604e-85	8.58622e-84
Anxa6__chr11	4.5071	5.11977	0.258838	19.7798	4.44477e-87	3.15446e-85
Psmb6__chr11	4.66875	5.11965	0.294153	17.4047	7.59593e-68	2.80715e-66
Ralbp1__chr17	3.01427	5.1177	0.354975	14.4171	4.04204e-47	6.61378e-46
Ldha__chr7	23.316	5.11709	0.211766	24.1639	5.32853e-129	1.94901e-126
Myo1c__chr11	3.42084	5.11617	0.388051	13.1843	1.08081e-39	1.29561e-38
Prdx5__chr19	7.98965	5.11481	0.263593	19.4042	7.1174e-84	4.57341e-82
Loxl3__chr6	1.54191	5.11435	0.841042	6.08098	1.19453e-09	3.28893e-09
Pomp__chr5	3.96521	5.11409	0.288195	17.7453	1.87518e-70	7.70879e-69
AF251705__chr11	1.6556	5.11178	0.583846	8.75536	2.03452e-18	9.35903e-18
Samhd1__chr2	2.3561	5.11106	0.415202	12.3098	8.02224e-35	7.8221e-34
Nmt1__chr11	2.29592	5.11024	0.37008	13.8085	2.26575e-43	3.22887e-42
Tnfrsf1b__chr4	1.71023	5.10895	0.443042	11.5315	9.15021e-31	7.49298e-30
Gna13__chr11	1.9444	5.10664	0.388848	13.1327	2.13785e-39	2.53715e-38
Cyb5r3__chr15	5.0444	5.10321	0.368858	13.8352	1.56387e-43	2.25111e-42
Hpcal1__chr12	2.49291	5.10318	0.392409	13.0047	1.15017e-38	1.32851e-37
Aldh1a2__chr9	1.62755	5.10051	0.619004	8.23986	1.72411e-16	7.12467e-16
Medag__chr5	1.71385	5.0997	0.532835	9.57087	1.06009e-21	5.67864e-21
Irf8__chr8	1.72608	5.09941	0.562527	9.06518	1.24404e-19	6.07332e-19
Cct7__chr6	4.31007	5.09778	0.280058	18.2026	4.92374e-74	2.244e-72
Nop58__chr1	1.84885	5.09756	0.412874	12.3465	5.08667e-35	4.9939e-34
Srp14__chr2	3.49149	5.09737	0.331888	15.3587	3.09771e-53	6.44151e-52
Cct4__chr11	3.89852	5.0941	0.321831	15.8285	1.97809e-56	4.73446e-55
Prc1__chr7	1.60475	5.09389	0.594519	8.56808	1.05225e-17	4.67321e-17
Rpl31__chr1	2.6212	5.09178	0.367354	13.8607	1.09659e-43	1.59134e-42
1110007C09Rik__chr13	2.88603	5.08755	0.355761	14.3004	2.1742e-46	3.47701e-45
1810037I17Rik__chr3	2.40125	5.0875	0.40816	12.4645	1.16613e-35	1.17229e-34
Pa2g4__chr10	2.84222	5.08691	0.340136	14.9555	1.43372e-50	2.71969e-49
Mbnl1__chr3	4.82336	5.08527	0.310055	16.4012	1.87531e-60	5.29728e-59
Rbpms__chr8	5.10028	5.08384	0.369657	13.7529	4.89579e-43	6.86035e-42
Rangap1__chr15	2.03828	5.08271	0.393754	12.9083	4.03938e-38	4.54072e-37
Atp6v1e1__chr6	3.11839	5.08246	0.351738	14.4495	2.52358e-47	4.19568e-46
Myl6__chr10	25.8721	5.08238	0.274167	18.5376	1.02798e-76	5.12733e-75
Copb2__chr9	2.12728	5.08154	0.34218	14.8505	6.90641e-50	1.26308e-48
2700060E02Rik__chr14	3.1628	5.08086	0.317997	15.9777	1.82784e-57	4.52676e-56
Gatad1__chr5	3.53934	5.08017	0.349515	14.5349	7.28092e-48	1.2306e-46
Hsbp1__chr8	3.41522	5.0795	0.328813	15.448	7.78264e-54	1.68722e-52
Myo5a__chr9	1.63864	5.07824	0.4583	11.0806	1.55828e-28	1.15295e-27
Eif5__chr12	4.51743	5.07691	0.30858	16.4525	8.04909e-61	2.31027e-59
4632428N05Rik__chr10	1.85841	5.07579	0.507407	10.0034	1.47256e-23	8.63029e-23
Psma1__chr7	3.05621	5.07497	0.327927	15.4759	5.04345e-54	1.10855e-52
Metap2__chr10	3.47486	5.07324	0.313637	16.1755	7.50481e-59	2.00479e-57
Smdt1__chr15	3.14925	5.0717	0.352881	14.3723	7.72686e-47	1.25683e-45
Zfp706__chr15	4.14374	5.07112	0.341332	14.8569	6.28063e-50	1.15306e-48
Eif3k__chr7	3.14937	5.07104	0.351539	14.4252	3.58992e-47	5.91214e-46
Cx3cr1__chr9	1.70151	5.07091	0.69438	7.30279	2.81867e-13	9.68409e-13
Atpif1__chr4	4.69173	5.06885	0.329604	15.3786	2.27787e-53	4.7926e-52
Furin__chr7	2.63788	5.06817	0.290258	17.4609	2.84322e-68	1.07298e-66
Mlf2__chr6	5.0278	5.06507	0.287316	17.6289	1.47692e-69	5.78799e-68
Ltbp2__chr12	1.56812	5.06332	0.641002	7.89908	2.80976e-15	1.08181e-14
Gnai2__chr9	25.3021	5.06231	0.27701	18.2749	1.31234e-74	6.09791e-73
Ier3ip1__chr18	4.14166	5.06113	0.292112	17.326	2.99565e-67	1.07911e-65
Tbcb__chr7	2.85236	5.05803	0.36685	13.7877	3.02148e-43	4.28019e-42
Postn__chr3	1.6791	5.05798	0.696918	7.25764	3.93895e-13	1.34295e-12
Prkcb__chr7	1.64899	5.05782	0.579441	8.72878	2.57424e-18	1.17924e-17
Soat1__chr1	1.6807	5.05625	0.441551	11.4511	2.32151e-30	1.86676e-29
Gapdh__chr6	24.3715	5.05472	0.238626	21.1826	1.38326e-99	1.55372e-97
Gpi1__chr7	9.26394	5.05451	0.25387	19.9098	3.34425e-88	2.45906e-86
Yipf5__chr18	2.04212	5.0544	0.371114	13.6195	3.06583e-42	4.15328e-41
Itgb5__chr16	2.85943	5.05283	0.338349	14.9338	1.98684e-50	3.73908e-49
Hnrnph1__chr11	4.89332	5.0514	0.338131	14.9392	1.83167e-50	3.46076e-49
Taf9__chr13	2.63268	5.04965	0.344147	14.673	9.60536e-49	1.68744e-47
Myl12b__chr17	2.9118	5.04703	0.408445	12.3567	4.48176e-35	4.40609e-34
Cd300ld__chr11	1.71134	5.04697	0.610163	8.27152	1.32259e-16	5.49889e-16
Tbxas1__chr6	1.61631	5.04629	0.569498	8.86095	7.93349e-19	3.72029e-18
Eif4h__chr5	4.74532	5.04594	0.327181	15.4225	1.1559e-53	2.48328e-52
Lmo4__chr3	2.87691	5.04457	0.364222	13.8502	1.26776e-43	1.83228e-42
Sra1__chr18	2.42922	5.04222	0.366013	13.776	3.55183e-43	5.01652e-42
Tomm20__chr8	3.82795	5.04159	0.312387	16.1389	1.35911e-58	3.57048e-57
Rwdd1__chr10	3.13875	5.0415	0.351141	14.3575	9.56437e-47	1.54865e-45
Rpn2__chr2	4.04059	5.04063	0.302564	16.6597	2.57358e-62	7.778e-61
Tmed3__chr9	2.20571	5.04009	0.391915	12.8602	7.54284e-38	8.32807e-37
Setd8__chr5	5.15699	5.03978	0.309753	16.2703	1.60289e-59	4.38031e-58
Cdk1__chr10	1.52745	5.03853	0.517983	9.72721	2.30827e-22	1.27428e-21
Nptn__chr9	3.72639	5.0384	0.323363	15.5813	9.7619e-55	2.20338e-53
Ppp2r1a__chr17	3.64948	5.03791	0.308933	16.3074	8.73892e-60	2.41591e-58
Gng12__chr6	2.36205	5.03777	0.363651	13.8533	1.21476e-43	1.75925e-42
Col6a1__chr10	2.09629	5.03772	0.458203	10.9945	4.05998e-28	2.94886e-27
Gsr__chr8	2.03125	5.03278	0.456734	11.0191	3.09204e-28	2.25386e-27
Midn__chr10	2.30574	5.03244	0.36334	13.8505	1.26298e-43	1.82723e-42
Tpt1__chr14	108.599	5.03195	0.247565	20.3258	7.60724e-92	6.34604e-90
Ssr3__chr3	3.12318	5.03089	0.312439	16.102	2.46978e-58	6.38249e-57
Clec7a__chr6	1.51078	5.0308	0.686616	7.32694	2.35463e-13	8.11324e-13
Arcn1__chr9	2.27955	5.02897	0.351878	14.2918	2.46259e-46	3.9338e-45
Eif3a__chr19	5.6303	5.02725	0.284779	17.6532	9.61821e-70	3.80066e-68
Spcs2__chr7	2.46392	5.02697	0.305662	16.4461	8.93863e-61	2.5451e-59
Xbp1__chr11	3.22691	5.02632	0.31416	15.9992	1.2933e-57	3.23097e-56
Klf13__chr7	2.79441	5.02589	0.354077	14.1943	9.9346e-46	1.55221e-44
B4galt6__chr18	2.31649	5.02504	0.393777	12.7611	2.70268e-37	2.92073e-36
Serpinf1__chr11	1.67064	5.02397	0.763463	6.58051	4.68846e-11	1.40921e-10
Ifngr1__chr10	2.29437	5.02341	0.382661	13.1276	2.28878e-39	2.71175e-38
Txnrd1__chr10	1.97523	5.01923	0.353206	14.2105	7.88772e-46	1.23646e-44
Eif6__chr2	1.92445	5.01913	0.357294	14.0476	7.96722e-45	1.21036e-43
Dock2__chr11	1.54126	5.01902	0.563106	8.91309	4.96278e-19	2.35431e-18
Ddost__chr4	2.44024	5.01875	0.324492	15.4665	5.84127e-54	1.278e-52
Eif3l__chr15	2.60838	5.01834	0.326535	15.3684	2.66469e-53	5.55728e-52
Hnrnpl__chr7	2.1742	5.01803	0.34748	14.4412	2.84831e-47	4.72456e-46
Bola3__chr6	4.09827	5.01743	0.391607	12.8124	1.39698e-37	1.52704e-36
Foxp1__chr6	3.25679	5.01728	0.405841	12.3627	4.16114e-35	4.0937e-34
Nars__chr18	2.49143	5.01482	0.351989	14.2471	4.67377e-46	7.40578e-45
Srp19__chr18	2.5192	5.01472	0.363398	13.7995	2.56508e-43	3.64815e-42
Psmd1__chr1	4.73869	5.01462	0.280771	17.8602	2.4092e-71	1.01378e-69
Akap13__chr7	2.98213	5.01366	0.329865	15.1991	3.58368e-52	7.19214e-51
Rbbp4__chr4	2.58526	5.01148	0.362475	13.8257	1.7829e-43	2.55866e-42
Nono__chrX	2.34469	5.01076	0.377548	13.2718	3.372e-40	4.11476e-39
Tmpo__chr10	2.8537	5.00864	0.42116	11.8925	1.29505e-32	1.14887e-31
Gng10__chr4	1.67673	5.00827	0.415167	12.0632	1.65143e-33	1.51594e-32
Ptpn18__chr1	1.64692	5.00807	0.54504	9.18845	3.98558e-20	1.98861e-19
Psmb8__chr17	2.03084	5.00769	0.43239	11.5814	5.11909e-31	4.23081e-30
Sfr1__chr19	3.54336	5.00616	0.323025	15.4977	3.59313e-54	7.93437e-53
Vdac2__chr14	14.3958	5.00212	0.260753	19.1834	5.09752e-82	3.14788e-80
Chmp2a__chr7	3.71111	5.00166	0.337241	14.8311	9.21776e-50	1.67505e-48
Nhp2__chr11	2.03224	5.00081	0.427664	11.6933	1.37914e-31	1.17664e-30
Sec31a__chr5	3.39353	4.9998	0.292259	17.1074	1.30658e-65	4.42718e-64
Vkorc1__chr7	2.15513	4.99919	0.370113	13.5072	1.41854e-41	1.88062e-40
Ccdc88a__chr11	1.85722	4.99805	0.438938	11.3867	4.87091e-30	3.86664e-29
Syncrip__chr9	2.69894	4.99649	0.344416	14.5072	1.09143e-47	1.83816e-46
Chd7__chr4	2.27399	4.99647	0.457603	10.9188	9.3734e-28	6.6689e-27
Ssrp1__chr2	2.23098	4.99582	0.384409	12.9961	1.28731e-38	1.48452e-37
Prrc2c__chr1	3.45082	4.99545	0.370174	13.4949	1.67661e-41	2.20431e-40
Birc5__chr11	1.55268	4.99486	0.546427	9.14094	6.19092e-20	3.06538e-19
Tpi1__chr6	13.7723	4.99474	0.23795	20.9907	7.97934e-98	8.30841e-96
Gabarapl2__chr8	3.59111	4.99433	0.359853	13.8788	8.51698e-44	1.24101e-42
Runx1__chr16	1.54487	4.99046	0.510577	9.77416	1.45361e-22	8.0936e-22
Purb__chr11	4.55599	4.99008	0.323	15.4492	7.64359e-54	1.6596e-52
Maged1__chrX	2.49266	4.98912	0.413217	12.0739	1.45169e-33	1.33689e-32
Ms4a7__chr19	1.54743	4.98796	0.597236	8.35174	6.72661e-17	2.85156e-16
1810022K09Rik__chr3	2.27978	4.98795	0.385316	12.9451	2.50484e-38	2.84486e-37
Ppbp__chr5	1.52877	4.98686	0.507311	9.82999	8.36231e-23	4.7191e-22
Cwc15__chr9	2.63736	4.98539	0.348173	14.3187	1.67159e-46	2.68528e-45
Atp6v0d1__chr8	2.86236	4.98537	0.351739	14.1735	1.337e-45	2.07986e-44
Rab5c__chr11	1.76998	4.98453	0.410973	12.1286	7.45063e-34	6.97014e-33
Adamts1__chr16	1.93965	4.98262	0.555369	8.97173	2.91895e-19	1.40009e-18
Nid1__chr13	3.4937	4.98228	0.415501	11.991	3.95994e-33	3.57976e-32
Mbd2__chr18	3.20242	4.97877	0.388369	12.8197	1.27226e-37	1.39392e-36
Nav1__chr1	2.63491	4.97855	0.409167	12.1675	4.62928e-34	4.37039e-33
Adipor1__chr1	5.06568	4.9767	0.315588	15.7696	5.03401e-56	1.18694e-54
Azin1__chr15	2.88851	4.97591	0.379268	13.1198	2.53644e-39	2.99523e-38
Fndc3b__chr3	1.96053	4.97552	0.372518	13.3565	1.08616e-40	1.36994e-39
Gars__chr6	2.40101	4.97456	0.357104	13.9303	4.1477e-44	6.12494e-43
Pkia__chr3	4.08196	4.97422	0.439704	11.3127	1.13591e-29	8.86908e-29
Rap2b__chr3	1.70999	4.97381	0.40082	12.4091	2.33359e-35	2.31977e-34
Thrap3__chr4	2.31426	4.97375	0.341508	14.5641	4.7535e-48	8.12079e-47
Rps24__chr14	37.315	4.97031	0.278233	17.8638	2.25671e-71	9.52423e-70
Taok3__chr5	1.60364	4.96941	0.439778	11.2998	1.31506e-29	1.02454e-28
Bax__chr7	1.90237	4.9687	0.381711	13.0169	9.80328e-39	1.1351e-37
Atxn7l3b__chr10	2.66369	4.96789	0.352369	14.0985	3.87655e-45	5.93973e-44
Txnl4a__chr18	3.0119	4.96785	0.310275	16.0111	1.06834e-57	2.67366e-56
Bnip3l__chr14	2.80354	4.96741	0.350607	14.168	1.44506e-45	2.24551e-44
Tmem176b__chr6	2.2949	4.96717	0.39512	12.5713	3.03667e-36	3.12992e-35
Slc39a1__chr3	2.44027	4.96632	0.314032	15.8147	2.46386e-56	5.87743e-55
Smarca4__chr9	2.49742	4.96629	0.344955	14.3969	5.41038e-47	8.82047e-46
Rnf130__chr11	2.27449	4.96603	0.396894	12.5122	6.39866e-36	6.50583e-35
Snrpd2__chr7	2.31357	4.96589	0.367549	13.5108	1.34995e-41	1.79135e-40
Pdlim1__chr19	2.46837	4.964	0.42611	11.6496	2.30573e-31	1.94049e-30
Usf2__chr7	3.32099	4.9598	0.323989	15.3086	6.70242e-53	1.37965e-51
Rab10__chr12	5.1411	4.9582	0.332602	14.9073	2.95468e-50	5.48808e-49
Psma6__chr12	2.95544	4.95747	0.342455	14.4763	1.71141e-47	2.85869e-46
Bin1__chr18	1.77842	4.95569	0.442084	11.2098	3.64887e-29	2.7731e-28
Ufm1__chr3	2.28982	4.95556	0.398667	12.4303	1.78929e-35	1.78616e-34
Itm2c__chr1	3.21863	4.95484	0.298656	16.5905	8.16586e-62	2.42175e-60
Metrnl__chr11	1.61426	4.95484	0.492438	10.0619	8.14436e-24	4.83074e-23
Higd1a__chr9	4.1254	4.95481	0.321635	15.4051	1.51281e-53	3.22094e-52
Ssr2__chr3	1.9524	4.95373	0.365915	13.5379	9.33835e-42	1.2473e-40
Snrpd1__chr18	2.06622	4.95349	0.404892	12.2341	2.04317e-34	1.96268e-33
Scpep1__chr11	1.68058	4.95018	0.455679	10.8633	1.72396e-27	1.21384e-26
Nudc__chr4	2.11235	4.94939	0.373099	13.2656	3.66517e-40	4.46488e-39
Fes__chr7	1.90656	4.94877	0.467084	10.595	3.14204e-26	2.09347e-25
Ddx21__chr10	2.10615	4.9477	0.361909	13.6711	1.51118e-42	2.07879e-41
Cebpd__chr16	1.72767	4.94703	0.493223	10.03	1.12497e-23	6.63128e-23
Lgals3bp__chr11	2.24789	4.94667	0.390443	12.6694	8.7414e-37	9.23675e-36
Tcof1__chr18	2.02544	4.94625	0.357823	13.8231	1.84812e-43	2.6496e-42
Ano6__chr15	2.25656	4.94577	0.368594	13.4179	4.74765e-41	6.08493e-40
Stk17b__chr1	1.68161	4.94532	0.447049	11.0621	1.91487e-28	1.40729e-27
Fis1__chr5	3.07125	4.94512	0.300929	16.4329	1.11248e-60	3.16125e-59
Mbnl2__chr14	7.20333	4.94467	0.297004	16.6485	3.10291e-62	9.29896e-61
Eif4g1__chr16	4.26364	4.94372	0.285134	17.3382	2.4216e-67	8.74535e-66
Ywhae__chr11	17.3733	4.94366	0.252757	19.5589	3.46184e-85	2.29689e-83
Elavl1__chr8	2.00536	4.94299	0.408276	12.107	9.69952e-34	9.01979e-33
Mpp1__chrX	1.83745	4.94151	0.464898	10.6292	2.17882e-26	1.46401e-25
Tfg__chr16	2.77087	4.93889	0.36952	13.3657	9.5934e-41	1.21321e-39
Zcrb1__chr15	4.31732	4.93774	0.359234	13.7452	5.44245e-43	7.60396e-42
Hspa4__chr11	2.90472	4.93657	0.324878	15.1952	3.80666e-52	7.6267e-51
Psmc4__chr7	2.18934	4.93633	0.365648	13.5002	1.55905e-41	2.05545e-40
Rrm2__chr12	1.42772	4.93611	0.50846	9.70796	2.78857e-22	1.53468e-21
Anxa7__chr14	2.26789	4.93494	0.368176	13.4037	5.74865e-41	7.32838e-40
Ptma__chr1	22.6067	4.9347	0.352944	13.9815	2.0206e-44	3.02771e-43
Gnai3__chr3	1.95436	4.93463	0.403936	12.2164	2.54202e-34	2.43042e-33
Spop__chr11	5.84276	4.93433	0.307485	16.0474	5.96118e-58	1.49976e-56
Psmc1__chr12	3.19797	4.93359	0.31751	15.5384	1.90746e-54	4.27157e-53
Gpr65__chr12	1.42321	4.93314	0.63876	7.723	1.13624e-14	4.23971e-14
Larp1__chr11	3.53604	4.92957	0.304977	16.1637	9.09105e-59	2.41497e-57
Gpr35__chr1	1.65721	4.92918	0.682622	7.22094	5.16282e-13	1.74562e-12
Ewsr1__chr11	2.56761	4.92853	0.341466	14.4334	3.18809e-47	5.28201e-46
Ski__chr4	2.15701	4.92613	0.358728	13.7322	6.51345e-43	9.06482e-42
Swi5__chr2	3.42653	4.92587	0.316239	15.5764	1.05241e-54	2.36792e-53
Ifnar2__chr16	2.39195	4.92568	0.337332	14.6018	2.73337e-48	4.71481e-47
Llph__chr10	2.17107	4.92511	0.413899	11.8993	1.19351e-32	1.06077e-31
Mrpl17__chr7	2.71021	4.9244	0.359868	13.6839	1.26665e-42	1.74915e-41
Ptpn12__chr5	2.58365	4.92426	0.389637	12.6381	1.30223e-36	1.3629e-35
G6pdx__chrX	1.49957	4.92386	0.458146	10.7474	6.09808e-27	4.19427e-26
Eprs__chr1	2.57492	4.92298	0.31863	15.4505	7.48859e-54	1.62843e-52
Srrm2__chr17	4.9083	4.92177	0.308184	15.9702	2.05988e-57	5.09258e-56
Srp72__chr5	2.63383	4.92115	0.370173	13.2942	2.5015e-40	3.07885e-39
Smc2__chr4	1.46023	4.92107	0.579816	8.4873	2.11497e-17	9.22066e-17
Kat2b__chr17	3.1705	4.91997	0.407953	12.0601	1.71493e-33	1.57119e-32
Eif3c__chr7	3.32107	4.91996	0.313904	15.6734	2.29811e-55	5.28751e-54
Eps8__chr6	1.44217	4.9193	0.542986	9.05973	1.30771e-19	6.37324e-19
Ptp4a2__chr4	13.5453	4.91815	0.265475	18.5258	1.27822e-76	6.30929e-75
Smyd2__chr1	3.98209	4.91792	0.359104	13.695	1.08792e-42	1.50672e-41
Chp1__chr2	2.88025	4.91758	0.364541	13.4898	1.79626e-41	2.35728e-40
Irf2bp2__chr8	2.21472	4.91736	0.37412	13.1438	1.84709e-39	2.19939e-38
Ppp1r9b__chr11	2.13716	4.91689	0.353745	13.8995	6.37714e-44	9.34942e-43
Slc48a1__chr15	2.71125	4.91456	0.345138	14.2394	5.21758e-46	8.23328e-45
Rheb__chr5	3.57327	4.9145	0.36895	13.3202	1.76582e-40	2.1942e-39
Dusp6__chr10	1.88513	4.91291	0.466192	10.5384	5.74855e-26	3.78592e-25
Tmem50a__chr4	4.01241	4.912	0.305809	16.0623	4.68747e-58	1.19192e-56
Col6a3__chr1	1.66933	4.91186	0.613302	8.00888	1.15758e-15	4.56789e-15
Ralb__chr1	1.97081	4.91163	0.381713	12.8673	6.8729e-38	7.62878e-37
Khdrbs1__chr4	1.88245	4.9114	0.390175	12.5877	2.46834e-36	2.55522e-35
Etf1__chr18	2.83684	4.91049	0.318307	15.4269	1.07928e-53	2.32217e-52
Eef1d__chr15	4.09103	4.91016	0.312596	15.7077	1.34019e-55	3.11366e-54
AB124611__chr9	1.46681	4.90994	0.536384	9.15378	5.49762e-20	2.72683e-19
Ddx39b__chr17	2.96843	4.90983	0.305058	16.0948	2.77595e-58	7.12211e-57
Rgs10__chr7	1.32849	4.90792	0.615717	7.97107	1.57311e-15	6.16665e-15
Plod3__chr5	1.92866	4.90428	0.386767	12.6802	7.61303e-37	8.06834e-36
Tcea1__chr1	2.33529	4.90327	0.360093	13.6167	3.18745e-42	4.31394e-41
Slc15a3__chr19	1.44517	4.90235	0.603562	8.12237	4.57179e-16	1.8475e-15
Rcn1__chr2	1.88769	4.90062	0.489916	10.003	1.47874e-23	8.66292e-23
Srsf11__chr3	2.91118	4.89914	0.316819	15.4635	6.11362e-54	1.33554e-52
Rassf4__chr6	1.47879	4.89908	0.706049	6.93872	3.95671e-12	1.26609e-11
Cenpe__chr3	1.50023	4.89895	0.73527	6.66279	2.68679e-11	8.21764e-11
Cd38__chr5	1.97346	4.89808	0.515199	9.50715	1.9595e-21	1.03642e-20
Bub3__chr7	1.95147	4.89796	0.388489	12.6077	1.91427e-36	1.98742e-35
Psmb7__chr2	5.86632	4.89743	0.286857	17.0727	2.36993e-65	7.97335e-64
Rnps1__chr17	2.882	4.89693	0.32683	14.9831	9.46811e-51	1.80324e-49
Hnrnpd__chr5	2.56451	4.8946	0.371497	13.1753	1.21711e-39	1.45533e-38
Whsc1__chr5	1.52908	4.88947	0.447201	10.9335	7.9717e-28	5.69151e-27
Eif5b__chr1	7.31787	4.88882	0.296601	16.4828	4.87618e-61	1.41956e-59
1110004F10Rik__chr7	2.22553	4.8867	0.366022	13.3508	1.17129e-40	1.4734e-39
Mlec__chr5	3.18926	4.88459	0.284531	17.1672	4.67678e-66	1.61146e-64
Srsf6__chr2	2.15337	4.88448	0.34028	14.3543	1.00149e-46	1.61975e-45
Arl8a__chr1	1.74079	4.88375	0.439079	11.1227	9.72706e-29	7.26094e-28
Anp32e__chr3	2.31964	4.88343	0.376424	12.9732	1.73555e-38	1.98537e-37
Epb4.1l2__chr10	1.77528	4.88262	0.450343	10.842	2.17676e-27	1.52587e-26
Dnajc3__chr14	2.36296	4.88223	0.35073	13.9202	4.77666e-44	7.03915e-43
Rab11a__chr9	3.13533	4.88212	0.358141	13.6319	2.58882e-42	3.52045e-41
Syk__chr13	1.611	4.88189	0.493827	9.88583	4.79576e-23	2.74084e-22
Tmem134__chr19	2.60245	4.88168	0.378913	12.8834	5.58488e-38	6.21437e-37
Mta1__chr12	2.49735	4.87981	0.390671	12.4908	8.37651e-36	8.48055e-35
0610031J06Rik__chr3	1.81804	4.87919	0.36197	13.4796	2.06322e-41	2.70017e-40
Rnf7__chr9	2.97162	4.87864	0.375047	13.0081	1.10067e-38	1.27341e-37
Anapc11__chr11	2.50737	4.87759	0.328506	14.8478	7.19058e-50	1.31336e-48
Ddx39__chr8	1.47988	4.8775	0.478687	10.1893	2.21314e-24	1.35437e-23
Mtch1__chr17	3.3803	4.87747	0.313425	15.5618	1.32275e-54	2.9715e-53
Cmtm3__chr8	1.61208	4.87669	0.437362	11.1502	7.14086e-29	5.35283e-28
Psmd2__chr16	2.96676	4.87331	0.30208	16.1325	1.50677e-58	3.93664e-57
Copb1__chr7	1.75688	4.87293	0.432629	11.2635	1.98655e-29	1.52848e-28
Lsm6__chr8	2.06623	4.87193	0.388444	12.5422	4.38782e-36	4.49981e-35
Synj2bp__chr12	5.17824	4.87142	0.289997	16.7982	2.51671e-63	7.87299e-62
Ddx3x__chrX	5.92904	4.87117	0.336074	14.4943	1.3155e-47	2.20513e-46
Rap2a__chr14	1.68259	4.87111	0.398587	12.221	2.40258e-34	2.30019e-33
Hmha1__chr10	1.46027	4.87098	0.561317	8.67778	4.03577e-18	1.83228e-17
Tbl1xr1__chr3	2.13055	4.86995	0.378599	12.8631	7.26135e-38	8.04217e-37
Psmd7__chr8	3.20992	4.86925	0.30772	15.8236	2.1376e-56	5.10769e-55
Tlr13__chrX	1.36773	4.86891	0.62573	7.78118	7.18512e-15	2.69939e-14
Edf1__chr2	3.05005	4.86852	0.323754	15.0377	4.15743e-51	8.04691e-50
0610009D07Rik__chr12	1.69174	4.86842	0.43003	11.3211	1.03162e-29	8.0769e-29
Cnbp__chr6	6.10602	4.86746	0.301152	16.1628	9.22796e-59	2.44678e-57
Ppig__chr2	3.72812	4.86693	0.366508	13.2792	3.05647e-40	3.74254e-39
Sumo3__chr10	2.46212	4.86664	0.337368	14.4253	3.58566e-47	5.91214e-46
Psme3__chr11	2.26877	4.86591	0.322565	15.085	2.0314e-51	3.96957e-50
Acly__chr11	1.92684	4.86403	0.377071	12.8995	4.53003e-38	5.08026e-37
Usmg5__chr19	9.59111	4.86381	0.275908	17.6284	1.49119e-69	5.82789e-68
U2af1__chr17	2.16452	4.86318	0.386779	12.5736	2.95146e-36	3.0465e-35
Lpp__chr16	3.87221	4.86131	0.337267	14.4138	4.23615e-47	6.92195e-46
Srsf7__chr17	2.36306	4.86066	0.388027	12.5266	5.34173e-36	5.44284e-35
Cerk__chr15	1.81745	4.86035	0.438774	11.0771	1.61997e-28	1.19426e-27
Pfdn5__chr15	3.39042	4.85996	0.334277	14.5387	6.88426e-48	1.16493e-46
Pdlim5__chr3	13.771	4.85912	0.293	16.5841	9.08893e-62	2.67879e-60
Slmo2__chr2	2.53918	4.85867	0.391967	12.3956	2.75989e-35	2.73592e-34
Dnajc8__chr4	2.86475	4.85833	0.335118	14.4974	1.25867e-47	2.11235e-46
Zc3h11a__chr1	3.57421	4.85814	0.314642	15.4402	8.78255e-54	1.89536e-52
Csk__chr9	1.63362	4.85662	0.379987	12.781	2.09332e-37	2.27254e-36
Vps29__chr5	1.87683	4.85639	0.349911	13.8789	8.50314e-44	1.24026e-42
P4ha1__chr10	1.9156	4.85555	0.362545	13.393	6.64736e-41	8.4514e-40
Rbm8a__chr3	1.92133	4.85542	0.351624	13.8086	2.26321e-43	3.22847e-42
Sparc__chr11	55.2864	4.8553	0.315338	15.3971	1.71052e-53	3.63104e-52
Atp13a2__chr4	1.62771	4.85366	0.461898	10.5081	7.9298e-26	5.19608e-25
Hsp90b1__chr10	11.0631	4.85323	0.217734	22.2897	4.6462e-110	8.18248e-108
Cmpk1__chr4	1.90362	4.85174	0.417447	11.6224	3.1709e-31	2.64519e-30
Crtap__chr9	2.45484	4.85165	0.311217	15.5893	8.61085e-55	1.94665e-53
Ap1b1__chr11	2.1648	4.84922	0.343691	14.1092	3.33118e-45	5.12062e-44
Atp6v0e__chr17	1.817	4.84816	0.340667	14.2313	5.85429e-46	9.2176e-45
Cnih__chr14	2.84362	4.84725	0.294587	16.4544	7.79946e-61	2.24313e-59
Tcp1__chr17	2.32774	4.84698	0.352653	13.7443	5.50715e-43	7.68684e-42
Acp1__chr12	1.90994	4.84688	0.365165	13.2731	3.31507e-40	4.04876e-39
Nufip2__chr11	2.27194	4.84668	0.386523	12.5392	4.55687e-36	4.66981e-35
Timm10b__chr7	2.23019	4.84663	0.356818	13.5829	5.05595e-42	6.79126e-41
Neurl3__chr1	1.70212	4.84616	0.539754	8.97846	2.74593e-19	1.31977e-18
Ctbp1__chr5	4.50199	4.84546	0.295509	16.397	2.0102e-60	5.65592e-59
Cd47__chr16	3.60574	4.84487	0.332836	14.5563	5.324e-48	9.08456e-47
Gpsm3__chr17	1.36396	4.84429	0.489363	9.89919	4.19657e-23	2.40515e-22
Ppp4c__chr7	1.6757	4.8438	0.361189	13.4107	5.23352e-41	6.68962e-40
Arid1a__chr4	2.03711	4.84366	0.3848	12.5875	2.47445e-36	2.55968e-35
Serpina3n__chr12	1.33345	4.84259	0.652711	7.4192	1.17829e-13	4.14508e-13
Cdv3__chr9	3.23778	4.84249	0.315314	15.3577	3.14577e-53	6.53193e-52
Tmed5__chr5	2.31591	4.84235	0.364168	13.297	2.40876e-40	2.96984e-39
Arap1__chr7	1.63985	4.84209	0.441897	10.9575	6.11623e-28	4.39758e-27
Serping1__chr2	2.21975	4.84098	0.482035	10.0428	9.88248e-24	5.83742e-23
Tor1aip2__chr1	1.86921	4.84042	0.382458	12.6561	1.03548e-36	1.09092e-35
Mapre2__chr18	3.57668	4.83965	0.358326	13.5063	1.4359e-41	1.90187e-40
Nop56__chr2	2.69883	4.8382	0.352241	13.7355	6.22457e-43	8.67971e-42
Zfp207__chr11	2.21376	4.83802	0.377521	12.8152	1.34704e-37	1.47472e-36
Ube2k__chr5	2.84502	4.83777	0.307518	15.7317	9.17427e-56	2.14191e-54
Tmod3__chr9	2.09208	4.83757	0.431346	11.215	3.44032e-29	2.62019e-28
Bmp1__chr14	1.42039	4.83722	0.556344	8.69466	3.47883e-18	1.58497e-17
Rer1__chr4	2.41206	4.83637	0.312858	15.4587	6.59119e-54	1.43767e-52
Xpo1__chr11	1.9499	4.83516	0.378947	12.7594	2.76183e-37	2.9824e-36
Ifnar1__chr16	1.95747	4.83488	0.347705	13.9051	5.89874e-44	8.66586e-43
Impdh2__chr9	1.64028	4.83306	0.418795	11.5404	8.25615e-31	6.78031e-30
Ahsa1__chr12	2.28312	4.83296	0.364477	13.26	3.94828e-40	4.80156e-39
Twf1__chr15	1.83761	4.83255	0.379379	12.738	3.63432e-37	3.91568e-36
Csrp3__chr7	19.5457	4.83239	0.313636	15.4076	1.45419e-53	3.11005e-52
Mxra8__chr4	1.4516	4.83189	0.576517	8.38117	5.24036e-17	2.23146e-16
Use1__chr8	3.01362	4.83176	0.404354	11.9493	6.54425e-33	5.875e-32
Psenen__chr7	2.44467	4.82967	0.318938	15.143	8.43104e-52	1.6704e-50
Stx7__chr10	2.06969	4.82859	0.361523	13.3563	1.08896e-40	1.37226e-39
Sfxn1__chr13	1.73735	4.82751	0.439778	10.9772	4.92121e-28	3.5473e-27
Psmc2__chr5	3.49697	4.82738	0.30033	16.0736	3.90724e-58	9.98868e-57
Zmiz1__chr14	2.03216	4.82575	0.378952	12.7344	3.80531e-37	4.09064e-36
Plxnb2__chr15	2.02203	4.82571	0.35068	13.761	4.37415e-43	6.14751e-42
Ier5__chr1	2.18842	4.82557	0.41201	11.7123	1.10295e-31	9.43259e-31
Igsf8__chr1	1.52832	4.82552	0.367662	13.1249	2.37139e-39	2.8073e-38
Trip12__chr1	2.87465	4.82512	0.32643	14.7815	1.92928e-49	3.47052e-48
Mgat2__chr12	1.91782	4.82425	0.434932	11.092	1.37221e-28	1.01845e-27
Il2rg__chrX	1.706	4.82422	0.40968	11.7756	5.21598e-32	4.50672e-31
Pxn__chr5	2.4378	4.82362	0.402154	11.9944	3.7998e-33	3.43717e-32
Rrm1__chr7	1.33696	4.82301	0.539629	8.93763	3.97607e-19	1.89314e-18
Plcg2__chr8	1.5771	4.82178	0.519914	9.27418	1.78987e-20	9.04766e-20
Glt25d1__chr8	1.93068	4.82164	0.329668	14.6258	1.9242e-48	3.34333e-47
Vps35__chr8	2.62792	4.81944	0.327521	14.7149	5.17152e-49	9.16419e-48
Tab2__chr10	2.52315	4.81695	0.341021	14.1251	2.66093e-45	4.09915e-44
Kdelr3__chr15	1.39446	4.81517	0.497314	9.68237	3.58325e-22	1.95768e-21
Arf5__chr6	1.66187	4.81507	0.400784	12.0141	2.99565e-33	2.72358e-32
Med28__chr5	1.97492	4.81472	0.396412	12.1457	6.04395e-34	5.69465e-33
Jhdm1d__chr6	2.01668	4.81459	0.381691	12.6138	1.77168e-36	1.84206e-35
Abce1__chr8	1.87999	4.81447	0.363298	13.2521	4.38609e-40	5.32944e-39
Slc39a14__chr14	1.66187	4.81349	0.376187	12.7955	1.73793e-37	1.89248e-36
Ndufa7__chr17	4.87684	4.81243	0.275731	17.4534	3.24589e-68	1.2217e-66
Sin3b__chr8	2.09796	4.81234	0.379906	12.6672	8.99122e-37	9.49369e-36
Ssu72__chr4	1.90474	4.81225	0.391376	12.2957	9.54793e-35	9.27802e-34
Abhd17a__chr10	2.25748	4.81199	0.392601	12.2567	1.54724e-34	1.49031e-33
Adrbk1__chr19	2.14493	4.81113	0.36263	13.2673	3.58151e-40	4.36669e-39
Snx18__chr13	1.46206	4.81111	0.396693	12.1281	7.50121e-34	7.01211e-33
Rnpep__chr1	1.43456	4.81032	0.443599	10.8438	2.13334e-27	1.4969e-26
A130077B15Rik__chr10	7.6083	4.8096	0.314624	15.2868	9.36073e-53	1.91305e-51
Bclaf1__chr10	2.56897	4.80894	0.343908	13.9832	1.97353e-44	2.9603e-43
Cks2__chr13	1.27325	4.80791	0.63415	7.58167	3.41141e-14	1.23921e-13
Pdcd5__chr7	2.79497	4.80748	0.353201	13.6112	3.43636e-42	4.64201e-41
Tacc1__chr8	1.92499	4.80647	0.368871	13.0302	8.23764e-39	9.56922e-38
Mtdh__chr15	2.90431	4.80581	0.31553	15.2309	2.20553e-52	4.46268e-51
Cux1__chr5	2.05042	4.80504	0.358146	13.4164	4.846e-41	6.2054e-40
Osbpl8__chr10	2.52057	4.80247	0.332934	14.4247	3.61896e-47	5.94752e-46
Cd24a__chr10	1.8065	4.80144	0.679644	7.06464	1.61028e-12	5.27576e-12
Flot1__chr17	3.37619	4.79972	0.334726	14.3392	1.24423e-46	2.01008e-45
Egr2__chr10	1.37939	4.79852	0.617232	7.77426	7.58926e-15	2.84747e-14
Sipa1__chr19	1.83694	4.79762	0.438378	10.944	7.09784e-28	5.08797e-27
Phb2__chr6	2.80757	4.79658	0.327428	14.6492	1.36224e-48	2.38434e-47
Wipf1__chr2	1.86973	4.79487	0.45449	10.55	5.07972e-26	3.35473e-25
Cers2__chr3	1.68503	4.79388	0.379091	12.6457	1.18132e-36	1.23999e-35
Cdc37__chr9	2.61944	4.79354	0.33495	14.3112	1.86166e-46	2.98724e-45
Ppp2r4__chr2	2.07893	4.79279	0.334945	14.3092	1.9179e-46	3.07402e-45
Ap3d1__chr10	2.81285	4.79274	0.333785	14.3588	9.38823e-47	1.52185e-45
Vti1b__chr12	2.63401	4.7911	0.351384	13.6349	2.48166e-42	3.37795e-41
Ehd1__chr19	2.46794	4.79074	0.378846	12.6456	1.1827e-36	1.24053e-35
Chd4__chr6	3.62338	4.78959	0.306283	15.6378	4.02348e-55	9.1979e-54
2810474O19Rik__chr6	2.47326	4.78955	0.440652	10.8692	1.61581e-27	1.1422e-26
Josd2__chr7	2.49945	4.78946	0.444136	10.7838	4.10722e-27	2.84553e-26
Csnk1d__chr11	2.11521	4.78919	0.376206	12.7302	4.01736e-37	4.31533e-36
Dtnbp1__chr13	2.9775	4.787	0.295804	16.183	6.64608e-59	1.78208e-57
Dctn2__chr10	2.69344	4.78698	0.367465	13.027	8.58933e-39	9.96964e-38
Pten__chr19	3.77595	4.78589	0.320496	14.9327	2.01779e-50	3.79232e-49
Nfkbid__chr7	1.30947	4.78568	0.56173	8.51954	1.6019e-17	7.04413e-17
Prdx4__chrX	1.68717	4.78501	0.396169	12.0782	1.37671e-33	1.27112e-32
Mrpl18__chr17	4.46861	4.78468	0.33154	14.4317	3.26967e-47	5.41088e-46
Psmd11__chr11	2.7625	4.78421	0.322044	14.8558	6.38321e-50	1.17039e-48
Ifrd1__chr12	1.88884	4.78409	0.423611	11.2936	1.41147e-29	1.09606e-28
Snhg1__chr19	1.5037	4.78397	0.467553	10.2319	1.42643e-24	8.81247e-24
Tpx2__chr2	1.16482	4.78198	0.646207	7.40007	1.36117e-13	4.76843e-13
Zfhx3__chr8	2.34759	4.78177	0.354052	13.5058	1.44443e-41	1.9114e-40
Tmem256__chr11	2.9192	4.78105	0.323731	14.7686	2.3346e-49	4.18379e-48
Sptssa__chr12	2.03612	4.7806	0.374226	12.7746	2.27214e-37	2.46293e-36
Fmnl1__chr11	1.55267	4.78029	0.470079	10.1691	2.72379e-24	1.65692e-23
Bag1__chr4	3.82532	4.78001	0.335775	14.2357	5.49771e-46	8.66573e-45
Dazap1__chr10	1.85524	4.78	0.338533	14.1197	2.87016e-45	4.4167e-44
Txndc9__chr1	2.17526	4.7784	0.356487	13.4041	5.71935e-41	7.29755e-40
Mapk3__chr7	2.15193	4.77683	0.366706	13.0263	8.66841e-39	1.00532e-37
Cacybp__chr1	2.90475	4.77446	0.389696	12.2517	1.64417e-34	1.58153e-33
Clec4n__chr6	1.221	4.77231	0.592309	8.05712	7.81143e-16	3.11344e-15
Pdgfra__chr5	1.39826	4.77228	0.574363	8.30883	9.66533e-17	4.05041e-16
Golga7__chr8	1.70519	4.77223	0.405294	11.7747	5.26763e-32	4.54859e-31
AI607873__chr1	1.43439	4.77134	0.57914	8.23866	1.74151e-16	7.19244e-16
Prkaca__chr8	4.28587	4.77101	0.335493	14.2209	6.79923e-46	1.06818e-44
Khsrp__chr17	1.78936	4.77068	0.31938	14.9373	1.88357e-50	3.55413e-49
Wsb1__chr11	1.63955	4.76999	0.423852	11.2539	2.21561e-29	1.69923e-28
Gmfb__chr14	2.02507	4.76899	0.397088	12.0099	3.1514e-33	2.86335e-32
Evi2b__chr11	1.57906	4.76879	0.612274	7.78864	6.77325e-15	2.54801e-14
Plekho1__chr3	1.93409	4.76797	0.434069	10.9844	4.54483e-28	3.28929e-27
Dock8__chr19	1.36955	4.76758	0.525931	9.06502	1.24579e-19	6.07978e-19
Ubxn1__chr19	2.85948	4.76492	0.311706	15.2866	9.39445e-53	1.91719e-51
Actn4__chr7	4.5891	4.76403	0.381745	12.4796	9.64505e-36	9.7372e-35
Tmed9__chr13	3.61842	4.7633	0.277967	17.1362	7.96425e-66	2.72446e-64
Zfp71-rs1__chr13	4.40014	4.76223	0.313804	15.1758	5.11247e-52	1.01999e-50
Eif1ax__chrX	1.98291	4.76159	0.374438	12.7166	4.7817e-37	5.12094e-36
Ccnb1__chr13	1.17192	4.76059	0.807884	5.89267	3.80007e-09	1.01002e-08
Egr1__chr18	5.25059	4.7602	0.447854	10.6289	2.18653e-26	1.4685e-25
Pak2__chr16	1.83648	4.76017	0.398413	11.9478	6.66464e-33	5.97931e-32
Eif3b__chr5	2.22537	4.76004	0.336981	14.1256	2.64246e-45	4.07511e-44
Irak1__chrX	2.59226	4.75893	0.340885	13.9605	2.71465e-44	4.05069e-43
Il1rn__chr2	1.38634	4.7589	0.716484	6.64202	3.0942e-11	9.43137e-11
Ier2__chr8	2.4243	4.75877	0.427748	11.1252	9.4618e-29	7.07404e-28
Ero1l__chr14	1.7258	4.75846	0.420311	11.3213	1.02958e-29	8.06529e-29
Btbd1__chr7	3.03393	4.75731	0.379185	12.5461	4.17324e-36	4.28283e-35
Ifi27l2a__chr12	1.41842	4.75617	0.593779	8.01	1.14711e-15	4.53033e-15
Mrpl30__chr1	3.98878	4.756	0.337783	14.08	5.03747e-45	7.70198e-44
Ubap2l__chr3	1.93769	4.75586	0.368068	12.9211	3.42083e-38	3.86061e-37
Ttyh3__chr5	1.41092	4.75549	0.429237	11.0789	1.58763e-28	1.17284e-27
Lat2__chr5	1.29559	4.75546	0.553334	8.5942	8.38503e-18	3.74257e-17
Gns__chr10	3.19302	4.75545	0.304678	15.6081	6.40756e-55	1.45086e-53
Hip1__chr5	1.75931	4.75355	0.38854	12.2344	2.03604e-34	1.95715e-33
Map2k3__chr11	3.03188	4.75263	0.340759	13.9472	3.2729e-44	4.85827e-43
Casp8__chr1	1.4877	4.75169	0.405803	11.7093	1.14153e-31	9.75668e-31
Por__chr5	1.66838	4.75144	0.389949	12.1848	3.74761e-34	3.55923e-33
Ugdh__chr5	1.3211	4.75071	0.471317	10.0797	6.79647e-24	4.04302e-23
Reep3__chr10	2.96863	4.75021	0.393458	12.073	1.46742e-33	1.3505e-32
Snx6__chr12	1.77172	4.74952	0.421552	11.2667	1.91558e-29	1.47468e-28
Tomm5__chr4	2.03747	4.74936	0.368675	12.8822	5.66596e-38	6.29968e-37
Dph3__chr14	2.46258	4.74933	0.400991	11.844	2.31237e-32	2.0324e-31
Napa__chr7	2.86784	4.74901	0.311903	15.2259	2.38116e-52	4.81123e-51
Vps26a__chr10	2.37342	4.74857	0.350439	13.5503	7.88656e-42	1.05536e-40
Rbbp7__chrX	3.00354	4.74796	0.351117	13.5224	1.15278e-41	1.53256e-40
Adprh__chr16	1.74158	4.74647	0.362571	13.0911	3.69976e-39	4.35095e-38
Tmem173__chr18	1.40638	4.74617	0.457	10.3855	2.88645e-25	1.84147e-24
Hp1bp3__chr4	2.20646	4.74508	0.361645	13.1208	2.50201e-39	2.95701e-38
Apobec3__chr15	1.38513	4.74457	0.521192	9.1033	8.76285e-20	4.31042e-19
Tgfbr2__chr9	1.79525	4.74301	0.449548	10.5506	5.04566e-26	3.33378e-25
Tob2__chr15	2.05831	4.74233	0.426294	11.1246	9.52653e-29	7.11869e-28
Brd4__chr17	2.52184	4.74226	0.357586	13.2619	3.85068e-40	4.68686e-39
Osbpl9__chr4	2.3357	4.74106	0.378317	12.532	4.98903e-36	5.09438e-35
Sf3b2__chr19	3.05585	4.74084	0.327495	14.4761	1.71617e-47	2.8633e-46
Cygb__chr11	1.70749	4.73986	0.508372	9.3236	1.12454e-20	5.74762e-20
Txndc5__chr13	1.26204	4.73742	0.497151	9.52913	1.58605e-21	8.43275e-21
Anxa4__chr6	1.46022	4.73633	0.420773	11.2562	2.15749e-29	1.65644e-28
Psme2__chr14	2.36047	4.7351	0.353233	13.405	5.64979e-41	7.21525e-40
Degs1__chr1	1.95061	4.73442	0.34267	13.8163	2.0339e-43	2.91301e-42
Rsu1__chr2	2.16739	4.73303	0.409883	11.5473	7.61985e-31	6.26497e-30
Cox17__chr16	6.71227	4.733	0.305593	15.4879	4.18666e-54	9.23071e-53
Csrp1__chr1	2.65735	4.73251	0.474847	9.96638	2.13876e-23	1.23921e-22
Eif4g3__chr4	2.15551	4.73249	0.375389	12.6069	1.93412e-36	2.00656e-35
Snrpc__chr17	1.44975	4.72866	0.409227	11.5551	6.95562e-31	5.72875e-30
Ptpre__chr7	1.50855	4.72777	0.485947	9.729	2.26823e-22	1.25266e-21
Cnn3__chr3	1.67223	4.72702	0.488588	9.67486	3.85632e-22	2.10365e-21
Rab8a__chr8	1.50554	4.72683	0.426408	11.0852	1.47953e-28	1.09639e-27
Mbd3__chr10	2.19325	4.7264	0.35786	13.2074	7.954e-40	9.59931e-39
Rtn3__chr19	3.46248	4.72605	0.298382	15.8389	1.67714e-56	4.02768e-55
Cdc42se1__chr3	1.42861	4.72518	0.446696	10.5781	3.7665e-26	2.4967e-25
Nsf__chr11	1.4827	4.72502	0.451454	10.4662	1.23466e-25	8.00931e-25
Coa5__chr1	3.65803	4.72423	0.321796	14.6808	8.55438e-49	1.50838e-47
Tmed10__chr12	6.16421	4.7241	0.261947	18.0346	1.04262e-72	4.63333e-71
Crk__chr11	2.51089	4.7239	0.410936	11.4955	1.39037e-30	1.13012e-29
Rnf187__chr11	2.9269	4.72341	0.319373	14.7896	1.709e-49	3.07814e-48
Hnrpdl__chr5	3.13957	4.72338	0.34236	13.7965	2.67437e-43	3.79601e-42
Szrd1__chr4	1.75097	4.72304	0.415912	11.3559	6.93505e-30	5.47171e-29
Lims1__chr10	2.59794	4.72291	0.354844	13.3098	2.03029e-40	2.51407e-39
Cbr2__chr11	1.5565	4.72255	0.416648	11.3346	8.84166e-30	6.94146e-29
Cfh__chr1	2.52333	4.71889	0.62366	7.56644	3.83596e-14	1.38918e-13
Uso1__chr5	1.9087	4.71845	0.377512	12.4988	7.57769e-36	7.69365e-35
2410006H16Rik__chr11	1.4013	4.71635	0.53481	8.81874	1.15752e-18	5.37503e-18
Akr1b8__chr6	1.3698	4.71531	0.561311	8.40054	4.44414e-17	1.90606e-16
Qars__chr9	1.77474	4.71446	0.420781	11.2041	3.89404e-29	2.95786e-28
Tpm2__chr4	1.73536	4.71413	0.596408	7.9042	2.69659e-15	1.04049e-14
Strap__chr6	2.28271	4.71408	0.338346	13.9327	4.00768e-44	5.92431e-43
Luc7l2__chr6	3.017	4.71395	0.317669	14.8392	8.17159e-50	1.48873e-48
Riok3__chr18	2.03572	4.71321	0.355998	13.2394	5.19467e-40	6.29049e-39
Stat6__chr10	1.85082	4.71264	0.372518	12.6508	1.10802e-36	1.16562e-35
Kpna4__chr3	2.08923	4.71188	0.360016	13.088	3.85796e-39	4.52953e-38
Bola2__chr7	1.52562	4.71111	0.383575	12.2821	1.12995e-34	1.09428e-33
Cttn__chr7	1.51521	4.71077	0.500181	9.41815	4.59112e-21	2.38068e-20
Sdc1__chr12	1.26702	4.70981	0.583141	8.07663	6.65835e-16	2.67177e-15
Tnfaip1__chr11	3.5905	4.70904	0.372656	12.6364	1.32943e-36	1.38932e-35
Wisp1__chr15	1.3013	4.70802	0.608234	7.74048	9.90432e-15	3.69953e-14
Spred1__chr2	1.72247	4.70697	0.434902	10.8231	2.67707e-27	1.87198e-26
Ptk2b__chr14	1.25868	4.70616	0.507179	9.27908	1.70946e-20	8.65348e-20
Ubc__chr5	14.0502	4.70544	0.259698	18.1189	2.26026e-73	1.02033e-71
Pxdn__chr12	1.97051	4.70367	0.453044	10.3824	2.98246e-25	1.90017e-24
Itgav__chr2	1.38704	4.70251	0.432792	10.8655	1.68271e-27	1.18596e-26
Mrpl54__chr10	2.24455	4.7021	0.362288	12.9789	1.612e-38	1.85147e-37
Ubxn4__chr1	4.2849	4.70032	0.329972	14.2446	4.84424e-46	7.65261e-45
Eny2__chr15	1.91662	4.69966	0.388137	12.1083	9.55008e-34	8.88662e-33
Zmat2__chr18	1.77838	4.69864	0.360849	13.0211	9.28678e-39	1.07617e-37
Fgfr1op2__chr6	2.75236	4.69812	0.349139	13.4563	2.82754e-41	3.65352e-40
Asah1__chr8	1.57542	4.69795	0.418007	11.2389	2.62598e-29	2.00856e-28
Pcgf5__chr19	2.4332	4.69615	0.535027	8.77741	1.67286e-18	7.72778e-18
Racgap1__chr15	1.15137	4.69533	0.702546	6.6833	2.33613e-11	7.16664e-11
Calu__chr6	3.64991	4.69507	0.291423	16.1108	2.14131e-58	5.5437e-57
Mprip__chr11	3.30241	4.69425	0.361372	12.9901	1.39286e-38	1.60365e-37
Srsf9__chr5	1.31785	4.69178	0.413533	11.3456	7.79756e-30	6.13188e-29
Ykt6__chr11	2.05824	4.69156	0.343517	13.6574	1.82294e-42	2.49321e-41
Scd2__chr19	1.44392	4.68885	0.551207	8.50651	1.79244e-17	7.85536e-17
Ctdsp2__chr10	2.7919	4.68769	0.350709	13.3663	9.51491e-41	1.20435e-39
Fbxl5__chr5	1.70254	4.68751	0.39396	11.8985	1.20561e-32	1.07087e-31
Rad21__chr15	2.42195	4.68707	0.387808	12.0861	1.25152e-33	1.15778e-32
Bicc1__chr10	1.23331	4.68687	0.756045	6.19919	5.67545e-10	1.59496e-09
Fbl__chr7	1.44052	4.68647	0.431286	10.8663	1.66864e-27	1.17663e-26
Hmmr__chr11	1.29169	4.68509	0.545863	8.58289	9.25182e-18	4.12171e-17
Rnasek__chr11	3.42879	4.68495	0.2906	16.1216	1.79818e-58	4.6894e-57
Ube2r2__chr4	6.12741	4.68437	0.285644	16.3993	1.93445e-60	5.45355e-59
Carhsp1__chr16	1.85718	4.68412	0.407067	11.507	1.21654e-30	9.91653e-30
Atp6v1f__chr6	3.17387	4.68343	0.323939	14.4578	2.23888e-47	3.72667e-46
Trem1__chr17	1.30779	4.6832	0.759971	6.16234	7.16762e-10	2.0009e-09
Sugt1__chr14	2.12425	4.68259	0.395476	11.8404	2.41305e-32	2.11699e-31
Slc6a6__chr6	5.87592	4.68105	0.386309	12.1174	8.54333e-34	7.955e-33
Prpf8__chr11	2.51112	4.68011	0.363804	12.8644	7.14207e-38	7.91621e-37
Mrpl20__chr4	2.24866	4.67975	0.366239	12.7779	2.17995e-37	2.36479e-36
Cox14__chr15	3.12382	4.67939	0.363953	12.8571	7.84332e-38	8.65313e-37
Sec14l1__chr11	2.94164	4.67938	0.346736	13.4955	1.66223e-41	2.18742e-40
Dnajb6__chr5	2.8823	4.67884	0.31536	14.8365	8.50682e-50	1.54783e-48
Lbh__chr17	9.8244	4.67839	0.297001	15.7521	6.64393e-56	1.55625e-54
Skap2__chr6	1.38167	4.67813	0.484168	9.66221	4.36345e-22	2.37394e-21
Fcgr4__chr1	1.23819	4.67746	0.634255	7.37473	1.64675e-13	5.73927e-13
Sh3kbp1__chrX	3.83575	4.67714	0.347278	13.468	2.41358e-41	3.13567e-40
Secisbp2l__chr2	1.62462	4.67622	0.38427	12.1691	4.54097e-34	4.29271e-33
Igsf6__chr7	1.15167	4.67562	0.615561	7.5957	3.06139e-14	1.1149e-13
Fam46a__chr9	1.42988	4.67462	0.443256	10.5461	5.29552e-26	3.4924e-25
Timm23__chr14	5.21498	4.67444	0.308162	15.1688	5.69035e-52	1.13212e-50
Epn1__chr7	3.60373	4.67392	0.271906	17.1895	3.18502e-66	1.10756e-64
Mcfd2__chr17	2.19746	4.67302	0.333686	14.0042	1.46891e-44	2.208e-43
Clic5__chr17	5.40191	4.67282	0.445091	10.4986	8.7698e-26	5.73333e-25
Isca1__chr13	5.48911	4.67269	0.339484	13.7641	4.19105e-43	5.89598e-42
Fcrls__chr3	1.11046	4.67188	0.827381	5.64659	1.63661e-08	4.16971e-08
Ccar1__chr10	2.76612	4.67101	0.35781	13.0544	5.99654e-39	6.98862e-38
Nagk__chr6	1.75708	4.67076	0.3809	12.2624	1.44105e-34	1.39084e-33
Hnrnpul2__chr19	2.00126	4.67047	0.353037	13.2294	5.93399e-40	7.16752e-39
Csnk1a1__chr18	3.17815	4.66914	0.354181	13.1829	1.10042e-39	1.31801e-38
Dek__chr13	1.70083	4.6682	0.428953	10.8828	1.39234e-27	9.85207e-27
Gatad2a__chr8	1.93277	4.66735	0.368983	12.6492	1.1302e-36	1.18808e-35
Slfn2__chr11	1.59196	4.66668	0.464682	10.0427	9.89024e-24	5.83958e-23
Lrrfip1__chr1	2.62149	4.66459	0.341027	13.6781	1.37299e-42	1.89416e-41
Abi1__chr2	1.60302	4.6643	0.419137	11.1283	9.13157e-29	6.83072e-28
Magt1__chrX	2.46121	4.66377	0.307043	15.1893	4.16282e-52	8.32855e-51
St13__chr15	1.72798	4.66328	0.36066	12.9298	3.05445e-38	3.45533e-37
Rgs19__chr2	1.21514	4.66212	0.494608	9.42589	4.26467e-21	2.21785e-20
Vcp__chr4	9.32481	4.66128	0.240109	19.4132	5.9731e-84	3.87301e-82
Map1b__chr13	3.15442	4.66025	0.558102	8.35017	6.81659e-17	2.88714e-16
Abhd12__chr2	1.65769	4.65953	0.36849	12.6449	1.1936e-36	1.25013e-35
Dstn__chr2	5.78189	4.65863	0.314472	14.8141	1.18709e-49	2.1517e-48
Sec11c__chr18	1.85433	4.65857	0.364946	12.7651	2.56844e-37	2.77988e-36
Arhgef2__chr3	1.7346	4.65819	0.384066	12.1286	7.45143e-34	6.97014e-33
Lamb1__chr12	2.06049	4.657	0.436955	10.6578	1.60274e-26	1.08459e-25
2700094K13Rik__chr2	1.47543	4.65585	0.444915	10.4646	1.25644e-25	8.14684e-25
Pold4__chr19	1.29074	4.65551	0.544791	8.54549	1.27987e-17	5.65244e-17
Sh3glb1__chr3	8.47742	4.65471	0.307482	15.1382	9.0726e-52	1.79253e-50
Rcc2__chr4	1.52497	4.65328	0.439803	10.5804	3.67536e-26	2.43742e-25
Ube2q1__chr3	1.86773	4.65327	0.389892	11.9348	7.79616e-33	6.97255e-32
Ccl3__chr11	1.27464	4.65325	0.843585	5.51605	3.46709e-08	8.64802e-08
Fgr__chr4	1.20025	4.65258	0.576244	8.07397	6.80499e-16	2.72754e-15
Glrx3__chr7	2.49067	4.65246	0.359602	12.9378	2.75352e-38	3.11986e-37
Klf2__chr8	2.8977	4.65246	0.447067	10.4066	2.31272e-25	1.48274e-24
Dpep2__chr8	1.16864	4.65216	0.801557	5.80391	6.4786e-09	1.69666e-08
Ubqln1__chr13	1.72141	4.6518	0.398301	11.6791	1.6297e-31	1.38379e-30
Rab11b__chr17	4.08473	4.6516	0.309154	15.0462	3.65523e-51	7.09413e-50
Zfp91__chr19	3.80241	4.65159	0.3364	13.8276	1.7381e-43	2.49688e-42
1500012F01Rik__chr2	1.44905	4.65142	0.457922	10.1577	3.06338e-24	1.85874e-23
Mical2__chr7	1.77463	4.65079	0.412417	11.2769	1.70681e-29	1.3168e-28
Ccdc50__chr16	1.49556	4.64921	0.408437	11.3829	5.08548e-30	4.03473e-29
Slc7a8__chr14	1.10876	4.64859	0.600574	7.74025	9.922e-15	3.70517e-14
Mvp__chr7	1.96166	4.64818	0.400478	11.6066	3.81559e-31	3.17003e-30
Rasa3__chr8	1.3796	4.64741	0.493284	9.42137	4.45259e-21	2.31136e-20
Cfdp1__chr8	1.88969	4.64693	0.326993	14.2111	7.81792e-46	1.22687e-44
Galnt2__chr8	2.19695	4.64691	0.375734	12.3675	3.91683e-35	3.86134e-34
Sept7__chr9	5.36589	4.64678	0.316966	14.6602	1.15994e-48	2.03274e-47
Pip5k1c__chr10	2.00399	4.64652	0.354933	13.0913	3.69403e-39	4.3478e-38
Mll5__chr5	3.04676	4.64534	0.330037	14.0752	5.39509e-45	8.23994e-44
Srrt__chr5	1.95076	4.64517	0.31244	14.8674	5.36757e-50	9.87979e-49
Dad1__chr14	3.44133	4.64475	0.272956	17.0165	6.19743e-65	2.04172e-63
Clint1__chr11	1.72742	4.64323	0.366188	12.6799	7.6433e-37	8.09441e-36
Sash1__chr10	1.55578	4.64274	0.453529	10.2369	1.35463e-24	8.38708e-24
H19__chr7	1.5618	4.64242	0.372808	12.4526	1.35391e-35	1.3582e-34
Scaf11__chr15	2.11483	4.6421	0.366156	12.6779	7.83686e-37	8.29323e-36
Cyp1b1__chr17	1.11178	4.64153	0.923031	5.02857	4.94159e-07	1.14063e-06
Arf3__chr15	1.72693	4.64113	0.427463	10.8574	1.83908e-27	1.29298e-26
Scand1__chr2	1.84497	4.64063	0.379891	12.2157	2.56361e-34	2.44942e-33
Ctdnep1__chr11	2.23762	4.64039	0.32484	14.2852	2.7073e-46	4.31505e-45
Sirt2__chr7	2.58859	4.6403	0.373101	12.4371	1.64307e-35	1.64364e-34
S100a13__chr3	2.01399	4.64007	0.371546	12.4885	8.62221e-36	8.72311e-35
Sae1__chr7	1.73948	4.63877	0.382257	12.1352	6.87303e-34	6.44177e-33
Srpx2__chrX	1.09412	4.63821	0.616922	7.51831	5.54875e-14	1.99227e-13
Nadk__chr4	1.627	4.638	0.448355	10.3445	4.43321e-25	2.80318e-24
Clptm1l__chr13	1.93982	4.63683	0.343325	13.5057	1.44798e-41	1.91401e-40
Sepn1__chr4	1.40373	4.6361	0.407361	11.3808	5.2104e-30	4.13154e-29
Cmtm7__chr9	1.35343	4.63539	0.463007	10.0115	1.3569e-23	7.96879e-23
Csnk2b__chr17	2.77408	4.6349	0.33022	14.0358	9.41495e-45	1.42725e-43
Flot2__chr11	1.73894	4.63424	0.431404	10.7422	6.44728e-27	4.42591e-26
Bnip2__chr9	3.12111	4.63394	0.339807	13.6369	2.41464e-42	3.28986e-41
Mapk6__chr9	1.7549	4.63391	0.398071	11.6409	2.55275e-31	2.1408e-30
Minos1__chr4	6.01947	4.63377	0.272174	17.025	5.35633e-65	1.7687e-63
Cyb5__chr18	1.98464	4.63312	0.343835	13.4748	2.20008e-41	2.86351e-40
Rbm39__chr2	4.12963	4.63284	0.31117	14.8884	3.91947e-50	7.2612e-49
Skp1a__chr11	2.84745	4.63169	0.332971	13.9102	5.49252e-44	8.0774e-43
Sept9__chr11	1.34718	4.62996	0.42359	10.9303	8.26e-28	5.89439e-27
Sh3gl1__chr17	1.30074	4.62973	0.435395	10.6334	2.08374e-26	1.4021e-25
Dnmt1__chr9	1.17448	4.62938	0.472266	9.8025	1.09833e-22	6.14421e-22
Bak1__chr17	1.5324	4.62842	0.454611	10.1811	2.40906e-24	1.47238e-23
Gadd45g__chr13	1.57046	4.62647	0.477344	9.69212	3.25691e-22	1.78554e-21
Tes__chr6	1.22096	4.62473	0.581487	7.95328	1.81637e-15	7.08714e-15
Lman2__chr13	2.46491	4.62421	0.308803	14.9746	1.07612e-50	2.04406e-49
Rras__chr7	4.14366	4.62299	0.444598	10.3981	2.52805e-25	1.61788e-24
Bnip3__chr7	4.11266	4.6217	0.350965	13.1685	1.33151e-39	1.58945e-38
Pafah1b1__chr11	4.02056	4.62157	0.306543	15.0764	2.31592e-51	4.51937e-50
Kif3a__chr11	2.57533	4.62073	0.456952	10.1121	4.88453e-24	2.92396e-23
Trim8__chr19	1.78962	4.62017	0.357088	12.9384	2.73106e-38	3.09687e-37
Tmem123__chr9	2.05344	4.61976	0.401625	11.5027	1.27909e-30	1.04145e-29
Ccnb2__chr9	1.13461	4.61963	0.689992	6.69519	2.15395e-11	6.62342e-11
H2afj__chr6	1.79458	4.61939	0.359881	12.8359	1.03215e-37	1.13345e-36
Lig1__chr7	1.21676	4.61852	0.513441	8.99524	2.35726e-19	1.13603e-18
Sh3pxd2b__chr11	1.10639	4.61827	0.53528	8.62776	6.25647e-18	2.81187e-17
Ak2__chr4	1.92804	4.61797	0.356645	12.9484	2.39916e-38	2.73136e-37
Bin2__chr15	1.29845	4.61785	0.630165	7.32801	2.33601e-13	8.05102e-13
Bst2__chr8	1.57809	4.6174	0.463468	9.96271	2.21922e-23	1.28531e-22
Usp7__chr16	2.06117	4.6168	0.361017	12.7883	1.90531e-37	2.07002e-36
Eef2__chr10	34.9237	4.61644	0.219704	21.0121	5.08646e-98	5.33518e-96
Sf3b4__chr3	1.36786	4.6164	0.405691	11.3791	5.31524e-30	4.20999e-29
Nus1__chr10	2.54032	4.61437	0.352077	13.1061	3.03766e-39	3.57822e-38
Sept8__chr11	1.43318	4.61375	0.378425	12.192	3.4292e-34	3.26117e-33
Csnk2a1__chr2	3.11698	4.6133	0.287658	16.0375	6.99505e-58	1.75677e-56
Cd48__chr1	1.12021	4.61312	0.624271	7.38961	1.47261e-13	5.15249e-13
Alyref__chr11	1.27716	4.61263	0.431577	10.6878	1.16035e-26	7.88958e-26
Mon2__chr10	1.35542	4.6121	0.452446	10.1937	2.11583e-24	1.29705e-23
Samd4b__chr7	1.66763	4.61063	0.399385	11.5443	7.88691e-31	6.4808e-30
Ubl3__chr5	3.40865	4.60964	0.378074	12.1924	3.41125e-34	3.24627e-33
Cenpa__chr5	1.87151	4.60926	0.493825	9.33379	1.02151e-20	5.23224e-20
Ccnd1__chr7	3.16225	4.6092	0.470905	9.78796	1.26835e-22	7.07585e-22
Psmd6__chr14	1.98246	4.60901	0.37686	12.23	2.14845e-34	2.06104e-33
Sltm__chr9	1.84385	4.60873	0.374412	12.3092	8.07722e-35	7.87032e-34
Nsfl1c__chr2	1.88395	4.60868	0.367308	12.5472	4.11974e-36	4.23096e-35
Rab3il1__chr19	1.12363	4.60851	0.581161	7.92983	2.19443e-15	8.50872e-15
Spcs3__chr8	1.91397	4.60762	0.407974	11.2939	1.40632e-29	1.09266e-28
Psmc5__chr11	2.42253	4.60725	0.362426	12.7122	5.0572e-37	5.40787e-36
Zc3h15__chr2	1.71864	4.60685	0.390432	11.7994	3.93314e-32	3.41902e-31
Tk1__chr11	1.08681	4.60615	0.611326	7.53469	4.89509e-14	1.76201e-13
Rars__chr11	2.08778	4.60564	0.429119	10.7328	7.14034e-27	4.89226e-26
Ankrd1__chr19	23.7536	4.60497	0.308734	14.9157	2.60694e-50	4.88032e-49
Bloc1s1__chr10	2.55529	4.60441	0.336312	13.6909	1.15087e-42	1.59236e-41
Mrps21__chr3	2.63293	4.60361	0.313697	14.6753	9.27593e-49	1.63158e-47
Dennd5a__chr7	2.96488	4.60332	0.346705	13.2773	3.13334e-40	3.83337e-39
Stt3b__chr9	2.87121	4.60285	0.296492	15.5244	2.37377e-54	5.28266e-53
Psmd13__chr7	2.20019	4.60266	0.314578	14.6312	1.77525e-48	3.09206e-47
Myo9b__chr8	1.27938	4.60246	0.429523	10.7153	8.62801e-27	5.88892e-26
Incenp__chr19	1.18073	4.60212	0.661444	6.95769	3.45897e-12	1.11031e-11
Prkacb__chr3	2.27459	4.60065	0.345043	13.3336	1.47657e-40	1.84119e-39
Ganab__chr19	1.82733	4.599	0.344114	13.3648	9.71459e-41	1.22745e-39
Anln__chr9	0.979167	4.5982	0.797127	5.76847	7.99944e-09	2.08044e-08
Uchl1__chr5	2.15917	4.59806	0.685465	6.70794	1.97386e-11	6.08408e-11
Pin1__chr9	1.80531	4.59765	0.392512	11.7134	1.08848e-31	9.31441e-31
March5__chr19	2.34792	4.5976	0.361417	12.721	4.5187e-37	4.84292e-36
Zfand5__chr19	3.06019	4.59712	0.308229	14.9146	2.64695e-50	4.94873e-49
Rock2__chr12	4.37427	4.5961	0.29903	15.3701	2.59952e-53	5.43727e-52
Ndel1__chr11	2.2835	4.59606	0.376896	12.1945	3.32548e-34	3.16675e-33
Prpf38b__chr3	1.53156	4.59572	0.370951	12.389	2.99701e-35	2.96297e-34
Golph3__chr15	1.77543	4.59561	0.40512	11.3438	7.95751e-30	6.25421e-29
Fkbp5__chr17	1.04311	4.59552	0.552896	8.31173	9.43136e-17	3.95585e-16
Tnrc6a__chr7	2.19559	4.59492	0.35576	12.9158	3.66613e-38	4.13091e-37
Gcsh__chr8	2.417	4.59469	0.402601	11.4125	3.62085e-30	2.89526e-29
Mcm6__chr1	1.06999	4.59445	0.528939	8.68617	3.7487e-18	1.70249e-17
Pole4__chr6	1.68304	4.59265	0.431571	10.6417	1.90638e-26	1.28518e-25
Fam105a__chr15	1.16366	4.59245	0.627994	7.31289	2.61459e-13	8.99158e-13
Cdca3__chr6	1.00097	4.59237	0.736223	6.23774	4.43942e-10	1.25577e-09
Tceal8__chrX	1.42862	4.5921	0.471873	9.73164	2.20998e-22	1.22144e-21
Atp5g2__chr15	10.3978	4.59127	0.267722	17.1494	6.35322e-66	2.17857e-64
Paip2__chr18	3.31961	4.5906	0.327296	14.0258	1.08335e-44	1.63881e-43
Pkig__chr2	2.82875	4.5901	0.380802	12.0537	1.85323e-33	1.69573e-32
Adrm1__chr2	1.91067	4.58998	0.344488	13.324	1.67764e-40	2.08645e-39
Lst1__chr17	1.26977	4.5897	0.57359	8.00171	1.22699e-15	4.83241e-15
Cyb5b__chr8	1.76665	4.58868	0.381037	12.0426	2.12124e-33	1.93847e-32
Fkbp2__chr19	1.81675	4.58772	0.342679	13.3878	7.12462e-41	9.05011e-40
Pycard__chr7	1.18121	4.58606	0.574407	7.98398	1.41687e-15	5.56948e-15
Slirp__chr12	2.08008	4.58584	0.373886	12.2653	1.39019e-34	1.34356e-33
Hist1h2bc__chr13	2.16125	4.58554	0.402142	11.4028	4.05024e-30	3.22775e-29
Asap1__chr15	1.37229	4.58511	0.425554	10.7745	4.5447e-27	3.141e-26
Nrp2__chr1	2.05955	4.58436	0.465966	9.8384	7.69277e-23	4.35466e-22
Ankrd13a__chr5	1.62554	4.58415	0.419853	10.9185	9.40754e-28	6.68986e-27
Cd97__chr8	1.75303	4.5835	0.421774	10.8672	1.65222e-27	1.1662e-26
Psmd3__chr11	2.37174	4.58311	0.324384	14.1287	2.52944e-45	3.90503e-44
Adam9__chr8	1.60699	4.58145	0.383699	11.9402	7.30357e-33	6.54431e-32
Adam15__chr3	2.61292	4.58119	0.436751	10.4892	9.68011e-26	6.32265e-25
Anapc5__chr5	3.40679	4.58106	0.287641	15.9263	4.16182e-57	1.02008e-55
Zfp703__chr8	1.3827	4.58079	0.526236	8.70482	3.18075e-18	1.45056e-17
Add1__chr5	2.53822	4.58071	0.313795	14.5978	2.90156e-48	4.99286e-47
Cox7a2__chr9	6.90822	4.58038	0.288331	15.8859	7.94095e-57	1.91671e-55
Spg21__chr9	1.24903	4.5801	0.430421	10.641	1.92088e-26	1.29435e-25
Prcp__chr7	1.09989	4.57953	0.535007	8.55976	1.13099e-17	5.01196e-17
Arhgef1__chr7	1.57534	4.5795	0.400033	11.4478	2.4114e-30	1.93795e-29
Dhrs3__chr4	3.86534	4.57887	0.320948	14.2667	3.52897e-46	5.61213e-45
Ubash3b__chr9	1.12432	4.57752	0.462535	9.8966	4.30666e-23	2.46428e-22
Tsc22d3__chrX	1.59529	4.577	0.430718	10.6264	2.24533e-26	1.50657e-25
Tgfbr1__chr4	1.39481	4.57691	0.462669	9.89241	4.49083e-23	2.5676e-22
Hras1__chr7	2.12508	4.57661	0.38649	11.8415	2.38271e-32	2.09165e-31
Cryab__chr9	57.493	4.57661	0.241651	18.9389	5.45264e-80	3.09888e-78
Acin1__chr14	1.79257	4.57633	0.33483	13.6676	1.58455e-42	2.17762e-41
Olfm1__chr2	1.19869	4.57559	0.556467	8.22257	1.99181e-16	8.20931e-16
Tacc3__chr5	1.01525	4.57532	0.636236	7.19123	6.42117e-13	2.15525e-12
Prpf40a__chr2	1.48951	4.57513	0.402032	11.38	5.25937e-30	4.16805e-29
Sumo1__chr1	2.1131	4.57453	0.39901	11.4647	1.98459e-30	1.60398e-29
Fuca1__chr4	1.33965	4.57423	0.379137	12.0648	1.61979e-33	1.48785e-32
Rab1b__chr19	3.49429	4.57416	0.309047	14.8008	1.44666e-49	2.61224e-48
Mob4__chr1	2.00859	4.57079	0.343747	13.297	2.41103e-40	2.97006e-39
Ssh2__chr11	3.12302	4.57064	0.329211	13.8836	7.96034e-44	1.16347e-42
Paics__chr5	3.72893	4.56821	0.294174	15.5289	2.20977e-54	4.93308e-53
D4Wsu53e__chr4	5.22663	4.56813	0.337665	13.5286	1.0601e-41	1.41463e-40
Canx__chr11	6.25092	4.56799	0.240128	19.0231	1.09758e-80	6.49668e-79
Chchd1__chr14	2.0128	4.56739	0.376749	12.1232	7.96131e-34	7.43247e-33
Gsk3b__chr16	2.26585	4.56693	0.337656	13.5254	1.10734e-41	1.47353e-40
Ppic__chr18	1.55443	4.56592	0.489683	9.32423	1.11788e-20	5.71563e-20
Elk3__chr10	2.60981	4.56517	0.422927	10.7942	3.66512e-27	2.54418e-26
S100a16__chr3	2.45617	4.56476	0.452088	10.0971	5.6915e-24	3.39704e-23
Flii__chr11	2.12591	4.56455	0.350132	13.0366	7.57125e-39	8.80227e-38
Ckap2l__chr2	1.03188	4.56443	0.796806	5.72841	1.01377e-08	2.6184e-08
Atp5e__chr2	11.2514	4.56418	0.261547	17.4507	3.40065e-68	1.27659e-66
Tomm70a__chr16	1.59678	4.56385	0.396809	11.5014	1.29836e-30	1.05654e-29
Thoc2__chrX	2.07481	4.56381	0.362791	12.5797	2.73028e-36	2.82228e-35
Selk__chr14	2.51966	4.5626	0.30301	15.0576	3.07742e-51	5.98084e-50
Hars__chr18	1.38891	4.56251	0.405413	11.254	2.21374e-29	1.69871e-28
Ddx17__chr15	2.31789	4.56215	0.341812	13.347	1.23366e-40	1.54777e-39
Vars__chr17	1.47084	4.56148	0.429777	10.6136	2.57602e-26	1.72117e-25
Med13l__chr5	1.56259	4.56113	0.401378	11.3637	6.34087e-30	5.00567e-29
Srrm1__chr4	2.38422	4.56045	0.35216	12.9499	2.35166e-38	2.67943e-37
Ccl4__chr11	1.37547	4.55946	0.720147	6.33129	2.43118e-10	7.00056e-10
Kars__chr8	2.06253	4.55815	0.364115	12.5184	5.91867e-36	6.0221e-35
Dpysl2__chr14	1.77855	4.55757	0.424177	10.7445	6.29084e-27	4.32268e-26
Ypel5__chr17	2.04145	4.55709	0.410676	11.0966	1.30342e-28	9.68905e-28
Timm17a__chr1	3.62247	4.55668	0.33554	13.5801	5.25378e-42	7.05034e-41
Comt__chr16	4.14413	4.55558	0.276775	16.4595	7.16788e-61	2.07403e-59
Erp44__chr4	1.86199	4.55463	0.315741	14.4252	3.59329e-47	5.91214e-46
Cenpf__chr1	1.27607	4.55452	0.651826	6.98733	2.80169e-12	9.0544e-12
Ap2a2__chr7	1.77009	4.55396	0.337248	13.5033	1.49527e-41	1.97318e-40
2610001J05Rik__chr6	1.74575	4.55371	0.413541	11.0115	3.36403e-28	2.44961e-27
Pdcd6__chr13	1.36837	4.55364	0.411059	11.0778	1.6072e-28	1.18607e-27
H2afv__chr11	1.56146	4.5536	0.391027	11.6452	2.42628e-31	2.03794e-30
Adam17__chr12	1.53458	4.55174	0.397767	11.4432	2.54222e-30	2.04193e-29
Ifi27l1__chr12	1.57872	4.55152	0.438038	10.3907	2.73369e-25	1.74636e-24
Mrps24__chr11	2.16674	4.55074	0.367289	12.3901	2.95706e-35	2.9273e-34
Cthrc1__chr15	0.993586	4.55065	0.851228	5.34598	8.99274e-08	2.18277e-07
Ms4a6b__chr19	1.0703	4.55009	0.723153	6.29202	3.13367e-10	8.97806e-10
Cyb5r4__chr9	1.72786	4.54746	0.412279	11.0301	2.73705e-28	1.99918e-27
Puf60__chr15	2.37046	4.54715	0.338336	13.4397	3.53661e-41	4.55322e-40
H2afx__chr9	1.05416	4.54652	0.609616	7.45801	8.78384e-14	3.11618e-13
Hsp90ab1__chr17	28.922	4.54599	0.205768	22.0928	3.70935e-108	5.94537e-106
Ext1__chr15	1.74889	4.54495	0.402855	11.2818	1.61324e-29	1.24731e-28
Nek6__chr2	1.17975	4.54492	0.465455	9.76447	1.59939e-22	8.89137e-22
Coa3__chr11	2.22008	4.54473	0.360231	12.6162	1.72009e-36	1.78972e-35
Sar1a__chr10	3.34574	4.54465	0.290547	15.6417	3.78472e-55	8.67992e-54
Ppp1r15a__chr7	2.0064	4.54276	0.452624	10.0365	1.05331e-23	6.214e-23
Tmem176a__chr6	1.2436	4.54231	0.533839	8.50877	1.75788e-17	7.711e-17
Romo1__chr2	2.76454	4.5418	0.316988	14.328	1.4635e-46	2.36003e-45
Nucb1__chr7	3.10741	4.54066	0.277565	16.3589	3.75986e-60	1.05166e-58
Dpp9__chr17	2.11457	4.54049	0.373323	12.1624	4.93111e-34	4.65227e-33
Fam104a__chr11	1.56494	4.54031	0.389324	11.662	1.99251e-31	1.68129e-30
Tgif1__chr17	1.14424	4.53942	0.530493	8.55698	1.15867e-17	5.13144e-17
Ppp2r5c__chr12	3.35618	4.53913	0.339432	13.3727	8.72901e-41	1.10586e-39
Hspb2__chr9	2.1845	4.53823	0.672893	6.74436	1.53701e-11	4.75813e-11
Gtf2h5__chr17	1.72076	4.53771	0.354529	12.7993	1.65479e-37	1.80333e-36
Ik__chr18	2.54414	4.53688	0.351427	12.9099	3.958e-38	4.45274e-37
Cdk9__chr2	1.37796	4.53664	0.399732	11.3492	7.48423e-30	5.89848e-29
Trp53__chr11	1.17422	4.53658	0.446412	10.1623	2.92052e-24	1.77432e-23
Ergic1__chr17	1.42156	4.53641	0.367542	12.3426	5.34337e-35	5.23994e-34
Evi2a__chr11	0.97267	4.53618	0.671899	6.75128	1.46541e-11	4.53944e-11
Dnm2__chr9	1.96706	4.53617	0.360789	12.5729	2.9747e-36	3.06827e-35
Son__chr16	8.5086	4.536	0.290544	15.6121	6.0228e-55	1.37026e-53
Ptprj__chr2	1.05984	4.53575	0.587339	7.72253	1.14043e-14	4.25423e-14
Tnfaip2__chr12	1.78336	4.53476	0.380647	11.9133	1.00902e-32	9.00164e-32
6820431F20Rik__chr8	4.10633	4.5342	0.330758	13.7085	9.02862e-43	1.25164e-41
Ogfrl1__chr1	1.69837	4.53412	0.42674	10.625	2.28008e-26	1.52773e-25
Tpr__chr1	2.64262	4.53298	0.338701	13.3834	7.5558e-41	9.58928e-40
Clec12a__chr6	1.06209	4.5328	0.690987	6.5599	5.3844e-11	1.61261e-10
D15Ertd621e__chr15	1.26867	4.53257	0.466359	9.71907	2.50067e-22	1.37889e-21
Cab39__chr1	2.04835	4.53137	0.352571	12.8524	8.34275e-38	9.19701e-37
Clec4a1__chr6	1.09507	4.53115	0.798077	5.67759	1.36605e-08	3.50166e-08
Snapin__chr3	2.32847	4.52985	0.407314	11.1213	9.88493e-29	7.37492e-28
Polr2m__chr9	5.99854	4.52911	0.304558	14.8711	5.07896e-50	9.36064e-49
Dnajc5__chr2	2.37074	4.52868	0.33312	13.5948	4.30163e-42	5.78893e-41
Fam89b__chr19	1.2059	4.52867	0.46751	9.68678	3.43164e-22	1.87917e-21
9530068E07Rik__chr11	1.63409	4.52811	0.35731	12.6728	8.36953e-37	8.85036e-36
Acsl5__chr19	1.40679	4.52693	0.477125	9.48792	2.35684e-21	1.24198e-20
Ncaph2__chr15	1.53522	4.52666	0.394392	11.4776	1.71051e-30	1.38481e-29
Snrnp70__chr7	1.65048	4.52648	0.356066	12.7125	5.04086e-37	5.39444e-36
Arhgap30__chr1	1.1442	4.52537	0.605242	7.47695	7.60662e-14	2.70865e-13
Tlr2__chr3	1.01078	4.5245	0.802051	5.64116	1.68904e-08	4.29945e-08
Snd1__chr6	1.42034	4.52448	0.354387	12.7671	2.50368e-37	2.71185e-36
Xdh__chr17	1.99891	4.52448	0.45827	9.87294	5.45416e-23	3.11214e-22
Lamtor4__chr5	1.65413	4.52356	0.414792	10.9056	1.08377e-27	7.69153e-27
Rpl7l1__chr17	1.49185	4.52345	0.344156	13.1436	1.85233e-39	2.20379e-38
Gng2__chr14	1.12497	4.5204	0.550738	8.20789	2.25101e-16	9.2618e-16
Selm__chr11	1.72781	4.5193	0.444646	10.1638	2.87594e-24	1.74873e-23
Lars2__chr9	36.6718	4.51923	0.197146	22.9232	2.72501e-116	6.1702e-114
Rab18__chr18	2.26583	4.51904	0.379384	11.9115	1.03072e-32	9.18954e-32
Trim47__chr11	1.43082	4.519	0.451777	10.0027	1.48241e-23	8.68087e-23
Tapbp__chr17	2.26898	4.51837	0.331924	13.6127	3.36716e-42	4.55285e-41
Sgk1__chr10	2.88535	4.51836	0.429471	10.5208	6.93097e-26	4.55413e-25
Clic4__chr4	8.67993	4.51767	0.299392	15.0895	1.89818e-51	3.71943e-50
Tbrg1__chr9	1.43711	4.51621	0.421775	10.7076	9.37393e-27	6.38887e-26
Hnrnph2__chrX	1.67949	4.5159	0.36019	12.5375	4.65198e-36	4.75702e-35
Zfp36l1__chr12	5.81337	4.51491	0.364317	12.3928	2.85829e-35	2.83149e-34
Fnbp1__chr2	1.65103	4.51446	0.429378	10.514	7.45018e-26	4.88854e-25
Pcnp__chr16	1.91315	4.51432	0.397846	11.3469	7.68521e-30	6.05019e-29
Mtmr6__chr14	1.87708	4.51426	0.376182	12.0002	3.54447e-33	3.21028e-32
Ola1__chr2	1.49505	4.51366	0.385791	11.6997	1.27837e-31	1.09132e-30
Dgkz__chr2	1.65347	4.51337	0.382931	11.7864	4.58971e-32	3.98008e-31
Hcfc1__chrX	1.69493	4.51264	0.359921	12.5379	4.63293e-36	4.74279e-35
C1qbp__chr11	1.94725	4.5117	0.341817	13.1992	8.86904e-40	1.06855e-38
Phf5a__chr15	1.67817	4.51124	0.385482	11.7029	1.23243e-31	1.05273e-30
Lima1__chr15	1.50817	4.51123	0.427774	10.5458	5.31054e-26	3.50069e-25
1110008P14Rik__chr2	1.78058	4.50991	0.442236	10.198	2.02461e-24	1.24166e-23
Aspm__chr1	0.923792	4.50942	0.956175	4.71611	2.40397e-06	5.26121e-06
Psmc3__chr2	3.40723	4.50862	0.294658	15.3012	7.5056e-53	1.54054e-51
Rragc__chr4	1.97436	4.50769	0.361743	12.461	1.2178e-35	1.22251e-34
Mbd1__chr18	1.3839	4.50667	0.508656	8.85996	8.00448e-19	3.75235e-18
B4galnt1__chr10	1.1336	4.50665	0.541875	8.31677	9.03892e-17	3.79794e-16
5031439G07Rik__chr15	1.083	4.50636	0.532066	8.46954	2.46355e-17	1.06979e-16
Lamtor3__chr3	2.31447	4.5057	0.317755	14.1798	1.22212e-45	1.90531e-44
Cks1b__chr3	1.02577	4.50557	0.603796	7.46207	8.51713e-14	3.02608e-13
Fgfr1__chr8	1.19316	4.50557	0.61055	7.37953	1.58851e-13	5.54714e-13
Rassf1__chr9	1.10166	4.50448	0.504861	8.92222	4.57048e-19	2.17254e-18
Psmc6__chr14	2.80137	4.50412	0.373442	12.0611	1.69514e-33	1.55406e-32
Eif1__chr11	32.9176	4.50391	0.234769	19.1844	4.99302e-82	3.09676e-80
Rab4b__chr7	1.31216	4.50357	0.406633	11.0753	1.65388e-28	1.21863e-27
Ankrd11__chr8	2.01341	4.50302	0.350562	12.8452	9.15519e-38	1.00771e-36
Lman1__chr18	2.04769	4.50265	0.324891	13.859	1.12298e-43	1.62797e-42
Larp7__chr3	1.45117	4.50259	0.380423	11.8357	2.55129e-32	2.23551e-31
Zdhhc20__chr14	1.29245	4.5024	0.418174	10.7668	4.93807e-27	3.41121e-26
Vbp1__chrX	1.73451	4.50067	0.380306	11.8343	2.59374e-32	2.27131e-31
Tcerg1__chr18	1.31824	4.50042	0.431897	10.4201	2.00691e-25	1.28957e-24
Ddx6__chr9	2.77127	4.4999	0.338769	13.2831	2.90106e-40	3.5553e-39
Mrps36__chr13	2.63123	4.49865	0.351775	12.7884	1.90344e-37	2.06955e-36
Il10rb__chr16	2.3876	4.49823	0.325637	13.8136	2.11013e-43	3.01916e-42
Fkbp10__chr11	1.12175	4.49822	0.565359	7.95639	1.77133e-15	6.91666e-15
Tiparp__chr3	1.20138	4.4981	0.534827	8.41039	4.08649e-17	1.75584e-16
Itga5__chr15	1.01161	4.4957	0.533068	8.43364	3.35088e-17	1.44499e-16
Ap3s1__chr18	1.08705	4.49434	0.491865	9.13735	6.40022e-20	3.16681e-19
Mia3__chr1	2.34465	4.49409	0.333089	13.4922	1.73886e-41	2.28406e-40
Hsd17b12__chr2	1.24418	4.4934	0.406807	11.0455	2.30454e-28	1.68759e-27
Pafah1b2__chr9	1.62509	4.49337	0.412917	10.882	1.40427e-27	9.93152e-27
Tns3__chr11	1.36679	4.4932	0.432397	10.3914	2.7137e-25	1.73436e-24
Itpripl2__chr7	1.39659	4.49159	0.446629	10.0567	8.58677e-24	5.08892e-23
Naa60__chr16	1.53845	4.49114	0.369832	12.1437	6.19296e-34	5.82351e-33
AI662270__chr11	1.00006	4.49095	0.67098	6.69312	2.18462e-11	6.71339e-11
Ubald1__chr16	1.38773	4.49049	0.36109	12.4359	1.66769e-35	1.66711e-34
Elovl1__chr4	1.4085	4.49046	0.409117	10.976	4.98719e-28	3.59304e-27
Gas7__chr11	0.990987	4.49027	0.542085	8.28333	1.19774e-16	4.98853e-16
Aspscr1__chr11	1.57341	4.48985	0.554848	8.09204	5.86746e-16	2.36105e-15
Snx17__chr5	1.64841	4.48916	0.38578	11.6366	2.686e-31	2.2499e-30
Sqstm1__chr11	6.49643	4.4886	0.254918	17.608	2.1377e-69	8.30907e-68
Sec24d__chr3	1.2554	4.48611	0.432801	10.3653	3.56611e-25	2.26192e-24
Vps28__chr15	2.00952	4.48566	0.347805	12.8971	4.67542e-38	5.23507e-37
Mafg__chr11	1.47338	4.48539	0.410487	10.927	8.56284e-28	6.10745e-27
Inpp5a__chr7	3.73235	4.48535	0.442666	10.1326	3.96004e-24	2.38354e-23
Cpd__chr11	2.5754	4.48491	0.354618	12.6471	1.16012e-36	1.21864e-35
Kif23__chr9	0.964683	4.48483	0.828101	5.4158	6.10158e-08	1.49603e-07
Ncapd2__chr6	1.06062	4.48378	0.601186	7.45821	8.77037e-14	3.11217e-13
Hipk1__chr3	1.89797	4.48353	0.400787	11.1868	4.7314e-29	3.57108e-28
Kdelr1__chr7	2.36802	4.48316	0.314651	14.248	4.61101e-46	7.31659e-45
Skil__chr3	1.2442	4.48143	0.470555	9.52369	1.67131e-21	8.8728e-21
Sulf2__chr2	1.86118	4.48138	0.384479	11.6557	2.14543e-31	1.80772e-30
Wtap__chr17	1.60795	4.47937	0.387831	11.5498	7.39744e-31	6.08561e-30
Pros1__chr16	1.40307	4.4789	0.479647	9.33791	9.82556e-21	5.03816e-20
Tceb3__chr4	1.88167	4.47889	0.367972	12.1718	4.3909e-34	4.15635e-33
Gsk3a__chr7	2.05672	4.47883	0.315925	14.1769	1.27366e-45	1.98349e-44
Tial1__chr7	1.69615	4.47873	0.365448	12.2554	1.57111e-34	1.51227e-33
Txn2__chr15	5.30613	4.47848	0.300335	14.9116	2.7703e-50	5.1658e-49
Sec62__chr3	4.98652	4.47832	0.277199	16.1556	1.0371e-58	2.73968e-57
Srsf5__chr12	2.74822	4.4783	0.353558	12.6664	9.07807e-37	9.57831e-36
Ergic3__chr2	1.79811	4.47817	0.314328	14.2468	4.69312e-46	7.42211e-45
Unc5b__chr10	1.34541	4.47813	0.507245	8.82835	1.06235e-18	4.9395e-18
Rnf181__chr6	1.8032	4.47767	0.358156	12.502	7.27998e-36	7.39664e-35
Trappc1__chr11	1.37582	4.47756	0.38579	11.6062	3.83263e-31	3.18233e-30
Psmb10__chr8	2.2306	4.47715	0.40978	10.9257	8.68407e-28	6.19081e-27
Ythdf2__chr4	1.39982	4.47691	0.407717	10.9804	4.74659e-28	3.42836e-27
Lhfp__chr3	1.38335	4.47689	0.506925	8.83147	1.03313e-18	4.8052e-18
Sec11a__chr7	1.39265	4.47667	0.392304	11.4112	3.6749e-30	2.93683e-29
3110001D03Rik__chr4	1.56458	4.47665	0.412107	10.8628	1.73286e-27	1.2189e-26
Dbnl__chr11	1.3875	4.47632	0.414693	10.7943	3.66246e-27	2.54357e-26
Yy1__chr12	1.58896	4.47586	0.431063	10.3833	2.9536e-25	1.88347e-24
Mcm7__chr5	1.02135	4.4758	0.52551	8.51707	1.63641e-17	7.19141e-17
Creb1__chr1	1.19212	4.47572	0.48359	9.25521	2.13817e-20	1.07739e-19
Rbm25__chr12	3.79976	4.47557	0.298672	14.9849	9.21641e-51	1.76e-49
Cdc34__chr10	4.66966	4.47304	0.30838	14.5049	1.12735e-47	1.89642e-46
Uap1l1__chr2	1.11445	4.47294	0.53413	8.37425	5.55788e-17	2.36525e-16
Uggt1__chr1	1.63508	4.47188	0.339497	13.1721	1.27007e-39	1.51738e-38
Cox7c__chr13	2.84174	4.47185	0.358529	12.4728	1.05119e-35	1.05974e-34
Nsd1__chr13	1.95843	4.47173	0.396079	11.29	1.47012e-29	1.14037e-28
Rab31__chr17	1.35816	4.47135	0.451094	9.91223	3.68325e-23	2.11776e-22
Tmem165__chr5	1.32623	4.47048	0.460913	9.69917	3.03958e-22	1.66832e-21
Mapk1__chr16	1.69425	4.46908	0.341614	13.0823	4.15816e-39	4.87397e-38
Oat__chr7	2.98376	4.46882	0.321028	13.9203	4.76637e-44	7.03126e-43
Maea__chr5	2.1875	4.46874	0.331502	13.4803	2.04305e-41	2.67623e-40
Snx10__chr6	1.46016	4.46826	0.469069	9.5258	1.63772e-21	8.70098e-21
Dhx15__chr5	1.92167	4.46807	0.380313	11.7484	7.19765e-32	6.18894e-31
Mta2__chr19	1.32921	4.46804	0.389839	11.4612	2.06559e-30	1.66661e-29
Ahcy__chr2	0.998565	4.46687	0.47393	9.42517	4.29408e-21	2.23233e-20
Srsf10__chr4	1.81563	4.46673	0.394949	11.3096	1.17593e-29	9.17651e-29
Dlgap4__chr2	2.13337	4.46669	0.383564	11.6452	2.42724e-31	2.03794e-30
Aamp__chr1	2.80699	4.46648	0.334542	13.351	1.16799e-40	1.47056e-39
Fubp1__chr3	2.10029	4.46621	0.406339	10.9913	4.20636e-28	3.05052e-27
Milr1__chr11	1.00237	4.46593	0.614863	7.26329	3.77799e-13	1.29023e-12
Ap1s1__chr5	1.34247	4.46592	0.430198	10.3811	3.02387e-25	1.92484e-24
Aars__chr8	2.3637	4.46544	0.345744	12.9154	3.68343e-38	4.14712e-37
Tmem258__chr19	2.26007	4.46541	0.291667	15.31	6.5608e-53	1.35245e-51
Tsc22d4__chr5	3.33108	4.46453	0.304529	14.6604	1.15527e-48	2.02705e-47
Cd93__chr2	9.76994	4.46452	0.413111	10.8071	3.18631e-27	2.21937e-26
Nupr1__chr7	1.04237	4.46448	0.650269	6.86559	6.62166e-12	2.09163e-11
Rcbtb2__chr14	1.33378	4.46341	0.481449	9.27079	1.84765e-20	9.33642e-20
Arhgap1__chr2	1.47615	4.46317	0.401245	11.1233	9.6617e-29	7.21592e-28
Dnajb11__chr16	1.5958	4.4625	0.352903	12.6451	1.19083e-36	1.24814e-35
Ddx46__chr13	1.32145	4.46234	0.376818	11.8422	2.3629e-32	2.07554e-31
Mdm2__chr10	2.14626	4.46134	0.376822	11.8394	2.44233e-32	2.14136e-31
Pin4__chrX	1.49067	4.4608	0.424156	10.5169	7.22129e-26	4.74271e-25
Arfip1__chr3	1.56963	4.4606	0.376086	11.8606	1.89695e-32	1.67347e-31
Mknk2__chr10	1.70912	4.46031	0.341552	13.059	5.6488e-39	6.59412e-38
Kcmf1__chr6	3.32789	4.45989	0.335311	13.3008	2.29148e-40	2.83257e-39
Agfg1__chr1	1.22426	4.45967	0.43909	10.1566	3.09583e-24	1.87684e-23
Cpne3__chr4	1.57525	4.45911	0.439693	10.1414	3.61786e-24	2.18219e-23
Dnajc19__chr3	2.66909	4.45793	0.357526	12.4688	1.10418e-35	1.11159e-34
Exoc5__chr14	1.37759	4.4577	0.415466	10.7294	7.40804e-27	5.06838e-26
Slc37a2__chr9	1.05333	4.45733	0.598368	7.44915	9.39412e-14	3.32772e-13
Tax1bp1__chr6	2.40873	4.45671	0.338177	13.1786	1.16518e-39	1.39441e-38
Zfand3__chr17	1.89635	4.45664	0.386301	11.5367	8.61491e-31	7.07087e-30
Prrc1__chr18	1.38984	4.4565	0.405926	10.9786	4.84386e-28	3.49508e-27
Vav1__chr17	1.02932	4.45648	0.646076	6.89776	5.28296e-12	1.67993e-11
Sptlc2__chr12	1.23798	4.45592	0.427223	10.43	1.80965e-25	1.16492e-24
Polr2f__chr15	1.56949	4.45589	0.377366	11.8079	3.55383e-32	3.09307e-31
Ddx18__chr1	1.29714	4.45588	0.416761	10.6917	1.11298e-26	7.57473e-26
Atp7a__chrX	1.21255	4.45521	0.491359	9.06712	1.22201e-19	5.96984e-19
Parva__chr7	1.71102	4.45432	0.431339	10.3267	5.33485e-25	3.35841e-24
Pgls__chr8	1.72786	4.45358	0.373041	11.9386	7.44772e-33	6.66929e-32
Dnajc10__chr2	1.44582	4.45319	0.440216	10.1159	4.69677e-24	2.81392e-23
Nr1h2__chr7	1.99018	4.45311	0.356969	12.4748	1.02492e-35	1.03398e-34
Eif4e__chr3	2.61334	4.45254	0.295492	15.0682	2.62103e-51	5.10082e-50
Il17ra__chr6	1.09954	4.4519	0.531194	8.38094	5.25076e-17	2.23521e-16
Clec4e__chr6	1.13001	4.45093	0.953454	4.66821	3.03832e-06	6.58988e-06
Smc3__chr19	1.58055	4.4502	0.401822	11.0751	1.65782e-28	1.2209e-27
Sfrp1__chr8	1.18203	4.4501	0.648764	6.85935	6.91727e-12	2.18307e-11
Bbip1__chr19	1.78026	4.4493	0.452305	9.83694	7.80452e-23	4.41441e-22
Nasp__chr4	1.17245	4.44829	0.461056	9.64805	5.01012e-22	2.71644e-21
Smndc1__chr19	1.58467	4.44797	0.414407	10.7333	7.09765e-27	4.86535e-26
Spag7__chr11	2.36558	4.44794	0.314223	14.1554	1.73051e-45	2.68323e-44
Eif4g2__chr7	17.4424	4.44754	0.238912	18.6158	2.39106e-77	1.22253e-75
Lpxn__chr19	1.01316	4.44752	0.627521	7.08744	1.36615e-12	4.49865e-12
Mdfic__chr6	1.5903	4.44701	0.434724	10.2295	1.46285e-24	9.03359e-24
Lamp1__chr8	16.9345	4.44628	0.20236	21.9722	5.31572e-107	8.06688e-105
Eif3d__chr15	1.46953	4.44626	0.368143	12.0776	1.38789e-33	1.28061e-32
Uqcr10__chr11	6.31679	4.44599	0.289357	15.3651	2.80703e-53	5.84559e-52
Nes__chr3	1.68283	4.44571	0.551085	8.0672	7.19304e-16	2.87823e-15
Eif3g__chr9	2.16636	4.44535	0.352903	12.5965	2.20696e-36	2.28796e-35
C3__chr17	1.34018	4.44533	0.603391	7.36724	1.74198e-13	6.05344e-13
Snrpb2__chr2	1.1659	4.44495	0.41799	10.6341	2.06803e-26	1.39219e-25
Acsl4__chrX	1.13994	4.44429	0.451848	9.83581	7.89281e-23	4.46258e-22
Tspan14__chr14	1.16382	4.44395	0.519522	8.55393	1.1897e-17	5.26396e-17
Ccdc12__chr9	1.53354	4.44327	0.395559	11.2329	2.81185e-29	2.14727e-28
Pld3__chr7	1.46039	4.44285	0.377112	11.7812	4.87738e-32	4.21927e-31
Ube2j1__chr4	1.62985	4.44282	0.390882	11.3661	6.16586e-30	4.87291e-29
Ube2a__chrX	1.58702	4.44249	0.365082	12.1685	4.57655e-34	4.32347e-33
Lsm14a__chr7	2.14739	4.44123	0.3931	11.298	1.343e-29	1.04517e-28
Sla__chr15	0.976742	4.44071	0.64162	6.9211	4.4816e-12	1.43084e-11
Znhit1__chr5	1.84294	4.43996	0.452907	9.80324	1.09032e-22	6.10656e-22
Glrx5__chr12	2.98425	4.43986	0.301356	14.7329	3.96115e-49	7.05441e-48
Itga4__chr2	1.33362	4.43951	0.450079	9.86385	5.97177e-23	3.40205e-22
Cnppd1__chr1	1.16861	4.43929	0.415477	10.6848	1.19904e-26	8.14101e-26
Aurkaip1__chr4	2.14876	4.43914	0.306116	14.5015	1.18562e-47	1.9921e-46
Cebpa__chr7	1.00384	4.43909	0.709013	6.26095	3.82642e-10	1.08733e-09
Mat2a__chr6	3.79493	4.43886	0.330696	13.4228	4.4463e-41	5.70382e-40
Ccdc124__chr8	1.85295	4.43827	0.381152	11.6444	2.45128e-31	2.05691e-30
Leprot__chr4	1.58565	4.43684	0.382646	11.5952	4.36013e-31	3.60982e-30
Magoh__chr4	1.38341	4.43541	0.422101	10.5079	7.94297e-26	5.20232e-25
Nfkb1__chr3	1.36832	4.43397	0.402956	11.0036	3.67121e-28	2.67193e-27
Dnlz__chr2	1.90493	4.43364	0.468131	9.47095	2.77308e-21	1.45809e-20
Nol7__chr13	2.16325	4.43281	0.385813	11.4895	1.48912e-30	1.2097e-29
Ctnnd1__chr2	1.78109	4.43228	0.399597	11.0919	1.37385e-28	1.01914e-27
Sigmar1__chr4	1.19995	4.43217	0.443501	9.99359	1.62582e-23	9.49338e-23
Enah__chr1	2.87153	4.43144	0.681277	6.50461	7.78955e-11	2.31062e-10
Ptgs2__chr1	0.922802	4.43104	0.881059	5.02922	4.92488e-07	1.13734e-06
Snx4__chr16	1.49277	4.43095	0.432846	10.2368	1.35681e-24	8.39691e-24
Higd2a__chr13	2.85512	4.43087	0.335669	13.2001	8.75955e-40	1.05625e-38
Nipbl__chr15	2.25752	4.43061	0.395086	11.2143	3.46982e-29	2.64125e-28
Gps2__chr11	1.9708	4.43037	0.359774	12.3143	7.58519e-35	7.40101e-34
Gpx8__chr13	1.04723	4.42982	0.56429	7.85025	4.15201e-15	1.5828e-14
Cd37__chr7	0.997434	4.42881	0.61525	7.1984	6.09245e-13	2.04829e-12
Glipr2__chr4	1.0179	4.42881	0.538046	8.23129	1.85209e-16	7.64025e-16
Itsn1__chr16	1.41922	4.42792	0.395628	11.1921	4.45613e-29	3.37224e-28
Rnf19b__chr4	1.30327	4.42786	0.475327	9.31541	1.21483e-20	6.19131e-20
Gnaq__chr19	1.80612	4.42759	0.402507	11	3.81992e-28	2.77733e-27
Rasa1__chr13	1.39489	4.42717	0.409369	10.8146	2.93569e-27	2.0478e-26
Rap1gds1__chr3	1.38802	4.42695	0.374161	11.8317	2.67751e-32	2.3418e-31
Adss__chr1	1.08579	4.42617	0.526553	8.40594	4.2446e-17	1.82158e-16
Ptpra__chr2	1.49465	4.42523	0.395924	11.177	5.28638e-29	3.98364e-28
Smc1a__chrX	1.92681	4.42518	0.350642	12.6202	1.63384e-36	1.70122e-35
Ipo5__chr14	2.18049	4.42501	0.331826	13.3353	1.442e-40	1.80124e-39
Tsc22d1__chr14	6.60655	4.42494	0.337346	13.1169	2.63437e-39	3.1083e-38
Fam102b__chr3	1.16489	4.42463	0.476979	9.27637	1.75345e-20	8.87301e-20
Thy1__chr9	1.08689	4.4245	0.494142	8.95391	3.43101e-19	1.63964e-18
Preb__chr5	1.5802	4.42386	0.374796	11.8034	3.74919e-32	3.26111e-31
Ryk__chr9	1.88543	4.4231	0.457321	9.67176	3.9748e-22	2.16662e-21
Cd300lf__chr11	1.40366	4.42285	0.617448	7.16311	7.88687e-13	2.63789e-12
Nisch__chr14	2.87325	4.42206	0.304423	14.526	8.29188e-48	1.39981e-46
Pdcl3__chr1	1.94548	4.42151	0.44267	9.98829	1.71523e-23	1.00032e-22
Spc24__chr9	0.981578	4.42073	0.582672	7.58699	3.27418e-14	1.19088e-13
Atp6v1c1__chr15	1.75238	4.42033	0.388036	11.3915	4.60759e-30	3.66373e-29
Mea1__chr17	1.35049	4.42023	0.401976	10.9962	3.98371e-28	2.89494e-27
Hck__chr2	1.0346	4.41962	0.706707	6.25382	4.0053e-10	1.1359e-09
Cenpb__chr2	5.63691	4.41878	0.299121	14.7726	2.20193e-49	3.951e-48
Sec63__chr10	1.54868	4.41813	0.338463	13.0535	6.06812e-39	7.06626e-38
Alcam__chr16	1.05198	4.41776	0.594408	7.4322	1.06806e-13	3.76937e-13
Ctps__chr4	1.87224	4.41716	0.424362	10.4089	2.25747e-25	1.44797e-24
Abcf1__chr17	2.35422	4.4171	0.312462	14.1364	2.26527e-45	3.50098e-44
Rps6kb1__chr11	2.0923	4.41701	0.339921	12.9942	1.31905e-38	1.51989e-37
Cyp4f18__chr8	1.15112	4.41545	0.707089	6.24455	4.25035e-10	1.20324e-09
Polr2e__chr10	2.03317	4.41424	0.324672	13.596	4.23097e-42	5.69923e-41
Mrps14__chr1	1.9722	4.41414	0.380519	11.6003	4.10512e-31	3.40264e-30
Uba5__chr9	1.64449	4.41389	0.386	11.4349	2.79698e-30	2.24277e-29
Irf2__chr8	1.59439	4.41327	0.426488	10.3479	4.27655e-25	2.70532e-24
Cops5__chr1	1.77169	4.41311	0.366209	12.0508	1.92065e-33	1.75629e-32
Lamtor2__chr3	1.37543	4.41292	0.416806	10.5875	3.40672e-26	2.26243e-25
Stra13__chr11	1.62561	4.41257	0.39098	11.2859	1.54001e-29	1.19199e-28
Ppdpf__chr2	1.8328	4.41187	0.376297	11.7244	9.5521e-32	8.19367e-31
BC031181__chr18	1.83548	4.41157	0.331299	13.316	1.86894e-40	2.31628e-39
Thoc7__chr14	1.93483	4.41155	0.369707	11.9325	8.00875e-33	7.1582e-32
Kras__chr6	1.78427	4.41131	0.374149	11.7903	4.38235e-32	3.80257e-31
Mrpl13__chr15	1.94974	4.41084	0.411095	10.7295	7.40022e-27	5.06545e-26
Ntpcr__chr8	1.06038	4.41036	0.521004	8.4651	2.55925e-17	1.11033e-16
0610010K14Rik__chr11	1.26468	4.41023	0.393917	11.1958	4.27329e-29	3.23902e-28
Tspan4__chr7	1.0662	4.40896	0.501682	8.78837	1.51748e-18	7.01906e-18
Tpp2__chr1	1.40755	4.40871	0.38151	11.5559	6.88833e-31	5.67661e-30
Trim25__chr11	1.54621	4.40836	0.390612	11.2858	1.54265e-29	1.19338e-28
Mrp63__chr14	1.55966	4.4083	0.459595	9.5917	8.66444e-22	4.65355e-21
Vma21__chrX	1.72136	4.40797	0.340552	12.9436	2.55399e-38	2.89838e-37
Celf1__chr2	2.43621	4.40765	0.327062	13.4765	2.15147e-41	2.80536e-40
Efemp2__chr19	0.92499	4.40693	0.586542	7.51341	5.76055e-14	2.06572e-13
Scamp2__chr9	1.57654	4.40678	0.353916	12.4515	1.37232e-35	1.3757e-34
Wapal__chr14	1.14735	4.40677	0.458405	9.61326	7.02867e-22	3.795e-21
Bod1l__chr5	1.82751	4.40584	0.386293	11.4054	3.9282e-30	3.13575e-29
Rgl2__chr17	1.76434	4.40557	0.425622	10.3509	4.14533e-25	2.62464e-24
Mien1__chr11	1.66832	4.40556	0.387524	11.3685	6.00111e-30	4.74797e-29
Wwp1__chr4	1.73146	4.40538	0.380774	11.5695	5.88001e-31	4.85126e-30
Hax1__chr3	1.49094	4.40531	0.430656	10.2293	1.46577e-24	9.0477e-24
Nme2__chr11	17.1691	4.40387	0.216777	20.3152	9.44071e-92	7.73975e-90
Nktr__chr9	1.39476	4.40295	0.428641	10.2719	9.43443e-25	5.88724e-24
Hist1h1c__chr13	2.43062	4.40276	0.414819	10.6137	2.57394e-26	1.72059e-25
Pip4k2a__chr2	1.20909	4.40254	0.472848	9.3107	1.26998e-20	6.47008e-20
Lcp2__chr11	1.14899	4.40204	0.548427	8.02667	1.00157e-15	3.9654e-15
Rbbp6__chr7	1.99422	4.40192	0.352983	12.4706	1.07984e-35	1.08784e-34
Col14a1__chr15	0.971602	4.40188	0.651464	6.7569	1.40977e-11	4.37371e-11
Ahnak__chr19	13.1222	4.40161	0.297318	14.8044	1.37238e-49	2.48125e-48
Baz1b__chr5	2.12151	4.40113	0.368185	11.9536	6.2192e-33	5.58671e-32
Arglu1__chr8	2.31769	4.40099	0.339166	12.9759	1.67523e-38	1.91946e-37
Pdcd10__chr3	1.24851	4.40094	0.416153	10.5753	3.87962e-26	2.5693e-25
B230219D22Rik__chr13	2.04389	4.40052	0.354855	12.4009	2.58436e-35	2.56726e-34
Psme1__chr14	2.45006	4.4004	0.318677	13.8083	2.26972e-43	3.23129e-42
Dda1__chr8	1.92325	4.40021	0.383976	11.4596	2.10462e-30	1.69618e-29
Tmem126a__chr7	2.09217	4.40017	0.387757	11.3478	7.60753e-30	5.99235e-29
Chtop__chr3	1.62602	4.39971	0.363631	12.0994	1.0643e-33	9.86497e-33
Pygl__chr12	1.09438	4.39895	0.591249	7.4401	1.00612e-13	3.55697e-13
Arpc1a__chr5	1.73135	4.3976	0.382264	11.5041	1.2577e-30	1.02462e-29
Aes__chr10	17.6606	4.39743	0.257588	17.0716	2.41502e-65	8.10594e-64
Eps15__chr4	1.27418	4.39739	0.450534	9.76041	1.6648e-22	9.24418e-22
Cuta__chr17	1.57775	4.39727	0.326622	13.4629	2.58611e-41	3.35067e-40
Hectd1__chr12	1.90257	4.39659	0.357784	12.2884	1.04551e-34	1.01319e-33
Gpx4__chr10	13.2888	4.39596	0.240885	18.2492	2.10084e-74	9.63618e-73
Rbms2__chr10	1.96018	4.39546	0.383679	11.4561	2.19221e-30	1.76577e-29
Ndrg1__chr15	2.0745	4.39539	0.467496	9.40199	5.35415e-21	2.77331e-20
Dbn1__chr13	0.920588	4.3951	0.53405	8.22975	1.87606e-16	7.73691e-16
Rhoq__chr17	2.26351	4.39358	0.361768	12.1447	6.11776e-34	5.76038e-33
Smap2__chr4	1.8316	4.39316	0.399967	10.9838	4.57197e-28	3.30726e-27
Spen__chr4	1.7797	4.39214	0.392474	11.1909	4.51806e-29	3.41729e-28
Brd3__chr2	1.48779	4.39203	0.390772	11.2394	2.61188e-29	1.99885e-28
Snhg8__chr3	1.40977	4.39036	0.460221	9.53967	1.43286e-21	7.63246e-21
H1f0__chr15	2.42841	4.38985	0.345952	12.6892	6.79057e-37	7.22353e-36
Meg3__chr12	0.921764	4.38978	0.733357	5.98587	2.15237e-09	5.81286e-09
Anapc2__chr2	1.47689	4.38964	0.355026	12.3643	4.0792e-35	4.01586e-34
Mff__chr1	3.28027	4.38908	0.343198	12.7888	1.89449e-37	2.0614e-36
0610012G03Rik__chr16	2.64801	4.38903	0.344517	12.7397	3.55895e-37	3.83738e-36
Slk__chr19	3.01966	4.38876	0.330386	13.2837	2.87676e-40	3.52854e-39
Birc6__chr17	1.64803	4.38809	0.378171	11.6034	3.95843e-31	3.28487e-30
Gnl3__chr14	1.20645	4.38789	0.446892	9.81867	9.35692e-23	5.26327e-22
Bhlhe40__chr6	1.20402	4.38752	0.490579	8.94355	3.76854e-19	1.79793e-18
Slc2a1__chr4	1.12283	4.3853	0.509102	8.61379	7.06836e-18	3.16578e-17
Bscl2__chr19	1.14476	4.38492	0.434033	10.1027	5.37163e-24	3.21015e-23
Cic__chr7	1.34569	4.38476	0.407486	10.7605	5.28711e-27	3.64527e-26
Rdx__chr9	3.40856	4.38403	0.32034	13.6855	1.23871e-42	1.71223e-41
Cep170__chr1	1.05363	4.38336	0.440089	9.96015	2.27711e-23	1.3167e-22
Spcs1__chr14	2.74406	4.38331	0.271341	16.1542	1.06039e-58	2.79601e-57
Taf1d__chr9	1.10569	4.38303	0.475874	9.21047	3.24704e-20	1.62809e-19
Idh1__chr1	1.31656	4.38237	0.432719	10.1275	4.17103e-24	2.50631e-23
Chsy1__chr7	1.029	4.38208	0.535214	8.18752	2.66663e-16	1.09466e-15
Egln3__chr12	2.20839	4.38165	0.399928	10.9561	6.21141e-28	4.46377e-27
Mtch2__chr2	2.47711	4.38101	0.328913	13.3197	1.77924e-40	2.20895e-39
Pak1ip1__chr13	2.039	4.38032	0.36084	12.1392	6.54275e-34	6.14028e-33
Atp6v0b__chr4	2.86376	4.37992	0.280597	15.6093	6.29187e-55	1.42692e-53
Smad4__chr18	1.66383	4.3793	0.411393	10.645	1.839e-26	1.24093e-25
G3bp2__chr5	2.0697	4.3787	0.371351	11.7913	4.32925e-32	3.75878e-31
D10Wsu52e__chr10	1.1908	4.37747	0.392258	11.1597	6.42351e-29	4.82524e-28
Ppm1g__chr5	1.25867	4.37702	0.396024	11.0524	2.1346e-28	1.56556e-27
Snf8__chr11	1.49033	4.37513	0.397124	11.017	3.16305e-28	2.30444e-27
Cops4__chr5	2.02259	4.37344	0.394677	11.0811	1.55033e-28	1.14766e-27
Tmem14c__chr13	2.49491	4.37274	0.271352	16.1146	2.01405e-58	5.22371e-57
Mycbp2__chr14	2.50212	4.37227	0.358362	12.2007	3.08146e-34	2.93634e-33
Armc1__chr3	1.79038	4.37203	0.388893	11.2422	2.5287e-29	1.93623e-28
Ncor1__chr11	3.81275	4.37161	0.306559	14.2603	3.87031e-46	6.14811e-45
Aida__chr1	1.9393	4.37097	0.416861	10.4854	1.00789e-25	6.57708e-25
Limd2__chr11	0.999187	4.37055	0.522038	8.3721	5.66011e-17	2.40804e-16
Ppp2cb__chr8	1.9235	4.37039	0.441341	9.90252	4.05911e-23	2.32917e-22
Ppp2r2a__chr14	2.38692	4.37018	0.367781	11.8826	1.45843e-32	1.2906e-31
Ezr__chr17	1.48297	4.36995	0.409679	10.6667	1.45634e-26	9.8645e-26
Nabp2__chr10	1.79024	4.36955	0.387079	11.2885	1.49516e-29	1.15853e-28
Sod1__chr16	8.70373	4.36918	0.266334	16.4049	1.76405e-60	4.99289e-59
Oaf__chr9	0.889478	4.36911	0.610747	7.15371	8.44641e-13	2.81711e-12
Ctbp2__chr7	1.37069	4.36883	0.419094	10.4245	1.91755e-25	1.23327e-24
Stk4__chr2	1.40414	4.36827	0.439768	9.93312	2.98769e-23	1.72199e-22
Bcap31__chrX	2.01495	4.36827	0.339629	12.8619	7.37634e-38	8.16318e-37
Prkx__chrX	1.52846	4.36803	0.460997	9.47518	2.66298e-21	1.40123e-20
Atf1__chr15	1.55403	4.36797	0.387261	11.2791	1.66383e-29	1.28503e-28
Trappc6b__chr12	2.40351	4.3678	0.370747	11.7811	4.88635e-32	4.22447e-31
Rhob__chr12	2.26019	4.36771	0.373762	11.6858	1.50685e-31	1.28176e-30
Sbno1__chr5	2.07926	4.3633	0.374008	11.6663	1.89441e-31	1.60283e-30
Rbm42__chr7	1.61824	4.36262	0.359844	12.1236	7.91749e-34	7.3964e-33
Lox__chr18	0.890405	4.36143	0.866058	5.03596	4.75468e-07	1.09946e-06
Ddx3y__chrY	3.09445	4.36091	0.316504	13.7784	3.43934e-43	4.86245e-42
Plod1__chr4	2.23042	4.36052	0.33905	12.861	7.46018e-38	8.24957e-37
Mcm5__chr8	0.905384	4.36004	0.650026	6.70748	1.98012e-11	6.10073e-11
Grk6__chr13	1.39264	4.35974	0.459855	9.48069	2.52603e-21	1.32966e-20
Mcts1__chrX	1.59552	4.35946	0.387055	11.2632	1.99471e-29	1.53394e-28
Efr3a__chr15	1.71834	4.35901	0.36066	12.0862	1.24926e-33	1.15644e-32
Plk1__chr7	0.819075	4.35858	0.749906	5.81217	6.16694e-09	1.61772e-08
Ing1__chr8	1.28632	4.35821	0.421481	10.3402	4.63348e-25	2.92463e-24
Hcfc1r1__chr17	3.30417	4.35765	0.323363	13.476	2.16458e-41	2.81988e-40
Pmp22__chr11	1.28453	4.35667	0.444291	9.8059	1.06199e-22	5.95962e-22
Pofut2__chr10	1.65682	4.35539	0.327525	13.2979	2.38069e-40	2.93776e-39
Pgs1__chr11	1.57531	4.35496	0.450141	9.67465	3.86424e-22	2.10716e-21
Ube2f__chr1	1.34684	4.35471	0.417647	10.4268	1.87111e-25	1.20394e-24
Ctdsp1__chr1	2.26719	4.35449	0.354321	12.2897	1.0289e-34	9.97778e-34
Cebpg__chr7	1.70223	4.354	0.404004	10.7771	4.4143e-27	3.05235e-26
P2ry6__chr7	0.894266	4.3529	0.716039	6.07914	1.20831e-09	3.3256e-09
Slc35b1__chr11	1.53863	4.35259	0.34288	12.6942	6.36826e-37	6.77935e-36
Smek2__chr11	1.44347	4.35249	0.430511	10.11	4.98611e-24	2.98226e-23
Slc20a1__chr2	1.17206	4.35205	0.456696	9.52943	1.58152e-21	8.4118e-21
Gba__chr3	1.08018	4.3514	0.460797	9.4432	3.61558e-21	1.88993e-20
Rsl1d1__chr16	1.76624	4.35116	0.338157	12.8673	6.8774e-38	7.62878e-37
Eif1b__chr9	1.75334	4.35075	0.396643	10.9689	5.38952e-28	3.88095e-27
Myadm__chr7	5.99926	4.35041	0.328364	13.2487	4.58902e-40	5.56653e-39
Id3__chr4	4.29246	4.34989	0.486429	8.9425	3.80468e-19	1.81396e-18
Ppa1__chr10	1.42468	4.34856	0.433264	10.0368	1.05072e-23	6.20127e-23
Psat1__chr19	1.05317	4.34841	0.524787	8.28605	1.17074e-16	4.88323e-16
Ncf4__chr15	1.009	4.34806	0.730427	5.95277	2.6364e-09	7.08121e-09
Mrpl12__chr11	4.13894	4.34752	0.326432	13.3183	1.81141e-40	2.24694e-39
Srpr__chr9	1.74246	4.34748	0.35249	12.3336	5.97056e-35	5.84157e-34
Larp4__chr15	1.60472	4.34566	0.361669	12.0156	2.94362e-33	2.67798e-32
Pmf1__chr3	1.20193	4.34562	0.438993	9.89906	4.20191e-23	2.40627e-22
Ufc1__chr1	1.61838	4.34551	0.363198	11.9646	5.44775e-33	4.90298e-32
Cbx5__chr15	2.27283	4.34492	0.365867	11.8757	1.58352e-32	1.39956e-31
Il1r2__chr1	1.3821	4.34429	0.872929	4.97669	6.46818e-07	1.4808e-06
Mettl9__chr7	2.1539	4.34291	0.398366	10.9018	1.12991e-27	8.01103e-27
BC005537__chr13	1.32828	4.34064	0.423278	10.2548	1.12587e-24	7.00109e-24
Btaf1__chr19	1.16711	4.34057	0.424799	10.2179	1.64825e-24	1.01565e-23
Derl1__chr15	1.96288	4.33981	0.316266	13.722	7.49231e-43	1.03967e-41
Dctn3__chr4	1.36168	4.33958	0.395136	10.9825	4.63836e-28	3.35188e-27
Ets2__chr16	2.53955	4.33953	0.425035	10.2098	1.79196e-24	1.10182e-23
Ubl4__chrX	2.30076	4.33946	0.364669	11.8997	1.18741e-32	1.05601e-31
Zfp710__chr7	1.27682	4.33893	0.423205	10.2526	1.15262e-24	7.16119e-24
N4bp1__chr8	1.21432	4.33889	0.423233	10.2518	1.16178e-24	7.21185e-24
Srxn1__chr2	1.3748	4.33851	0.469856	9.2337	2.61435e-20	1.31501e-19
Chd8__chr14	1.5165	4.33827	0.407493	10.6462	1.8154e-26	1.22559e-25
Trove2__chr1	1.78326	4.33764	0.449214	9.65607	4.63301e-22	2.51675e-21
Grina__chr15	1.77691	4.33741	0.347459	12.4832	9.21788e-36	9.31254e-35
Fli1__chr9	1.33719	4.33606	0.509714	8.50686	1.78711e-17	7.83441e-17
Smg1__chr7	1.71234	4.33558	0.389313	11.1365	8.33341e-29	6.23694e-28
Adcy7__chr8	1.00094	4.33535	0.551782	7.857	3.93458e-15	1.50232e-14
Taok1__chr11	2.59188	4.3349	0.334065	12.9762	1.66941e-38	1.91432e-37
Fam198b__chr3	1.76638	4.33485	0.51171	8.4713	2.42666e-17	1.05441e-16
Iscu__chr5	2.80922	4.3347	0.341613	12.6889	6.81225e-37	7.24118e-36
Ddx1__chr12	2.66784	4.33456	0.334793	12.947	2.44393e-38	2.77791e-37
Pik3cd__chr4	1.18179	4.33423	0.562438	7.70616	1.2966e-14	4.81541e-14
Atg3__chr16	1.41664	4.33421	0.45239	9.58068	9.64067e-22	5.17203e-21
Cacul1__chr19	1.53662	4.33416	0.417617	10.3783	3.11275e-25	1.97964e-24
Pfkl__chr10	1.3859	4.33343	0.37118	11.6747	1.71592e-31	1.4544e-30
Prrx1__chr1	1.46165	4.33311	0.459219	9.43582	3.8795e-21	2.02492e-20
Arih1__chr9	1.71231	4.33273	0.375579	11.5362	8.67191e-31	7.11356e-30
Sf3a2__chr10	1.17302	4.33227	0.377435	11.4782	1.69789e-30	1.37538e-29
Sel1l__chr12	2.00129	4.33181	0.327012	13.2466	4.71832e-40	5.71851e-39
Mrpl40__chr16	1.2897	4.33144	0.417162	10.3831	2.95965e-25	1.88648e-24
Abhd4__chr14	1.59193	4.33029	0.386799	11.1952	4.30519e-29	3.26147e-28
[truncated: 14,483 more rows]
