# Supplementary material for: Cardiomyocytes stimulate angiogenesis after ischemic injury in a ZEB2-dependent manner
Source: Nat Commun. 2021 Jan 4;12:84. doi: 10.1038/s41467-020-20361-3 (PMC7782784; doi:10.1038/s41467-020-20361-3)
Supplement: Supplementary file 6 — Supplementary Data 3 [file 41467_2020_20361_MOESM6_ESM.xlsx]

## Sheet: Supplementary Data 3
id	baseMean	baseMean WT	baseMean KO	foldChange	log2FoldChange	pval	padj multiple testing	genesymbol
ENSMUSG00000069117	76.6066	1.05707	152.156	143.941	7.16934	0.121028	1
ENSMUSG00000068303	8.10294	0.333804	15.8721	47.5491	5.57134	0.2369	1
ENSMUSG00000090671	6.16867	0.381968	11.9554	31.2994	4.96806	0.00984623	1	Gm5067
ENSMUSG00000091705	4.07563	0.381968	7.76929	20.3402	4.34626	0.338349	1	H2-Q2
ENSMUSG00000028386	43.4262	4.52475	82.3277	18.195	4.18547	0.0155009	1	Slc46a2
ENSMUSG00000053388	7.98059	1.1534	14.8078	12.8384	3.6824	0.0591231	1	Trim50
ENSMUSG00000081460	2.62575	0.381968	4.86953	12.7485	3.67226	0.034807	1
ENSMUSG00000034427	2.15815	0.333804	3.98249	11.9306	3.57659	0.0762893	1
ENSMUSG00000056306	2.23247	0.389461	4.07548	10.4644	3.38742	0.138248	1	Sertm1
ENSMUSG00000036834	1.86159	0.333804	3.38937	10.1538	3.34394	0.126704	1	Plch1
ENSMUSG00000085987	2.16404	0.389461	3.93862	10.113	3.33814	0.0760142	1
ENSMUSG00000039238	3.95252	0.763936	7.14111	9.34779	3.22463	0.030843	1	Zfp750
ENSMUSG00000093793	1.71725	0.333804	3.1007	9.28898	3.21552	0.162508	1
ENSMUSG00000073402	3.37396	0.667609	6.08032	9.1076	3.18707	0.452017	1	Gm8909
ENSMUSG00000095068	1.6225	0.333804	2.91119	8.72124	3.12453	0.171557	1
ENSMUSG00000094345	1.88371	0.389461	3.37795	8.67341	3.1166	0.477679	1
ENSMUSG00000051209	3.20815	0.667609	5.74869	8.61086	3.10616	0.0427672	1	Gpr119
ENSMUSG00000085560	1.53607	0.333804	2.73834	8.20344	3.03623	0.21216	1
ENSMUSG00000049336	3.55334	0.778922	6.32775	8.12373	3.02214	0.0652864	1	Tenm2
ENSMUSG00000087200	3.47414	0.771429	6.17685	8.00703	3.00127	0.113294	1
ENSMUSG00000083176	1.49484	0.333804	2.65587	7.95636	2.99211	0.217016	1
ENSMUSG00000025787	1.7135	0.389461	3.03753	7.79932	2.96335	0.162848	1	Tgm4
ENSMUSG00000065110	1.70385	0.389461	3.01823	7.74976	2.95415	0.163729	1
ENSMUSG00000055540	1.45491	0.333804	2.57602	7.71715	2.94807	0.347652	1	Epha6
ENSMUSG00000066537	1.43035	0.333804	2.52689	7.56998	2.92029	0.265423	1	Vmn2r57
ENSMUSG00000001417	1.4207	0.333804	2.50759	7.51215	2.90923	0.2667	1	Rhbg
ENSMUSG00000078183	9.13188	2.15481	16.1089	7.47581	2.90223	0.000442975	1
ENSMUSG00000092278	1.40139	0.333804	2.46898	7.39649	2.88684	0.2693	1
ENSMUSG00000086266	3.24844	0.778922	5.71797	7.34087	2.87595	0.0377159	1	Igf2os
ENSMUSG00000089947	1.32594	0.333804	2.31807	6.94441	2.79585	0.280075	1
ENSMUSG00000080676	1.5446	0.389461	2.69974	6.93198	2.79327	0.211186	1
ENSMUSG00000093175	1.53232	0.389461	2.67517	6.86891	2.78008	0.212593	1
ENSMUSG00000070332	1.49435	0.381968	2.60674	6.8245	2.77072	0.306181	1	4933422H20Rik
ENSMUSG00000088007	1.29567	0.333804	2.25753	6.76303	2.75767	0.336585	1
ENSMUSG00000073403	2.77203	0.715772	4.82829	6.74556	2.75394	0.18118	1
ENSMUSG00000087707	1.44478	0.381968	2.50759	6.56492	2.71478	0.26354	1
ENSMUSG00000064984	1.23952	0.333804	2.14523	6.4266	2.68406	0.345454	1
ENSMUSG00000046637	1.2325	0.333804	2.13119	6.38453	2.67458	0.346608	1	Ttc34
ENSMUSG00000051606	2.86809	0.778922	4.95727	6.36426	2.66999	0.0726447	1
ENSMUSG00000069136	1.20091	0.333804	2.06801	6.19529	2.63117	0.351931	1
ENSMUSG00000009487	1.36932	0.381968	2.35668	6.16984	2.62523	0.273756	1	Otog
ENSMUSG00000041138	1.36932	0.381968	2.35668	6.16984	2.62523	0.273756	1	Nme8
ENSMUSG00000069588	1.18863	0.333804	2.04345	6.1217	2.61393	0.354062	1
ENSMUSG00000092990	1.35967	0.381968	2.33738	6.1193	2.61337	0.275132	1
ENSMUSG00000078498	1.38272	0.389461	2.37598	6.1007	2.60897	0.271873	1
ENSMUSG00000072618	1.17898	0.333804	2.02415	6.06387	2.60024	0.35576	1
ENSMUSG00000085160	1.35377	0.389461	2.31807	5.95201	2.57338	0.275983	1
ENSMUSG00000097160	2.66123	0.771429	4.55104	5.89949	2.56059	0.0936622	1
ENSMUSG00000067642	4.9602	1.44653	8.47387	5.85807	2.55042	0.190213	1	Gpr113
ENSMUSG00000030495	1.13642	0.333804	1.93904	5.8089	2.53826	0.430161	1	Slc7a10
ENSMUSG00000064792	2.4586	0.723265	4.19394	5.79862	2.53571	0.120138	1
ENSMUSG00000041789	1.29781	0.381968	2.21366	5.79541	2.53491	0.336257	1	2700046A07Rik
ENSMUSG00000025955	1.11712	0.333804	1.90043	5.69324	2.50925	0.433611	1	Akr1cl
ENSMUSG00000051805	1.27588	0.381968	2.16979	5.68056	2.50603	0.339639	1
ENSMUSG00000074252	2.37501	0.715772	4.03425	5.63622	2.49473	0.257214	1	Gm10654
ENSMUSG00000028351	10.5823	3.26754	17.8971	5.47724	2.45345	0.0012214	1	Brinp1
ENSMUSG00000084601	1.07325	0.333804	1.81269	5.43041	2.44106	0.441791	1
ENSMUSG00000097260	2.1465	0.667609	3.62539	5.43041	2.44106	0.187579	1
ENSMUSG00000089286	1.24804	0.389461	2.10662	5.40907	2.43538	0.344066	1
ENSMUSG00000092522	1.22236	0.381968	2.06275	5.40033	2.43305	0.348292	1
ENSMUSG00000012042	1.0636	0.333804	1.79339	5.37258	2.42561	0.443657	1	4930579F01Rik
ENSMUSG00000093604	1.23839	0.389461	2.08732	5.3595	2.4221	0.345638	1
ENSMUSG00000095803	2.11491	0.667609	3.56222	5.33578	2.4157	0.190157	1
ENSMUSG00000042045	18.038	5.69634	30.3797	5.33319	2.415	0.30287	1	Sln
ENSMUSG00000097884	1.22874	0.389461	2.06801	5.30994	2.4087	0.34723	1
ENSMUSG00000065436	1.05132	0.333804	1.76883	5.29899	2.40572	0.446068	1
ENSMUSG00000090840	1.22611	0.389461	2.06275	5.29643	2.40502	0.347667	1	1700092M07Rik
ENSMUSG00000085452	1.20043	0.381968	2.01889	5.28549	2.40204	0.352014	1
ENSMUSG00000033579	1.21646	0.389461	2.04345	5.24687	2.39146	0.349284	1	Fa2h
ENSMUSG00000020469	79.0101	25.5533	132.467	5.18393	2.37405	0.241088	1	Myl7
ENSMUSG00000069862	1.03201	0.333804	1.73022	5.18333	2.37388	0.449941	1
ENSMUSG00000081394	1.02938	0.333804	1.72496	5.16757	2.36949	0.450477	1	Gm13215
ENSMUSG00000089744	1.19452	0.389461	1.99958	5.13423	2.36015	0.353035	1
ENSMUSG00000093624	3.15038	1.04958	5.25119	5.00315	2.32284	0.105486	1
ENSMUSG00000039661	23.1028	7.71858	38.4869	4.98627	2.31796	0.332256	1	Dusp26
ENSMUSG00000020799	2.15502	0.723265	3.58678	4.95915	2.31009	0.186895	1	Tekt1
ENSMUSG00000085748	2.15239	0.723265	3.58152	4.95187	2.30797	0.187106	1	LOC102639957
ENSMUSG00000081329	7.71436	2.59243	12.8363	4.95144	2.30785	0.352399	1
ENSMUSG00000034783	2.25783	0.763936	3.75173	4.91106	2.29603	0.17904	1	Cd207
ENSMUSG00000046782	1.12892	0.381968	1.87587	4.91106	2.29603	0.431492	1	4921506M07Rik
ENSMUSG00000036123	35.6446	12.0678	59.2214	4.9074	2.29496	5.27154e-07	0.0127123	Slc9a3
ENSMUSG00000046844	4.07273	1.38338	6.76207	4.88808	2.28927	0.0559623	1	Vat1l
ENSMUSG00000008153	1.14231	0.389461	1.89517	4.86613	2.28278	0.429125	1	Clstn3
ENSMUSG00000040938	1.11926	0.381968	1.85656	4.86052	2.28111	0.433223	1	Slc16a11
ENSMUSG00000034755	21.9745	7.50651	36.4425	4.85479	2.27941	0.123301	1	Pcdh11x
ENSMUSG00000086762	1.13266	0.389461	1.87587	4.81657	2.26801	0.430826	1
ENSMUSG00000087346	1.13266	0.389461	1.87587	4.81657	2.26801	0.430826	1
ENSMUSG00000082480	0.967523	0.333804	1.60124	4.79694	2.26212	0.548811	1
ENSMUSG00000097058	1.12301	0.389461	1.85656	4.767	2.25308	0.432548	1	4930556M19Rik
ENSMUSG00000053719	5.27051	1.8285	8.71253	4.76485	2.25243	0.0826197	1	Klk1b26
ENSMUSG00000082148	4.29991	1.49469	7.10513	4.75357	2.24901	0.0446467	1
ENSMUSG00000081683	1.12038	0.389461	1.8513	4.75349	2.24899	0.433022	1	Fzd10
ENSMUSG00000093874	1.12038	0.389461	1.8513	4.75349	2.24899	0.433022	1
ENSMUSG00000082143	1.11336	0.389461	1.83726	4.71744	2.238	0.434293	1
ENSMUSG00000027107	4.42821	1.55035	7.30606	4.71252	2.2365	0.0369758	1	Chr1
ENSMUSG00000084997	0.948219	0.333804	1.56263	4.68129	2.2269	0.552669	1	Gm15471
ENSMUSG00000030523	1.0754	0.381968	1.76883	4.63082	2.21127	0.441379	1	Trpm1
ENSMUSG00000042306	0.935937	0.333804	1.53807	4.6077	2.20405	0.55518	1	S100a14
ENSMUSG00000096882	0.935937	0.333804	1.53807	4.6077	2.20405	0.55518	1
ENSMUSG00000092954	1.06575	0.381968	1.74952	4.58029	2.19544	0.443239	1
ENSMUSG00000078599	1.06311	0.381968	1.74426	4.56651	2.19109	0.471759	1	Skint8
ENSMUSG00000087190	0.926285	0.333804	1.51877	4.54987	2.18582	0.557186	1
ENSMUSG00000096140	0.926285	0.333804	1.51877	4.54987	2.18582	0.557186	1	Ankrd66
ENSMUSG00000032446	1.07914	0.389461	1.76883	4.54173	2.18324	0.440663	1	Eomes
ENSMUSG00000085816	1.07914	0.389461	1.76883	4.54173	2.18324	0.440663	1
ENSMUSG00000035262	2.13524	0.771429	3.49904	4.5358	2.18136	0.18849	1	Amh
ENSMUSG00000031725	0.923655	0.333804	1.51351	4.53411	2.18082	0.557738	1	Ces1f
ENSMUSG00000068122	0.923655	0.333804	1.51351	4.53411	2.18082	0.557738	1	Agtr2
ENSMUSG00000091402	1.07651	0.389461	1.76356	4.52822	2.17894	0.590822	1	Rd3l
ENSMUSG00000031966	2.07928	0.763936	3.39463	4.44361	2.15173	0.225176	1	Glb1l3
ENSMUSG00000024485	1.05721	0.389461	1.72496	4.42909	2.14701	0.444906	1	Slc4a9
ENSMUSG00000064310	0.904351	0.333804	1.4749	4.41845	2.14354	0.561851	1	Zpld1
ENSMUSG00000086470	0.904351	0.333804	1.4749	4.41845	2.14354	0.561851	1
ENSMUSG00000030278	7.90538	2.92624	12.8845	4.4031	2.13852	0.00975231	1	Cidec
ENSMUSG00000030730	7.87839	2.91875	12.838	4.39848	2.137	0.0666439	1	Atp2a1
ENSMUSG00000082023	0.8947	0.333804	1.45559	4.36062	2.12453	0.563953	1
ENSMUSG00000081675	0.892069	0.333804	1.45033	4.34486	2.11931	0.564532	1
ENSMUSG00000062151	46.2167	17.3093	75.1242	4.34012	2.11773	0.0103263	1	Unc13c
ENSMUSG00000087828	1.01354	0.381968	1.64511	4.30693	2.10666	0.540029	1
ENSMUSG00000081793	0.885048	0.333804	1.43629	4.30279	2.10527	0.566086	1	5730416F02Rik
ENSMUSG00000085876	12.8189	4.84357	20.7942	4.29316	2.10204	0.00126707	1	Gm12409
ENSMUSG00000085262	0.882418	0.333804	1.43103	4.28703	2.09998	0.566673	1
ENSMUSG00000089447	2.91456	1.10523	4.72388	4.27411	2.09562	0.133543	1
ENSMUSG00000015484	0.872766	0.333804	1.41173	4.2292	2.08039	0.568846	1	Fam163a
ENSMUSG00000069814	4.85849	1.86168	7.85531	4.21948	2.07707	0.0423565	1	E130309D14Rik
ENSMUSG00000039691	1.88742	0.723265	3.05158	4.21916	2.07696	0.283347	1	Tspan10
ENSMUSG00000097591	1.87777	0.723265	3.03227	4.19247	2.0678	0.284368	1	A330032B11Rik
ENSMUSG00000022763	0.991604	0.381968	1.60124	4.19208	2.06767	0.544144	1	Aifm3
ENSMUSG00000072625	1.72754	0.667609	2.78747	4.17531	2.06188	0.350607	1	Gdf2
ENSMUSG00000026018	1.00763	0.389461	1.62581	4.1745	2.0616	0.541124	1	Ica1l
ENSMUSG00000082917	2.7152	1.04958	4.38083	4.1739	2.0614	0.166048	1
ENSMUSG00000026841	0.863114	0.333804	1.39242	4.17138	2.06052	0.571052	1	Fibcd1
ENSMUSG00000008489	15.2911	5.92312	24.6592	4.1632	2.05769	0.0205366	1	Elavl2
ENSMUSG00000014542	1.85847	0.723265	2.99366	4.1391	2.04932	0.286436	1	Clec4f
ENSMUSG00000041453	99.7015	38.9912	160.412	4.11406	2.04056	0.0718029	1	Rpl21
ENSMUSG00000002791	0.995351	0.389461	1.60124	4.11143	2.03964	0.543432	1	Pdxk-ps
ENSMUSG00000022832	1.96765	0.771429	3.16388	4.10132	2.03609	0.275194	1	Ropn1
ENSMUSG00000085110	1.8205	0.715772	2.92523	4.08682	2.03098	0.290612	1
ENSMUSG00000033036	1.81787	0.715772	2.91997	4.07947	2.02838	0.487756	1
ENSMUSG00000005251	10.1479	3.9983	16.2976	4.07613	2.0272	0.00534815	1	Ripk4
ENSMUSG00000092851	1.8339	0.723265	2.94454	4.07117	2.02544	0.289121	1
ENSMUSG00000080370	1.93232	0.763936	3.1007	4.05885	2.02107	0.278713	1
ENSMUSG00000081005	0.960019	0.381968	1.53807	4.0267	2.0096	0.550298	1
ENSMUSG00000050505	17.9757	7.15452	28.7969	4.025	2.00899	0.153899	1	Pcdh20
ENSMUSG00000045912	0.950367	0.381968	1.51877	3.97616	1.99138	0.552234	1	C2cd4c
ENSMUSG00000072591	0.950367	0.381968	1.51877	3.97616	1.99138	0.552234	1	5930412G12Rik
ENSMUSG00000027559	57.5577	23.2506	91.8649	3.95108	1.98225	0.112755	1	Car3
ENSMUSG00000090843	0.940715	0.381968	1.49946	3.92563	1.97292	0.554198	1	LOC101055670
ENSMUSG00000035085	0.820559	0.333804	1.30731	3.91641	1.96953	0.690579	1	1700020L24Rik
ENSMUSG00000052276	0.820559	0.333804	1.30731	3.91641	1.96953	0.690579	1	Ostn
ENSMUSG00000088768	0.938085	0.381968	1.4942	3.91185	1.96785	0.554738	1
ENSMUSG00000050440	0.954114	0.389461	1.51877	3.89966	1.96335	0.551479	1	Hamp
ENSMUSG00000074179	0.954114	0.389461	1.51877	3.89966	1.96335	0.551479	1	Gm10639
ENSMUSG00000082852	0.954114	0.389461	1.51877	3.89966	1.96335	0.551479	1
ENSMUSG00000083893	0.954114	0.389461	1.51877	3.89966	1.96335	0.551479	1
ENSMUSG00000087692	3.3888	1.38338	5.39421	3.8993	1.96321	0.141214	1
ENSMUSG00000000942	2.70948	1.11273	4.30624	3.86999	1.95233	0.192141	1	Hoxa4
ENSMUSG00000097255	0.928433	0.381968	1.4749	3.86132	1.94909	0.556737	1
ENSMUSG00000000690	0.810907	0.333804	1.28801	3.85858	1.94807	0.692472	1	Hoxb6
ENSMUSG00000065627	0.810907	0.333804	1.28801	3.85858	1.94807	0.692472	1
ENSMUSG00000080972	0.810907	0.333804	1.28801	3.85858	1.94807	0.692472	1
ENSMUSG00000061100	38.1384	15.7182	60.5586	3.85276	1.94589	0.0200506	1	Retnla
ENSMUSG00000058186	0.925803	0.381968	1.46964	3.84754	1.94394	0.646971	1	Gm13242
ENSMUSG00000047230	0.941831	0.389461	1.4942	3.83659	1.93982	0.55397	1	Cldn2
ENSMUSG00000052133	11.2111	4.64356	17.7786	3.82866	1.93684	0.00405949	1	Sema5b
ENSMUSG00000063239	1.74309	0.723265	2.76291	3.82005	1.93359	0.348747	1	Grm4
ENSMUSG00000004872	0.918781	0.381968	1.45559	3.81078	1.93009	0.558765	1	Pax3
ENSMUSG00000087652	0.918781	0.381968	1.45559	3.81078	1.93009	0.558765	1
ENSMUSG00000078291	0.916151	0.381968	1.45033	3.79701	1.92486	0.559323	1
ENSMUSG00000065647	0.93218	0.389461	1.4749	3.78702	1.92106	0.555958	1
ENSMUSG00000084828	0.93218	0.389461	1.4749	3.78702	1.92106	0.555958	1
ENSMUSG00000037716	0.798625	0.333804	1.26345	3.78499	1.92029	0.694924	1	Ccdc33
ENSMUSG00000068745	13.6951	5.752	21.6382	3.76186	1.91145	0.3959	1	Mybphl
ENSMUSG00000032900	0.922528	0.389461	1.45559	3.73746	1.90206	0.557974	1	Tex43
ENSMUSG00000039391	0.788973	0.333804	1.24414	3.72716	1.89808	0.696885	1	Ccdc81
ENSMUSG00000064970	0.788973	0.333804	1.24414	3.72716	1.89808	0.696885	1
ENSMUSG00000081703	0.788973	0.333804	1.24414	3.72716	1.89808	0.696885	1
ENSMUSG00000083696	0.788973	0.333804	1.24414	3.72716	1.89808	0.696885	1
ENSMUSG00000089688	0.788973	0.333804	1.24414	3.72716	1.89808	0.696885	1
ENSMUSG00000059776	0.896847	0.381968	1.41173	3.69593	1.88594	0.563483	1
ENSMUSG00000006784	5.73003	2.44045	9.0196	3.69587	1.88592	0.0571261	1	Ttc25
ENSMUSG00000066180	0.912876	0.389461	1.43629	3.6879	1.8828	0.56002	1
ENSMUSG00000023737	1.67617	0.715772	2.63657	3.68353	1.88109	0.356947	1
ENSMUSG00000022805	3.46133	1.4872	5.43546	3.65482	1.8698	0.120407	1	Maats1
ENSMUSG00000033383	0.776691	0.333804	1.21958	3.65357	1.86931	0.699424	1	Rtp1
ENSMUSG00000078850	0.776691	0.333804	1.21958	3.65357	1.86931	0.699424	1
ENSMUSG00000053046	1.54636	0.667609	2.42511	3.63254	1.86098	0.434641	1	Brsk2
ENSMUSG00000089679	4.08516	1.76535	6.40496	3.62816	1.85924	0.273432	1
ENSMUSG00000074771	1.54373	0.667609	2.41985	3.62466	1.85784	0.435003	1	Ankef1
ENSMUSG00000020891	1.66895	0.723265	2.61463	3.61503	1.85401	0.463628	1	Alox8
ENSMUSG00000044405	8.54051	3.70516	13.3759	3.61006	1.85202	0.0164109	1	Adig
ENSMUSG00000096801	0.767039	0.333804	1.20027	3.59574	1.84629	0.701456	1
ENSMUSG00000050423	7.57583	3.30071	11.851	3.59042	1.84415	0.0427792	1	Ppp1r3g
ENSMUSG00000082609	2.42502	1.05707	3.79297	3.58819	1.84326	0.244127	1
ENSMUSG00000096108	1.51609	0.667609	2.36457	3.54185	1.8245	0.691559	1
ENSMUSG00000021590	0.757388	0.333804	1.18097	3.53791	1.8229	0.703521	1	Spata9
ENSMUSG00000027457	0.757388	0.333804	1.18097	3.53791	1.8229	0.703521	1	Snph
ENSMUSG00000056758	0.757388	0.333804	1.18097	3.53791	1.8229	0.703521	1	Hmga2
ENSMUSG00000065047	0.757388	0.333804	1.18097	3.53791	1.8229	0.703521	1
ENSMUSG00000085633	0.757388	0.333804	1.18097	3.53791	1.8229	0.703521	1
ENSMUSG00000088845	0.757388	0.333804	1.18097	3.53791	1.8229	0.703521	1
ENSMUSG00000088949	0.757388	0.333804	1.18097	3.53791	1.8229	0.703521	1
ENSMUSG00000097432	0.757388	0.333804	1.18097	3.53791	1.8229	0.703521	1
ENSMUSG00000040452	0.866575	0.381968	1.35118	3.53742	1.8227	0.733738	1	Cdh12
ENSMUSG00000004668	1.51214	0.667609	2.35668	3.53003	1.81968	0.439416	1	Abca13
ENSMUSG00000044052	0.754757	0.333804	1.17571	3.52215	1.81646	0.734485	1	Ccr10
ENSMUSG00000081849	0.754757	0.333804	1.17571	3.52215	1.81646	0.734485	1
ENSMUSG00000048899	13.3835	5.93061	20.8364	3.51336	1.81285	0.0501195	1	Rimkla
ENSMUSG00000092867	2.50637	1.11273	3.90001	3.50492	1.80938	0.237675	1
ENSMUSG00000012705	1.74898	0.778922	2.71904	3.49077	1.80355	0.348048	1	Retn
ENSMUSG00000019232	1.74898	0.778922	2.71904	3.49077	1.80355	0.348048	1	Etnppl
ENSMUSG00000039198	5.21226	2.32178	8.10273	3.48988	1.80318	0.0846288	1	Ptchd3
ENSMUSG00000065905	0.747736	0.333804	1.16167	3.48008	1.79912	0.705619	1
ENSMUSG00000073079	0.747736	0.333804	1.16167	3.48008	1.79912	0.705619	1	Srp54a
ENSMUSG00000082337	4.16404	1.86168	6.4664	3.47343	1.79636	0.542299	1
ENSMUSG00000035818	1.61543	0.723265	2.50759	3.46704	1.7937	0.425468	1	Plekhs1
ENSMUSG00000067736	0.745105	0.333804	1.15641	3.46432	1.79257	0.706197	1
ENSMUSG00000090077	4.08056	1.83599	6.32512	3.44507	1.78453	0.120173	1	Lime1
ENSMUSG00000020447	1.71365	0.771429	2.65587	3.44279	1.78358	0.352291	1	Npc1l1
ENSMUSG00000000627	2.45173	1.10523	3.79823	3.43659	1.78098	0.241966	1	Sema4f
ENSMUSG00000031022	0.735454	0.333804	1.1371	3.40649	1.76829	0.708338	1	BC051019
ENSMUSG00000033214	0.735454	0.333804	1.1371	3.40649	1.76829	0.708338	1	Slitrk5
ENSMUSG00000065571	0.735454	0.333804	1.1371	3.40649	1.76829	0.708338	1
ENSMUSG00000067215	0.735454	0.333804	1.1371	3.40649	1.76829	0.708338	1	Usp51
ENSMUSG00000079434	0.735454	0.333804	1.1371	3.40649	1.76829	0.708338	1	Neu2
ENSMUSG00000073722	1.59349	0.723265	2.46372	3.40638	1.76824	0.428316	1	4931408C20Rik
ENSMUSG00000040013	1.69874	0.771429	2.62604	3.40413	1.76729	0.502867	1	Fkbp6
ENSMUSG00000078815	8.34452	3.79399	12.895	3.39881	1.76503	0.021702	1	Cacng6
ENSMUSG00000081096	5.12256	2.32927	7.91584	3.39842	1.76486	0.082867	1
ENSMUSG00000064115	7.26396	3.3157	11.2122	3.38155	1.75769	0.182157	1	Cadm2
ENSMUSG00000097840	1.58384	0.723265	2.44442	3.3797	1.75689	0.429589	1
ENSMUSG00000028017	383.443	175.179	591.706	3.37771	1.75605	0.0154539	1	Egf
ENSMUSG00000019932	0.834989	0.381968	1.28801	3.37204	1.75362	0.687802	1	Kera
ENSMUSG00000076465	0.834989	0.381968	1.28801	3.37204	1.75362	0.687802	1
ENSMUSG00000024957	0.848387	0.389461	1.30731	3.35673	1.74705	0.685278	1	Kcnk4
ENSMUSG00000041605	0.725802	0.333804	1.1178	3.34867	1.74359	0.710516	1	5730559C18Rik
ENSMUSG00000022878	8.134	3.74583	12.5222	3.34296	1.74113	0.0699712	1	Adipoq
ENSMUSG00000091191	3.96845	1.8285	6.10841	3.34067	1.74014	0.141556	1
ENSMUSG00000092261	1.56191	0.723265	2.40055	3.31904	1.73077	0.432523	1
ENSMUSG00000082063	3.00254	1.39087	4.61421	3.31749	1.73009	0.23871	1
ENSMUSG00000078600	0.822707	0.381968	1.26345	3.30773	1.72584	0.690162	1	1700092K14Rik
ENSMUSG00000081641	0.822707	0.381968	1.26345	3.30773	1.72584	0.690162	1
ENSMUSG00000097736	0.822707	0.381968	1.26345	3.30773	1.72584	0.690162	1	9530059O14Rik
ENSMUSG00000028971	0.838736	0.389461	1.28801	3.30716	1.72559	0.687091	1	Cort
ENSMUSG00000029361	33.6507	15.6659	51.6355	3.29604	1.72073	0.0308179	1	Nos1
ENSMUSG00000088262	3.28887	1.53536	5.04238	3.28416	1.71552	0.167063	1
ENSMUSG00000088001	1.53997	0.723265	2.35668	3.25839	1.70416	0.43552	1
ENSMUSG00000093357	0.813055	0.381968	1.24414	3.25719	1.70363	0.692049	1
ENSMUSG00000097142	0.813055	0.381968	1.24414	3.25719	1.70363	0.692049	1
ENSMUSG00000083332	2.23176	1.04958	3.41393	3.25268	1.70163	0.344782	1
ENSMUSG00000097396	3.97323	1.87666	6.0698	3.23436	1.69348	0.141367	1
ENSMUSG00000025481	15.7772	7.45848	24.0959	3.23066	1.69183	0.00360608	1	Urah
ENSMUSG00000078161	3.84802	1.82101	5.87503	3.22626	1.68986	0.146479	1
ENSMUSG00000095205	2.92972	1.39087	4.46856	3.21277	1.68382	0.243585	1
ENSMUSG00000043020	0.803403	0.381968	1.22484	3.20665	1.68107	0.693964	1	Wdr63
ENSMUSG00000082283	0.803403	0.381968	1.22484	3.20665	1.68107	0.693964	1
ENSMUSG00000082894	0.803403	0.381968	1.22484	3.20665	1.68107	0.693964	1
ENSMUSG00000095937	0.803403	0.381968	1.22484	3.20665	1.68107	0.693964	1
ENSMUSG00000040866	0.816802	0.389461	1.24414	3.19452	1.6756	0.691313	1	Rsph6a
ENSMUSG00000059305	0.816802	0.389461	1.24414	3.19452	1.6756	0.691313	1	Vpreb1
ENSMUSG00000081885	0.800773	0.381968	1.21958	3.19288	1.67486	0.694492	1
ENSMUSG00000085307	0.800773	0.381968	1.21958	3.19288	1.67486	0.694492	1	Gm11525
ENSMUSG00000094215	0.800773	0.381968	1.21958	3.19288	1.67486	0.694492	1
ENSMUSG00000025431	2.43306	1.16089	3.70524	3.19172	1.67433	0.243472	1	Crisp1
ENSMUSG00000065374	1.39677	0.667609	2.12592	3.18439	1.67102	0.530359	1
ENSMUSG00000061619	3.12596	1.49469	4.75723	3.18274	1.67027	0.201119	1
ENSMUSG00000085996	1.51233	0.723265	2.3014	3.18195	1.66991	0.598992	1
ENSMUSG00000046991	1.51102	0.723265	2.29877	3.17832	1.66827	0.439576	1	Wdr27
ENSMUSG00000055602	1.60792	0.771429	2.44442	3.16869	1.66389	0.426436	1	Tcp10b
ENSMUSG00000030546	3.9048	1.87666	5.93294	3.16143	1.66058	0.170167	1	Plin1
ENSMUSG00000092178	1.48534	0.715772	2.2549	3.15031	1.65549	0.443271	1
ENSMUSG00000040113	27.4115	13.2178	41.6051	3.14765	1.65427	0.000587531	1	Mettl11b
ENSMUSG00000077993	0.80715	0.389461	1.22484	3.14496	1.65304	0.693217	1
ENSMUSG00000094708	1.59827	0.771429	2.42511	3.14366	1.65245	0.427691	1
ENSMUSG00000026464	0.791121	0.381968	1.20027	3.14234	1.65184	0.696446	1	Zc3h11a
ENSMUSG00000027855	0.791121	0.381968	1.20027	3.14234	1.65184	0.696446	1	Sycp1
ENSMUSG00000076922	0.791121	0.381968	1.20027	3.14234	1.65184	0.696446	1
ENSMUSG00000077620	0.791121	0.381968	1.20027	3.14234	1.65184	0.696446	1
ENSMUSG00000082314	0.791121	0.381968	1.20027	3.14234	1.65184	0.696446	1
ENSMUSG00000085448	0.791121	0.381968	1.20027	3.14234	1.65184	0.696446	1
ENSMUSG00000090038	1.58224	0.763936	2.40055	3.14234	1.65184	0.4298	1	LOC102635191
ENSMUSG00000092083	0.791121	0.381968	1.20027	3.14234	1.65184	0.696446	1	Kcnb2
ENSMUSG00000072952	1.61167	0.778922	2.44442	3.1382	1.64994	0.425952	1	Gm5878
ENSMUSG00000056031	0.804519	0.389461	1.21958	3.13145	1.64683	0.693741	1
ENSMUSG00000078907	0.804519	0.389461	1.21958	3.13145	1.64683	0.693741	1	Fam186b
ENSMUSG00000088068	0.804519	0.389461	1.21958	3.13145	1.64683	0.693741	1
ENSMUSG00000027793	1.4904	0.723265	2.25753	3.1213	1.64215	0.517266	1	Cc1
ENSMUSG00000038932	1.48075	0.723265	2.23822	3.09461	1.62976	0.518561	1	Tcfl5
ENSMUSG00000082458	0.781469	0.381968	1.18097	3.09181	1.62845	0.69843	1
ENSMUSG00000082727	0.781469	0.381968	1.18097	3.09181	1.62845	0.69843	1
ENSMUSG00000032564	2.27561	1.11273	3.4385	3.09016	1.62768	0.340685	1	Cpne4
ENSMUSG00000082125	0.778839	0.381968	1.17571	3.07803	1.62201	0.727708	1
ENSMUSG00000091306	0.778839	0.381968	1.17571	3.07803	1.62201	0.727708	1
ENSMUSG00000073985	5.18443	2.54427	7.82459	3.07538	1.62076	0.107529	1
ENSMUSG00000089195	2.23653	1.09774	3.37533	3.0748	1.62049	0.344329	1
ENSMUSG00000064565	1.35553	0.667609	2.04345	3.06085	1.61393	0.536526	1
ENSMUSG00000068105	1.35553	0.667609	2.04345	3.06085	1.61393	0.536526	1	Tnfrsf13c
ENSMUSG00000052281	1.46846	0.723265	2.21366	3.06065	1.61384	0.520227	1
ENSMUSG00000033508	1.56405	0.771429	2.35668	3.05496	1.61115	0.432233	1	Asprv1
ENSMUSG00000091119	2.12735	1.04958	3.20512	3.05372	1.61057	0.355079	1	Ccdc152
ENSMUSG00000094500	0.771818	0.381968	1.16167	3.04127	1.60467	0.700446	1	Smim18
ENSMUSG00000028310	1.44541	0.715772	2.17505	3.03875	1.60348	0.523407	1	Ppp3r2
ENSMUSG00000084029	0.673595	0.333804	1.01339	3.03587	1.60211	0.866329	1
ENSMUSG00000083705	1.541	0.763936	2.31807	3.03438	1.6014	0.435378	1
ENSMUSG00000073400	3.11144	1.54286	4.68002	3.03334	1.60091	0.20198	1	Trim10
ENSMUSG00000044083	0.785216	0.389461	1.18097	3.03232	1.60042	0.697656	1	Efcab8
ENSMUSG00000060268	0.785216	0.389461	1.18097	3.03232	1.60042	0.697656	1	Gm1661
ENSMUSG00000077387	0.785216	0.389461	1.18097	3.03232	1.60042	0.697656	1
ENSMUSG00000088695	0.785216	0.389461	1.18097	3.03232	1.60042	0.697656	1
ENSMUSG00000050830	5.12827	2.54427	7.71228	3.03123	1.5999	0.307397	1	Vwc2
ENSMUSG00000064389	1.5544	0.771429	2.33738	3.02993	1.59929	0.433542	1
ENSMUSG00000018865	2.32359	1.1534	3.49378	3.02913	1.5989	0.290674	1	Sult4a1
ENSMUSG00000084536	2.01684	1.00141	3.03227	3.02799	1.59836	0.421464	1
ENSMUSG00000027401	0.769187	0.381968	1.15641	3.0275	1.59813	0.701001	1	Tgm3
ENSMUSG00000085523	0.769187	0.381968	1.15641	3.0275	1.59813	0.701001	1
ENSMUSG00000097430	0.769187	0.381968	1.15641	3.0275	1.59813	0.701001	1
ENSMUSG00000022026	0.782585	0.389461	1.17571	3.01881	1.59398	0.726723	1	Olfm4
ENSMUSG00000089030	0.782585	0.389461	1.17571	3.01881	1.59398	0.726723	1
ENSMUSG00000089260	0.782585	0.389461	1.17571	3.01881	1.59398	0.726723	1
ENSMUSG00000090141	2.30054	1.1459	3.45518	3.01524	1.59227	0.292745	1	Gm614
ENSMUSG00000034117	1.43313	0.715772	2.15049	3.00443	1.58709	0.52513	1	Ptgdr2
ENSMUSG00000064917	3.42102	1.71719	5.12485	2.98445	1.57746	0.241401	1
ENSMUSG00000045532	0.775564	0.389461	1.16167	2.98276	1.57665	0.69966	1	C1ql1
ENSMUSG00000088170	0.775564	0.389461	1.16167	2.98276	1.57665	0.69966	1
ENSMUSG00000093490	0.775564	0.389461	1.16167	2.98276	1.57665	0.69966	1
ENSMUSG00000097253	0.775564	0.389461	1.16167	2.98276	1.57665	0.69966	1
ENSMUSG00000086390	4.57718	2.2993	6.85507	2.98137	1.57598	0.123083	1
ENSMUSG00000037579	1.42348	0.715772	2.13119	2.97746	1.57408	0.5265	1	Kcnh3
ENSMUSG00000005232	0.759535	0.381968	1.1371	2.97696	1.57384	0.703059	1	G6pc2
ENSMUSG00000005640	0.759535	0.381968	1.1371	2.97696	1.57384	0.703059	1	Insrr
ENSMUSG00000036815	0.759535	0.381968	1.1371	2.97696	1.57384	0.703059	1	Dpp10
ENSMUSG00000073234	0.759535	0.381968	1.1371	2.97696	1.57384	0.703059	1	Gm8773
ENSMUSG00000081537	0.759535	0.381968	1.1371	2.97696	1.57384	0.703059	1
ENSMUSG00000083149	0.759535	0.381968	1.1371	2.97696	1.57384	0.703059	1
ENSMUSG00000092762	0.759535	0.381968	1.1371	2.97696	1.57384	0.703059	1
ENSMUSG00000090235	1.43688	0.723265	2.15049	2.97331	1.57207	0.524602	1
ENSMUSG00000086424	1.42085	0.715772	2.12592	2.97011	1.57052	0.526875	1	LOC102638208
ENSMUSG00000096923	2.76082	1.39087	4.13077	2.96991	1.57042	0.291538	1
ENSMUSG00000041567	0.772934	0.389461	1.15641	2.96925	1.5701	0.700211	1	Serpi12
ENSMUSG00000025479	22.6086	11.4269	33.7902	2.95706	1.56417	0.148111	1	Cyp2e1
ENSMUSG00000010044	3.83328	1.93981	5.72675	2.95222	1.5618	0.167558	1	Zmynd10
ENSMUSG00000054446	3.68521	1.86917	5.50125	2.94315	1.55736	0.198573	1	Cpa1
ENSMUSG00000082809	18.4477	9.35749	27.5379	2.94287	1.55722	0.065535	1
ENSMUSG00000085228	2.16371	1.09774	3.22968	2.94212	1.55686	0.351402	1
ENSMUSG00000074981	1.31429	0.667609	1.96098	2.93731	1.5545	0.54296	1
ENSMUSG00000026241	0.749884	0.381968	1.1178	2.92642	1.54914	0.705149	1	Nppc
ENSMUSG00000064125	0.763282	0.389461	1.1371	2.91968	1.54581	0.702256	1	BC068157
ENSMUSG00000074052	0.763282	0.389461	1.1371	2.91968	1.54581	0.702256	1
ENSMUSG00000082920	0.763282	0.389461	1.1371	2.91968	1.54581	0.702256	1
ENSMUSG00000086556	0.763282	0.389461	1.1371	2.91968	1.54581	0.702256	1
ENSMUSG00000094433	0.763282	0.389461	1.1371	2.91968	1.54581	0.702256	1
ENSMUSG00000097372	0.763282	0.389461	1.1371	2.91968	1.54581	0.702256	1
ENSMUSG00000024211	1.40155	0.715772	2.08732	2.91618	1.54408	0.529661	1	Grm8
ENSMUSG00000092701	1.40155	0.715772	2.08732	2.91618	1.54408	0.529661	1
ENSMUSG00000084717	1.41494	0.723265	2.10662	2.91265	1.54233	0.527722	1
ENSMUSG00000064398	2.05321	1.04958	3.05684	2.91245	1.54223	0.417576	1
ENSMUSG00000035448	0.651661	0.333804	0.969518	2.90445	1.53826	0.868159	1	Ccr3
ENSMUSG00000053957	0.651661	0.333804	0.969518	2.90445	1.53826	0.868159	1
ENSMUSG00000058246	0.651661	0.333804	0.969518	2.90445	1.53826	0.868159	1
ENSMUSG00000083237	0.651661	0.333804	0.969518	2.90445	1.53826	0.868159	1
ENSMUSG00000083830	0.651661	0.333804	0.969518	2.90445	1.53826	0.868159	1
ENSMUSG00000010311	2.26548	1.16089	3.37007	2.903	1.53755	0.34162	1	Optc
ENSMUSG00000093403	1.51823	0.778922	2.25753	2.89827	1.53519	0.5151	1	Mir5616
ENSMUSG00000034339	0.740232	0.381968	1.0985	2.87589	1.52401	0.724232	1
ENSMUSG00000064358	0.740232	0.381968	1.0985	2.87589	1.52401	0.724232	1	COX3
ENSMUSG00000051648	3.52382	1.82101	5.22663	2.87019	1.52115	0.235468	1	Kctd19
ENSMUSG00000093181	0.75363	0.389461	1.1178	2.87012	1.52111	0.704334	1
ENSMUSG00000086961	2.68931	1.39087	3.98775	2.86708	1.51958	0.339373	1
ENSMUSG00000064952	1.37961	0.715772	2.04345	2.85489	1.51343	0.532893	1
ENSMUSG00000043811	74.9399	38.8833	110.996	2.8546	1.51329	0.0195734	1	Rtn4r
ENSMUSG00000084939	2.22181	1.1534	3.29022	2.85263	1.51229	0.52745	1
ENSMUSG00000013418	0.64201	0.333804	0.950215	2.84662	1.50925	0.869709	1	B4galnt2
ENSMUSG00000020804	0.64201	0.333804	0.950215	2.84662	1.50925	0.869709	1	Aat
ENSMUSG00000080760	0.64201	0.333804	0.950215	2.84662	1.50925	0.869709	1
ENSMUSG00000094626	0.64201	0.333804	0.950215	2.84662	1.50925	0.869709	1	Cecr6
ENSMUSG00000083100	2.78163	1.44653	4.11673	2.84593	1.5089	0.289943	1
ENSMUSG00000081396	2.94976	1.53536	4.36415	2.84242	1.50712	0.277768	1
ENSMUSG00000082377	6.17608	3.21937	9.1328	2.83682	1.50428	0.166574	1
ENSMUSG00000053141	11.6559	6.08246	17.2294	2.83263	1.50214	0.0259406	1	Ptprt
ENSMUSG00000088378	1.36996	0.715772	2.02415	2.82792	1.49974	0.534338	1
ENSMUSG00000054934	4.04108	2.11414	5.96803	2.82291	1.49718	0.204229	1	Kcnmb4
ENSMUSG00000097146	2.12602	1.11273	3.13931	2.82128	1.49635	0.410099	1
ENSMUSG00000064597	0.743979	0.389461	1.0985	2.82056	1.49598	0.723239	1
ENSMUSG00000094414	7.89047	4.13529	11.6456	2.81616	1.49373	0.0551872	1
ENSMUSG00000083932	1.47061	0.771429	2.16979	2.81269	1.49195	0.519934	1
ENSMUSG00000084128	18.4359	9.68394	27.1878	2.80751	1.48929	0.00510977	1	Esrp2
ENSMUSG00000027776	4.01081	2.11414	5.90748	2.79427	1.48247	0.232628	1	Il12a
ENSMUSG00000002324	5.52565	2.91875	8.13256	2.78632	1.47836	0.126642	1	Rec8
ENSMUSG00000073529	1.26209	0.667609	1.85656	2.78091	1.47556	0.641444	1
ENSMUSG00000049511	1.45833	0.771429	2.14523	2.78085	1.47553	0.521616	1	Htr1b
ENSMUSG00000021797	0.629727	0.333804	0.92565	2.77303	1.47146	0.871722	1	9230112D13Rik
ENSMUSG00000065320	0.629727	0.333804	0.92565	2.77303	1.47146	0.871722	1
ENSMUSG00000090494	0.629727	0.333804	0.92565	2.77303	1.47146	0.871722	1
ENSMUSG00000018581	1.88216	1.00141	2.76291	2.75901	1.46415	0.501924	1	Dh11
ENSMUSG00000041523	1.44868	0.771429	2.12592	2.75583	1.46249	0.522952	1	Upk2
ENSMUSG00000080543	2.81648	1.50219	4.13077	2.74984	1.45935	0.287316	1
ENSMUSG00000031760	9.73421	5.19236	14.2761	2.74943	1.45913	0.0439488	1	Mt3
ENSMUSG00000096296	1.2498	0.667609	1.832	2.74412	1.45634	0.643243	1	Snord88c
ENSMUSG00000083897	2.18412	1.16838	3.19986	2.73871	1.45349	0.349381	1
ENSMUSG00000091587	3.57461	1.91733	5.23189	2.72873	1.44823	0.232652	1
ENSMUSG00000097134	2.68181	1.43904	3.92458	2.72722	1.44743	0.339981	1
ENSMUSG00000074217	4.63631	2.48861	6.784	2.72602	1.44679	0.197386	1	2210011C24Rik
ENSMUSG00000039851	1.24015	0.667609	1.81269	2.7152	1.44106	0.644674	1	4932438H23Rik
ENSMUSG00000041544	0.620076	0.333804	0.906347	2.7152	1.44106	0.873337	1	Ptchd2
ENSMUSG00000081452	0.620076	0.333804	0.906347	2.7152	1.44106	0.873337	1
ENSMUSG00000083215	0.620076	0.333804	0.906347	2.7152	1.44106	0.873337	1
ENSMUSG00000084557	0.620076	0.333804	0.906347	2.7152	1.44106	0.873337	1
ENSMUSG00000085689	0.620076	0.333804	0.906347	2.7152	1.44106	0.873337	1
ENSMUSG00000086061	1.86023	1.00141	2.71904	2.7152	1.44106	0.504435	1
ENSMUSG00000090358	0.620076	0.333804	0.906347	2.7152	1.44106	0.873337	1
ENSMUSG00000092713	0.620076	0.333804	0.906347	2.7152	1.44106	0.873337	1
ENSMUSG00000064956	3.49485	1.88416	5.10555	2.70973	1.43815	0.237107	1
ENSMUSG00000080773	2.06285	1.11273	3.01297	2.70773	1.43709	0.416563	1
ENSMUSG00000081853	1.42937	0.771429	2.08732	2.70578	1.43605	0.525662	1
ENSMUSG00000052616	1.31907	0.715772	1.92237	2.68573	1.42531	0.661743	1	Ccdc79
ENSMUSG00000083196	3.26635	1.77284	4.75986	2.68487	1.42485	0.349518	1
ENSMUSG00000021206	1.31775	0.715772	1.91973	2.68204	1.42333	0.633574	1
ENSMUSG00000074121	1.31775	0.715772	1.91973	2.68204	1.42333	0.633574	1	Ntf5
ENSMUSG00000027446	1.22787	0.667609	1.78813	2.67841	1.42138	0.646516	1	9230104L09Rik
ENSMUSG00000027581	3.56655	1.93981	5.19328	2.67721	1.42073	0.252417	1	Stmn3
ENSMUSG00000036395	9.36624	5.09604	13.6364	2.67589	1.42002	0.0637519	1	Glb1l2
ENSMUSG00000085678	2.03015	1.10523	2.95506	2.6737	1.41884	0.420029	1
ENSMUSG00000086313	3.96909	2.1623	5.77588	2.67117	1.41747	0.234731	1
ENSMUSG00000056215	4.1704	2.27362	6.06718	2.66851	1.41604	0.175123	1	Lrguk
ENSMUSG00000022991	0.610424	0.333804	0.887043	2.65737	1.41	0.874983	1	Lalba
ENSMUSG00000030827	0.610424	0.333804	0.887043	2.65737	1.41	0.874983	1	Fgf21
ENSMUSG00000055748	0.610424	0.333804	0.887043	2.65737	1.41	0.874983	1	Gsdmc4
ENSMUSG00000065602	0.610424	0.333804	0.887043	2.65737	1.41	0.874983	1
ENSMUSG00000071553	1.22085	0.667609	1.77409	2.65737	1.41	0.647579	1	Cpa2
ENSMUSG00000079264	0.610424	0.333804	0.887043	2.65737	1.41	0.874983	1
ENSMUSG00000081303	0.610424	0.333804	0.887043	2.65737	1.41	0.874983	1
ENSMUSG00000084026	0.610424	0.333804	0.887043	2.65737	1.41	0.874983	1
ENSMUSG00000089024	0.610424	0.333804	0.887043	2.65737	1.41	0.874983	1
ENSMUSG00000093048	0.610424	0.333804	0.887043	2.65737	1.41	0.874983	1
ENSMUSG00000093241	0.610424	0.333804	0.887043	2.65737	1.41	0.874983	1
ENSMUSG00000097250	0.610424	0.333804	0.887043	2.65737	1.41	0.874983	1
ENSMUSG00000097817	0.610424	0.333804	0.887043	2.65737	1.41	0.874983	1
ENSMUSG00000091345	113.931	62.3246	165.537	2.65605	1.40928	0.19869	1	Col6a5
ENSMUSG00000063600	1.42347	0.778922	2.06801	2.65497	1.4087	0.526501	1	Egfem1
ENSMUSG00000022829	0.697677	0.381968	1.01339	2.65307	1.40766	0.862248	1	Stxbp5l
ENSMUSG00000089839	0.697677	0.381968	1.01339	2.65307	1.40766	0.862248	1
ENSMUSG00000091438	0.697677	0.381968	1.01339	2.65307	1.40766	0.862248	1
ENSMUSG00000065086	2.64169	1.44653	3.83684	2.65244	1.40732	0.343278	1
ENSMUSG00000085724	2.81751	1.54286	4.09216	2.65233	1.40726	0.287239	1
ENSMUSG00000089941	8.37472	4.5879	12.1615	2.65078	1.40642	0.0979758	1
ENSMUSG00000076987	0.607793	0.333804	0.881782	2.64161	1.40142	0.875437	1
ENSMUSG00000085975	0.607793	0.333804	0.881782	2.64161	1.40142	0.875437	1	LOC102636022
ENSMUSG00000092243	0.607793	0.333804	0.881782	2.64161	1.40142	0.875437	1	Gm7030
ENSMUSG00000024131	4.7141	2.59243	6.83577	2.63681	1.3988	0.17228	1	Slc3a1
ENSMUSG00000085427	28.0992	15.4734	40.7251	2.63194	1.39613	0.00206708	1	6430710C18Rik
ENSMUSG00000022181	12.0884	6.65708	17.5198	2.63175	1.39602	0.0326312	1	C6
ENSMUSG00000087816	3.02756	1.66902	4.38609	2.62794	1.39393	0.340301	1
ENSMUSG00000006538	1.39779	0.771429	2.02415	2.62389	1.39171	0.53021	1	Ihh
ENSMUSG00000044667	8.73775	4.82525	12.6502	2.62168	1.39049	0.0867412	1	Lppr4
ENSMUSG00000079137	1.20857	0.667609	1.74952	2.62058	1.38989	0.64946	1
ENSMUSG00000086050	5.68826	3.15622	8.22029	2.60447	1.38099	0.169025	1
ENSMUSG00000084378	4.10966	2.28111	5.9382	2.60321	1.38029	0.20101	1
ENSMUSG00000085095	3.20692	1.78034	4.63351	2.60261	1.37996	0.32746	1
ENSMUSG00000079391	0.701424	0.389461	1.01339	2.60202	1.37963	0.861658	1
ENSMUSG00000080622	0.701424	0.389461	1.01339	2.60202	1.37963	0.861658	1
ENSMUSG00000095649	2.08956	1.16089	3.01823	2.59993	1.37847	0.413793	1
ENSMUSG00000027077	1.38814	0.771429	2.00484	2.59887	1.37788	0.531629	1	Smtnl1
ENSMUSG00000032719	2.68901	1.49469	3.88333	2.59808	1.37745	0.489863	1	Sbspon
ENSMUSG00000023216	2.07353	1.1534	2.99366	2.59552	1.37602	0.415448	1	Epb4.2
ENSMUSG00000021359	1.28617	0.715772	1.85656	2.59379	1.37506	0.637984	1	Tfap2a
ENSMUSG00000034919	0.598142	0.333804	0.862479	2.58379	1.36949	0.877122	1	Ttc22
ENSMUSG00000053182	0.598142	0.333804	0.862479	2.58379	1.36949	0.877122	1	Gm609
ENSMUSG00000068062	0.598142	0.333804	0.862479	2.58379	1.36949	0.877122	1	Gm14164
ENSMUSG00000082079	0.598142	0.333804	0.862479	2.58379	1.36949	0.877122	1
ENSMUSG00000082165	0.598142	0.333804	0.862479	2.58379	1.36949	0.877122	1
ENSMUSG00000030769	3.36719	1.88416	4.85023	2.57422	1.36413	0.278032	1	Slc5a11
ENSMUSG00000003863	1.39188	0.778922	2.00484	2.57387	1.36394	0.531076	1	Ppfia3
ENSMUSG00000030708	1.87466	1.04958	2.69974	2.57222	1.36301	0.502778	1	Djb13
ENSMUSG00000049985	24.0955	13.4926	34.6983	2.57164	1.36269	0.101279	1	Ankrd55
ENSMUSG00000055872	1.37717	0.771429	1.9829	2.57043	1.36201	0.646193	1
ENSMUSG00000064281	3.74668	2.09915	5.39421	2.56971	1.3616	0.278074	1
ENSMUSG00000097463	1.27388	0.715772	1.832	2.55947	1.35584	0.639738	1
ENSMUSG00000080198	1.97905	1.11273	2.84538	2.55713	1.35452	0.491317	1
ENSMUSG00000065544	1.8784	1.05707	2.69974	2.55398	1.35275	0.502351	1
ENSMUSG00000042672	3.43251	1.93232	4.9327	2.55274	1.35204	0.274035	1	Dcst1
ENSMUSG00000079620	6.66679	3.75332	9.58026	2.55247	1.3519	0.140137	1	Muc4
ENSMUSG00000030592	7.6583	4.32461	10.992	2.54173	1.34581	0.125825	1	Ryr1
ENSMUSG00000046719	3.93881	2.22545	5.65216	2.53978	1.3447	0.267461	1	Nxph3
ENSMUSG00000089096	1.9694	1.11273	2.82608	2.53978	1.3447	0.49234	1
ENSMUSG00000025876	4.57435	2.58494	6.56377	2.53923	1.34439	0.277325	1	Unc5a
ENSMUSG00000027867	0.675743	0.381968	0.969518	2.53822	1.34382	0.864411	1	Spag17
ENSMUSG00000043003	24.537	13.8748	35.1992	2.53693	1.34308	0.0148578	1	Rasef
ENSMUSG00000027297	1.26423	0.715772	1.81269	2.5325	1.34056	0.641132	1	Ltk
ENSMUSG00000063887	0.58849	0.333804	0.843176	2.52596	1.33683	0.87884	1	Nlgn1
ENSMUSG00000064340	1.17698	0.667609	1.68635	2.52596	1.33683	0.654414	1
ENSMUSG00000075042	0.58849	0.333804	0.843176	2.52596	1.33683	0.87884	1
ENSMUSG00000078490	0.58849	0.333804	0.843176	2.52596	1.33683	0.87884	1	C030017K20Rik
ENSMUSG00000081941	0.58849	0.333804	0.843176	2.52596	1.33683	0.87884	1
ENSMUSG00000082453	0.58849	0.333804	0.843176	2.52596	1.33683	0.87884	1
ENSMUSG00000034209	30.6346	17.4056	43.8635	2.52008	1.33347	0.0216446	1	Rasl10a
ENSMUSG00000050645	2.02966	1.1534	2.90593	2.51945	1.33311	0.420081	1	Defb19
ENSMUSG00000085182	2.62321	1.49469	3.75173	2.51003	1.32771	0.394619	1
ENSMUSG00000035486	7.19697	4.10211	10.2918	2.50891	1.32706	0.159677	1	Plk5
ENSMUSG00000022523	7.46571	4.26146	10.67	2.50383	1.32414	0.124833	1	Fgf12
ENSMUSG00000085196	2.51993	1.43904	3.60082	2.50224	1.32322	0.403458	1
ENSMUSG00000061815	26.1706	14.9501	37.391	2.50105	1.32253	0.0079153	1	Rufy4
ENSMUSG00000056729	1.94747	1.11273	2.78221	2.50036	1.32213	0.49469	1
ENSMUSG00000087373	4.62017	2.6406	6.59975	2.49934	1.32155	0.198049	1
ENSMUSG00000029862	106.11	60.7747	151.446	2.49192	1.31726	0.0689859	1	Clcn1
ENSMUSG00000034837	0.67949	0.389461	0.969518	2.48938	1.31579	0.863843	1	Gt1
ENSMUSG00000082650	0.67949	0.389461	0.969518	2.48938	1.31579	0.863843	1
ENSMUSG00000084426	0.67949	0.389461	0.969518	2.48938	1.31579	0.863843	1
ENSMUSG00000022269	2.51028	1.43904	3.58152	2.48883	1.31547	0.404313	1	2011-03-01
ENSMUSG00000097335	1.83079	1.04958	2.612	2.48862	1.31535	0.507874	1
ENSMUSG00000081173	1.34558	0.771429	1.91973	2.48854	1.3153	0.629806	1
ENSMUSG00000016529	0.666091	0.381968	0.950215	2.48768	1.3148	0.865894	1	Il10
ENSMUSG00000026413	0.666091	0.381968	0.950215	2.48768	1.3148	0.865894	1	Pkp1
ENSMUSG00000043924	3.58904	2.05848	5.11959	2.48707	1.31445	0.323774	1	Ncmap
ENSMUSG00000066196	5.94382	3.41203	8.47561	2.48404	1.31269	0.14391	1	Spag8
ENSMUSG00000089798	4.98148	2.86309	7.09987	2.47979	1.31022	0.200191	1	1700028K03Rik
ENSMUSG00000019737	5.859	3.37136	8.34664	2.47575	1.30787	0.163734	1	Syne4
ENSMUSG00000061702	3.9225	2.25863	5.58636	2.47334	1.30646	0.237128	1	Tmem91
ENSMUSG00000089070	3.85127	2.21796	5.48457	2.4728	1.30615	0.44038	1
ENSMUSG00000053886	793.697	457.258	1130.14	2.47155	1.30542	0.0101481	1	Sh2d4a
ENSMUSG00000080396	2.4846	1.43154	3.53765	2.47121	1.30522	0.406613	1
ENSMUSG00000087351	1.2423	0.715772	1.76883	2.47121	1.30522	0.644354	1
ENSMUSG00000022809	0.578838	0.333804	0.823872	2.46813	1.30342	0.880592	1	Nr1i2
ENSMUSG00000032739	0.578838	0.333804	0.823872	2.46813	1.30342	0.880592	1	Pram1
ENSMUSG00000065560	0.578838	0.333804	0.823872	2.46813	1.30342	0.880592	1
ENSMUSG00000081704	0.578838	0.333804	0.823872	2.46813	1.30342	0.880592	1
ENSMUSG00000093001	0.578838	0.333804	0.823872	2.46813	1.30342	0.880592	1
ENSMUSG00000095819	0.578838	0.333804	0.823872	2.46813	1.30342	0.880592	1
ENSMUSG00000097740	4.5897	2.64809	6.53132	2.46642	1.30242	0.199313	1
ENSMUSG00000018822	4.51716	2.60742	6.4269	2.46485	1.3015	0.227845	1	Sfrp5
ENSMUSG00000039419	1.23967	0.715772	1.76356	2.46386	1.30092	0.723878	1	Cntp2
ENSMUSG00000071470	14.0562	8.12275	19.9896	2.46094	1.29921	0.119919	1	Ccnb1ip1
ENSMUSG00000034579	5.46058	3.15622	7.76494	2.4602	1.29877	0.245417	1	Pla2g3
ENSMUSG00000032368	1.24868	0.723265	1.77409	2.45288	1.29448	0.64341	1	Zic1
ENSMUSG00000048520	4.39083	2.54427	6.23739	2.45154	1.29369	0.233618	1	Fbxl13
ENSMUSG00000038665	17.9584	10.4146	25.5023	2.44872	1.29203	0.102843	1	Dgki
ENSMUSG00000024340	3.14984	1.8285	4.47119	2.44528	1.29	0.381524	1	Btnl2
ENSMUSG00000022376	12.0192	6.98019	17.0583	2.44381	1.28913	0.0434184	1	Adcy8
ENSMUSG00000013562	0.669838	0.389461	0.950215	2.43982	1.28677	0.865315	1
ENSMUSG00000089853	0.669838	0.389461	0.950215	2.43982	1.28677	0.865315	1
ENSMUSG00000053714	1.81523	1.05707	2.57339	2.43446	1.2836	0.509724	1
ENSMUSG00000082651	3.13625	1.8285	4.444	2.43041	1.2812	0.332373	1
ENSMUSG00000041202	32.2452	18.8072	45.6832	2.42903	1.28038	0.0061439	1	Pla2g2d
ENSMUSG00000059244	1.96406	1.1459	2.78221	2.42796	1.27975	0.492909	1
ENSMUSG00000085272	28.9165	16.8719	40.9611	2.42777	1.27963	0.256363	1	Sbk3
ENSMUSG00000053583	3.88106	2.26612	5.49599	2.42528	1.27815	0.270553	1
ENSMUSG00000061780	28.8212	16.8375	40.805	2.42346	1.27707	0.153918	1	Cfd
ENSMUSG00000003974	1.30762	0.763936	1.8513	2.42337	1.27702	0.634973	1	Grm3
ENSMUSG00000054156	0.653809	0.381968	0.92565	2.42337	1.27702	0.867818	1	Gm4894
ENSMUSG00000087047	0.653809	0.381968	0.92565	2.42337	1.27702	0.867818	1
ENSMUSG00000087549	0.653809	0.381968	0.92565	2.42337	1.27702	0.867818	1
ENSMUSG00000026401	1.23639	0.723265	1.74952	2.41892	1.27436	0.645235	1	Daf2
ENSMUSG00000087496	1.23639	0.723265	1.74952	2.41892	1.27436	0.645235	1
ENSMUSG00000036925	4.44059	2.59993	6.28126	2.41594	1.27258	0.231307	1	Spt1
ENSMUSG00000002588	2.6203	1.53536	3.70524	2.41326	1.27098	0.34773	1	Pon1
ENSMUSG00000065360	1.23376	0.723265	1.74426	2.41165	1.27002	0.645629	1
ENSMUSG00000077614	4.88915	2.87058	6.90772	2.40638	1.26687	0.228121	1
ENSMUSG00000080772	4.99618	2.93373	7.05863	2.40602	1.26665	0.223696	1
ENSMUSG00000082204	1.31136	0.771429	1.8513	2.39983	1.26293	0.634455	1
ENSMUSG00000045746	6.19086	3.64201	8.73972	2.3997	1.26285	0.166223	1
ENSMUSG00000060715	1.29797	0.763936	1.832	2.3981	1.26189	0.63632	1	1700019A02Rik
ENSMUSG00000085710	3.19829	1.88416	4.51243	2.39494	1.25999	0.32805	1
ENSMUSG00000010080	880.365	518.924	1241.81	2.39304	1.25884	0.00440756	1	Epn3
ENSMUSG00000089051	1.22674	0.723265	1.73022	2.39223	1.25836	0.646686	1
ENSMUSG00000061086	132.455	78.1475	186.762	2.38986	1.25693	0.225941	1	Myl4
ENSMUSG00000010651	2.91983	1.72468	4.11498	2.38594	1.25456	0.682406	1	Acaa1b
ENSMUSG00000035580	3.25724	1.92483	4.58964	2.38445	1.25365	0.324071	1	Kcnh8
ENSMUSG00000064612	2.59266	1.53536	3.64995	2.37725	1.2493	0.397176	1
ENSMUSG00000019865	0.657556	0.389461	0.92565	2.37675	1.24899	0.867226	1	Nmbr
ENSMUSG00000083985	0.657556	0.389461	0.92565	2.37675	1.24899	0.867226	1
ENSMUSG00000087621	0.657556	0.389461	0.92565	2.37675	1.24899	0.867226	1	1700003G18Rik
ENSMUSG00000097828	116.92	69.2739	164.566	2.37558	1.24828	0.0045372	1
ENSMUSG00000046408	3.2355	1.91733	4.55367	2.375	1.24793	0.311438	1	1700067K01Rik
ENSMUSG00000028716	1.30171	0.771429	1.832	2.37481	1.24781	0.635795	1	Pdzk1ip1
ENSMUSG00000065847	1.94587	1.1534	2.73834	2.37416	1.24742	0.494863	1
ENSMUSG00000031293	4.38576	2.59993	6.17158	2.37375	1.24717	0.263131	1	Rs1
ENSMUSG00000028715	0.644157	0.381968	0.906347	2.37284	1.24661	0.869362	1	Cyp4a14
ENSMUSG00000059565	1.28831	0.763936	1.81269	2.37284	1.24661	0.637679	1
ENSMUSG00000065606	0.644157	0.381968	0.906347	2.37284	1.24661	0.869362	1
ENSMUSG00000078441	0.644157	0.381968	0.906347	2.37284	1.24661	0.869362	1	Scamp4
ENSMUSG00000081024	0.644157	0.381968	0.906347	2.37284	1.24661	0.869362	1
ENSMUSG00000090067	0.644157	0.381968	0.906347	2.37284	1.24661	0.869362	1
ENSMUSG00000092222	0.644157	0.381968	0.906347	2.37284	1.24661	0.869362	1
ENSMUSG00000094245	0.644157	0.381968	0.906347	2.37284	1.24661	0.869362	1
ENSMUSG00000097482	0.644157	0.381968	0.906347	2.37284	1.24661	0.869362	1
ENSMUSG00000093424	6.2336	3.69767	8.76954	2.37164	1.24589	0.164978	1
ENSMUSG00000074491	4.37873	2.59993	6.15754	2.36835	1.24388	0.26347	1	Clec4g
ENSMUSG00000069309	1.86125	1.10523	2.61726	2.36806	1.24371	0.504317	1	Hist1h2an
ENSMUSG00000034115	2.6232	1.55784	3.68856	2.36773	1.24351	0.39462	1	Scn11a
ENSMUSG00000010492	45.272	26.9496	63.5943	2.35975	1.23864	0.0308125	1	Uckl1os
ENSMUSG00000045087	12.4453	7.41032	17.4803	2.35892	1.23812	0.266638	1	S1pr5
ENSMUSG00000087503	1.30809	0.778922	1.83726	2.35872	1.238	0.634908	1
ENSMUSG00000023439	193.105	115.044	271.165	2.35704	1.23698	0.00857202	1	Gnb3
ENSMUSG00000022311	1.92282	1.1459	2.69974	2.35599	1.23633	0.497378	1	Csmd3
ENSMUSG00000071202	1.92282	1.1459	2.69974	2.35599	1.23633	0.497378	1	Ccdc78
ENSMUSG00000065987	2.4142	1.43904	3.38937	2.3553	1.23591	0.471429	1	Cd209b
ENSMUSG00000060962	4.56047	2.7186	6.40234	2.35501	1.23574	0.30223	1	Dmkn
ENSMUSG00000070495	1.93359	1.1534	2.71378	2.35286	1.23441	0.496198	1	Ctcfl
ENSMUSG00000091550	1.30546	0.778922	1.832	2.35197	1.23387	0.635273	1
ENSMUSG00000077756	1.29206	0.771429	1.81269	2.34979	1.23253	0.63715	1
ENSMUSG00000083244	1.29206	0.771429	1.81269	2.34979	1.23253	0.63715	1
ENSMUSG00000089842	1.29206	0.771429	1.81269	2.34979	1.23253	0.63715	1
ENSMUSG00000088573	4.35286	2.59993	6.10579	2.34844	1.23171	0.235414	1
ENSMUSG00000091735	1.95336	1.16838	2.73834	2.3437	1.22879	0.494055	1	Gpr62
ENSMUSG00000097635	3.70562	2.21796	5.19328	2.34147	1.22741	0.316636	1
ENSMUSG00000022900	1.11512	0.667609	1.56263	2.34064	1.2269	0.774016	1	Ildr1
ENSMUSG00000039809	1.76303	1.05707	2.46898	2.33568	1.22384	0.593623	1	Gabbr2
ENSMUSG00000026650	58.8871	35.3194	82.4548	2.33455	1.22314	0.000984121	1	Meig1
ENSMUSG00000040399	0.647904	0.389461	0.906347	2.32718	1.21858	0.868759	1
ENSMUSG00000048349	0.647904	0.389461	0.906347	2.32718	1.21858	0.868759	1	Pou4f1
ENSMUSG00000050854	0.647904	0.389461	0.906347	2.32718	1.21858	0.868759	1	Tmem125
ENSMUSG00000070564	0.647904	0.389461	0.906347	2.32718	1.21858	0.868759	1	Ntn5
ENSMUSG00000077625	0.647904	0.389461	0.906347	2.32718	1.21858	0.868759	1
ENSMUSG00000077659	0.647904	0.389461	0.906347	2.32718	1.21858	0.868759	1
ENSMUSG00000080731	0.647904	0.389461	0.906347	2.32718	1.21858	0.868759	1
ENSMUSG00000085269	0.647904	0.389461	0.906347	2.32718	1.21858	0.868759	1
ENSMUSG00000097371	0.647904	0.389461	0.906347	2.32718	1.21858	0.868759	1
ENSMUSG00000097833	0.647904	0.389461	0.906347	2.32718	1.21858	0.868759	1
ENSMUSG00000061911	1.28241	0.771429	1.79339	2.32476	1.21708	0.638518	1	Myt1l
ENSMUSG00000035211	1.26901	0.763936	1.77409	2.3223	1.21555	0.64044	1	Xrra1
ENSMUSG00000051497	0.634506	0.381968	0.887043	2.3223	1.21555	0.870933	1	Kcnj16
ENSMUSG00000064921	0.634506	0.381968	0.887043	2.3223	1.21555	0.870933	1
ENSMUSG00000049382	7.72494	4.65092	10.799	2.3219	1.2153	0.290221	1	Krt8
ENSMUSG00000083344	2.46856	1.4872	3.44992	2.31974	1.21396	0.411816	1
ENSMUSG00000078722	3.56326	2.14732	4.9792	2.3188	1.21338	0.325406	1
ENSMUSG00000084835	3.01975	1.82101	4.2185	2.31658	1.212	0.386259	1
ENSMUSG00000084403	59.724	36.0304	83.4175	2.3152	1.21113	0.59954	1
ENSMUSG00000027376	1.93406	1.16838	2.69974	2.31066	1.20831	0.496146	1	Prom2
ENSMUSG00000084760	0.631875	0.381968	0.881782	2.30853	1.20697	0.871366	1
ENSMUSG00000095407	1.82834	1.10523	2.55146	2.30852	1.20697	0.586419	1	Tmem200c
ENSMUSG00000021700	3.72221	2.25114	5.19328	2.30696	1.20599	0.315651	1	Rab3c
ENSMUSG00000033227	1.10284	0.667609	1.53807	2.30385	1.20405	0.775661	1	Wnt6
ENSMUSG00000090558	1.902	1.1534	2.65061	2.29809	1.20043	0.499688	1
ENSMUSG00000081480	14.4928	8.8012	20.1844	2.29337	1.19747	0.0476836	1
ENSMUSG00000042477	1.27013	0.771429	1.76883	2.29292	1.19719	0.640279	1	Tfap2e
ENSMUSG00000079444	2.9055	1.76535	4.04566	2.2917	1.19642	0.447634	1	Prickle4
ENSMUSG00000054745	2.46903	1.50219	3.43587	2.28725	1.19361	0.408025	1
ENSMUSG00000044125	3.17588	1.93232	4.41943	2.28711	1.19353	0.329596	1	9530080O11Rik
ENSMUSG00000093157	9.56205	5.8193	13.3048	2.28632	1.19303	0.110431	1	Mir3098
ENSMUSG00000093985	6.04756	3.68268	8.41244	2.28433	1.19177	0.189681	1	Gm10406
ENSMUSG00000028778	0.638252	0.389461	0.887043	2.27762	1.18753	0.87032	1	Hcrtr1
ENSMUSG00000079019	0.638252	0.389461	0.887043	2.27762	1.18753	0.87032	1	Insl3
ENSMUSG00000081244	0.638252	0.389461	0.887043	2.27762	1.18753	0.87032	1
ENSMUSG00000082289	0.638252	0.389461	0.887043	2.27762	1.18753	0.87032	1
ENSMUSG00000089909	0.638252	0.389461	0.887043	2.27762	1.18753	0.87032	1
ENSMUSG00000083816	5.78337	3.5307	8.03604	2.27605	1.18653	0.22034	1
ENSMUSG00000020676	23.1845	14.1712	32.1977	2.27205	1.18399	0.336581	1	Ccl11
ENSMUSG00000078954	24.2548	14.8283	33.6814	2.27143	1.1836	0.0662461	1	Arhgap8
ENSMUSG00000060402	2.35366	1.43904	3.26829	2.27116	1.18343	0.477035	1	Chst8
ENSMUSG00000095712	1.72881	1.05707	2.40055	2.27095	1.18329	0.597546	1
ENSMUSG00000025129	1.81981	1.11273	2.52689	2.2709	1.18326	0.58734	1	Ppp1r27
ENSMUSG00000084086	1.27387	0.778922	1.76883	2.27086	1.18324	0.639739	1
ENSMUSG00000019772	1.80641	1.10523	2.50759	2.26883	1.18195	0.588798	1	Vip
ENSMUSG00000093805	2.89697	1.77284	4.02109	2.26816	1.18152	0.448298	1	Gm9994
ENSMUSG00000044288	1.79301	1.09774	2.48828	2.26673	1.18061	0.590271	1	Cnr1
ENSMUSG00000025194	0.635622	0.389461	0.881782	2.26411	1.17894	0.87075	1	Abcc2
ENSMUSG00000079076	0.635622	0.389461	0.881782	2.26411	1.17894	0.87075	1	Gm3086
ENSMUSG00000086937	0.635622	0.389461	0.881782	2.26411	1.17894	0.87075	1
ENSMUSG00000035699	12.1262	7.4328	16.8196	2.26289	1.17817	0.0656939	1	Slc51a
ENSMUSG00000085143	1.8693	1.1459	2.5927	2.26258	1.17797	0.503391	1	LOC102640811
ENSMUSG00000082736	4.31771	2.64809	5.98733	2.261	1.17696	0.266459	1
ENSMUSG00000054598	0.622223	0.381968	0.862479	2.25799	1.17504	0.872975	1	9130230L23Rik
ENSMUSG00000080006	0.622223	0.381968	0.862479	2.25799	1.17504	0.872975	1
ENSMUSG00000087166	0.622223	0.381968	0.862479	2.25799	1.17504	0.872975	1	L1td1
ENSMUSG00000095955	0.622223	0.381968	0.862479	2.25799	1.17504	0.872975	1
ENSMUSG00000095982	0.622223	0.381968	0.862479	2.25799	1.17504	0.872975	1	Vmn1r3
ENSMUSG00000034435	4.80319	2.94872	6.65766	2.25781	1.17493	0.259377	1	Tmem30b
ENSMUSG00000043388	8.64994	5.31117	11.9887	2.25726	1.17458	0.209945	1	Tmem130
ENSMUSG00000085085	2.35478	1.44653	3.26303	2.25576	1.17361	0.476929	1
ENSMUSG00000042064	1.70576	1.04958	2.36194	2.25038	1.17017	0.60025	1	Myo3b
ENSMUSG00000028051	1.26422	0.778922	1.74952	2.24608	1.16741	0.641134	1	Hcn3
ENSMUSG00000044117	1.08354	0.667609	1.49946	2.24602	1.16737	0.778295	1	2900011O08Rik
ENSMUSG00000001985	6.0899	3.75332	8.42649	2.24507	1.16676	0.188334	1	Grik3
ENSMUSG00000065563	2.25544	1.39087	3.12001	2.2432	1.16556	0.554597	1
ENSMUSG00000085735	1.25082	0.771429	1.73022	2.24288	1.16535	0.643093	1
ENSMUSG00000078648	28.8214	17.7801	39.8627	2.24199	1.16478	0.186093	1
ENSMUSG00000094480	1.08091	0.667609	1.4942	2.23814	1.1623	0.778658	1
ENSMUSG00000097831	1.08091	0.667609	1.4942	2.23814	1.1623	0.778658	1	4930540M05Rik
ENSMUSG00000083496	1.15851	0.715772	1.60124	2.23708	1.16162	0.768383	1
ENSMUSG00000095406	1.78711	1.10523	2.46898	2.2339	1.15956	0.590925	1
ENSMUSG00000055972	2.33811	1.44653	3.22968	2.23271	1.15879	0.47851	1
ENSMUSG00000089643	5.37078	3.32319	7.41836	2.2323	1.15853	0.223074	1
ENSMUSG00000054161	6.66714	4.1278	9.20649	2.23036	1.15728	0.16393	1	Fam83e
ENSMUSG00000081078	5.43235	3.36386	7.50083	2.22983	1.15693	0.220728	1
ENSMUSG00000088913	2.41308	1.49469	3.33146	2.22886	1.1563	0.471531	1
ENSMUSG00000082193	1.69348	1.04958	2.33738	2.22697	1.15508	0.601711	1
ENSMUSG00000013523	5.25673	3.26004	7.25341	2.22494	1.15377	0.227559	1	Bcas1
ENSMUSG00000027273	0.62597	0.389461	0.862479	2.21455	1.14701	0.872347	1	Sp25
ENSMUSG00000039179	0.62597	0.389461	0.862479	2.21455	1.14701	0.872347	1	Tekt5
ENSMUSG00000042102	0.62597	0.389461	0.862479	2.21455	1.14701	0.872347	1	Dmgdh
ENSMUSG00000077339	0.62597	0.389461	0.862479	2.21455	1.14701	0.872347	1
ENSMUSG00000081672	0.62597	0.389461	0.862479	2.21455	1.14701	0.872347	1
ENSMUSG00000084151	0.62597	0.389461	0.862479	2.21455	1.14701	0.872347	1
ENSMUSG00000086817	0.62597	0.389461	0.862479	2.21455	1.14701	0.872347	1	LOC102632940
ENSMUSG00000088453	0.62597	0.389461	0.862479	2.21455	1.14701	0.872347	1
ENSMUSG00000089184	0.62597	0.389461	0.862479	2.21455	1.14701	0.872347	1
ENSMUSG00000089652	0.62597	0.389461	0.862479	2.21455	1.14701	0.872347	1
ENSMUSG00000092797	0.62597	0.389461	0.862479	2.21455	1.14701	0.872347	1
ENSMUSG00000094497	0.62597	0.389461	0.862479	2.21455	1.14701	0.872347	1
ENSMUSG00000094571	0.62597	0.389461	0.862479	2.21455	1.14701	0.872347	1
ENSMUSG00000076621	1.77482	1.10523	2.44442	2.21167	1.14514	0.592295	1
ENSMUSG00000087807	1.77482	1.10523	2.44442	2.21167	1.14514	0.592295	1
ENSMUSG00000087674	1.69722	1.05707	2.33738	2.21119	1.14482	0.601264	1
ENSMUSG00000082718	1.14885	0.715772	1.58194	2.21011	1.14412	0.769613	1
ENSMUSG00000092188	1.07125	0.667609	1.4749	2.20923	1.14354	0.780002	1
ENSMUSG00000055368	3.01074	1.87666	4.14481	2.20861	1.14314	0.386935	1	Slc6a2
ENSMUSG00000043286	0.612572	0.381968	0.843176	2.20745	1.14238	0.874614	1	Pnpla1
ENSMUSG00000047495	0.612572	0.381968	0.843176	2.20745	1.14238	0.874614	1	Dlgap2
ENSMUSG00000080516	0.612572	0.381968	0.843176	2.20745	1.14238	0.874614	1
ENSMUSG00000084624	0.612572	0.381968	0.843176	2.20745	1.14238	0.874614	1
ENSMUSG00000090105	0.612572	0.381968	0.843176	2.20745	1.14238	0.874614	1
ENSMUSG00000064719	5.68514	3.54568	7.82459	2.20679	1.14195	0.248489	1
ENSMUSG00000086935	3.01711	1.88416	4.15007	2.20262	1.13922	0.386457	1
ENSMUSG00000081473	1.06862	0.667609	1.46964	2.20134	1.13839	0.825598	1
ENSMUSG00000020607	24.7062	15.4626	33.9499	2.19562	1.13463	0.0174026	1	Fam84a
ENSMUSG00000025658	8.17992	5.12921	11.2306	2.18954	1.13063	0.169818	1	Cnksr2
ENSMUSG00000076315	1.22889	0.771429	1.68635	2.18601	1.1283	0.646362	1
ENSMUSG00000097098	9.31893	5.85248	12.7854	2.18461	1.12737	0.132264	1	9330111N05Rik
ENSMUSG00000097459	8.3681	5.25551	11.4807	2.1845	1.12731	0.150466	1
ENSMUSG00000085984	2.20081	1.38338	3.01823	2.18178	1.1255	0.559821	1	1700001G11Rik
ENSMUSG00000055114	13.1191	8.2481	17.9901	2.18112	1.12507	0.064932	1
ENSMUSG00000029330	122.42	76.9837	167.856	2.18041	1.1246	0.0838711	1	Cds1
ENSMUSG00000007122	400.447	251.859	549.034	2.17993	1.12428	0.0233752	1	Casq1
ENSMUSG00000086680	4.01396	2.52928	5.49863	2.17399	1.12034	0.316305	1
ENSMUSG00000086249	1.05897	0.667609	1.45033	2.17243	1.11931	0.781734	1
ENSMUSG00000058260	5.23451	3.30071	7.1683	2.17174	1.11885	0.254446	1	Serpi9
ENSMUSG00000089308	3.56999	2.25114	4.88883	2.17172	1.11884	0.366633	1
ENSMUSG00000040533	0.616318	0.389461	0.843176	2.16498	1.11435	0.873974	1	Matn1
ENSMUSG00000081167	0.616318	0.389461	0.843176	2.16498	1.11435	0.873974	1
ENSMUSG00000082080	0.616318	0.389461	0.843176	2.16498	1.11435	0.873974	1
ENSMUSG00000097197	0.616318	0.389461	0.843176	2.16498	1.11435	0.873974	1	9530027J09Rik
ENSMUSG00000021751	18.811	11.8976	25.7243	2.16214	1.11246	0.0331693	1	Acox2
ENSMUSG00000077925	1.14295	0.723265	1.56263	2.16053	1.11138	0.770371	1	Mir453
ENSMUSG00000035498	11.703	7.41032	15.9958	2.15858	1.11008	0.0759803	1	Cdcp1
ENSMUSG00000081742	0.60292	0.381968	0.823872	2.15691	1.10897	0.876284	1
ENSMUSG00000092390	0.60292	0.381968	0.823872	2.15691	1.10897	0.876284	1
ENSMUSG00000094462	0.60292	0.381968	0.823872	2.15691	1.10897	0.876284	1
ENSMUSG00000085548	3.48911	2.21047	4.76775	2.1569	1.10896	0.371865	1
ENSMUSG00000097180	32.0953	20.3358	43.8548	2.15653	1.10871	0.016444	1	2700038G22Rik
ENSMUSG00000081850	5.91024	3.74583	8.07465	2.15564	1.10811	0.215842	1
ENSMUSG00000033006	10.7861	6.83904	14.7332	2.15428	1.1072	0.250756	1	Sox10
ENSMUSG00000058073	1.72984	1.09774	2.36194	2.15164	1.10544	0.597426	1
ENSMUSG00000087348	1.12692	0.715772	1.53807	2.14883	1.10355	0.772456	1
ENSMUSG00000082248	6.33359	4.02398	8.6432	2.14792	1.10294	0.212633	1
ENSMUSG00000020867	11.1141	7.06153	15.1666	2.14778	1.10285	0.101096	1	Spata20
ENSMUSG00000017832	1.04932	0.667609	1.43103	2.14352	1.09998	0.783113	1	Hspb9
ENSMUSG00000085331	1.04932	0.667609	1.43103	2.14352	1.09998	0.783113	1
ENSMUSG00000083936	7.3904	4.70657	10.0742	2.14046	1.09792	0.181139	1
ENSMUSG00000076121	3.4056	2.1698	4.64141	2.1391	1.097	0.377479	1
ENSMUSG00000097106	1.79779	1.1459	2.44968	2.13777	1.09611	0.589744	1
ENSMUSG00000057262	2.32048	1.47971	3.16125	2.1364	1.09518	0.480199	1
ENSMUSG00000065643	5.18605	3.30821	7.06389	2.13526	1.09441	0.285777	1
ENSMUSG00000058357	3.45115	2.20297	4.69932	2.13317	1.093	0.37439	1
ENSMUSG00000056468	2.16659	1.38338	2.9498	2.13231	1.09242	0.563188	1
ENSMUSG00000053166	3.99492	2.55176	5.43808	2.13111	1.0916	0.355823	1	Cdh22
ENSMUSG00000085261	2.0903	1.33522	2.84538	2.13103	1.09155	0.649691	1
ENSMUSG00000052212	2.83483	1.81351	3.85614	2.12634	1.08837	0.453226	1	Cd177
ENSMUSG00000049493	3.54018	2.26612	4.81425	2.12444	1.08708	0.554311	1	Pls1
ENSMUSG00000053846	1.11727	0.715772	1.51877	2.12186	1.08533	0.77373	1	Lipg
ENSMUSG00000036699	4.58931	2.94123	6.23739	2.12068	1.08453	0.300794	1	Zcchc12
ENSMUSG00000087344	2.32928	1.49469	3.16388	2.11674	1.08184	0.547815	1
ENSMUSG00000046110	2.76229	1.77284	3.75173	2.11622	1.08149	0.519771	1	Serinc4
ENSMUSG00000044349	10.1694	6.52771	13.811	2.11575	1.08117	0.360904	1	Snhg11
ENSMUSG00000066153	0.606667	0.389461	0.823872	2.11542	1.08094	0.875632	1	Mup21
ENSMUSG00000070990	0.606667	0.389461	0.823872	2.11542	1.08094	0.875632	1	Foxe1
ENSMUSG00000086554	0.606667	0.389461	0.823872	2.11542	1.08094	0.875632	1
ENSMUSG00000093562	0.606667	0.389461	0.823872	2.11542	1.08094	0.875632	1
ENSMUSG00000081679	1.03967	0.667609	1.41173	2.1146	1.08039	0.784507	1
ENSMUSG00000053168	1.81868	1.16838	2.46898	2.11316	1.0794	0.587462	1	9030619P08Rik
ENSMUSG00000097060	4.11723	2.64809	5.58636	2.10958	1.07696	0.310521	1
ENSMUSG00000065612	2.8487	1.83599	3.8614	2.10317	1.07257	0.452112	1
ENSMUSG00000088942	2.3304	1.50219	3.15861	2.10268	1.07223	0.547715	1
ENSMUSG00000050957	5.36776	3.46019	7.27534	2.10258	1.07216	0.249034	1	Insl6
ENSMUSG00000041052	1.12102	0.723265	1.51877	2.09987	1.0703	0.773234	1	Slc7a13
ENSMUSG00000078875	1.12102	0.723265	1.51877	2.09987	1.0703	0.773234	1	Gm14295
ENSMUSG00000081490	1.12102	0.723265	1.51877	2.09987	1.0703	0.773234	1
ENSMUSG00000027895	4.18892	2.70375	5.6741	2.09861	1.06943	0.30665	1	Kcnc4
ENSMUSG00000084904	9.65819	6.23445	13.0819	2.09833	1.06924	0.132612	1	Gm14827
ENSMUSG00000025726	2.89424	1.86917	3.91932	2.09682	1.0682	0.448511	1	Slc28a1
ENSMUSG00000036510	1.11839	0.723265	1.51351	2.0926	1.0653	0.773582	1	Cdh8
ENSMUSG00000016498	1.69562	1.09774	2.29351	2.0893	1.06302	0.601454	1	Pdcd1lg2
ENSMUSG00000056973	754.23	488.308	1020.15	2.08916	1.06292	0.0539212	1	Ces1d
ENSMUSG00000046378	1.793	1.16089	2.42511	2.08901	1.06282	0.590272	1	Asphd1
ENSMUSG00000050917	1.10499	0.715772	1.4942	2.08754	1.0618	0.775372	1	Fgf4
ENSMUSG00000040919	2.23238	1.44653	3.01823	2.08653	1.06111	0.55678	1	4930505A04Rik
ENSMUSG00000083207	2.94616	1.90984	3.98249	2.08525	1.06022	0.44451	1
ENSMUSG00000094634	8.02002	5.19986	10.8402	2.08471	1.05985	0.157733	1	Gm3642
ENSMUSG00000083544	4.57451	2.96691	6.1821	2.08369	1.05914	0.337079	1
ENSMUSG00000043488	9.08058	5.88994	12.2712	2.08342	1.05895	0.164165	1
ENSMUSG00000085967	8.06688	5.23303	10.9007	2.08306	1.05871	0.172446	1	Gm12530
ENSMUSG00000093975	7.81824	5.07356	10.5629	2.08196	1.05794	0.196192	1
ENSMUSG00000044694	4.59297	2.9819	6.20404	2.08057	1.05698	0.300613	1
ENSMUSG00000063820	1.702	1.10523	2.29877	2.0799	1.05651	0.600695	1	Arl9
ENSMUSG00000088647	1.702	1.10523	2.29877	2.0799	1.05651	0.600695	1
ENSMUSG00000097397	3.90495	2.53678	5.27313	2.07867	1.05566	0.36114	1	Gm16861
ENSMUSG00000022598	2.82413	1.83599	3.81228	2.07641	1.05409	0.45409	1	Psca
ENSMUSG00000055489	61.5575	40.0292	83.0857	2.07563	1.05355	0.0673456	1	Ano5
ENSMUSG00000053263	9.41565	6.12313	12.7082	2.07543	1.05341	0.163606	1
ENSMUSG00000001558	10.2932	6.69455	13.8918	2.07509	1.05317	0.11698	1	Klhl10
ENSMUSG00000040367	3.46932	2.25863	4.68002	2.07206	1.05107	0.373175	1	Lrrd1
ENSMUSG00000024366	22.4735	14.6313	30.3157	2.07197	1.051	0.071635	1	Gfra3
ENSMUSG00000079681	2.95497	1.92483	3.98512	2.07038	1.0499	0.391192	1	Zglp1
ENSMUSG00000042943	2.28167	1.4872	3.07614	2.06841	1.04852	0.552152	1	Erich3
ENSMUSG00000086842	2.28167	1.4872	3.07614	2.06841	1.04852	0.552152	1
ENSMUSG00000092384	1.70575	1.11273	2.29877	2.06589	1.04676	0.600251	1
ENSMUSG00000036169	2.77999	1.81351	3.74647	2.06586	1.04675	0.51836	1	Sostdc1
ENSMUSG00000022595	7.45917	4.86605	10.0523	2.0658	1.0467	0.197783	1	Lypd2
ENSMUSG00000097762	8.28616	5.40749	11.1648	2.0647	1.04593	0.151836	1
ENSMUSG00000001520	37.1754	24.2639	50.0868	2.06425	1.04562	0.11363	1	Nrip2
ENSMUSG00000033024	41.8419	27.3377	56.3461	2.06112	1.04343	0.0162115	1	Klra9
ENSMUSG00000064140	1.09534	0.715772	1.4749	2.06057	1.04304	0.776678	1	Trim38
ENSMUSG00000082784	1.09534	0.715772	1.4749	2.06057	1.04304	0.776678	1
ENSMUSG00000091661	1.09534	0.715772	1.4749	2.06057	1.04304	0.776678	1
ENSMUSG00000037492	5.73675	3.75332	7.72017	2.05689	1.04046	0.273927	1	Zmat4
ENSMUSG00000050550	179.361	117.403	241.318	2.05547	1.03947	0.00309666	1
ENSMUSG00000050822	2.87278	1.88416	3.8614	2.04941	1.03521	0.450197	1	Slc29a4
ENSMUSG00000020061	2.93172	1.92483	3.93862	2.04622	1.03296	0.445612	1	Mybpc1
ENSMUSG00000025359	2.11813	1.39087	2.84538	2.04575	1.03263	0.647097	1	Pmel
ENSMUSG00000016255	13.3172	8.74874	17.8857	2.04437	1.03166	0.0918449	1	Tubb1
ENSMUSG00000083195	3.49931	2.2993	4.69932	2.0438	1.03126	0.371194	1
ENSMUSG00000064867	3.7848	2.48861	5.08098	2.04169	1.02976	0.412217	1
ENSMUSG00000021799	27.1014	17.8209	36.3819	2.04154	1.02966	0.108134	1	Opn4
ENSMUSG00000023236	1.09908	0.723265	1.4749	2.03922	1.02802	0.776169	1	Scg5
ENSMUSG00000082932	1.09908	0.723265	1.4749	2.03922	1.02802	0.776169	1	Cyp2j8
ENSMUSG00000083922	1.09908	0.723265	1.4749	2.03922	1.02802	0.776169	1
ENSMUSG00000090369	3.78855	2.49611	5.08098	2.03556	1.02543	0.411982	1	4933411K16Rik
ENSMUSG00000043088	13.0656	8.61937	17.5119	2.03169	1.02268	0.088312	1	Il17re
ENSMUSG00000094613	3.3384	2.20297	4.47382	2.03081	1.02206	0.42986	1	A630076J17Rik
ENSMUSG00000070077	1.60115	1.05707	2.14523	2.02941	1.02106	0.704533	1
ENSMUSG00000092286	6.17059	4.07964	8.26154	2.02507	1.01797	0.24126	1
ENSMUSG00000047168	2.34483	1.55035	3.13931	2.0249	1.01785	0.546427	1
ENSMUSG00000024471	1573.74	1040.64	2106.83	2.02455	1.0176	0.0783942	1	Myot
ENSMUSG00000015401	0.504698	0.333804	0.675591	2.02391	1.01715	1	1	Tmem27
ENSMUSG00000020887	0.504698	0.333804	0.675591	2.02391	1.01715	1	1	A230052G05Rik
ENSMUSG00000024027	0.504698	0.333804	0.675591	2.02391	1.01715	1	1	Glp1r
ENSMUSG00000034607	0.504698	0.333804	0.675591	2.02391	1.01715	1	1	Pof1b
ENSMUSG00000038491	0.504698	0.333804	0.675591	2.02391	1.01715	1	1
ENSMUSG00000065420	0.504698	0.333804	0.675591	2.02391	1.01715	1	1	Mir142b
ENSMUSG00000073094	0.504698	0.333804	0.675591	2.02391	1.01715	1	1	Smim9
ENSMUSG00000080408	0.504698	0.333804	0.675591	2.02391	1.01715	1	1
ENSMUSG00000085812	0.504698	0.333804	0.675591	2.02391	1.01715	1	1
ENSMUSG00000086273	0.504698	0.333804	0.675591	2.02391	1.01715	1	1	Rbm46os
ENSMUSG00000088069	0.504698	0.333804	0.675591	2.02391	1.01715	1	1
ENSMUSG00000088141	0.504698	0.333804	0.675591	2.02391	1.01715	1	1
ENSMUSG00000092509	0.504698	0.333804	0.675591	2.02391	1.01715	1	1
ENSMUSG00000094326	1.0094	0.667609	1.35118	2.02391	1.01715	0.936173	1
ENSMUSG00000095845	0.504698	0.333804	0.675591	2.02391	1.01715	1	1	Gm5741
ENSMUSG00000021301	7.19975	4.76223	9.63727	2.02369	1.01699	0.463433	1	Hecw1
ENSMUSG00000089656	3.35797	2.22545	4.49049	2.01779	1.01277	0.544263	1
ENSMUSG00000041062	2.25383	1.49469	3.01297	2.01578	1.01134	0.554748	1	Mslnl
ENSMUSG00000064936	3.84533	2.55176	5.13889	2.01386	1.00996	0.408456	1
ENSMUSG00000046854	1.151	0.763936	1.53807	2.01335	1.0096	0.769338	1	Pip5kl1
ENSMUSG00000049598	1.08943	0.723265	1.45559	2.01253	1.00901	0.777484	1	Vsig8
ENSMUSG00000088514	2.66753	1.77284	3.56222	2.00933	1.00671	0.527555	1
ENSMUSG00000084240	2.17623	1.44653	2.90593	2.0089	1.0064	0.562232	1
ENSMUSG00000045842	1.07603	0.715772	1.43629	2.00663	1.00478	0.779335	1
ENSMUSG00000052848	1.07603	0.715772	1.43629	2.00663	1.00478	0.779335	1
ENSMUSG00000062296	1.07603	0.715772	1.43629	2.00663	1.00478	0.779335	1	Trank1
ENSMUSG00000081873	8.06797	5.36682	10.7691	2.00661	1.00476	0.172421	1
ENSMUSG00000035349	1.0868	0.723265	1.45033	2.00526	1.00379	0.777845	1	Mia2
ENSMUSG00000081951	2.34024	1.55784	3.12264	2.00446	1.00322	0.549874	1
ENSMUSG00000046070	122.139	81.4042	162.874	2.00081	1.00058	0.0615686	1	Igfals
ENSMUSG00000031257	5.10787	3.40453	6.8112	2.00063	1.00045	0.289201	1	Nox1
ENSMUSG00000029419	2.08654	1.39087	2.78221	2.00033	1.00024	0.650045	1	Gm996
ENSMUSG00000083111	1.16815	0.778922	1.55737	1.9994	0.999564	0.767169	1
ENSMUSG00000049100	1.64605	1.09774	2.19436	1.99898	0.999262	0.699674	1	Pcdh10
ENSMUSG00000085445	3.08629	2.05848	4.11409	1.9986	0.998992	0.596339	1
ENSMUSG00000034706	5.70974	3.80898	7.61051	1.99804	0.998588	0.247545	1	Dic2
ENSMUSG00000051650	1.73948	1.16089	2.31807	1.99681	0.997696	0.596311	1	B3gnt2
ENSMUSG00000005148	4.4563	2.9744	5.9382	1.99644	0.997426	0.343162	1	Klf5
ENSMUSG00000089405	2.24793	1.50219	2.99366	1.99287	0.994848	0.555305	1
ENSMUSG00000081236	13.2593	8.87504	17.6435	1.98799	0.99131	0.105747	1
ENSMUSG00000093697	3.46536	2.32178	4.60895	1.98509	0.989207	0.42126	1
ENSMUSG00000088929	7.35974	4.93656	9.78293	1.98173	0.986761	0.274902	1
ENSMUSG00000073739	1.07715	0.723265	1.43103	1.97857	0.984457	0.77918	1	Gm16287
ENSMUSG00000076147	1.07715	0.723265	1.43103	1.97857	0.984457	0.77918	1
ENSMUSG00000088583	1.07715	0.723265	1.43103	1.97857	0.984457	0.77918	1
ENSMUSG00000092595	1.07715	0.723265	1.43103	1.97857	0.984457	0.77918	1
ENSMUSG00000097402	1.07715	0.723265	1.43103	1.97857	0.984457	0.77918	1
ENSMUSG00000086363	17.6678	11.8644	23.4711	1.97828	0.984245	0.0668408	1	A330102I10Rik
ENSMUSG00000066487	1.63377	1.09774	2.16979	1.9766	0.983021	0.700985	1
ENSMUSG00000061718	4.61421	3.1007	6.12771	1.97623	0.982754	0.335095	1	Ppp1r1b
ENSMUSG00000011034	9.38973	6.31258	12.4669	1.97493	0.981799	0.179397	1	Slc5a1
ENSMUSG00000084756	8.26864	5.55934	10.9779	1.97468	0.981621	0.210702	1
ENSMUSG00000020660	1.1585	0.778922	1.53807	1.97461	0.98157	0.768385	1	Pomc
ENSMUSG00000021228	10.0169	6.73522	13.2986	1.97449	0.981482	0.172278	1	Acot3
ENSMUSG00000087507	4.26708	2.87058	5.66358	1.97297	0.98037	0.393692	1
ENSMUSG00000026380	32.4045	21.8008	43.0081	1.97277	0.980224	0.0228257	1	Tfcp2l1
ENSMUSG00000070342	51.314	34.5588	68.0691	1.96966	0.977945	0.0271875	1
ENSMUSG00000044034	2.71466	1.8285	3.60082	1.96928	0.977667	0.523634	1	Npb
ENSMUSG00000078925	1.1451	0.771429	1.51877	1.96877	0.977295	0.770095	1
ENSMUSG00000081691	1.1451	0.771429	1.51877	1.96877	0.977295	0.770095	1
ENSMUSG00000097111	2.55966	1.72468	3.39463	1.96827	0.976927	0.606017	1
ENSMUSG00000021758	5.98287	4.03147	7.93426	1.96808	0.976789	0.274083	1	Ddx4
ENSMUSG00000084674	1.64014	1.10523	2.17505	1.96796	0.9767	0.700303	1
ENSMUSG00000069441	2.79601	1.88416	3.70786	1.96792	0.97667	0.517095	1	Dsg1a
ENSMUSG00000086993	3.19631	2.15481	4.23781	1.96667	0.975757	0.494493	1
ENSMUSG00000070717	3.28974	2.21796	4.36152	1.96646	0.975599	0.433292	1
ENSMUSG00000025013	13.5864	9.16082	18.012	1.9662	0.975411	0.0868889	1	Tll2
ENSMUSG00000036853	1.48251	1.00141	1.9636	1.96083	0.971464	0.855434	1	Mcoln3
ENSMUSG00000084964	2.61289	1.76535	3.46044	1.9602	0.971001	0.532228	1
ENSMUSG00000041468	0.987461	0.667609	1.30731	1.9582	0.96953	0.926467	1	Gpr12
ENSMUSG00000039543	2.78636	1.88416	3.68856	1.95767	0.969139	0.517856	1	Ttc18
ENSMUSG00000097217	19.5881	13.252	25.9243	1.95626	0.9681	0.086423	1
ENSMUSG00000084381	7.5303	5.09604	9.96455	1.95535	0.96743	0.245568	1
ENSMUSG00000097619	3.18403	2.15481	4.21324	1.95527	0.96737	0.495383	1
ENSMUSG00000093197	2.1858	1.47971	2.89189	1.95436	0.966698	0.561289	1
ENSMUSG00000070498	2.21765	1.50219	2.93312	1.95257	0.965371	0.697028	1	Tmem132b
ENSMUSG00000097844	13.2878	9.00134	17.5742	1.95239	0.965244	0.114154	1
ENSMUSG00000084301	1.54914	1.04958	2.04871	1.95194	0.964909	0.710391	1
ENSMUSG00000086522	4.83166	3.27503	6.3883	1.95061	0.963923	0.372461	1
ENSMUSG00000074235	4.48899	3.04505	5.93294	1.94839	0.962284	0.388442	1	Gm10649
ENSMUSG00000093757	2.69536	1.8285	3.56222	1.94816	0.962115	0.525227	1
ENSMUSG00000068463	3.41073	2.31429	4.50717	1.94754	0.961654	0.4249	1
ENSMUSG00000025582	3.09303	2.09915	4.0869	1.94693	0.961199	0.50214	1	Nptx1
ENSMUSG00000086864	7.19628	4.88424	9.50831	1.94673	0.961055	0.28164	1	A630077J23Rik
ENSMUSG00000024979	4.32059	2.93373	5.70744	1.94546	0.960108	0.390698	1	Tectb
ENSMUSG00000045246	6.706	4.55473	8.85728	1.94463	0.959499	0.256894	1	Kcng4
ENSMUSG00000097323	3.73474	2.53678	4.9327	1.94448	0.959381	0.464885	1
ENSMUSG00000028950	1.6945	1.1534	2.2356	1.93827	0.954773	0.601589	1	Tas1r1
ENSMUSG00000028539	2.04268	1.39087	2.69448	1.93725	0.954013	0.654242	1	Artn
ENSMUSG00000096932	2.52169	1.71719	3.3262	1.93701	0.953829	0.609201	1
ENSMUSG00000085658	10.0024	6.81322	13.1916	1.93618	0.953211	0.210285	1
ENSMUSG00000085976	3.80512	2.59243	5.01781	1.93556	0.952751	0.410944	1
ENSMUSG00000087121	2.19329	1.49469	2.89189	1.93477	0.952161	0.560554	1
ENSMUSG00000076464	2.69384	1.83599	3.55169	1.93448	0.951948	0.636051	1
ENSMUSG00000006642	12.6186	8.60439	16.6327	1.93305	0.950882	0.109343	1	Tcf23
ENSMUSG00000031551	6.04133	4.12031	7.96235	1.93247	0.950442	0.271854	1	Ido1
ENSMUSG00000018554	145.915	99.5221	192.308	1.93231	0.950329	0.066268	1	Ybx2
ENSMUSG00000036492	2.6081	1.78034	3.43587	1.9299	0.948528	0.532644	1	Rnf39
ENSMUSG00000028307	11.1318	7.59977	14.6639	1.92951	0.948238	0.323475	1	Aldob
ENSMUSG00000087626	0.97781	0.667609	1.28801	1.92929	0.948069	0.927402	1
ENSMUSG00000092191	1.61821	1.10523	2.13119	1.92827	0.947305	0.702665	1
ENSMUSG00000097925	1.61821	1.10523	2.13119	1.92827	0.947305	0.702665	1
ENSMUSG00000021613	10.5084	7.18034	13.8365	1.92699	0.946353	0.320428	1	Hapln1
ENSMUSG00000038670	979.046	669.039	1289.05	1.92672	0.946148	0.0152883	1	Mybpc2
ENSMUSG00000070084	2.59339	1.77284	3.41393	1.92568	0.945371	0.603243	1
ENSMUSG00000082922	1.13919	0.778922	1.49946	1.92505	0.944895	0.770857	1
ENSMUSG00000086233	37.6556	25.799	49.5122	1.91915	0.940469	0.0296802	1
ENSMUSG00000083161	11.2209	7.68833	14.7534	1.91893	0.940301	0.58483	1
ENSMUSG00000052222	1.13656	0.778922	1.4942	1.91829	0.939824	0.771198	1
ENSMUSG00000087321	1.13656	0.778922	1.4942	1.91829	0.939824	0.771198	1
ENSMUSG00000083599	3.22414	2.21047	4.23781	1.91716	0.938967	0.492495	1
ENSMUSG00000091906	1.46057	1.00141	1.91973	1.91702	0.938868	0.828522	1
ENSMUSG00000086003	3.14279	2.15481	4.13077	1.917	0.938849	0.498409	1
ENSMUSG00000032503	20.7688	14.2419	27.2957	1.91658	0.938536	0.0578323	1	Arpp21
ENSMUSG00000060068	9.85394	6.75756	12.9503	1.91642	0.938413	0.284961	1
ENSMUSG00000052221	1.54061	1.05707	2.02415	1.91487	0.937243	0.711377	1	Ppp1r36
ENSMUSG00000097557	1.54061	1.05707	2.02415	1.91487	0.937243	0.711377	1	C130060C02Rik
ENSMUSG00000082687	1.59955	1.09774	2.10136	1.91426	0.936787	0.724138	1
ENSMUSG00000094958	13.2147	9.07199	17.3575	1.9133	0.936066	0.106263	1	3110021N24Rik
ENSMUSG00000081404	7.71416	5.29618	10.1321	1.9131	0.935914	0.218561	1
ENSMUSG00000088705	10.9657	7.52899	14.4024	1.91293	0.935781	0.169423	1
ENSMUSG00000028488	21.7619	14.9427	28.5811	1.91272	0.935626	0.183768	1	Sh3gl2
ENSMUSG00000093080	4.93119	3.38634	6.47603	1.9124	0.935382	0.367586	1
ENSMUSG00000088066	1.12316	0.771429	1.4749	1.9119	0.935011	0.772951	1
ENSMUSG00000046550	2.98515	2.05099	3.91932	1.91094	0.934281	0.571966	1	Spin2c
ENSMUSG00000044854	5.03436	3.46019	6.60853	1.90988	0.933478	0.349862	1	1700056E22Rik
ENSMUSG00000002076	8.29384	5.70799	10.8797	1.90605	0.930582	0.347815	1	Hsf2bp
ENSMUSG00000036218	39.366	27.1078	51.6241	1.9044	0.929334	0.0350979	1	Pdzrn4
ENSMUSG00000043219	2.73547	1.88416	3.58678	1.90365	0.928772	0.521934	1	Hoxa6
ENSMUSG00000073608	50.3705	34.7215	66.0195	1.9014	0.927061	0.0273418	1	Gm6086
ENSMUSG00000065608	3.36622	2.32178	4.41065	1.89969	0.925761	0.427933	1	Mirlet7c-2
ENSMUSG00000082342	2.71944	1.87666	3.56222	1.89817	0.924606	0.523242	1
ENSMUSG00000004864	2.57783	1.78034	3.37533	1.89589	0.922879	0.604516	1	Mapk13
ENSMUSG00000081153	2.71681	1.87666	3.55696	1.89536	0.922474	0.523457	1
ENSMUSG00000026840	30.9517	21.3879	40.5154	1.89431	0.921673	0.133491	1	Lamc3
ENSMUSG00000022187	1.12691	0.778922	1.4749	1.89351	0.921065	0.772458	1
ENSMUSG00000020673	0.482764	0.333804	0.631723	1.89249	0.920289	1	1	Tpo
ENSMUSG00000023926	0.482764	0.333804	0.631723	1.89249	0.920289	1	1	Rhag
ENSMUSG00000028172	0.482764	0.333804	0.631723	1.89249	0.920289	1	1	Tacr3
ENSMUSG00000032818	0.482764	0.333804	0.631723	1.89249	0.920289	1	1	Loxhd1
ENSMUSG00000042258	0.482764	0.333804	0.631723	1.89249	0.920289	1	1	Isl1
ENSMUSG00000055561	0.482764	0.333804	0.631723	1.89249	0.920289	1	1	Spink5
ENSMUSG00000061524	0.482764	0.333804	0.631723	1.89249	0.920289	1	1	Zic2
ENSMUSG00000065055	0.482764	0.333804	0.631723	1.89249	0.920289	1	1
ENSMUSG00000066107	0.482764	0.333804	0.631723	1.89249	0.920289	1	1	Gm12666
ENSMUSG00000069671	0.482764	0.333804	0.631723	1.89249	0.920289	1	1
ENSMUSG00000070101	0.482764	0.333804	0.631723	1.89249	0.920289	1	1	Mir341
ENSMUSG00000074199	0.482764	0.333804	0.631723	1.89249	0.920289	1	1	Krtdap
ENSMUSG00000080058	0.482764	0.333804	0.631723	1.89249	0.920289	1	1
ENSMUSG00000080681	0.482764	0.333804	0.631723	1.89249	0.920289	1	1
ENSMUSG00000082688	0.482764	0.333804	0.631723	1.89249	0.920289	1	1
ENSMUSG00000083731	0.482764	0.333804	0.631723	1.89249	0.920289	1	1
ENSMUSG00000084377	0.482764	0.333804	0.631723	1.89249	0.920289	1	1
ENSMUSG00000084526	0.482764	0.333804	0.631723	1.89249	0.920289	1	1
ENSMUSG00000085101	0.482764	0.333804	0.631723	1.89249	0.920289	1	1
ENSMUSG00000085425	0.482764	0.333804	0.631723	1.89249	0.920289	1	1
ENSMUSG00000087360	0.482764	0.333804	0.631723	1.89249	0.920289	1	1
ENSMUSG00000089149	0.482764	0.333804	0.631723	1.89249	0.920289	1	1
ENSMUSG00000092942	0.482764	0.333804	0.631723	1.89249	0.920289	1	1
ENSMUSG00000093174	0.482764	0.333804	0.631723	1.89249	0.920289	1	1
ENSMUSG00000093385	0.482764	0.333804	0.631723	1.89249	0.920289	1	1
ENSMUSG00000097518	0.482764	0.333804	0.631723	1.89249	0.920289	1	1
ENSMUSG00000045813	2.01109	1.39087	2.6313	1.89184	0.919786	0.65734	1
ENSMUSG00000095298	1.51756	1.04958	1.98554	1.89175	0.919723	0.716988	1
ENSMUSG00000090785	2.64315	1.8285	3.4578	1.89106	0.919196	0.599241	1
ENSMUSG00000078306	7.74567	5.3592	10.1321	1.89061	0.91885	0.268696	1
ENSMUSG00000086882	9.49124	6.56825	12.4142	1.89004	0.918414	0.217023	1
ENSMUSG00000090137	7.56019	5.23303	9.88734	1.88941	0.917936	0.244676	1	Uba52
ENSMUSG00000020216	7.56964	5.24053	9.89876	1.88889	0.917536	0.222648	1	Jsrp1
ENSMUSG00000074250	1.59628	1.10523	2.08732	1.88858	0.917299	0.705071	1	Gm10653
ENSMUSG00000077457	1.59628	1.10523	2.08732	1.88858	0.917299	0.705071	1
ENSMUSG00000086746	1.99769	1.38338	2.612	1.88813	0.916957	0.658675	1	LOC102638002
ENSMUSG00000083700	6.43196	4.45411	8.40981	1.8881	0.916936	0.323522	1
ENSMUSG00000017737	20.4081	14.1347	26.6816	1.88766	0.916601	0.305037	1	Mmp9
ENSMUSG00000037143	27.4421	19.0085	35.8757	1.88735	0.916362	0.117497	1	Cfap61
ENSMUSG00000042988	1.11351	0.771429	1.45559	1.88688	0.916004	0.77423	1	Notum
ENSMUSG00000074261	1.11351	0.771429	1.45559	1.88688	0.916004	0.77423	1	Erich4
ENSMUSG00000076356	1.11351	0.771429	1.45559	1.88688	0.916004	0.77423	1
ENSMUSG00000085871	2.07641	1.43904	2.71378	1.88583	0.915199	0.651004	1
ENSMUSG00000055945	5.81397	4.03147	7.59647	1.88429	0.914022	0.309761	1	Prr18
ENSMUSG00000035394	5.42332	3.76082	7.08583	1.88412	0.91389	0.31763	1	Ccdc11
ENSMUSG00000054003	7.7695	5.3893	10.1497	1.8833	0.913267	0.611742	1	Tdrd9
ENSMUSG00000024600	10.4825	7.27332	13.6917	1.88246	0.912617	0.204542	1	Slc27a6
ENSMUSG00000097178	8.9782	6.23445	11.722	1.88019	0.910881	0.244533	1
ENSMUSG00000025936	2.61109	1.81351	3.40867	1.8796	0.910424	0.601807	1	Gm4956
ENSMUSG00000097327	3.75076	2.60742	4.89409	1.87699	0.908419	0.46388	1
ENSMUSG00000085464	1.09748	0.763936	1.43103	1.87323	0.905531	0.776386	1
ENSMUSG00000087492	1.09748	0.763936	1.43103	1.87323	0.905531	0.776386	1
ENSMUSG00000046856	2.05599	1.43154	2.68043	1.87241	0.904894	0.652955	1	Gpr1
ENSMUSG00000047171	15.2542	10.6223	19.8861	1.87211	0.904662	0.30372	1	Helt
ENSMUSG00000089317	4.36922	3.04505	5.6934	1.86973	0.902827	0.388029	1	Snord123
ENSMUSG00000083422	1.11726	0.778922	1.45559	1.86873	0.902058	0.773732	1
ENSMUSG00000089661	1.11726	0.778922	1.45559	1.86873	0.902058	0.773732	1	Mia
ENSMUSG00000028749	1.03722	0.723265	1.35118	1.86817	0.901624	0.926773	1	Pla2g2f
ENSMUSG00000051832	1.58399	1.10523	2.06275	1.86635	0.90022	0.706437	1	E230016K23Rik
ENSMUSG00000091890	4.35319	3.03755	5.66884	1.86625	0.900144	0.388903	1
ENSMUSG00000058975	12.7144	8.87504	16.5538	1.86521	0.899336	0.170482	1	Kcnc1
ENSMUSG00000090273	4.26108	2.9744	5.54776	1.86517	0.899305	0.394032	1	Prr22
ENSMUSG00000074623	80.2519	56.0291	104.475	1.86465	0.898907	0.0135865	1	Gm826
ENSMUSG00000061242	0.955876	0.667609	1.24414	1.86358	0.898076	0.929571	1
ENSMUSG00000076940	0.955876	0.667609	1.24414	1.86358	0.898076	0.929571	1
ENSMUSG00000079457	6.49934	4.53974	8.45895	1.86331	0.897868	0.263958	1
ENSMUSG00000030693	3.22254	2.25114	4.19394	1.86303	0.897652	0.492609	1	Klk10
ENSMUSG00000082597	1.10386	0.771429	1.43629	1.86186	0.896744	0.775523	1
ENSMUSG00000085595	1.10386	0.771429	1.43629	1.86186	0.896744	0.775523	1	LOC102633478
ENSMUSG00000044595	23.2669	16.2673	30.2665	1.86057	0.895748	0.0622378	1	Dnd1
ENSMUSG00000081331	4.64889	3.25255	6.04524	1.85862	0.894228	0.423483	1
ENSMUSG00000028392	1.59037	1.11273	2.06801	1.85851	0.894147	0.705726	1	Bspry
ENSMUSG00000090489	2.99958	2.09915	3.90001	1.8579	0.893671	0.570876	1
ENSMUSG00000097732	14.2541	9.98028	18.5279	1.85645	0.892548	0.142231	1
ENSMUSG00000077990	12.7622	8.93819	16.5862	1.85566	0.891932	0.141059	1
ENSMUSG00000077409	1.10123	0.771429	1.43103	1.85504	0.89145	0.775878	1
ENSMUSG00000031654	1.65569	1.16089	2.15049	1.85245	0.889434	0.698653	1	Cbln1
ENSMUSG00000081123	8.16094	5.72297	10.5989	1.85199	0.889078	0.343178	1
ENSMUSG00000097348	27.1559	19.0599	35.2519	1.84953	0.887161	0.186756	1	Rmst
ENSMUSG00000085682	6.9624	4.88853	9.03627	1.84846	0.886327	0.402293	1
ENSMUSG00000097373	1.49431	1.04958	1.93904	1.84745	0.885532	0.825319	1
ENSMUSG00000045589	2.1154	1.4872	2.74361	1.84481	0.883473	0.647349	1	Frrs1l
ENSMUSG00000052525	2.1154	1.4872	2.74361	1.84481	0.883473	0.647349	1	Spdya
ENSMUSG00000008601	2.19412	1.54286	2.84538	1.84423	0.883018	0.640245	1	Rab25
ENSMUSG00000035875	5.66223	3.98331	7.34115	1.84298	0.882038	0.348446	1	AI182371
ENSMUSG00000006587	37.508	26.389	48.6269	1.8427	0.881818	0.250078	1	Si3
ENSMUSG00000050640	90.1649	63.4383	116.892	1.8426	0.881744	0.0148574	1	Tmem150c
ENSMUSG00000079652	2.03406	1.43154	2.63657	1.84176	0.881087	0.655081	1	Fam71f2
ENSMUSG00000044628	3.87202	2.72623	5.01781	1.84057	0.880153	0.445368	1	Rnf208
ENSMUSG00000058934	2.09937	1.47971	2.71904	1.83755	0.877785	0.64884	1
ENSMUSG00000082495	1.10498	0.778922	1.43103	1.83719	0.877504	0.775373	1
ENSMUSG00000044309	1.97248	1.39087	2.55409	1.83632	0.876818	0.661218	1	Apol7c
ENSMUSG00000040441	454.51	320.542	588.479	1.83589	0.876479	0.0280187	1	Slc26a10
ENSMUSG00000027886	0.473112	0.333804	0.612419	1.83467	0.875517	1	1	1700013F07Rik
ENSMUSG00000056699	0.473112	0.333804	0.612419	1.83467	0.875517	1	1
ENSMUSG00000064672	0.473112	0.333804	0.612419	1.83467	0.875517	1	1
ENSMUSG00000065570	0.473112	0.333804	0.612419	1.83467	0.875517	1	1	Mir412
ENSMUSG00000070280	0.473112	0.333804	0.612419	1.83467	0.875517	1	1	Slc22a14
ENSMUSG00000070695	0.473112	0.333804	0.612419	1.83467	0.875517	1	1	Cntp5a
ENSMUSG00000075420	0.473112	0.333804	0.612419	1.83467	0.875517	1	1	Smim6
ENSMUSG00000075480	0.473112	0.333804	0.612419	1.83467	0.875517	1	1
ENSMUSG00000076272	0.473112	0.333804	0.612419	1.83467	0.875517	1	1	Mir666
ENSMUSG00000077637	0.473112	0.333804	0.612419	1.83467	0.875517	1	1
ENSMUSG00000080912	0.473112	0.333804	0.612419	1.83467	0.875517	1	1
ENSMUSG00000085504	0.473112	0.333804	0.612419	1.83467	0.875517	1	1
ENSMUSG00000086716	0.946224	0.667609	1.22484	1.83467	0.875517	0.930545	1
ENSMUSG00000086862	0.473112	0.333804	0.612419	1.83467	0.875517	1	1	Gm13546
ENSMUSG00000087435	0.473112	0.333804	0.612419	1.83467	0.875517	1	1
ENSMUSG00000088205	0.473112	0.333804	0.612419	1.83467	0.875517	1	1
ENSMUSG00000088249	0.473112	0.333804	0.612419	1.83467	0.875517	1	1
ENSMUSG00000089636	0.473112	0.333804	0.612419	1.83467	0.875517	1	1
ENSMUSG00000090231	0.473112	0.333804	0.612419	1.83467	0.875517	1	1	Cfb
ENSMUSG00000092862	0.473112	0.333804	0.612419	1.83467	0.875517	1	1
ENSMUSG00000093452	0.473112	0.333804	0.612419	1.83467	0.875517	1	1	Zfhx2os
ENSMUSG00000095841	0.473112	0.333804	0.612419	1.83467	0.875517	1	1
ENSMUSG00000040658	9.80039	6.91718	12.6836	1.83364	0.874709	0.192585	1	Dnph1
ENSMUSG00000026567	3.59348	2.53678	4.65019	1.83311	0.874293	0.47405	1	Adcy10
ENSMUSG00000092267	2.0378	1.43904	2.63657	1.83217	0.873556	0.654716	1
ENSMUSG00000078234	196.105	138.497	253.714	1.83191	0.873352	0.0196085	1	Klhdc7a
ENSMUSG00000092994	1.41671	1.00141	1.832	1.82941	0.87138	0.832831	1
ENSMUSG00000041669	2.10312	1.4872	2.71904	1.82829	0.870498	0.64849	1	Prima1
ENSMUSG00000095687	18.8971	13.3666	24.4275	1.8275	0.869872	0.101853	1	Rset2a
ENSMUSG00000090697	4.07935	2.88557	5.27313	1.82742	0.869804	0.44985	1
ENSMUSG00000028125	100.712	71.2515	130.172	1.82694	0.869426	0.136932	1	Abca4
ENSMUSG00000071332	1.01154	0.715772	1.30731	1.82644	0.869033	0.924183	1
ENSMUSG00000050132	4.15544	2.94123	5.36965	1.82565	0.868411	0.445351	1	Sarm1
ENSMUSG00000031775	4.18076	2.95942	5.4021	1.82539	0.868208	0.603325	1	Pllp
ENSMUSG00000085811	11.7342	8.30792	15.1605	1.82482	0.867755	0.224155	1
ENSMUSG00000038602	46.5675	32.9722	60.1628	1.82465	0.867621	0.0350637	1	Slc35f1
ENSMUSG00000060727	2.50126	1.77284	3.22968	1.82175	0.865328	0.610943	1
ENSMUSG00000086794	14.0528	9.96209	18.1436	1.82127	0.864942	0.167817	1
ENSMUSG00000038879	22.0034	15.5994	28.4074	1.82105	0.864771	0.0930622	1	Nipal2
ENSMUSG00000097506	13.6615	9.69879	17.6242	1.81715	0.861681	0.173622	1
ENSMUSG00000087221	68.6645	48.7535	88.5755	1.8168	0.861402	0.0821275	1
ENSMUSG00000003476	368.331	261.559	475.102	1.81642	0.8611	0.00407685	1	Crhr2
ENSMUSG00000086219	9.46282	6.72023	12.2054	1.81622	0.860938	0.217685	1	Srrm4os
ENSMUSG00000032268	4.1203	2.92624	5.31436	1.81611	0.86085	0.498196	1	Tmprss5
ENSMUSG00000097325	3.04344	2.1623	3.92458	1.815	0.859968	0.56761	1	Gm16897
ENSMUSG00000053353	1.63376	1.16089	2.10662	1.81466	0.8597	0.700986	1	2310001K24Rik
ENSMUSG00000076303	1.63376	1.16089	2.10662	1.81466	0.8597	0.700986	1
ENSMUSG00000010066	36.9534	26.2626	47.6442	1.81415	0.859292	0.0385121	1	Cac2d2
ENSMUSG00000040350	662.33	470.769	853.891	1.81382	0.859031	0.0115322	1	Trim7
ENSMUSG00000086603	1.55241	1.10523	1.99958	1.80919	0.855348	0.710016	1
ENSMUSG00000051504	6.97976	4.96974	8.98978	1.8089	0.855116	0.343761	1	Siglech
ENSMUSG00000083009	1.01529	0.723265	1.30731	1.80752	0.854008	0.923834	1
ENSMUSG00000094344	169.377	120.696	218.059	1.80668	0.853339	0.620964	1
ENSMUSG00000033578	97.2825	69.3399	125.225	1.80596	0.852766	0.0111642	1	Tmem35
ENSMUSG00000071192	3.17914	2.26612	4.09216	1.8058	0.852637	0.495738	1	Wfikkn1
ENSMUSG00000030270	1.08193	0.771429	1.39242	1.80499	0.851993	0.778517	1	Cpne9
ENSMUSG00000097585	1.60696	1.1459	2.06801	1.8047	0.851761	0.703894	1
ENSMUSG00000065196	4.03568	2.87808	5.19328	1.80443	0.851542	0.50315	1
ENSMUSG00000097088	9.78495	6.98019	12.5897	1.80363	0.850906	0.253728	1
ENSMUSG00000093205	9.51876	6.79088	12.2466	1.8034	0.850717	0.235672	1
ENSMUSG00000076011	2.16253	1.54286	2.78221	1.80329	0.850627	0.643053	1
ENSMUSG00000095278	3.09648	2.21047	3.98249	1.80165	0.849319	0.56375	1
ENSMUSG00000042256	2.181	1.55784	2.80415	1.80002	0.848013	0.629755	1	Ptchd4
ENSMUSG00000021265	101.683	72.6793	130.687	1.79813	0.846498	0.236968	1	Slc25a29
ENSMUSG00000084299	2.55805	1.8285	3.28759	1.79797	0.846372	0.606151	1
ENSMUSG00000026247	0.933942	0.667609	1.20027	1.79787	0.846289	0.931803	1	Ecel1
ENSMUSG00000085355	1.86788	1.33522	2.40055	1.79787	0.846289	0.761802	1
ENSMUSG00000089883	0.933942	0.667609	1.20027	1.79787	0.846289	0.931803	1
ENSMUSG00000064514	1.47875	1.05707	1.90043	1.79783	0.846255	0.826784	1
ENSMUSG00000073623	2.10096	1.50219	2.69974	1.7972	0.845754	0.648692	1
ENSMUSG00000065097	8.10442	5.79682	10.412	1.79616	0.844917	0.287235	1	Snora16a
ENSMUSG00000088226	9.23404	6.60572	11.8624	1.79577	0.844604	0.242651	1
ENSMUSG00000033967	3.71167	2.65558	4.76775	1.79537	0.84428	0.466346	1	2310014L17Rik
ENSMUSG00000089586	2.54465	1.82101	3.26829	1.79477	0.8438	0.607268	1
ENSMUSG00000085252	4.77625	3.41952	6.13298	1.79352	0.842794	0.416901	1	8430437L04Rik
ENSMUSG00000077607	2.56442	1.83599	3.29285	1.7935	0.842779	0.605622	1
ENSMUSG00000046057	2.08756	1.49469	2.68043	1.7933	0.842616	0.649949	1
ENSMUSG00000029999	34.6679	24.8413	44.4944	1.79114	0.840881	0.10882	1	Tgfa
ENSMUSG00000090138	2.4633	1.76535	3.16125	1.79072	0.840541	0.614232	1
ENSMUSG00000046709	321.67	230.617	412.723	1.78965	0.839676	0.00357572	1	Mapk10
ENSMUSG00000035179	4.1591	2.9819	5.3363	1.78957	0.839611	0.445138	1	Ppp1r32
ENSMUSG00000030494	147.671	105.935	189.406	1.78795	0.838306	0.0145835	1	Rhpn2
ENSMUSG00000078300	3.0708	2.20297	3.93862	1.78786	0.838238	0.565607	1
ENSMUSG00000091366	4.75583	3.41203	6.09963	1.78769	0.838093	0.417937	1
ENSMUSG00000039518	3.00285	2.15481	3.85088	1.78711	0.837629	0.57063	1	Cdsn
ENSMUSG00000079853	1.39477	1.00141	1.78813	1.78561	0.836414	0.835051	1	Klra1
ENSMUSG00000087500	5.67111	4.07214	7.27008	1.78532	0.836183	0.383814	1
ENSMUSG00000043999	9.60023	6.90205	12.2984	1.78185	0.833374	0.258276	1	Gpr75
ENSMUSG00000078289	1.00564	0.723265	1.28801	1.78083	0.832547	0.924737	1
ENSMUSG00000050587	22.351	16.0779	28.6241	1.78034	0.832154	0.0853812	1	Lrrc4c
ENSMUSG00000038917	2.38701	1.71719	3.05684	1.78014	0.831993	0.699439	1	3930402G23Rik
ENSMUSG00000055188	3.45929	2.48861	4.42996	1.78009	0.83195	0.538734	1	Rbm3os
ENSMUSG00000057719	963.644	694.099	1233.19	1.77668	0.829182	0.0122641	1	Sh3rf2
ENSMUSG00000085982	3.54175	2.55176	4.53173	1.77592	0.828568	0.533213	1	9530051G07Rik
ENSMUSG00000056553	10.2115	7.36202	13.0609	1.77409	0.827079	0.540696	1	Ptprn2
ENSMUSG00000040525	5.65555	4.07964	7.23147	1.77258	0.825849	0.384497	1	Cblc
ENSMUSG00000031712	361.404	260.89	461.918	1.77055	0.824198	0.118426	1	Il15
ENSMUSG00000086855	8.89694	6.42376	11.3701	1.77001	0.823758	0.321393	1
ENSMUSG00000078905	17.0131	12.2871	21.7392	1.76927	0.823156	0.145748	1	Gm14393
ENSMUSG00000001095	0.528779	0.381968	0.675591	1.76871	0.822698	1	1	Slc13a2
ENSMUSG00000065503	0.528779	0.381968	0.675591	1.76871	0.822698	1	1	Mir351
ENSMUSG00000077571	0.528779	0.381968	0.675591	1.76871	0.822698	1	1
ENSMUSG00000081979	0.528779	0.381968	0.675591	1.76871	0.822698	1	1
ENSMUSG00000084107	0.528779	0.381968	0.675591	1.76871	0.822698	1	1
ENSMUSG00000085707	0.528779	0.381968	0.675591	1.76871	0.822698	1	1
ENSMUSG00000087207	1.05756	0.763936	1.35118	1.76871	0.822698	0.93222	1
ENSMUSG00000087230	0.528779	0.381968	0.675591	1.76871	0.822698	1	1
ENSMUSG00000087670	0.528779	0.381968	0.675591	1.76871	0.822698	1	1
ENSMUSG00000094286	0.528779	0.381968	0.675591	1.76871	0.822698	1	1
ENSMUSG00000087142	13.3231	9.62828	17.0179	1.76749	0.821705	0.163207	1
ENSMUSG00000026175	9.17537	6.6314	11.7193	1.76725	0.821506	0.265383	1	Vil1
ENSMUSG00000031097	11.9456	8.63423	15.257	1.76704	0.821332	0.222975	1	Tnni2
ENSMUSG00000082941	1.9139	1.38338	2.44442	1.76699	0.821291	0.757592	1
ENSMUSG00000070443	1.58502	1.1459	2.02415	1.76642	0.820828	0.706322	1
ENSMUSG00000090665	1.58502	1.1459	2.02415	1.76642	0.820828	0.706322	1
ENSMUSG00000018919	0.989609	0.715772	1.26345	1.76515	0.819791	0.92626	1	Tm4sf5
ENSMUSG00000085298	0.989609	0.715772	1.26345	1.76515	0.819791	0.92626	1	F730035M05Rik
ENSMUSG00000072809	15.89	11.4973	20.2827	1.76412	0.818952	0.179093	1
ENSMUSG00000070637	5.07693	3.67519	6.47867	1.76281	0.817879	0.447616	1	Gm694
ENSMUSG00000078958	5.77897	4.18346	7.37449	1.76278	0.817849	0.34343	1	Atp6ap1l
ENSMUSG00000041301	0.46083	0.333804	0.587855	1.76108	0.816457	1	1	Cftr
ENSMUSG00000044361	0.46083	0.333804	0.587855	1.76108	0.816457	1	1	BC024139
ENSMUSG00000049608	0.46083	0.333804	0.587855	1.76108	0.816457	1	1	Gpr55
ENSMUSG00000049848	0.46083	0.333804	0.587855	1.76108	0.816457	1	1	Ceacam19
ENSMUSG00000052673	0.46083	0.333804	0.587855	1.76108	0.816457	1	1
ENSMUSG00000076666	0.46083	0.333804	0.587855	1.76108	0.816457	1	1
ENSMUSG00000080719	0.46083	0.333804	0.587855	1.76108	0.816457	1	1
ENSMUSG00000081196	0.46083	0.333804	0.587855	1.76108	0.816457	1	1
ENSMUSG00000082151	0.46083	0.333804	0.587855	1.76108	0.816457	1	1
ENSMUSG00000082760	0.46083	0.333804	0.587855	1.76108	0.816457	1	1
ENSMUSG00000082873	0.46083	0.333804	0.587855	1.76108	0.816457	1	1
ENSMUSG00000086735	0.46083	0.333804	0.587855	1.76108	0.816457	1	1
ENSMUSG00000089082	0.46083	0.333804	0.587855	1.76108	0.816457	1	1
ENSMUSG00000089713	0.46083	0.333804	0.587855	1.76108	0.816457	1	1
ENSMUSG00000090023	0.46083	0.333804	0.587855	1.76108	0.816457	1	1
ENSMUSG00000090075	0.46083	0.333804	0.587855	1.76108	0.816457	1	1
ENSMUSG00000092512	0.46083	0.333804	0.587855	1.76108	0.816457	1	1
ENSMUSG00000094201	0.46083	0.333804	0.587855	1.76108	0.816457	1	1
ENSMUSG00000095454	0.46083	0.333804	0.587855	1.76108	0.816457	1	1
ENSMUSG00000081590	2.12832	1.54286	2.71378	1.75893	0.814699	0.646159	1
ENSMUSG00000032415	17.6552	12.8027	22.5078	1.75805	0.813975	0.143187	1	Ube2cbp
ENSMUSG00000097479	4.81282	3.49003	6.13561	1.75804	0.813968	0.462992	1
ENSMUSG00000049409	12.0136	8.71236	15.3149	1.75784	0.8138	0.221651	1	Prokr1
ENSMUSG00000033633	7.32331	5.31117	9.33546	1.7577	0.813692	0.33173	1	Clec18a
ENSMUSG00000084885	4.51449	3.27503	5.75395	1.75691	0.813044	0.43075	1	3010001F23Rik
ENSMUSG00000030483	3.5825	2.59993	4.56508	1.75585	0.812169	0.530553	1	Cyp2b10
ENSMUSG00000097404	5.01778	3.64201	6.39356	1.7555	0.811883	0.45246	1	Gm10814
ENSMUSG00000084000	1.58877	1.1534	2.02415	1.75494	0.811425	0.705904	1
ENSMUSG00000097368	5.57822	4.05395	7.10249	1.75199	0.808997	0.42752	1	Gm10390
ENSMUSG00000021071	1.06131	0.771429	1.35118	1.75153	0.808617	0.923984	1	Trim9
ENSMUSG00000028031	4.86717	3.53819	6.19615	1.75122	0.808359	0.507405	1	Dkk2
ENSMUSG00000044206	43.2646	31.4571	55.0722	1.75071	0.807941	0.0699643	1	Vsig4
ENSMUSG00000046240	1.8363	1.33522	2.33738	1.75056	0.807816	0.764771	1	Hepacam
ENSMUSG00000092981	7.25238	5.2737	9.23105	1.75039	0.807679	0.304965	1
ENSMUSG00000087644	20.8949	15.1951	26.5947	1.75021	0.807529	0.124	1
ENSMUSG00000006638	208.529	151.661	265.397	1.74993	0.807297	0.0680324	1	Abhd1
ENSMUSG00000008874	2.63405	1.91733	3.35076	1.74762	0.80539	0.599965	1	Clec3a
ENSMUSG00000077191	4.54467	3.30821	5.78114	1.74751	0.805304	0.475511	1
ENSMUSG00000040046	0.993356	0.723265	1.26345	1.74686	0.804767	0.925902	1	Tph1
ENSMUSG00000003354	4.09461	2.9819	5.20733	1.74631	0.804313	0.499684	1	Ccdc65
ENSMUSG00000078592	2.58587	1.88416	3.28759	1.74486	0.803114	0.603856	1
ENSMUSG00000073405	6.49118	4.73226	8.25011	1.74338	0.801884	0.722352	1
ENSMUSG00000075502	4.03304	2.94123	5.12485	1.74242	0.801093	0.503307	1	Zbtbd6
ENSMUSG00000081103	5.69088	4.15028	7.23147	1.74241	0.801081	0.38295	1
ENSMUSG00000022286	50.988	37.1919	64.784	1.74188	0.800648	0.0368661	1	Grhl2
ENSMUSG00000088944	3.42048	2.49611	4.34485	1.74065	0.799625	0.603879	1
ENSMUSG00000092795	0.914638	0.667609	1.16167	1.74004	0.799122	0.933822	1
ENSMUSG00000092989	0.914638	0.667609	1.16167	1.74004	0.799122	0.933822	1
ENSMUSG00000048485	3.33275	2.43296	4.23255	1.73967	0.798814	0.609723	1	Zbtb8b
ENSMUSG00000015093	0.979957	0.715772	1.24414	1.73818	0.797579	0.927193	1	Clic3
ENSMUSG00000025754	1.95991	1.43154	2.48828	1.73818	0.797579	0.753513	1	Agbl1
ENSMUSG00000093924	0.979957	0.715772	1.24414	1.73818	0.797579	0.927193	1
ENSMUSG00000044279	2.12241	1.55035	2.69448	1.73798	0.79741	0.646702	1	Crb3
ENSMUSG00000009588	0.532526	0.389461	0.675591	1.73468	0.794671	1	1	St6galc1
ENSMUSG00000052730	0.532526	0.389461	0.675591	1.73468	0.794671	1	1	Gm5111
ENSMUSG00000080726	0.532526	0.389461	0.675591	1.73468	0.794671	1	1
ENSMUSG00000081511	0.532526	0.389461	0.675591	1.73468	0.794671	1	1
ENSMUSG00000086326	0.532526	0.389461	0.675591	1.73468	0.794671	1	1
ENSMUSG00000050195	1164.11	851.687	1476.53	1.73365	0.793812	0.233915	1	Scd4
ENSMUSG00000051076	0.912008	0.667609	1.15641	1.73216	0.792574	0.934101	1	Vtcn1
ENSMUSG00000076271	0.912008	0.667609	1.15641	1.73216	0.792574	0.934101	1
ENSMUSG00000076523	0.912008	0.667609	1.15641	1.73216	0.792574	0.934101	1
ENSMUSG00000073843	3.52938	2.58494	4.47382	1.73073	0.791377	0.534029	1
ENSMUSG00000072960	10.0307	7.34717	12.7143	1.7305	0.791193	0.25137	1
ENSMUSG00000016150	3.09272	2.26612	3.91932	1.72952	0.790375	0.56402	1	Tenm1
ENSMUSG00000085538	7.07328	5.18487	8.96169	1.72843	0.789463	0.340385	1
ENSMUSG00000005716	6.19044	4.5396	7.84127	1.7273	0.78852	0.404901	1	Pvalb
ENSMUSG00000040724	24.5482	18.0026	31.0939	1.7272	0.788432	0.14046	1	Kc2
ENSMUSG00000024873	1.43114	1.04958	1.81269	1.72707	0.788328	0.831395	1	Cnih2
ENSMUSG00000069378	2.35083	1.72468	2.97699	1.72611	0.787525	0.856853	1	Prdm6
ENSMUSG00000027296	6.33822	4.65092	8.02552	1.72558	0.787079	0.398708	1	Itpka
ENSMUSG00000046101	3.77934	2.77426	4.78443	1.72458	0.786246	0.59538	1	Mcmdc2
ENSMUSG00000042604	127.485	93.6063	161.363	1.72385	0.785632	0.0139892	1	Kc4
ENSMUSG00000044024	3.86312	2.83741	4.88883	1.72299	0.784918	0.570158	1	Rell2
ENSMUSG00000021456	213.322	156.721	269.923	1.72231	0.784345	0.223359	1	Fbp2
ENSMUSG00000080793	0.983704	0.723265	1.24414	1.72017	0.782554	0.92683	1
ENSMUSG00000086947	6.53222	4.8029	8.26154	1.72011	0.782504	0.356648	1	4930522O17Rik
ENSMUSG00000085965	2.61586	1.92483	3.3069	1.71802	0.78075	0.601422	1
ENSMUSG00000054763	4.44054	3.26754	5.61355	1.71798	0.780711	0.532828	1	Defb42
ENSMUSG00000097811	1.81436	1.33522	2.29351	1.7177	0.780482	0.779922	1
ENSMUSG00000090174	4.43923	3.26754	5.61093	1.71717	0.780036	0.481296	1
ENSMUSG00000032579	450.082	331.37	568.794	1.71649	0.779465	0.0374376	1	Hemk1
ENSMUSG00000087377	3.55139	2.61491	4.48787	1.71626	0.779266	0.53258	1
ENSMUSG00000086638	5.56809	4.10211	7.03406	1.71474	0.77799	0.427976	1	4930405A21Rik
ENSMUSG00000096971	22.5863	16.6415	28.5311	1.71445	0.777747	0.140813	1
ENSMUSG00000021047	75.4161	55.5762	95.256	1.71397	0.777343	0.0249343	1	Nova1
ENSMUSG00000006574	15.6362	11.5231	19.7492	1.71388	0.777263	0.217101	1	Slc4a1
ENSMUSG00000030111	32.4033	23.8842	40.9225	1.71337	0.776838	0.12821	1	A2m
ENSMUSG00000096870	8.89701	6.56076	11.2333	1.71219	0.775843	0.321391	1
ENSMUSG00000020838	5.19492	3.83133	6.55851	1.71181	0.775524	0.54339	1	Slc6a4
ENSMUSG00000086724	2.33724	1.72468	2.9498	1.71035	0.774288	0.703566	1
ENSMUSG00000042870	43.035	31.7629	54.3071	1.70976	0.773798	0.0579029	1	Tom1
ENSMUSG00000034533	16.9795	12.5322	21.4268	1.70975	0.773782	0.314732	1	Scn10a
ENSMUSG00000084025	4.1051	3.03006	5.18014	1.70958	0.773644	0.448313	1
ENSMUSG00000066592	1.4868	1.09774	1.87587	1.70884	0.77302	0.826023	1
ENSMUSG00000019836	5.87715	4.33946	7.41485	1.7087	0.772902	0.785866	1
ENSMUSG00000097792	1.42148	1.04958	1.79339	1.70868	0.772882	0.832354	1
ENSMUSG00000005339	1.87266	1.38338	2.36194	1.70737	0.771775	0.761359	1	Fcer1a
ENSMUSG00000081607	2.02308	1.49469	2.55146	1.70701	0.77147	0.748116	1
ENSMUSG00000032725	210.768	155.759	265.777	1.70634	0.770903	0.0137942	1	Folr2
ENSMUSG00000044320	19.9568	14.7499	25.1636	1.70602	0.770639	0.158219	1	1700001O22Rik
ENSMUSG00000089746	11.4663	8.47488	14.4577	1.70594	0.770571	0.247551	1
ENSMUSG00000030935	0.967675	0.715772	1.21958	1.70386	0.768809	0.928397	1	Acsm3
ENSMUSG00000086083	0.967675	0.715772	1.21958	1.70386	0.768809	0.928397	1
ENSMUSG00000009941	0.902356	0.667609	1.1371	1.70325	0.768288	0.935134	1	Nxf2
ENSMUSG00000021416	0.902356	0.667609	1.1371	1.70325	0.768288	0.935134	1	Eci3
ENSMUSG00000022066	0.451178	0.333804	0.568552	1.70325	0.768288	1	1	Gm21685
ENSMUSG00000029517	0.451178	0.333804	0.568552	1.70325	0.768288	1	1	Ankrd7
ENSMUSG00000062279	0.451178	0.333804	0.568552	1.70325	0.768288	1	1
ENSMUSG00000064349	0.451178	0.333804	0.568552	1.70325	0.768288	1	1
ENSMUSG00000072673	0.451178	0.333804	0.568552	1.70325	0.768288	1	1
ENSMUSG00000073242	0.451178	0.333804	0.568552	1.70325	0.768288	1	1	Dnmt3aos
ENSMUSG00000082250	0.451178	0.333804	0.568552	1.70325	0.768288	1	1
ENSMUSG00000082296	0.451178	0.333804	0.568552	1.70325	0.768288	1	1
ENSMUSG00000083223	0.451178	0.333804	0.568552	1.70325	0.768288	1	1
ENSMUSG00000083440	0.451178	0.333804	0.568552	1.70325	0.768288	1	1
ENSMUSG00000085744	0.451178	0.333804	0.568552	1.70325	0.768288	1	1
ENSMUSG00000086098	0.451178	0.333804	0.568552	1.70325	0.768288	1	1
ENSMUSG00000086707	0.451178	0.333804	0.568552	1.70325	0.768288	1	1
ENSMUSG00000087115	0.451178	0.333804	0.568552	1.70325	0.768288	1	1	Pcsk2os2
ENSMUSG00000087306	0.451178	0.333804	0.568552	1.70325	0.768288	1	1	LOC102637814
ENSMUSG00000091133	0.451178	0.333804	0.568552	1.70325	0.768288	1	1
ENSMUSG00000091283	0.451178	0.333804	0.568552	1.70325	0.768288	1	1
ENSMUSG00000094191	0.451178	0.333804	0.568552	1.70325	0.768288	1	1
ENSMUSG00000096563	0.451178	0.333804	0.568552	1.70325	0.768288	1	1
ENSMUSG00000096594	0.451178	0.333804	0.568552	1.70325	0.768288	1	1
ENSMUSG00000096670	0.451178	0.333804	0.568552	1.70325	0.768288	1	1
ENSMUSG00000000320	73.625	54.4754	92.7746	1.70306	0.768126	0.0358946	1	Alox12
ENSMUSG00000069515	29.6867	21.9675	37.406	1.70278	0.767895	0.537608	1	Lyz1
ENSMUSG00000044505	2.46085	1.82101	3.1007	1.70274	0.76786	0.693525	1	Lingo4
ENSMUSG00000055494	8.31284	6.15311	10.4726	1.702	0.767229	0.310099	1
ENSMUSG00000039452	7.12943	5.27786	8.98099	1.70164	0.766923	0.405495	1	Snx22
ENSMUSG00000083183	8.36607	6.19378	10.5384	1.70144	0.76676	0.335194	1
ENSMUSG00000083853	7.4624	5.52617	9.39864	1.70075	0.766173	0.330506	1
ENSMUSG00000072769	9.47188	7.02086	11.9229	1.69821	0.764015	0.307369	1
ENSMUSG00000036330	16.2366	12.0378	20.4354	1.6976	0.763494	0.559777	1	Slc18a1
ENSMUSG00000039865	4.38392	3.25255	5.5153	1.69568	0.761867	0.53593	1	Slc44a3
ENSMUSG00000065952	5.08907	3.7758	6.40234	1.69562	0.761815	0.448953	1	C330021F23Rik
ENSMUSG00000058932	2.97847	2.21047	3.74647	1.69488	0.761181	0.642502	1
ENSMUSG00000059857	1.99365	1.47971	2.50759	1.69465	0.760988	0.750603	1	Ntng1
ENSMUSG00000097219	0.974052	0.723265	1.22484	1.69348	0.759995	0.927769	1
ENSMUSG00000030672	8.32943	6.18628	10.4726	1.69287	0.759471	0.309588	1	Mylpf
ENSMUSG00000085397	1.47715	1.09774	1.85656	1.69126	0.758097	0.826936	1
ENSMUSG00000034912	14.1167	10.496	17.7374	1.68991	0.756949	0.182339	1	Mdga2
ENSMUSG00000093044	5.66623	4.21329	7.11917	1.68969	0.756761	0.466007	1
ENSMUSG00000054978	70.1755	52.1913	88.1596	1.68916	0.756307	0.172168	1	Kbtbd13
ENSMUSG00000097757	4.97016	3.69767	6.24265	1.68827	0.755543	0.454846	1
ENSMUSG00000064653	5.38393	4.00579	6.76207	1.68808	0.755379	0.436505	1
ENSMUSG00000014301	15.5042	11.5381	19.4702	1.68747	0.754862	0.182193	1	Pam16
ENSMUSG00000096463	0.971422	0.723265	1.21958	1.68621	0.753785	0.928028	1
ENSMUSG00000025127	16.637	12.3877	20.8863	1.68605	0.753651	0.366339	1	Gcgr
ENSMUSG00000093244	1.4943	1.11273	1.87587	1.68583	0.753457	0.82532	1
ENSMUSG00000030911	17.2565	12.851	21.662	1.68563	0.753284	0.145318	1	Zp2
ENSMUSG00000061080	89.8256	66.8984	112.753	1.68544	0.753122	0.24512	1	Lsamp
ENSMUSG00000050675	1.4092	1.04958	1.76883	1.68528	0.752984	0.833586	1	Gp1ba
ENSMUSG00000079235	1.4092	1.04958	1.76883	1.68528	0.752984	0.833586	1	Ccdc13
ENSMUSG00000059108	5.74168	4.27644	7.20691	1.68526	0.752969	0.462552	1	Ifitm6
ENSMUSG00000043648	4.03303	3.00437	5.06168	1.68477	0.752551	0.503308	1	Pld6
ENSMUSG00000035606	324.24	241.575	406.904	1.68438	0.752219	0.0766604	1	Ky
ENSMUSG00000028354	2.97651	2.21796	3.73506	1.68401	0.751899	0.572622	1	Fmn2
ENSMUSG00000064738	2.43254	1.81351	3.05158	1.68269	0.750768	0.695764	1
ENSMUSG00000050612	6.75931	5.04038	8.47825	1.68207	0.750234	0.384197	1	Txndc2
ENSMUSG00000016346	1.4809	1.10523	1.85656	1.67979	0.748282	0.826581	1	Kcnq2
ENSMUSG00000045699	1.4809	1.10523	1.85656	1.67979	0.748282	0.826581	1
ENSMUSG00000087433	5.95705	4.44662	7.46749	1.67936	0.747915	0.412618	1	LOC102633071
ENSMUSG00000040705	3.0258	2.25863	3.79297	1.67932	0.747881	0.568915	1
ENSMUSG00000058159	5.98628	4.4691	7.50346	1.67897	0.747573	0.451829	1
ENSMUSG00000087176	9.49755	7.0915	11.9036	1.67857	0.747233	0.30668	1
ENSMUSG00000094989	1.04312	0.778922	1.30731	1.67836	0.747055	0.92129	1
ENSMUSG00000085527	9.02483	6.74271	11.307	1.67691	0.745809	0.317738	1
ENSMUSG00000078588	3.34877	2.5036	4.19394	1.67516	0.744301	0.60864	1	Ccdc24
ENSMUSG00000064621	0.892704	0.667609	1.1178	1.67433	0.743586	0.93618	1	AF357355
ENSMUSG00000069170	5.18741	3.87949	6.49534	1.67428	0.743537	0.537512	1	Gpr98
ENSMUSG00000027375	613.705	459.056	768.354	1.67377	0.743099	0.00834214	1	Mal
ENSMUSG00000051067	139.238	104.166	174.31	1.67339	0.742775	0.0366972	1	Lingo3
ENSMUSG00000078810	1.41295	1.05707	1.76883	1.67333	0.742721	0.833208	1	Gp6
ENSMUSG00000017002	3.19704	2.39229	4.00179	1.67279	0.742254	0.688422	1	Slpi
ENSMUSG00000087475	6.96888	5.21471	8.72305	1.67278	0.742246	0.425775	1	4933406I18Rik
ENSMUSG00000022619	3.53639	2.64809	4.4247	1.6709	0.740625	0.533566	1	Mapk8ip2
ENSMUSG00000084162	1.02972	0.771429	1.28801	1.66964	0.739539	0.922504	1
ENSMUSG00000097575	1.02972	0.771429	1.28801	1.66964	0.739539	0.922504	1
ENSMUSG00000082160	2.37472	1.78034	2.9691	1.66772	0.737877	0.700447	1
ENSMUSG00000087949	1.90903	1.43154	2.38651	1.66708	0.737328	0.758032	1
ENSMUSG00000084843	6.33924	4.75474	7.92374	1.66649	0.736816	0.398666	1
ENSMUSG00000087404	2.05681	1.54286	2.57076	1.66623	0.73659	0.745325	1
ENSMUSG00000057457	4.26134	3.19689	5.32578	1.66592	0.736322	0.542854	1	Phex
ENSMUSG00000057173	7.93849	5.9563	9.92069	1.66558	0.736024	0.346679	1	Rfx8
ENSMUSG00000053964	316.307	237.396	395.218	1.6648	0.735351	0.100145	1	Lgals4
ENSMUSG00000090202	1.99149	1.49469	2.48828	1.66474	0.735301	0.750787	1	4930503B20Rik
ENSMUSG00000046338	2.95458	2.21796	3.69119	1.66423	0.734854	0.574299	1	Gpat2
ENSMUSG00000036882	11.2053	8.41173	13.9988	1.6642	0.734828	0.272732	1	Arhgap33
ENSMUSG00000089242	6.84983	5.1442	8.55546	1.66313	0.7339	0.380713	1
ENSMUSG00000020908	1.47125	1.10523	1.83726	1.66233	0.733203	0.827498	1	Myh3
ENSMUSG00000088086	4.5512	3.41952	5.68288	1.66189	0.732829	0.475159	1
ENSMUSG00000091418	7.10146	5.33685	8.86606	1.66129	0.732304	0.371426	1	Gm3164
ENSMUSG00000023328	21.7457	16.3528	27.1386	1.65957	0.730811	0.154037	1	Ache
ENSMUSG00000089269	0.96177	0.723265	1.20027	1.65952	0.730767	0.928982	1
ENSMUSG00000030433	15.5824	11.7201	19.4448	1.6591	0.7304	0.193821	1	Sbk2
ENSMUSG00000084974	1.46862	1.10523	1.832	1.65757	0.729066	0.827749	1
ENSMUSG00000086255	1.46862	1.10523	1.832	1.65757	0.729066	0.827749	1
ENSMUSG00000091419	1.46862	1.10523	1.832	1.65757	0.729066	0.827749	1
ENSMUSG00000077440	16.0928	12.1169	20.0686	1.65625	0.727921	0.203289	1
ENSMUSG00000086879	5.438	4.09462	6.78138	1.65617	0.727848	0.433953	1
ENSMUSG00000031860	1.91014	1.43904	2.38125	1.65475	0.726612	0.757931	1	Pbx4
ENSMUSG00000065399	17.3816	13.096	21.6672	1.6545	0.726391	0.189001	1
ENSMUSG00000024502	0.506845	0.381968	0.631723	1.65386	0.725841	1	1	Jakmip2
ENSMUSG00000030226	0.506845	0.381968	0.631723	1.65386	0.725841	1	1	Lmo3
ENSMUSG00000042401	0.506845	0.381968	0.631723	1.65386	0.725841	1	1	Crtac1
ENSMUSG00000053821	1.01369	0.763936	1.26345	1.65386	0.725841	0.923982	1
ENSMUSG00000064247	0.506845	0.381968	0.631723	1.65386	0.725841	1	1	Plcxd1
ENSMUSG00000077202	0.506845	0.381968	0.631723	1.65386	0.725841	1	1
ENSMUSG00000083737	1.52054	1.1459	1.89517	1.65386	0.725841	0.822893	1
ENSMUSG00000084004	0.506845	0.381968	0.631723	1.65386	0.725841	1	1
ENSMUSG00000084453	0.506845	0.381968	0.631723	1.65386	0.725841	1	1
ENSMUSG00000085608	0.506845	0.381968	0.631723	1.65386	0.725841	1	1
ENSMUSG00000085992	0.506845	0.381968	0.631723	1.65386	0.725841	1	1
ENSMUSG00000086459	0.506845	0.381968	0.631723	1.65386	0.725841	1	1
ENSMUSG00000086799	0.506845	0.381968	0.631723	1.65386	0.725841	1	1	4930502E09Rik
ENSMUSG00000090323	0.506845	0.381968	0.631723	1.65386	0.725841	1	1
ENSMUSG00000091442	0.506845	0.381968	0.631723	1.65386	0.725841	1	1
ENSMUSG00000094421	0.506845	0.381968	0.631723	1.65386	0.725841	1	1
ENSMUSG00000097470	0.506845	0.381968	0.631723	1.65386	0.725841	1	1
ENSMUSG00000074219	14.544	10.9636	18.1243	1.65313	0.725199	0.239303	1
ENSMUSG00000044056	3.51183	2.64809	4.37557	1.65235	0.724517	0.535194	1	Efcab9
ENSMUSG00000083707	1.98184	1.49469	2.46898	1.65183	0.724065	0.751614	1
ENSMUSG00000055015	3.29872	2.48861	4.10883	1.65105	0.723385	0.681836	1	Gm9961
ENSMUSG00000090005	5.27925	3.98331	6.57518	1.65068	0.723064	0.485135	1
ENSMUSG00000004814	35.8444	27.0489	44.64	1.65035	0.72277	0.101879	1	Ccl24
ENSMUSG00000041323	0.948372	0.715772	1.18097	1.64993	0.722401	0.930328	1	Ak7
ENSMUSG00000084133	0.948372	0.715772	1.18097	1.64993	0.722401	0.930328	1
ENSMUSG00000085002	0.948372	0.715772	1.18097	1.64993	0.722401	0.930328	1
ENSMUSG00000082017	9.47346	7.15036	11.7966	1.64978	0.722277	0.307326	1
ENSMUSG00000037005	10.6155	8.01478	13.2162	1.64897	0.721569	0.330368	1	Xpnpep2
ENSMUSG00000034472	42.178	31.8476	52.5085	1.64874	0.721366	0.0646186	1	Rasd2
ENSMUSG00000092679	1.3899	1.04958	1.73022	1.64849	0.721147	0.83555	1
ENSMUSG00000032425	300.901	227.348	374.454	1.64705	0.719885	0.045469	1	Zfp949
ENSMUSG00000086401	7.60793	5.74879	9.46707	1.64679	0.719659	0.325621	1	Gm15559
ENSMUSG00000036045	4.82938	3.6495	6.00926	1.6466	0.719487	0.56158	1
ENSMUSG00000087476	1.45259	1.09774	1.80743	1.6465	0.719406	0.829294	1
ENSMUSG00000070999	1.91389	1.44653	2.38125	1.64618	0.719119	0.757593	1	Ccin
ENSMUSG00000005883	0.441526	0.333804	0.549248	1.64542	0.718455	1	1	Spo11
ENSMUSG00000021609	0.441526	0.333804	0.549248	1.64542	0.718455	1	1	Slc6a3
ENSMUSG00000026787	0.441526	0.333804	0.549248	1.64542	0.718455	1	1	Gad2
ENSMUSG00000030792	0.441526	0.333804	0.549248	1.64542	0.718455	1	1	Dkkl1
ENSMUSG00000039521	0.441526	0.333804	0.549248	1.64542	0.718455	1	1	Foxp3
ENSMUSG00000047061	0.441526	0.333804	0.549248	1.64542	0.718455	1	1
ENSMUSG00000048031	0.441526	0.333804	0.549248	1.64542	0.718455	1	1	Fcrl5
ENSMUSG00000051985	0.441526	0.333804	0.549248	1.64542	0.718455	1	1	Igfn1
ENSMUSG00000071680	0.441526	0.333804	0.549248	1.64542	0.718455	1	1
ENSMUSG00000077345	0.441526	0.333804	0.549248	1.64542	0.718455	1	1
ENSMUSG00000078865	0.441526	0.333804	0.549248	1.64542	0.718455	1	1
ENSMUSG00000081185	0.441526	0.333804	0.549248	1.64542	0.718455	1	1
ENSMUSG00000092086	0.441526	0.333804	0.549248	1.64542	0.718455	1	1	Gm6793
ENSMUSG00000094131	0.441526	0.333804	0.549248	1.64542	0.718455	1	1
ENSMUSG00000096459	0.441526	0.333804	0.549248	1.64542	0.718455	1	1
ENSMUSG00000096939	0.441526	0.333804	0.549248	1.64542	0.718455	1	1
ENSMUSG00000097019	0.441526	0.333804	0.549248	1.64542	0.718455	1	1
ENSMUSG00000096557	13.6792	10.3441	17.0144	1.64485	0.717955	0.249636	1
ENSMUSG00000001901	1.96581	1.4872	2.44442	1.64364	0.71689	0.753	1	Kcnh6
ENSMUSG00000044199	8.62642	6.52758	10.7253	1.64307	0.716392	0.356907	1	S1pr4
ENSMUSG00000047953	3.50855	2.65558	4.36152	1.6424	0.715803	0.535412	1	Gp5
ENSMUSG00000048174	39.7288	30.0788	49.3788	1.64165	0.715146	0.0860145	1	Tmem81
ENSMUSG00000034584	8.05162	6.09745	10.0058	1.64098	0.714559	0.374414	1	Exph5
ENSMUSG00000083534	1.45896	1.10523	1.81269	1.6401	0.713784	0.828677	1
ENSMUSG00000038486	95.7328	72.549	118.917	1.63912	0.712923	0.0278697	1	Sv2a
ENSMUSG00000097165	1.83517	1.39087	2.27947	1.63887	0.712704	0.764879	1
ENSMUSG00000070547	5.76922	4.37277	7.16567	1.6387	0.712553	0.505635	1	Mrgprb1
ENSMUSG00000082782	7.22687	5.478	8.97573	1.6385	0.71238	0.401875	1
ENSMUSG00000032034	890.996	675.418	1106.57	1.63836	0.712249	0.0190003	1	Kcnj5
ENSMUSG00000049303	81.8233	62.0409	101.606	1.63772	0.71169	0.237041	1	Syt12
ENSMUSG00000008999	33.1686	25.1498	41.1875	1.63768	0.711655	0.263217	1	Bmp7
ENSMUSG00000024053	694.612	526.723	862.501	1.63749	0.711483	0.0114317	1	Emilin2
ENSMUSG00000019214	28.215	21.3965	35.0334	1.63734	0.711355	0.107887	1	Chtf18
ENSMUSG00000026870	21.3122	16.1667	26.4578	1.63656	0.710669	0.139501	1	Cutal
ENSMUSG00000096775	2.49355	1.89165	3.09544	1.63637	0.710502	0.690983	1	Gm5796
ENSMUSG00000085715	2.78597	2.11414	3.4578	1.63556	0.709785	0.734927	1	Tsix
ENSMUSG00000083274	2.48278	1.88416	3.0814	1.63543	0.709668	0.691815	1
ENSMUSG00000044937	52.7423	40.0399	65.4448	1.63449	0.708839	0.0667719	1	BC030307
ENSMUSG00000083831	10.7533	8.16676	13.3399	1.63344	0.70791	0.303192	1
ENSMUSG00000029516	101.48	77.0851	125.875	1.63294	0.70747	0.0309834	1	Cit
ENSMUSG00000028976	0.952118	0.723265	1.18097	1.63283	0.707376	0.929949	1	Slc2a5
ENSMUSG00000081985	0.952118	0.723265	1.18097	1.63283	0.707376	0.929949	1
ENSMUSG00000085066	0.952118	0.723265	1.18097	1.63283	0.707376	0.929949	1
ENSMUSG00000041261	767.07	583.182	950.959	1.63064	0.705438	0.012094	1	Car8
ENSMUSG00000000416	62.843	47.7806	77.9055	1.63048	0.705301	0.0572112	1	Cttnbp2
ENSMUSG00000043795	103.777	78.9054	128.65	1.63043	0.705249	0.136392	1	Prr33
ENSMUSG00000029727	1.00404	0.763936	1.24414	1.6286	0.703628	0.924887	1	Cyp3a13
ENSMUSG00000065750	1.00404	0.763936	1.24414	1.6286	0.703628	0.924887	1
ENSMUSG00000081248	1.00404	0.763936	1.24414	1.6286	0.703628	0.924887	1
ENSMUSG00000031803	101.45	77.2162	125.684	1.62769	0.702824	0.313675	1	B3gnt3
ENSMUSG00000025916	2.51867	1.91733	3.12001	1.62726	0.702449	0.689061	1	Ppp1r42
ENSMUSG00000085733	4.29227	3.26754	5.317	1.62722	0.702409	0.541079	1
ENSMUSG00000084880	3.38569	2.57745	4.19394	1.62717	0.702363	0.60617	1	Tomm6os
ENSMUSG00000028546	1.95353	1.4872	2.41985	1.62712	0.702319	0.754072	1	Elavl4
ENSMUSG00000065315	4.4572	3.39384	5.52056	1.62664	0.701897	0.531927	1
ENSMUSG00000085311	6.871	5.23303	8.50896	1.62601	0.701336	0.415017	1
ENSMUSG00000084192	1.37762	1.04958	1.70565	1.62509	0.700518	0.836818	1
ENSMUSG00000083649	39.6675	30.2352	49.0998	1.62393	0.699488	0.108903	1	Rasl2-9
ENSMUSG00000032589	2.82693	2.15481	3.49904	1.62383	0.699401	0.653541	1	Bsn
ENSMUSG00000072949	39.1847	29.8714	48.4979	1.62356	0.699157	0.0865037	1	Acot1
ENSMUSG00000078184	25.7051	19.5977	31.8125	1.62328	0.698908	0.17231	1
ENSMUSG00000053613	4.99554	3.80898	6.1821	1.62303	0.698693	0.500969	1
ENSMUSG00000060198	0.93872	0.715772	1.16167	1.62296	0.698625	0.931311	1
ENSMUSG00000081132	0.93872	0.715772	1.16167	1.62296	0.698625	0.931311	1
ENSMUSG00000082571	1.44931	1.10523	1.79339	1.62264	0.698339	0.829612	1
ENSMUSG00000029282	0.510592	0.389461	0.631723	1.62204	0.697813	1	1	Amtn
ENSMUSG00000045314	0.510592	0.389461	0.631723	1.62204	0.697813	1	1	Sowahb
ENSMUSG00000049154	0.510592	0.389461	0.631723	1.62204	0.697813	1	1	Fam183b
ENSMUSG00000054385	0.510592	0.389461	0.631723	1.62204	0.697813	1	1	Ceacam2
ENSMUSG00000065541	0.510592	0.389461	0.631723	1.62204	0.697813	1	1	Mir24-2
ENSMUSG00000073407	0.510592	0.389461	0.631723	1.62204	0.697813	1	1	Gm6034
ENSMUSG00000078504	0.510592	0.389461	0.631723	1.62204	0.697813	1	1	Gm438
ENSMUSG00000081211	0.510592	0.389461	0.631723	1.62204	0.697813	1	1
ENSMUSG00000082029	0.510592	0.389461	0.631723	1.62204	0.697813	1	1
ENSMUSG00000082705	0.510592	0.389461	0.631723	1.62204	0.697813	1	1
ENSMUSG00000083081	0.510592	0.389461	0.631723	1.62204	0.697813	1	1
ENSMUSG00000083785	0.510592	0.389461	0.631723	1.62204	0.697813	1	1
ENSMUSG00000086224	0.510592	0.389461	0.631723	1.62204	0.697813	1	1
ENSMUSG00000086709	0.510592	0.389461	0.631723	1.62204	0.697813	1	1
ENSMUSG00000090107	0.510592	0.389461	0.631723	1.62204	0.697813	1	1	Gm11492
ENSMUSG00000097155	0.510592	0.389461	0.631723	1.62204	0.697813	1	1
ENSMUSG00000097893	0.510592	0.389461	0.631723	1.62204	0.697813	1	1
ENSMUSG00000097904	0.510592	0.389461	0.631723	1.62204	0.697813	1	1
ENSMUSG00000027894	34.5895	26.3921	42.7869	1.6212	0.697065	0.273891	1	Slc6a17
ENSMUSG00000070336	9.31713	7.10969	11.5246	1.62096	0.696853	0.311592	1	Fbxo47
ENSMUSG00000087175	1.38399	1.05707	1.71092	1.61855	0.694698	0.836158	1	Gm15133
ENSMUSG00000020264	231.247	176.642	285.853	1.61826	0.694448	0.179419	1	Slc36a2
ENSMUSG00000085012	5.79573	4.42843	7.16304	1.61751	0.693778	0.46012	1
ENSMUSG00000082070	10.6875	8.16676	13.2083	1.61732	0.693606	0.304792	1
ENSMUSG00000010051	110.903	84.774	137.031	1.61643	0.692812	0.0433087	1	Hyal1
ENSMUSG00000079388	1.51838	1.16089	1.87587	1.61589	0.692325	0.82309	1
ENSMUSG00000028033	29.1812	22.3199	36.0424	1.61481	0.691364	0.142725	1	Kcnq5
ENSMUSG00000035615	4.26133	3.26004	5.26261	1.61428	0.690887	0.542855	1	Frmpd1
ENSMUSG00000025504	52.212	39.9523	64.4717	1.61372	0.690388	0.0651384	1	Eps8l2
ENSMUSG00000083655	8.82152	6.75021	10.8928	1.6137	0.690376	0.380605	1
ENSMUSG00000058925	1.00779	0.771429	1.24414	1.61278	0.689547	0.924535	1	1700011I03Rik
ENSMUSG00000090544	1.00779	0.771429	1.24414	1.61278	0.689547	0.924535	1
ENSMUSG00000052135	14.3245	10.9668	17.6821	1.61232	0.689142	0.223708	1	Foxo6
ENSMUSG00000044744	1.45306	1.11273	1.79339	1.61171	0.688591	0.829248	1	1700001G17Rik
ENSMUSG00000089979	4.92983	3.7758	6.08385	1.61127	0.6882	0.511919	1
ENSMUSG00000074075	5.68627	4.35778	7.01476	1.60971	0.686799	0.509351	1
ENSMUSG00000083836	3.96319	3.03755	4.88883	1.60946	0.686581	0.564176	1
ENSMUSG00000025665	11.1753	8.57121	13.7795	1.60765	0.684949	0.273412	1	Rps6ka6
ENSMUSG00000075027	171.218	131.322	211.115	1.60762	0.684923	0.0621453	1
ENSMUSG00000048794	3.37014	2.58494	4.15533	1.60752	0.684832	0.607206	1	Ccdc37
ENSMUSG00000074521	24.4351	18.7484	30.1218	1.60663	0.684038	0.13845	1	Etohi1
ENSMUSG00000040485	7.29329	5.59681	8.98978	1.60623	0.683681	0.399453	1	Lrrc52
ENSMUSG00000047807	0.942466	0.723265	1.16167	1.60614	0.6836	0.930928	1
ENSMUSG00000059824	598.725	459.482	737.967	1.60608	0.683547	0.130087	1	Dbp
ENSMUSG00000040086	1813.76	1392.47	2235.06	1.6051	0.682666	0.0298742	1	Tnni3k
ENSMUSG00000050052	87.1942	66.9709	107.418	1.60394	0.681623	0.0424222	1	Tdrp
ENSMUSG00000028957	566.023	434.813	697.233	1.60352	0.681246	0.0372479	1	Per3
ENSMUSG00000026931	0.497194	0.381968	0.612419	1.60333	0.681069	1	1	1700019N19Rik
ENSMUSG00000027849	0.497194	0.381968	0.612419	1.60333	0.681069	1	1	Syt6
ENSMUSG00000028940	0.497194	0.381968	0.612419	1.60333	0.681069	1	1	Hes2
ENSMUSG00000038599	0.497194	0.381968	0.612419	1.60333	0.681069	1	1	Capn8
ENSMUSG00000052241	0.497194	0.381968	0.612419	1.60333	0.681069	1	1
ENSMUSG00000072295	0.497194	0.381968	0.612419	1.60333	0.681069	1	1	Als2cr11
ENSMUSG00000076039	0.497194	0.381968	0.612419	1.60333	0.681069	1	1
ENSMUSG00000081928	0.497194	0.381968	0.612419	1.60333	0.681069	1	1
ENSMUSG00000085610	0.497194	0.381968	0.612419	1.60333	0.681069	1	1
ENSMUSG00000086031	0.497194	0.381968	0.612419	1.60333	0.681069	1	1
ENSMUSG00000086320	0.497194	0.381968	0.612419	1.60333	0.681069	1	1
ENSMUSG00000089271	0.497194	0.381968	0.612419	1.60333	0.681069	1	1
ENSMUSG00000091370	0.497194	0.381968	0.612419	1.60333	0.681069	1	1	5730435O14Rik
ENSMUSG00000093182	0.497194	0.381968	0.612419	1.60333	0.681069	1	1
ENSMUSG00000093619	0.497194	0.381968	0.612419	1.60333	0.681069	1	1	4930535L15Rik
ENSMUSG00000094082	0.497194	0.381968	0.612419	1.60333	0.681069	1	1
ENSMUSG00000095097	0.497194	0.381968	0.612419	1.60333	0.681069	1	1
ENSMUSG00000086859	30.9914	23.8145	38.1683	1.60274	0.680537	0.127087	1	2810008D09Rik
ENSMUSG00000019856	36.3914	27.9681	44.8146	1.60235	0.680186	0.0850244	1	Fam184a
ENSMUSG00000087367	4.28449	3.29322	5.27576	1.60201	0.679879	0.617639	1
ENSMUSG00000085667	10.4139	8.00729	12.8205	1.6011	0.679063	0.361185	1	Gm12992
ENSMUSG00000021620	2.00592	1.54286	2.46898	1.60027	0.678311	0.74956	1	Acot12
ENSMUSG00000022432	2.00592	1.54286	2.46898	1.60027	0.678311	0.74956	1	Smc1b
ENSMUSG00000077561	2.86329	2.20297	3.52361	1.59948	0.677602	0.650818	1
ENSMUSG00000087381	41.1329	31.6472	50.6186	1.59947	0.677589	0.111665	1
ENSMUSG00000064767	1.50873	1.16089	1.85656	1.59926	0.677402	0.823978	1
ENSMUSG00000071750	1.50873	1.16089	1.85656	1.59926	0.677402	0.823978	1
ENSMUSG00000065589	1.30133	1.00141	1.60124	1.59898	0.677153	0.970355	1
ENSMUSG00000062444	0.939836	0.723265	1.15641	1.59887	0.677052	0.931197	1	Ap3b2
ENSMUSG00000096056	6.68225	5.1442	8.22029	1.59797	0.676244	0.460653	1
ENSMUSG00000076618	1.37302	1.05707	1.68898	1.59779	0.676079	0.970305	1
ENSMUSG00000074109	2.02306	1.55784	2.48828	1.59726	0.675601	0.748117	1	Mrgprx2
ENSMUSG00000065432	27.3605	21.0703	33.6507	1.59706	0.675421	0.208982	1
ENSMUSG00000084821	2.87912	2.21796	3.54028	1.59619	0.674629	0.728667	1	Gm15880
ENSMUSG00000088014	1.7332	1.33522	2.13119	1.59613	0.674581	0.877491	1
ENSMUSG00000046683	7.60605	5.85997	9.35214	1.59594	0.674402	0.42239	1
ENSMUSG00000087236	17.9598	13.8374	22.0822	1.59583	0.674311	0.222173	1	Gm1305
ENSMUSG00000085249	6.6233	5.10353	8.14308	1.59558	0.67408	0.463004	1
ENSMUSG00000044647	10.1193	7.79978	12.4388	1.59476	0.673341	0.342989	1	Csrnp3
ENSMUSG00000065999	47.3149	36.4726	58.1572	1.59455	0.673145	0.159967	1	Gm13154
ENSMUSG00000044976	69.8166	53.8285	85.8047	1.59404	0.672686	0.120336	1	Wdr72
ENSMUSG00000082210	8.33147	6.42376	10.2392	1.59395	0.67261	0.42825	1
ENSMUSG00000093577	39.7542	30.6534	48.855	1.59379	0.672459	0.0980605	1
ENSMUSG00000021069	199.626	153.96	245.291	1.59321	0.671934	0.428702	1	Pygl
ENSMUSG00000089555	5.28749	4.07964	6.49534	1.59214	0.670964	0.532713	1
ENSMUSG00000029408	232.264	179.246	285.282	1.59157	0.670447	0.064377	1	Abcb9
ENSMUSG00000082322	3.45044	2.66308	4.23781	1.59132	0.670224	0.601931	1
ENSMUSG00000035561	289.467	223.475	355.46	1.5906	0.669575	0.0559723	1	Aldh1b1
ENSMUSG00000060445	22.6495	17.4987	27.8002	1.5887	0.667847	0.167183	1	Sycp2
ENSMUSG00000003227	13.5132	10.4402	16.5862	1.58868	0.667831	0.290079	1	Edar
ENSMUSG00000087467	0.926438	0.715772	1.1371	1.58864	0.66779	0.932582	1
ENSMUSG00000087926	0.926438	0.715772	1.1371	1.58864	0.66779	0.932582	1
ENSMUSG00000081640	1.4927	1.1534	1.832	1.58835	0.667529	0.82547	1
ENSMUSG00000047428	1.92457	1.4872	2.36194	1.58818	0.667374	0.756635	1	Dlk2
ENSMUSG00000025727	2.49083	1.92483	3.05684	1.58811	0.667312	0.691193	1	A930017K11Rik
ENSMUSG00000026955	13.6235	10.5292	16.7178	1.58776	0.666991	0.250656	1	Sapcd2
ENSMUSG00000082666	0.998134	0.771429	1.22484	1.58775	0.666987	0.925446	1
ENSMUSG00000032363	408.968	316.241	501.695	1.58643	0.665788	0.0706272	1	Adamts7
ENSMUSG00000053214	46.6963	36.1093	57.2833	1.58638	0.665742	0.200437	1
ENSMUSG00000021768	3.48633	2.69625	4.27641	1.58606	0.665445	0.59963	1	Dusp13
ENSMUSG00000079071	42.6493	32.9954	52.3032	1.58517	0.664637	0.51466	1	Gm14085
ENSMUSG00000030510	5.22966	4.04646	6.41286	1.58481	0.664308	0.535469	1	Cers3
ENSMUSG00000015980	126.911	98.202	155.621	1.5847	0.664207	0.119538	1	Lrrc27
ENSMUSG00000042797	9.47993	7.33968	11.6202	1.5832	0.662844	0.389125	1	Aqp11
ENSMUSG00000037977	106.762	82.6621	130.861	1.58309	0.662742	0.0494406	1	6430571L13Rik
ENSMUSG00000056856	2.85476	2.21047	3.49904	1.58294	0.66261	0.651453	1	Jakmip3
ENSMUSG00000082413	1.42738	1.10523	1.74952	1.58294	0.66261	0.831767	1
ENSMUSG00000083411	1.42738	1.10523	1.74952	1.58294	0.66261	0.831767	1
ENSMUSG00000089313	5.29741	4.10211	6.49271	1.58277	0.662453	0.484257	1
ENSMUSG00000075225	2.90668	2.25114	3.56222	1.58241	0.662121	0.647632	1	Ccdc162
ENSMUSG00000068221	12.2883	9.51697	15.0596	1.58239	0.662108	0.314798	1	Pdxp
ENSMUSG00000054206	83.9395	65.024	102.855	1.5818	0.661568	0.0533098	1	Gzmm
ENSMUSG00000048895	33.2578	25.765	40.7505	1.58162	0.661406	0.12362	1	Cdk5r1
ENSMUSG00000026424	8.56932	6.63889	10.4998	1.58155	0.661341	0.552478	1	Gpr37l1
ENSMUSG00000049526	4.52375	3.50501	5.54249	1.5813	0.661115	0.577656	1	Tmem202
ENSMUSG00000033615	0.995503	0.771429	1.21958	1.58093	0.660777	0.925696	1	Cplx1
ENSMUSG00000052951	0.995503	0.771429	1.21958	1.58093	0.660777	0.925696	1
ENSMUSG00000084160	0.995503	0.771429	1.21958	1.58093	0.660777	0.925696	1
ENSMUSG00000030088	83.4549	64.6891	102.221	1.58018	0.660092	0.0522778	1	Aldh1l1
ENSMUSG00000037106	24.8547	19.2674	30.442	1.57998	0.659903	0.143845	1	Fer1l6
ENSMUSG00000088632	2.86113	2.21796	3.50431	1.57997	0.659896	0.650978	1
ENSMUSG00000068638	29.8449	23.1359	36.554	1.57997	0.659893	0.161675	1
ENSMUSG00000051149	8.27683	6.41627	10.1374	1.57995	0.659882	0.430085	1	Adnp
ENSMUSG00000019301	5.28138	4.09462	6.46815	1.57967	0.659622	0.485032	1	Hsd17b1
ENSMUSG00000080759	3.27191	2.53678	4.00705	1.57958	0.659544	0.683545	1
ENSMUSG00000026162	50.3048	39.0096	61.6	1.5791	0.659102	0.0765159	1	Nhej1
ENSMUSG00000032105	93.8752	72.7969	114.953	1.5791	0.659101	0.0491435	1	Pdzd3
ENSMUSG00000087785	2.96497	2.2993	3.63065	1.57902	0.659033	0.643453	1
ENSMUSG00000017778	64.339	49.9022	78.7759	1.57861	0.65865	0.0770388	1	Cox7c
ENSMUSG00000029055	1.42475	1.10523	1.74426	1.57818	0.658265	0.832029	1	Plch2
ENSMUSG00000061013	4.1304	3.20439	5.05642	1.57797	0.658067	0.607212	1	Mkx
ENSMUSG00000033268	33.2623	25.8057	40.7189	1.57791	0.658011	0.112879	1	Duox1
ENSMUSG00000085772	9.20945	7.14703	11.2719	1.57714	0.657313	0.368528	1	D630024D03Rik
ENSMUSG00000077704	3.13227	2.43296	3.83158	1.57486	0.655228	0.69277	1	Snord89
ENSMUSG00000090293	2.34416	1.82101	2.86732	1.57458	0.654969	0.702985	1
ENSMUSG00000097193	3.63321	2.82242	4.444	1.57454	0.654926	0.646995	1
ENSMUSG00000025905	0.50094	0.389461	0.612419	1.57248	0.653041	1	1	Oprk1
ENSMUSG00000026368	0.50094	0.389461	0.612419	1.57248	0.653041	1	1	F13b
ENSMUSG00000026450	0.50094	0.389461	0.612419	1.57248	0.653041	1	1	Chit1
ENSMUSG00000034098	0.50094	0.389461	0.612419	1.57248	0.653041	1	1	Fstl5
ENSMUSG00000044407	0.50094	0.389461	0.612419	1.57248	0.653041	1	1	LOC101055707
ENSMUSG00000044933	0.50094	0.389461	0.612419	1.57248	0.653041	1	1	Sstr3
ENSMUSG00000058101	0.50094	0.389461	0.612419	1.57248	0.653041	1	1
ENSMUSG00000059455	0.50094	0.389461	0.612419	1.57248	0.653041	1	1	Plac8l1
ENSMUSG00000064530	0.50094	0.389461	0.612419	1.57248	0.653041	1	1
ENSMUSG00000073430	0.50094	0.389461	0.612419	1.57248	0.653041	1	1
ENSMUSG00000077542	0.50094	0.389461	0.612419	1.57248	0.653041	1	1
ENSMUSG00000078173	0.50094	0.389461	0.612419	1.57248	0.653041	1	1	Lenep
ENSMUSG00000079383	0.50094	0.389461	0.612419	1.57248	0.653041	1	1	Gm3095
ENSMUSG00000085684	0.50094	0.389461	0.612419	1.57248	0.653041	1	1
ENSMUSG00000088451	0.50094	0.389461	0.612419	1.57248	0.653041	1	1
ENSMUSG00000089622	0.50094	0.389461	0.612419	1.57248	0.653041	1	1
ENSMUSG00000089945	1.00188	0.778922	1.22484	1.57248	0.653041	0.925091	1	Akap2
ENSMUSG00000092781	0.50094	0.389461	0.612419	1.57248	0.653041	1	1
ENSMUSG00000095024	0.50094	0.389461	0.612419	1.57248	0.653041	1	1	Gm5458
ENSMUSG00000095343	0.50094	0.389461	0.612419	1.57248	0.653041	1	1
ENSMUSG00000097279	1.00188	0.778922	1.22484	1.57248	0.653041	0.925091	1
ENSMUSG00000097535	0.50094	0.389461	0.612419	1.57248	0.653041	1	1	LOC101055759
ENSMUSG00000089139	1.93206	1.50219	2.36194	1.57234	0.652909	0.755966	1
ENSMUSG00000081835	1.43112	1.11273	1.74952	1.57228	0.652862	0.831396	1
ENSMUSG00000044276	0.930184	0.723265	1.1371	1.57218	0.652766	0.932192	1	4933427E11Rik
ENSMUSG00000068086	0.930184	0.723265	1.1371	1.57218	0.652766	0.932192	1	Cyp2d9
ENSMUSG00000067242	68.3121	53.1342	83.49	1.57131	0.651964	0.304754	1	Lgi1
ENSMUSG00000000247	0.982105	0.763936	1.20027	1.57117	0.651841	0.926985	1	Lhx2
ENSMUSG00000032191	0.982105	0.763936	1.20027	1.57117	0.651841	0.926985	1	Bcl2l10
ENSMUSG00000047443	3.90396	3.03755	4.77038	1.57047	0.651194	0.671421	1	Fam132b
ENSMUSG00000084616	1.77659	1.38338	2.16979	1.56847	0.649358	0.874089	1
ENSMUSG00000032590	420.72	327.709	513.731	1.56765	0.6486	0.0261402	1	Apeh
ENSMUSG00000005628	177.65	138.397	216.903	1.56726	0.648242	0.124468	1	Tmod4
ENSMUSG00000002769	13.4232	10.4629	16.3836	1.56588	0.646973	0.272312	1	Gnmt
ENSMUSG00000021448	24.2135	18.8747	29.5523	1.56571	0.646817	0.164689	1	Shc3
ENSMUSG00000029149	17.5845	13.7079	21.461	1.56559	0.64671	0.227406	1	Krtcap3
ENSMUSG00000087331	19.7237	15.3771	24.0704	1.56534	0.646479	0.20298	1	1810021B22Rik
ENSMUSG00000058046	4.60941	3.59385	5.62497	1.56517	0.646316	0.572993	1	4933430I17Rik
ENSMUSG00000091712	40.4679	31.5588	49.3771	1.56461	0.645801	0.0998452	1	Sec14l5
ENSMUSG00000059864	4.26901	3.33069	5.20733	1.56344	0.644723	0.599402	1	Olfr1393
ENSMUSG00000071102	2.90452	2.26612	3.54291	1.56342	0.64471	0.647789	1
ENSMUSG00000095472	2.40489	1.87666	2.93312	1.56294	0.644267	0.797797	1	Snord88a
ENSMUSG00000087685	1.48679	1.16089	1.81269	1.56147	0.642904	0.826024	1
ENSMUSG00000086448	25.9699	20.2835	31.6563	1.56069	0.642186	0.189173	1
ENSMUSG00000091723	3.19543	2.49611	3.89475	1.56033	0.641851	0.688529	1
ENSMUSG00000067235	3.46113	2.70375	4.2185	1.56024	0.641771	0.601242	1	H2-Q10
ENSMUSG00000081278	10.6236	8.30042	12.9468	1.55978	0.641339	0.409332	1
ENSMUSG00000041012	86.6085	67.6754	105.542	1.55953	0.641108	0.124126	1	Cmtm8
ENSMUSG00000086741	11.5605	9.03452	14.0865	1.55919	0.640798	0.308513	1	Gm15816
ENSMUSG00000068079	101.353	79.2094	123.496	1.5591	0.640717	0.0551892	1	Tcf15
ENSMUSG00000053963	58.6104	45.8124	71.4083	1.55871	0.640354	0.363267	1	6330403A02Rik
ENSMUSG00000081692	24.6644	19.279	30.0498	1.55868	0.640324	0.171245	1
ENSMUSG00000032062	80.0618	62.5969	97.5266	1.55801	0.639705	0.0689748	1	2310030G06Rik
ENSMUSG00000089493	3.80396	2.9744	4.63351	1.5578	0.639507	0.636656	1
ENSMUSG00000058740	8.15375	6.37894	9.92857	1.55646	0.638271	0.436669	1	Kcnt1
ENSMUSG00000081447	0.985852	0.771429	1.20027	1.55591	0.637759	0.926622	1
ENSMUSG00000085051	0.985852	0.771429	1.20027	1.55591	0.637759	0.926622	1
ENSMUSG00000029660	1.27939	1.00141	1.55737	1.55518	0.637077	0.971937	1	Tex26
ENSMUSG00000072688	1.42147	1.11273	1.73022	1.55494	0.636856	0.832355	1
ENSMUSG00000088157	1.47339	1.1534	1.79339	1.55488	0.636801	0.827293	1
ENSMUSG00000082515	11.4442	8.96067	13.9277	1.55432	0.636282	0.334336	1
ENSMUSG00000087326	3.8794	3.03755	4.72125	1.55429	0.636259	0.632294	1
ENSMUSG00000083156	1.98885	1.55784	2.41985	1.55333	0.635368	0.756366	1
ENSMUSG00000074529	4.25784	3.33818	5.1775	1.551	0.633194	0.618481	1
ENSMUSG00000057722	166.583	130.607	202.56	1.55092	0.633124	0.0498739	1	Lepr
ENSMUSG00000087481	4.95646	3.88698	6.02594	1.55029	0.632535	0.6013	1
ENSMUSG00000085891	2.75653	2.1623	3.35076	1.54963	0.631921	0.736964	1	Gm14634
ENSMUSG00000090733	9.87167	7.74413	11.9992	1.54946	0.631767	0.376786	1	Rps27rt
ENSMUSG00000060429	280.111	219.756	340.465	1.54929	0.631603	0.129312	1	Sntb1
ENSMUSG00000001014	3.60668	2.82991	4.38345	1.54897	0.631311	0.717778	1	Icam4
ENSMUSG00000096549	11.887	9.32765	14.4463	1.54876	0.63111	0.347365	1	Prickle4
ENSMUSG00000063253	169.406	132.941	205.871	1.54859	0.630953	0.0513589	1	Scoc
ENSMUSG00000097699	2.8256	2.21796	3.43324	1.54793	0.630337	0.732229	1
ENSMUSG00000097820	47.503	37.3033	57.7027	1.54685	0.629336	0.0907769	1
ENSMUSG00000023795	54.331	42.6706	65.9914	1.54653	0.629034	0.110774	1
ENSMUSG00000003949	220.382	173.085	267.68	1.54652	0.629029	0.0584807	1	Hlf
ENSMUSG00000087535	9.28301	7.29152	11.2745	1.54625	0.628773	0.394953	1
ENSMUSG00000028175	9.77693	7.68098	11.8729	1.54575	0.628308	0.379471	1	Depdc1a
ENSMUSG00000022425	173.049	135.985	210.113	1.54512	0.627722	0.226915	1	Enpp2
ENSMUSG00000057246	2.30751	1.81351	2.80152	1.5448	0.627421	0.795525	1	BC051142
ENSMUSG00000064202	113.059	88.879	137.238	1.5441	0.626768	0.0944402	1	4430402I18Rik
ENSMUSG00000093658	2.7405	2.15481	3.3262	1.54362	0.626314	0.738086	1
ENSMUSG00000028832	45.5764	35.8394	55.3135	1.54337	0.626086	0.119748	1	Stmn1
ENSMUSG00000046480	1397.32	1098.91	1695.73	1.5431	0.625836	0.149253	1	Scn4b
ENSMUSG00000001864	40.9161	32.1964	49.6359	1.54166	0.624485	0.121201	1	Aif1l
ENSMUSG00000097149	2.60612	2.05099	3.16125	1.54133	0.624174	0.747852	1
ENSMUSG00000081308	8.54794	6.72773	10.3682	1.54111	0.623969	0.389081	1
ENSMUSG00000021032	0.989598	0.778922	1.20027	1.54094	0.623814	0.926262	1	Ngb
ENSMUSG00000047631	0.989598	0.778922	1.20027	1.54094	0.623814	0.926262	1	Apof
ENSMUSG00000039457	52.7346	41.5247	63.9444	1.53991	0.622848	0.30151	1	Ppl
ENSMUSG00000068740	94.5712	74.4706	114.672	1.53983	0.622767	0.0549079	1	Celsr2
ENSMUSG00000001504	67.6404	53.2699	82.0109	1.53953	0.622494	0.224064	1	Irx2
ENSMUSG00000028794	7.86464	6.19378	9.5355	1.53953	0.62249	0.446537	1	A3galt2
ENSMUSG00000044948	4.67576	3.68268	5.66884	1.53932	0.622296	0.569467	1	Cfap43
ENSMUSG00000032315	0.484911	0.381968	0.587855	1.53902	0.622009	1	1	Cyp1a1
ENSMUSG00000032454	0.484911	0.381968	0.587855	1.53902	0.622009	1	1	Rbp2
ENSMUSG00000079051	0.484911	0.381968	0.587855	1.53902	0.622009	1	1	Gm14025
ENSMUSG00000080839	0.484911	0.381968	0.587855	1.53902	0.622009	1	1
ENSMUSG00000082568	0.484911	0.381968	0.587855	1.53902	0.622009	1	1
ENSMUSG00000082724	0.484911	0.381968	0.587855	1.53902	0.622009	1	1
ENSMUSG00000083120	0.484911	0.381968	0.587855	1.53902	0.622009	1	1
ENSMUSG00000086144	0.484911	0.381968	0.587855	1.53902	0.622009	1	1
ENSMUSG00000086340	0.484911	0.381968	0.587855	1.53902	0.622009	1	1
ENSMUSG00000085881	10.5973	8.34872	12.8459	1.53867	0.621683	0.330826	1
ENSMUSG00000035686	245.275	193.232	297.318	1.53866	0.621672	0.312568	1	Thrsp
ENSMUSG00000050765	1.34144	1.05707	1.62581	1.53803	0.621084	0.967549	1
ENSMUSG00000074862	37.4509	29.5257	45.3762	1.53684	0.619964	0.141014	1	BC025920
ENSMUSG00000065591	1.75465	1.38338	2.12592	1.53676	0.619892	0.875795	1
ENSMUSG00000022041	19.3364	15.2508	23.422	1.53579	0.618982	0.22002	1	Chr2
ENSMUSG00000084572	4.33404	3.41952	5.24857	1.53488	0.61813	0.538712	1
ENSMUSG00000061414	36.2896	28.6322	43.9469	1.53487	0.618119	0.152831	1	Cracr2a
ENSMUSG00000039347	209.487	165.307	253.667	1.53452	0.617786	0.202762	1	Atp6v0e2
ENSMUSG00000087700	6.00491	4.73975	7.27008	1.53385	0.61716	0.536368	1
ENSMUSG00000097383	24.6122	19.4308	29.7936	1.53332	0.616662	0.232988	1
ENSMUSG00000030235	10.834	8.55623	13.1118	1.53242	0.615815	0.349723	1	Slco1c1
ENSMUSG00000027977	9.28404	7.33219	11.2359	1.53241	0.6158	0.394922	1	Ndst3
ENSMUSG00000088699	2.17425	1.71719	2.6313	1.53234	0.615732	0.80559	1
ENSMUSG00000080454	0.9762	0.771429	1.18097	1.53089	0.614369	0.927559	1
ENSMUSG00000081614	0.9762	0.771429	1.18097	1.53089	0.614369	0.927559	1
ENSMUSG00000090551	0.9762	0.771429	1.18097	1.53089	0.614369	0.927559	1
ENSMUSG00000096802	0.9762	0.771429	1.18097	1.53089	0.614369	0.927559	1
ENSMUSG00000056735	12.0009	9.48366	14.5182	1.53087	0.61435	0.391229	1	A930024E05Rik
ENSMUSG00000030159	6.93932	5.4855	8.39314	1.53006	0.613588	0.487432	1	Clec1b
ENSMUSG00000024112	108.216	85.5524	130.879	1.52981	0.613352	0.423609	1	Cac1h
ENSMUSG00000051548	5.74941	4.54723	6.95159	1.52875	0.612354	0.506515	1
ENSMUSG00000087611	26.4845	20.9468	32.0222	1.52873	0.612338	0.501886	1
ENSMUSG00000038496	29.8684	23.625	36.1118	1.52854	0.612152	0.182225	1	Slc19a3
ENSMUSG00000030747	2893.18	2288.66	3497.69	1.52827	0.611898	0.132813	1	Dgat2
ENSMUSG00000057818	2.60153	2.05848	3.14457	1.52762	0.611282	0.837955	1	1600029O15Rik
ENSMUSG00000066690	20.9265	16.5603	25.2926	1.5273	0.610986	0.25292	1
ENSMUSG00000032889	17.4109	13.7784	21.0434	1.52727	0.610956	0.291023	1
ENSMUSG00000090118	7.18372	5.68564	8.68181	1.52697	0.610672	0.439265	1
ENSMUSG00000001027	674.979	534.224	815.734	1.52695	0.610656	0.0830322	1	Scn4a
ENSMUSG00000022546	392.245	310.653	473.837	1.52529	0.609087	0.162458	1	Gpt
ENSMUSG00000085408	39.7032	31.4472	47.9592	1.52507	0.608878	0.246994	1	C530005A16Rik
ENSMUSG00000090881	2.5989	2.05848	3.13931	1.52506	0.608866	0.835141	1	Gm6904
ENSMUSG00000097007	10.0652	7.97411	12.1563	1.52447	0.608307	0.398302	1
ENSMUSG00000037129	56.5244	44.7929	68.2559	1.52381	0.607683	0.414763	1	Tmprss13
ENSMUSG00000079410	3.75307	2.9744	4.53173	1.52358	0.607464	0.639668	1	Gm2897
ENSMUSG00000089804	1.95615	1.55035	2.36194	1.52349	0.607379	0.753842	1
ENSMUSG00000097350	123.322	97.7495	148.894	1.52322	0.607121	0.0623316	1	4732491K20Rik
ENSMUSG00000050777	54.9674	43.5722	66.3625	1.52305	0.606959	0.339618	1	Tmem37
ENSMUSG00000097572	5.08485	4.03147	6.13824	1.52258	0.606518	0.59497	1
ENSMUSG00000097385	41.2075	32.6756	49.7394	1.52222	0.606174	0.141062	1
ENSMUSG00000041986	2.65588	2.10665	3.20512	1.52143	0.605429	0.744159	1	Elmod1
ENSMUSG00000079311	8.34775	6.62391	10.0716	1.52049	0.604538	0.46232	1
ENSMUSG00000028838	471.902	374.782	569.021	1.51827	0.60243	0.171737	1	Extl1
ENSMUSG00000022818	5.03405	3.9983	6.0698	1.5181	0.602265	0.597447	1	Cyp2ab1
ENSMUSG00000055301	0.840498	0.667609	1.01339	1.51793	0.602109	1	1	Adh7
ENSMUSG00000067219	0.840498	0.667609	1.01339	1.51793	0.602109	1	1	Nipal1
ENSMUSG00000097271	32.509	25.8248	39.1932	1.51765	0.601844	0.174828	1
ENSMUSG00000071793	13.5514	10.7667	16.3362	1.51729	0.601496	0.308938	1	2610005L07Rik
ENSMUSG00000021539	1.26009	1.00141	1.51877	1.51662	0.600862	0.973358	1	Lect2
ENSMUSG00000086555	1.26009	1.00141	1.51877	1.51662	0.600862	0.973358	1
ENSMUSG00000039488	31.2181	24.8118	37.6244	1.51639	0.600643	0.257387	1	Cntn5
ENSMUSG00000049588	156.964	124.761	189.167	1.51623	0.60049	0.0659012	1	Ccdc69
ENSMUSG00000082093	0.979946	0.778922	1.18097	1.51616	0.600423	0.927194	1
ENSMUSG00000095195	0.979946	0.778922	1.18097	1.51616	0.600423	0.927194	1
ENSMUSG00000065573	1.67968	1.33522	2.02415	1.51597	0.600239	0.881842	1
ENSMUSG00000072902	676.388	537.918	814.859	1.51484	0.599164	0.142017	1
ENSMUSG00000086487	1.74875	1.39087	2.10662	1.5146	0.598939	0.876259	1
ENSMUSG00000031700	521.901	415.125	628.676	1.51442	0.598769	0.0343612	1	Gpt2
ENSMUSG00000042377	6.70838	5.33685	8.07991	1.51398	0.59835	0.459621	1	Fam83g
ENSMUSG00000038077	30.2173	24.0413	36.3934	1.51379	0.598162	0.3752	1	Kc6
ENSMUSG00000046093	0.960171	0.763936	1.15641	1.51375	0.598126	0.929142	1	Hpcal4
ENSMUSG00000077565	6.45608	5.13671	7.77546	1.51371	0.598084	0.511458	1
ENSMUSG00000056203	4.64641	3.69767	5.59514	1.51316	0.59756	0.584454	1	Tas2r135
ENSMUSG00000025983	5.33544	4.24661	6.42428	1.5128	0.597224	0.482434	1	Ccdc150
ENSMUSG00000086920	6.58345	5.24053	7.92637	1.51251	0.596948	0.506273	1
ENSMUSG00000080547	5.0827	4.04646	6.11893	1.51217	0.59662	0.595075	1
ENSMUSG00000032985	3.79645	3.02257	4.57034	1.51207	0.596528	0.637097	1
ENSMUSG00000021604	619.084	492.946	745.222	1.51177	0.59624	0.054706	1	Irx4
ENSMUSG00000073274	152.178	121.227	183.129	1.51062	0.595145	0.217766	1
ENSMUSG00000049001	172.911	137.748	208.073	1.51053	0.595055	0.403247	1	Ndnf
ENSMUSG00000061991	3.98045	3.17121	4.78969	1.51037	0.594899	0.708167	1	Hist1h2af
ENSMUSG00000089512	1.87611	1.49469	2.25753	1.51036	0.594894	0.866675	1
ENSMUSG00000093445	3.77069	3.00437	4.537	1.51013	0.594672	0.638619	1	Lrch4
ENSMUSG00000051590	2.6436	2.10665	3.18055	1.50977	0.594329	0.745062	1	Map3k19
ENSMUSG00000022032	372.588	296.951	448.225	1.50942	0.593998	0.0986497	1	Scara5
ENSMUSG00000026686	0.488658	0.389461	0.587855	1.50941	0.593982	1	1	Lmx1a
ENSMUSG00000036110	0.488658	0.389461	0.587855	1.50941	0.593982	1	1	Slc17a2
ENSMUSG00000052974	0.977316	0.778922	1.17571	1.50941	0.593982	0.935439	1	Cyp2f2
ENSMUSG00000057657	0.488658	0.389461	0.587855	1.50941	0.593982	1	1
ENSMUSG00000081455	0.488658	0.389461	0.587855	1.50941	0.593982	1	1
ENSMUSG00000081791	0.488658	0.389461	0.587855	1.50941	0.593982	1	1
ENSMUSG00000084272	0.488658	0.389461	0.587855	1.50941	0.593982	1	1
ENSMUSG00000090216	0.488658	0.389461	0.587855	1.50941	0.593982	1	1
ENSMUSG00000097175	0.488658	0.389461	0.587855	1.50941	0.593982	1	1
ENSMUSG00000097198	0.488658	0.389461	0.587855	1.50941	0.593982	1	1
ENSMUSG00000038550	41.848	33.3582	50.3378	1.50901	0.5936	0.327868	1	Ciart
ENSMUSG00000055567	3.74959	2.98939	4.5098	1.5086	0.593212	0.729095	1	Unc80
ENSMUSG00000081488	2.78173	2.21796	3.3455	1.50837	0.59299	0.735219	1
ENSMUSG00000097654	7.42618	5.92312	8.92923	1.50752	0.592178	0.504575	1
ENSMUSG00000052563	39.5663	31.5586	47.574	1.50748	0.592139	0.148676	1	D930048N14Rik
ENSMUSG00000037336	27.8634	22.2279	33.4989	1.50706	0.591741	0.248965	1	Mfsd2b
ENSMUSG00000020848	6.21926	4.96224	7.47627	1.50663	0.591326	0.566486	1	Doc2b
ENSMUSG00000065476	6.07987	4.85106	7.30869	1.50661	0.591311	0.533138	1	Mir30b
ENSMUSG00000061082	0.966548	0.771429	1.16167	1.50586	0.590592	0.928508	1	Plac1
ENSMUSG00000047976	65.7538	52.4834	79.0242	1.5057	0.590433	0.250822	1	Kc1
ENSMUSG00000049107	68.3721	54.5791	82.1652	1.50543	0.59018	0.1043	1	Ntf3
ENSMUSG00000085763	1.43543	1.1459	1.72496	1.50533	0.590076	0.830971	1	Smc2os
ENSMUSG00000097731	15.9858	12.762	19.2097	1.50522	0.589974	0.317477	1
ENSMUSG00000058441	4.75204	3.79399	5.71008	1.50503	0.589793	0.517499	1	Panx2
ENSMUSG00000087151	8.1561	6.51259	9.79961	1.50472	0.589491	0.46882	1
ENSMUSG00000079045	8.62242	6.8872	10.3576	1.5039	0.588705	0.420585	1	LOC102632463
ENSMUSG00000072572	9.41606	7.52163	11.3105	1.50373	0.588543	0.362395	1	Slc39a2
ENSMUSG00000032179	47.1211	37.6486	56.5936	1.50321	0.588043	0.137788	1	Bmp5
ENSMUSG00000038295	24.0215	19.1934	28.8496	1.5031	0.587938	0.239729	1	Atg9b
ENSMUSG00000063767	5.82056	4.65092	6.99019	1.50297	0.587817	0.593037	1	S100a7a
ENSMUSG00000093011	6.36751	5.08854	7.64648	1.50269	0.587544	0.560242	1	Mir100
ENSMUSG00000090099	1.93047	1.54286	2.31807	1.50245	0.587322	0.756109	1
ENSMUSG00000097787	54.7425	43.7569	65.7282	1.50212	0.587003	0.109772	1	2700046G09Rik
ENSMUSG00000094335	1.67003	1.33522	2.00484	1.50151	0.586414	0.884436	1
ENSMUSG00000003665	5.3902	4.30962	6.47077	1.50147	0.586377	0.623873	1	Has1
ENSMUSG00000090666	2.70301	2.1623	3.24372	1.50012	0.585082	0.740745	1
ENSMUSG00000085625	8.51662	6.81336	10.2199	1.49998	0.58494	0.422179	1
ENSMUSG00000030357	3482.02	2786.16	4177.89	1.49952	0.584496	0.0681584	1	Fkbp4
ENSMUSG00000084989	6.27985	5.02553	7.53418	1.49918	0.584176	0.549246	1	E030010N08Rik
ENSMUSG00000042115	669.981	536.175	803.788	1.49911	0.58411	0.0527213	1	Klhdc8a
ENSMUSG00000092841	0.963918	0.771429	1.15641	1.49905	0.584044	0.928769	1
ENSMUSG00000045875	429.435	343.87	515	1.49766	0.582708	0.11454	1	Adra1a
ENSMUSG00000060314	36.3016	29.0783	43.5248	1.49681	0.581896	0.187259	1	Zfp941
ENSMUSG00000067338	1.3195	1.05707	1.58194	1.49653	0.581622	0.96907	1	Tuba3b
ENSMUSG00000010021	5.55852	4.45411	6.66292	1.4959	0.581017	0.563553	1	Kif19a
ENSMUSG00000030413	2.34172	1.87666	2.80678	1.49562	0.580745	0.793065	1	Pglyrp1
ENSMUSG00000062391	11.7832	9.44646	14.1199	1.49473	0.579883	0.349801	1	4932435O22Rik
ENSMUSG00000086774	1.79476	1.43904	2.15049	1.49439	0.57956	0.872695	1
ENSMUSG00000084033	2.76506	2.21796	3.31216	1.49333	0.578538	0.736371	1
ENSMUSG00000020072	6.62008	5.31117	7.929	1.49289	0.57811	0.463134	1	Pbld1
ENSMUSG00000038984	271.872	218.125	325.62	1.49282	0.578036	0.0464657	1	Tspyl5
ENSMUSG00000065434	7.79751	6.25692	9.33809	1.49244	0.577674	0.485741	1
ENSMUSG00000090561	10.7221	8.60439	12.8398	1.49223	0.577474	0.406696	1
ENSMUSG00000024076	65.0606	52.213	77.9081	1.49212	0.577365	0.376533	1	Vit
ENSMUSG00000063415	52.6705	42.2776	63.0635	1.49165	0.576913	0.261533	1	Cyp26b1
ENSMUSG00000035805	0.970295	0.778922	1.16167	1.49138	0.576646	0.928138	1	Mlc1
ENSMUSG00000029847	4.34736	3.49003	5.2047	1.49131	0.576576	0.644111	1	2010107G12Rik
ENSMUSG00000031147	241.468	193.857	289.079	1.4912	0.576472	0.059618	1	Magix
ENSMUSG00000090108	9.70492	7.79229	11.6176	1.4909	0.576188	0.410645	1
ENSMUSG00000050266	1.79213	1.43904	2.14523	1.49074	0.576027	0.872896	1	Olfr690
ENSMUSG00000088171	1.44555	1.16089	1.73022	1.49042	0.575724	0.829978	1
ENSMUSG00000027690	5.49563	4.41344	6.57781	1.4904	0.575704	0.619083	1	Slc2a2
ENSMUSG00000017491	365.165	293.342	436.988	1.48969	0.575008	0.112484	1	Rarb
ENSMUSG00000097125	15.7735	12.6733	18.8736	1.48924	0.574574	0.303418	1
ENSMUSG00000040543	57.5107	46.2083	68.8131	1.48919	0.574532	0.149584	1	Pitpnm3
ENSMUSG00000097102	31.8965	25.6281	38.1649	1.48918	0.574516	0.390431	1	2310069G16Rik
ENSMUSG00000097789	5.43162	4.36528	6.49796	1.48856	0.573914	0.768032	1	Gm2115
ENSMUSG00000031845	0.47526	0.381968	0.568552	1.48848	0.57384	1	1	Bco1
ENSMUSG00000035560	0.47526	0.381968	0.568552	1.48848	0.57384	1	1	Wdr20rt
ENSMUSG00000040420	0.47526	0.381968	0.568552	1.48848	0.57384	1	1	Cdh18
ENSMUSG00000060777	0.47526	0.381968	0.568552	1.48848	0.57384	1	1
ENSMUSG00000060780	0.47526	0.381968	0.568552	1.48848	0.57384	1	1	Lrrtm1
ENSMUSG00000061802	0.47526	0.381968	0.568552	1.48848	0.57384	1	1	Armc4
ENSMUSG00000066176	0.47526	0.381968	0.568552	1.48848	0.57384	1	1
ENSMUSG00000068323	0.47526	0.381968	0.568552	1.48848	0.57384	1	1	Slc4a5
ENSMUSG00000079502	0.47526	0.381968	0.568552	1.48848	0.57384	1	1	1700101E01Rik
ENSMUSG00000080790	0.47526	0.381968	0.568552	1.48848	0.57384	1	1
ENSMUSG00000083903	0.47526	0.381968	0.568552	1.48848	0.57384	1	1
ENSMUSG00000092376	0.47526	0.381968	0.568552	1.48848	0.57384	1	1
ENSMUSG00000095615	0.47526	0.381968	0.568552	1.48848	0.57384	1	1
ENSMUSG00000097872	0.47526	0.381968	0.568552	1.48848	0.57384	1	1
ENSMUSG00000065409	3.71932	2.98939	4.44926	1.48835	0.573715	0.641697	1
ENSMUSG00000090230	4.26365	3.42701	5.10029	1.48826	0.573627	0.599697	1
ENSMUSG00000025588	9.51335	7.6478	11.3789	1.48787	0.573246	0.480907	1	t1
ENSMUSG00000029155	10.5741	8.50057	12.6476	1.48786	0.573235	0.382683	1	Spata18
ENSMUSG00000082884	4.61792	3.71265	5.52319	1.48767	0.573051	0.572536	1
ENSMUSG00000065468	3.10462	2.49611	3.71312	1.48757	0.572953	0.771654	1
ENSMUSG00000025464	9.24347	7.43267	11.0543	1.48725	0.572652	0.489274	1	Paox
ENSMUSG00000050852	35.9204	28.8846	42.9563	1.48717	0.57257	0.205277	1
ENSMUSG00000085069	93.0067	74.7925	111.221	1.48706	0.572464	0.0839508	1
ENSMUSG00000091994	61.5015	49.4573	73.5457	1.48705	0.572456	0.120584	1
ENSMUSG00000074414	2.27377	1.8285	2.71904	1.48703	0.572438	0.798	1
ENSMUSG00000020415	561.423	451.6	671.245	1.48637	0.571794	0.570424	1	Pttg1
ENSMUSG00000022219	27.5098	22.1305	32.8891	1.48614	0.571573	0.204293	1	Cideb
ENSMUSG00000064918	2.80733	2.25863	3.35602	1.48587	0.571305	0.733467	1
ENSMUSG00000032226	5.53526	4.45411	6.61642	1.48546	0.570913	0.627833	1	Gcnt3
ENSMUSG00000002500	1332.13	1072.15	1592.11	1.48498	0.570442	0.0523276	1	Rpl3l
ENSMUSG00000021185	604.152	486.303	722	1.48467	0.570143	0.0912974	1	9030617O03Rik
ENSMUSG00000073290	0.967664	0.778922	1.15641	1.48462	0.570098	0.928398	1
ENSMUSG00000017453	7.76349	6.24943	9.27755	1.48454	0.570018	0.52661	1	Pipox
ENSMUSG00000057103	18.9318	15.2399	22.6236	1.48449	0.56997	0.31369	1	Cml1
ENSMUSG00000024525	164.307	132.279	196.334	1.48424	0.569725	0.0772013	1	Impa2
ENSMUSG00000088302	11.5255	9.27949	13.7716	1.48409	0.569576	0.38129	1
ENSMUSG00000026523	1.30347	1.04958	1.55737	1.48381	0.569307	0.970202	1	Wdr64
ENSMUSG00000036131	12.5789	10.1289	15.0289	1.48376	0.569255	0.426527	1	Frmd7
ENSMUSG00000089292	9.61635	7.74413	11.4886	1.48352	0.569026	0.444444	1
ENSMUSG00000022442	237.333	191.139	283.528	1.48336	0.568868	0.0680026	1	Ttll1
ENSMUSG00000043719	293.668	236.535	350.8	1.48308	0.568596	0.157403	1	Col6a6
ENSMUSG00000085382	7.55103	6.08246	9.0196	1.48289	0.568408	0.534291	1
ENSMUSG00000087782	2.26037	1.82101	2.69974	1.48255	0.568084	0.798996	1
ENSMUSG00000058567	28.6856	23.1169	34.2543	1.48179	0.567336	0.213099	1
ENSMUSG00000078670	3008.9	2425.38	3592.42	1.48118	0.566747	0.0489122	1	Fam174b
ENSMUSG00000045318	3.82803	3.08572	4.57034	1.48113	0.566697	0.635251	1	Adra2c
ENSMUSG00000038298	1.36177	1.09774	1.62581	1.48105	0.566618	0.966167	1	Pdzk1
ENSMUSG00000045008	34.4829	27.8054	41.1603	1.4803	0.565886	0.193733	1	9030612E09Rik
ENSMUSG00000081584	48.1651	38.8417	57.4886	1.48007	0.565669	0.141178	1
ENSMUSG00000074527	3.21464	2.59243	3.83684	1.48001	0.565611	0.687262	1
ENSMUSG00000085171	51.3413	41.4063	61.2763	1.47988	0.565477	0.181339	1	D830026I12Rik
ENSMUSG00000055833	6.91091	5.57433	8.24749	1.47955	0.565157	0.488544	1	1700034H15Rik
ENSMUSG00000083757	4.06	3.27503	4.84497	1.47937	0.564978	0.673759	1
ENSMUSG00000026938	47.3601	38.2117	56.5085	1.47883	0.564453	0.235656	1	Fc
ENSMUSG00000087514	11.5327	9.30517	13.7602	1.47876	0.564391	0.408042	1
ENSMUSG00000074215	70.1522	56.6152	83.6893	1.47821	0.563853	0.109529	1
ENSMUSG00000083610	93.3367	75.326	111.347	1.4782	0.563846	0.104573	1
ENSMUSG00000062683	10.0178	8.08542	11.9501	1.47798	0.563627	0.429194	1	Atp5g2
ENSMUSG00000085214	3.35915	2.71124	4.00705	1.47794	0.563588	0.678053	1	0610005C13Rik
ENSMUSG00000026479	229.194	185.001	273.388	1.47777	0.563418	0.168694	1	Lamc2
ENSMUSG00000027171	40.5186	32.7077	48.3294	1.47762	0.56327	0.162032	1	Prrg4
ENSMUSG00000029384	1.78248	1.43904	2.12592	1.47732	0.562986	0.873635	1	2010109A12Rik
ENSMUSG00000007946	1.71342	1.38338	2.04345	1.47714	0.562808	0.879079	1	Phox2a
ENSMUSG00000066885	1.71342	1.38338	2.04345	1.47714	0.562808	0.879079	1
ENSMUSG00000023267	13.4313	10.8448	16.0177	1.47699	0.562659	0.332328	1	Gabrr2
ENSMUSG00000068854	157.872	127.482	188.262	1.47678	0.562453	0.0954285	1	Hist2h2be
ENSMUSG00000003934	721.303	582.557	860.048	1.47633	0.562017	0.232021	1	Efnb3
ENSMUSG00000086607	3.27844	2.64809	3.90879	1.47608	0.561771	0.753922	1	4930511M06Rik
ENSMUSG00000053030	3.37491	2.72609	4.02373	1.47601	0.561699	0.754592	1	Spink2
ENSMUSG00000006218	14.6315	11.8239	17.4391	1.4749	0.56062	0.568098	1	Fam131c
ENSMUSG00000087578	29.2177	23.6143	34.8211	1.47457	0.560299	0.208385	1	LOC102635447
ENSMUSG00000040111	750.757	606.903	894.611	1.47406	0.559795	0.100634	1	Gramd1b
ENSMUSG00000079508	71.0654	57.457	84.6737	1.47369	0.559431	0.126201	1	Apoo
ENSMUSG00000072066	5.21043	4.21329	6.20756	1.47333	0.559079	0.651894	1	6720489N17Rik
ENSMUSG00000021303	3.49964	2.82991	4.16937	1.47332	0.559074	0.724117	1	Gng4
ENSMUSG00000095040	1.78886	1.44653	2.13119	1.47331	0.559059	0.873146	1	1700001J03Rik
ENSMUSG00000065557	13.3694	10.8115	15.9273	1.47318	0.558935	0.401237	1	Mirlet7c-1
ENSMUSG00000006567	1.23816	1.00141	1.4749	1.47282	0.558578	0.975007	1	Atp7b
ENSMUSG00000044067	938.23	759.1	1117.36	1.47195	0.557732	0.190949	1	Gpr22
ENSMUSG00000089429	1.76908	1.43154	2.10662	1.47157	0.557358	0.87467	1
ENSMUSG00000096377	1.76908	1.43154	2.10662	1.47157	0.557358	0.87467	1
ENSMUSG00000053574	13.3491	10.8042	15.894	1.4711	0.556893	0.356323	1
ENSMUSG00000096952	45.5126	36.8365	54.1887	1.47106	0.556856	0.171895	1
ENSMUSG00000051107	214.303	173.462	255.144	1.4709	0.556695	0.114126	1
ENSMUSG00000039384	181.063	146.63	215.495	1.46965	0.55547	0.0741265	1	Dusp10
ENSMUSG00000083287	8.27539	6.70204	9.84873	1.46951	0.555337	0.464746	1
ENSMUSG00000045929	2.24809	1.82101	2.67517	1.46906	0.554897	0.799916	1
ENSMUSG00000038180	9.47268	7.67348	11.2719	1.46894	0.554773	0.482144	1	Spag4
ENSMUSG00000037140	2.70995	2.19548	3.22442	1.46866	0.554504	0.740249	1	Tas2r108
ENSMUSG00000040287	16.636	13.4779	19.794	1.46862	0.554463	0.30519	1	Stac3
ENSMUSG00000045573	34.9459	28.3174	41.5744	1.46816	0.554005	0.606061	1	Penk
ENSMUSG00000084230	34.296	27.7977	40.7944	1.46755	0.553407	0.201641	1
ENSMUSG00000035849	708.313	574.109	842.517	1.46752	0.553381	0.0541916	1	Krt222
ENSMUSG00000065715	4.15905	3.37136	4.94674	1.46729	0.55315	0.668356	1	Snord7
ENSMUSG00000090955	4.13114	3.34888	4.9134	1.46718	0.553044	0.66986	1
ENSMUSG00000059146	15.7954	12.8102	18.7806	1.46607	0.551951	0.340333	1	Ntrk3
ENSMUSG00000030431	16.6458	13.5003	19.7914	1.466	0.551881	0.36105	1	Tmem238
ENSMUSG00000026011	18.5632	15.0583	22.0682	1.46552	0.551413	0.317454	1	Ctla4
ENSMUSG00000029544	37.7808	30.6653	44.8962	1.46407	0.549985	0.170768	1	Cabp1
ENSMUSG00000096970	11.5655	9.38746	13.7435	1.46403	0.54994	0.431784	1
ENSMUSG00000003559	729.358	592.019	866.698	1.46397	0.549885	0.0538056	1	As3mt
ENSMUSG00000084202	1.77283	1.43904	2.10662	1.46391	0.549827	0.874379	1
ENSMUSG00000091166	9.40276	7.63281	11.1727	1.46377	0.549693	0.519906	1	Tstd1
ENSMUSG00000085433	29.6406	24.0627	35.2186	1.46362	0.549539	0.233592	1
ENSMUSG00000000142	77.0381	62.55	91.5261	1.46325	0.549175	0.130005	1	Axin2
ENSMUSG00000089908	6.28551	5.10353	7.46749	1.4632	0.549128	0.563668	1
ENSMUSG00000083827	57.6303	46.7986	68.4621	1.46291	0.548842	0.124599	1
ENSMUSG00000006235	23.9488	19.4491	28.4486	1.46272	0.548655	0.277999	1	Epor
ENSMUSG00000045545	4.22872	3.43437	5.02307	1.46259	0.548524	0.739911	1	Krt14
ENSMUSG00000067356	9.33876	7.58465	11.0929	1.46254	0.548479	0.486275	1
ENSMUSG00000030838	108.84	88.4076	129.273	1.46224	0.548183	0.13904	1	Ush1c
ENSMUSG00000097827	11.3041	9.18316	13.425	1.46191	0.547858	0.413891	1
ENSMUSG00000092181	8.95571	7.27653	10.6349	1.46153	0.547482	0.504299	1
ENSMUSG00000041782	68.3917	55.5789	81.2045	1.46107	0.547023	0.308879	1	Lad1
ENSMUSG00000097204	64.6245	52.5245	76.7245	1.46074	0.546698	0.153183	1
ENSMUSG00000000938	0.479006	0.389461	0.568552	1.45984	0.545812	1	1	Hoxa10
ENSMUSG00000030834	0.479006	0.389461	0.568552	1.45984	0.545812	1	1	Abcc6
ENSMUSG00000036800	0.958013	0.778922	1.1371	1.45984	0.545812	0.929357	1	Fam135b
ENSMUSG00000039257	0.479006	0.389461	0.568552	1.45984	0.545812	1	1	Vstm2b
ENSMUSG00000048022	0.479006	0.389461	0.568552	1.45984	0.545812	1	1	Tmem229a
ENSMUSG00000055403	0.479006	0.389461	0.568552	1.45984	0.545812	1	1	4933427D06Rik
ENSMUSG00000063830	0.479006	0.389461	0.568552	1.45984	0.545812	1	1
ENSMUSG00000064016	0.479006	0.389461	0.568552	1.45984	0.545812	1	1	Gm648
ENSMUSG00000065346	0.479006	0.389461	0.568552	1.45984	0.545812	1	1
ENSMUSG00000078591	0.479006	0.389461	0.568552	1.45984	0.545812	1	1	Hs3st4
[truncated: 19,051 more rows]
