# Supplementary material for: Cardiomyocytes stimulate angiogenesis after ischemic injury in a ZEB2-dependent manner
Source: Nat Commun. 2021 Jan 4;12:84. doi: 10.1038/s41467-020-20361-3 (PMC7782784; doi:10.1038/s41467-020-20361-3)
Supplement: Supplementary file 7 — Supplementary Data 4 [file 41467_2020_20361_MOESM7_ESM.xlsx]

## Sheet: prot id mass spec .txt
iBAQ	iBAQ April	iBAQ May	iBAQ October	Protein IDs	Majority protein IDs	Protein names	Gene names	Classification	Mol. weight [kDa]	Q-value	Score	LFQ intensity April	LFQ intensity May	LFQ intensity October	MS/MS Count	MS/MS Count April	MS/MS Count May	MS/MS Count October	Peptides April	Peptides May	Peptides October	Razor + unique peptides April	Razor + unique peptides May	Razor + unique peptides October	Unique peptides April	Unique peptides May	Unique peptides October	Sequence coverage April [%]	Sequence coverage May [%]	Sequence coverage October [%]	Intensity April	Intensity May	Intensity October
2810900000	0	0	2810900000	G5BPU6	G5BPU6		Bcl2-like	membrane protein	15.965	0	11.74	0	0	1229200000	16	0	0	16	0	0	2	0	0	2	0	0	2	0	0	6.2	0	0	25298000000
2209300000	36783000	134410000	2038100000	P06302;Q63453;Q63452;G5BKX6;A0A0N8EUD3	P06302	Prothymosin alpha;Prothymosin alpha, N-terminally processed;Thymosin alpha	Ptma	plasma protein	12.382	0	323.31	144100000	208630000	478130000	82	13	47	22	5	8	5	5	8	5	5	8	5	25.9	32.1	30.4	110350000	403230000	6114200000
441000000	0	0	441000000	Q62587;A0ELY5;A0ELY2;P01322	Q62587;A0ELY5;A0ELY2;P01322	Insulin-1;Insulin-1 B chain;Insulin-1 A chain	Ins1	plasma protein	12.324	0	7.3307	0	0	150820000	0	0	0	0	0	0	1	0	0	1	0	0	1	0	0	6.4	0	0	1764000000
432130000	0	0	432130000	G5BV27;G5BV24;G5BH20;G3V8B3;A0A091DUC9;A0A091DTR6;A0A091CLG6;A0A0G2JXI9;A0A091CID9;G5C991;A0A091EER6;G5BSE9;G3V9C7;A0A091DU07;M0RBQ5;G5C990;D3ZWM5;D3ZNZ9;D3ZLY9;A0A0P6J793;A0A091EES0;A0A091DS07;A0A091CQU2;A0A091CMI5;D3ZNH4;A0A091DTR8;A0A091D5R2;Q00715;G5BV35;A0A091DTE6;G5BSG5;G5BSF7;G5BSE7;D4A817;A0A091DNZ7;Q00729;Q9Z2R0;Q7M0A0;A0A0R3SFS0;G5BV36;A0A0N4YM54;A0A0N4YI58;A0A0K0DRK5;A0A0K0DRB8;A0A0K0D…	G5BV27;G5BV24;G5BH20;G3V8B3;A0A091DUC9;A0A091DTR6;A0A091CLG6;A0A0G2JXI9;A0A091CID9;G5C991;A0A091EER6;G5BSE9;G3V9C7;A0A091DU07;M0RBQ5;G5C990;D3ZWM5;D3ZNZ9;D3ZLY9;A0A0P6J793;A0A091EES0;A0A091DS07;A0A091CQU2;A0A091CMI5;D3ZNH4;A0A091DTR8;A0A091D5R2;Q00715;G5BV35;A0A091DTE6;G5BSG5;G5BSF7;G5BSE7;D4A817;A0A091DNZ7;Q00729	Histone H2B;Histone H2B type 1;Histone H2B type 1-A	LOC100910200;Hist1h2bk;Hist3h2bb;Hist1h2bb;Hist3h2ba;Hist1h2bl;Hist1h2bo;LOC100912338;Hist1h2ba		13.906	0	16.1	0	0	274850000	9	0	0	9	0	0	4	0	0	1	0	0	1	0	0	34.9	0	0	3024900000
243620000	59034	0	243560000	A0A0G2K654	A0A0G2K654		Hist1h1c		21.316	0	109.46	0	0	176280000	44	0	0	44	1	0	8	1	0	8	0	0	4	5.7	0	26.4	531310	0	2192100000
204850000	0	0	204850000	B6ID08;P04355;D3ZHV3;G5CB62	B6ID08;P04355;D3ZHV3	Metallothionein;Metallothionein-2	Mt2A;Mt2;Mt1m	plasma protein	6.1453	0	323.31	0	0	49311000	28	0	0	28	0	0	6	0	0	6	0	0	4	0	0	91.8	0	0	614560000
146670000	0	0	146670000	B3DM95;P04550	B3DM95;P04550	Parathymosin	Ptms	intracellular	11.559	0	216.39	0	0	34873000	4	0	0	4	0	0	3	0	0	3	0	0	3	0	0	16.7	0	0	440020000
136410000	0	0	136410000	Q7M079	Q7M079		Hsp90b1		1.978	0	266.54	0	0	11640000	10	0	0	10	0	0	2	0	0	2	0	0	2	0	0	100	0	0	136410000
132480000	0	0	132480000	G5BRQ3;P63312	G5BRQ3;P63312	Thymosin beta-10	Tmsb10	plasma protein	5.0256	0	63.047	0	0	21077000	4	0	0	4	0	0	2	0	0	2	0	0	2	0	0	36.4	0	0	264950000
99731000	0	134140	99597000	B0K031;Q7TP62;P05426	B0K031;Q7TP62;P05426	60S ribosomal protein L7	Rpl7;LOC367195		30.313	0	36.554	0	0	78739000	40	0	3	37	0	1	6	0	1	6	0	1	6	0	3.1	7.7	0	1743800	1294800000
94354000	16767000	218800	77369000	P07632;Q6LDS4;Q6PEC5;D4PAS2;A0A0P6JIA7;G5BEA6;A0A091CV69	P07632;Q6LDS4;Q6PEC5	Superoxide dismutase [Cu-Zn]	Sod1	plasma protein	15.911	0	284.13	68896000	0	59154000	52	26	2	24	9	2	8	9	2	8	9	2	8	47.4	16.2	55.2	150900000	1969200	696320000
76132000	207500	0	75924000	M0R7B4	M0R7B4		LOC684828		22.233	0	196.45	0	0	61709000	15	0	0	15	2	0	7	1	0	3	1	0	3	14.5	0	21.4	2075000	0	759240000
74503000	0	581570	73922000	A0A0A7HRM6;P62329	A0A0A7HRM6;P62329	Thymosin beta-4;Hematopoietic system regulatory peptide	Tmsb4x	plasma protein	5.0526	0	156.59	0	0	8476400	10	0	1	9	0	1	2	0	1	2	0	1	2	0	31.8	31.8	0	1163100	147840000
67970000	0	0	67970000	D3ZFY8;A0A0P6JB48;G5BZH2;G5BHS8;A0A091DZI5;A0A091DHI9;A0A0G2JU07;G5AZ04;Q7M767	D3ZFY8;A0A0P6JB48;G5BZH2;G5BHS8;A0A091DZI5;A0A091DHI9;A0A0G2JU07;G5AZ04;Q7M767	Ubiquitin-conjugating enzyme E2 variant 2	LOC100912618;Ube2v2	intracellular	16.355	0	161.43	0	0	58181000	6	0	0	6	0	0	2	0	0	2	0	0	2	0	0	15	0	0	679700000
64076000	0	158300	63918000	A0A096MK73;G5C6L2;P13668;G5BQ54;A0A091E336;G5AUP9	A0A096MK73;G5C6L2;P13668	Stathmin	Stmn1	intracellular	14.637	0	118.43	0	0	43362000	15	0	2	13	0	1	4	0	1	4	0	1	4	0	9.5	20.6	0	1266400	511340000
62280000	0	0	62280000	P15865	P15865	Histone H1.4	Hist1h1e		21.987	0	36.51	0	0	45669000	12	0	0	12	1	0	7	0	0	3	0	0	3	5.5	0	25.6	0	0	560520000
58671000	0	0	58671000	A0A0U1RS43;Q99JC6;A0A023IM54	A0A0U1RS43;Q99JC6;A0A023IM54		Tapbp	plasma protein	6.3802	0	8.1717	0	0	14359000	6	0	0	6	0	0	1	0	0	1	0	0	1	0	0	21.7	0	0	176010000
57620000	0	0	57620000	G5C3G0;A0A0N8EUW0;G5C3F9;Q6MG61	G5C3G0;A0A0N8EUW0;G5C3F9;Q6MG61	Chloride intracellular channel protein 1	Clic1	plasma protein	26.318	0	32.549	0	0	72672000	6	0	0	6	0	0	2	0	0	2	0	0	2	0	0	12.8	0	0	864300000
51953000	0	0	51953000	G5ARV4;D3ZIE1;B2RYR8;Q6TXJ0;A0A091DDH8;P62243;M0R7Q5	G5ARV4;D3ZIE1;B2RYR8;Q6TXJ0;A0A091DDH8;P62243;M0R7Q5	40S ribosomal protein S8	RGD1566369;Rps8;LOC297756;LOC100363452		24.221	0	86.527	0	0	39219000	9	0	0	9	0	0	3	0	0	3	0	0	3	0	0	13.5	0	0	467580000
49757000	0	0	49757000	Q6PDV6;A0A0N8ESF7;A0A091DLN1;P13471;A0A0K0D0V2	Q6PDV6;A0A0N8ESF7;A0A091DLN1;P13471;A0A0K0D0V2	40S ribosomal protein S14	Rps14		16.273	0	81.386	0	0	15690000	13	0	0	13	0	0	4	0	0	4	0	0	4	0	0	19.9	0	0	199030000
49227000	0	0	49227000	G5BKL1;A0A0G2K7R1;Q9Z2Q9	G5BKL1;A0A0G2K7R1		Histone H2B		13.92	0	11.066	0	0	27083000	5	0	0	5	0	0	4	0	0	1	0	0	1	0	0	34.9	0	0	344590000
48209000	0	0	48209000	G5B0Z6	G5B0Z6		60S ribosomal protein L31		14.409	0	323.31	0	0	24304000	10	0	0	10	0	0	2	0	0	2	0	0	1	0	0	9.6	0	0	289250000
48078000	0	0	48078000	G5B063	G5B063	Sigma 1-type opioid receptor	Sigmar1	membrane protein	25.154	0	11.168	0	0	29342000	1	0	0	1	0	0	2	0	0	2	0	0	2	0	0	3.6	0	0	288470000
46670000	0	242890	46427000	Q05175	Q05175	Brain acid soluble protein 1	Basp1	plasma protein	21.79	0	223.84	0	0	38653000	33	0	3	30	0	2	7	0	2	7	0	2	2	0	10.9	51.8	0	2428900	464270000
46437000	0	0	46437000	A0A091DRZ3;G5BQE1;A0A0G2JXE0;A0A091DD47	A0A091DRZ3;G5BQE1;A0A0G2JXE0;A0A091DD47		Histone H3		30.687	0	29.869	0	0	52793000	13	0	0	13	0	0	5	0	0	5	0	0	1	0	0	19.3	0	0	650120000
40844000	0	0	40844000	F1M013;D4A6B9;D3ZU22;D3ZNA3;B0K021;A0A0P6K8Y4;A0A091CUY7;D3ZJH5;D3ZPL5;G5B8H0;A0A091CXZ6;P62425;F1M1M2;A0A091EPJ6;F1M4C7;F1M2Q3;M0R3M3	F1M013;D4A6B9;D3ZU22;D3ZNA3;B0K021;A0A0P6K8Y4;A0A091CUY7;D3ZJH5;D3ZPL5;G5B8H0;A0A091CXZ6;P62425;F1M1M2;A0A091EPJ6;F1M4C7;F1M2Q3	60S ribosomal protein L7a	LOC100910109;LOC680161;LOC100361311;LOC100911987;LOC100911966;RGD1562953;Rpl7a;RGD1563220;RGD1563045;RGD1564370		29.864	0	188.12	0	0	31213000	11	0	0	11	0	0	4	0	0	4	0	0	4	0	0	12.8	0	0	408440000
37701000	0	0	37701000	B2RZD1	B2RZD1		Sec61b	membrane protein	9.9884	0	302.06	0	0	18729000	12	0	0	12	0	0	2	0	0	2	0	0	2	0	0	19.8	0	0	226210000
36166000	0	0	36166000	A0A0G2K4Q1;A0A0H2UHJ3;P19944	A0A0G2K4Q1;A0A0H2UHJ3;P19944	60S acidic ribosomal protein P1	Rplp1		9.9151	0	15.247	0	0	6271800	6	0	0	6	0	0	2	0	0	2	0	0	2	0	0	18.3	0	0	108500000
34493000	0	0	34493000	G5BX58;G5BVI3;F1LT35;D3ZTH8;B5DES1;A0A091DRY7;P62752;A0A091CUN2;G5C7W2;A0A091D3W8;G5BZ36;G5AUJ4;G5ATF3;D4AAL7;D3ZTX9;G5BUV7;G5AWP9;G5BGI5;G5C9V7;G5ANU6	G5BX58;G5BVI3;F1LT35;D3ZTH8;B5DES1;A0A091DRY7;P62752;A0A091CUN2;G5C7W2;A0A091D3W8;G5BZ36;G5AUJ4;G5ATF3;D4AAL7;D3ZTX9;G5BUV7;G5AWP9	60S ribosomal protein L23a	RGD1564606;LOC689899;Rpl23a;LOC688776;RGD1565170		17.836	0	51.385	0	0	17553000	12	0	0	12	0	0	3	0	0	3	0	0	3	0	0	16	0	0	206960000
33296000	0	38223	33258000	D3ZBN0	D3ZBN0	Histone H1.5	Hist1h1b		22.649	0	31.312	0	266530	24223000	25	0	1	24	0	1	4	0	1	3	0	1	3	0	9	14.9	0	344010	299320000
29369000	0	199440	29170000	A0A0G2K1L8	A0A0G2K1L8		Basp1	plasma protein	21.719	0	188.79	0	0	23113000	12	0	1	11	0	1	7	0	1	2	0	1	2	0	10	51.6	0	1994400	291700000
28506000	0	0	28506000	F1M2E9;D3ZD02;D3ZRM9;P41123;A0A0G2JYG9;G5API3;A0A091DNL4	F1M2E9;D3ZD02;D3ZRM9;P41123;A0A0G2JYG9;G5API3;A0A091DNL4	60S ribosomal protein L13	Rpl13;RGD1563145;LOC100360491		24.069	0	153.33	0	0	20572000	9	0	0	9	0	0	3	0	0	3	0	0	3	0	0	15.7	0	0	256550000
26630000	0	0	26630000	P25886;F1LWX2;F1M4V2;D3ZWV1;F1LYI5;A0A0G2QC62;M0R665;D4A883;F1M682;A0A0G2K9E6;F1LSZ1;D3ZIV1;D4A888;F1M577;A0A0G2JT96;D3Z8Q4;D3ZFF1;G5AXN2;A0A091DNP9	P25886;F1LWX2;F1M4V2;D3ZWV1;F1LYI5;A0A0G2QC62;M0R665	60S ribosomal protein L29	Rpl29;RGD1565455;RGD1564138;LOC686807		17.325	0	26.49	0	0	11582000	8	0	0	8	0	0	4	0	0	4	0	0	4	0	0	23.7	0	0	133150000
26237000	0	0	26237000	P38983;G5ALW6;A0A091DMF6;A0A0P6K1L6	P38983;G5ALW6;A0A091DMF6;A0A0P6K1L6	40S ribosomal protein SA	Rpsa		32.824	0	323.31	0	0	23796000	12	0	0	12	0	0	4	0	0	4	0	0	4	0	0	15.6	0	0	341090000
26040000	0	0	26040000	G5BJ78;A0A0S3NT96;Q5XI73	G5BJ78;A0A0S3NT96;Q5XI73	Rho GDP-dissociation inhibitor 1	Arhgdia	plasma protein	23.412	0	34.342	0	0	20644000	7	0	0	7	0	0	1	0	0	1	0	0	1	0	0	15.7	0	0	234360000
23215000	0	0	23215000	G5BMF7;G5BNC2;F1M2K3;G5BF89;A0A091CWJ1;A0A091D7J0;P61959;Q5XIF4	G5BMF7;G5BNC2;F1M2K3;G5BF89;A0A091CWJ1;A0A091D7J0;P61959;Q5XIF4	Small ubiquitin-related modifier 2;Small ubiquitin-related modifier 3	Sumo2;Sumo3	sumo2=intracellular, sumo3=plasma	9.8229	0	7.3803	0	0	3942700	2	0	0	2	0	0	1	0	0	1	0	0	1	0	0	14	0	0	46430000
20938000	0	41247	20897000	A0A091CMW5;G5AQI3;Q76MJ6;D3ZEV0;A0A0P6JUJ6;Q3ZAV2;A0A091E4W6;P62961	A0A091CMW5;G5AQI3;Q76MJ6;D3ZEV0;A0A0P6JUJ6;Q3ZAV2;A0A091E4W6;P62961	Nuclease-sensitive element-binding protein 1	Ybx1;LOC100912427	plasma protein	27.704	0	257.35	0	0	15845000	12	0	1	11	0	1	2	0	1	2	0	1	2	0	8.3	16.2	0	371220	188070000
20907000	0	0	20907000	Q5RJL1;A0A0G2JYP0;G5BT65;A0A0G2JYS6;Q5RJK5;D3ZRS6;A0A0P6JHX7	Q5RJL1;A0A0G2JYP0;G5BT65;A0A0G2JYS6;Q5RJK5;D3ZRS6;A0A0P6JHX7		Cbx3;LOC100360260	plasma protein	7.9271	0	28.737	0	0	3745600	4	0	0	4	0	0	2	0	0	2	0	0	2	0	0	16.9	0	0	41813000
19137000	0	0	19137000	Q9JI54;O88791	Q9JI54;O88791		Hmga2	plasma protein	3.8282	0	29.802	0	0	1658200	10	0	0	10	0	0	4	0	0	4	0	0	4	0	0	70.3	0	0	19137000
18372000	0	0	18372000	G5B5G0;G5B3L1;G3V6I9;D4AE42;D4A1Z2;D3ZSF2;P12749	G5B5G0;G5B3L1;G3V6I9;D4AE42;D4A1Z2;D3ZSF2;P12749	60S ribosomal protein L26	Rpl26;Rpl26-ps1;Rpl26-ps2;LOC688981		17.258	0	80.034	0	0	7830200	9	0	0	9	0	0	2	0	0	2	0	0	2	0	0	9	0	0	110230000
17287000	0	0	17287000	G5C569;Q6PDV8;A0A0N8ESF8;A0A091E9C9;P47198	G5C569;Q6PDV8;A0A0N8ESF8;A0A091E9C9;P47198	60S ribosomal protein L22	LOC100363800;Rpl22		14.36	0	6.3878	0	0	5258700	2	0	0	2	0	0	1	0	0	1	0	0	1	0	0	12.1	0	0	69148000
16948000	0	0	16948000	D4ACJ7;Q6P6G9;Q5I0M7;A0A0P6JBQ6;P04256;G5BID7;G5C268	D4ACJ7;Q6P6G9;Q5I0M7;A0A0P6JBQ6;P04256;G5BID7	Heterogeneous nuclear ribonucleoprotein A1;Heterogeneous nuclear ribonucleoprotein A1, N-terminally processed	Hnrnpa1;Hnrpa1	plasma protein	26.728	0	323.31	0	0	17668000	22	0	0	22	0	0	3	0	0	3	0	0	3	0	0	12.2	0	0	203370000
15736000	0	0	15736000	Q62622	Q62622	Eukaryotic translation initiation factor 4E-binding protein 1	Eif4ebp1	intracellular	12.404	0	70.16	0	0	2706100	4	0	0	4	0	0	1	0	0	1	0	0	1	0	0	10.3	0	0	31472000
15669000	0	0	15669000	A0A0P6IWW8;P62914;Q4V8I6;G5BHY5;A0A0G2K3Y8;REV__G5B916;REV__A0A0P6K8R4;A0A091DK87	A0A0P6IWW8;P62914	60S ribosomal protein L11	Rpl11		20.252	0	48.071	0	0	11455000	15	0	0	15	0	0	3	0	0	3	0	0	3	0	0	12.4	0	0	156690000
15133000	0	50129	15083000	D4A0L4;Q3KRC7;F1MA18;Q62764-2;Q62764	D4A0L4;Q3KRC7;F1MA18;Q62764-2;Q62764	Y-box-binding protein 3	Ybx3	intracellular	31.287	0	323.31	0	0	15521000	6	0	1	5	0	1	2	0	1	2	0	1	2	0	6.5	17.2	0	601550	181000000
14738000	0	0	14738000	G5AYR5;G5AYR4;P43278	G5AYR5;G5AYR4;P43278	Histone H1.0;Histone H1.0, N-terminally processed	H1f0		18.165	0	25.46	0	0	3331900	17	0	0	17	0	0	2	0	0	2	0	0	2	0	0	8.3	0	0	44214000
14615000	0	0	14615000	A0A0A7HUH5;P62828;A0A0R3SHN7;Q66H11;A0A0N4YDT1;A0A0K0DKR3;A0A091CYZ6	A0A0A7HUH5;P62828;A0A0R3SHN7;Q66H11;A0A0N4YDT1;A0A0K0DKR3	GTP-binding nuclear protein Ran	Ran;RGD1306195	plasma protein	24.423	0	37.245	0	0	13364000	11	0	0	11	0	0	3	0	0	3	0	0	3	0	0	16.7	0	0	160760000
14162000	0	0	14162000	Q6PDV9;A0A0P6J0Q6;P62282;G5B8P3	Q6PDV9;A0A0P6J0Q6;P62282	40S ribosomal protein S11	Rps11		18.447	0	34.731	0	0	11271000	7	0	0	7	0	0	5	0	0	5	0	0	3	0	0	18.4	0	0	141620000
13929000	0	0	13929000	Q8K585-2;Q8K585;G5BCG4;A0A0P6J786;A0A091CZ20	Q8K585-2;Q8K585	High mobility group protein HMG-I/HMG-Y	Hmga1	intracellular	10.709	0	323.31	0	0	5765000	17	0	0	17	0	0	5	0	0	5	0	0	5	0	0	57.3	0	0	69646000
13733000	0	0	13733000	F2Z3T8;P63219	F2Z3T8;P63219	Guanine nucleotide-binding protein subunit gamma;Guanine nucleotide-binding protein G(I)/G(S)/G(O) subunit gamma-5	LOC100360499;Gng5	intracellular	7.1872	0	96.147	0	0	3591500	16	0	0	16	0	0	2	0	0	2	0	0	2	0	0	16.4	0	0	54933000
13349000	0	0	13349000	A0A091DXM3;G3V9R8;A0A0G2K7B3;G5BFV5;A0A0P6J9Y6;A0A0G2JXW4;G5B8D1	A0A091DXM3;G3V9R8;A0A0G2K7B3;G5BFV5;A0A0P6J9Y6;A0A0G2JXW4		Hnrnpc	plasma protein	32.453	0	18.749	0	0	20923000	6	0	0	6	0	0	3	0	0	3	0	0	3	0	0	7.8	0	0	240270000
13326000	0	0	13326000	M0RCC5;A0A0G2KA79;M0R5K9;A0A0H2UHT6;G5BAZ4;D3ZM33;D3ZAU6;A0A0N8ESM4;A0A091CWR0;P62271	M0RCC5;A0A0G2KA79;M0R5K9;A0A0H2UHT6;G5BAZ4;D3ZM33;D3ZAU6;A0A0N8ESM4;A0A091CWR0;P62271	40S ribosomal protein S18	LOC100912024;LOC100362298;RGD1561919;Rps18		11.975	0	11.362	0	0	8535400	2	0	0	2	0	0	2	0	0	2	0	0	2	0	0	7.6	0	0	106610000
13126000	0	0	13126000	Q53Z83;P02803;A0A0H2UHT7;Q2XTB0;Q91ZP8;Q7M082	Q53Z83;P02803;A0A0H2UHT7	Metallothionein;Metallothionein-1	Mt1	intracellular	6.0061	0	82.566	0	0	3140800	4	0	0	4	0	0	3	0	0	3	0	0	3	0	0	85.2	0	0	39377000
12759000	0	0	12759000	G5BB30;P35213;A0A091E596	G5BB30;P35213	14-3-3 protein beta/alpha;14-3-3 protein beta/alpha, N-terminally processed	Ywhab	plasma protein	28.082	0	43.323	0	0	11824000	21	0	0	21	0	0	4	0	0	4	0	0	3	0	0	13.4	0	0	178620000
12439000	0	0	12439000	P36972	P36972	Adenine phosphoribosyltransferase	Aprt	plasma protein	19.546	0	89.929	0	0	12317000	2	0	0	2	0	0	1	0	0	1	0	0	1	0	0	6.1	0	0	149270000
12254000	0	0	12254000	A0A0H2UHG7;G5B335;D3ZZK1;A0A0G2K6L6;A0A091DCD6;P60868;A0A0G2JY70	A0A0H2UHG7;G5B335;D3ZZK1;A0A0G2K6L6;A0A091DCD6;P60868	40S ribosomal protein S20	LOC100359563;Rps20		13.241	0	276.83	0	0	5233600	6	0	0	6	0	0	3	0	0	3	0	0	3	0	0	15.3	0	0	61270000
12019000	0	0	12019000	G5C5Q8;D4A6W6;A0A0P6J3A4;A0A091DJB9;P62919	G5C5Q8;D4A6W6;A0A0P6J3A4;A0A091DJB9;P62919	60S ribosomal protein L8	RGD1561333;Rpl8		28.024	0	113.39	0	0	9478400	5	0	0	5	0	0	2	0	0	2	0	0	2	0	0	10.5	0	0	120190000
11921000	0	0	11921000	A0A0G2K2E4;A0A0G2K1P0;P10111	A0A0G2K2E4;A0A0G2K1P0;P10111	Peptidyl-prolyl cis-trans isomerase A;Peptidyl-prolyl cis-trans isomerase A, N-terminally processed	Ppia	plasma protein	17.822	0	149.25	0	0	8591900	8	0	0	8	0	0	2	0	0	2	0	0	1	0	0	16.5	0	0	107290000
11668000	0	0	11668000	G5C1F9;A0A0G2K8M9;G5BBZ6;A0A0P6JG10;A0A0P6JAJ2;A0A091DXM5;A0A091DHS5;P54313;O35353	G5C1F9;A0A0G2K8M9;G5BBZ6;A0A0P6JG10;A0A0P6JAJ2;A0A091DXM5;A0A091DHS5;P54313;O35353	Guanine nucleotide-binding protein G(I)/G(S)/G(T) subunit beta-2;Guanine nucleotide-binding protein subunit beta-4	Gnb2;Gnb4	intracellular	25.895	0	7.2109	0	0	10905000	2	0	0	2	0	0	1	0	0	1	0	0	1	0	0	6	0	0	128340000
11386000	0	0	11386000	Q2KP10;Q6P684	Q2KP10;Q6P684		Smn1	intracellular	21.783	0	323.31	0	0	6833600	10	0	0	10	0	0	2	0	0	2	0	0	2	0	0	9.6	0	0	113860000
11100000	0	0	11100000	G5C400;G5BSI3;G5BG97;Q5U3Y8;M0R5M7;G5CB15;G5AVD5;G5ASH0;A0A0G2K5C5;G5B3W8	G5C400;G5BSI3;G5BG97;Q5U3Y8;M0R5M7;G5CB15;G5AVD5;G5ASH0;A0A0G2K5C5;G5B3W8		Btf3;RGD1563812	plasma protein	12.295	0	15.179	0	0	3681700	5	0	0	5	0	0	1	0	0	1	0	0	1	0	0	9.6	0	0	55502000
10955000	0	0	10955000	G5BRW3;A0A091DRX3;P84100;F1M5A9	G5BRW3;A0A091DRX3;P84100	60S ribosomal protein L19	Rpl19		23.466	0	17.423	0	0	5298000	7	0	0	7	0	0	3	0	0	3	0	0	3	0	0	16.8	0	0	65730000
9694100	0	0	9694100	G5AXS2;B0BMW0;A0A091D0U8;P61107	G5AXS2;B0BMW0;A0A091D0U8;P61107	Ras-related protein Rab-14	Rab14	plasma protein	23.897	0	36.81	0	0	12507000	4	0	0	4	0	0	2	0	0	2	0	0	2	0	0	7	0	0	155110000
9408900	0	0	9408900	A0A0G2K200;B0BN81;P24050;G5B7K7;A0A091DWD4	A0A0G2K200;B0BN81;P24050;G5B7K7;A0A091DWD4	40S ribosomal protein S5;40S ribosomal protein S5, N-terminally processed	Rps5		19.334	0	144.35	0	0	6221600	6	0	0	6	0	0	2	0	0	2	0	0	2	0	0	15.2	0	0	75271000
8754000	0	0	8754000	M0RBI3;D4A5Y6;B5DFB7;A0A0G2K1A0	M0RBI3;D4A5Y6;B5DFB7;A0A0G2K1A0		LOC102553099;Naa50	intracellular	19.317	0	122.16	0	0	7436400	5	0	0	5	0	0	1	0	0	1	0	0	1	0	0	10.1	0	0	96294000
8732100	0	0	8732100	G5BEH4;A0A0N8ETE8;A0A0H2UHH9;A0A096MIU7;D4ACJ1;G5ASU6;A0A091E0Z8;P62850-2;P62850-3;P62850;G5BUT8;G5AWL0;G5C0V0;G5BMJ3;G5BWS0;G5BH31	G5BEH4;A0A0N8ETE8;A0A0H2UHH9;A0A096MIU7;D4ACJ1;G5ASU6;A0A091E0Z8;P62850-2;P62850-3;P62850;G5BUT8;G5AWL0;G5C0V0;G5BMJ3;G5BWS0;G5BH31	40S ribosomal protein S24	LOC100363469;Rps24		15.063	0	11.454	0	0	3707200	9	0	0	9	0	0	2	0	0	2	0	0	2	0	0	13.1	0	0	43661000
8171400	0	0	8171400	G5B8I5;A0A0P6JDF0;A0A091CT22;Q498M4	G5B8I5;A0A0P6JDF0;A0A091CT22;Q498M4	WD repeat-containing protein 5	Wdr5	intracellular	3.9434	0.0018975	6.1763	0	0	1387000	3	0	0	3	0	0	1	0	0	1	0	0	1	0	0	35.1	0	0	16343000
7817300	8271.7	0	7809000	P18420	P18420	Proteasome subunit alpha type-1	Psma1	intracellular	29.517	0	13.297	303710	0	7860100	15	0	0	15	1	0	1	1	0	1	1	0	1	7.6	0	7.6	140620	0	132750000
7606100	0	0	7606100	Q0QEW8;A0A0H2UHS7;P12001	Q0QEW8;A0A0H2UHS7;P12001	60S ribosomal protein L18	Rpl18		18.87	0	12.585	0	0	3853900	2	0	0	2	0	0	2	0	0	2	0	0	2	0	0	15.8	0	0	45637000
7589900	0	0	7589900	G5C5Z3;A0A0P6IZP9;A0A091DEE5;E9PU16;Q7TPK7;A0A0G2K235;Q6NYB7	G5C5Z3;A0A0P6IZP9;A0A091DEE5;E9PU16;Q7TPK7;A0A0G2K235;Q6NYB7	Ras-related protein Rab-1A	Rab1;Rab1a;Rab1A	plasma protein	21.825	0	158.77	0	0	7614900	12	0	0	12	0	0	3	0	0	3	0	0	3	0	0	8.6	0	0	106260000
7355900	0	0	7355900	B0BNJ5;A0A0P6K167;P69736	B0BNJ5;A0A0P6K167;P69736	Endothelial differentiation-related factor 1	Edf1	intracellular	16.369	0	12.431	0	0	5631000	1	0	0	1	0	0	1	0	0	1	0	0	1	0	0	8.1	0	0	66203000
7351400	0	0	7351400	Q5BJX0	Q5BJX0	N-terminal Xaa-Pro-Lys N-methyltransferase 1;N-terminal Xaa-Pro-Lys N-methyltransferase 1, N-terminally processed	Ntmt1	intracellular	25.464	0	194.67	0	0	6247800	4	0	0	4	0	0	1	0	0	1	0	0	1	0	0	6.3	0	0	73514000
7294600	0	0	7294600	G5BR22;G5AP82;D4ADF5	G5BR22;G5AP82;D4ADF5		Pdcd5	plasma protein	14.328	0	29.46	0	0	6026500	3	0	0	3	0	0	2	0	0	2	0	0	2	0	0	8	0	0	72946000
7143100	0	0	7143100	G5B356;B0BNL2;A0A0P6JDR9	G5B356;B0BNL2;A0A0P6JDR9		LOC364561	intracellular	18.187	0	292.41	0	0	5988200	3	0	0	3	0	0	1	0	0	1	0	0	1	0	0	7.4	0	0	71431000
7124200	0	0	7124200	A0A0G2KBA1;Q6P790;H7C5Y5;F1LQS3;P21533;G5CAJ2;G5AKV6;A0A091D098	A0A0G2KBA1;Q6P790;H7C5Y5;F1LQS3;P21533;G5CAJ2;G5AKV6;A0A091D098	60S ribosomal protein L6	Rpl6		31.926	0	11.775	0	0	7558000	5	0	0	5	0	0	2	0	0	2	0	0	2	0	0	8.1	0	0	92614000
7049100	0	0	7049100	P05982;G5AK39;A0A0P6JT15;A0A091CRN5	P05982	NAD(P)H dehydrogenase [quinone] 1	Nqo1	intracellular	30.946	0	19.098	0	0	8672000	8	0	0	8	0	0	3	0	0	3	0	0	3	0	0	7.7	0	0	105740000
6930500	0	0	6930500	G5AZM9;M0R8K2;B5DES0;A0A0P6K1F7;A0A091CK28	G5AZM9;M0R8K2;B5DES0;A0A0P6K1F7;A0A091CK28		Snrpd2l;Snrpd2	intracellular	10.516	0.0053097	6.0198	0	0	2555400	1	0	0	1	0	0	1	0	0	1	0	0	1	0	0	7.7	0	0	27722000
6881200	0	0	6881200	Q4AE93;G5AMJ3;E3VX50;E3VX49;P62634	Q4AE93;G5AMJ3;E3VX50;E3VX49;P62634	Cellular nucleic acid-binding protein	Cnbp	plasma protein	2.5578	0	61.325	0	0	1211500	3	0	0	3	0	0	1	0	0	1	0	0	1	0	0	41.7	0	0	13762000
6537700	0	0	6537700	G5C4P3;G5B5M9;D3ZW57;D4AD70;A0A0P6IYP5;D3ZZH2;P63174	G5C4P3;G5B5M9;D3ZW57;D4AD70;A0A0P6IYP5;D3ZZH2;P63174	60S ribosomal protein L38	LOC686066;RGD1561636;LOC680353;Rpl38		8.0875	0	7.5585	0	0	1536400	3	0	0	3	0	0	1	0	0	1	0	0	1	0	0	14.5	0	0	19613000
6259600	0	0	6259600	G5C8G4;A0A091D800	G5C8G4;A0A091D800				11.745	0	14.376	0	0	2647900	3	0	0	3	0	0	2	0	0	2	0	0	1	0	0	25.2	0	0	31298000
6046400	0	0	6046400	A0A0G2JUX5;Q68A21	A0A0G2JUX5		Purb	intracellular	33.532	0	164.55	0	0	4566700	8	0	0	8	0	0	3	0	0	3	0	0	3	0	0	12.9	0	0	54418000
5943000	0	0	5943000	D3ZIU2	D3ZIU2		Psmg3	intracellular	13.346	0.005137	5.9708	0	0	2630200	2	0	0	2	0	0	1	0	0	1	0	0	1	0	0	8.2	0	0	29715000
5933300	0	0	5933300	O35050;A0A0P6K8J3;A0A091CM57;P62198	O35050;A0A0P6K8J3;A0A091CM57;P62198	26S protease regulatory subunit 8	Psmc5	plasma protein	3.614	0.0019194	6.1983	0	0	479840	1	0	0	1	0	0	1	0	0	1	0	0	1	0	0	43.8	0	0	5933300
5841400	0	0	5841400	G5BN75;D4A8G0	G5BN75;D4A8G0		Lsm12	intracellular	16.91	0	9.1345	0	0	2812400	2	0	0	2	0	0	1	0	0	1	0	0	1	0	0	9.3	0	0	35048000
5589900	0	0	5589900	P49242;M0R6L4;G5C1K3;A0A091DWY0;G5C1L6;G5BZC7;G5C0A3;G5BKS7;G5C900;G5B6C9;G5AWA5;A0A091D8X0;A0A091DA72;G5BDZ0;Q6TXJ6	P49242;M0R6L4;G5C1K3;A0A091DWY0;G5C1L6	40S ribosomal protein S3a;40S ribosomal protein S3b;40S ribosomal protein S3a	Rps3a;LOC100365839		29.945	0	53.46	0	0	7894700	11	0	0	11	0	0	5	0	0	5	0	0	5	0	0	21.2	0	0	95029000
5303600	0	0	5303600	G5BFK5;A0A091D943;A0A0P6IZG8;Q6PDV7	G5BFK5;A0A091D943;A0A0P6IZG8;Q6PDV7	60S ribosomal protein L10	Rpl10		22.622	0	8.8894	0	0	3588900	3	0	0	3	0	0	1	0	0	1	0	0	1	0	0	6.6	0	0	42429000
5227500	0	34559	5192900	G5AP01;P63102;A0A091DLH5;A0A091DN51;A0A0G2JV65;A0A091DSZ1	G5AP01;P63102;A0A091DLH5;A0A091DN51;A0A0G2JV65;A0A091DSZ1	14-3-3 protein zeta/delta	Ywhaz	plasma protein	27.745	0	13.936	0	0	4758000	8	0	1	7	0	1	2	0	1	2	0	1	2	0	3.7	9.4	0	483830	72701000
5109200	0	0	5109200	A0A0G2JWE1;A0A0P6J1F8;A0A0G2K6J5;A0A091DT92;B2GV99;Q64119;G5BB85;A0A091DP40	A0A0G2JWE1;A0A0P6J1F8;A0A0G2K6J5;A0A091DT92;B2GV99;Q64119;G5BB85;A0A091DP40	Myosin light polypeptide 6	Myl6	plasma protein	12.528	0	23.125	0	0	3505700	6	0	0	6	0	0	2	0	0	2	0	0	2	0	0	22.5	0	0	40874000
5016500	0	0	5016500	A0A0G2K2B8;P68511;G5BBV6;G5BTX3;A0A091D8Z7;A0A091CZK1	A0A0G2K2B8;P68511;G5BBV6;G5BTX3;A0A091D8Z7;A0A091CZK1	14-3-3 protein eta	Ywhah	plasma protein	31.699	0	13.202	0	0	7888600	4	0	0	4	0	0	2	0	0	2	0	0	2	0	0	7.7	0	0	90297000
4844600	0	0	4844600	Q9QX67	Q9QX67	Death-associated protein 1	Dap	intracellular	11.165	0	6.3394	0	0	3205700	4	0	0	4	0	0	1	0	0	1	0	0	1	0	0	10.8	0	0	38757000
4506100	0	0	4506100	Q27I67	Q27I67	thymosin beta 4	tmsb4	plasma protein	4.3789	0.0051546	5.9752	0	0	317800	2	0	0	2	0	0	1	0	0	1	0	0	1	0	0	23.7	0	0	4506100
4376400	0	78189	4298300	G5BV28;A0A0N4XET7;A0A0K0DRB6;A0A091DUB1;G5BSF6;G5BKL3;A0A0R3SFR8;A0A0K0DCI2;A0A091EES9;A0A091DRM4;A0A091EES4;P62804;Q5BM22;A0A0K0CVB1;G5BT51;G5BSF5;A0A0G2K0N8;G5BSF9;G5C993;M0RBX6;G5BV26;G5BQE3;G5BP92;G5BAP1;G5AQX2;D3ZK97;D3ZJ08;B0BMY8;A0A0R3SZ50;A0A0R3SXN3;A0A0R3SV28;A0A0R3SLN9;A0A0R3SE97;A0A0N4Y291;A0A0N4XPK2;A0A0K0DRK2;A0A0K0D4X1;A0A0G2K9I5;A0A091DTZ9;A0A091DP01;A0A091D7U9;A0A0R3SKN7;G5BQD9;C7…	G5BV28;A0A0N4XET7;A0A0K0DRB6;A0A091DUB1;G5BSF6;G5BKL3;A0A0R3SFR8;A0A0K0DCI2;A0A091EES9;A0A091DRM4;A0A091EES4;P62804	Histone H4;Osteogenic growth peptide	Hist1h4b		25.109	0	11.49	0	209070	0	2	0	1	1	0	1	2	0	1	1	0	1	0	0	3.2	7.7	0	781890	42983000
4355700	0	0	4355700	A0A091EHN5;G5BT96;P62997	A0A091EHN5;G5BT96;P62997	Transformer-2 protein homolog beta	Tra2b	plasma protein	29.516	0	18.918	0	0	4267700	4	0	0	4	0	0	1	0	0	1	0	0	1	0	0	5.5	0	0	52269000
4236300	0	0	4236300	G5ANZ3;F1LZN9;A0A0P6J1T4;A0A091DY98	G5ANZ3;F1LZN9;A0A0P6J1T4;A0A091DY98		Polr2k	intracellular	6.6458	0	6.3298	0	0	368660	1	0	0	1	0	0	1	0	0	1	0	0	1	0	0	20	0	0	4236300
4045800	0	0	4045800	A0A0G2K447	A0A0G2K447		Shisa5	membrane protein	26.362	0	6.5405	0	0	619100	1	0	0	1	0	0	1	0	0	1	0	0	1	0	0	6.6	0	0	8091500
3838700	0	0	3838700	Q5RJR8;A0A091DV39;G5C4J6	Q5RJR8;A0A091DV39;G5C4J6	Leucine-rich repeat-containing protein 59	Lrrc59	membrane protein	34.869	0	36.652	0	0	4314600	8	0	0	8	0	0	2	0	0	2	0	0	2	0	0	7.5	0	0	53741000
3808200	0	0	3808200	Q5XIE8;G5BFH4;A0A091D6V9;G5BHC4	Q5XIE8;G5BFH4;A0A091D6V9;G5BHC4	Integral membrane protein 2B;BRI2, membrane form;BRI2 intracellular domain;BRI2C, soluble form;Bri23 peptide	Itm2b	membrane protein	30.314	0	11.25	0	0	4759600	2	0	0	2	0	0	2	0	0	2	0	0	2	0	0	6.8	0	0	53315000
3805300	0	0	3805300	G3V913;P42930;A0A091DYD0;G5BG60;A0A0P6JHI7	G3V913;P42930;A0A091DYD0;G5BG60;A0A0P6JHI7	Heat shock protein beta-1	Hspb1		22.807	0	52.01	0	0	4143500	10	0	0	10	0	0	2	0	0	2	0	0	2	0	0	14.6	0	0	49469000
3781200	0	0	3781200	D3ZD11	D3ZD11		Spcs2	plasma protein	24.973	0	297.84	0	0	3836600	12	0	0	12	0	0	2	0	0	2	0	0	2	0	0	13.7	0	0	45374000
3673300	0	0	3673300	G3V6P8	G3V6P8	Guanine nucleotide-binding protein subunit gamma	Gng12	intracellular	7.9851	0	81.356	0	0	1271400	5	0	0	5	0	0	1	0	0	1	0	0	1	0	0	19.4	0	0	14693000
3626700	0	0	3626700	M0R4L7	M0R4L7	Histone H2B	Hist1h2bl		13.91	0	7.5944	0	0	2307100	2	0	0	2	0	0	4	0	0	1	0	0	1	0	0	34.9	0	0	25387000
3624300	0	3624300	0	Q71DI1	Q71DI1	dermicidin		plasma protein	11.284	0	122.8	0	1590800	0	2	0	2	0	0	2	0	0	2	0	0	2	0	0	20.9	0	0	18121000	0
3577300	0	0	3577300	G5ALN8;A0A091E3G4;Q9JJ54-4;Q9JJ54-3;Q9JJ54-2;Q9JJ54	G5ALN8;A0A091E3G4;Q9JJ54-4;Q9JJ54-3;Q9JJ54-2;Q9JJ54	Heterogeneous nuclear ribonucleoprotein D0	Hnrnpd		31.603	0	67.719	0	0	3165300	1	0	0	1	0	0	1	0	0	1	0	0	1	0	0	5.1	0	0	46505000
3524800	0	0	3524800	G5B3A0;A0A091D0A7;Q5PQT7	G5B3A0;A0A091D0A7;Q5PQT7	Pleckstrin homology-like domain family A member 3	Phlda3	intracellular	13.689	0	171.72	0	0	2438700	3	0	0	3	0	0	1	0	0	1	0	0	1	0	0	11.2	0	0	28199000
3485600	0	0	3485600	F1LXS6;A0A0P6J4B3	F1LXS6;A0A0P6J4B3		Thoc7	intracellular	23.699	0	9.3037	0	0	4028100	2	0	0	2	0	0	1	0	0	1	0	0	1	0	0	5.4	0	0	45313000
3256800	0	0	3256800	G5C9S0;Q6P685;A0A0P6K6M1;G5B574;G5BAU6;G5B4T8;G5AMH7;G5BD07;G5BPT9;A0A091DK41	G5C9S0;Q6P685;A0A0P6K6M1;G5B574		Eif2s2	plasma protein	26.038	0	323.31	0	0	2598200	7	0	0	7	0	0	3	0	0	3	0	0	3	0	0	11.4	0	0	29312000
3233000	0	0	3233000	A0A0N4XPK3	A0A0N4XPK3		uncharacterized protein		15.085	0.0050676	5.9307	0	0	1204200	2	0	0	2	0	0	1	0	0	1	0	0	1	0	0	13.5	0	0	12932000
3210000	0	0	3210000	G5B771;A0A091CZU9;P63170	G5B771;A0A091CZU9;P63170	Dynein light chain 1, cytoplasmic	Dynll1	plasma protein	10.366	0	323.31	0	0	1205400	4	0	0	4	0	0	1	0	0	1	0	0	1	0	0	24.7	0	0	16050000
3182900	0	0	3182900	A0A0H2UHW4;Q7TP40	A0A0H2UHW4;Q7TP40	PEST proteolytic signal-containing nuclear protein	Pcnp	intracellular	20.081	0	55.223	0	0	2389300	5	0	0	5	0	0	1	0	0	1	0	0	1	0	0	8	0	0	31829000
3108100	0	0	3108100	A0A0R3ST08	A0A0R3ST08		uncharacterized protein		16.583	0	6.4899	0	0	1866600	2	0	0	2	0	0	1	0	0	1	0	0	1	0	0	7.7	0	0	21756000
3085100	0	0	3085100	Q642E2;G5BVZ2;D3ZJD3;A0A091DZG3;P17702;D3ZEI0;Q6TUD7;A0A0G2K8E0	Q642E2;G5BVZ2;D3ZJD3;A0A091DZG3;P17702;D3ZEI0	60S ribosomal protein L28	LOC100362069;RGD1565183;Rpl28;LOC690096		15.733	0	49.756	0	0	1921900	6	0	0	6	0	0	3	0	0	3	0	0	3	0	0	14.6	0	0	24681000
3084900	0	0	3084900	Q498U4	Q498U4	SAP domain-containing ribonucleoprotein	Sarnp	plasma protein	23.605	0	17.536	0	0	2891300	2	0	0	2	0	0	2	0	0	2	0	0	2	0	0	5.2	0	0	37019000
2868600	166070	475780	2226700	A0A0G2JWJ4;P48500;G5CAR5;Q6SA19;A0A091CQ98;A0A0G2JWU1	A0A0G2JWJ4;P48500;G5CAR5;Q6SA19;A0A091CQ98;A0A0G2JWU1	Triosephosphate isomerase	Tpi1;LOC500959	plasma protein	29.057	0	32.023	0	2999200	3780000	15	2	6	7	1	3	3	1	3	3	1	3	3	4.9	13.3	13.3	3155300	9039900	42308000
2795700	0	0	2795700	A0A0P6JCV6;P62718;G5B4E2;F1M0K6	A0A0P6JCV6;P62718;G5B4E2;F1M0K6	60S ribosomal protein L18a	Rpl18a;RGD1565566		24.654	0	15	0	0	2434200	5	0	0	5	0	0	2	0	0	2	0	0	2	0	0	12.7	0	0	27957000
2782800	0	0	2782800	Q8K4B3;Q6IRI7	Q8K4B3;Q6IRI7		Mafk	intracellular	17.551	0	7.289	0	0	1951700	2	0	0	2	0	0	1	0	0	1	0	0	1	0	0	7.1	0	0	25045000
2742600	0	0	2742600	G5BHC5;B1WC25	G5BHC5;B1WC25		Tra2a	intracellular	32.688	0	30.762	0	0	3117500	6	0	0	6	0	0	3	0	0	3	0	0	3	0	0	9.2	0	0	41138000
2673000	0	0	2673000	G5B8Y1;G5C018	G5B8Y1;G5C018		PNCNP	intracellular	13.584	0	14.61	0	0	1800200	5	0	0	5	0	0	2	0	0	2	0	0	2	0	0	14	0	0	21384000
2636000	0	0	2636000	A0A0G2JZE6;A0A0P6J231;G5B7J7;A0A091CSG2;P63245	A0A0G2JZE6;A0A0P6J231;G5B7J7;A0A091CSG2;P63245	Guanine nucleotide-binding protein subunit beta-2-like 1;Guanine nucleotide-binding protein subunit beta-2-like 1, N-terminally processed	Gnb2l1	plasma protein	32.738	0	12.936	0	0	4558200	3	0	0	3	0	0	2	0	0	2	0	0	2	0	0	3.7	0	0	50083000
2604300	0	0	2604300	G3V8T9	G3V8T9		Bax	intracellular	21.444	0	75.489	0	0	1704600	3	0	0	3	0	0	1	0	0	1	0	0	1	0	0	10.9	0	0	20834000
2513900	0	0	2513900	D4AAM1	D4AAM1		LOC690349	intracellular	14.13	0	6.4833	0	0	938130	1	0	0	1	0	0	1	0	0	1	0	0	1	0	0	13	0	0	12569000
2448100	0	0	2448100	Q99MZ8	Q99MZ8	LIM and SH3 domain protein 1	Lasp1	plasma protein	29.97	0	12.984	0	0	2588500	5	0	0	5	0	0	2	0	0	2	0	0	2	0	0	5.3	0	0	34273000
2422900	0	0	2422900	B0BMV8;Q920D2	B0BMV8;Q920D2	Dihydrofolate reductase	Dhfr	intracellular	21.638	0	7.6394	0	0	2407700	1	0	0	1	0	0	1	0	0	1	0	0	1	0	0	8.6	0	0	29075000
2373000	0	0	2373000	G5AXQ7;A0A0G2K2G8;P09495	G5AXQ7;A0A0G2K2G8;P09495	Tropomyosin alpha-4 chain	Tpm4	plasma protein	7.9628	0.0054545	6.0831	0	0	681090	2	0	0	2	0	0	1	0	0	1	0	0	1	0	0	14.1	0	0	7118900
2356800	0	0	2356800	E0A3M4;Q6P6Q5;A0A091CQV1;G5BQQ4;A0A0P6JDI2;P08592-2;P08592	E0A3M4;Q6P6Q5;A0A091CQV1;G5BQQ4;A0A0P6JDI2;P08592-2;P08592	Amyloid beta A4 protein;N-APP;Soluble APP-alpha;Soluble APP-beta;C99;Beta-amyloid protein 42;Beta-amyloid protein 40;C83;P3(42);P3(40);C80;Gamma-secretase C-terminal fragment 59;Gamma-secretase C-terminal fragment 57;Gamma-secretase C-terminal fragment 50;C31	App	plasma protein	11.552	0	6.5537	0	0	1531900	2	0	0	2	0	0	1	0	0	1	0	0	1	0	0	11.4	0	0	16498000
2353000	0	0	2353000	M0RDC5;P11030	M0RDC5;P11030	Acyl-CoA-binding protein;Triakontatetraneuropeptide;Octadecaneuropeptide	Dbi	plasma protein	10.027	0	6.9989	0	0	796410	1	0	0	1	0	0	1	0	0	1	0	0	1	0	0	14.9	0	0	9412100
2308700	0	0	2308700	P35213-2	P35213-2	14-3-3 protein beta/alpha;14-3-3 protein beta/alpha, N-terminally processed	Ywhab	plasma protein	27.822	0.0053191	6.0226	0	0	2391400	4	0	0	4	0	0	2	0	0	1	0	0	1	0	0	11.9	0	0	32322000
2289800	0	0	2289800	A0A068F1Y2;D3KZ61;A0A0N4XPJ5;A0A0N4XJT8;A0A0R3SG60;A0A0K0DC92;F5GTJ3;Q9JLX9;A0A091EDG5	A0A068F1Y2;D3KZ61;A0A0N4XPJ5;A0A0N4XJT8;A0A0R3SG60;A0A0K0DC92;F5GTJ3		Actb	plasma protein	20.439	0	8.3521	0	0	1235900	6	0	0	6	0	2	7	0	0	1	0	0	1	0	6.5	40.9	0	0	25188000
2159900	0	0	2159900	Q4G079	Q4G079		Aimp1	intracellular	34.574	0	12.41	0	0	2591000	8	0	0	8	0	0	1	0	0	1	0	0	1	0	0	5.4	0	0	41039000
2150800	0	0	2150800	M0R4V3;O70377	M0R4V3;O70377	Synaptosomal-associated protein;Synaptosomal-associated protein 23	Snap23	intracellular	22.928	0	28.786	0	0	1892500	3	0	0	3	0	0	1	0	0	1	0	0	1	0	0	5.7	0	0	25810000
2093900	0	0	2093900	G5BIL3;G5AQE2	G5BIL3;G5AQE2		Ppia	plasma protein	17.899	0	27.562	0	0	1849200	2	0	0	2	0	0	2	0	0	1	0	0	1	0	0	14.6	0	0	20939000
2062600	0	0	2062600	G5BIP6;G5AKV2;A0A0P6JH89;A0A091DV80;A0A0H2UHQ1;G5AX30;F1LZX7;P24049;G5BZ70;G5ANE5;G5C1B0;G5BEY4;D3Z9G9;G5BGD4;G5ALD8;G5B7K6;A0A0G2KB77;Q7TPJ7	G5BIP6;G5AKV2;A0A0P6JH89;A0A091DV80;A0A0H2UHQ1;G5AX30;F1LZX7;P24049;G5BZ70;G5ANE5;G5C1B0;G5BEY4;D3Z9G9;G5BGD4;G5ALD8;G5B7K6;A0A0G2KB77;Q7TPJ7	60S ribosomal protein L17	Rpl17;RGD1560017;RGD1359290		17.712	0	12.056	0	0	1170100	3	0	0	3	0	0	2	0	0	2	0	0	2	0	0	15.7	0	0	14438000
2051700	0	0	2051700	D3ZIX4	D3ZIX4		H1fx		20.488	0	20.34	0	0	1834000	7	0	0	7	0	0	3	0	0	3	0	0	3	0	0	15.6	0	0	22568000
2046900	0	0	2046900	D3ZKU5;A0A0N8ESF6;A0A0G2K7E3;A0A091D9S4;D3ZX87;P62902;D3ZDE9;D3ZU04;D3Z8W1;F1LVW2;D4ABZ9;D3ZZ60;D3ZVF5;D3ZVY6;G5B795;A0A0N4XXW6	D3ZKU5;A0A0N8ESF6;A0A0G2K7E3;A0A091D9S4;D3ZX87;P62902;D3ZDE9;D3ZU04;D3Z8W1;F1LVW2;D4ABZ9;D3ZZ60;D3ZVF5;D3ZVY6;G5B795;A0A0N4XXW6	60S ribosomal protein L31	RGD1564839;LOC100910017;Rpl31;RGD1562055;LOC102550734;LOC680384;RGD1561317;Rpl31l4;LOC681356;Rpl31l3;LOC100359986		14.275	0	8.5571	0	0	1278200	1	0	0	1	0	0	2	0	0	1	0	0	1	0	0	15.3	0	0	14329000
2039900	0	0	2039900	D4A4D5;D3ZN03;G5B782;P19945	D4A4D5;D3ZN03;G5B782;P19945	60S acidic ribosomal protein P0	LOC498555;LOC100362751;Rplp0		11.706	0	7.2229	0	0	873670	2	0	0	2	0	0	2	0	0	2	0	0	1	0	0	42.6	0	0	10199000
2026200	0	0	2026200	A0A0G2K617;Q569B7	A0A0G2K617;Q569B7	RWD domain-containing protein 4	Rwdd4	intracellular	21.105	0	69.831	0	0	1044000	2	0	0	2	0	0	1	0	0	1	0	0	1	0	0	7.4	0	0	12157000
2023300	0	0	2023300	Q5RK10;P35427;A0A0N8ETI8;G5AVJ5	Q5RK10;P35427;A0A0N8ETI8	60S ribosomal protein L13a	Rpl13a		23.446	0	11.808	0	0	1485000	5	0	0	5	0	0	3	0	0	2	0	0	2	0	0	16.7	0	0	18209000
1849400	0	0	1849400	Q8K1G4;P05197	Q8K1G4;P05197	Elongation factor 2	Eef2	plasma protein	33.878	0	80.845	0	0	2788200	4	0	0	4	0	0	1	0	0	1	0	0	1	0	0	4.6	0	0	33289000
1793700	0	0	1793700	Q6P9U5;P17077;G5AX47;A0A0G2JXD0;G5BTI1;G5C3U8;G5BE87;A0A091DRG3;F1LX84;F1M7A9;M0RBD4	Q6P9U5;P17077;G5AX47;A0A0G2JXD0;G5BTI1;G5C3U8;G5BE87;A0A091DRG3;F1LX84;F1M7A9;M0RBD4	60S ribosomal protein L9	Rpl9;RGD1561928;LOC100911472		21.921	0	16.079	0	0	1347800	4	0	0	4	0	0	2	0	0	2	0	0	2	0	0	19.3	0	0	16144000
1769000	0	0	1769000	B5DEM5;F1LSW7;Q6TUH8;Q63507;D3ZHE6;G5ALX1;A0A0P6JHI9;A0A091DSR6	B5DEM5;F1LSW7;Q6TUH8;Q63507	60S ribosomal protein L14	Rpl14;LOC306079		23.78	0	87.279	0	0	987580	5	0	0	5	0	0	5	0	0	5	0	0	5	0	0	23.3	0	0	10614000
1723500	0	0	1723500	G5AKD1;A0A091CWN7;Q569C9;Q9ERE4	G5AKD1;A0A091CWN7;Q569C9;Q9ERE4	Golgi phosphoprotein 3	Golph3	intracellular	23.685	0.0051813	5.987	0	0	1475400	1	0	0	1	0	0	1	0	0	1	0	0	1	0	0	7.3	0	0	17235000
1685800	0	0	1685800	G5B2J7;M0RD75;A0A0P6J125;A0A091DH72;P62755;A0A0G2K7G8	G5B2J7;M0RD75;A0A0P6J125;A0A091DH72;P62755;A0A0G2K7G8	40S ribosomal protein S6	Rps6		25.941	0	28.29	0	0	971840	2	0	0	2	0	0	2	0	0	2	0	0	2	0	0	11.2	0	0	11800000
1684500	0	0	1684500	D3ZDS4	D3ZDS4		Emg1	plasma protein	26.924	0.0019084	6.188	0	0	2093500	4	0	0	4	0	0	1	0	0	1	0	0	1	0	0	4.1	0	0	25267000
1675800	0	0	1675800	A0A0P6JTI3;A0A091CYR2;Q6AYK1	A0A0P6JTI3;A0A091CYR2;Q6AYK1	RNA-binding protein with serine-rich domain 1	Rnps1	intracellular	34.208	0	11.636	0	0	1388400	6	0	0	6	0	0	2	0	0	2	0	0	2	0	0	3	0	0	20109000
1655800	0	0	1655800	A0A091D1I9;P62909;G5AS76;D3ZVH2;A2IA98	A0A091D1I9;P62909;G5AS76;D3ZVH2	40S ribosomal protein S3	Rps3;RGD1560831		26.674	0	18.671	0	0	2658500	3	0	0	3	0	0	3	0	0	3	0	0	3	0	0	18.9	0	0	31459000
1645400	0	0	1645400	A0A091D2H5;A0A0P6IZC1;A0A091E392;G5BLB3;B0K020	A0A091D2H5;A0A0P6IZC1;A0A091E392;G5BLB3;B0K020	CDGSH iron-sulfur domain-containing protein 1	Cisd1	membrane protein	10.4	0.0019417	6.2209	0	0	671350	2	0	0	2	0	0	1	0	0	1	0	0	1	0	0	16.3	0	0	8226900
1629700	0	0	1629700	A0A0H2UH99;G5C020;M0RBD1;P83732	A0A0H2UH99;G5C020;M0RBD1;P83732	60S ribosomal protein L24	RGD1560821;Rpl24		17.676	0.0051635	5.9768	0	0	1094100	2	0	0	2	0	0	1	0	0	1	0	0	1	0	0	7.1	0	0	13038000
1557800	0	0	1557800	Q9JK59	Q9JK59		Bak1	membrane protein	23.153	0	11.46	0	0	1475200	1	0	0	1	0	0	1	0	0	1	0	0	1	0	0	15.8	0	0	17136000
1548700	0	0	1548700	G5BQ49;A0A091DH38;Q7TP42	G5BQ49;A0A091DH38;Q7TP42		Sec62	membrane protein	20.373	0	15.292	0	0	1174300	4	0	0	4	0	0	2	0	0	2	0	0	2	0	0	7.2	0	0	15487000
1538600	0	0	1538600	B0BMT6;Q7TP19;Q9Z0T0	B0BMT6;Q7TP19;Q9Z0T0	Thiopurine S-methyltransferase	Tpmt	intracellular	27.691	0	69.267	0	0	1976200	3	0	0	3	0	0	1	0	0	1	0	0	1	0	0	5.8	0	0	23079000
1514000	0	0	1514000	Q5I0J5	Q5I0J5	MIT domain-containing protein 1	Mitd1	intracellular	28.848	0.0051903	5.9881	0	0	1600200	1	0	0	1	0	0	1	0	0	1	0	0	1	0	0	6.8	0	0	19682000
1466700	0	0	1466700	M0R637	M0R637		Mettl1		30.569	0	6.8092	0	0	1327300	4	0	0	4	0	0	1	0	0	1	0	0	1	0	0	4.1	0	0	14667000
1456700	0	0	1456700	G5BX02;G5AKC1;A0A0P6JB60;A0A091DUV4;Q62760	G5BX02;G5AKC1;A0A0P6JB60;A0A091DUV4;Q62760	Mitochondrial import receptor subunit TOM20 homolog	Tomm20		15.801	0.009901	5.8795	0	0	796810	2	0	0	2	0	0	1	0	0	1	0	0	1	0	0	9.4	0	0	10197000
1448900	0	0	1448900	Q5PPJ4	Q5PPJ4	Deoxyhypusine hydroxylase	Dohh		33.076	0	35.297	0	0	2237600	5	0	0	5	0	0	2	0	0	2	0	0	2	0	0	4	0	0	26080000
1413400	0	0	1413400	A0A0P6IZH2;A0A091CLV4;P62775;G5AM59	A0A0P6IZH2;A0A091CLV4;P62775;G5AM59	Myotrophin	Mtpn		12.861	0	49.098	0	0	706350	3	0	0	3	0	0	2	0	0	2	0	0	2	0	0	22.9	0	0	8480400
1410800	0	0	1410800	G5BS92;G5C1S7;A0A091CIS5;Q9QZ86	G5BS92;G5C1S7;A0A091CIS5;Q9QZ86	Nucleolar protein 58	Nop58		34.306	0	71.658	0	0	1334500	4	0	0	4	0	0	2	0	0	2	0	0	2	0	0	5.2	0	0	18341000
1325900	0	0	1325900	Q5U1W8	Q5U1W8		LOC100911295		10.124	0	6.2873	0	0	199500	1	0	0	1	0	0	1	0	0	1	0	0	1	0	0	12.5	0	0	2651800
1322400	0	0	1322400	G5AUM1;Q9Z269	G5AUM1;Q9Z269	Vesicle-associated membrane protein-associated protein B	Vapb		27.167	0	57.068	0	0	1725900	2	0	0	2	0	0	1	0	0	1	0	0	1	0	0	6.6	0	0	19836000
1311100	0	0	1311100	A0A0G2K7F4;Q95459;O78088;O46875;D3ZKH0;P79589;Q6MG28	A0A0G2K7F4;Q95459;O78088;O46875;D3ZKH0;P79589;Q6MG28		RT1.Cg;RT1-CE16;RT1.A(n)		30.373	0.0053957	6.0659	0	0	966050	3	0	0	3	0	0	1	0	0	1	0	0	1	0	0	4.9	0	0	18356000
1296600	0	0	1296600	R9PXS8	R9PXS8		Pno1		27.803	0	7.6311	0	0	1428200	3	0	0	3	0	0	1	0	0	1	0	0	1	0	0	8	0	0	16856000
1261200	0	0	1261200	D3ZUX5	D3ZUX5		Chchd3		26.434	0	11.627	0	0	1288400	5	0	0	5	0	0	2	0	0	2	0	0	2	0	0	10.6	0	0	16396000
1235900	0	0	1235900	A0A0G2JZB6;Q5M943	A0A0G2JZB6;Q5M943		Thumpd1		15.797	0	14.336	0	0	900440	6	0	0	6	0	0	2	0	0	2	0	0	2	0	0	10.3	0	0	9886900
1177700	0	0	1177700	Q5U4F3	Q5U4F3	Protein FAM107B	Fam107b		15.586	0	9.9544	0	0	777860	1	0	0	1	0	0	1	0	0	1	0	0	1	0	0	13.7	0	0	9421500
1166100	0	0	1166100	A0A0R3SID1	A0A0R3SID1				9.9423	0.0050934	5.9529	0	0	491040	2	0	0	2	0	0	1	0	0	1	0	0	1	0	0	15.4	0	0	5830700
1116600	0	0	1116600	P63025	P63025	Vesicle-associated membrane protein 3	Vamp3		11.48	0.0019157	6.1964	0	0	506820	3	0	0	3	0	0	1	0	0	1	0	0	1	0	0	15.5	0	0	5583200
1106500	0	0	1106500	G5AUI9;D4AC65;A0A091CSR8	G5AUI9;D4AC65;A0A091CSR8		Coa7		25.612	0	45.642	0	0	1597400	3	0	0	3	0	0	1	0	0	1	0	0	1	0	0	5.6	0	0	18810000
1099500	0	0	1099500	Q6AY63	Q6AY63	ADP-sugar pyrophosphatase	Nudt5		24.117	0	7.8962	0	0	1096200	7	0	0	7	0	0	1	0	0	1	0	0	1	0	0	7.3	0	0	13194000
1098500	0	0	1098500	Q3KRD5	Q3KRD5	Mitochondrial import receptor subunit TOM34	Tomm34		34.461	0	7.7315	0	0	1798700	1	0	0	1	0	0	1	0	0	1	0	0	1	0	0	2.9	0	0	20871000
1094700	0	0	1094700	G5APZ4;A0A091CK61;P22509	G5APZ4;A0A091CK61;P22509	rRNA 2-O-methyltransferase fibrillarin	Fbl		33.589	0	17.71	0	0	1803800	5	0	0	5	0	0	1	0	0	1	0	0	1	0	0	4.1	0	0	21894000
1022400	0	0	1022400	A0A0G2K613;Q9EPH2;A0A0P6IWE5;G5B5L6	A0A0G2K613;Q9EPH2;A0A0P6IWE5;G5B5L6	MARCKS-related protein	Marcksl1		19.718	0	12.056	0	0	579430	2	0	0	2	0	0	2	0	0	2	0	0	2	0	0	27.6	0	0	7157100
997420	0	0	997420	A0A091CLY9;D4A8D5;A0A0G2JXT8;G5BMH1	A0A091CLY9;D4A8D5;A0A0G2JXT8;G5BMH1		Flnb		23.042	0.0019268	6.2103	0	0	899980	1	0	0	1	0	0	1	0	0	1	0	0	1	0	0	6.7	0	0	10972000
972270	0	0	972270	Q8VIL3	Q8VIL3	ZW10 interactor	Zwint		30.142	0	158.34	0	0	870720	3	0	0	3	0	0	1	0	0	1	0	0	1	0	0	6.8	0	0	11667000
958720	0	0	958720	Q5PQR0;A0A0P6J6U2;E9PTI6;G5BPU0;A0A091DLU2	Q5PQR0;A0A0P6J6U2;E9PTI6;G5BPU0;A0A091DLU2		Raly		31.049	0	11.693	0	0	1364900	2	0	0	2	0	0	2	0	0	2	0	0	2	0	0	4.4	0	0	16298000
894700	0	0	894700	P46844	P46844	Biliverdin reductase A	Blvra		33.565	0.0018904	6.1741	0	0	1379900	1	0	0	1	0	0	1	0	0	1	0	0	1	0	0	4.7	0	0	15210000
813930	0	0	813930	Q63610-3;Q63610-2;Q63610	Q63610-3;Q63610-2;Q63610	Tropomyosin alpha-3 chain	Tpm3		28.709	0	12.812	0	0	1100000	3	0	0	3	0	0	2	0	0	2	0	0	2	0	0	4.5	0	0	13837000
791290	0	0	791290	Q68FR9;G5AWF3;A0A091E6D2;Q68FR9-2	Q68FR9;G5AWF3;A0A091E6D2;Q68FR9-2	Elongation factor 1-delta	Eef1d		31.33	0	13.337	0	0	947610	5	0	0	5	0	0	2	0	0	2	0	0	2	0	0	7.8	0	0	12661000
775320	0	0	775320	G5C7E6;G5BAD7;B5DEP3	G5C7E6;G5BAD7;B5DEP3	Anaphase-promoting complex subunit 10	Anapc10		21.252	0	6.7147	0	0	736660	4	0	0	4	0	0	1	0	0	1	0	0	1	0	0	7	0	0	8528500
772570	0	0	772570	A0A0P6JD59;A0A091DZZ6;G5B6J0;P45592	A0A0P6JD59;A0A091DZZ6;G5B6J0;P45592	Cofilin-1	Cfl1		18.518	0	6.7379	0	0	683710	1	0	0	1	0	0	1	0	0	1	0	0	1	0	0	8.4	0	0	7725700
756120	0	0	756120	G5BEK1;A0A091DJI4;P68255	G5BEK1;A0A091DJI4;P68255	14-3-3 protein theta	Ywhaq		27.764	0	19.139	0	0	796830	7	0	0	7	0	0	3	0	0	3	0	0	3	0	0	15.1	0	0	10586000
741930	0	0	741930	G5BSE8;G5BQE0;A0A091DP20;D4ACV3;G5BSF0;A0A091DRN1;A0A0P6J3E9;A0A091DAH1;K7S2S2;G5BV53;G5BSF8;G5BSF4;G5BQE8;G5BQE2;G5BH21;A0A0P6K230;A0A091EEF2;A0A091DTS3;G5C0U9;A0A091DTQ4;A0A091DNN5;A0A091DCG2;G5BSG0;A0A091DD53;P0CC09;P02262	G5BSE8;G5BQE0;A0A091DP20;D4ACV3;G5BSF0;A0A091DRN1;A0A0P6J3E9;A0A091DAH1;K7S2S2;G5BV53;G5BSF8;G5BSF4;G5BQE8;G5BQE2;G5BH21;A0A0P6K230;A0A091EEF2;A0A091DTS3;G5C0U9;A0A091DTQ4;A0A091DNN5;A0A091DCG2;G5BSG0;A0A091DD53;P0CC09;P02262	Histone H2A;Histone H2A type 2-A;Histone H2A type 1	Hist2h2ac;Hist2h2aa3		29.61	0	37.516	0	0	926580	2	0	0	2	0	0	2	0	0	1	0	0	1	0	0	6.9	0	0	10387000
729540	0	0	729540	Q62737	Q62737	Cytochrome b-245 light chain	Cyba		20.75	0	7.9999	0	0	413440	1	0	0	1	0	0	1	0	0	1	0	0	1	0	0	14.6	0	0	5106800
726720	0	0	726720	B6DYQ7;A0A0N8ESH7;G5BS94;A0A091DCX2;P04906	B6DYQ7;A0A0N8ESH7;G5BS94;A0A091DCX2;P04906	Glutathione S-transferase P	Gstp1		23.439	0	56.022	0	0	700000	3	0	0	3	0	0	1	0	0	1	0	0	1	0	0	7.6	0	0	8720600
640530	0	0	640530	A0A091CME3;G5BWL5;G5BWL6;G5BAE7;Q5XFX0	A0A091CME3;G5BWL5;G5BWL6;G5BAE7;Q5XFX0	Transgelin-2	Tagln2		22.377	0	107.44	0	0	717600	2	0	0	2	0	0	1	0	0	1	0	0	1	0	0	7.5	0	0	8326900
608900	0	0	608900	D3ZY89	D3ZY89		Taf8		34.116	0	11.838	0	0	714620	4	0	0	4	0	0	1	0	0	1	0	0	1	0	0	5.5	0	0	8524700
606230	0	0	606230	I6L9H8;D4A4T0	I6L9H8;D4A4T0		Stub1		25.398	0	6.5276	0	0	662660	1	0	0	1	0	0	1	0	0	1	0	0	1	0	0	8.5	0	0	8487200
581970	0	0	581970	F1M3H8;G5B1W1;A0A091D8T7	F1M3H8;G5B1W1;A0A091D8T7		Hnrnpa0		30.076	0	15.642	0	0	827330	3	0	0	3	0	0	2	0	0	2	0	0	2	0	0	7.6	0	0	8147600
580050	0	0	580050	Q63396	Q63396	Activated RNA polymerase II transcriptional coactivator p15	Sub1		14.441	0.001912	6.1946	0	0	215100	2	0	0	2	0	0	1	0	0	1	0	0	1	0	0	15	0	0	2900300
573930	0	0	573930	Q5FVG5;P58775-2	Q5FVG5;P58775-2		Tpm2		32.957	0.001845	6.1414	0	0	955430	1	0	0	1	0	0	1	0	0	1	0	0	1	0	0	5.3	0	0	9183000
536040	0	0	536040	A0A0G2KAG3;G5C7W3;A0A0G2K2R1;Q811A7;G5C3D9;Q8R2H0;G5B1Z0;B2GUV5;A0A0P6J1N8;A0A091D6U3;A0A091CTY0;G5B3G8	A0A0G2KAG3;G5C7W3;A0A0G2K2R1;Q811A7;G5C3D9;Q8R2H0;G5B1Z0;B2GUV5;A0A0P6J1N8;A0A091D6U3;A0A091CTY0;G5B3G8		Atp6G;Atp6v1g2;Atp6v1g1		5.0876	0	11.244	0	0	129410	2	0	0	2	0	0	2	0	0	2	0	0	2	0	0	34.8	0	0	1608100
534020	0	0	534020	F1LM82;A7VJC2-3;A7VJC2-2;B2GV69;G5BD43;F1LNF1;A0A091DML8	F1LM82;A7VJC2-3;A7VJC2-2;B2GV69;G5BD43;F1LNF1;A0A091DML8	Heterogeneous nuclear ribonucleoproteins A2/B1	Hnrnpa2b1		32.487	0	6.2525	0	0	663650	1	0	0	1	0	0	4	0	0	1	0	0	1	0	0	19.3	0	0	9612300
506370	0	0	506370	G5B6U4;A0A091CNR7;P63322	G5B6U4;A0A091CNR7;P63322	Ras-related protein Ral-A	Rala		23.583	0.0052083	5.992	0	0	399540	1	0	0	1	0	0	1	0	0	1	0	0	1	0	0	7.3	0	0	4557300
506240	0	0	506240	Q6AYP7	Q6AYP7	7-methylguanosine phosphate-specific 5-nucleotidase	Nt5c3b		34.535	0.0054152	6.0696	0	0	807180	3	0	0	3	0	0	1	0	0	1	0	0	1	0	0	3	0	0	9618500
489300	0	0	489300	D3ZLT1	D3ZLT1		Ndufb7		16.568	0.0082919	5.8871	0	0	302510	1	0	0	1	0	0	1	0	0	1	0	0	1	0	0	11.7	0	0	3914400
481990	0	0	481990	F1LMW7;P30009	F1LMW7;P30009	Myristoylated alanine-rich C-kinase substrate	Marcks		29.959	0	24.657	0	0	422980	2	0	0	2	0	0	1	0	0	1	0	0	1	0	0	10.7	0	0	6747800
466410	0	0	466410	A2IAA1;D4A201;G5B842;D4A7Z2;A0A0P6JT91;P61928	A2IAA1;D4A201;G5B842;D4A7Z2;A0A0P6JT91;P61928	Ribosomal protein L37;60S ribosomal protein L37	RGD1560186;LOC100360654;Rpl37		10.565	0.0052632	5.9983	0	0	151040	1	0	0	1	0	0	1	0	0	1	0	0	1	0	0	10.9	0	0	1865600
461220	0	0	461220	A0A059NZR0;A0A091DJU4;Q6AXU6	A0A059NZR0;A0A091DJU4;Q6AXU6	Hematological and neurological expressed 1 protein;Hematological and neurological expressed 1 protein, N-terminally processed	Hn1		15.575	0.0036496	6.0926	0	0	312750	1	0	0	1	0	0	1	0	0	1	0	0	1	0	0	9.4	0	0	3689800
433500	0	1923.2	431580	D3ZU54;B0BNB2	D3ZU54;B0BNB2		Denr		21.825	0	6.6152	0	0	391310	3	0	0	3	0	1	1	0	1	1	0	1	1	0	6.7	6.7	0	19232	4315800
420250	0	0	420250	A0A0G2K7W8;F1M9G8;Q8K3P7	A0A0G2K7W8;F1M9G8;Q8K3P7	Histidine triad nucleotide-binding protein 3	Hint3		14.317	0	14.295	0	0	184400	2	0	0	2	0	0	1	0	0	1	0	0	1	0	0	15.4	0	0	2941800
387290	0	0	387290	A0A0G2KB28;O55215;O55211;O55214;O55212;A0A0U1RVI9;D3ZIY7;G5ATV0;M0RAJ8;D3ZAS1;A0A0P6JUG3;P27952	A0A0G2KB28;O55215;O55211;O55214;O55212;A0A0U1RVI9;D3ZIY7;G5ATV0;M0RAJ8;D3ZAS1;A0A0P6JUG3;P27952	40S ribosomal protein S2	Rps2-ps6;LOC688473;RGD1562399;Rps2		24.793	0.0018519	6.1469	0	0	417270	1	0	0	1	0	0	1	0	0	1	0	0	1	0	0	5.2	0	0	5034700
351410	0	0	351410	A0A0P6JFD6	A0A0P6JFD6				16.79	0	6.4019	0	0	270610	2	0	0	2	0	0	1	0	0	1	0	0	1	0	0	11.3	0	0	3162700
334730	0	0	334730	G5BGW2;A0A091CW34;G5B1L0;X1WI37;D3ZX01;G5B5Y3;A0A0P6JF61;A0A091CTG7;A0A0H2UHX3;P62703	G5BGW2;A0A091CW34;G5B1L0;X1WI37;D3ZX01;G5B5Y3;A0A0P6JF61;A0A091CTG7;A0A0H2UHX3;P62703	40S ribosomal protein S4;40S ribosomal protein S4, X isoform	LOC100362640;Rps4y2;Rps4x		26.683	0.006689	5.904	0	0	357700	2	0	0	2	0	0	1	0	0	1	0	0	1	0	0	3.8	0	0	5021000
319520	0	0	319520	B2GV72	B2GV72		Cbr3		30.841	0.0018622	6.1527	0	0	378570	2	0	0	2	0	0	1	0	0	1	0	0	1	0	0	4.3	0	0	5112300
313840	0	0	313840	A0A091DDV5;B2RYG6	A0A091DDV5;B2RYG6	Ubiquitin thioesterase OTUB1	Otub1		31.27	0	12.521	0	0	396160	2	0	0	2	0	0	1	0	0	1	0	0	1	0	0	12.9	0	0	4707500
296380	0	0	296380	Q8R4R9	Q8R4R9	Protein phosphatase 1 regulatory subunit 14C	Ppp1r14c		17.98	0	6.7447	0	0	205730	2	0	0	2	0	0	1	0	0	1	0	0	1	0	0	11.6	0	0	2074700
291220	0	0	291220	P41350-2;B1WBN8	P41350-2;B1WBN8	Caveolin	Cav1		17.104	0	6.5814	0	0	233800	1	0	0	1	0	0	1	0	0	1	0	0	1	0	0	10.2	0	0	2621000
283620	0	0	283620	G5B3G2;D3ZNQ6;A0A091E1J3	G5B3G2;D3ZNQ6;A0A091E1J3		Ube2m		16.982	0.0018797	6.165	0	0	198290	1	0	0	1	0	0	1	0	0	1	0	0	1	0	0	6.8	0	0	2552600
266160	0	0	266160	Q9WU49	Q9WU49	Calcium-regulated heat stable protein 1	Carhsp1		15.906	0	6.6725	0	0	135150	1	0	0	1	0	0	1	0	0	1	0	0	1	0	0	16.3	0	0	1863100
261890	0	0	261890	B2RZ66	B2RZ66		Srp19		16.138	0.001938	6.2208	0	0	133430	3	0	0	3	0	0	1	0	0	1	0	0	1	0	0	10.4	0	0	1833300
260380	0	0	260380	Q497A9	Q497A9		Eif4ebp2		12.886	0	6.3073	0	0	80840	2	0	0	2	0	0	1	0	0	1	0	0	1	0	0	11.7	0	0	1041500
257640	0	0	257640	M0R3X6;A0A0G2JSV2;A0A0G2K658;P47727	M0R3X6;A0A0G2JSV2;A0A0G2K658;P47727	Carbonyl reductase [NADPH] 1	Cbr1		30.611	0	69.941	0	0	390710	1	0	0	1	0	0	1	0	0	1	0	0	1	0	0	4.3	0	0	4379900
256950	0	0	256950	A0A091DI07;Q4V8E2;G5BT32	A0A091DI07;Q4V8E2;G5BT32		Psmd14		32.924	0	6.498	0	0	327240	1	0	0	1	0	0	1	0	0	1	0	0	1	0	0	5.4	0	0	4111200
256800	0	0	256800	O35109;O35108;Q76N43;O35110;A0A096MKA1;A0A096MIY2;Q5D023;Q62698	O35109;O35108;Q76N43;O35110;A0A096MKA1;A0A096MIY2;Q5D023;Q62698	Cytoplasmic dynein 1 light intermediate chain 2	Dync1li2		25.789	0.005102	5.9585	0	0	295940	2	0	0	2	0	0	1	0	0	1	0	0	1	0	0	7.7	0	0	3852000
242760	0	0	242760	B0BNK1	B0BNK1		Rab5c		23.425	0	7.4146	0	0	190030	2	0	0	2	0	0	1	0	0	1	0	0	1	0	0	5.6	0	0	2670400
241100	0	0	241100	G5BH44;A0A0G2K9Q1;A0A091CLJ5;Q66H74	G5BH44;A0A0G2K9Q1;A0A091CLJ5;Q66H74	Golgi phosphoprotein 3-like	Golph3l		32.828	0	9.0842	0	0	365630	1	0	0	1	0	0	1	0	0	1	0	0	1	0	0	5.3	0	0	4098800
240680	0	0	240680	Q5I0L4	Q5I0L4	Cytosolic Fe-S cluster assembly factor NUBP1	Nubp1		34.045	0	7.0001	0	0	205280	2	0	0	2	0	0	1	0	0	1	0	0	1	0	0	5.6	0	0	2406800
222720	0	0	222720	O88752;G5BYJ8;G5BS35;G5BS33;A0A0A7HRP5;A0A091EKH2;A0A091DVA1	O88752;G5BYJ8;G5BS35;G5BS33;A0A0A7HRP5;A0A091EKH2;A0A091DVA1		Hbe1		16.104	0	6.5192	0	0	231720	1	0	0	1	0	0	1	0	0	1	0	0	1	0	0	5.4	0	0	2227200
217560	0	0	217560	A0A0G2K6H5;Q75UQ2	A0A0G2K6H5;Q75UQ2	Craniofacial development protein 1	Cfdp1		31.31	0	66.831	0	0	264200	1	0	0	1	0	0	1	0	0	1	0	0	1	0	0	5.6	0	0	3263400
190180	190180	0	0	B0K010	B0K010		Txndc17		14.092	0	8.3438	249430	0	0	1	1	0	0	1	0	0	1	0	0	1	0	0	13	0	0	1521400	0	0
188430	0	0	188430	Q3T1J1	Q3T1J1	Eukaryotic translation initiation factor 5A-1	Eif5a		16.832	0.0054446	6.0773	0	0	110610	1	0	0	1	0	0	1	0	0	1	0	0	1	0	0	16.2	0	0	1507500
148630	0	148630	0	A0A091DUB7;G5BV37;G5BQE4;A0A0P6J7Y1;A0A091DP05;G5BQD5;A0A091DTQ7;G5BV30;A0A091DP15;A0A091DZE0	A0A091DUB7;G5BV37;G5BQE4;A0A0P6J7Y1;A0A091DP05;G5BQD5;A0A091DTQ7;G5BV30;A0A091DP15;A0A091DZE0				21.989	0.0019305	6.2157	0	387460	0	2	0	2	0	0	1	1	0	1	0	0	1	0	0	9.6	5.5	0	1337700	0
117980	0	0	117980	A0A0G2K583	A0A0G2K583				31.089	0	10.818	0	0	211070	2	0	0	2	0	0	1	0	0	1	0	0	1	0	0	3.5	0	0	2241600
98092	0	0	98092	Q4KM60;A0A091CUF4;G5BEX1;P62907	Q4KM60;A0A091CUF4;G5BEX1;P62907	Ribosomal protein;60S ribosomal protein L10a	Rpl10a		23.536	0.0018692	6.156	0	0	78753	1	0	0	1	0	0	1	0	0	1	0	0	1	0	0	6.3	0	0	882830
66963	0	0	66963	D3ZXH7;A0A0S3NT98	D3ZXH7;A0A0S3NT98		Alyref		19.915	0.0053571	6.0445	0	0	37778	1	0	0	1	0	0	1	0	0	1	0	0	1	0	0	6.9	0	0	602670
60864	0	0	60864	Q63942	Q63942	GTP-binding protein Rab-3D	Rab3d		24.29	0.0053286	6.0279	0	0	53413	1	0	0	1	0	0	1	0	0	1	0	0	1	0	0	5	0	0	852100
38322	0	38322	0	O35760	O35760	Isopentenyl-diphosphate Delta-isomerase 1	Idi1		26.396	0	6.5807	0	170360	0	1	0	1	0	0	1	0	0	1	0	0	1	0	0	4.8	0	0	383220	0
36548	0	0	36548	Q5XIK4	Q5XIK4		Magea11		34.679	0	25.658	0	0	45756	6	0	0	6	0	0	3	0	0	3	0	0	3	0	0	13.4	0	0	657860
0	0	0	0	A0A0N4YVW9	A0A0N4YVW9				8.2624	0.0050251	5.9184	0	0	0	1	0	0	1	0	0	1	0	0	1	0	0	1	0	0	11.3	0	0	0
0	0	0	0	D4A5T1	D4A5T1		Sf3b5		10.119	0.0019569	6.2415	0	0	0	1	0	0	1	0	0	1	0	0	1	0	0	1	0	0	17.4	0	0	0
0	0	0	0	G5BDY3	G5BDY3				12.043	0.0019531	6.2395	0	0	0	1	0	0	1	0	0	1	0	0	1	0	0	1	0	0	6.7	0	0	0
0	0	0	0	A0A0N4XTS7;A0A0N4XLC6	A0A0N4XTS7;A0A0N4XLC6				13.135	0.0083056	5.895	0	0	0	1	0	0	1	0	0	1	0	0	1	0	0	1	0	0	9.5	0	0	0
0	0	0	0	G5BEM7	G5BEM7				14.382	0.005059	5.9303	0	0	0	2	0	0	2	0	0	1	0	0	1	0	0	1	0	0	9.4	0	0	0
0	0	0	0	X2CN64	X2CN64				23.419	0.0052448	5.9965	0	0	0	2	0	0	2	0	0	1	0	0	1	0	0	1	0	0	10.3	0	0	0
0	0	0	0	Q6AXT5	Q6AXT5	Ras-related protein Rab-21	Rab21		24.163	0	6.3259	0	0	0	1	0	0	1	0	0	1	0	0	1	0	0	1	0	0	5.8	0	0	0
0	0	0	0	D4AEG2	D4AEG2		Rab32		25.26	0	6.9237	0	0	0	1	0	0	1	0	0	1	0	0	1	0	0	1	0	0	4.9	0	0	0
0	0	0	0	G5BXZ6;G5BSM9;G5BZE7;A0A091CZ69;A0A0P6JG88	G5BXZ6;G5BSM9;G5BZE7;A0A091CZ69;A0A0P6JG88				25.28	0.0052539	5.998	0	0	0	1	0	0	1	0	0	1	0	0	1	0	0	1	0	0	5.7	0	0	0
0	0	0	0	A0A0N4Y3X7	A0A0N4Y3X7				25.466	0.0098684	5.8685	0	0	0	1	0	0	1	0	0	1	0	0	1	0	0	1	0	0	5.8	0	0	0
0	0	0	0	B5DFM4;F1LM55	B5DFM4;F1LM55		RGD1309922;Ccar2		33.424	0	7.6858	0	0	0	1	0	0	1	0	0	1	0	0	1	0	0	1	0	0	6.1	0	0	0
0	0	0	0	A0A0N4YG09;A0A0N4XEG5	A0A0N4YG09;A0A0N4XEG5				34.343	0.0018382	6.14	0	0	0	1	0	0	1	0	0	1	0	0	1	0	0	1	0	0	4.3	0	0	0

## Sheet: Top 40 secreated proteins
iBAQ	iBAQ April	iBAQ May	iBAQ October	Protein IDs	Majority protein IDs	Protein names	Gene names	one name	RNA-seq in Zeb KO	RNA-seq log2fold change	RNA-seqfold change	Classification	Mol. weight [kDa]	Q-value	Score	LFQ intensity April	LFQ intensity May	LFQ intensity October	MS/MS Count	MS/MS Count April	MS/MS Count May	MS/MS Count October	Peptides April	Peptides May	Peptides October	Razor + unique peptides April	Razor + unique peptides May	Razor + unique peptides October	Unique peptides April	Unique peptides May	Unique peptides October	Sequence coverage April [%]	Sequence coverage May [%]	Sequence coverage October [%]	Intensity April	Intensity May	Intensity October
46670000	0	242890	46427000	Q05175	Q05175	Brain acid soluble protein 1	Basp1	Basp1	DOWN	-0.9	0.54	plasma protein	21.79	0	223.84	0	0	38653000	33	0	3	30	0	2	7	0	2	7	0	2	2	0	10.9	51.8	0	2428900	464270000
2209300000	36783000	134410000	2038100000	P06302;Q63453;Q63452;G5BKX6;A0A0N8EUD3	P06302	Prothymosin alpha;Prothymosin alpha, N-terminally processed;Thymosin alpha	Ptma	Ptma	DOWN	-0.51	0.7	plasma protein	12.382	0	323.31	144100000	208630000	478130000	82	13	47	22	5	8	5	5	8	5	5	8	5	25.9	32.1	30.4	110350000	403230000	6114200000
74503000	0	581570	73922000	A0A0A7HRM6;P62329	A0A0A7HRM6;P62329	Thymosin beta-4;Hematopoietic system regulatory peptide	Tmsb4x	Tmsb4x	DOWN	-0.46	0.73	plasma protein	5.0526	0	156.59	0	0	8476400	10	0	1	9	0	1	2	0	1	2	0	1	2	0	31.8	31.8	0	1163100	147840000
3210000	0	0	3210000	G5B771;A0A091CZU9;P63170	G5B771;A0A091CZU9;P63170	Dynein light chain 1, cytoplasmic	Dynll1	Dynll1	DOWN	-0.43	0.74	plasma protein	10.366	0	323.31	0	0	1205400	4	0	0	4	0	0	1	0	0	1	0	0	1	0	0	24.7	0	0	16050000
12759000	0	0	12759000	G5BB30;P35213;A0A091E596	G5BB30;P35213	14-3-3 protein beta/alpha;14-3-3 protein beta/alpha, N-terminally processed	Ywhab	Ywhab	DOWN	-0.38	0.77	plasma protein	28.082	0	43.323	0	0	11824000	21	0	0	21	0	0	4	0	0	4	0	0	3	0	0	13.4	0	0	178620000
2356800	0	0	2356800	E0A3M4;Q6P6Q5;A0A091CQV1;G5BQQ4;A0A0P6JDI2;P08592-2;P08592	E0A3M4;Q6P6Q5;A0A091CQV1;G5BQQ4;A0A0P6JDI2;P08592-2;P08592	Amyloid beta A4 protein;N-APP;Soluble APP-alpha;Soluble APP-beta;C99;Beta-amyloid protein 42;Beta-amyloid protein 40;C83;P3(42);P3(40);C80;Gamma-secretase C-terminal fragment 59;Gamma-secretase C-terminal fragment 57;Gamma-secretase C-terminal fragment 50;C31	App	App	DOWN	-0.36	0.78	plasma protein	11.552	0	6.5537	0	0	1531900	2	0	0	2	0	0	1	0	0	1	0	0	1	0	0	11.4	0	0	16498000
58671000	0	0	58671000	A0A0U1RS43;Q99JC6;A0A023IM54	A0A0U1RS43;Q99JC6;A0A023IM54		Tapbp	Tapbp	DOWN	-0.31	0.81	plasma protein	6.3802	0	8.1717	0	0	14359000	6	0	0	6	0	0	1	0	0	1	0	0	1	0	0	21.7	0	0	176010000
132480000	0	0	132480000	G5BRQ3;P63312	G5BRQ3;P63312	Thymosin beta-10	Tmsb10	Tmsb10	DOWN	-0.3	0.81	plasma protein	5.0256	0	63.047	0	0	21077000	4	0	0	4	0	0	2	0	0	2	0	0	2	0	0	36.4	0	0	264950000
3781200	0	0	3781200	D3ZD11	D3ZD11		Spcs2	Spcs2	DOWN	-0.25	0.84	plasma protein	24.973	0	297.84	0	0	3836600	12	0	0	12	0	0	2	0	0	2	0	0	2	0	0	13.7	0	0	45374000
57620000	0	0	57620000	G5C3G0;A0A0N8EUW0;G5C3F9;Q6MG61	G5C3G0;A0A0N8EUW0;G5C3F9;Q6MG61	Chloride intracellular channel protein 1	Clic1	Clic1	DOWN	-0.22	0.86	plasma protein	26.318	0	32.549	0	0	72672000	6	0	0	6	0	0	2	0	0	2	0	0	2	0	0	12.8	0	0	864300000
2636000	0	0	2636000	A0A0G2JZE6;A0A0P6J231;G5B7J7;A0A091CSG2;P63245	A0A0G2JZE6;A0A0P6J231;G5B7J7;A0A091CSG2;P63245	Guanine nucleotide-binding protein subunit beta-2-like 1;Guanine nucleotide-binding protein subunit beta-2-like 1, N-terminally processed	Gnb2l1	Gnb2l1	DOWN	-0.22	0.86	plasma protein	32.738	0	12.936	0	0	4558200	3	0	0	3	0	0	2	0	0	2	0	0	2	0	0	3.7	0	0	50083000
7589900	0	0	7589900	G5C5Z3;A0A0P6IZP9;A0A091DEE5;E9PU16;Q7TPK7;A0A0G2K235;Q6NYB7	G5C5Z3;A0A0P6IZP9;A0A091DEE5;E9PU16;Q7TPK7;A0A0G2K235;Q6NYB7	Ras-related protein Rab-1A	Rab1;Rab1a;Rab1A	Rab1	unchanged	-0.19	0.88	plasma protein	21.825	0	158.77	0	0	7614900	12	0	0	12	0	0	3	0	0	3	0	0	3	0	0	8.6	0	0	106260000
12439000	0	0	12439000	P36972	P36972	Adenine phosphoribosyltransferase	Aprt	Aprt	unchanged	-0.18	0.89	plasma protein	19.546	0	89.929	0	0	12317000	2	0	0	2	0	0	1	0	0	1	0	0	1	0	0	6.1	0	0	149270000
5016500	0	0	5016500	A0A0G2K2B8;P68511;G5BBV6;G5BTX3;A0A091D8Z7;A0A091CZK1	A0A0G2K2B8;P68511;G5BBV6;G5BTX3;A0A091D8Z7;A0A091CZK1	14-3-3 protein eta	Ywhah	Ywhah	unchanged	-0.17	0.89	plasma protein	31.699	0	13.202	0	0	7888600	4	0	0	4	0	0	2	0	0	2	0	0	2	0	0	7.7	0	0	90297000
5227500	0	34559	5192900	G5AP01;P63102;A0A091DLH5;A0A091DN51;A0A0G2JV65;A0A091DSZ1	G5AP01;P63102;A0A091DLH5;A0A091DN51;A0A0G2JV65;A0A091DSZ1	14-3-3 protein zeta/delta	Ywhaz	Ywhaz	unchanged	-0.15	0.9	plasma protein	27.745	0	13.936	0	0	4758000	8	0	1	7	0	1	2	0	1	2	0	1	2	0	3.7	9.4	0	483830	72701000
23215000	0	0	23215000	G5BMF7;G5BNC2;F1M2K3;G5BF89;A0A091CWJ1;A0A091D7J0;P61959;Q5XIF4	G5BMF7;G5BNC2;F1M2K3;G5BF89;A0A091CWJ1;A0A091D7J0;P61959;Q5XIF4	Small ubiquitin-related modifier 2;Small ubiquitin-related modifier 3	Sumo2;Sumo3	Sumo2;Sumo3	unchanged	-0.11	0.92	sumo2=intracellular, sumo3=plasma	9.8229	0	7.3803	0	0	3942700	2	0	0	2	0	0	1	0	0	1	0	0	1	0	0	14	0	0	46430000
5109200	0	0	5109200	A0A0G2JWE1;A0A0P6J1F8;A0A0G2K6J5;A0A091DT92;B2GV99;Q64119;G5BB85;A0A091DP40	A0A0G2JWE1;A0A0P6J1F8;A0A0G2K6J5;A0A091DT92;B2GV99;Q64119;G5BB85;A0A091DP40	Myosin light polypeptide 6	Myl6	Myl6	unchanged	-0.11	0.93	plasma protein	12.528	0	23.125	0	0	3505700	6	0	0	6	0	0	2	0	0	2	0	0	2	0	0	22.5	0	0	40874000
3084900	0	0	3084900	Q498U4	Q498U4	SAP domain-containing ribonucleoprotein	Sarnp	Sarnp	unchanged	-0.1	0.93	plasma protein	23.605	0	17.536	0	0	2891300	2	0	0	2	0	0	2	0	0	2	0	0	2	0	0	5.2	0	0	37019000
26040000	0	0	26040000	G5BJ78;A0A0S3NT96;Q5XI73	G5BJ78;A0A0S3NT96;Q5XI73	Rho GDP-dissociation inhibitor 1	Arhgdia	Arhgdia	unchanged	-0.08	0.95	plasma protein	23.412	0	34.342	0	0	20644000	7	0	0	7	0	0	1	0	0	1	0	0	1	0	0	15.7	0	0	234360000
9694100	0	0	9694100	G5AXS2;B0BMW0;A0A091D0U8;P61107	G5AXS2;B0BMW0;A0A091D0U8;P61107	Ras-related protein Rab-14	Rab14	Rab14	unchanged	-0.05	0.97	plasma protein	23.897	0	36.81	0	0	12507000	4	0	0	4	0	0	2	0	0	2	0	0	2	0	0	7	0	0	155110000
2373000	0	0	2373000	G5AXQ7;A0A0G2K2G8;P09495	G5AXQ7;A0A0G2K2G8;P09495	Tropomyosin alpha-4 chain	Tpm4	Tpm4	unchanged	-0.05	0.97	plasma protein	7.9628	0.0054545	6.0831	0	0	681090	2	0	0	2	0	0	1	0	0	1	0	0	1	0	0	14.1	0	0	7118900
13349000	0	0	13349000	A0A091DXM3;G3V9R8;A0A0G2K7B3;G5BFV5;A0A0P6J9Y6;A0A0G2JXW4;G5B8D1	A0A091DXM3;G3V9R8;A0A0G2K7B3;G5BFV5;A0A0P6J9Y6;A0A0G2JXW4		Hnrnpc	Hnrnpc	unchanged	-0.04	0.97	plasma protein	32.453	0	18.749	0	0	20923000	6	0	0	6	0	0	3	0	0	3	0	0	3	0	0	7.8	0	0	240270000
20907000	0	0	20907000	Q5RJL1;A0A0G2JYP0;G5BT65;A0A0G2JYS6;Q5RJK5;D3ZRS6;A0A0P6JHX7	Q5RJL1;A0A0G2JYP0;G5BT65;A0A0G2JYS6;Q5RJK5;D3ZRS6;A0A0P6JHX7		Cbx3;LOC100360260	Cbx3	unchanged	0.02	1.02	plasma protein	7.9271	0	28.737	0	0	3745600	4	0	0	4	0	0	2	0	0	2	0	0	2	0	0	16.9	0	0	41813000
4355700	0	0	4355700	A0A091EHN5;G5BT96;P62997	A0A091EHN5;G5BT96;P62997	Transformer-2 protein homolog beta	Tra2b	Tra2b	unchanged	0.02	1.01	plasma protein	29.516	0	18.918	0	0	4267700	4	0	0	4	0	0	1	0	0	1	0	0	1	0	0	5.5	0	0	52269000
3256800	0	0	3256800	G5C9S0;Q6P685;A0A0P6K6M1;G5B574;G5BAU6;G5B4T8;G5AMH7;G5BD07;G5BPT9;A0A091DK41	G5C9S0;Q6P685;A0A0P6K6M1;G5B574		Eif2s2	Eif2s2	unchanged	0.02	1.02	plasma protein	26.038	0	323.31	0	0	2598200	7	0	0	7	0	0	3	0	0	3	0	0	3	0	0	11.4	0	0	29312000
2448100	0	0	2448100	Q99MZ8	Q99MZ8	LIM and SH3 domain protein 1	Lasp1	Lasp1	unchanged	0.03	1.02	plasma protein	29.97	0	12.984	0	0	2588500	5	0	0	5	0	0	2	0	0	2	0	0	2	0	0	5.3	0	0	34273000
7294600	0	0	7294600	G5BR22;G5AP82;D4ADF5	G5BR22;G5AP82;D4ADF5		Pdcd5	Pdcd5	unchanged	0.04	1.05	plasma protein	14.328	0	29.46	0	0	6026500	3	0	0	3	0	0	2	0	0	2	0	0	2	0	0	8	0	0	72946000
6881200	0	0	6881200	Q4AE93;G5AMJ3;E3VX50;E3VX49;P62634	Q4AE93;G5AMJ3;E3VX50;E3VX49;P62634	Cellular nucleic acid-binding protein	Cnbp	Cnbp	unchanged	0.05	1.04	plasma protein	2.5578	0	61.325	0	0	1211500	3	0	0	3	0	0	1	0	0	1	0	0	1	0	0	41.7	0	0	13762000
20938000	0	41247	20897000	A0A091CMW5;G5AQI3;Q76MJ6;D3ZEV0;A0A0P6JUJ6;Q3ZAV2;A0A091E4W6;P62961	A0A091CMW5;G5AQI3;Q76MJ6;D3ZEV0;A0A0P6JUJ6;Q3ZAV2;A0A091E4W6;P62961	Nuclease-sensitive element-binding protein 1	Ybx1;LOC100912427	Ybx1	unchanged	0.1	1.07	plasma protein	27.704	0	257.35	0	0	15845000	12	0	1	11	0	1	2	0	1	2	0	1	2	0	8.3	16.2	0	371220	188070000
14615000	0	0	14615000	A0A0A7HUH5;P62828;A0A0R3SHN7;Q66H11;A0A0N4YDT1;A0A0K0DKR3;A0A091CYZ6	A0A0A7HUH5;P62828;A0A0R3SHN7;Q66H11;A0A0N4YDT1;A0A0K0DKR3	GTP-binding nuclear protein Ran	Ran;RGD1306195	Ran	unchanged	0.12	1.09	plasma protein	24.423	0	37.245	0	0	13364000	11	0	0	11	0	0	3	0	0	3	0	0	3	0	0	16.7	0	0	160760000
94354000	16767000	218800	77369000	P07632;Q6LDS4;Q6PEC5;D4PAS2;A0A0P6JIA7;G5BEA6;A0A091CV69	P07632;Q6LDS4;Q6PEC5	Superoxide dismutase [Cu-Zn]	Sod1	Sod1	unchanged	0.16	1.12	plasma protein	15.911	0	284.13	68896000	0	59154000	52	26	2	24	9	2	8	9	2	8	9	2	8	47.4	16.2	55.2	150900000	1969200	696320000
16948000	0	0	16948000	D4ACJ7;Q6P6G9;Q5I0M7;A0A0P6JBQ6;P04256;G5BID7;G5C268	D4ACJ7;Q6P6G9;Q5I0M7;A0A0P6JBQ6;P04256;G5BID7	Heterogeneous nuclear ribonucleoprotein A1;Heterogeneous nuclear ribonucleoprotein A1, N-terminally processed	Hnrnpa1;Hnrpa1	Hnrnpa1	unchanged	0.18	1.13	plasma protein	26.728	0	323.31	0	0	17668000	22	0	0	22	0	0	3	0	0	3	0	0	3	0	0	12.2	0	0	203370000
5933300	0	0	5933300	O35050;A0A0P6K8J3;A0A091CM57;P62198	O35050;A0A0P6K8J3;A0A091CM57;P62198	26S protease regulatory subunit 8	Psmc5	Psmc5	unchanged	0.19	1.14	plasma protein	3.614	0.0019194	6.1983	0	0	479840	1	0	0	1	0	0	1	0	0	1	0	0	1	0	0	43.8	0	0	5933300
2868600	166070	475780	2226700	A0A0G2JWJ4;P48500;G5CAR5;Q6SA19;A0A091CQ98;A0A0G2JWU1	A0A0G2JWJ4;P48500;G5CAR5;Q6SA19;A0A091CQ98;A0A0G2JWU1	Triosephosphate isomerase	Tpi1;LOC500959	Tpi1	UP	0.22	1.17	plasma protein	29.057	0	32.023	0	2999200	3780000	15	2	6	7	1	3	3	1	3	3	1	3	3	4.9	13.3	13.3	3155300	9039900	42308000
19137000	0	0	19137000	Q9JI54;O88791	Q9JI54;O88791		Hmga2	Hmga2	UP	1.82	3.54	plasma protein	3.8282	0	29.802	0	0	1658200	10	0	0	10	0	0	4	0	0	4	0	0	4	0	0	70.3	0	0	19137000
441000000	0	0	441000000	Q62587;A0ELY5;A0ELY2;P01322	Q62587;A0ELY5;A0ELY2;P01322	Insulin-1;Insulin-1 B chain;Insulin-1 A chain	Ins1	Ins1	NA			plasma protein	12.324	0	7.3307	0	0	150820000	0	0	0	0	0	0	1	0	0	1	0	0	1	0	0	6.4	0	0	1764000000
204850000	0	0	204850000	B6ID08;P04355;D3ZHV3;G5CB62	B6ID08;P04355;D3ZHV3	Metallothionein;Metallothionein-2	Mt2A;Mt2;Mt1m	Mt2A	NA			plasma protein	6.1453	0	323.31	0	0	49311000	28	0	0	28	0	0	6	0	0	6	0	0	4	0	0	91.8	0	0	614560000
11921000	0	0	11921000	A0A0G2K2E4;A0A0G2K1P0;P10111	A0A0G2K2E4;A0A0G2K1P0;P10111	Peptidyl-prolyl cis-trans isomerase A;Peptidyl-prolyl cis-trans isomerase A, N-terminally processed	Ppia	Ppia	NA			plasma protein	17.822	0	149.25	0	0	8591900	8	0	0	8	0	0	2	0	0	2	0	0	1	0	0	16.5	0	0	107290000
11100000	0	0	11100000	G5C400;G5BSI3;G5BG97;Q5U3Y8;M0R5M7;G5CB15;G5AVD5;G5ASH0;A0A0G2K5C5;G5B3W8	G5C400;G5BSI3;G5BG97;Q5U3Y8;M0R5M7;G5CB15;G5AVD5;G5ASH0;A0A0G2K5C5;G5B3W8		Btf3;RGD1563812	Btf3	NA			plasma protein	12.295	0	15.179	0	0	3681700	5	0	0	5	0	0	1	0	0	1	0	0	1	0	0	9.6	0	0	55502000
3624300	0	3624300	0	Q71DI1	Q71DI1		Dermcidin	DCD	NA			plasma protein	11.284	0	122.8	0	1590800	0	2	0	2	0	0	2	0	0	2	0	0	2	0	0	20.9	0	0	18121000	0

## Sheet: 11 prot that goes down in RNA-s
one name	RNA-seq in Zeb KO	RNA-seq log2fold change	RNA-seqfold change	Classification	Function
Basp1	DOWN	-0.9	0.88	plasma protein	link to WT1 signaling
Ptma	DOWN	-0.51	0.7	plasma protein	protect cardiomyocytes against ischemia-induced apoptosis via preservation of Akt
Tmsb4x	DOWN	-0.46	0.73	plasma protein	involved in cardiac repair
Dynll1	DOWN	-0.43	0.74	plasma protein	not linked with heart
Ywhab	DOWN	-0.38	0.77	plasma protein	not linked with heart
App	DOWN	-0.36	0.78	plasma protein	Amyloid precursor protein not clear link with heart
Tmsb10	DOWN	-0.3	0.81	plasma protein
Tapbp	DOWN	-0.31	0.81	plasma protein	Tapasin - not linked with heart
Spcs2	DOWN	-0.25	0.84	plasma protein	not linked with heart
Clic1	DOWN	-0.22	0.86	plasma protein
Gnb2l1=Rack1	DOWN	-0.22	0.86	plasma protein	Downregulation of RACK1 is associated with cardiomyocyte apoptosis after myocardial ischemia/reperfusion injury in adult rats
