# Supplementary material for: Cardiomyocytes stimulate angiogenesis after ischemic injury in a ZEB2-dependent manner
Source: Nat Commun. 2021 Jan 4;12:84. doi: 10.1038/s41467-020-20361-3 (PMC7782784; doi:10.1038/s41467-020-20361-3)
Supplement: Supplementary file 9 — Source Data [file 41467_2020_20361_MOESM9_ESM.xlsx]

## Sheet: Figure 2b
Figure 2b	Zeb2 expression
	sham		MI
	Zeb2 fl/fl	Zeb2 cKO	Zeb2 fl/fl	Zeb2 cKO
	0.407536	0.196827	2.25793	0.272627
	0.955945	0.399149	1.32409	1.00347
	1.32409	0.342696	1.58557	0.505226
	1.93858	0.820742	3.02095	1.1607
			1.89868	0.600818
			1.52098	1.24401

## Sheet: Figure 2d
Figure 2d	Fractional shortening (FS)
	sham		MI
	Zeb2 fl/fl	Zeb2 cKO	Zeb2 fl/fl	Zeb2 cKO
	28.8	20.1	21.2	27.4
	38.83	36.7	20.5	14.7
	43.97	41.1	20.7	16.8
	28.24	30.2	42.6	13.9
	34.27	41.6	14.5	15.1
	24.45	27.8	12.8	3.6
		27.3	21.4	20.9
			27.45	16.2
			24.45	24.1
			29.89	5.5
				6.3

## Sheet: Figure 2e
Figure 2e	Left Ventricular Internal diameter in systole (LVIDs)
	sham		MI
	Zeb2 fl/fl	Zeb2 cKO	Zeb2 fl/fl	Zeb2 cKO
	2.84	4.18	5.09	3.41
	2.39	2.28	4.09	5.49
	1.68	2.81	4.49	5.19
	3.36	2.77	2.25	3.87
	2.62	2.03	5.61	4.28
		3.39	5.16	4.18
		2.85	4.51	4.05
			3.08	4.57
			2.95	3.74
			2.9	6.04
				5.37

## Sheet: Figure 2g
Figure 2g	WB for BCL-XL and GAPDH

## Sheet: Figure 2h
Figure 2h	BCL-XL WB quantification corrected by GAPDH
	MI
	Zeb2 fl/fl	Zeb2 cKO
	1.07829	1.08556
	1.12986	1,425291*	outlier based on Grubbs' test
	1.17168	0.876841
	1.15427	0.883323
	1.0104	0.926664
	1.17006	0.96644
	1.03553	1.00521

## Sheet: Figure 2j
Figure 2j	Cardiomyocytes surface area
	MI
	Zeb2 fl/fl	Zeb2 cKO
	1.37195	1.44787
	1.14571	1.4666
	0.920596	1.61055
	1	1.35859
	Average of Zeb2 fl/fl was set at 1

## Sheet: Figure 2k
Figure 2k	Pecam 1 expression
	sham		MI
	Zeb2 fl/fl	Zeb2 cKO	Zeb2 fl/fl	Zeb2 cKO
	1.18099	1.03527	1.59107	0.864537
	1.04247	0.920188	1.16473	1.19748
	0.90125	1.23114	1.58008	1.34723
	0.90125	1.15669	2.39496	1.03527
			1.89211	1.17284
			1.47427	2,86791*	outlier based on Grubbs' test
			1.05702	1.11729

## Sheet: Figure 2l
Figure 2l	Vegf expression
	sham		MI
	Zeb2 fl/fl	Zeb2 cKO	Zeb2 fl/fl	Zeb2 cKO
	1.10573	1.28788	1.13682	0.798298
	0.885768	1.01045	1.15269	0.837987
	1.06069	0.855595	0,4746711*	0.771105	outlier based on Grubbs' test
	0.962595	1.78386	1.13682	0.929805
			1.16878	1.20164
			1.44894	0.765779
			1.07549	1.01748

## Sheet: Figure 2o
Figure 2o	PECAM1+ vessel area(%) remote
	MI
	Zeb2 fl/fl	Zeb2 cKO
	3.82	2.268
	3.95	2.275
	4.398	2.408
	4.565	1.958

## Sheet: Figure 2p
Figure 2p	PECAM1+ vessel area(%) border zone
	MI
	Zeb2 fl/fl	Zeb2 cKO
	3.16	2.6
	3.98	2.17333
	2.93	1.54

[truncated: 101 more sheets: Figure 3e, Figure 3f, Figure 3g, Figure 3h, Figure 3l, Figure 3m, Figure 4a, Figure 4b, Figure 4e, Figure 4f, Figure 4g, Figure 5c, Figure 5d, Figure 5f, Figure 5g, Figure 5h, Figure 5i, Figure 6c, Figure 6d, Figure 6e …]
